# Supplementary material for: Human axial progenitors generate trunk neural crest cells in vitro
Source: eLife. 2018 Aug 10;7:e35786. doi: 10.7554/eLife.35786 (PMC6101942; doi:10.7554/eLife.35786)
Supplement: Figure 2—figure supplement 1—source data 1. [file elife-35786-fig2-figsupp1-data1.xlsx]

## Sheet: A
	FOLD CHANGE VS ES(=1)
	REPL1	REPL2	REPL3	AVG	STDV	SEM
SOX9	3.82612	1.9247	28.3912	11.3807	12.0533	6.96721
PAX3	57.0408	133486	15487.9	49677.1	59596	34448.6
SNAI1	1.42826	0.423851	2.42351	1.42521	0.816359	0.471884
SNAI2	11.9669	2.53454	55.4713	23.3243	23.0553	13.3267
ZIC3	1201.15	3.1358	13.0456	405.778	562.429	325.104
MSX1	6241.86	7155.23	281770	98389.2	129671	74954.1
NANOG	0.113563	0.0204644	0.14729	0.0937725	0.0536342	0.0310024
OCT	0.0106899	0.430096	0.0337347	0.158174	0.192508	0.111276

## Sheet: B
		TVENUS-SOX2
		T-SOX2-	T+SOX2-	T-SOX2+	T+SOX2+
REPLICATES	1	5.25204	8.32101	10.0564	76.3705
	2	3.21878	3.77608	11.4611	81.544
	3	12.0206	30.0837	4.49992	53.3958
	Average	6.83047	14.0603	8.6725	70.4368
	StdV	3.76268	11.4812	3.00568	12.2335
		TVENUS-CDX2
		T-CDX2-	T+CDX2-	T-CDX2+	T+CDX2+
REPLICATES	1	0.331568	0.0253566	18.8829	80.7602
	2	2.97227	0.320906	15.7803	80.9266
	3	5.95112	3.47575	16.3271	74.2461
	Average	3.08498	1.274	16.9967	78.6443
	StdV	2.29556	1.56154	1.35225	3.11075
		TVENUS-SOX9
		T-SOX9-	T+SOX9-	T-SOX9+	T+SOX9+
REPLICATES	1	16.4197	40.664	2.50318	40.4131
	2	10.3242	20.6624	2.29076	66.7226
	3	8.3047	3.71285	22.0742	65.9082
	Average	11.6829	21.6798	8.95605	57.6813
	StdV	3.44941	15.1024	9.27635	12.215
