# Supplementary material for: Human axial progenitors generate trunk neural crest cells in vitro
Source: eLife. 2018 Aug 10;7:e35786. doi: 10.7554/eLife.35786 (PMC6101942; doi:10.7554/eLife.35786)
Supplement: Figure 2—source data 1. [file elife-35786-fig2-data1.xlsx]

## Sheet: 2C
t-pax3										t-sox9
	percentages										percentages
Field ID scored	t+pax3+	t-pax3+	t+pax3-	t-pax3-			No of nuclei			Field ID scored	t+sox9+	t-sox9+	t+sox9-	t-sox9-			No of nuclei
1	84	1	14	1	100		1023			6	66	3	27	4	100		785	Used as representative example in Figure 2C
2	31	34	7	28	100		899			4	63	0	36	1	100		721
3	63	0	33	4	100		811			1	71	6	18	5	100		685
4	64	5	23	8	100		720	Used as representative example in Figure 2C		Average	66.6667	3	27	3.33333
5	50	2	37	11	100		830			StDv	3.29983	2.44949	7.34847	1.69967
Average	58.4	8.4	22.8	10.4
StDv	17.4883	12.9089	11.2499	9.4361
t-snai2
	percentages
Field ID scored	t+snai2+	t-snai2+	t+snai2-	t-snai2-			No of nuclei
1	38	0	54	8	100		940	Used as representative example in Figure 2C
2	60	0	40	0	100		1425
4	36	0	57	7	100		482
5	38	0	57	5	100		424
Average	43	0	52	5
StDv	9.84886	0	7.03562	3.08221

## Sheet: 2E
		Fold change vs -LDN
		T	FGF8	CDX2	WNT3A	TBX6	SOX2	ZIC3	MSX1	SNAI1	SNAI2	PAX3	SOX9
	EXP1	0.669904	2.73113	0.342748	0.459889	1.50792	8.43026	1.2992	0.117652	0.244033	0.803159	0.0521308	0.517569
	EXP2	0.583838	0.795279	0.302604	0.0375846	0.960149	11.6546	2.01551	0.011334	0.217113	0.678817	0.0721672	0.182388
	EXP3	0.76893	0.76358	0.67389	1.08367	0.96866	2.89581	0.821555	0.673442	0.537188	1.33508	0.809372	1.8692
	Average	0.674224	1.43	0.439747	0.527049	1.14558	7.66024	1.37876	0.267476	0.332778	0.939019	0.311223	0.856385
	StDV	0.0756253	0.92013	0.166373	0.429697	0.256238	3.61699	0.490667	0.290324	0.144957	0.284622	0.352339	0.729123
