# Supplementary material for: Human axial progenitors generate trunk neural crest cells in vitro
Source: eLife. 2018 Aug 10;7:e35786. doi: 10.7554/eLife.35786 (PMC6101942; doi:10.7554/eLife.35786)
Supplement: Figure 3—figure supplement 1—source data 1. [file elife-35786-fig3-figsupp1-data1.xlsx]

## Sheet: Sheet1
		NMP	DAY 6	DAY 9
	T	721.735	38.1944	6.06304		497.679	29.5814	4.64076
	CDX1	3106.42	189.514	55.4864		382.826	143.042	41.8673
	CDX2	31469.2	20232.6	24576.4		15554.9	14786.8	19226.3
	NKX1-2	93.4359	0.63057	0.137137		42.977	0.418871	0.094164
	SOX2	2.23325	1.43228	0.825418		1.36388	0.459679	0.1931
	SOX1	5.92013	4.50304	10.0324		3.91198	2.84672	2.92342
