# Supplementary material for: Human axial progenitors generate trunk neural crest cells in vitro
Source: eLife. 2018 Aug 10;7:e35786. doi: 10.7554/eLife.35786 (PMC6101942; doi:10.7554/eLife.35786)
Supplement: Figure 3—figure supplement 2—source data 1. [file elife-35786-fig3-figsupp2-data1.xlsx]

## Sheet: D
	LDN									NO LDN
		SOX10+HOXC9+	SOX10+HOXC9-	SOX10-HOXC9+	SOX10-HOCX9-						SOX10+HOXC9+	SOX10+HOXC9-	SOX10-HOXC9+	SOX10-HOCX9-
	EXP1	41.3189	6.45151	34.3137	17.9159					EXP1	85.4067	11.5289	1.74945	1.31493
	EXP2	84.849	1.9518	10.6736	2.52563					EXP2	57.2109	18.2893	14.0626	10.4372
	EXP3	94.446	0.374997	4.91374	0.265277					EXP3	83.8888	7.08711	6.26658	2.75753
	AVG	73.538	2.9261	16.6337	6.90227					AVG	75.5021	12.3018	7.35953	4.83655
	STDV	23.1167	2.57461	12.7209	7.84229					STDV	12.9487	4.60582	5.08587	4.0038

## Sheet: F
		TBX6	MSGN1	PAX3
	EXP1	52.1443	58608.8	338.164
	EXP2	33.7693	21495.6	6111.4
	AVG	42.9568	40052.2	3224.78
	STDV	9.18749	18556.6	2886.62
