# Supplementary material for: Human axial progenitors generate trunk neural crest cells in vitro
Source: eLife. 2018 Aug 10;7:e35786. doi: 10.7554/eLife.35786 (PMC6101942; doi:10.7554/eLife.35786)
Supplement: Figure 3—figure supplement 3—source data 1. [file elife-35786-fig3-figsupp3-data1.xlsx]

## Sheet: Sheet1
	AVERAGES FROM 3 INDEPENDENT EXPERIMENTS					STDVs
	OTX2+T+	OTX2+T-	OTX2-T+	OTX2-T-
ES	0.3274	93.9275	0.0519673	5.69309		0.441536	2.25836	0.0734929	2.67266
NMPs	0.00803571	0.247024	49.4357	50.3092		0.00588489	0.0436437	6.73267	6.69491
	AVERAGES FROM 3 INDEPENDENT EXPERIMENTS					STDVs
	NANOG+T+	NANOG+T-	NANOG-T+	NANOG-T-
ES	0.00598444	99.7249	0	0.269069			0.00846328	0.170702	0	0.178374
NMPs	5.63954	1.28511	67.6132	25.4621			3.68218	1.20531	8.96069	11.6027
