# Supplementary material for: Human axial progenitors generate trunk neural crest cells in vitro
Source: eLife. 2018 Aug 10;7:e35786. doi: 10.7554/eLife.35786 (PMC6101942; doi:10.7554/eLife.35786)
Supplement: Figure 3—source data 1. [file elife-35786-fig3-data1.xlsx]

## Sheet: 3C
	Field ID scored	HOXC9+SOX10+	HOXC9+SOX10-	HOXC9-SOX10+	HOXC9-SOX10-			no of cells
	field 1	44	4	27	25	100		735		repl1
	field 2	29	4	35	32	100		912		repl1
	field 3	37	9	31	23	100		914		repl1
	field 11	70	2	25	3	100		939		repl2
	field 12	58	8	23	11	100		905		repl2
	field 14	63	3	23	11	100		961		repl2
	Avg	50.1667	5	27.3333	17.5
	StDv	14.5993	2.58199	4.38432	9.92891

## Sheet: 3F
	Replicate	SOX10+HOXC9-	SOX10+HOXC9+
	1	35.7481	27.4506
	2	37.4485	18.028
	3	7.69231	14.2012
	4	6.56972	81.0587
	5	0.404282	52.4647
	Avg	17.5726	38.6406
	StDv	15.7406	25.0511

## Sheet: 3G
		Fold change vs ES					STDVs
		ES	ANC	"+RA"	NMP-NC
	HOXB1	1	1.25483	123.439	208.487		0.883797	64.2633	108.721
	HOXB2	1	1.69235	694.39	1603.94		1.08159	316.724	677.289
	HOXB4	1	0.561745	2969.02	291666		0.59724	2416.72	224383
	HOXB5	1	2.09274	27660.2	603724		1.48334	12977.2	99350.7
	HOXC8	1	2.21871	1.4799	114792		1.48232	0.130439	57334.3
	HOXC9	1	2.21871	1.58037	802124		1.48232	0.183835	363739

## Sheet: 3H
		Fold change vs ANC
		ANC	"+RA"	NMP-NC
	OTX2	1	2.51046	0.0205814		1.67391	0.0185331
	DMBX1	1	1.581	0.020841		0.984283	0.0200484
	LHX5	1	0.864748	0.0339219		0.619676	0.0144844
	ETS1	1	0.51756	1.24223		0.243776	1.28268
	TFAP2B	1	0.114351	1.76863		0.0551171	0.872766
	SOX8	1	1.40186	1.45379		1.22824	0.587382
	HES6	1	1.75222	40.4401		0.810688	42.1195
