# Supplementary material for: Human axial progenitors generate trunk neural crest cells in vitro
Source: eLife. 2018 Aug 10;7:e35786. doi: 10.7554/eLife.35786 (PMC6101942; doi:10.7554/eLife.35786)
Supplement: Figure 5—source data 1. [file elife-35786-fig5-data1.xlsx]

## Sheet: 5C
FIELD	phox2b+gata3+	phox2b+gata3-	phox2b-gata3+	phox2b-gata3-
1	47	32	1	20
2	35	49	1	15
3	34	48	1	17
4	47	33	3	17
AVG	40.75	40.5	1.5	17.25
STDV	6.25999	8.01561	0.866025	1.78536
FIELD	phox2b+ascl1+	phox2b+ascl1-	phox2b-ascl1+	phox2b-ascl1-
1	70	8	11	11
2	64	9	14	13
3	51	8	29	12
4	67	5	21	7
AVG	63	7.5	18.75	10.75
STDV	7.24569	1.5	6.94172	2.27761
FIELD	phox2b+isl1+	phox2b+isl1-	phox2b-isl1+	phox2b-isl1-
1	67	15	3	15
2	62	13	6	19
3	62	15	4	19
4	66	14	3	17
AVG	64.25	14.25	4	17.5
STDV	2.27761	0.829156	1.22474	1.65831

## Sheet: 5E
		FOLD CHANGE VS ES					STDVs
		ES	d12	d19
	PHOX2A	1	29.8971	88.7506			10.4518	15.6486
	PHOX2B	1	2.0439e+06	372773			470276	45558.4
	ASCL1	1	4872.04	122.657			807.478	18.1409
	GATA2	1	1436.56	429.272			529.004	58.1015
	GATA3	1	1171.03	452.584			294.464	81.8935
	TH	1	310.661	1714.94			79.087	663.727
	DBH	1	523.927	766.434			79.4542	307.378

## Sheet: 5G
		REPL1	REPL2	REPL3	REPL4
	NE	35.3051	61.1703	17.7522	9.47161		pg/nL
	DA	4126.74	4276.01	4412.78	5151.32		pg/nL
