# Supplementary material for: Human axial progenitors generate trunk neural crest cells in vitro
Source: eLife. 2018 Aug 10;7:e35786. doi: 10.7554/eLife.35786 (PMC6101942; doi:10.7554/eLife.35786)
Supplement: Supplementary file 1. [file elife-35786-supp1.xlsx]

## Sheet: Gene list NMPs vs ES
GENE_NAME	baseMean	log2FoldChange	lfcSE	stat	pvalue	padj
5S_rRNA	0.900819	-0.569048	0.651222	-0.873815	0.382219	NA
A1BG	4.98111	-0.138439	0.648965	-0.213323	0.831075	0.90948
A1BG-AS1	30.2358	0.0978022	0.367445	0.266169	0.790109	0.88548
A1CF	1.86951	0.796686	0.709096	1.12352	0.261215	0.427474
A2M	18.9595	1.10755	0.464173	2.38607	0.0170297	0.0455253
A2M-AS1	25.6504	-0.37048	0.387024	-0.957254	0.338439	0.515109
A2ML1	25.1755	-3.77407	0.502363	-7.51264	5.7948e-14	6.64345e-13
A2MP1	1.49618	0.0549005	0.705399	0.077829	0.937964	0.970441
A3GALT2	0.526073	-0.155747	0.533295	-0.292046	0.770251	NA
A4GALT	99.7563	1.28328	0.299364	4.2867	1.81351e-05	9.01887e-05
A4GNT	1.15909	0.691786	0.662803	1.04373	0.296611	NA
AAAS	2003.94	0.276301	0.0914995	3.0197	0.00253024	0.00838148
AACS	936.113	0.556552	0.0935874	5.94687	2.73326e-09	2.12641e-08
AACSP1	1.33021	-0.431221	0.686403	-0.628233	0.529851	NA
AADACL3	1.23776	-1.18878	0.667479	-1.78101	0.0749114	NA
AADAT	761.141	0.643216	0.103146	6.236	4.48911e-10	3.76028e-09
AAED1	130.3	0.422519	0.203806	2.07315	0.0381588	0.0909343
AAGAB	2456.44	0.308752	0.0916326	3.36945	0.000753175	0.00280339
AAK1	601.487	-0.0942946	0.110998	-0.849514	0.395595	0.575374
AAMDC	104.336	0.209802	0.209328	1.00227	0.316215	0.490194
AAMP	2960.68	-0.236802	0.0894348	-2.64777	0.00810252	0.0237251
AANAT	7.56193	-0.0561891	0.608139	-0.0923952	0.926384	0.964456
AAR2	1415.03	0.00776111	0.0872214	0.0889817	0.929096	0.965751
AARD	60.5964	-0.319374	0.263645	-1.21138	0.225751	0.383151
AARS	5821.96	-0.291061	0.0749588	-3.88295	0.000103196	0.000452465
AARS2	1406.94	0.144101	0.0894059	1.61176	0.107014	0.213639
AARSD1	64.804	-0.282178	0.262805	-1.07372	0.28295	0.452984
AASDH	430.685	-0.178406	0.130478	-1.36733	0.171521	0.311191
AASDHPPT	1506.22	0.166061	0.106985	1.55219	0.120617	0.235181
AASS	1593.74	0.212185	0.11353	1.86898	0.0616263	0.135878
AATBC	7.51595	0.0472054	0.619489	0.0762006	0.939259	0.971328
AATF	1872.43	0.0101932	0.0901242	0.113102	0.909949	0.955645
AATK	96.538	-0.0456361	0.220057	-0.207383	0.83571	0.912572
AATK-AS1	3.4271	-0.573309	0.710585	-0.806813	0.419774	0.59917
AB019441.29	5.08326	0.0269867	0.647557	0.0416746	0.966758	0.984093
ABALON	25.5909	1.06289	0.390765	2.72002	0.00652782	0.019611
ABAT	203.325	-0.0710928	0.161361	-0.440583	0.659515	0.801046
ABBA01000934.1	0.361203	-0.278417	0.486735	-0.57201	0.567315	NA
ABC11-4932300O16.1	0.612026	-0.344653	0.552752	-0.623521	0.532942	NA
ABC13-47488600E17.1	2.50088	-0.0703431	0.715585	-0.0983015	0.921693	0.961776
ABC7-42404400C24.1	3.80425	0.283423	0.682361	0.415356	0.677881	0.814322
ABC7-481722F1.1	0.342724	-0.22978	0.449022	-0.511735	0.608837	NA
ABCA1	915.505	-3.18733	0.168695	-18.894	1.27769e-79	1.06985e-77
ABCA10	3.35396	0.460761	0.703531	0.654926	0.512516	0.684404
ABCA11P	42.5522	-0.0830264	0.318481	-0.260695	0.794328	0.888095
ABCA12	4.06423	1.52143	0.700814	2.17095	0.029935	0.0738912
ABCA13	7.02954	1.30841	0.616928	2.12085	0.0339345	0.082159
ABCA17P	8.38362	0.238357	0.570941	0.417482	0.676326	0.81313
ABCA2	481.034	0.431268	0.126681	3.40436	0.000663202	0.00249978
ABCA3	230.012	-0.166166	0.401197	-0.414176	0.678745	0.814634
ABCA4	12.0443	1.12293	0.525767	2.13579	0.0326969	0.0796477
ABCA5	53.9187	1.09025	0.288368	3.78075	0.000156358	0.000663343
ABCA6	0.565238	0.513779	0.547716	0.938037	0.348225	NA
ABCA7	301.355	-0.591922	0.145873	-4.05778	4.95412e-05	0.000229938
ABCA8	0.951602	-0.117004	0.658973	-0.177554	0.859073	NA
ABCA9	16.365	3.40217	0.571676	5.95121	2.6617e-09	2.07502e-08
ABCA9-AS1	5.42056	0.904741	0.653644	1.38415	0.166313	0.30374
ABCB1	79.1691	2.8176	0.293822	9.58949	8.85255e-22	1.56236e-20
ABCB10	657.964	0.83252	0.123175	6.75882	1.39121e-11	1.32879e-10
ABCB10P1	4.91581	-0.710087	0.660807	-1.07458	0.282565	0.452648
ABCB10P3	0.274238	-0.0308478	0.450934	-0.0684086	0.94546	NA
ABCB10P4	0.765404	-0.276735	0.582866	-0.474783	0.634942	NA
ABCB11	1.43826	0.549614	0.683965	0.803571	0.421645	0.600778
ABCB4	119.933	2.68844	0.246978	10.8853	1.35383e-27	3.00957e-26
ABCB5	2.79986	1.14969	0.714193	1.60977	0.107448	0.214403
ABCB6	103.95	-0.167868	0.209015	-0.803137	0.421896	0.601022
ABCB7	1015.43	-0.24386	0.0942794	-2.58656	0.0096938	0.0278083
ABCB8	720.528	0.0445368	0.128203	0.347394	0.728295	0.846336
ABCB9	95.3476	0.424958	0.233552	1.81954	0.0688286	0.148935
ABCC1	2272.79	-0.151299	0.0881092	-1.71718	0.0859465	0.178806
ABCC10	686.917	0.238995	0.110024	2.17221	0.0298396	0.0737042
ABCC11	6.12406	-0.511314	0.627598	-0.814716	0.415235	0.594304
ABCC12	1.70765	-0.61123	0.712766	-0.857547	0.391143	0.57058
ABCC2	20.3947	-0.430961	0.444327	-0.969917	0.332088	0.508441
ABCC3	13.7676	-1.68081	0.511091	-3.28866	0.00100664	0.00366063
ABCC4	550.134	0.550823	0.158008	3.48605	0.000490211	0.00189124
ABCC5	2703.73	0.0509908	0.0760864	0.67017	0.50275	0.676351
ABCC6	24.8886	1.15691	0.404858	2.85756	0.00426917	0.0133996
ABCC6P1	7.36826	1.35283	0.619335	2.18432	0.0289389	0.0717853
ABCC6P2	4.16588	0.448901	0.681381	0.65881	0.510017	0.682236
ABCC8	26.9056	0.0552743	0.373692	0.147914	0.882411	0.941607
ABCC9	112.893	-0.674975	0.213272	-3.16485	0.00155164	0.00540932
ABCD1	209.055	-0.688173	0.211569	-3.25271	0.0011431	0.00410537
ABCD2	9.39759	3.03108	0.645844	4.69321	2.68952e-06	1.50432e-05
ABCD3	1276.36	0.10227	0.111731	0.915323	0.360022	0.538925
ABCD4	1587.64	-0.0427975	0.085594	-0.500006	0.617071	0.771165
ABCE1	5354.44	-0.098595	0.0802854	-1.22806	0.219426	0.375362
ABCF1	5779.63	-0.0850578	0.0690938	-1.23105	0.218305	0.373897
ABCF2	2795.26	0.00608914	0.0760443	0.0800736	0.936179	0.969604
ABCF3	1359.72	-0.178231	0.0887191	-2.00894	0.0445439	0.10368
ABCG1	323.793	1.37396	0.421469	3.25993	0.0011144	0.00401314
ABCG2	77.9536	3.59016	0.334241	10.7412	6.51815e-27	1.41694e-25
ABCG4	10.7216	-1.35613	0.579121	-2.34171	0.0191958	0.0504186
ABCG5	2.90355	0.374124	0.713249	0.524534	0.599907	0.758018
ABHD1	7.26481	-1.42931	0.630246	-2.26786	0.0233377	0.0597528
ABHD10	990.094	0.401516	0.113974	3.52287	0.000426895	0.00166343
ABHD11	371.729	-0.407129	0.133494	-3.04979	0.00229004	0.0076701
ABHD11-AS1	3.91595	1.44857	0.707036	2.04879	0.0404829	0.095636
ABHD12	1247.31	-0.0484286	0.0889035	-0.544732	0.585938	0.74664
ABHD12B	31.0932	-2.28665	0.394374	-5.79817	6.70405e-09	5.04544e-08
ABHD13	684.08	0.189195	0.133998	1.41193	0.157971	0.291377
ABHD14A	47.6358	1.50103	0.323467	4.64045	3.47657e-06	1.91004e-05
ABHD14B	128.996	0.247218	0.197753	1.25013	0.21125	0.364715
ABHD15	31.466	0.294957	0.352423	0.83694	0.402626	0.581709
ABHD16A	53.8497	0.66663	0.307624	2.16703	0.0302326	0.0745446
ABHD17A	1117.57	0.235559	0.107996	2.18119	0.0291695	0.0722543
ABHD17AP1	0.926377	0.156733	0.649928	0.241154	0.809435	NA
ABHD17AP3	0.367242	0.0469513	0.489439	0.0959287	0.923577	NA
ABHD17AP6	0.361203	-0.278417	0.486735	-0.57201	0.567315	NA
ABHD17B	1119.35	-0.149152	0.0893255	-1.66975	0.0949681	0.193864
ABHD17C	588.802	-0.401636	0.122791	-3.27089	0.00107209	0.0038737
ABHD18	366.317	-0.329678	0.137062	-2.40533	0.016158	0.0434948
ABHD2	1182.83	-0.0595315	0.093423	-0.637225	0.523978	0.694053
ABHD3	266.702	1.04435	0.183846	5.68059	1.34229e-08	9.8272e-08
ABHD4	1355	-1.09838	0.121534	-9.03763	1.60101e-19	2.54899e-18
ABHD5	349.395	-0.410285	0.137569	-2.9824	0.00285997	0.00934908
ABHD6	186.156	0.69674	0.200196	3.48029	0.000500866	0.00192873
ABHD8	184.479	-0.783013	0.192239	-4.07312	4.63876e-05	0.000216456
ABI1	1082.85	-0.0345734	0.0968113	-0.357121	0.721001	0.842565
ABI2	4988.96	0.198239	0.0840048	2.35986	0.0182819	0.0483695
ABI3	68.2354	-0.513979	0.275304	-1.86695	0.0619079	0.136348
ABI3BP	8.34776	0.847621	0.580052	1.46128	0.143938	0.27057
ABL1	4527.28	0.0158998	0.089227	0.178194	0.85857	0.927427
ABL2	1392.96	0.532696	0.0985511	5.40528	6.47082e-08	4.41038e-07
ABLIM1	4257.27	1.06381	0.108385	9.81512	9.69236e-23	1.78878e-21
ABLIM2	22.4358	-1.38532	0.427862	-3.23778	0.00120465	0.00430111
ABLIM3	12.0741	0.091287	0.514545	0.177413	0.859184	0.92772
ABO	3.42154	-0.958009	0.705465	-1.35798	0.174469	0.315099
ABR	1789.35	0.270439	0.0913311	2.96109	0.00306553	0.00993059
ABRA	0.447715	0.105726	0.545349	0.193869	0.846278	NA
ABRACL	1622.54	-0.875157	0.108378	-8.07503	6.74628e-16	8.75545e-15
ABT1	1021.71	0.261921	0.0940644	2.78448	0.00536136	0.0164575
ABTB1	134.032	-0.0672909	0.231606	-0.29054	0.771403	0.874005
ABTB2	443.386	-1.32262	0.437232	-3.02499	0.00248645	0.00825215
AC000068.10	1.35138	-0.346324	0.698858	-0.495556	0.620207	NA
AC000068.5	18.0152	0.245403	0.443677	0.553113	0.580186	0.741808
AC000078.5	0.923223	-0.4793	0.656121	-0.730506	0.465081	NA
AC000089.3	0.733382	-0.319326	0.629259	-0.507465	0.611829	NA
AC000095.11	0.344839	-0.0174862	0.481	-0.0363538	0.971	NA
AC000095.12	1.17616	-0.185206	0.69304	-0.267237	0.789287	NA
AC000120.7	2.90711	0.210835	0.714467	0.295094	0.767922	0.871808
AC000123.2	23.086	0.449305	0.443684	1.01267	0.311219	0.485047
AC000123.3	1.93439	0.666444	0.71667	0.929917	0.352414	0.530429
AC000123.4	4.53546	0.761746	0.680655	1.11914	0.263082	0.429627
AC000367.1	0.361203	-0.278417	0.486735	-0.57201	0.567315	NA
AC000403.4	2.2648	0.331888	0.71501	0.464173	0.642524	0.78912
AC001226.7	2.31794	0.334098	0.714963	0.467294	0.64029	0.787663
AC002056.3	0.487523	0.110007	0.553908	0.198601	0.842575	NA
AC002059.10	1.00866	-0.0568472	0.676346	-0.0840505	0.933016	NA
AC002064.4	3.60944	0.186828	0.685415	0.272577	0.785179	0.882477
AC002064.5	0.461258	0.10741	0.548755	0.195735	0.844818	NA
AC002076.10	0.825283	-0.637532	0.64165	-0.993581	0.320427	NA
AC002115.9	0.930302	0.233056	0.671571	0.34703	0.728568	NA
AC002116.7	8.86123	0.346981	0.577819	0.600502	0.548172	0.714751
AC002117.1	1.12014	0.0435824	0.696157	0.0626043	0.950082	NA
AC002128.5	4.64666	0.600878	0.67168	0.89459	0.371006	0.549726
AC002310.12	32.8808	-0.450756	0.353378	-1.27556	0.20211	0.35219
AC002310.14	49.4358	0.432876	0.302789	1.42963	0.152824	0.284062
AC002310.17	2.79958	-0.97216	0.71112	-1.36708	0.171599	0.311307
AC002310.7	0.674542	0.312043	0.615227	0.5072	0.612015	NA
AC002331.1	1.59896	-1.47037	0.692804	-2.12234	0.0338088	0.0819065
AC002368.4	0.46408	-0.226159	0.547424	-0.413134	0.679509	NA
AC002398.11	0.689677	-0.00587537	0.56868	-0.0103316	0.991757	NA
AC002398.13	3.35972	0.452345	0.693475	0.652288	0.514215	0.685549
AC002400.1	0.600045	0.499309	0.548676	0.910026	0.362809	NA
AC002454.1	9.70326	1.56611	0.575335	2.72208	0.00648725	0.0195084
AC002456.2	12.175	0.759142	0.522543	1.45278	0.146284	0.274098
AC002467.7	34.7373	0.0427513	0.360617	0.11855	0.905632	0.953723
AC002480.2	0.869347	0.500295	0.644691	0.776024	0.437735	NA
AC002480.3	15.1168	1.37096	0.490796	2.79334	0.00521674	0.0160594
AC002480.4	2.92047	-0.185684	0.705397	-0.263233	0.792371	0.886784
AC002480.5	0.346953	0.20087	0.449737	0.446639	0.655136	NA
AC002486.3	2.6489	-0.320776	0.709101	-0.452369	0.651003	0.794659
AC002519.6	0.369357	0.301098	0.492972	0.61078	0.541345	NA
AC002519.8	1.03106	-0.00428553	0.667976	-0.0064157	0.994881	NA
AC002550.5	0.519022	-0.462307	0.534635	-0.864715	0.387195	NA
AC002550.6	6.39663	-0.100693	0.627475	-0.160473	0.872509	0.936064
AC003002.6	2.14345	0.272086	0.716289	0.379855	0.704053	0.832186
AC003003.5	2.32757	-0.0375547	0.716813	-0.0523912	0.958217	0.979977
AC003005.2	3.08144	0.104586	0.705676	0.148207	0.88218	0.94156
AC003088.1	0.484701	0.450403	0.555542	0.810745	0.417512	NA
AC003090.1	1.24691	-0.185567	0.681895	-0.272134	0.785519	NA
AC003092.1	1.03161	0.892233	0.624872	1.42786	0.153331	NA
AC003104.1	3.99798	0.0240036	0.673196	0.0356562	0.971556	0.986657
AC003682.17	0.523252	0.146691	0.531075	0.276215	0.782383	NA
AC003956.1	12.7695	-0.508013	0.499566	-1.01691	0.309197	0.482872
AC003986.6	1.06734	1.05161	0.653991	1.60799	0.107838	NA
AC003991.3	8.64036	-0.115387	0.575149	-0.200621	0.840995	0.915758
AC004009.2	0.409165	0.318765	0.505027	0.631183	0.527921	NA
AC004009.3	0.605045	0.546341	0.555605	0.983326	0.325447	NA
AC004012.1	0.369357	0.301098	0.492972	0.61078	0.541345	NA
AC004019.10	0.311225	0.195823	0.467838	0.41857	0.67553	NA
AC004019.13	2.13205	-1.1639	0.716365	-1.62472	0.104221	0.209239
AC004051.2	0.369357	0.301098	0.492972	0.61078	0.541345	NA
AC004053.1	1.81439	-0.460602	0.70484	-0.653484	0.513444	0.68509
AC004057.1	0.379682	-0.238403	0.456131	-0.522665	0.601208	NA
AC004067.5	8.74292	0.0449769	0.557803	0.0806322	0.935734	0.969261
AC004069.2	2.70421	-0.0525526	0.712916	-0.0737151	0.941237	0.971932
AC004076.5	16.1991	-0.450029	0.482165	-0.933351	0.350639	0.528448
AC004076.7	0.888379	-0.1265	0.653993	-0.193428	0.846624	NA
AC004076.9	1.05692	0.027225	0.652452	0.0417272	0.966716	NA
AC004112.4	2.04441	-0.101244	0.716535	-0.141296	0.887636	0.943895
AC004156.3	3.29414	-0.391123	0.699724	-0.558968	0.576183	0.738703
AC004158.1	0.372179	0.0473982	0.491186	0.0964973	0.923126	NA
AC004160.4	0.195881	0.165172	0.449234	0.367675	0.713115	NA
AC004221.2	3.73815	0.0543076	0.693359	0.0783254	0.937569	0.970195
AC004237.1	5.63893	0.199086	0.64406	0.309111	0.757237	0.865852
AC004381.6	208.493	0.188231	0.164421	1.14481	0.252288	0.417041
AC004381.8	0.403125	-0.0196102	0.500339	-0.0391938	0.968736	NA
AC004383.3	3.68419	0.0783066	0.689	0.113652	0.909513	0.955595
AC004448.2	0.792708	0.0238482	0.60942	0.0391326	0.968785	NA
AC004448.5	0.886265	-0.414378	0.630872	-0.656834	0.511288	NA
AC004449.6	5.8456	-0.0336587	0.637692	-0.0527821	0.957906	0.979767
AC004453.8	1.10556	-0.228743	0.674926	-0.338916	0.734673	NA
AC004471.10	3.21238	-0.866351	0.700422	-1.2369	0.216124	0.371174
AC004471.9	7.67938	0.799974	0.590056	1.35576	0.175176	0.316127
AC004490.1	0.612026	-0.344653	0.552752	-0.623521	0.532942	NA
AC004538.3	8.18487	1.1757	0.599052	1.9626	0.0496924	0.113525
AC004540.4	15.2479	1.24146	0.479199	2.59069	0.00957838	0.0275196
AC004540.5	31.247	0.199406	0.358079	0.556877	0.577611	0.739657
AC004543.2	0.271417	0.179517	0.450331	0.398633	0.690163	NA
AC004623.3	5.71931	-1.09954	0.6404	-1.71695	0.0859879	0.178859
AC004637.1	0.274238	-0.0308478	0.450934	-0.0684086	0.94546	NA
AC004754.3	1.42251	0.240311	0.701506	0.342565	0.731926	0.84854
AC004813.1	15.7324	-0.0925351	0.460312	-0.201027	0.840678	0.915557
AC004837.5	0.808918	-0.276427	0.655966	-0.421405	0.673459	NA
AC004840.8	0.925338	-0.148543	0.657001	-0.226093	0.821129	NA
AC004854.4	1.46287	-0.261331	0.710319	-0.367906	0.712943	0.837746
AC004878.2	1.22951	-0.161255	0.684494	-0.235582	0.813757	NA
AC004878.8	0.363318	-0.0182109	0.487846	-0.0373292	0.970223	NA
AC004893.10	0.735497	0.0263626	0.631213	0.041765	0.966686	NA
AC004893.11	35.3067	0.109737	0.338025	0.324642	0.745452	0.858585
AC004895.4	1.06734	1.05161	0.653991	1.60799	0.107838	NA
AC004920.3	0.386761	0.248891	0.493536	0.504303	0.614049	NA
AC004951.5	5.94975	0.445711	0.635929	0.700882	0.483377	0.659755
AC004951.6	35.5563	0.999221	0.367045	2.72234	0.00648208	0.0194954
AC004967.7	28.1481	-0.29611	0.383589	-0.771946	0.440147	0.619449
AC004980.10	1.10878	0.389978	0.6733	0.579204	0.562452	NA
AC004980.7	81.8661	0.014706	0.233392	0.0630097	0.949759	0.976164
AC004985.12	1.50463	0.0992316	0.698843	0.141994	0.887085	0.94367
AC004987.9	1.42815	-0.346513	0.702374	-0.493345	0.621769	0.77436
AC005009.1	1.82135	1.20294	0.710289	1.6936	0.090342	0.186236
AC005009.2	2.05311	1.29998	0.713846	1.82109	0.0685925	0.148524
AC005013.5	0.507105	0.43737	0.532961	0.820642	0.41185	NA
AC005014.5	0.4456	-0.221493	0.54357	-0.407478	0.683657	NA
AC005042.2	0.898252	-0.120899	0.632535	-0.191135	0.84842	NA
AC005042.4	6.83723	0.0440474	0.632359	0.0696557	0.944468	0.973507
AC005062.2	11.4988	0.47656	0.516623	0.922453	0.356292	0.534758
AC005076.5	31.2174	0.310772	0.358043	0.867972	0.385409	0.56419
AC005077.14	61.6931	0.418195	0.29075	1.43833	0.15034	0.280414
AC005077.7	7.68373	0.450344	0.591523	0.761329	0.44646	0.625028
AC005077.8	1.34054	0.557693	0.698808	0.798063	0.424834	NA
AC005083.1	33.4988	0.129392	0.445587	0.290385	0.771521	0.874091
AC005104.3	17.4311	0.00797527	0.449226	0.0177534	0.985836	0.993011
AC005152.3	13.2274	2.47888	0.588805	4.21001	2.55355e-05	0.000124055
AC005154.6	201.641	0.451899	0.160634	2.81322	0.00490488	0.0151862
AC005154.7	0.948781	0.220276	0.672743	0.32743	0.743342	NA
AC005162.4	0.389582	-0.019106	0.495944	-0.0385246	0.969269	NA
AC005197.2	6.18682	-0.112083	0.623371	-0.179801	0.857309	0.926572
AC005220.3	0.914362	-0.514569	0.631406	-0.814957	0.415097	NA
AC005224.2	30.7416	0.242956	0.374638	0.648508	0.516656	0.687687
AC005251.3	3.00127	-0.319248	0.704388	-0.453228	0.650385	0.794287
AC005253.2	29.9382	-0.586613	0.368497	-1.59191	0.111405	0.220759
AC005256.1	0.484701	0.450403	0.555542	0.810745	0.417512	NA
AC005276.1	39.5125	-1.82371	0.356559	-5.11476	3.14134e-07	1.98767e-06
AC005300.5	0.287781	-0.0318243	0.457416	-0.0695741	0.944533	NA
AC005301.9	19.6329	-2.05768	0.462085	-4.45302	8.46698e-06	4.40454e-05
AC005306.3	0.674542	0.312043	0.615227	0.5072	0.612015	NA
AC005307.1	17.8563	-2.02402	0.472751	-4.28136	1.85754e-05	9.22364e-05
AC005307.3	8.58162	-0.444243	0.583629	-0.761173	0.446554	0.625081
AC005307.4	0.349775	-0.0176811	0.482868	-0.0366169	0.97079	NA
AC005307.5	23.1864	-0.995915	0.478503	-2.08131	0.0374051	0.0894399
AC005324.6	0.754003	0.428807	0.632674	0.677769	0.497918	NA
AC005329.7	10.5007	1.65294	0.596202	2.77245	0.00556356	0.0170158
AC005330.2	6.42308	0.0353004	0.625505	0.056435	0.954995	0.978675
AC005355.1	5.73732	-2.585	0.683795	-3.78037	0.000156595	0.00066412
AC005355.2	1.04298	-0.927912	0.628932	-1.47538	0.140111	NA
AC005355.3	1.06201	-0.0420164	0.679062	-0.0618742	0.950663	NA
AC005363.11	1.45849	0.295689	0.69514	0.425366	0.67057	0.809323
AC005387.2	3.2346	-0.591603	0.700823	-0.844156	0.398582	0.578202
AC005387.3	7.60464	-0.95867	0.604557	-1.58574	0.112798	0.223051
AC005391.2	2.74135	0.127172	0.70685	0.179913	0.857221	0.926572
AC005394.1	2.0923	-0.520308	0.716367	-0.726315	0.467646	0.644753
AC005487.2	0.346953	0.20087	0.449737	0.446639	0.655136	NA
AC005517.3	1.33168	0.492678	0.691692	0.712279	0.476292	NA
AC005519.4	58.9734	-0.513591	0.274145	-1.87343	0.0610096	0.13475
AC005523.3	1.19639	-0.558543	0.692292	-0.806802	0.419781	NA
AC005532.5	1.11306	-0.619848	0.673419	-0.920449	0.357338	NA
AC005534.6	0.653948	-0.041873	0.590135	-0.0709549	0.943434	NA
AC005534.8	0.830615	0.438371	0.627346	0.698771	0.484695	NA
AC005537.2	1.85242	-0.53352	0.716402	-0.744722	0.45644	0.634558
AC005540.3	1.00372	-0.0537804	0.676068	-0.0795488	0.936596	NA
AC005546.2	2.52518	0.17431	0.715317	0.243682	0.807477	0.895445
AC005562.1	15.3148	-0.563452	0.471731	-1.19443	0.232308	0.391825
AC005578.3	0.754003	0.428807	0.632674	0.677769	0.497918	NA
AC005592.1	3.94816	-0.479743	0.680724	-0.704754	0.480963	0.657692
AC005592.2	21.1236	0.568545	0.440411	1.29094	0.196724	0.34469
AC005592.3	1.91987	-0.948869	0.712917	-1.33097	0.1832	0.327361
AC005593.2	1.28345	0.820467	0.686106	1.19583	0.231762	NA
AC005609.16	1.19197	0.036728	0.661059	0.0555594	0.955693	NA
AC005614.3	2.19977	0.522219	0.71663	0.728715	0.466176	0.643504
AC005616.1	1.95533	-0.135185	0.716879	-0.188574	0.850426	0.921513
AC005618.6	9.49904	0.230415	0.544147	0.423443	0.671972	0.810237
AC005624.2	2.23535	0.0635625	0.715159	0.0888788	0.929178	0.965751
AC005682.5	62.8635	-2.19546	0.305379	-7.1893	6.51229e-13	6.9448e-12
AC005682.6	3.69757	-0.902185	0.696882	-1.2946	0.195457	0.343057
AC005740.3	0.898704	-0.921114	0.634493	-1.45173	0.146576	NA
AC005740.6	3.35479	0.449916	0.695832	0.646587	0.517899	0.688751
AC005753.1	2.20479	-0.475361	0.716353	-0.663585	0.506956	0.679727
AC005754.8	1.97944	0.138809	0.712459	0.194832	0.845525	0.918402
AC005757.6	0.386761	0.248891	0.493536	0.504303	0.614049	NA
AC005772.2	1.01203	0.555236	0.644474	0.861533	0.388944	NA
AC005775.2	3.3887	0.592902	0.708068	0.837352	0.402395	0.58156
AC005776.1	0.975046	0.214417	0.642844	0.333545	0.738723	NA
AC005785.2	10.1845	0.0648291	0.542833	0.119427	0.904937	0.953468
AC005785.5	5.0013	0.000771476	0.662276	0.00116489	0.999071	0.999513
AC005795.1	0.653948	-0.041873	0.590135	-0.0709549	0.943434	NA
AC005822.1	0.700807	0.314227	0.596604	0.526692	0.598407	NA
AC005863.1	2.74168	-1.96011	0.713495	-2.74719	0.00601076	0.0182062
AC005932.1	2.23668	0.108075	0.716822	0.15077	0.880157	0.940604
AC005954.3	1.72034	-0.920232	0.711079	-1.29413	0.195619	0.343286
AC005954.4	0.738318	-0.295274	0.608144	-0.485532	0.627299	NA
AC006000.5	0.905783	-0.155469	0.648723	-0.239654	0.810599	NA
AC006014.8	3.91638	0.900218	0.692475	1.3	0.193601	0.340776
AC006019.3	0.46408	-0.226159	0.547424	-0.413134	0.679509	NA
AC006026.1	0.719132	0.361384	0.607428	0.594941	0.551883	NA
AC006026.13	0.739357	0.00871678	0.602681	0.0144634	0.98846	NA
AC006042.6	2.32458	-1.12559	0.716601	-1.57074	0.116244	0.228585
AC006042.8	0.888379	-0.1265	0.653993	-0.193428	0.846624	NA
AC006077.3	9.09698	-0.694412	0.559602	-1.2409	0.214641	0.369525
AC006116.17	1.20711	-0.225756	0.691235	-0.326598	0.743972	NA
AC006116.19	0.379682	-0.238403	0.456131	-0.522665	0.601208	NA
AC006116.20	1.27622	0.205332	0.698174	0.294099	0.768682	NA
AC006116.22	0.386761	0.248891	0.493536	0.504303	0.614049	NA
AC006126.3	0.271417	0.179517	0.450331	0.398633	0.690163	NA
AC006128.2	69.6125	-0.138313	0.29926	-0.462184	0.64395	0.790113
AC006129.1	0.287781	-0.0318243	0.457416	-0.0695741	0.944533	NA
AC006129.2	7.00456	-0.65242	0.636399	-1.02517	0.305281	0.478842
AC006129.3	0.528895	-0.395645	0.500506	-0.790491	0.429241	NA
AC006145.4	0.389582	-0.019106	0.495944	-0.0385246	0.969269	NA
AC006160.5	3.26934	-0.263203	0.714137	-0.368561	0.712455	0.83739
AC006195.2	0.477623	-0.199529	0.520094	-0.38364	0.701245	NA
AC006262.6	0.563059	0.178616	0.567237	0.314888	0.752847	NA
AC006272.2	0.556008	-0.156311	0.539092	-0.289953	0.771852	NA
AC006273.4	1.03318	0.302008	0.668745	0.451604	0.651554	NA
AC006273.5	4.40221	0.211462	0.662699	0.319092	0.749657	0.86106
AC006277.2	0.983102	-0.783857	0.662346	-1.18345	0.236629	NA
AC006277.3	22.821	-0.292204	0.398157	-0.733892	0.463015	0.640509
AC006372.4	1.1673	-0.231918	0.678602	-0.341759	0.732532	NA
AC006378.2	5.33368	0.444602	0.65518	0.678595	0.497394	0.672272
AC006445.7	0.890648	0.127392	0.64689	0.19693	0.843883	NA
AC006460.2	0.539616	-0.189504	0.565479	-0.335121	0.737534	NA
AC006483.5	0.542438	-0.481719	0.540076	-0.891947	0.372421	NA
AC006486.10	9.2599	-0.23711	0.559029	-0.424147	0.671459	0.809877
AC006538.1	29.208	0.858351	0.372439	2.30467	0.0211849	0.0549757
AC006539.3	0.967288	0.596961	0.660288	0.904092	0.365947	NA
AC006547.13	28.4355	-0.0998203	0.372403	-0.268044	0.788666	0.884672
AC006548.28	173.761	-0.241703	0.168663	-1.43305	0.151844	0.2826
AC006552.1	0.274238	-0.0308478	0.450934	-0.0684086	0.94546	NA
AC006942.4	2.07713	-0.605252	0.716598	-0.844618	0.398324	0.578073
AC006946.12	0.582642	0.584186	0.580731	1.00595	0.31444	NA
AC006946.15	2.50998	0.706915	0.715848	0.987522	0.323387	0.49872
AC006946.16	29.7277	-0.272569	0.369803	-0.737067	0.461082	0.638617
AC006946.17	1.73711	-0.289788	0.715922	-0.404777	0.685642	0.819565
AC006960.5	0.386761	0.248891	0.493536	0.504303	0.614049	NA
AC006978.6	48.7314	-0.0885805	0.301162	-0.294129	0.768659	0.872206
AC006994.2	0.536795	0.14861	0.534181	0.278202	0.780857	NA
AC007000.10	0.766443	-0.00861572	0.606257	-0.0142113	0.988661	NA
AC007036.4	0.369357	0.301098	0.492972	0.61078	0.541345	NA
AC007038.7	8.18317	0.379692	0.582936	0.651345	0.514824	0.686068
AC007040.6	0.750079	0.331839	0.60462	0.548839	0.583116	NA
AC007041.2	0.311225	0.195823	0.467838	0.41857	0.67553	NA
AC007091.1	1.49391	1.31846	0.684378	1.92651	0.0540411	0.121726
AC007099.1	0.346953	0.20087	0.449737	0.446639	0.655136	NA
AC007128.1	9.62281	-0.0231493	0.559845	-0.0413495	0.967017	0.984146
AC007131.1	0.426569	0.221294	0.469202	0.471639	0.637184	NA
AC007131.2	1.5711	-1.1655	0.697608	-1.67071	0.0947787	0.193564
AC007161.5	0.195881	0.165172	0.449234	0.367675	0.713115	NA
AC007182.6	0.440664	-0.19132	0.510915	-0.374465	0.708058	NA
AC007191.4	136.427	-0.751155	0.193011	-3.89177	9.95152e-05	0.000437627
AC007193.10	1.04776	0.636972	0.666029	0.956373	0.338884	NA
AC007204.2	2.30869	0.838872	0.716879	1.17017	0.241932	0.404278
AC007228.9	41.3865	-0.46851	0.334285	-1.40153	0.161056	0.295933
AC007229.3	3.42295	-0.407205	0.702232	-0.579873	0.562	0.725999
AC007238.1	1.04494	0.992694	0.644606	1.54	0.12356	NA
AC007246.3	52.3803	-0.202815	0.288702	-0.702506	0.482364	0.658969
AC007249.3	8.08717	0.692422	0.585743	1.18213	0.237156	0.398258
AC007250.4	7.24539	-2.8837	0.661475	-4.3595	1.3036e-05	6.62883e-05
AC007253.1	0.361203	-0.278417	0.486735	-0.57201	0.567315	NA
AC007255.8	8.04998	-1.00742	0.603816	-1.66843	0.0952306	0.194347
AC007256.5	0.835183	-0.221845	0.642848	-0.345097	0.730022	NA
AC007277.3	96.6757	6.68569	0.558675	11.967	5.28826e-33	1.4132e-31
AC007279.2	3.12597	-0.0947174	0.703158	-0.134703	0.892847	0.945899
AC007285.6	1.34375	-0.429534	0.684501	-0.627514	0.530322	NA
AC007285.7	4.36903	0.860751	0.687381	1.25222	0.21049	0.363598
AC007292.3	6.99227	0.17586	0.594625	0.295749	0.767422	0.87159
AC007292.4	0.372179	0.0473982	0.491186	0.0964973	0.923126	NA
AC007292.6	29.1056	-0.76846	0.366465	-2.09695	0.0359977	0.0866244
AC007292.7	7.3159	-0.172128	0.604398	-0.284792	0.775803	0.877143
AC007318.5	0.850841	0.112386	0.659043	0.17053	0.864594	NA
AC007319.1	5.6979	-1.38583	0.679858	-2.03841	0.0415089	0.0977199
AC007326.9	0.714196	0.364873	0.606457	0.601647	0.547409	NA
AC007362.3	2.38327	-0.300459	0.714376	-0.42059	0.674055	0.811925
AC007365.3	3.19354	-0.125833	0.704511	-0.17861	0.858244	0.92714
AC007381.3	0.287781	-0.0318243	0.457416	-0.0695741	0.944533	NA
AC007383.3	36.5304	-1.95995	0.357189	-5.48714	4.08484e-08	2.84592e-07
AC007386.3	0.634735	0.257497	0.586714	0.43888	0.660748	NA
AC007386.4	1.46569	-0.548885	0.706149	-0.777294	0.436986	0.616305
AC007389.3	4.64026	-0.0204618	0.673609	-0.0303763	0.975767	0.988494
AC007390.4	0.361203	-0.278417	0.486735	-0.57201	0.567315	NA
AC007405.4	25.0672	3.5493	0.506968	7.00103	2.54089e-12	2.57367e-11
AC007405.6	123.014	2.46279	0.241722	10.1885	2.23187e-24	4.39531e-23
AC007405.8	32.7166	5.3016	0.606737	8.7379	2.37492e-18	3.52542e-17
AC007461.2	3.12149	2.14115	0.716813	2.98704	0.00281693	0.00922572
AC007463.2	4.30495	-2.71101	0.711554	-3.80999	0.000138974	0.000595064
AC007566.10	4.62392	0.140157	0.666838	0.210181	0.833527	0.911104
AC007682.1	17.9273	4.22059	0.615142	6.86116	6.83038e-12	6.6936e-11
AC007731.1	1.6516	-0.759091	0.70966	-1.06965	0.284775	0.455414
AC007743.1	93.5598	1.12001	0.25233	4.43866	9.05211e-06	4.68522e-05
AC007773.2	12.7864	-0.504086	0.513681	-0.981321	0.326434	0.50177
AC007796.1	1.44114	-1.36494	0.684527	-1.99399	0.046153	0.106828
AC007875.2	2.63269	-0.151808	0.710829	-0.213565	0.830886	0.909364
AC007879.2	1.72356	-0.267504	0.712529	-0.375429	0.707342	0.834397
AC007879.4	1.11215	0.950949	0.634862	1.49788	0.134164	NA
AC007879.5	1.06724	-0.639504	0.652616	-0.979908	0.327132	NA
AC007880.1	0.271417	0.179517	0.450331	0.398633	0.690163	NA
AC007906.1	0.274238	-0.0308478	0.450934	-0.0684086	0.94546	NA
AC007950.2	2.82348	1.0745	0.713761	1.50541	0.132218	0.253213
AC007952.5	8.44034	0.584057	0.592088	0.986436	0.323919	0.499193
AC007966.1	2.28064	0.772083	0.716662	1.07733	0.281331	0.451248
AC007969.4	0.714196	0.364873	0.606457	0.601647	0.547409	NA
AC007969.5	20.1232	0.323953	0.43019	0.753046	0.451422	0.629713
AC008060.7	0.195881	0.165172	0.449234	0.367675	0.713115	NA
AC008073.7	0.386761	0.248891	0.493536	0.504303	0.614049	NA
AC008074.3	5.15308	-1.2759	0.662924	-1.92465	0.0542726	0.122166
AC008074.4	0.565881	-0.162049	0.541025	-0.299522	0.764542	NA
AC008074.5	0.827397	-0.266497	0.641637	-0.415339	0.677894	NA
AC008079.10	8.14094	0.574539	0.583361	0.984877	0.324685	0.499998
AC008079.9	0.592966	-0.178034	0.546269	-0.32591	0.744493	NA
AC008088.4	35.8085	-1.37169	0.386834	-3.54593	0.000391227	0.00153877
AC008132.13	0.361203	-0.278417	0.486735	-0.57201	0.567315	NA
AC008132.15	0.693907	0.520399	0.533356	0.975706	0.32921	NA
AC008154.4	0.293821	0.221843	0.45001	0.492973	0.622032	NA
AC008269.2	0.576602	0.180411	0.569753	0.316647	0.751511	NA
AC008440.10	1.3976	0.626095	0.703501	0.889969	0.373482	0.552236
AC008522.1	0.736536	0.341352	0.602126	0.566911	0.570775	NA
AC008592.3	3.62912	-0.545952	0.691651	-0.789345	0.42991	0.608846
AC008686.1	0.872169	0.139899	0.645282	0.216804	0.828361	NA
AC008697.1	3.48867	0.492903	0.701986	0.702155	0.482583	0.659161
AC008703.1	0.271417	0.179517	0.450331	0.398633	0.690163	NA
AC008746.12	2.20375	-0.74311	0.716644	-1.03693	0.299768	0.472737
AC008746.5	2.76372	0.347736	0.711103	0.48901	0.624835	0.776552
AC008753.6	2.72677	-0.0647207	0.708952	-0.0912907	0.927262	0.964888
AC008759.1	0.658178	0.651091	0.592719	1.09848	0.271994	NA
AC008781.7	2.09455	0.775494	0.716828	1.08184	0.279323	0.448982
AC008937.2	0.600045	0.499309	0.548676	0.910026	0.362809	NA
AC008937.3	4.24121	-0.0299898	0.675159	-0.0444189	0.96457	0.983006
AC008982.2	17.1823	-0.14884	0.457645	-0.32523	0.745007	0.858291
AC008985.1	2.39357	-1.11503	0.716877	-1.5554	0.11985	0.233906
AC008992.1	0.34766	-0.272253	0.482258	-0.564539	0.572387	NA
AC008993.2	71.9653	0.420666	0.263916	1.59394	0.11095	0.220051
AC009005.2	13.0578	0.144077	0.504785	0.285423	0.77532	0.87686
AC009014.3	12.8353	1.66752	0.706835	2.35914	0.0183176	0.0484355
AC009022.1	1.45824	0.242297	0.688593	0.351873	0.724933	0.844243
AC009060.2	3.47201	0.18358	0.698889	0.262674	0.792802	0.887017
AC009095.4	10.9166	-0.167638	0.538597	-0.31125	0.755611	0.865045
AC009120.11	1.56574	-0.161343	0.713841	-0.226021	0.821185	0.90356
AC009120.3	6.3214	0.329967	0.648432	0.50887	0.610843	0.766296
AC009120.4	0.361203	-0.278417	0.486735	-0.57201	0.567315	NA
AC009120.5	6.77366	0.963479	0.615637	1.56501	0.11758	0.230591
AC009120.6	57.4364	0.196917	0.297331	0.662281	0.507791	0.680345
AC009133.12	172.464	-0.278534	0.181497	-1.53464	0.124871	0.241889
AC009133.17	84.1403	-2.33906	0.253035	-9.24404	2.3737e-20	3.94013e-19
AC009158.1	0.34766	-0.272253	0.482258	-0.564539	0.572387	NA
AC009166.5	15.2828	2.28037	0.529732	4.30477	1.6716e-05	8.35724e-05
AC009166.7	15.2431	3.2971	0.582439	5.66086	1.50619e-08	1.09774e-07
AC009227.2	2.18645	0.539566	0.716238	0.753333	0.45125	0.629511
AC009245.3	3.32095	-0.0849927	0.712282	-0.119324	0.905018	0.953468
AC009262.2	1.99651	-0.568884	0.71598	-0.794553	0.426874	0.605747
AC009264.1	1.52501	-0.227807	0.693891	-0.328304	0.742682	0.856553
AC009299.2	0.988434	0.284983	0.665827	0.428014	0.668641	NA
AC009299.3	8.5342	-2.44317	0.620029	-3.94041	8.13417e-05	0.000363433
AC009303.1	0.622449	0.546849	0.559205	0.977904	0.328122	NA
AC009303.2	17.9031	0.250883	0.438669	0.571919	0.567377	0.731277
AC009312.1	10.5553	0.375975	0.533783	0.70436	0.481208	0.657883
AC009336.19	46.5395	5.6392	0.601203	9.37986	6.6058e-21	1.12715e-19
AC009403.2	52.652	-0.659196	0.286214	-2.30315	0.0212702	0.0551779
AC009404.2	67.4609	0.28044	0.251683	1.11426	0.265169	0.432036
AC009410.1	0.384646	-0.0189206	0.494297	-0.0382778	0.969466	NA
AC009473.1	1.48846	0.0792452	0.705146	0.112381	0.910521	0.955933
AC009487.6	7.85191	0.866947	0.592365	1.46353	0.143321	0.269613
AC009495.4	0.287781	-0.0318243	0.457416	-0.0695741	0.944533	NA
AC009498.1	1.17028	1.09868	0.658887	1.66748	0.0954184	NA
AC009501.4	14.3629	-0.933157	0.512949	-1.8192	0.0688807	0.149034
AC009502.4	0.34766	-0.272253	0.482258	-0.564539	0.572387	NA
AC009505.2	0.271417	0.179517	0.450331	0.398633	0.690163	NA
AC009506.1	27.2917	-0.443759	0.390999	-1.13493	0.256403	0.422104
AC009542.2	1.55796	-0.187747	0.708748	-0.264899	0.791088	0.885883
AC009948.5	256.046	1.04954	0.172724	6.07643	1.2289e-09	9.90478e-09
AC009948.7	4.80112	0.445278	0.682475	0.652446	0.514113	0.685525
AC009950.2	2.15745	-0.489761	0.716878	-0.683186	0.494489	0.669682
AC009955.8	0.840119	-0.198928	0.620277	-0.320708	0.748431	NA
AC009961.3	12.4629	-0.537357	0.513968	-1.04551	0.295789	0.468389
AC009963.3	0.619077	-0.0747594	0.60782	-0.122996	0.90211	NA
AC009967.3	0.545655	0.208925	0.570532	0.366193	0.714221	NA
AC010084.1	0.677364	-0.0645934	0.616397	-0.104792	0.916541	NA
AC010127.3	2.65864	1.03463	0.714635	1.44778	0.147679	0.276316
AC010132.10	0.34766	-0.272253	0.482258	-0.564539	0.572387	NA
AC010136.2	0.271417	0.179517	0.450331	0.398633	0.690163	NA
AC010148.1	8.78202	0.235979	0.55887	0.422242	0.672848	0.810818
AC010226.4	3.28942	0.0413604	0.701326	0.0589746	0.952972	0.977665
AC010287.1	0.311225	0.195823	0.467838	0.41857	0.67553	NA
AC010468.1	5.22989	0.257314	0.647777	0.397227	0.6912	0.823772
AC010492.2	0.366139	-0.280613	0.48831	-0.574661	0.565521	NA
AC010504.2	3.53625	-0.0576934	0.703577	-0.0820001	0.934647	0.968784
AC010524.2	4.63275	0.30842	0.658074	0.468671	0.639305	0.787223
AC010524.4	12.0828	0.0692569	0.522324	0.132594	0.894515	0.946896
AC010525.4	0.91127	0.868924	0.625433	1.38931	0.164737	NA
AC010641.1	1.31384	-0.141407	0.694299	-0.203669	0.838612	NA
AC010642.1	26.0156	0.953108	0.395539	2.40964	0.0159681	0.0430436
AC010642.2	4.98476	0.46993	0.663938	0.707792	0.479075	0.656061
AC010729.1	7.98779	0.463165	0.578048	0.801258	0.422982	0.601939
AC010729.2	19.7711	0.406083	0.439613	0.923729	0.355627	0.53414
AC010731.2	3.45383	-0.671587	0.70341	-0.954758	0.3397	0.516702
AC010733.5	2.75554	0.856633	0.710006	1.20652	0.227619	0.385729
AC010745.2	1.09952	-0.621645	0.675321	-0.920519	0.357302	NA
AC010745.4	0.680582	0.698784	0.599921	1.16479	0.244103	NA
AC010761.13	3.02053	0.0775168	0.703772	0.110145	0.912295	0.95688
AC010761.14	1.54457	-0.230253	0.699417	-0.329208	0.741999	0.85596
AC010761.8	107.805	-0.75746	0.235669	-3.21409	0.0013086	0.00463641
AC010761.9	9.30486	-0.062911	0.599179	-0.104995	0.916379	0.959259
AC010883.5	6.48674	-0.316065	0.652003	-0.48476	0.627847	0.778541
AC010884.1	4.39894	0.720285	0.669192	1.07635	0.281771	0.451632
AC010890.1	7.52336	0.694753	0.606904	1.14475	0.252313	0.417041
AC010894.3	7.82454	-0.32916	0.577757	-0.56972	0.568868	0.73236
AC010894.5	0.386761	0.248891	0.493536	0.504303	0.614049	NA
AC010900.2	2.23058	-0.204655	0.716758	-0.285529	0.775239	0.876812
AC010967.2	1.14092	-0.822728	0.65971	-1.24711	0.212359	NA
AC010974.3	0.389582	-0.019106	0.495944	-0.0385246	0.969269	NA
AC010975.1	0.269302	-0.0305832	0.449155	-0.0680904	0.945714	NA
AC010976.2	27.8803	0.0788935	0.368672	0.213994	0.830552	0.909303
AC010980.2	14.3964	3.92771	0.6302	6.23249	4.59082e-10	3.83978e-09
AC010983.1	0.311225	0.195823	0.467838	0.41857	0.67553	NA
AC011247.3	5.379	0.43207	0.65136	0.663336	0.507116	0.679843
AC011288.2	2.03665	0.151173	0.716355	0.211031	0.832863	0.910599
AC011290.4	0.712081	0.0363142	0.606172	0.0599074	0.952229	NA
AC011290.5	30.3992	-0.0587338	0.363878	-0.161411	0.87177	0.935582
AC011298.2	0.311225	0.195823	0.467838	0.41857	0.67553	NA
AC011330.13	12.001	-0.752786	0.517	-1.45607	0.145375	0.27284
AC011330.5	1.38166	-0.0516668	0.692722	-0.0745852	0.940545	0.97175
AC011551.3	0.403125	-0.0196102	0.500339	-0.0391938	0.968736	NA
AC011648.1	0.46408	-0.226159	0.547424	-0.413134	0.679509	NA
AC011738.4	6.16759	-2.11964	0.657553	-3.22352	0.00126625	0.00450044
AC011747.4	67.7416	-0.457099	0.251148	-1.82003	0.0687538	0.148816
AC011754.1	0.409165	0.318765	0.505027	0.631183	0.527921	NA
AC011899.9	0.945591	-0.112681	0.632964	-0.178021	0.858706	NA
AC011997.1	1.57272	-1.05748	0.699495	-1.51178	0.13059	0.250882
AC012074.2	13.0783	0.0540785	0.500537	0.108041	0.913963	0.957775
AC012123.1	9.85156	-1.13376	0.556795	-2.03622	0.0417282	0.0981268
AC012146.7	139.685	-0.620139	0.201129	-3.0833	0.00204722	0.00692668
AC012314.8	21.6035	-0.662001	0.436176	-1.51774	0.12908	0.248531
AC012322.1	0.946666	-0.12251	0.67283	-0.182081	0.855519	NA
AC012354.8	0.46408	-0.226159	0.547424	-0.413134	0.679509	NA
AC012358.4	8.96194	0.0726394	0.565201	0.12852	0.897738	0.948681
AC012358.7	7.79107	-0.0325485	0.586201	-0.0555246	0.955721	0.979062
AC012358.8	1.66154	-0.600105	0.705179	-0.850997	0.394771	0.57449
AC012360.4	0.918287	-0.437982	0.637218	-0.687334	0.491872	NA
AC012360.6	3.16458	-0.212059	0.702443	-0.301888	0.762737	0.868757
AC012368.1	2.29977	-0.903464	0.716878	-1.26028	0.20757	0.359625
AC012442.5	2.53128	0.495038	0.711669	0.695601	0.486679	0.663048
AC012442.6	2.34677	0.0717428	0.71624	0.100166	0.920213	0.960887
AC012454.4	0.195881	0.165172	0.449234	0.367675	0.713115	NA
AC012456.4	0.385722	0.0486105	0.495847	0.0980353	0.921904	NA
AC012462.1	0.95417	-0.486099	0.635771	-0.764583	0.44452	NA
AC012501.2	0.983652	0.228207	0.661251	0.345114	0.730009	NA
AC012501.3	1.57172	0.0993525	0.706502	0.140626	0.888165	0.943992
AC012506.2	0.537501	-0.548207	0.568481	-0.964336	0.334878	NA
AC012506.3	0.677364	-0.0645934	0.616397	-0.104792	0.916541	NA
AC012506.4	0.459143	-0.224249	0.546401	-0.410411	0.681504	NA
AC012507.3	1.2213	0.817177	0.684659	1.19355	0.232653	NA
AC012512.1	121.618	-1.76065	0.21336	-8.25202	1.55741e-16	2.08713e-15
AC012531.25	47.0531	5.67203	0.598888	9.47094	2.77333e-21	4.81563e-20
AC012594.1	0.789886	0.354373	0.609817	0.581114	0.561164	NA
AC013275.2	0.890098	-0.901261	0.630604	-1.4292	0.152946	NA
AC013460.1	5.3597	1.00998	0.650768	1.55198	0.120666	0.235256
AC013461.1	787.989	-0.550345	0.131259	-4.19281	2.75518e-05	0.000133324
AC013472.3	0.81833	0.74281	0.59559	1.24718	0.21233	NA
AC013472.4	0.311225	0.195823	0.467838	0.41857	0.67553	NA
AC013474.4	0.781344	0.413127	0.616273	0.670364	0.502626	NA
AC013480.2	0.877404	-0.493747	0.627561	-0.786771	0.431416	NA
AC015849.16	23.3356	0.218556	0.395266	0.552935	0.580308	0.741833
AC015849.19	13.7245	-0.657063	0.482564	-1.36161	0.173322	0.313452
AC015849.2	1.60757	-1.47385	0.693046	-2.12662	0.0334514	0.0811583
AC015922.7	0.274238	-0.0308478	0.450934	-0.0684086	0.94546	NA
AC015933.2	0.910231	0.48171	0.635797	0.757647	0.448662	NA
AC015971.2	3.62149	0.391737	0.69177	0.566281	0.571203	0.734278
AC016292.3	2.40733	0.436449	0.715134	0.610305	0.54166	0.709269
AC016582.2	1.17122	-0.171168	0.679328	-0.251967	0.801067	NA
AC016629.3	4.20135	0.435513	0.694051	0.627495	0.530335	0.699686
AC016644.1	0.638659	0.308998	0.591195	0.522667	0.601206	NA
AC016700.5	16.2708	0.59274	0.491862	1.20509	0.228167	0.386397
AC016708.2	1.70223	-0.299641	0.713368	-0.420037	0.674458	0.812022
AC016712.1	0.361203	-0.278417	0.486735	-0.57201	0.567315	NA
AC016722.3	0.311225	0.195823	0.467838	0.41857	0.67553	NA
AC016722.4	15.608	-0.15606	0.465109	-0.335534	0.737222	0.852408
AC016723.4	2.88722	-2.14335	0.716478	-2.99152	0.00277597	0.00909948
AC016734.2	1.08637	0.367757	0.674775	0.545006	0.585749	NA
AC016735.1	0.367242	0.0469513	0.489439	0.0959287	0.923577	NA
AC016735.2	1.01013	0.89798	0.625755	1.43503	0.151278	NA
AC016738.4	0.349775	-0.0176811	0.482868	-0.0366169	0.97079	NA
AC016739.2	1.73711	-0.289788	0.715922	-0.404777	0.685642	0.819565
AC016745.3	2.55479	-0.676028	0.714448	-0.946225	0.344034	0.521413
AC016747.3	90.9736	-0.352716	0.218667	-1.61303	0.106738	0.213232
AC016757.3	24.083	-0.192597	0.391363	-0.492118	0.622636	0.774927
AC016831.7	0.293821	0.221843	0.45001	0.492973	0.622032	NA
AC016907.3	0.624013	-0.0708775	0.584934	-0.121172	0.903555	NA
AC016910.1	0.369357	0.301098	0.492972	0.61078	0.541345	NA
AC016999.2	0.729457	-0.366954	0.604784	-0.606752	0.544016	NA
AC017002.1	0.287781	-0.0318243	0.457416	-0.0695741	0.944533	NA
AC017002.2	0.195881	0.165172	0.449234	0.367675	0.713115	NA
AC017002.4	0.563059	0.178616	0.567237	0.314888	0.752847	NA
AC017060.1	0.352596	-0.22978	0.449022	-0.511735	0.608837	NA
AC017074.2	2.44296	0.361529	0.716668	0.504458	0.61394	0.768972
AC017081.1	4.93585	0.625732	0.685823	0.912381	0.361568	0.54066
AC017083.2	0.366139	-0.280613	0.48831	-0.574661	0.565521	NA
AC017104.2	1.55688	-0.220476	0.71234	-0.309509	0.756934	0.865724
AC017104.6	7.00425	-0.130899	0.598215	-0.218816	0.826793	0.906813
AC018462.2	2.31586	-0.103189	0.716871	-0.143943	0.885545	0.943003
AC018641.7	10.6628	-0.0811941	0.540395	-0.150249	0.880568	0.940781
AC018647.3	0.271417	0.179517	0.450331	0.398633	0.690163	NA
AC018755.16	6.82822	-0.193009	0.623466	-0.309575	0.756884	0.865724
AC018755.17	0.884455	-0.191826	0.647145	-0.296419	0.76691	NA
AC018766.6	15.0775	0.0759407	0.482416	0.157418	0.874916	0.937801
AC018804.6	0.34766	-0.272253	0.482258	-0.564539	0.572387	NA
AC018816.3	0.195881	0.165172	0.449234	0.367675	0.713115	NA
AC018867.1	0.877404	-0.493747	0.627561	-0.786771	0.431416	NA
AC018890.6	2.81588	0.197327	0.707645	0.278851	0.780359	0.88005
AC018892.9	4.37651	0.37144	0.701024	0.529854	0.596213	0.755259
AC019048.1	0.442779	0.105102	0.544074	0.193177	0.846821	NA
AC019097.7	3.87647	0.0129824	0.687711	0.0188778	0.984939	0.992799
AC019118.3	0.708156	-0.0208502	0.598439	-0.0348409	0.972207	NA
AC019118.4	0.542834	0.482692	0.543563	0.888015	0.374533	NA
AC019172.2	0.484701	0.450403	0.555542	0.810745	0.417512	NA
AC019181.3	0.551044	-0.488721	0.542008	-0.901686	0.367224	NA
AC019330.1	0.409165	0.318765	0.505027	0.631183	0.527921	NA
AC020594.5	1.63261	-0.41525	0.698399	-0.594574	0.552128	0.717922
AC020915.2	4.65124	-0.882565	0.676863	-1.30391	0.192266	0.338981
AC020951.1	0.372179	0.0473982	0.491186	0.0964973	0.923126	NA
AC021106.1	4.15906	0.141613	0.680746	0.208026	0.835209	0.912282
AC021188.4	2.3753	-0.835217	0.716879	-1.16507	0.243989	0.406672
AC021876.4	0.342724	-0.22978	0.449022	-0.511735	0.608837	NA
AC022007.5	47.1998	0.215388	0.304292	0.707834	0.479048	0.656061
AC022153.1	1.45377	0.321109	0.703897	0.456187	0.648255	0.793017
AC022154.7	5.93621	0.18421	0.635333	0.289943	0.77186	0.874204
AC022182.1	1.7122	1.44128	0.693585	2.07801	0.037708	0.0900214
AC022182.2	1.10274	0.0663891	0.686771	0.0966684	0.92299	NA
AC022182.3	0.366139	-0.280613	0.48831	-0.574661	0.565521	NA
AC022210.2	0.651099	-0.0896811	0.589274	-0.152189	0.879038	NA
AC022816.2	0.344839	-0.0174862	0.481	-0.0363538	0.971	NA
AC022819.3	1.93786	-0.176064	0.716216	-0.245825	0.805818	0.894896
AC023115.2	0.542438	-0.481719	0.540076	-0.891947	0.372421	NA
AC023115.4	0.722406	-0.659246	0.580898	-1.13487	0.256428	NA
AC023271.1	0.269302	-0.0305832	0.449155	-0.0680904	0.945714	NA
AC023590.1	2.74337	-0.789321	0.710116	-1.11154	0.266337	0.433448
AC024060.1	3.78703	0.101091	0.687056	0.147136	0.883024	0.941692
AC024361.1	1.39597	1.2372	0.676364	1.8292	0.0673704	0.146397
AC024560.2	0.922516	0.154769	0.638012	0.24258	0.80833	NA
AC024560.3	563.3	0.22481	0.1069	2.103	0.0354661	0.0854634
AC024937.4	4.39994	0.0873012	0.667927	0.130705	0.896009	0.947871
AC024937.6	9.64542	-0.705238	0.551758	-1.27817	0.201191	0.351039
AC025016.1	0.384646	-0.0189206	0.494297	-0.0382778	0.969466	NA
AC025165.8	20.4859	0.41725	0.444988	0.937665	0.348416	0.525694
AC025171.1	0.714196	0.364873	0.606457	0.601647	0.547409	NA
AC025335.1	63.7064	0.594099	0.262864	2.2601	0.023815	0.0607205
AC025918.2	0.98028	-0.434876	0.675624	-0.643665	0.519792	NA
AC026150.8	0.990153	-0.403063	0.6601	-0.610609	0.541459	NA
AC026188.1	0.293821	0.221843	0.45001	0.492973	0.622032	NA
AC026202.3	1.95125	-0.118471	0.715392	-0.165603	0.868469	0.93368
AC026248.1	2.19621	-0.17469	0.711769	-0.24543	0.806123	0.894912
AC026271.5	3.04118	0.722584	0.709638	1.01824	0.308563	0.482286
AC026954.6	0.640378	-0.416188	0.588756	-0.706893	0.479633	NA
AC027124.2	0.379682	-0.238403	0.456131	-0.522665	0.601208	NA
AC027601.1	34.0295	-0.447603	0.361682	-1.23756	0.21588	0.370867
AC027612.1	2.89879	-1.34932	0.716872	-1.88223	0.0598048	0.132491
AC027612.4	56.4472	-2.57332	0.350626	-7.3392	2.14872e-13	2.35931e-12
AC027612.6	22.5851	0.782785	0.403922	1.93796	0.0526278	0.11904
AC034220.3	4.44122	-0.268953	0.668261	-0.402467	0.68734	0.820959
AC034228.3	0.773522	0.66986	0.582451	1.15007	0.250115	NA
AC034243.1	1.39493	0.88517	0.693086	1.27714	0.201552	0.351569
AC046143.3	16.6349	0.216469	0.48249	0.44865	0.653684	0.796727
AC053503.11	0.672428	-0.0611542	0.61571	-0.0993231	0.920882	NA
AC053503.4	5.17408	-0.101957	0.644264	-0.158253	0.874257	0.937495
AC053503.6	0.271417	0.179517	0.450331	0.398633	0.690163	NA
AC055866.1	1.53323	0.378948	0.6992	0.541974	0.587836	0.748225
AC060834.2	5.88295	1.00798	0.635491	1.58615	0.112706	0.222947
AC061961.2	1.53246	0.983977	0.699278	1.40713	0.159388	0.293536
AC061992.2	1.32245	-0.131301	0.684449	-0.191835	0.847871	NA
AC062017.1	3.08846	-0.681317	0.700504	-0.97261	0.330747	0.507049
AC062028.1	1.65657	-0.400569	0.708455	-0.565413	0.571793	0.734661
AC062029.1	30.499	-0.253929	0.378795	-0.67036	0.502628	0.676273
AC063976.7	0.870423	0.508324	0.650364	0.781598	0.434451	NA
AC064836.3	1.23392	-0.659686	0.668589	-0.986684	0.323798	NA
AC064850.4	1.64729	-0.0915809	0.705354	-0.129837	0.896695	0.948219
AC064875.2	4.08648	1.6186	0.692745	2.3365	0.0194651	0.0510399
AC067945.4	0.442779	0.105102	0.544074	0.193177	0.846821	NA
AC067968.3	1.70067	0.225962	0.715407	0.315851	0.752115	0.862525
AC067969.2	1.85119	-0.454195	0.713738	-0.63636	0.524541	0.694596
AC068057.1	5.18916	1.29054	0.664363	1.94252	0.052074	0.117977
AC068134.10	15.4552	0.164156	0.465944	0.352308	0.724607	0.844033
AC068138.1	0.426569	0.221294	0.469202	0.471639	0.637184	NA
AC068196.1	0.271417	0.179517	0.450331	0.398633	0.690163	NA
AC068279.3	3.40643	0.677503	0.69854	0.969885	0.332104	0.508441
AC068282.3	22.6525	1.00383	0.462594	2.17001	0.0300058	0.0740418
AC068499.10	2.24233	-0.659491	0.71685	-0.919984	0.357581	0.536229
AC068522.4	0.776343	0.363917	0.607443	0.599097	0.549108	NA
AC068535.2	0.582642	0.584186	0.580731	1.00595	0.31444	NA
AC068580.5	6.4939	-0.479619	0.619067	-0.774744	0.438491	0.61758
AC068580.6	12.6033	0.140936	0.505738	0.278675	0.780495	0.880159
AC068831.10	7.84378	0.574798	0.60031	0.957501	0.338314	0.514954
AC068831.16	1.67771	0.650033	0.700433	0.928044	0.353385	0.531417
AC068831.17	1.08488	-0.945858	0.631348	-1.49816	0.134093	NA
AC068831.6	6.88966	-0.860332	0.627297	-1.37149	0.170222	0.309429
AC069063.2	0.409165	0.318765	0.505027	0.631183	0.527921	NA
AC069154.4	1.97371	-1.70776	0.706327	-2.41781	0.0156144	0.0422412
AC069155.1	0.484701	0.450403	0.555542	0.810745	0.417512	NA
AC069257.6	2.01723	1.32151	0.713692	1.85166	0.0640747	0.140315
AC069257.8	1.02046	0.237042	0.650705	0.364285	0.715645	NA
AC069277.2	10.5538	-0.508992	0.537178	-0.947529	0.343369	0.520849
AC069282.6	34.3179	0.265931	0.370328	0.718097	0.472698	0.649611
AC069499.1	1.85901	0.555056	0.714081	0.7773	0.436982	0.616305
AC069513.4	7.60871	0.573154	0.597714	0.95891	0.337604	0.514184
AC072062.1	5.08	-0.299649	0.656453	-0.456467	0.648054	0.792814
AC073043.1	5.64892	-0.173024	0.645496	-0.268049	0.788662	0.884672
AC073046.25	21.4179	0.928939	0.427978	2.17053	0.0299668	0.0739537
AC073052.1	1.36337	-0.0504187	0.685537	-0.0735463	0.941371	NA
AC073063.10	0.612026	-0.344653	0.552752	-0.623521	0.532942	NA
AC073065.3	0.831322	-0.193829	0.645585	-0.300237	0.763996	NA
AC073069.2	0.487523	0.110007	0.553908	0.198601	0.842575	NA
AC073071.1	40.2141	0.93132	0.338744	2.74933	0.00597171	0.0181118
AC073072.7	0.344839	-0.0174862	0.481	-0.0363538	0.971	NA
AC073133.1	2.37818	0.585689	0.716855	0.817026	0.413913	0.593051
AC073133.2	0.274238	-0.0308478	0.450934	-0.0684086	0.94546	NA
AC073254.1	44.2967	-0.0566405	0.312428	-0.181291	0.856139	0.925972
AC073257.2	0.514086	-0.384425	0.496788	-0.773822	0.439036	NA
AC073283.4	17.1972	-0.167464	0.475321	-0.352318	0.7246	0.844033
AC073283.7	0.349775	-0.0176811	0.482868	-0.0366169	0.97079	NA
AC073316.1	0.536795	0.14861	0.534181	0.278202	0.780857	NA
AC073316.2	0.537501	-0.548207	0.568481	-0.964336	0.334878	NA
AC073326.3	0.542438	-0.481719	0.540076	-0.891947	0.372421	NA
AC073333.1	12.0361	0.330885	0.516785	0.640275	0.521994	0.692632
AC073333.8	2.6022	-0.597538	0.714012	-0.836873	0.402664	0.581725
AC073342.12	0.538604	-0.103542	0.537569	-0.192611	0.847264	NA
AC073343.13	6.55176	0.48463	0.629949	0.769317	0.441705	0.620533
AC073410.1	0.614141	-0.063776	0.583281	-0.10934	0.912933	NA
AC073415.2	36.4547	0.630234	0.340938	1.84853	0.0645259	0.14122
AC073635.5	1.45144	0.0387417	0.706226	0.0548574	0.956252	0.979094
AC073641.2	0.602867	0.176998	0.545425	0.324513	0.745549	NA
AC073657.1	0.870423	0.508324	0.650364	0.781598	0.434451	NA
AC073957.15	0.195881	0.165172	0.449234	0.367675	0.713115	NA
AC074011.2	0.372179	0.0473982	0.491186	0.0964973	0.923126	NA
AC074117.10	449.037	-0.484253	0.138032	-3.50828	0.000451017	0.00174959
AC074117.13	0.532565	-0.473523	0.537817	-0.880454	0.378614	NA
AC074141.3	50.2979	-0.578729	0.298111	-1.94132	0.0522199	0.118256
AC074183.3	11.8735	-0.294344	0.507817	-0.579626	0.562167	0.726131
AC074212.5	30.6001	-0.182875	0.372955	-0.490341	0.623893	0.775936
AC074212.6	32.5772	0.324054	0.356414	0.909207	0.363241	0.54254
AC074286.1	24.286	0.191726	0.394549	0.485939	0.627011	0.778059
AC074289.1	294.701	-3.52131	0.183549	-19.1845	4.98482e-82	4.36809e-80
AC074363.1	13.8857	-1.9707	0.520554	-3.78577	0.000153233	0.000650937
AC074375.1	0.269302	-0.0305832	0.449155	-0.0680904	0.945714	NA
AC074389.7	0.369357	0.301098	0.492972	0.61078	0.541345	NA
AC074391.1	1.46531	0.825678	0.676427	1.22065	0.22222	0.378595
AC078852.1	3.95649	-0.716447	0.685548	-1.04507	0.29599	0.468511
AC078852.2	3.43003	-0.0379047	0.699997	-0.0541497	0.956816	0.97928
AC078883.3	1.30248	0.232301	0.698926	0.332369	0.739611	NA
AC078883.4	0.271417	0.179517	0.450331	0.398633	0.690163	NA
AC078899.1	0.565238	0.513779	0.547716	0.938037	0.348225	NA
AC078941.1	4.38864	-1.86702	0.692648	-2.69548	0.00702883	0.0209227
AC079135.1	5.00105	0.902004	0.675492	1.33533	0.181768	0.325396
AC079145.4	6.61879	0.420588	0.611241	0.688089	0.491397	0.666957
AC079250.1	4.41932	-0.227512	0.671132	-0.338997	0.734612	0.850423
AC079305.10	2.76676	0.620231	0.708436	0.875493	0.381305	0.560248
AC079354.3	1.22026	0.450474	0.680222	0.662245	0.507814	NA
AC079354.5	0.978165	-0.76972	0.659239	-1.16759	0.242973	NA
AC079466.1	2.04885	0.384461	0.715792	0.537112	0.59119	0.751215
AC079586.1	0.855841	0.144236	0.626028	0.230398	0.817782	NA
AC079610.2	1.14852	0.371492	0.677823	0.548066	0.583646	NA
AC079612.1	1.29689	-0.738204	0.671815	-1.09882	0.271847	NA
AC079630.4	0.342724	-0.22978	0.449022	-0.511735	0.608837	NA
AC079741.2	0.311225	0.195823	0.467838	0.41857	0.67553	NA
AC079753.4	0.363318	-0.0182109	0.487846	-0.0373292	0.970223	NA
AC079753.5	0.372179	0.0473982	0.491186	0.0964973	0.923126	NA
AC079776.1	5.81333	0.287548	0.633852	0.453651	0.65008	0.794185
AC079776.2	0.409165	0.318765	0.505027	0.631183	0.527921	NA
AC079779.4	0.442779	0.105102	0.544074	0.193177	0.846821	NA
AC079779.5	0.637556	-0.0881954	0.610497	-0.144465	0.885133	NA
AC079779.6	0.643596	0.30556	0.592299	0.515888	0.605933	NA
AC079780.3	1.44154	-0.281842	0.706442	-0.39896	0.689923	0.822842
AC079781.5	0.367242	0.0469513	0.489439	0.0959287	0.923577	NA
AC079781.7	0.46408	-0.226159	0.547424	-0.413134	0.679509	NA
AC079781.8	0.384646	-0.0189206	0.494297	-0.0382778	0.969466	NA
AC079807.2	25.482	-0.0151445	0.393583	-0.0384785	0.969306	0.985226
AC079807.4	0.539616	-0.189504	0.565479	-0.335121	0.737534	NA
AC079907.1	1.33116	-0.0250572	0.691141	-0.0362549	0.971079	NA
AC079922.2	29.5933	0.0567236	0.35927	0.157885	0.874547	0.937672
AC079922.3	23.0134	0.955636	0.406064	2.35341	0.0186021	0.0490846
AC083822.2	0.271417	0.179517	0.450331	0.398633	0.690163	NA
AC083843.1	223.841	-0.116274	0.167865	-0.692663	0.488521	0.66433
AC083843.2	1.4051	0.264248	0.70391	0.375401	0.707362	0.834397
AC083843.4	7.56931	0.566282	0.597185	0.948252	0.343001	0.520406
AC083867.4	0.694614	-0.0121306	0.596448	-0.020338	0.983774	NA
AC083873.4	0.744358	0.0567858	0.583655	0.0972936	0.922493	NA
AC083884.8	2.99113	-0.0943595	0.704974	-0.133848	0.893523	0.946271
AC083899.3	54.8832	0.03037	0.27605	0.110016	0.912396	0.95688
AC083900.1	0.269302	-0.0305832	0.449155	-0.0680904	0.945714	NA
AC083949.1	1.1358	0.333278	0.677129	0.492193	0.622583	NA
AC084082.3	1.7158	-0.00884635	0.711676	-0.0124303	0.990082	0.995321
AC084117.3	1.60359	0.136607	0.708502	0.192812	0.847107	0.919281
AC084121.17	0.389582	-0.019106	0.495944	-0.0385246	0.969269	NA
AC084149.1	0.444894	0.373506	0.515036	0.725204	0.468327	NA
AC084219.4	13.6432	0.527119	0.503807	1.04627	0.295436	0.467961
AC084809.2	1.25553	-0.438518	0.667437	-0.657018	0.511169	NA
AC087073.1	4.99309	2.60853	0.713274	3.65712	0.000255063	0.0010362
AC087163.2	3.66352	0.408753	0.701848	0.582395	0.5603	0.724963
AC087294.2	6.92822	-0.442522	0.614029	-0.720686	0.471103	0.648128
AC087350.1	6.32824	-0.0628325	0.62406	-0.100683	0.919802	0.960651
AC090154.1	5.67381	0.302604	0.644539	0.469489	0.63872	0.786845
AC090286.2	0.559198	0.211661	0.573198	0.369263	0.711932	NA
AC090498.1	9.46428	-0.449128	0.561558	-0.799789	0.423833	0.602757
AC090505.6	1.43254	-1.31136	0.679034	-1.93122	0.0534563	0.120589
AC090587.4	6.00252	0.754422	0.638916	1.18079	0.237688	0.398873
AC090587.5	3.08862	0.371597	0.705505	0.526711	0.598395	0.75667
AC090602.2	0.467298	0.411162	0.52358	0.78529	0.432283	NA
AC090616.2	5.77937	-1.09015	0.644601	-1.69119	0.0907996	0.186958
AC090804.1	0.673503	-0.0423075	0.569073	-0.0743447	0.940736	NA
AC090945.1	3.9184	0.189564	0.681146	0.278301	0.780781	0.880218
AC090952.5	0.880748	-0.222218	0.624711	-0.355713	0.722056	NA
AC091180.1	5.75542	-0.356963	0.651758	-0.547692	0.583903	0.745069
AC091493.1	5.49131	-1.4914	0.667284	-2.23504	0.0254149	0.0642348
AC091493.2	33.7082	-1.7769	0.416113	-4.27024	1.95266e-05	9.65778e-05
AC091633.3	0.34766	-0.272253	0.482258	-0.564539	0.572387	NA
AC091729.7	0.61641	0.178902	0.548005	0.326461	0.744076	NA
AC091729.8	0.55598	-0.493167	0.543268	-0.907779	0.363995	NA
AC091729.9	158.459	0.017357	0.171702	0.101088	0.919481	0.960611
AC091801.1	2.61476	-0.484269	0.716369	-0.676004	0.499038	0.673463
AC091814.3	1.52452	0.877477	0.684876	1.28122	0.200116	0.349631
AC091878.1	7.3193	0.170327	0.610812	0.278854	0.780357	0.88005
AC092066.1	94.3345	0.94733	0.255305	3.71059	0.00020678	0.000855579
AC092155.1	1.47742	-0.311784	0.701485	-0.444464	0.656707	0.799206
AC092155.4	0.713799	-0.737329	0.605719	-1.21728	0.223498	NA
AC092159.1	0.442779	0.105102	0.544074	0.193177	0.846821	NA
AC092159.2	9.28949	0.295224	0.562952	0.524421	0.599985	0.758018
AC092162.1	2.16933	-1.26518	0.706243	-1.79142	0.0732257	0.157007
AC092171.2	1.78648	1.17695	0.70937	1.65915	0.0970861	0.197492
AC092171.4	297.668	0.198051	0.155167	1.27637	0.201823	0.351906
AC092198.1	46.5742	1.63209	0.342292	4.76812	1.85957e-06	1.06514e-05
AC092295.4	1.02824	0.329794	0.681182	0.484149	0.62828	NA
AC092301.3	18.7065	-0.54027	0.430062	-1.25626	0.209022	0.361586
AC092384.1	0.344839	-0.0174862	0.481	-0.0363538	0.971	NA
AC092415.1	4.4916	-0.571317	0.670035	-0.852668	0.393843	0.573416
AC092573.2	2.42795	-0.331895	0.716831	-0.463003	0.643362	0.789732
AC092580.3	0.895034	-0.78999	0.604434	-1.30699	0.191216	NA
AC092580.4	0.880225	-0.89494	0.629617	-1.42141	0.155199	NA
AC092597.3	0.582642	0.584186	0.580731	1.00595	0.31444	NA
AC092610.12	0.386761	0.248891	0.493536	0.504303	0.614049	NA
AC092614.2	24.4702	0.702003	0.406009	1.72903	0.0838033	0.175136
AC092641.2	1.18321	0.103891	0.682273	0.152272	0.878972	NA
AC092667.2	1.46943	0.580427	0.697634	0.831993	0.405413	0.584827
AC092669.3	273.693	-0.717569	0.15059	-4.76504	1.88815e-06	1.08042e-05
AC092675.3	0.599006	0.232093	0.580135	0.400068	0.689107	NA
AC092684.1	0.409165	0.318765	0.505027	0.631183	0.527921	NA
AC092687.3	0.737243	-0.328735	0.605847	-0.542605	0.587402	NA
AC092687.5	0.372179	0.0473982	0.491186	0.0964973	0.923126	NA
AC092798.2	0.661063	0.29208	0.565964	0.516076	0.605801	NA
AC092835.2	91.0287	0.347013	0.242876	1.42876	0.153072	0.284312
AC092881.1	13.8912	0.347099	0.512478	0.677297	0.498218	0.672781
AC093107.7	0.735497	0.0263626	0.631213	0.041765	0.966686	NA
AC093110.3	17.8363	-0.559028	0.474148	-1.17902	0.238391	0.399729
AC093162.5	2.78649	0.841887	0.709659	1.18633	0.235493	0.396074
AC093323.3	508.608	-0.242502	0.119516	-2.02903	0.0424556	0.0995681
AC093375.1	16.081	0.0295228	0.465284	0.0634513	0.949407	0.976045
AC093382.1	1.29322	-0.819127	0.686642	-1.19295	0.23289	NA
AC093388.3	9.22255	-0.634001	0.568379	-1.11545	0.264656	0.431418
AC093390.1	16.0435	-1.11194	0.508747	-2.18565	0.0288409	0.0716049
AC093495.4	30.5859	-0.0120875	0.360703	-0.0335109	0.973267	0.987462
AC093609.1	3.15514	1.47461	0.713567	2.06653	0.0387782	0.0922064
AC093616.4	13.1852	-0.774777	0.494343	-1.56729	0.117048	0.229866
AC093620.5	4.15277	2.19648	0.706827	3.10753	0.00188661	0.00644297
AC093627.10	20.3611	-0.876264	0.440295	-1.99018	0.0465714	0.107624
AC093627.7	5.20859	-2.97214	0.704912	-4.21633	2.48313e-05	0.000121066
AC093627.8	0.569523	-0.426043	0.51022	-0.835018	0.403708	NA
AC093627.9	46.2194	-0.202137	0.302021	-0.669281	0.503316	0.676756
AC093642.1	45.1301	0.686814	0.326513	2.10348	0.0354239	0.0853982
AC093642.3	49.9727	0.369338	0.311615	1.18524	0.235922	0.396649
AC093642.5	11.9302	-1.4423	0.526011	-2.74195	0.00610754	0.0184672
AC093673.5	210.861	-1.20433	0.178478	-6.74779	1.50114e-11	1.43016e-10
AC093690.1	0.385722	0.0486105	0.495847	0.0980353	0.921904	NA
AC093702.1	0.389582	-0.019106	0.495944	-0.0385246	0.969269	NA
AC093724.2	30.3543	0.553022	0.377506	1.46494	0.142938	0.269071
AC093732.1	0.409165	0.318765	0.505027	0.631183	0.527921	NA
AC093787.1	0.702986	0.644913	0.574137	1.12327	0.261321	NA
AC093818.1	40.5903	-1.60849	0.327098	-4.91747	8.76703e-07	5.2283e-06
AC093826.1	0.619077	-0.0747594	0.60782	-0.122996	0.90211	NA
AC093838.4	660.49	0.333595	0.126388	2.63946	0.00830371	0.0242389
AC093901.1	8.59736	-0.0107412	0.579891	-0.0185229	0.985222	0.992867
AC094019.4	0.379682	-0.238403	0.456131	-0.522665	0.601208	NA
AC096574.4	1.4906	0.657141	0.699687	0.939193	0.347631	0.52493
AC096574.5	10.04	-0.980433	0.559025	-1.75383	0.0794601	0.167734
AC096649.2	0.4456	-0.221493	0.54357	-0.407478	0.683657	NA
AC096669.3	0.487523	0.110007	0.553908	0.198601	0.842575	NA
AC096670.3	1.32794	-0.712908	0.699462	-1.01922	0.308097	NA
AC097359.2	0.501066	0.11157	0.556955	0.200321	0.841229	NA
AC097374.2	0.806803	-0.625723	0.639855	-0.977913	0.328117	NA
AC097381.1	0.461258	0.10741	0.548755	0.195735	0.844818	NA
AC097382.5	0.694614	-0.0121306	0.596448	-0.020338	0.983774	NA
AC097461.4	0.945959	0.562959	0.659484	0.853635	0.393307	NA
AC097467.2	0.991806	0.986367	0.64369	1.53236	0.125433	NA
AC097468.4	0.600045	0.499309	0.548676	0.910026	0.362809	NA
AC097523.1	2.20048	0.0458512	0.715254	0.0641048	0.948887	0.975752
AC097662.2	25.9912	0.517273	0.391384	1.32165	0.186284	0.33125
AC097721.2	3.88478	0.346616	0.67846	0.510887	0.60943	0.765274
AC097724.3	9.35204	0.393724	0.551819	0.713503	0.475535	0.652716
AC098614.2	15.2035	-1.41348	0.497128	-2.8433	0.00446493	0.0139559
AC098617.1	0.344839	-0.0174862	0.481	-0.0363538	0.971	NA
AC098820.3	3.61177	0.369008	0.688491	0.535965	0.591983	0.751842
AC098820.4	0.93248	0.544885	0.637762	0.854371	0.3929	NA
AC098823.3	0.482586	0.109428	0.55277	0.197963	0.843074	NA
AC098973.1	0.447715	0.105726	0.545349	0.193869	0.846278	NA
AC098973.2	47.0402	0.35772	0.294198	1.21592	0.224017	0.380862
AC099342.1	0.542834	0.482692	0.543563	0.888015	0.374533	NA
AC099535.4	0.771407	0.367562	0.606554	0.605984	0.544525	NA
AC099754.1	1.82193	-1.10625	0.710488	-1.55703	0.119463	0.233399
AC099850.1	17.695	-0.0913618	0.444753	-0.205421	0.837243	0.913576
AC100830.3	4.98472	-0.853187	0.668095	-1.27705	0.201586	0.351602
AC100830.5	5.85046	-1.68129	0.655544	-2.56473	0.0103258	0.0293567
AC102953.4	0.271417	0.179517	0.450331	0.398633	0.690163	NA
AC102953.6	0.722406	-0.659246	0.580898	-1.13487	0.256428	NA
AC103564.7	1.90666	-0.203995	0.716635	-0.284656	0.775907	0.877217
AC104076.3	1.36931	0.159306	0.683404	0.233106	0.815679	0.900125
AC104113.3	0.733382	-0.319326	0.629259	-0.507465	0.611829	NA
AC104134.2	1.02714	-0.0679969	0.677359	-0.100385	0.920038	NA
AC104135.2	1.85	0.564049	0.714235	0.789724	0.429689	0.608681
AC104304.4	12.5943	-4.21485	0.656267	-6.42246	1.34086e-10	1.18554e-09
AC104389.28	1.0435	-0.390895	0.666815	-0.586213	0.557733	NA
AC104532.3	0.195881	0.165172	0.449234	0.367675	0.713115	NA
AC104532.4	2.29238	-0.158394	0.714587	-0.221658	0.82458	0.905869
AC104534.2	1.15995	0.0621911	0.689032	0.0902586	0.928082	NA
AC104653.1	1.90078	0.925622	0.715334	1.29397	0.195675	0.34331
AC104654.2	1.44328	-0.612574	0.702093	-0.872497	0.382938	0.561781
AC104655.3	59.4725	0.491267	0.271947	1.80648	0.0708429	0.152608
AC104667.3	1.02227	0.00435295	0.647416	0.00672357	0.994635	NA
AC104699.1	0.384646	-0.0189206	0.494297	-0.0382778	0.969466	NA
AC104809.4	0.519022	-0.462307	0.534635	-0.864715	0.387195	NA
AC104843.3	0.352596	-0.22978	0.449022	-0.511735	0.608837	NA
AC105053.3	1.21916	0.129304	0.681981	0.189601	0.849622	NA
AC105339.1	0.945563	-0.489738	0.637966	-0.767655	0.442692	NA
AC105393.1	1.79539	-0.269643	0.714837	-0.377209	0.706018	0.833638
AC105402.2	0.582642	0.584186	0.580731	1.00595	0.31444	NA
AC105402.4	0.678467	0.332937	0.597759	0.556975	0.577544	NA
AC105760.2	19.4842	0.0264742	0.42486	0.0623128	0.950314	0.976413
AC105760.3	0.366139	-0.280613	0.48831	-0.574661	0.565521	NA
AC106786.1	0.558123	0.17795	0.566299	0.314233	0.753344	NA
AC106869.2	2.17888	0.739515	0.715638	1.03336	0.301433	0.47447
AC106874.1	0.732279	-0.666634	0.582409	-1.14462	0.252369	NA
AC106875.1	12.9729	-2.03267	0.551516	-3.68561	0.000228152	0.000936467
AC107079.1	0.792554	0.0940677	0.637686	0.147514	0.882726	NA
AC107081.5	6.47071	-1.11729	0.656351	-1.70228	0.0887026	0.183526
AC107218.3	0.879284	0.490213	0.630424	0.777592	0.43681	NA
AC108004.2	0.311225	0.195823	0.467838	0.41857	0.67553	NA
AC108025.2	5.02309	1.08114	0.663884	1.6285	0.103419	0.207904
AC108142.1	203.276	-1.61502	0.174255	-9.26812	1.89462e-20	3.16583e-19
AC108448.2	2.50983	0.616264	0.712074	0.865449	0.386793	0.565738
AC108448.3	6.93549	-0.873562	0.611129	-1.42942	0.152883	0.284148
AC108463.1	4.00681	0.200409	0.683671	0.293136	0.769418	0.872805
AC108463.2	5.38912	0.589028	0.650489	0.905516	0.365192	0.544465
AC108479.2	0.389582	-0.019106	0.495944	-0.0385246	0.969269	NA
AC108488.4	47.0288	-0.199661	0.295744	-0.675114	0.499603	0.674002
AC108868.3	0.386761	0.248891	0.493536	0.504303	0.614049	NA
AC109333.10	0.938881	-0.143841	0.636407	-0.22602	0.821186	NA
AC109486.1	5.74483	-0.692162	0.640611	-1.08047	0.279932	0.449706
AC109631.1	0.868308	0.154153	0.649277	0.237423	0.812329	NA
AC109642.1	18.0806	-3.30312	0.538952	-6.12877	8.85586e-10	7.22791e-09
AC109829.1	1.13973	0.407896	0.688905	0.592094	0.553788	NA
AC110299.5	0.961248	0.182096	0.652594	0.279034	0.780219	NA
AC110602.1	0.585463	0.23253	0.577538	0.402622	0.687226	NA
AC110769.3	0.361203	-0.278417	0.486735	-0.57201	0.567315	NA
AC111200.7	0.697435	-0.345439	0.6003	-0.575444	0.564991	NA
AC112198.1	0.599006	0.232093	0.580135	0.400068	0.689107	NA
AC112229.1	0.4456	-0.221493	0.54357	-0.407478	0.683657	NA
AC112497.1	16.735	0.489417	0.464491	1.05366	0.292037	0.464138
AC112715.2	0.59793	0.177027	0.544409	0.325172	0.745051	NA
AC112721.2	0.369357	0.301098	0.492972	0.61078	0.541345	NA
AC113189.5	61.0857	-0.536063	0.304349	-1.76135	0.07818	0.165542
AC113404.1	42.4388	-0.103341	0.327012	-0.316017	0.75199	0.862425
AC114271.2	8.83543	0.291763	0.58998	0.49453	0.620932	0.774
AC114730.11	4.12899	0.21998	0.675465	0.325672	0.744672	0.858037
AC114730.2	0.287781	-0.0318243	0.457416	-0.0695741	0.944533	NA
AC114730.3	3.07521	-0.117403	0.703865	-0.166798	0.867529	0.933357
AC114730.5	0.806097	0.0850354	0.639073	0.133061	0.894145	NA
AC114730.8	0.459143	-0.224249	0.546401	-0.410411	0.681504	NA
AC114752.3	0.34766	-0.272253	0.482258	-0.564539	0.572387	NA
AC114776.1	3.40774	-0.140349	0.695629	-0.201759	0.840105	0.915374
AC114808.2	0.612026	-0.344653	0.552752	-0.623521	0.532942	NA
AC114877.3	9.3967	-1.48078	0.590256	-2.5087	0.0121177	0.0338009
AC115617.2	1.68038	0.473266	0.714537	0.66234	0.507753	0.680335
AC116366.6	1.7353	-0.0749922	0.714824	-0.10491	0.916447	0.959259
AC116609.2	3.62599	0.166871	0.693775	0.240526	0.809922	0.896969
AC116609.3	0.717017	0.0387796	0.628994	0.0616533	0.950839	NA
AC116614.1	80.3761	-3.49057	0.311749	-11.1967	4.23065e-29	9.94248e-28
AC123886.2	0.366139	-0.280613	0.48831	-0.574661	0.565521	NA
AC124312.1	2.62647	-0.582562	0.71553	-0.814168	0.415548	0.594612
AC124789.1	144.739	0.0669321	0.19603	0.341438	0.732774	0.848885
AC125232.1	62.9393	-0.247544	0.263416	-0.939747	0.347347	0.524781
AC125634.1	0.344839	-0.0174862	0.481	-0.0363538	0.971	NA
AC126365.1	0.271417	0.179517	0.450331	0.398633	0.690163	NA
AC126544.4	0.69955	-0.0119983	0.570321	-0.0210378	0.983215	NA
AC127904.2	0.755079	0.381522	0.613464	0.621913	0.533999	NA
AC128709.3	0.311225	0.195823	0.467838	0.41857	0.67553	NA
AC129492.6	3.47099	-0.817435	0.69402	-1.17783	0.238866	0.400347
AC129778.2	0.482586	0.109428	0.55277	0.197963	0.843074	NA
AC130469.1	0.991806	0.986367	0.64369	1.53236	0.125433	NA
AC130469.2	3.93372	-0.133086	0.681797	-0.195199	0.845237	0.918134
AC131056.3	0.344839	-0.0174862	0.481	-0.0363538	0.971	NA
AC131263.1	12.6695	0.200448	0.508188	0.394436	0.693259	0.824948
AC132008.1	0.948781	0.220276	0.672743	0.32743	0.743342	NA
AC133106.2	0.195881	0.165172	0.449234	0.367675	0.713115	NA
AC133644.2	0.84698	0.104183	0.627169	0.166116	0.868065	NA
AC133785.1	5.24132	-1.55252	0.676994	-2.29325	0.0218337	0.0564326
AC135048.13	1.04282	0.640693	0.665519	0.962697	0.3357	NA
AC135050.5	1.74133	0.247345	0.715815	0.345544	0.729686	0.846985
AC136289.1	1.13048	0.972454	0.63826	1.5236	0.127608	NA
AC137723.5	0.447715	0.105726	0.545349	0.193869	0.846278	NA
AC137932.4	28.3915	-0.339078	0.387048	-0.876061	0.380997	0.559905
AC137932.5	11.7421	0.985287	0.522603	1.88534	0.0593834	0.131712
AC137932.6	5.36555	0.375968	0.668263	0.562605	0.573704	0.736446
AC137934.1	10.2585	-0.62743	0.543692	-1.15402	0.248494	0.412337
AC138035.2	59.5864	0.088287	0.273207	0.323151	0.746581	0.859324
AC138430.4	6.7583	-0.0387188	0.614655	-0.0629928	0.949772	0.976164
AC138744.2	0.287781	-0.0318243	0.457416	-0.0695741	0.944533	NA
AC138969.4	20.3019	-0.183571	0.424871	-0.432062	0.665696	0.805807
AC139099.5	0.585463	0.23253	0.577538	0.402622	0.687226	NA
AC139099.6	0.274238	-0.0308478	0.450934	-0.0684086	0.94546	NA
AC139100.3	7.72968	0.616557	0.58837	1.04791	0.294681	0.467197
AC139100.4	11.1835	0.068097	0.527742	0.129035	0.89733	0.948571
AC139887.4	2.88014	-0.56939	0.708466	-0.803694	0.421574	0.60073
AC141586.5	194.458	0.438998	0.167038	2.62814	0.00858537	0.0249644
AC141928.1	629.686	6.22521	0.234803	26.5125	6.95678e-155	1.82882e-152
AC141930.2	1.33076	-1.03944	0.689256	-1.50807	0.131538	NA
AC142119.1	4.45432	-1.14846	0.692938	-1.65738	0.0974419	0.198162
AC142472.6	22.9844	-0.448907	0.398289	-1.12709	0.259705	0.425773
AC142528.1	6.4483	-0.0387284	0.624608	-0.0620044	0.950559	0.97645
AC144450.1	9.7164	-1.94921	0.621185	-3.13788	0.00170173	0.00587729
AC144450.2	14.674	-1.88815	0.519225	-3.63648	0.000276393	0.0011161
AC144530.1	2.96824	0.246767	0.71353	0.345839	0.729464	0.846945
AC144652.1	69.4915	-0.0336113	0.258308	-0.130121	0.896471	0.948183
AC144831.1	5.15052	1.51222	0.668038	2.26368	0.0235941	0.0602729
AC144831.3	1.97202	0.354037	0.716408	0.494183	0.621177	0.774097
AC145124.2	100.837	0.822837	0.236149	3.4844	0.000493237	0.00190195
AC145343.2	0.722406	-0.659246	0.580898	-1.13487	0.256428	NA
AC145676.2	1.00158	-0.793927	0.663661	-1.19628	0.231585	NA
AC147651.4	0.269302	-0.0305832	0.449155	-0.0680904	0.945714	NA
AC147651.5	0.557084	-0.129163	0.57116	-0.226142	0.821091	NA
AC156455.1	32.2917	-1.07641	0.360889	-2.98266	0.00285759	0.00934263
AC159540.1	136.878	1.01347	0.201231	5.03633	4.74553e-07	2.93454e-06
AC159540.14	0.904037	0.185189	0.655253	0.282622	0.777467	NA
AC159540.2	4.11317	0.906563	0.687941	1.31779	0.187574	0.332888
AC226118.1	17.2791	-1.64907	0.490021	-3.36531	0.000764578	0.00284209
AC234582.1	0.4456	-0.221493	0.54357	-0.407478	0.683657	NA
AC241377.1	1.84869	1.21235	0.710431	1.7065	0.0879159	0.182165
AC241585.1	8.70013	0.334531	0.590119	0.566888	0.570791	0.733874
AC242988.1	1.49336	0.343975	0.707029	0.486507	0.626608	0.777753
AC245100.1	21.6345	0.597788	0.417027	1.43345	0.151729	0.282468
ACA59	0.897998	-0.179709	0.629029	-0.285693	0.775113	NA
ACA64	0.719132	0.361384	0.607428	0.594941	0.551883	NA
ACAA1	546.849	-0.128885	0.126132	-1.02183	0.306862	0.480506
ACAA2	2207.07	-0.71389	0.0783202	-9.11502	7.86579e-20	1.27294e-18
ACACA	6533.88	0.00836759	0.107557	0.0777969	0.93799	0.970441
ACACB	384.701	-0.118916	0.144626	-0.822229	0.410947	0.590072
ACAD10	576.284	0.109271	0.108746	1.00482	0.314983	0.488898
ACAD11	1.48654	-0.167547	0.678322	-0.247003	0.804906	0.894437
ACAD8	1648.12	-1.07595	0.0897852	-11.9836	4.32935e-33	1.15969e-31
ACAD9	954.197	0.0852098	0.0922533	0.923651	0.355668	0.53414
ACADL	5.02727	0.296789	0.647287	0.458512	0.646584	0.791788
ACADM	1749.27	-0.247552	0.0947935	-2.61149	0.00901483	0.0260857
ACADS	79.8428	-0.651417	0.250822	-2.59713	0.00940058	0.0270771
ACADSB	379.295	-0.132182	0.134787	-0.980677	0.326752	0.502087
ACADVL	3797.24	-0.515198	0.0895348	-5.75416	8.70711e-09	6.49671e-08
ACAN	38.4998	2.23647	0.38835	5.7589	8.46631e-09	6.3233e-08
ACAP1	139.684	-1.87643	0.200382	-9.36429	7.65651e-21	1.30149e-19
ACAP2	1707.21	-0.0142616	0.0990709	-0.143953	0.885538	0.943003
ACAP2-IT1	6.30627	-0.364157	0.622085	-0.585382	0.558291	0.723356
ACAP3	1814.19	0.522563	0.117745	4.4381	9.0756e-06	4.69522e-05
ACAT1	1103.33	-0.232967	0.106026	-2.19727	0.0280014	0.0697891
ACAT2	6651.18	0.215735	0.0878881	2.45465	0.0141021	0.0386543
ACBD3	1170.84	0.121013	0.0999993	1.21014	0.226227	0.383828
ACBD4	104.26	-1.43763	0.240319	-5.98218	2.20167e-09	1.72831e-08
ACBD5	664.741	0.0776028	0.111997	0.692901	0.488372	0.664236
ACBD6	1840.2	-0.251233	0.0865055	-2.90425	0.00368136	0.011719
ACBD7	86.8682	-0.440606	0.232172	-1.89776	0.0577283	0.128748
ACCS	228.232	0.126639	0.176071	0.719247	0.471989	0.648917
ACCSL	0.366139	-0.280613	0.48831	-0.574661	0.565521	NA
ACD	679.925	-0.3524	0.135691	-2.59707	0.00940229	0.0270786
ACE	21.5724	-1.1537	0.43341	-2.66191	0.00776986	0.0228606
ACE2	5.45568	0.195004	0.64061	0.304403	0.760821	0.86781
ACER2	120.483	0.101077	0.207549	0.487006	0.626254	0.777547
ACER3	570.759	-0.304933	0.11933	-2.55537	0.0106075	0.0300255
ACHE	45.1651	0.775439	0.302827	2.56067	0.0104471	0.0296584
ACIN1	9207.16	0.0367885	0.0709365	0.518612	0.604031	0.761455
ACKR1	29.6809	0.532359	0.379533	1.40267	0.160716	0.295331
ACKR2	3.09474	1.23377	0.71022	1.73717	0.082357	0.172576
ACKR3	136.637	1.63869	0.206049	7.9529	1.82195e-15	2.30115e-14
ACKR4	3.76025	-0.217735	0.686397	-0.317215	0.75108	0.862107
ACLY	14666.4	0.0972825	0.0858762	1.13282	0.257289	0.423008
ACMSD	7.01915	0.538726	0.605608	0.889562	0.373701	0.552379
ACO1	2138.59	-1.13948	0.0863616	-13.1943	9.46102e-40	3.15945e-38
ACO2	1394.08	-0.0235048	0.100069	-0.234886	0.814297	0.899303
ACOT11	115.171	-0.420166	0.204957	-2.05002	0.0403627	0.095402
ACOT12	73.9565	4.79476	0.409265	11.7155	1.06133e-31	2.73286e-30
ACOT13	452.114	-0.441751	0.127773	-3.45732	0.000545581	0.00208529
ACOT2	3.50639	-1.31567	0.709605	-1.85409	0.0637263	0.139686
ACOT4	27.3769	-0.848775	0.380473	-2.23084	0.0256914	0.0648322
ACOT6	1.11306	-0.619848	0.673419	-0.920449	0.357338	NA
ACOT7	2333.13	-0.623751	0.0800778	-7.78931	6.7375e-15	8.21139e-14
ACOT8	160.357	-0.369598	0.172233	-2.14592	0.0318794	0.0779672
ACOT9	862.877	0.12371	0.107457	1.15125	0.249629	0.413723
ACOX1	427.561	-0.5372	0.1204	-4.46178	8.12798e-06	4.23697e-05
ACOX2	100.12	0.987122	0.260507	3.78924	0.00015111	0.000642404
ACOX3	301.744	0.225238	0.1433	1.5718	0.115997	0.228139
ACOXL	69.8593	-3.26138	0.326562	-9.98702	1.73721e-23	3.30041e-22
ACP1	3369.73	0.0421526	0.0834614	0.505055	0.61352	0.768617
ACP2	1086.04	0.298654	0.117101	2.5504	0.0107599	0.0304037
ACP5	11.3876	-0.53295	0.562569	-0.947351	0.34346	0.520891
ACP6	865.865	-0.341851	0.106703	-3.20377	0.00135639	0.00479145
ACP7	1.37583	-1.09469	0.651746	-1.67963	0.0930291	0.190628
ACPP	20.0774	1.47573	0.496789	2.97054	0.00297275	0.00967158
ACPT	6.64048	0.677423	0.611372	1.10804	0.267846	0.435049
ACR	0.830615	0.438371	0.627346	0.698771	0.484695	NA
ACRBP	26.9744	0.0835813	0.385734	0.216681	0.828457	0.908097
ACRC	59.4311	0.284853	0.280003	1.01732	0.309002	0.482797
ACRV1	29.0744	-0.145011	0.379485	-0.382126	0.702368	0.831281
ACSBG1	49.2347	-1.52952	0.318775	-4.79813	1.60152e-06	9.27199e-06
ACSBG2	6.1103	-0.73471	0.652567	-1.12588	0.260218	0.426367
ACSF2	364.602	0.237444	0.135888	1.74735	0.0805769	0.169585
ACSF3	404.358	0.0318572	0.122663	0.259713	0.795085	0.888519
ACSL1	125.612	0.0335367	0.202398	0.165696	0.868396	0.93368
ACSL3	4269.55	-0.647459	0.0917659	-7.05555	1.71918e-12	1.76669e-11
ACSL4	2479.35	-0.0832491	0.134108	-0.620764	0.534755	0.703506
ACSL5	3.71295	0.392288	0.699635	0.560703	0.575	0.737572
ACSL6	29.9503	1.07747	0.377202	2.85648	0.00428365	0.0134432
ACSM1	3.11662	-0.634846	0.708271	-0.896331	0.370076	0.548835
ACSM3	12.5133	-0.196808	0.506041	-0.388918	0.697337	0.827536
ACSM6	1.97849	-0.193737	0.716313	-0.270465	0.786803	0.883483
ACSS1	7.51959	1.24187	0.618504	2.00786	0.0446587	0.103851
ACSS2	757.166	0.980785	0.159547	6.14731	7.88064e-10	6.45761e-09
ACSS3	833.37	0.737336	0.310515	2.37456	0.0175699	0.046755
ACTA1	131.102	4.35911	0.3109	14.0209	1.16104e-44	4.44896e-43
ACTA2	559.984	4.96283	0.180369	27.5149	1.16361e-166	3.60368e-164
ACTA2-AS1	5.4813	0.490298	0.647723	0.756956	0.449076	0.627408
ACTB	105469	0.026852	0.063078	0.425696	0.670329	0.809119
ACTBP13	3.03566	-0.0926901	0.699398	-0.132528	0.894566	0.946896
ACTBP2	0.756825	0.0626484	0.633695	0.098862	0.921248	NA
ACTC1	899.279	1.55049	0.15132	10.2464	1.22789e-24	2.4523e-23
ACTG1	72850.5	0.721687	0.0669488	10.7797	4.2934e-27	9.37828e-26
ACTG1P1	10.7679	0.544676	0.53777	1.01284	0.311135	0.485042
ACTG1P10	1.39478	0.934294	0.694629	1.34503	0.178616	0.32082
ACTG1P15	1.75276	-0.0282671	0.716301	-0.0394626	0.968522	0.984902
ACTG1P16	0.363318	-0.0182109	0.487846	-0.0373292	0.970223	NA
ACTG1P17	2.85105	-0.373143	0.711555	-0.524405	0.599997	0.758018
ACTG1P20	9.41085	0.137175	0.559483	0.245182	0.806316	0.894912
ACTG1P24	6.7979	1.2605	0.63678	1.97949	0.0477614	0.109899
ACTG1P3	2.30914	0.324778	0.716815	0.453085	0.650487	0.794287
ACTG2	397.099	1.01532	0.189702	5.35219	8.68974e-08	5.84e-07
ACTL10	2.75538	-0.316935	0.707416	-0.448017	0.654141	0.797036
ACTL6A	3424.06	0.250579	0.0795484	3.15002	0.00163261	0.00566763
ACTL6B	11.3166	-2.61881	0.57858	-4.52626	6.00357e-06	3.18463e-05
ACTL8	206.705	-1.87986	0.180909	-10.3912	2.71954e-25	5.55406e-24
ACTN1	11819.9	0.128979	0.0804702	1.60282	0.108975	0.21676
ACTN1-AS1	2.02914	0.444549	0.716509	0.620438	0.534969	0.703706
ACTN2	47.1695	-1.36233	0.318617	-4.27576	1.90487e-05	9.44415e-05
ACTN3	388.287	-1.59836	0.179876	-8.8859	6.34055e-19	9.7515e-18
ACTN4	7751.73	0.230816	0.0825533	2.79596	0.00517458	0.0159513
ACTN4P1	0.342724	-0.22978	0.449022	-0.511735	0.608837	NA
ACTR10	1079.27	0.248978	0.0989916	2.51514	0.0118985	0.0332471
ACTR1A	3775.12	0.169615	0.0706494	2.4008	0.0163592	0.0439513
ACTR1B	1111.31	0.628118	0.0938433	6.69327	2.18236e-11	2.05151e-10
ACTR2	8524.28	-0.067465	0.0919044	-0.734078	0.462901	0.640391
ACTR3	5874.43	0.280621	0.0879504	3.19067	0.00141943	0.00498452
ACTR3B	820.548	0.163695	0.102625	1.59508	0.110695	0.219602
ACTR3C	1.00158	-0.793927	0.663661	-1.19628	0.231585	NA
ACTR5	581.751	-0.320878	0.109622	-2.92712	0.00342116	0.0109679
ACTR6	733.841	-0.367451	0.119688	-3.07009	0.00213998	0.007207
ACTR8	1024.07	0.0931715	0.0920829	1.01182	0.311624	0.485406
ACTRT2	0.612026	-0.344653	0.552752	-0.623521	0.532942	NA
ACTRT3	65.8684	-1.56766	0.271489	-5.7743	7.72752e-09	5.79256e-08
ACVR1	328.67	-0.35671	0.137931	-2.58614	0.00970573	0.027839
ACVR1B	1400.78	0.146879	0.08529	1.72211	0.085049	0.177183
ACVR1C	14.8233	0.491341	0.489613	1.00353	0.315606	0.489653
ACVR2A	306.438	-0.116509	0.150472	-0.774294	0.438757	0.61784
ACVR2B	1756.07	-0.342803	0.102254	-3.35247	0.000800928	0.00296599
ACVR2B-AS1	85.0587	-1.18887	0.255159	-4.65932	3.17263e-06	1.75321e-05
ACVRL1	17.1991	0.899703	0.451249	1.99381	0.0461731	0.106846
ACY1	11.8365	-1.02386	0.515413	-1.98649	0.0469791	0.10838
ACY3	0.708863	-0.733519	0.605042	-1.21235	0.22538	NA
ACYP1	188.945	0.0606556	0.170343	0.35608	0.721781	0.842794
ACYP2	84.6881	0.509391	0.231105	2.20415	0.0275138	0.0687101
AD000684.2	21.0133	-0.62222	0.429863	-1.44748	0.147761	0.276425
AD000864.6	6.57485	-1.14546	0.6497	-1.76306	0.0778906	0.165022
AD001527.7	0.869347	0.500295	0.644691	0.776024	0.437735	NA
ADA	428.75	-1.26673	0.121467	-10.4285	1.83699e-25	3.77551e-24
ADAD2	3.0401	-2.24031	0.716876	-3.1251	0.00177746	0.00611082
ADAL	509.046	0.15212	0.121829	1.24864	0.211798	0.365409
ADAM10	3876.2	-0.0112453	0.095149	-0.118186	0.90592	0.953849
ADAM11	268.693	0.628397	0.164344	3.82366	0.000131484	0.000565131
ADAM12	79.7084	1.33224	0.281544	4.7319	2.22429e-06	1.26064e-05
ADAM15	1349.74	0.57766	0.090466	6.38539	1.70962e-10	1.49927e-09
ADAM17	1110.29	0.313122	0.0892707	3.50755	0.000452254	0.00175408
ADAM18	0.507105	0.43737	0.532961	0.820642	0.41185	NA
ADAM19	1249.44	0.0736317	0.0904002	0.814508	0.415354	0.594399
ADAM1B	5.24868	0.499581	0.655533	0.762098	0.446001	0.624654
ADAM20	0.863154	0.123727	0.597345	0.207128	0.83591	NA
ADAM20P1	10.7171	-0.669684	0.527259	-1.27012	0.204041	0.355144
ADAM21	4.11968	0.172993	0.705548	0.24519	0.806309	0.894912
ADAM21P1	3.37916	1.27653	0.714495	1.78661	0.0740002	0.158373
ADAM22	593.343	-0.274788	0.11771	-2.33446	0.0195719	0.0512784
ADAM23	1063.58	-0.944486	0.101982	-9.2613	2.01961e-20	3.3697e-19
ADAM28	6.40306	-1.97258	0.657861	-2.99848	0.00271331	0.00891347
ADAM29	0.523958	-0.466451	0.535808	-0.870556	0.383996	NA
ADAM32	5.23702	0.245118	0.663371	0.369503	0.711753	0.837272
ADAM33	345.269	-0.741259	0.182196	-4.06848	4.73214e-05	0.000220359
ADAM3B	0.195881	0.165172	0.449234	0.367675	0.713115	NA
ADAM8	39.7242	0.129557	0.336896	0.38456	0.700563	0.82971
ADAM9	1146.24	0.0791532	0.1173	0.674795	0.499806	0.674067
ADAMTS1	793.227	0.58127	0.0985325	5.89927	3.65116e-09	2.81533e-08
ADAMTS10	1555.82	0.283699	0.141145	2.00999	0.0444325	0.103464
ADAMTS12	892.468	0.560742	0.140622	3.98757	6.67523e-05	0.00030304
ADAMTS13	305.877	0.574404	0.159036	3.61178	0.000304106	0.00121923
ADAMTS14	28.7713	-2.21179	0.406756	-5.43764	5.39911e-08	3.71489e-07
ADAMTS15	723.518	3.1741	0.154314	20.5691	5.19406e-94	5.48726e-92
ADAMTS16	135.825	-1.19961	0.582401	-2.05977	0.0394204	0.0934874
ADAMTS17	320.828	2.88078	0.155501	18.5258	1.27906e-76	1.02181e-74
ADAMTS18	1.60696	0.722337	0.710078	1.01726	0.309027	0.482797
ADAMTS19	1103.76	0.439455	0.122432	3.58939	0.000331454	0.00132091
ADAMTS19-AS1	39.1963	-0.131	0.348933	-0.37543	0.707341	0.834397
ADAMTS2	55.436	-0.735149	0.294742	-2.49421	0.0126238	0.0350225
ADAMTS20	162.513	0.533223	0.208456	2.55796	0.0105287	0.0298437
ADAMTS3	371.217	0.100281	0.171474	0.584819	0.558669	0.723598
ADAMTS4	566.233	-1.42277	0.136148	-10.4502	1.46251e-25	3.02235e-24
ADAMTS5	22.2947	-3.49857	0.506048	-6.9135	4.72838e-12	4.71129e-11
ADAMTS6	150.226	0.873744	0.184444	4.73718	2.1671e-06	1.23038e-05
ADAMTS7	1526.48	-0.41313	0.133923	-3.08484	0.00203659	0.00689477
ADAMTS7P1	2.3807	-0.028988	0.71416	-0.0405903	0.967623	0.984342
ADAMTS7P3	2.54859	-0.678562	0.714022	-0.950338	0.34194	0.51918
ADAMTS8	284.04	-6.08504	0.292245	-20.8217	2.74973e-96	3.00319e-94
ADAMTS9	180.011	1.8063	0.17894	10.0945	5.84513e-24	1.13528e-22
ADAMTS9-AS1	7.34438	0.274162	0.591762	0.463298	0.643151	0.789593
ADAMTS9-AS2	2.78698	0.384582	0.707727	0.543404	0.586851	0.747383
ADAMTSL1	25.3034	-0.838032	0.412085	-2.03364	0.041988	0.0986558
ADAMTSL2	122.288	0.625874	0.236741	2.64371	0.0082003	0.0239751
ADAMTSL3	20.5696	-0.714459	0.426953	-1.67339	0.0942506	0.192712
ADAMTSL4	66.3237	-1.25889	0.303822	-4.1435	3.42049e-05	0.000163317
ADAMTSL4-AS1	1.4591	1.33112	0.685284	1.94244	0.0520837	0.117987
ADAMTSL5	2.3609	0.788972	0.716452	1.10122	0.270801	0.438432
ADAP1	6.02495	0.0908342	0.62416	0.14553	0.884292	0.942223
ADAP2	7.0836	-0.367471	0.602804	-0.609602	0.542125	0.709527
ADAR	14963.3	-0.483598	0.0703614	-6.87305	6.28435e-12	6.17725e-11
ADARB1	492.935	0.602861	0.128621	4.68709	2.77113e-06	1.54691e-05
ADARB2	16.8309	-2.08024	0.517878	-4.01685	5.89824e-05	0.000269879
ADARB2-AS1	3.03277	-0.688709	0.708839	-0.971601	0.331249	0.507583
ADAT1	842.837	0.0601674	0.104869	0.573738	0.566145	0.730185
ADAT2	435.072	-0.0543805	0.125383	-0.433714	0.664496	0.804872
ADAT3	84.2608	-0.0664205	0.243794	-0.272446	0.785279	0.882477
ADCK1	342.218	-0.141233	0.130309	-1.08383	0.278439	0.447912
ADCK2	92.5542	-0.0273045	0.230025	-0.118702	0.905511	0.953685
ADCK3	698.927	-0.646363	0.133258	-4.85048	1.23161e-06	7.23417e-06
ADCK4	841.24	0.0640531	0.108999	0.587649	0.556768	0.722045
ADCK5	73.5368	1.28086	0.267781	4.78322	1.72507e-06	9.944e-06
ADCY1	1092.97	0.738707	0.104099	7.09621	1.28223e-12	1.32732e-11
ADCY10	4.62261	-1.15269	0.666816	-1.72864	0.0838729	0.175266
ADCY10P1	91.2205	0.473526	0.221076	2.14191	0.0322005	0.0786334
ADCY2	976.899	-0.952321	0.125594	-7.58251	3.38923e-14	3.94155e-13
ADCY3	766.752	-0.040663	0.126506	-0.321431	0.747884	0.859896
ADCY4	6.59143	-0.415724	0.632359	-0.657417	0.510913	0.683072
ADCY5	161.95	-0.0412349	0.189138	-0.218014	0.827418	0.907366
ADCY6	2266.28	1.57769	0.255141	6.18359	6.26589e-10	5.18329e-09
ADCY7	50.7641	0.632157	0.309659	2.04146	0.0412049	0.0970678
ADCY8	12.8925	-0.705992	0.521392	-1.35405	0.175719	0.316875
ADCY9	198.572	-1.21052	0.177226	-6.83037	8.46979e-12	8.25011e-11
ADCYAP1	0.195881	0.165172	0.449234	0.367675	0.713115	NA
ADCYAP1R1	731.6	-1.52852	0.112753	-13.5563	7.26816e-42	2.55153e-40
ADD1	5511.53	0.333906	0.0695198	4.80303	1.56282e-06	9.06185e-06
ADD2	5012.25	-1.03919	0.08264	-12.5749	2.90032e-36	8.61636e-35
ADD3	2700.16	-0.873199	0.0998021	-8.74931	2.14656e-18	3.18853e-17
ADD3-AS1	8.90834	0.364078	0.556285	0.654481	0.512802	0.684665
ADGB	2.29908	1.63574	0.704017	2.32344	0.0201554	0.0526182
ADGRA1	2.80186	0.149308	0.716631	0.208346	0.834958	0.91214
ADGRA2	160.001	-4.34351	0.257138	-16.8917	5.17631e-64	3.1124e-62
ADGRA3	3221.27	-0.0675699	0.0785057	-0.8607	0.389403	0.568673
ADGRB1	671.548	-0.633377	0.159072	-3.98171	6.84221e-05	0.000309997
ADGRB2	1209.42	-0.270531	0.103862	-2.60471	0.0091951	0.0265529
ADGRB3	18.3076	0.921059	0.489968	1.87984	0.0601305	0.133127
ADGRD1	12.8682	-1.73016	0.520532	-3.32383	0.000887914	0.00326194
ADGRD2	6.78083	-1.67014	0.639155	-2.61304	0.00897407	0.0259777
ADGRE2	4.15568	-1.11471	0.686589	-1.62355	0.104472	0.209625
ADGRE4P	1.10449	-0.251693	0.675649	-0.37252	0.709506	NA
ADGRE5	340.961	1.74877	0.162932	10.7332	7.11252e-27	1.54318e-25
ADGRF1	0.195881	0.165172	0.449234	0.367675	0.713115	NA
ADGRF2	2.86446	1.08004	0.716196	1.50802	0.131548	0.252358
ADGRF3	39.661	-1.0758	0.321741	-3.34369	0.000826728	0.00305303
ADGRF4	1.4193	1.2919	0.68136	1.89606	0.057952	0.129171
ADGRF5	49.5528	-3.34852	0.39333	-8.51325	1.69128e-17	2.38233e-16
ADGRF5P1	0.385722	0.0486105	0.495847	0.0980353	0.921904	NA
ADGRF5P2	1.3827	0.218782	0.698812	0.313077	0.754222	0.864109
ADGRG1	82.5705	1.38623	0.307792	4.50377	6.67591e-06	3.52638e-05
ADGRG2	147.157	-4.46164	0.274064	-16.2795	1.37911e-59	7.54937e-58
ADGRG3	1.99276	-0.361153	0.7086	-0.50967	0.610282	0.765957
ADGRG5	153.008	-4.34529	0.262163	-16.5748	1.06093e-61	6.0723e-60
ADGRG6	104.942	1.71233	0.234614	7.29849	2.9101e-13	3.16763e-12
ADGRL1	4073.97	-0.582291	0.107993	-5.39195	6.96968e-08	4.72901e-07
ADGRL2	7962.18	0.263416	0.1083	2.4323	0.0150034	0.0407837
ADGRL3	838.201	1.54121	0.0995195	15.4865	4.27788e-54	2.07542e-52
ADGRL4	121.144	1.29512	0.207677	6.23623	4.48253e-10	3.75615e-09
ADGRV1	1048.11	1.27525	0.306307	4.16331	3.13664e-05	0.000150527
ADH1A	1.8215	-0.177776	0.714127	-0.248941	0.803406	0.893517
ADH1B	0.467298	0.411162	0.52358	0.78529	0.432283	NA
ADH4	1.20708	-0.550044	0.676006	-0.813667	0.415836	NA
ADH5	8491.27	-0.0804929	0.0715823	-1.12448	0.26081	0.427088
ADH5P4	0.46408	-0.226159	0.547424	-0.413134	0.679509	NA
ADH6	24.4021	0.561292	0.406274	1.38156	0.167107	0.304773
ADHFE1	38.1188	0.555907	0.325814	1.70621	0.0879687	0.182241
ADI1	1582.85	0.145309	0.0965337	1.50527	0.132256	0.253225
ADIPOQ	0.582642	0.584186	0.580731	1.00595	0.31444	NA
ADIPOR1	2639.58	0.0879312	0.0779633	1.12785	0.259382	0.425398
ADIPOR2	3133.32	0.479166	0.0873637	5.48473	4.14099e-08	2.88149e-07
ADIRF-AS1	135.708	-0.467159	0.191453	-2.44007	0.0146843	0.0400317
ADK	996.917	-0.0452763	0.0982904	-0.460638	0.645058	0.79099
ADM	760.844	-4.04626	0.134744	-30.0293	4.06411e-198	1.95492e-195
ADM2	206.515	-2.04062	0.18627	-10.9552	6.27459e-28	1.4073e-26
ADM5	159.513	0.172288	0.197899	0.870586	0.38398	0.563009
ADNP	6737.05	0.0157934	0.0744242	0.212208	0.831945	0.910035
ADNP-AS1	55.8392	-0.336575	0.298719	-1.12673	0.259857	0.42596
ADNP2	2484.04	0.00916208	0.0917722	0.099835	0.920475	0.961002
ADO	1146.71	-0.0803293	0.0945795	-0.849331	0.395697	0.575485
ADORA1	264.788	0.845736	0.144699	5.84481	5.07148e-09	3.85788e-08
ADORA2A	3.59366	1.11154	0.710787	1.56382	0.117861	0.230961
ADORA2A-AS1	4.39967	0.549282	0.684671	0.802257	0.422405	0.601549
ADORA2B	95.7634	-0.774952	0.223193	-3.47211	0.000516378	0.00198306
ADORA3	0.349775	-0.0176811	0.482868	-0.0366169	0.97079	NA
ADPGK	1729.3	0.233966	0.081431	2.87318	0.0040636	0.0128131
ADPGK-AS1	3.14568	1.51027	0.712204	2.12056	0.0339585	0.0821985
ADPRH	152.185	-1.07549	0.178865	-6.01286	1.82277e-09	1.4427e-08
ADPRHL1	45.5216	0.331125	0.30992	1.06842	0.28533	0.456076
ADPRHL2	839.627	0.187212	0.110729	1.69072	0.090891	0.187078
ADPRM	141.766	-0.151668	0.184028	-0.824157	0.40985	0.588984
ADRA1A	0.73056	0.0297623	0.630628	0.0471946	0.962358	NA
ADRA1B	3.72322	0.975668	0.700693	1.39243	0.163792	0.300057
ADRA1D	74.0572	-5.13189	0.421147	-12.1855	3.71282e-34	1.0312e-32
ADRA2A	29.3391	0.822019	0.376523	2.18319	0.0290221	0.0719522
ADRA2B	163.67	-0.905394	0.227784	-3.97479	7.04419e-05	0.000318447
ADRA2C	958.474	4.76742	0.15038	31.7024	1.43796e-220	8.33574e-218
ADRB1	2.91413	2.06847	0.716322	2.88763	0.00388154	0.0122836
ADRB2	18.6323	0.0561067	0.452251	0.124061	0.901267	0.951165
ADRB3	0.713799	-0.737329	0.605719	-1.21728	0.223498	NA
ADRM1	1660.41	-0.266947	0.11689	-2.28374	0.0223869	0.0576385
ADSL	4545.71	-0.331255	0.0728913	-4.54451	5.5062e-06	2.93872e-05
ADSS	2134.15	-0.384163	0.10024	-3.83244	0.000126879	0.000546586
ADSSL1	209.902	-0.231107	0.183453	-1.25976	0.207757	0.359848
ADTRP	4.70505	0.656916	0.667625	0.983959	0.325136	0.500488
AE000662.92	0.366139	-0.280613	0.48831	-0.574661	0.565521	NA
AEBP1	1542.28	0.588005	0.0934392	6.29291	3.11567e-10	2.65607e-09
AEBP2	870.416	-0.63781	0.110062	-5.79498	6.83297e-09	5.13734e-08
AEN	2532.47	0.116717	0.087902	1.32781	0.184241	0.328781
AES	1758.15	-1.76401	0.378075	-4.66576	3.07472e-06	1.70417e-05
AF001548.5	1.54678	0.370661	0.699479	0.529911	0.596174	0.755259
AF003625.3	23.6342	0.555804	0.418111	1.32932	0.183742	0.328071
AF011889.2	4.36924	0.000309474	0.672907	0.000459906	0.999633	0.99973
AF011889.5	24.2292	0.506421	0.432851	1.16997	0.242015	0.404309
AF038458.3	1.02432	0.269752	0.67711	0.398386	0.690345	NA
AF038458.5	0.750079	0.331839	0.60462	0.548839	0.583116	NA
AF064858.10	1.64281	-0.658903	0.703156	-0.937064	0.348725	0.52602
AF064858.11	0.656063	0.324558	0.611858	0.530447	0.595802	NA
AF064858.6	1.89961	-0.462392	0.716299	-0.645529	0.518584	0.689356
AF064858.7	0.389582	-0.019106	0.495944	-0.0385246	0.969269	NA
AF064858.8	1.90776	0.105926	0.716752	0.147785	0.882512	0.941613
AF064860.5	3.19448	-0.934372	0.708344	-1.31909	0.187138	0.332361
AF064860.7	14.9388	-1.32496	0.514554	-2.57497	0.010025	0.0286276
AF111168.1	6.22763	0.264153	0.624138	0.423229	0.672128	0.810295
AF121898.3	0.386761	0.248891	0.493536	0.504303	0.614049	NA
AF127577.12	0.653948	-0.041873	0.590135	-0.0709549	0.943434	NA
AF127577.13	1.28476	0.123443	0.680327	0.181447	0.856017	NA
AF127936.5	0.524509	0.413224	0.533354	0.774765	0.438479	NA
AF127936.7	2.78695	0.133979	0.713323	0.187823	0.851015	0.921974
AF127936.9	32.4562	0.802533	0.354732	2.26237	0.0236747	0.0604311
AF129075.5	11.979	0.0472769	0.509132	0.0928578	0.926017	0.964231
AF131215.2	156.358	0.0696877	0.179626	0.387959	0.698046	0.828074
AF131215.3	2.41272	-0.0417438	0.713121	-0.0585368	0.953321	0.97782
AF131215.4	0.372179	0.0473982	0.491186	0.0964973	0.923126	NA
AF131215.8	11.4355	-0.842737	0.519972	-1.62074	0.105074	0.210595
AF131215.9	78.1034	-0.274113	0.251831	-1.08848	0.276383	0.445492
AF131216.1	16.2547	0.256258	0.479355	0.534588	0.592935	0.752632
AF131216.5	2.94538	-0.443943	0.711959	-0.623551	0.532922	0.701871
AF131216.6	12.2453	-0.0753398	0.537666	-0.140124	0.888562	0.944058
AF131217.1	0.700807	0.314227	0.596604	0.526692	0.598407	NA
AF146191.4	9.63029	0.024338	0.550004	0.0442505	0.964705	0.98302
AF165138.7	1.41773	-1.34384	0.682564	-1.96882	0.0489742	0.112145
AF186192.5	0.349775	-0.0176811	0.482868	-0.0366169	0.97079	NA
AF196972.4	0.575563	-0.128299	0.54553	-0.235182	0.814068	NA
AF196972.9	2.3757	-0.0885261	0.714445	-0.123909	0.901387	0.951193
AF213884.2	0.4456	-0.221493	0.54357	-0.407478	0.683657	NA
AF224669.3	0.271417	0.179517	0.450331	0.398633	0.690163	NA
AF230666.2	5.54231	0.610059	0.645847	0.944589	0.344869	0.522341
AFAP1	803.073	0.545524	0.113707	4.79764	1.60547e-06	9.29247e-06
AFAP1-AS1	3.04638	0.101652	0.699533	0.145314	0.884463	0.942316
AFAP1L1	227.928	0.43688	0.190151	2.29755	0.0215875	0.0558857
AFAP1L2	611.346	3.95726	0.155226	25.4936	2.32213e-143	5.3029e-141
AFF1	1335.54	0.534114	0.0971701	5.49669	3.86992e-08	2.70118e-07
AFF2	188.876	1.27276	0.209492	6.07548	1.23614e-09	9.95958e-09
AFF3	358.532	1.32702	0.142669	9.30139	1.38617e-20	2.33174e-19
AFF4	2400.22	0.119062	0.106121	1.12194	0.261886	0.428201
AFG3L1P	877.801	0.310054	0.115548	2.68334	0.00728908	0.021595
AFG3L2	2116.9	-0.261229	0.0784116	-3.33151	0.000863761	0.00317785
AFM	2.18041	0.253719	0.716221	0.354247	0.723154	0.843321
AFMID	495.585	-0.332832	0.111321	-2.98985	0.00279117	0.009144
AFP	43.0316	-2.32382	0.44389	-5.23513	1.64871e-07	1.0748e-06
AFTPH	331.41	-0.780558	0.148828	-5.24471	1.56529e-07	1.02337e-06
AGA	200.764	0.0991849	0.163459	0.606789	0.543991	0.711145
AGAP1	1403.93	0.759567	0.0913672	8.31335	9.30378e-17	1.25576e-15
AGAP1-IT1	2.16797	0.549921	0.716273	0.767753	0.442634	0.621332
AGAP10P	23.5935	0.451254	0.407816	1.10651	0.268504	0.435775
AGAP11	1.46075	-0.534919	0.703709	-0.760143	0.447169	0.625749
AGAP12P	5.91341	-0.00247778	0.642842	-0.00385441	0.996925	0.998825
AGAP13P	5.80879	0.847882	0.645637	1.31325	0.189099	0.334807
AGAP14P	13.5669	-0.211312	0.508327	-0.415701	0.677629	0.814105
AGAP2	41.6747	-0.564111	0.314228	-1.79523	0.0726176	0.155837
AGAP2-AS1	2.29318	0.56609	0.71683	0.789713	0.429695	0.608681
AGAP3	1795.9	-0.193424	0.114125	-1.69484	0.0901057	0.185834
AGAP4	175.641	-0.0107192	0.166721	-0.0642944	0.948736	0.975709
AGAP5	24.339	-0.0139982	0.390813	-0.0358181	0.971427	0.98657
AGAP6	373.965	-0.0266617	0.139812	-0.190697	0.848763	0.92046
AGAP7P	6.90167	0.25737	0.623284	0.412926	0.679661	0.815074
AGAP9	185.775	0.387591	0.172743	2.24375	0.0248484	0.0630001
AGBL1	1.37357	1.05737	0.651427	1.62316	0.104556	0.209762
AGBL2	27.5401	-0.525648	0.403271	-1.30346	0.192418	0.339195
AGBL3	62.4897	-0.380217	0.284853	-1.33478	0.181947	0.325612
AGBL4	1.56522	0.643389	0.698172	0.921533	0.356772	0.535265
AGBL5	1757.6	0.498877	0.0930548	5.36111	8.27099e-08	5.57017e-07
AGBL5-AS1	0.820346	-0.578899	0.621371	-0.931648	0.351518	NA
AGBL5-IT1	5.92566	-0.012551	0.648885	-0.0193424	0.984568	0.992522
AGER	244.635	0.776626	0.165248	4.69976	2.60462e-06	1.45936e-05
AGFG1	2586.45	-0.239805	0.0814284	-2.94498	0.00322979	0.0104075
AGFG2	122.337	1.02056	0.197515	5.16701	2.37862e-07	1.52556e-06
AGGF1	1079.21	0.0142597	0.104245	0.136791	0.891196	0.945036
AGGF1P3	0.467298	0.411162	0.52358	0.78529	0.432283	NA
AGK	1010.47	-0.000598993	0.0914071	-0.00655303	0.994771	0.997773
AGKP1	0.195881	0.165172	0.449234	0.367675	0.713115	NA
AGL	243.867	-0.238013	0.168045	-1.41636	0.156669	0.289471
AGMAT	131.349	-1.20354	0.190688	-6.31155	2.76262e-10	2.3739e-09
AGMO	0.560944	-0.184796	0.56884	-0.324864	0.745284	NA
AGO1	1879.09	-0.345967	0.0858809	-4.02845	5.61454e-05	0.000258415
AGO2	2142.08	-0.271229	0.098531	-2.75272	0.00591017	0.0179496
AGO3	533.339	0.00193284	0.127478	0.0151621	0.987903	0.993882
AGO4	637.859	0.178202	0.139612	1.27641	0.201811	0.351906
AGPAT1	1440.58	0.0485807	0.0868495	0.559366	0.575912	0.738442
AGPAT2	286.683	-1.72414	0.161444	-10.6795	1.27006e-26	2.71908e-25
AGPAT3	56.5524	0.333538	0.284172	1.17372	0.240507	0.4025
AGPAT4	1563.77	0.54689	0.0967776	5.65099	1.59522e-08	1.1589e-07
AGPAT4-IT1	21.6779	0.636206	0.423124	1.50359	0.132686	0.253745
AGPAT5	3081.02	-0.417825	0.0911899	-4.58192	4.60719e-06	2.48709e-05
AGPS	2465.56	-0.169281	0.106664	-1.58705	0.1125	0.222617
AGR2	39.2997	3.82871	0.700297	5.46727	4.57017e-08	3.16649e-07
AGRN	7729.54	1.3151	0.127883	10.2836	8.35292e-25	1.67711e-23
AGT	8.68701	-0.275815	0.595075	-0.463496	0.643009	0.789504
AGTPBP1	1833.44	-0.00399588	0.0980781	-0.0407418	0.967502	0.984263
AGTR1	1.96081	0.612642	0.714831	0.857045	0.39142	0.57077
AGTRAP	899.594	-0.00323884	0.105963	-0.0305658	0.975616	0.988494
AGXT2	0.403125	-0.0196102	0.500339	-0.0391938	0.968736	NA
AHCTF1	2936.84	0.140719	0.1033	1.36224	0.173123	0.313192
AHCY	7400.66	-0.333864	0.0700274	-4.76763	1.86407e-06	1.06745e-05
AHCYL1	3380.27	0.0287542	0.0801583	0.358718	0.719806	0.841897
AHCYL2	764.373	-0.138873	0.105506	-1.31626	0.188086	0.33351
AHCYP2	1.56007	0.0697792	0.700029	0.0996804	0.920598	0.961023
AHDC1	1901.36	1.32218	0.120757	10.9491	6.71254e-28	1.50255e-26
AHI1	501.705	0.522498	0.11758	4.44377	8.8398e-06	4.58477e-05
AHNAK	1526.03	5.86761	0.281546	20.8407	1.8521e-96	2.04255e-94
AHNAK2	33.3987	1.19868	0.369711	3.24222	0.00118601	0.00424267
AHR	17.0944	-0.707729	0.45784	-1.5458	0.122152	0.237702
AHRR	29.9275	0.504104	0.392964	1.28282	0.199554	0.34881
AHSA1	3940.31	-0.216821	0.0801927	-2.70374	0.00685629	0.0204738
AHSA2	1173.81	-0.294053	0.0976234	-3.01212	0.00259433	0.00856493
AHSG	7.61724	-3.13098	0.674433	-4.64238	3.44411e-06	1.89267e-05
AHSP	12.2532	-2.41539	0.579481	-4.16819	3.07026e-05	0.000147623
AICDA	1.46952	-0.935225	0.695235	-1.34519	0.178563	0.32075
AIDA	3624.64	-0.141579	0.0995478	-1.42223	0.154961	0.287042
AIF1	267.376	-1.5217	0.227744	-6.6816	2.36342e-11	2.21802e-10
AIF1L	7146.52	-0.676325	0.0738179	-9.16206	5.0915e-20	8.3051e-19
AIFM1	1878.45	-0.342424	0.0878016	-3.89997	9.6204e-05	0.000424221
AIFM2	162.71	-1.11894	0.248594	-4.50106	6.7614e-06	3.5682e-05
AIFM3	10.1206	-0.978963	0.554135	-1.76665	0.0772864	0.164014
AIG1	544.784	-0.253468	0.119648	-2.11845	0.0341367	0.0825824
AIM1	31.4762	-1.29053	0.356182	-3.62324	0.000290935	0.00117037
AIM1L	209.785	0.602881	0.177277	3.40079	0.000671915	0.00252887
AIM2	95.6105	0.130321	0.21971	0.593149	0.553081	0.718955
AIMP1	1411.55	-0.283827	0.0916753	-3.096	0.0019615	0.00667153
AIMP2	933.819	-0.0231831	0.0954205	-0.242957	0.808039	0.895848
AIP	509.465	0.519867	0.133024	3.90807	9.30369e-05	0.000411701
AIPL1	2.30874	-0.40145	0.714705	-0.5617	0.57432	0.736903
AIRE	0.367242	0.0469513	0.489439	0.0959287	0.923577	NA
AJ003147.11	0.864383	0.0956583	0.644611	0.148397	0.88203	NA
AJ003147.9	0.274238	-0.0308478	0.450934	-0.0684086	0.94546	NA
AJ006998.2	8.17124	2.42998	0.667509	3.64036	0.000272253	0.00110115
AJ011931.1	0.940627	-0.540417	0.65507	-0.824976	0.409385	NA
AJ011932.1	2.66907	0.315117	0.71586	0.440194	0.659797	0.801127
AJAP1	894.827	1.96824	0.171277	11.4916	1.45472e-30	3.58261e-29
AJUBA	1588.85	0.936551	0.0989654	9.46342	2.98037e-21	5.15927e-20
AK1	49.281	0.215049	0.294328	0.730645	0.464996	0.642346
AK2	3638.95	-0.335693	0.0713501	-4.70487	2.54023e-06	1.42576e-05
AK3	931.847	1.10924	0.101905	10.885	1.35883e-27	3.01773e-26
AK3P3	15.3674	-0.261852	0.470147	-0.556958	0.577556	0.739628
AK3P5	0.85688	0.517711	0.648558	0.798249	0.424726	NA
AK4	3148.7	-3.5213	0.295532	-11.9151	9.8736e-33	2.61998e-31
AK4P1	19.934	-3.22548	0.511273	-6.30874	2.81323e-10	2.41555e-09
AK5	72.3763	-3.00081	0.289495	-10.3657	3.55228e-25	7.24166e-24
AK6	577.859	-0.343786	0.122099	-2.81563	0.00486819	0.0150829
AK7	61.3983	0.319682	0.282597	1.13123	0.257959	0.423673
AK8	20.0344	1.22615	0.440339	2.78456	0.00536008	0.0164571
AK9	86.2741	0.067972	0.252329	0.269378	0.787639	0.884202
AKAIN1	5.86094	2.41688	0.705887	3.42389	0.000617325	0.00233738
AKAP1	1895.7	-0.916301	0.0876119	-10.4586	1.33775e-25	2.77467e-24
AKAP10	776.758	0.0932743	0.0965779	0.965793	0.334148	0.510709
AKAP11	1648.73	0.34395	0.106033	3.24381	0.00117941	0.00422236
AKAP12	5526.32	0.42829	0.105182	4.07187	4.66364e-05	0.000217483
AKAP13	1526.64	0.348999	0.091679	3.80674	0.000140808	0.000602343
AKAP14	4.58064	0.63398	0.698992	0.906992	0.364411	0.543802
AKAP17BP	1.55262	-1.18836	0.700374	-1.69675	0.0897432	0.185255
AKAP2	12.6168	-1.69146	0.529955	-3.19169	0.00141441	0.00496767
AKAP3	53.5708	0.917111	0.29037	3.15842	0.00158626	0.00552066
AKAP4	0.274238	-0.0308478	0.450934	-0.0684086	0.94546	NA
AKAP5	212.758	0.555583	0.214624	2.58864	0.00963557	0.0276623
AKAP6	42.464	1.39614	0.331292	4.21421	2.50657e-05	0.000122078
AKAP7	277.255	-1.42887	0.165197	-8.64953	5.17133e-18	7.55743e-17
AKAP8	1428.76	-0.0860154	0.101228	-0.84972	0.395481	0.575282
AKAP8L	1706.65	-0.0128126	0.0875498	-0.146347	0.883648	0.941907
AKAP9	1184.73	0.445161	0.108399	4.10667	4.01396e-05	0.000189021
AKIP1	438.042	-0.0404761	0.116971	-0.346037	0.729315	0.846899
AKIRIN1	5643.28	-0.236281	0.0761516	-3.10276	0.00191722	0.00654158
AKIRIN2	1448.84	-0.373733	0.0851214	-4.39059	1.13044e-05	5.79394e-05
AKNA	1568.79	-1.42265	0.139579	-10.1924	2.14295e-24	4.22755e-23
AKNAD1	0.444894	0.373506	0.515036	0.725204	0.468327	NA
AKR1A1	2559.46	-0.324318	0.0781333	-4.15083	3.31276e-05	0.000158508
AKR1B1	4615.23	0.119357	0.0759042	1.57247	0.115841	0.227932
AKR1B10	0.386761	0.248891	0.493536	0.504303	0.614049	NA
AKR1B15	0.352596	-0.22978	0.449022	-0.511735	0.608837	NA
AKR1C1	43.9284	0.960209	0.310763	3.08984	0.00200263	0.00679607
AKR1C2	10.0973	1.10002	0.561218	1.96006	0.0499882	0.11403
AKR1C3	37.9748	-2.62851	0.378868	-6.93781	3.98238e-12	3.99086e-11
AKR1C4	0.560238	0.465712	0.541146	0.860604	0.389456	NA
AKR1C6P	0.556008	-0.156311	0.539092	-0.289953	0.771852	NA
AKR1D1	1.06357	-0.699656	0.66804	-1.04733	0.294949	NA
AKR1E2	56.5374	-0.326728	0.27358	-1.19427	0.232373	0.391896
AKR7A2	929.712	0.457626	0.100615	4.5483	5.40807e-06	2.88771e-05
AKR7A2P1	3.69745	0.198471	0.694196	0.285901	0.774954	0.876615
AKR7A3	23.5417	0.450873	0.399689	1.12806	0.259295	0.425286
AKR7L	33.4506	0.336747	0.343087	0.981521	0.326336	0.501683
AKT1	1618.73	0.797138	0.0935937	8.51701	1.63726e-17	2.30912e-16
AKT1S1	1481.17	-0.213549	0.112722	-1.89448	0.058161	0.129595
AKT2	3163.34	-0.0224245	0.100248	-0.223689	0.822999	0.904891
AKT3	972.015	-0.160408	0.132604	-1.20968	0.226401	0.384068
AKTIP	283.315	-0.454454	0.147826	-3.07426	0.00211027	0.00711863
AL022341.3	5.43053	0.199638	0.653337	0.305566	0.759935	0.867371
AL022345.7	0.342724	-0.22978	0.449022	-0.511735	0.608837	NA
AL022393.9	1.60767	0.139564	0.714046	0.195455	0.845037	0.918083
AL022476.2	3.45855	0.709311	0.69889	1.01491	0.310149	0.483976
AL022578.1	0.966185	0.178657	0.652959	0.273611	0.784383	NA
AL023806.1	9.31172	0.45492	0.568543	0.800151	0.423624	0.602534
AL023875.1	4.68435	0.462692	0.66646	0.694253	0.487524	0.663692
AL035610.2	2.25126	0.333948	0.715675	0.46662	0.640772	0.787999
AL109761.5	2.23642	0.0740683	0.715774	0.10348	0.917582	0.959628
AL121578.2	2.88069	1.0501	0.715286	1.46808	0.142083	0.267773
AL132709.1	14.3784	-2.37734	0.531998	-4.4687	7.86978e-06	4.11444e-05
AL133243.1	9.81691	0.193471	0.554	0.349227	0.726919	0.84538
AL133243.2	6.60912	0.0321286	0.609611	0.0527034	0.957968	0.979767
AL133243.4	0.409165	0.318765	0.505027	0.631183	0.527921	NA
AL133245.2	0.444894	0.373506	0.515036	0.725204	0.468327	NA
AL133493.2	12.8671	-1.66305	0.524637	-3.1699	0.00152491	0.00532598
AL135787.1	5.57512	-0.697168	0.645479	-1.08008	0.280107	0.449954
AL136097.1	10.36	-0.227875	0.543456	-0.419307	0.674992	0.812146
AL136419.6	12.0377	-0.14115	0.516861	-0.273092	0.784783	0.882398
AL137860.1	3.56985	-2.09732	0.711295	-2.94859	0.00319227	0.0102998
AL138706.1	3.71587	-0.0849588	0.690797	-0.122987	0.902118	0.951485
AL163953.2	0.91127	0.868924	0.625433	1.38931	0.164737	NA
AL163953.3	9.90499	0.609256	0.543724	1.12052	0.262491	0.428967
AL355480.1	1.97187	0.386132	0.715037	0.540017	0.589185	0.74951
AL355480.3	1.27303	-0.100726	0.69609	-0.144703	0.884946	NA
AL355480.4	0.195881	0.165172	0.449234	0.367675	0.713115	NA
AL356053.1	6.83643	0.745395	0.614595	1.21282	0.225197	0.382463
AL358852.1	4.26532	0.149366	0.679064	0.219958	0.825904	0.906454
AL360294.1	11.0893	-1.03441	0.543181	-1.90435	0.0568642	0.127135
AL365181.1	5.45261	0.446445	0.65353	0.683129	0.494526	0.669682
AL450992.2	23.2537	-0.503399	0.418479	-1.20293	0.229005	0.387323
AL590235.1	5.78131	0.300095	0.62787	0.477958	0.63268	0.782175
AL590762.11	0.869347	0.500295	0.644691	0.776024	0.437735	NA
AL590762.6	0.928187	-0.102974	0.657182	-0.15669	0.87549	NA
AL590762.7	0.352596	-0.22978	0.449022	-0.511735	0.608837	NA
AL590763.16	1.75662	-0.048821	0.715518	-0.0682317	0.945601	0.973784
AL590763.5	0.637556	-0.0881954	0.610497	-0.144465	0.885133	NA
AL591893.1	2.00993	0.697152	0.716756	0.972648	0.330728	0.507049
AL592528.1	0.271417	0.179517	0.450331	0.398633	0.690163	NA
AL691477.1	0.274238	-0.0308478	0.450934	-0.0684086	0.94546	NA
ALAD	506.616	0.211398	0.117527	1.79873	0.0720618	0.15482
ALAS1	1623.83	-0.412708	0.0838722	-4.92067	8.62489e-07	5.14897e-06
ALAS2	2.90392	0.0280406	0.712335	0.0393644	0.9686	0.984937
ALB	1.19286	0.410031	0.688404	0.595626	0.551425	NA
ALCAM	1121.11	-2.36597	0.108177	-21.8714	4.86902e-106	6.29021e-104
ALDH16A1	896.775	-0.273353	0.138214	-1.97775	0.0479565	0.110261
ALDH18A1	4342.01	-0.299721	0.0717904	-4.17494	2.98062e-05	0.000143649
ALDH1A1	18.3688	-4.74977	0.632453	-7.51006	5.90983e-14	6.7719e-13
ALDH1A2	83.0295	4.50632	0.380393	11.8465	2.24392e-32	5.88522e-31
ALDH1A3	5.14451	0.304804	0.655326	0.465117	0.641848	0.78885
ALDH1B1	1851.32	-0.705054	0.0877871	-8.03141	9.63592e-16	1.24048e-14
ALDH1L1	10.0484	0.281579	0.539422	0.522002	0.601669	0.759358
ALDH1L1-AS2	0.409165	0.318765	0.505027	0.631183	0.527921	NA
ALDH1L2	58.4392	0.269631	0.284133	0.948961	0.342641	0.519929
ALDH2	752.815	0.245103	0.105613	2.32077	0.0202991	0.0529291
ALDH3A1	11.2329	-0.950776	0.521923	-1.82168	0.0685035	0.148388
ALDH3A2	1754.49	-0.526342	0.0806105	-6.52945	6.60137e-11	5.99613e-10
ALDH3B1	23.2955	-0.216821	0.433392	-0.500288	0.616873	0.77115
ALDH4A1	507.619	0.00142235	0.11913	0.0119395	0.990474	0.995361
ALDH5A1	306.514	0.497729	0.136873	3.63642	0.000276456	0.0011161
ALDH6A1	468.906	0.0705265	0.146277	0.482143	0.629704	0.780202
ALDH7A1	4335.84	0.163933	0.0878015	1.86709	0.0618888	0.136324
ALDH7A1P1	0.195881	0.165172	0.449234	0.367675	0.713115	NA
ALDH8A1	2.16193	0.266526	0.715788	0.372354	0.70963	0.835742
ALDH9A1	3808.77	-0.077444	0.0718579	-1.07774	0.281151	0.451066
ALDOA	17342.5	0.0701025	0.067218	1.04291	0.296989	0.469665
ALDOB	0.53468	-0.185707	0.564517	-0.328967	0.742181	NA
ALDOC	523.12	-0.761437	0.122369	-6.22249	4.89324e-10	4.07725e-09
ALG1	792.279	-0.292224	0.112157	-2.60548	0.00917451	0.0265104
ALG10	136.696	0.113463	0.201565	0.562909	0.573497	0.736306
ALG10B	159.422	0.577448	0.187897	3.07321	0.00211767	0.00714147
ALG11	353.11	0.182128	0.152509	1.19421	0.232395	0.391896
ALG12	372.558	-0.435867	0.135575	-3.21494	0.0013047	0.00462475
ALG13	919.084	0.0621427	0.0950144	0.654034	0.51309	0.68489
ALG13-AS1	1.13862	0.0299479	0.688228	0.0435144	0.965291	NA
ALG14	133.379	0.209505	0.192556	1.08802	0.276585	0.445658
ALG1L	25.063	-0.201326	0.384911	-0.523046	0.600942	0.758723
ALG1L10P	5.14941	-0.226522	0.654108	-0.346306	0.729113	0.846755
ALG1L11P	1.53344	-0.524202	0.707132	-0.741308	0.458507	0.636322
ALG1L12P	4.46551	0.0798555	0.693685	0.115118	0.908352	0.955075
ALG1L13P	32.7686	-0.211754	0.339562	-0.623611	0.532883	0.701871
ALG1L2	8.68549	0.491813	0.567534	0.866578	0.386173	0.564905
ALG1L5P	0.658885	-0.051992	0.613792	-0.0847061	0.932495	NA
ALG1L6P	35.8673	0.413423	0.347093	1.1911	0.233614	0.393412
ALG1L7P	18.6645	-0.334494	0.430986	-0.776114	0.437682	0.617017
ALG1L8P	6.82397	-0.130344	0.602875	-0.216204	0.828829	0.908297
ALG1L9P	36.6907	-0.232856	0.32356	-0.719668	0.471729	0.648714
ALG2	856.349	-0.171766	0.0990145	-1.73475	0.0827845	0.173286
ALG3	1210.39	-0.565631	0.104373	-5.41932	5.98266e-08	4.09494e-07
ALG5	625.689	0.030974	0.106849	0.289885	0.771904	0.874204
ALG6	1322.19	-0.403459	0.0987913	-4.08395	4.42757e-05	0.000207245
ALG8	1929.65	-0.0392757	0.0876657	-0.448017	0.654141	0.797036
ALG9	255.406	0.978626	0.168171	5.81924	5.91161e-09	4.46989e-08
ALK	6.7688	1.51606	0.641645	2.36277	0.0181389	0.0480569
ALKBH1	497.804	-0.151228	0.113412	-1.33345	0.182385	0.326267
ALKBH2	525.763	-1.00126	0.115912	-8.6381	5.71544e-18	8.33643e-17
ALKBH3	334.513	-0.175997	0.129596	-1.35804	0.174449	0.315088
ALKBH3-AS1	7.43535	0.10242	0.618117	0.165697	0.868395	0.93368
ALKBH4	391.121	-0.107873	0.131837	-0.818235	0.413223	0.592325
ALKBH5	1385.78	0.154047	0.0844902	1.82325	0.0682653	0.147957
ALKBH6	115.174	-0.703613	0.202333	-3.4775	0.000506113	0.00194695
ALKBH7	521.386	0.0546078	0.128606	0.424612	0.671119	0.809641
ALKBH8	593.059	-0.426419	0.116516	-3.65976	0.000252454	0.00102671
ALLC	1.30382	-0.0532503	0.666348	-0.0799136	0.936306	NA
ALMS1	2016.32	0.235479	0.128767	1.82872	0.0674423	0.146525
ALMS1-IT1	9.81825	0.129212	0.554722	0.232931	0.815815	0.900232
ALMS1P1	3.96719	0.00597044	0.681014	0.008767	0.993005	0.996753
ALOX12	62.2623	-1.07033	0.279496	-3.8295	0.000128403	0.000552731
ALOX12-AS1	36.4242	0.292006	0.32986	0.885242	0.376026	0.554981
ALOX12B	1.25893	0.457074	0.690721	0.661734	0.508142	NA
ALOX12P2	193.279	-1.48225	0.181274	-8.17686	2.91335e-16	3.85402e-15
ALOX15	11.2254	-1.58545	0.552556	-2.86931	0.00411371	0.0129585
ALOX15B	2.3278	-0.526232	0.716438	-0.734511	0.462637	0.640065
ALOX5	5.35191	-0.464422	0.641592	-0.723858	0.469153	0.646272
ALOX5AP	0.75894	0.425151	0.633482	0.671133	0.502136	NA
ALOXE3	18.2347	3.7327	0.586624	6.36302	1.97822e-10	1.72678e-09
ALPK1	8.99163	-0.058424	0.558537	-0.104602	0.916692	0.959341
ALPK2	75.4618	4.30098	0.369039	11.6545	2.17548e-31	5.51381e-30
ALPK3	25.7509	-0.766128	0.384732	-1.99133	0.0464444	0.107364
ALPL	4520.91	0.599694	0.0741179	8.09109	5.91354e-16	7.68795e-15
ALPPL2	0.440664	-0.19132	0.510915	-0.374465	0.708058	NA
ALS2	1735.46	0.0641403	0.0841242	0.762448	0.445793	0.624518
ALS2CL	100.807	-2.93749	0.249589	-11.7693	5.61667e-32	1.45788e-30
ALS2CR11	1.35197	0.225601	0.688555	0.327644	0.743181	NA
ALS2CR12	7.58184	-0.210535	0.591271	-0.356071	0.721787	0.842794
ALX1	93.8649	0.253217	0.220068	1.15063	0.249886	0.414089
ALX3	4.17425	2.19624	0.70663	3.10805	0.00188328	0.00643356
ALX4	15.9431	4.26987	0.652884	6.54001	6.15144e-11	5.60548e-10
ALYREF	3023.87	-0.0645955	0.0829677	-0.778562	0.436237	0.615596
AMACR	24.7551	0.367644	0.394231	0.932561	0.351047	0.528815
AMBP	50.5719	-0.668381	0.383944	-1.74083	0.0817138	0.171515
AMBRA1	1210.27	-0.0149297	0.100396	-0.148707	0.881785	0.941343
AMD1	6229	-0.315471	0.0870505	-3.624	0.000290085	0.00116757
AMD1P1	0.459143	-0.224249	0.546401	-0.410411	0.681504	NA
AMD1P3	0.536795	0.14861	0.534181	0.278202	0.780857	NA
AMDHD1	12.9343	1.57941	0.553597	2.853	0.00433081	0.0135667
AMDHD2	460.921	0.0331606	0.145391	0.228079	0.819585	0.902788
AMELY	1.16317	0.762102	0.679656	1.1213	0.262158	NA
AMER1	1347.85	0.0822113	0.0991986	0.828754	0.407243	0.586729
AMER2	10.9583	2.43452	0.596905	4.07857	4.53127e-05	0.000211659
AMER3	3.84111	-0.63086	0.687889	-0.917096	0.359092	0.537782
AMFR	632.823	0.554653	0.107223	5.1729	2.30485e-07	1.48076e-06
AMH	845.849	0.499676	0.16398	3.04718	0.00230997	0.00773229
AMHR2	37.2184	1.80582	0.359026	5.02977	4.91064e-07	3.02671e-06
AMIGO1	122.1	-0.811363	0.209897	-3.86554	0.000110845	0.000484062
AMIGO2	832.725	-0.363417	0.119649	-3.03735	0.00238665	0.00795948
AMMECR1	849.689	-0.991224	0.104993	-9.44088	3.69666e-21	6.35061e-20
AMMECR1L	1619.59	0.171446	0.0891745	1.92259	0.0545313	0.122659
AMN	5.04736	1.06265	0.669218	1.58789	0.112311	0.22234
AMN1	67.0195	0.505874	0.275849	1.83388	0.0666721	0.145074
AMOT	1072.53	2.06991	0.111315	18.595	3.52784e-77	2.83834e-75
AMOTL1	6120.36	1.59311	0.0820119	19.4253	4.71673e-84	4.29983e-82
AMOTL2	2658.57	1.6833	0.0995874	16.9027	4.29487e-64	2.59621e-62
AMPD2	1238.17	0.376527	0.0999674	3.7665	0.000165551	0.000698799
AMPD3	181.858	-0.94365	0.166812	-5.65697	1.54069e-08	1.12144e-07
AMPH	490.532	0.55734	0.122751	4.54043	5.61408e-06	2.99206e-05
AMT	36.638	-1.00965	0.343615	-2.93833	0.00329991	0.0106108
AMY2B	26.257	-0.202509	0.390109	-0.519107	0.603686	0.761275
AMZ1	6.84426	-0.22404	0.598566	-0.374295	0.708185	0.834888
AMZ2	1231.08	-0.0490804	0.0982095	-0.499752	0.61725	0.771196
AMZ2P1	175.462	0.139758	0.167492	0.834415	0.404047	0.583352
ANAPC1	2415.27	-0.204332	0.0935593	-2.18399	0.0289632	0.0718377
ANAPC10	300.461	0.288767	0.14021	2.05953	0.0394437	0.0935133
ANAPC11	1069.04	0.0735984	0.11506	0.639651	0.5224	0.692988
ANAPC13	1123.53	0.522601	0.0937038	5.57716	2.44474e-08	1.73862e-07
ANAPC15	271.493	0.168659	0.164615	1.02457	0.305567	0.479142
ANAPC16	1455.35	-0.111112	0.100126	-1.10972	0.267119	0.434244
ANAPC1P1	2.18329	0.0545178	0.716161	0.0761251	0.93932	0.971328
ANAPC2	1280.39	-0.0422139	0.116573	-0.362125	0.717259	0.840153
ANAPC4	1391.23	-0.459929	0.0882073	-5.21418	1.84635e-07	1.19709e-06
ANAPC5	3550.12	-0.111593	0.074138	-1.50521	0.132269	0.253226
ANAPC7	2131.12	-0.157361	0.078242	-2.0112	0.044304	0.103197
ANG	5.4721	1.1925	0.669452	1.7813	0.0748631	0.159685
ANGEL1	1256.67	-0.199189	0.0907452	-2.19504	0.0281611	0.0701251
ANGEL2	1235.21	0.0121959	0.105455	0.115651	0.907929	0.95493
ANGPT1	42.4571	-2.21755	0.345625	-6.41607	1.39835e-10	1.23347e-09
ANGPT2	27.6048	3.96772	0.523669	7.57677	3.54255e-14	4.1135e-13
ANGPT4	38.542	-1.6459	0.348709	-4.71999	2.35861e-06	1.33076e-05
ANGPTL1	43.9835	1.52821	0.400278	3.81788	0.000134604	0.000577773
ANGPTL2	682.485	0.682202	0.107463	6.34827	2.17755e-10	1.89347e-09
ANGPTL3	2.06298	-0.00639735	0.71181	-0.00898743	0.992829	0.99662
ANGPTL4	35.1957	-2.30053	0.382973	-6.00704	1.88943e-09	1.4941e-08
ANGPTL5	0.585463	0.23253	0.577538	0.402622	0.687226	NA
ANGPTL6	2.74525	-0.071908	0.711026	-0.101133	0.919445	0.960611
ANGPTL7	0.713093	-0.0241106	0.599152	-0.0402412	0.967901	NA
ANGPTL8	2.36145	0.363559	0.716835	0.507172	0.612034	0.767181
ANK1	89.8173	-1.11595	0.239861	-4.6525	3.27941e-06	1.80738e-05
ANK2	1332.88	-0.892675	0.119847	-7.44843	9.44565e-14	1.06827e-12
ANK3	632.28	-0.492743	0.124509	-3.95749	7.57407e-05	0.000340224
ANKAR	33.6642	0.126685	0.364494	0.347563	0.728169	0.846267
ANKDD1A	103.841	-0.45158	0.219259	-2.05957	0.0394394	0.0935128
ANKDD1B	2.95234	-0.149711	0.703804	-0.212717	0.831547	0.909777
ANKEF1	340.3	-0.801062	0.140375	-5.70658	1.15267e-08	8.494e-08
ANKFN1	0.938881	-0.143841	0.636407	-0.22602	0.821186	NA
ANKFY1	2671	0.13354	0.0830215	1.60849	0.107727	0.214809
ANKH	106.327	0.185922	0.205026	0.906822	0.364501	0.543865
ANKHD1	58.2404	-0.331288	0.290668	-1.13975	0.254392	0.419649
ANKHD1-EIF4EBP3	15.8489	-0.042957	0.478658	-0.0897446	0.92849	0.965517
ANKIB1	1790.97	-0.454406	0.0971796	-4.67594	2.92613e-06	1.6282e-05
ANKK1	1.55149	0.402015	0.708788	0.567187	0.570587	0.733696
ANKLE1	74.4882	-0.256057	0.239606	-1.06866	0.285222	0.455968
ANKLE2	2780.85	0.00618886	0.0762537	0.0811616	0.935313	0.969002
ANKMY1	166.131	0.733658	0.184866	3.96859	7.22987e-05	0.000325863
ANKMY2	446.292	0.692839	0.151978	4.55882	5.14424e-06	2.75464e-05
ANKRA2	236.851	-0.118723	0.152364	-0.779205	0.435859	0.615176
ANKRD1	116.231	3.90009	0.300667	12.9715	1.77624e-38	5.70415e-37
ANKRD10	2871.5	0.203788	0.0761512	2.6761	0.00744845	0.0220181
ANKRD10-IT1	219.81	0.324501	0.162105	2.0018	0.0453065	0.105131
ANKRD11	4386.6	0.14757	0.0799761	1.84518	0.0650111	0.142007
ANKRD12	645.075	0.231407	0.115138	2.00982	0.0444499	0.103494
ANKRD13A	516.548	0.160455	0.112788	1.42263	0.154845	0.28697
ANKRD13B	537.974	-0.73962	0.11481	-6.44211	1.17824e-10	1.04749e-09
ANKRD13C	762.444	0.0959438	0.113751	0.843452	0.398976	0.578512
ANKRD13D	588.998	0.311639	0.118486	2.63018	0.00853391	0.0248307
ANKRD16	238.36	-0.087787	0.154318	-0.56887	0.569444	0.732893
ANKRD17	4866.27	0.093895	0.0886443	1.05923	0.289493	0.461328
ANKRD18A	186.487	0.447338	0.162994	2.74451	0.00606013	0.0183386
ANKRD18B	280.565	0.202729	0.171785	1.18014	0.237946	0.399161
ANKRD18CP	143.349	-4.15685	0.262064	-15.8619	1.16261e-56	5.98733e-55
ANKRD18DP	0.974403	0.967904	0.63995	1.51247	0.130415	NA
ANKRD18EP	92.7936	-0.152558	0.226183	-0.67449	0.5	0.674067
ANKRD19P	4.95245	-0.480057	0.662983	-0.724087	0.469013	0.646118
ANKRD20A18P	1.37535	0.533273	0.699209	0.76268	0.445654	0.624363
ANKRD20A19P	0.34766	-0.272253	0.482258	-0.564539	0.572387	NA
ANKRD20A4	1.00691	0.27232	0.667008	0.408271	0.683075	NA
ANKRD20A5P	5.36896	-0.246367	0.660533	-0.372982	0.709162	0.835387
ANKRD20A7P	0.386761	0.248891	0.493536	0.504303	0.614049	NA
ANKRD23	6.86801	0.745438	0.607686	1.22668	0.219942	0.37596
ANKRD24	138.923	-2.46068	0.212883	-11.5589	6.65779e-31	1.6577e-29
ANKRD26	804.107	0.380911	0.131777	2.89058	0.00384532	0.0121809
ANKRD26P1	1.90464	0.883069	0.712529	1.23934	0.215218	0.370096
ANKRD26P4	0.195881	0.165172	0.449234	0.367675	0.713115	NA
ANKRD27	1037.38	-0.570845	0.105175	-5.42758	5.71217e-08	3.91098e-07
ANKRD28	1406.82	-0.517468	0.0899412	-5.7534	8.74652e-09	6.52396e-08
ANKRD29	12.2195	-0.819933	0.518245	-1.58213	0.113619	0.224399
ANKRD30B	4.84564	-0.77563	0.664156	-1.16784	0.24287	0.405375
ANKRD31	14.0709	0.0828758	0.482912	0.171617	0.863739	0.930941
ANKRD33	5.67977	-0.75156	0.65355	-1.14997	0.250158	0.41448
ANKRD33B	340.353	-2.12957	0.142009	-14.996	7.79491e-51	3.45544e-49
ANKRD34A	8.62251	1.21796	0.600393	2.0286	0.0424991	0.0996597
ANKRD34B	1.90746	-0.296245	0.706083	-0.419562	0.674805	0.812083
ANKRD35	141.783	-0.683357	0.195959	-3.48724	0.000488026	0.00188346
ANKRD36	140.8	0.814443	0.200934	4.05328	5.05036e-05	0.000234116
ANKRD36B	119.67	0.823704	0.217642	3.78468	0.000153905	0.000653425
ANKRD36BP2	19.4458	0.148631	0.438495	0.338957	0.734642	0.850423
ANKRD36C	89.6555	0.759842	0.245159	3.09939	0.00193919	0.00660557
ANKRD37	15.2894	0.272476	0.541609	0.503086	0.614904	0.769718
ANKRD39	107.43	-0.402365	0.212274	-1.89549	0.058027	0.129325
ANKRD40	1980.29	0.0772973	0.0873379	0.885037	0.376137	0.555036
ANKRD42	231.197	0.580411	0.156267	3.71422	0.000203829	0.000844295
ANKRD44	4.96537	1.05785	0.664417	1.59214	0.111353	0.220695
ANKRD45	125.502	0.694797	0.193882	3.58361	0.000338872	0.00134881
ANKRD46	990.279	0.684899	0.135011	5.07291	3.91779e-07	2.44525e-06
ANKRD49	297.231	0.262559	0.143461	1.83017	0.0672241	0.146163
ANKRD50	1334.18	0.12702	0.104541	1.21503	0.224354	0.381286
ANKRD52	3098.21	0.365788	0.0856516	4.27065	1.94905e-05	9.64628e-05
ANKRD53	19.3416	2.57329	0.493248	5.21704	1.81807e-07	1.17961e-06
ANKRD54	395.061	0.558213	0.131574	4.24258	2.20966e-05	0.000108553
ANKRD55	0.783522	0.612618	0.555021	1.10377	0.269691	NA
ANKRD6	232.127	-0.948575	0.165259	-5.73994	9.47115e-09	7.03891e-08
ANKRD61	26.668	0.840911	0.385297	2.1825	0.0290726	0.0720536
ANKRD62	0.745849	-0.333436	0.607023	-0.549297	0.582802	NA
ANKRD63	0.674542	0.312043	0.615227	0.5072	0.612015	NA
ANKRD65	17.0838	2.14273	0.508849	4.21094	2.54313e-05	0.000123619
ANKRD66	3.28589	1.99615	0.714869	2.79233	0.00523302	0.0161051
ANKRD9	791.912	-0.128603	0.12479	-1.03056	0.302748	0.475876
ANKS1A	1464.38	0.0418239	0.0846287	0.494204	0.621162	0.774097
ANKS1B	46.4311	-0.0587125	0.299894	-0.195778	0.844784	0.917962
ANKS3	479.902	0.0127086	0.136582	0.0930471	0.925866	0.964163
ANKS4B	49.0027	-0.630998	0.317669	-1.98634	0.046996	0.108385
ANKS6	1688.9	-0.396857	0.0894648	-4.4359	9.16871e-06	4.74122e-05
ANKUB1	0.540719	0.210795	0.569458	0.370168	0.711257	NA
ANKZF1	1079.75	-0.602718	0.0906444	-6.64926	2.94563e-11	2.74618e-10
ANLN	4368.89	0.167097	0.0798148	2.09356	0.0362993	0.0872109
ANO1	117.78	-1.18832	0.639745	-1.85748	0.0632423	0.138841
ANO10	1028.42	-0.231115	0.0925752	-2.49652	0.012542	0.0348213
ANO2	85.1662	-0.467088	0.251025	-1.86073	0.0627827	0.137939
ANO3	10.6714	1.46725	0.5744	2.5544	0.0106371	0.0300907
ANO4	85.6602	0.039485	0.307976	0.128208	0.897984	0.948889
ANO5	195.736	-1.26324	0.18507	-6.82572	8.74861e-12	8.51069e-11
ANO6	3149.98	-0.394795	0.0837867	-4.71191	2.45411e-06	1.38051e-05
ANO7	60.5195	-0.138437	0.278534	-0.497022	0.619174	0.772393
ANO7P1	0.863154	0.123727	0.597345	0.207128	0.83591	NA
ANO8	958.381	-0.978064	0.144906	-6.74965	1.48199e-11	1.41311e-10
ANO9	121.378	-2.30468	0.221788	-10.3914	2.714e-25	5.54774e-24
ANOS1	1851.72	-1.81261	0.495581	-3.65754	0.000254644	0.00103469
ANOS2P	138.131	-2.14932	0.206666	-10.4	2.48011e-25	5.08343e-24
ANP32A	12609.9	0.380551	0.0731678	5.20107	1.98146e-07	1.28028e-06
ANP32AP1	1.04227	-0.298474	0.649304	-0.459683	0.645743	NA
ANP32B	6203.44	0.683735	0.0804291	8.50109	1.87822e-17	2.63743e-16
ANP32E	11390.8	-0.0666782	0.107866	-0.61816	0.53647	0.704685
ANPEP	64.9314	-0.961742	0.288227	-3.33676	0.00084762	0.00312254
ANTXR1	2812.03	0.360384	0.0809483	4.45203	8.50623e-06	4.42293e-05
ANTXR2	981.385	2.09291	0.128435	16.2955	1.06249e-59	5.83029e-58
ANXA1	515.161	3.00397	0.137842	21.7929	2.7114e-105	3.48291e-103
ANXA11	754.762	-1.0364	0.105442	-9.82909	8.43807e-23	1.56239e-21
ANXA13	0.346953	0.20087	0.449737	0.446639	0.655136	NA
ANXA2	5390.95	1.0261	0.0957184	10.72	8.19754e-27	1.7718e-25
ANXA2P1	0.372179	0.0473982	0.491186	0.0964973	0.923126	NA
ANXA2P2	0.720389	0.651316	0.578978	1.12494	0.260614	NA
ANXA2R	0.271417	0.179517	0.450331	0.398633	0.690163	NA
ANXA3	356.715	-0.68619	0.167406	-4.09896	4.15014e-05	0.000195187
ANXA4	200.571	0.644921	0.160344	4.02211	5.7679e-05	0.000264558
ANXA5	9994.28	-0.544674	0.0779948	-6.98347	2.87972e-12	2.90775e-11
ANXA6	4509.87	0.306403	0.0845506	3.6239	0.000290193	0.0011678
ANXA7	1480.58	-0.509609	0.0839907	-6.06745	1.29955e-09	1.04445e-08
ANXA8	0.542438	-0.481719	0.540076	-0.891947	0.372421	NA
ANXA8L1	1.08855	-1.0744	0.655026	-1.64024	0.100956	NA
ANXA9	120.788	-1.29761	0.208672	-6.21842	5.02182e-10	4.17715e-09
AOAH	1.559	0.0680155	0.711102	0.095648	0.9238	0.962732
AOC1	6.40472	-1.18412	0.631392	-1.87541	0.0607369	0.134227
AOC2	70.6156	0.586273	0.247199	2.37167	0.0177081	0.047055
AOC3	62.5625	1.48342	0.291143	5.09515	3.48471e-07	2.19144e-06
AOC4P	1.19074	0.0940642	0.690118	0.136302	0.891583	NA
AOX1	171.399	0.0103202	0.173318	0.0595448	0.952518	0.977409
AOX3P	0.484701	0.450403	0.555542	0.810745	0.417512	NA
AP000221.1	35.4292	1.2314	0.356902	3.45026	0.000560049	0.00213662
AP000223.42	3.32589	0.617861	0.701226	0.881115	0.378255	0.557325
AP000230.1	2.48859	0.663824	0.715033	0.928382	0.35321	0.531224
AP000240.9	3.16789	-0.794094	0.706301	-1.1243	0.260886	0.427147
AP000251.3	37.7254	-0.409935	0.324093	-1.26487	0.205918	0.357557
AP000253.1	2.26661	0.123462	0.716862	0.172225	0.86326	0.93066
AP000254.8	17.06	0.436056	0.446923	0.975684	0.329221	0.505324
AP000255.6	11.5952	-0.905772	0.515024	-1.7587	0.0786286	0.166285
AP000265.1	1.12296	-0.280624	0.68822	-0.407753	0.683455	NA
AP000266.7	0.521137	-0.178311	0.561988	-0.317286	0.751027	NA
AP000280.66	0.386761	0.248891	0.493536	0.504303	0.614049	NA
AP000282.3	0.311225	0.195823	0.467838	0.41857	0.67553	NA
AP000318.2	2.09166	1.01275	0.716482	1.4135	0.157508	0.290664
AP000320.7	0.349775	-0.0176811	0.482868	-0.0366169	0.97079	NA
AP000343.2	0.274238	-0.0308478	0.450934	-0.0684086	0.94546	NA
AP000344.3	3.24778	1.03228	0.707924	1.45818	0.144792	0.27195
AP000344.4	1.51506	1.00743	0.70122	1.43667	0.150811	0.281128
AP000345.1	1.10096	0.705428	0.673394	1.04757	0.294836	NA
AP000347.2	30.8499	-0.308865	0.36658	-0.842558	0.399476	0.578868
AP000347.4	4.83421	0.0619382	0.654875	0.0945801	0.924648	0.963428
AP000351.3	0.389582	-0.019106	0.495944	-0.0385246	0.969269	NA
AP000357.4	0.732279	-0.666634	0.582409	-1.14462	0.252369	NA
AP000432.1	27.9165	1.41366	0.394494	3.58348	0.000339046	0.00134926
AP000436.4	1.02328	-0.0448791	0.667442	-0.0672404	0.94639	NA
AP000437.3	1.82573	0.312493	0.714169	0.437561	0.661704	0.802694
AP000438.2	1.58526	0.0943162	0.712358	0.1324	0.894668	0.946896
AP000439.3	0.651099	-0.0896811	0.589274	-0.152189	0.879038	NA
AP000442.1	6.85651	-0.457948	0.613857	-0.746018	0.455657	0.633906
AP000442.4	0.526073	-0.155747	0.533295	-0.292046	0.770251	NA
AP000473.5	0.484701	0.450403	0.555542	0.810745	0.417512	NA
AP000473.8	0.346953	0.20087	0.449737	0.446639	0.655136	NA
AP000476.1	0.46408	-0.226159	0.547424	-0.413134	0.679509	NA
AP000487.5	23.4579	0.0668257	0.396313	0.168618	0.866097	0.932443
AP000487.6	4.23294	0.251963	0.691298	0.364478	0.715501	0.838965
AP000560.3	2.28276	-0.103361	0.715009	-0.144559	0.885059	0.942685
AP000569.9	6.29039	0.0731775	0.612546	0.119465	0.904907	0.953468
AP000577.2	1.21707	0.153976	0.664235	0.23181	0.816685	NA
AP000580.1	1.28868	0.188537	0.698355	0.269973	0.787181	NA
AP000593.7	1.75984	0.541024	0.713866	0.757879	0.448523	0.626918
AP000619.5	0.386761	0.248891	0.493536	0.504303	0.614049	NA
AP000640.10	1.49272	0.999937	0.698906	1.43072	0.152511	0.283573
AP000640.2	0.811033	0.0816289	0.639568	0.127631	0.898441	NA
AP000648.5	125.067	0.0152074	0.197774	0.0768925	0.938709	0.971052
AP000662.4	288.515	0.848509	0.145679	5.8245	5.72844e-09	4.33864e-08
AP000679.2	0.559198	0.211661	0.573198	0.369263	0.711932	NA
AP000687.1	0.952706	0.252937	0.65924	0.38368	0.701215	NA
AP000688.11	1.18649	-0.929668	0.679079	-1.36901	0.170995	NA
AP000688.14	0.565881	-0.162049	0.541025	-0.299522	0.764542	NA
AP000688.29	120.155	-1.36886	0.218047	-6.27784	3.43314e-10	2.90916e-09
AP000692.10	1.87522	0.349054	0.716634	0.487074	0.626206	0.77753
AP000692.9	3.42275	0.659901	0.701189	0.941117	0.346645	0.52407
AP000704.5	8.1517	0.463674	0.597724	0.775732	0.437907	0.617132
AP000708.1	2.87949	-1.44334	0.714435	-2.02025	0.0433575	0.101399
AP000770.1	2.23934	-1.59262	0.715246	-2.22667	0.0259692	0.0654527
AP000859.4	0.4456	-0.221493	0.54357	-0.407478	0.683657	NA
AP000866.1	10.2258	0.238149	0.53744	0.443118	0.65768	0.799763
AP000892.6	127.475	3.44153	0.263286	13.0714	4.79435e-39	1.58235e-37
AP000936.1	2.06727	-0.846575	0.715729	-1.18282	0.236882	0.397936
AP000936.4	0.560238	0.465712	0.541146	0.860604	0.389456	NA
AP000962.1	0.274238	-0.0308478	0.450934	-0.0684086	0.94546	NA
AP000997.3	0.386761	0.248891	0.493536	0.504303	0.614049	NA
AP001046.5	8.9097	-0.13394	0.590505	-0.226823	0.820562	0.903353
AP001052.1	0.658885	-0.051992	0.613792	-0.0847061	0.932495	NA
AP001055.6	0.409165	0.318765	0.505027	0.631183	0.527921	NA
AP001059.5	0.346953	0.20087	0.449737	0.446639	0.655136	NA
AP001062.7	49.1136	0.312036	0.288581	1.08128	0.279574	0.449258
AP001062.9	0.56202	-0.132737	0.572118	-0.232009	0.816531	NA
AP001065.15	50.7014	-0.259332	0.289127	-0.896951	0.369745	0.548696
AP001092.4	6.33581	-1.80091	0.641533	-2.80719	0.00499751	0.0154434
AP001172.2	0.271417	0.179517	0.450331	0.398633	0.690163	NA
AP001189.4	1.5058	-0.000213486	0.694979	-0.000307184	0.999755	0.999792
AP001258.4	26.447	-2.82465	0.444119	-6.36012	2.01591e-10	1.75764e-09
AP001271.3	0.537501	-0.548207	0.568481	-0.964336	0.334878	NA
AP001347.6	50.0446	0.576798	0.292937	1.96901	0.0489514	0.11212
AP001350.4	5.72361	0.687276	0.650586	1.05639	0.290788	0.462708
AP001372.2	85.2716	0.249277	0.249134	1.00057	0.317034	0.491123
AP001412.1	6.46519	-0.517303	0.614439	-0.841911	0.399838	0.579086
AP001429.1	0.854059	0.87612	0.62744	1.39634	0.162612	NA
AP001432.14	4.58581	0.445888	0.66869	0.666809	0.504894	0.678296
AP001437.1	3.35899	-0.677674	0.704331	-0.962152	0.335973	0.512599
AP001462.6	6.18804	-0.312937	0.622105	-0.50303	0.614944	0.769718
AP001469.5	15.5527	0.390649	0.479934	0.813963	0.415666	0.594733
AP001469.7	5.99471	-0.264615	0.638133	-0.414671	0.678383	0.814535
AP001469.9	43.6357	-0.0939676	0.308786	-0.304313	0.76089	0.86781
AP001471.1	0.653948	-0.041873	0.590135	-0.0709549	0.943434	NA
AP001476.2	1.22718	-0.465684	0.68035	-0.684476	0.493675	NA
AP001505.10	109.601	0.08095	0.234164	0.345697	0.72957	0.846982
AP001596.6	9.99653	1.29567	0.55833	2.32061	0.0203079	0.0529428
AP001619.2	6.83678	-0.0341318	0.619926	-0.0550578	0.956092	0.979094
AP001619.3	1.12226	0.367843	0.687804	0.534807	0.592783	NA
AP001626.2	22.7106	-1.0112	0.434273	-2.3285	0.0198854	0.0520034
AP001627.1	1.23831	-0.197948	0.692203	-0.285968	0.774903	NA
AP001628.6	10.7624	-0.671955	0.543145	-1.23716	0.216029	0.371096
AP001628.7	0.342724	-0.22978	0.449022	-0.511735	0.608837	NA
AP002856.5	65.0935	-1.5498	0.277123	-5.59244	2.23899e-08	1.59934e-07
AP002954.3	11.4608	0.227639	0.540316	0.421307	0.673531	0.81151
AP002954.4	0.532565	-0.473523	0.537817	-0.880454	0.378614	NA
AP003025.2	0.890494	0.194276	0.654161	0.296985	0.766478	NA
AP003068.18	11.1176	0.298096	0.524665	0.568164	0.569924	0.733343
AP003068.23	42.9698	-0.378949	0.333856	-1.13507	0.256346	0.422064
AP003774.1	1.30998	-0.129178	0.705616	-0.183071	0.854742	NA
AP003774.4	1.69408	-0.972157	0.712235	-1.36494	0.172272	0.312226
AP003774.6	24.0171	-1.04794	0.40334	-2.59816	0.00937241	0.0270063
AP004290.1	0.386761	0.248891	0.493536	0.504303	0.614049	NA
AP004372.1	2.28313	0.338089	0.716862	0.471624	0.637195	0.785781
AP004782.1	29.2516	-0.126989	0.367028	-0.345992	0.729349	0.846899
AP005530.1	0.386761	0.248891	0.493536	0.504303	0.614049	NA
AP006216.10	1.00974	-0.0369917	0.666581	-0.0554946	0.955744	NA
AP006222.2	18.5359	0.476677	0.488888	0.975024	0.329549	0.505663
AP006285.2	0.507105	0.43737	0.532961	0.820642	0.41185	NA
AP006547.3	0.34766	-0.272253	0.482258	-0.564539	0.572387	NA
AP006621.5	40.6346	0.475983	0.333585	1.42687	0.153617	0.285114
AP006621.6	9.47269	0.0645201	0.568464	0.113499	0.909635	0.955645
AP006621.8	0.409165	0.318765	0.505027	0.631183	0.527921	NA
AP1AR	1267.56	-0.035512	0.0962914	-0.368797	0.712279	0.83739
AP1B1	2520.33	0.0182257	0.0882805	0.206452	0.836438	0.913006
[truncated: 26,738 more rows]

## Sheet: all significant DE genes
GENE_NAME	baseMean	log2FoldChange	lfcSE	stat	pvalue	padj
A2M	18.9595	1.10755	0.464173	2.38607	0.0170297	0.0455253
A2ML1	25.1755	-3.77407	0.502363	-7.51264	5.7948e-14	6.64345e-13
A4GALT	99.7563	1.28328	0.299364	4.2867	1.81351e-05	9.01887e-05
AAAS	2003.94	0.276301	0.0914995	3.0197	0.00253024	0.00838148
AACS	936.113	0.556552	0.0935874	5.94687	2.73326e-09	2.12641e-08
AADAT	761.141	0.643216	0.103146	6.236	4.48911e-10	3.76028e-09
AAGAB	2456.44	0.308752	0.0916326	3.36945	0.000753175	0.00280339
AAMP	2960.68	-0.236802	0.0894348	-2.64777	0.00810252	0.0237251
AARS	5821.96	-0.291061	0.0749588	-3.88295	0.000103196	0.000452465
ABALON	25.5909	1.06289	0.390765	2.72002	0.00652782	0.019611
ABCA1	915.505	-3.18733	0.168695	-18.894	1.27769e-79	1.06985e-77
ABCA2	481.034	0.431268	0.126681	3.40436	0.000663202	0.00249978
ABCA5	53.9187	1.09025	0.288368	3.78075	0.000156358	0.000663343
ABCA7	301.355	-0.591922	0.145873	-4.05778	4.95412e-05	0.000229938
ABCA9	16.365	3.40217	0.571676	5.95121	2.6617e-09	2.07502e-08
ABCB1	79.1691	2.8176	0.293822	9.58949	8.85255e-22	1.56236e-20
ABCB10	657.964	0.83252	0.123175	6.75882	1.39121e-11	1.32879e-10
ABCB4	119.933	2.68844	0.246978	10.8853	1.35383e-27	3.00957e-26
ABCB7	1015.43	-0.24386	0.0942794	-2.58656	0.0096938	0.0278083
ABCC3	13.7676	-1.68081	0.511091	-3.28866	0.00100664	0.00366063
ABCC4	550.134	0.550823	0.158008	3.48605	0.000490211	0.00189124
ABCC6	24.8886	1.15691	0.404858	2.85756	0.00426917	0.0133996
ABCC9	112.893	-0.674975	0.213272	-3.16485	0.00155164	0.00540932
ABCD1	209.055	-0.688173	0.211569	-3.25271	0.0011431	0.00410537
ABCD2	9.39759	3.03108	0.645844	4.69321	2.68952e-06	1.50432e-05
ABCG1	323.793	1.37396	0.421469	3.25993	0.0011144	0.00401314
ABCG2	77.9536	3.59016	0.334241	10.7412	6.51815e-27	1.41694e-25
ABHD10	990.094	0.401516	0.113974	3.52287	0.000426895	0.00166343
ABHD11	371.729	-0.407129	0.133494	-3.04979	0.00229004	0.0076701
ABHD12B	31.0932	-2.28665	0.394374	-5.79817	6.70405e-09	5.04544e-08
ABHD14A	47.6358	1.50103	0.323467	4.64045	3.47657e-06	1.91004e-05
ABHD17C	588.802	-0.401636	0.122791	-3.27089	0.00107209	0.0038737
ABHD18	366.317	-0.329678	0.137062	-2.40533	0.016158	0.0434948
ABHD3	266.702	1.04435	0.183846	5.68059	1.34229e-08	9.8272e-08
ABHD4	1355	-1.09838	0.121534	-9.03763	1.60101e-19	2.54899e-18
ABHD5	349.395	-0.410285	0.137569	-2.9824	0.00285997	0.00934908
ABHD6	186.156	0.69674	0.200196	3.48029	0.000500866	0.00192873
ABHD8	184.479	-0.783013	0.192239	-4.07312	4.63876e-05	0.000216456
ABI2	4988.96	0.198239	0.0840048	2.35986	0.0182819	0.0483695
ABL2	1392.96	0.532696	0.0985511	5.40528	6.47082e-08	4.41038e-07
ABLIM1	4257.27	1.06381	0.108385	9.81512	9.69236e-23	1.78878e-21
ABLIM2	22.4358	-1.38532	0.427862	-3.23778	0.00120465	0.00430111
ABR	1789.35	0.270439	0.0913311	2.96109	0.00306553	0.00993059
ABRACL	1622.54	-0.875157	0.108378	-8.07503	6.74628e-16	8.75545e-15
ABT1	1021.71	0.261921	0.0940644	2.78448	0.00536136	0.0164575
ABTB2	443.386	-1.32262	0.437232	-3.02499	0.00248645	0.00825215
AC002454.1	9.70326	1.56611	0.575335	2.72208	0.00648725	0.0195084
AC002480.3	15.1168	1.37096	0.490796	2.79334	0.00521674	0.0160594
AC004540.4	15.2479	1.24146	0.479199	2.59069	0.00957838	0.0275196
AC004951.6	35.5563	0.999221	0.367045	2.72234	0.00648208	0.0194954
AC005152.3	13.2274	2.47888	0.588805	4.21001	2.55355e-05	0.000124055
AC005154.6	201.641	0.451899	0.160634	2.81322	0.00490488	0.0151862
AC005276.1	39.5125	-1.82371	0.356559	-5.11476	3.14134e-07	1.98767e-06
AC005301.9	19.6329	-2.05768	0.462085	-4.45302	8.46698e-06	4.40454e-05
AC005307.1	17.8563	-2.02402	0.472751	-4.28136	1.85754e-05	9.22364e-05
AC005329.7	10.5007	1.65294	0.596202	2.77245	0.00556356	0.0170158
AC005355.1	5.73732	-2.585	0.683795	-3.78037	0.000156595	0.00066412
AC005682.5	62.8635	-2.19546	0.305379	-7.1893	6.51229e-13	6.9448e-12
AC005863.1	2.74168	-1.96011	0.713495	-2.74719	0.00601076	0.0182062
AC007191.4	136.427	-0.751155	0.193011	-3.89177	9.95152e-05	0.000437627
AC007250.4	7.24539	-2.8837	0.661475	-4.3595	1.3036e-05	6.62883e-05
AC007277.3	96.6757	6.68569	0.558675	11.967	5.28826e-33	1.4132e-31
AC007383.3	36.5304	-1.95995	0.357189	-5.48714	4.08484e-08	2.84592e-07
AC007405.4	25.0672	3.5493	0.506968	7.00103	2.54089e-12	2.57367e-11
AC007405.6	123.014	2.46279	0.241722	10.1885	2.23187e-24	4.39531e-23
AC007405.8	32.7166	5.3016	0.606737	8.7379	2.37492e-18	3.52542e-17
AC007461.2	3.12149	2.14115	0.716813	2.98704	0.00281693	0.00922572
AC007463.2	4.30495	-2.71101	0.711554	-3.80999	0.000138974	0.000595064
AC007682.1	17.9273	4.22059	0.615142	6.86116	6.83038e-12	6.6936e-11
AC007743.1	93.5598	1.12001	0.25233	4.43866	9.05211e-06	4.68522e-05
AC008088.4	35.8085	-1.37169	0.386834	-3.54593	0.000391227	0.00153877
AC009014.3	12.8353	1.66752	0.706835	2.35914	0.0183176	0.0484355
AC009133.17	84.1403	-2.33906	0.253035	-9.24404	2.3737e-20	3.94013e-19
AC009166.5	15.2828	2.28037	0.529732	4.30477	1.6716e-05	8.35724e-05
AC009166.7	15.2431	3.2971	0.582439	5.66086	1.50619e-08	1.09774e-07
AC009299.3	8.5342	-2.44317	0.620029	-3.94041	8.13417e-05	0.000363433
AC009336.19	46.5395	5.6392	0.601203	9.37986	6.6058e-21	1.12715e-19
AC009948.5	256.046	1.04954	0.172724	6.07643	1.2289e-09	9.90478e-09
AC010642.1	26.0156	0.953108	0.395539	2.40964	0.0159681	0.0430436
AC010761.8	107.805	-0.75746	0.235669	-3.21409	0.0013086	0.00463641
AC010980.2	14.3964	3.92771	0.6302	6.23249	4.59082e-10	3.83978e-09
AC011738.4	6.16759	-2.11964	0.657553	-3.22352	0.00126625	0.00450044
AC012146.7	139.685	-0.620139	0.201129	-3.0833	0.00204722	0.00692668
AC012512.1	121.618	-1.76065	0.21336	-8.25202	1.55741e-16	2.08713e-15
AC012531.25	47.0531	5.67203	0.598888	9.47094	2.77333e-21	4.81563e-20
AC013461.1	787.989	-0.550345	0.131259	-4.19281	2.75518e-05	0.000133324
AC016723.4	2.88722	-2.14335	0.716478	-2.99152	0.00277597	0.00909948
AC027612.4	56.4472	-2.57332	0.350626	-7.3392	2.14872e-13	2.35931e-12
AC069154.4	1.97371	-1.70776	0.706327	-2.41781	0.0156144	0.0422412
AC073071.1	40.2141	0.93132	0.338744	2.74933	0.00597171	0.0181118
AC074117.10	449.037	-0.484253	0.138032	-3.50828	0.000451017	0.00174959
AC074289.1	294.701	-3.52131	0.183549	-19.1845	4.98482e-82	4.36809e-80
AC074363.1	13.8857	-1.9707	0.520554	-3.78577	0.000153233	0.000650937
AC078941.1	4.38864	-1.86702	0.692648	-2.69548	0.00702883	0.0209227
AC079922.3	23.0134	0.955636	0.406064	2.35341	0.0186021	0.0490846
AC087073.1	4.99309	2.60853	0.713274	3.65712	0.000255063	0.0010362
AC091493.2	33.7082	-1.7769	0.416113	-4.27024	1.95266e-05	9.65778e-05
AC092066.1	94.3345	0.94733	0.255305	3.71059	0.00020678	0.000855579
AC092198.1	46.5742	1.63209	0.342292	4.76812	1.85957e-06	1.06514e-05
AC092669.3	273.693	-0.717569	0.15059	-4.76504	1.88815e-06	1.08042e-05
AC093620.5	4.15277	2.19648	0.706827	3.10753	0.00188661	0.00644297
AC093627.7	5.20859	-2.97214	0.704912	-4.21633	2.48313e-05	0.000121066
AC093642.5	11.9302	-1.4423	0.526011	-2.74195	0.00610754	0.0184672
AC093673.5	210.861	-1.20433	0.178478	-6.74779	1.50114e-11	1.43016e-10
AC093818.1	40.5903	-1.60849	0.327098	-4.91747	8.76703e-07	5.2283e-06
AC093838.4	660.49	0.333595	0.126388	2.63946	0.00830371	0.0242389
AC098614.2	15.2035	-1.41348	0.497128	-2.8433	0.00446493	0.0139559
AC100830.5	5.85046	-1.68129	0.655544	-2.56473	0.0103258	0.0293567
AC104304.4	12.5943	-4.21485	0.656267	-6.42246	1.34086e-10	1.18554e-09
AC106875.1	12.9729	-2.03267	0.551516	-3.68561	0.000228152	0.000936467
AC108142.1	203.276	-1.61502	0.174255	-9.26812	1.89462e-20	3.16583e-19
AC109642.1	18.0806	-3.30312	0.538952	-6.12877	8.85586e-10	7.22791e-09
AC114877.3	9.3967	-1.48078	0.590256	-2.5087	0.0121177	0.0338009
AC116614.1	80.3761	-3.49057	0.311749	-11.1967	4.23065e-29	9.94248e-28
AC141586.5	194.458	0.438998	0.167038	2.62814	0.00858537	0.0249644
AC141928.1	629.686	6.22521	0.234803	26.5125	6.95678e-155	1.82882e-152
AC144450.1	9.7164	-1.94921	0.621185	-3.13788	0.00170173	0.00587729
AC144450.2	14.674	-1.88815	0.519225	-3.63648	0.000276393	0.0011161
AC145124.2	100.837	0.822837	0.236149	3.4844	0.000493237	0.00190195
AC156455.1	32.2917	-1.07641	0.360889	-2.98266	0.00285759	0.00934263
AC159540.1	136.878	1.01347	0.201231	5.03633	4.74553e-07	2.93454e-06
AC226118.1	17.2791	-1.64907	0.490021	-3.36531	0.000764578	0.00284209
ACAA2	2207.07	-0.71389	0.0783202	-9.11502	7.86579e-20	1.27294e-18
ACAD8	1648.12	-1.07595	0.0897852	-11.9836	4.32935e-33	1.15969e-31
ACADM	1749.27	-0.247552	0.0947935	-2.61149	0.00901483	0.0260857
ACADS	79.8428	-0.651417	0.250822	-2.59713	0.00940058	0.0270771
ACADVL	3797.24	-0.515198	0.0895348	-5.75416	8.70711e-09	6.49671e-08
ACAN	38.4998	2.23647	0.38835	5.7589	8.46631e-09	6.3233e-08
ACAP1	139.684	-1.87643	0.200382	-9.36429	7.65651e-21	1.30149e-19
ACAP3	1814.19	0.522563	0.117745	4.4381	9.0756e-06	4.69522e-05
ACAT2	6651.18	0.215735	0.0878881	2.45465	0.0141021	0.0386543
ACBD4	104.26	-1.43763	0.240319	-5.98218	2.20167e-09	1.72831e-08
ACBD6	1840.2	-0.251233	0.0865055	-2.90425	0.00368136	0.011719
ACD	679.925	-0.3524	0.135691	-2.59707	0.00940229	0.0270786
ACE	21.5724	-1.1537	0.43341	-2.66191	0.00776986	0.0228606
ACER3	570.759	-0.304933	0.11933	-2.55537	0.0106075	0.0300255
ACHE	45.1651	0.775439	0.302827	2.56067	0.0104471	0.0296584
ACKR3	136.637	1.63869	0.206049	7.9529	1.82195e-15	2.30115e-14
ACO1	2138.59	-1.13948	0.0863616	-13.1943	9.46102e-40	3.15945e-38
ACOT12	73.9565	4.79476	0.409265	11.7155	1.06133e-31	2.73286e-30
ACOT13	452.114	-0.441751	0.127773	-3.45732	0.000545581	0.00208529
ACOT7	2333.13	-0.623751	0.0800778	-7.78931	6.7375e-15	8.21139e-14
ACOX1	427.561	-0.5372	0.1204	-4.46178	8.12798e-06	4.23697e-05
ACOX2	100.12	0.987122	0.260507	3.78924	0.00015111	0.000642404
ACOXL	69.8593	-3.26138	0.326562	-9.98702	1.73721e-23	3.30041e-22
ACP2	1086.04	0.298654	0.117101	2.5504	0.0107599	0.0304037
ACP6	865.865	-0.341851	0.106703	-3.20377	0.00135639	0.00479145
ACPP	20.0774	1.47573	0.496789	2.97054	0.00297275	0.00967158
ACSBG1	49.2347	-1.52952	0.318775	-4.79813	1.60152e-06	9.27199e-06
ACSL3	4269.55	-0.647459	0.0917659	-7.05555	1.71918e-12	1.76669e-11
ACSL6	29.9503	1.07747	0.377202	2.85648	0.00428365	0.0134432
ACSS2	757.166	0.980785	0.159547	6.14731	7.88064e-10	6.45761e-09
ACSS3	833.37	0.737336	0.310515	2.37456	0.0175699	0.046755
ACTA1	131.102	4.35911	0.3109	14.0209	1.16104e-44	4.44896e-43
ACTA2	559.984	4.96283	0.180369	27.5149	1.16361e-166	3.60368e-164
ACTC1	899.279	1.55049	0.15132	10.2464	1.22789e-24	2.4523e-23
ACTG1	72850.5	0.721687	0.0669488	10.7797	4.2934e-27	9.37828e-26
ACTG2	397.099	1.01532	0.189702	5.35219	8.68974e-08	5.84e-07
ACTL6A	3424.06	0.250579	0.0795484	3.15002	0.00163261	0.00566763
ACTL6B	11.3166	-2.61881	0.57858	-4.52626	6.00357e-06	3.18463e-05
ACTL8	206.705	-1.87986	0.180909	-10.3912	2.71954e-25	5.55406e-24
ACTN2	47.1695	-1.36233	0.318617	-4.27576	1.90487e-05	9.44415e-05
ACTN3	388.287	-1.59836	0.179876	-8.8859	6.34055e-19	9.7515e-18
ACTN4	7751.73	0.230816	0.0825533	2.79596	0.00517458	0.0159513
ACTR10	1079.27	0.248978	0.0989916	2.51514	0.0118985	0.0332471
ACTR1A	3775.12	0.169615	0.0706494	2.4008	0.0163592	0.0439513
ACTR1B	1111.31	0.628118	0.0938433	6.69327	2.18236e-11	2.05151e-10
ACTR3	5874.43	0.280621	0.0879504	3.19067	0.00141943	0.00498452
ACTR5	581.751	-0.320878	0.109622	-2.92712	0.00342116	0.0109679
ACTR6	733.841	-0.367451	0.119688	-3.07009	0.00213998	0.007207
ACTRT3	65.8684	-1.56766	0.271489	-5.7743	7.72752e-09	5.79256e-08
ACVR1	328.67	-0.35671	0.137931	-2.58614	0.00970573	0.027839
ACVR2B	1756.07	-0.342803	0.102254	-3.35247	0.000800928	0.00296599
ACVR2B-AS1	85.0587	-1.18887	0.255159	-4.65932	3.17263e-06	1.75321e-05
ADA	428.75	-1.26673	0.121467	-10.4285	1.83699e-25	3.77551e-24
ADAD2	3.0401	-2.24031	0.716876	-3.1251	0.00177746	0.00611082
ADAM11	268.693	0.628397	0.164344	3.82366	0.000131484	0.000565131
ADAM12	79.7084	1.33224	0.281544	4.7319	2.22429e-06	1.26064e-05
ADAM15	1349.74	0.57766	0.090466	6.38539	1.70962e-10	1.49927e-09
ADAM17	1110.29	0.313122	0.0892707	3.50755	0.000452254	0.00175408
ADAM23	1063.58	-0.944486	0.101982	-9.2613	2.01961e-20	3.3697e-19
ADAM28	6.40306	-1.97258	0.657861	-2.99848	0.00271331	0.00891347
ADAM33	345.269	-0.741259	0.182196	-4.06848	4.73214e-05	0.000220359
ADAMTS1	793.227	0.58127	0.0985325	5.89927	3.65116e-09	2.81533e-08
ADAMTS12	892.468	0.560742	0.140622	3.98757	6.67523e-05	0.00030304
ADAMTS13	305.877	0.574404	0.159036	3.61178	0.000304106	0.00121923
ADAMTS14	28.7713	-2.21179	0.406756	-5.43764	5.39911e-08	3.71489e-07
ADAMTS15	723.518	3.1741	0.154314	20.5691	5.19406e-94	5.48726e-92
ADAMTS17	320.828	2.88078	0.155501	18.5258	1.27906e-76	1.02181e-74
ADAMTS19	1103.76	0.439455	0.122432	3.58939	0.000331454	0.00132091
ADAMTS2	55.436	-0.735149	0.294742	-2.49421	0.0126238	0.0350225
ADAMTS20	162.513	0.533223	0.208456	2.55796	0.0105287	0.0298437
ADAMTS4	566.233	-1.42277	0.136148	-10.4502	1.46251e-25	3.02235e-24
ADAMTS5	22.2947	-3.49857	0.506048	-6.9135	4.72838e-12	4.71129e-11
ADAMTS6	150.226	0.873744	0.184444	4.73718	2.1671e-06	1.23038e-05
ADAMTS7	1526.48	-0.41313	0.133923	-3.08484	0.00203659	0.00689477
ADAMTS8	284.04	-6.08504	0.292245	-20.8217	2.74973e-96	3.00319e-94
ADAMTS9	180.011	1.8063	0.17894	10.0945	5.84513e-24	1.13528e-22
ADAMTSL2	122.288	0.625874	0.236741	2.64371	0.0082003	0.0239751
ADAMTSL4	66.3237	-1.25889	0.303822	-4.1435	3.42049e-05	0.000163317
ADAR	14963.3	-0.483598	0.0703614	-6.87305	6.28435e-12	6.17725e-11
ADARB1	492.935	0.602861	0.128621	4.68709	2.77113e-06	1.54691e-05
ADARB2	16.8309	-2.08024	0.517878	-4.01685	5.89824e-05	0.000269879
ADCK3	698.927	-0.646363	0.133258	-4.85048	1.23161e-06	7.23417e-06
ADCK5	73.5368	1.28086	0.267781	4.78322	1.72507e-06	9.944e-06
ADCY1	1092.97	0.738707	0.104099	7.09621	1.28223e-12	1.32732e-11
ADCY2	976.899	-0.952321	0.125594	-7.58251	3.38923e-14	3.94155e-13
ADCY6	2266.28	1.57769	0.255141	6.18359	6.26589e-10	5.18329e-09
ADCY9	198.572	-1.21052	0.177226	-6.83037	8.46979e-12	8.25011e-11
ADCYAP1R1	731.6	-1.52852	0.112753	-13.5563	7.26816e-42	2.55153e-40
ADD1	5511.53	0.333906	0.0695198	4.80303	1.56282e-06	9.06185e-06
ADD2	5012.25	-1.03919	0.08264	-12.5749	2.90032e-36	8.61636e-35
ADD3	2700.16	-0.873199	0.0998021	-8.74931	2.14656e-18	3.18853e-17
ADGRA2	160.001	-4.34351	0.257138	-16.8917	5.17631e-64	3.1124e-62
ADGRB1	671.548	-0.633377	0.159072	-3.98171	6.84221e-05	0.000309997
ADGRB2	1209.42	-0.270531	0.103862	-2.60471	0.0091951	0.0265529
ADGRD1	12.8682	-1.73016	0.520532	-3.32383	0.000887914	0.00326194
ADGRD2	6.78083	-1.67014	0.639155	-2.61304	0.00897407	0.0259777
ADGRE5	340.961	1.74877	0.162932	10.7332	7.11252e-27	1.54318e-25
ADGRF3	39.661	-1.0758	0.321741	-3.34369	0.000826728	0.00305303
ADGRF5	49.5528	-3.34852	0.39333	-8.51325	1.69128e-17	2.38233e-16
ADGRG1	82.5705	1.38623	0.307792	4.50377	6.67591e-06	3.52638e-05
ADGRG2	147.157	-4.46164	0.274064	-16.2795	1.37911e-59	7.54937e-58
ADGRG5	153.008	-4.34529	0.262163	-16.5748	1.06093e-61	6.0723e-60
ADGRG6	104.942	1.71233	0.234614	7.29849	2.9101e-13	3.16763e-12
ADGRL1	4073.97	-0.582291	0.107993	-5.39195	6.96968e-08	4.72901e-07
ADGRL2	7962.18	0.263416	0.1083	2.4323	0.0150034	0.0407837
ADGRL3	838.201	1.54121	0.0995195	15.4865	4.27788e-54	2.07542e-52
ADGRL4	121.144	1.29512	0.207677	6.23623	4.48253e-10	3.75615e-09
ADGRV1	1048.11	1.27525	0.306307	4.16331	3.13664e-05	0.000150527
ADIPOR2	3133.32	0.479166	0.0873637	5.48473	4.14099e-08	2.88149e-07
ADIRF-AS1	135.708	-0.467159	0.191453	-2.44007	0.0146843	0.0400317
ADM	760.844	-4.04626	0.134744	-30.0293	4.06411e-198	1.95492e-195
ADM2	206.515	-2.04062	0.18627	-10.9552	6.27459e-28	1.4073e-26
ADORA1	264.788	0.845736	0.144699	5.84481	5.07148e-09	3.85788e-08
ADORA2B	95.7634	-0.774952	0.223193	-3.47211	0.000516378	0.00198306
ADPGK	1729.3	0.233966	0.081431	2.87318	0.0040636	0.0128131
ADPRH	152.185	-1.07549	0.178865	-6.01286	1.82277e-09	1.4427e-08
ADRA1D	74.0572	-5.13189	0.421147	-12.1855	3.71282e-34	1.0312e-32
ADRA2B	163.67	-0.905394	0.227784	-3.97479	7.04419e-05	0.000318447
ADRA2C	958.474	4.76742	0.15038	31.7024	1.43796e-220	8.33574e-218
ADRB1	2.91413	2.06847	0.716322	2.88763	0.00388154	0.0122836
ADSL	4545.71	-0.331255	0.0728913	-4.54451	5.5062e-06	2.93872e-05
ADSS	2134.15	-0.384163	0.10024	-3.83244	0.000126879	0.000546586
AEBP1	1542.28	0.588005	0.0934392	6.29291	3.11567e-10	2.65607e-09
AEBP2	870.416	-0.63781	0.110062	-5.79498	6.83297e-09	5.13734e-08
AES	1758.15	-1.76401	0.378075	-4.66576	3.07472e-06	1.70417e-05
AF064860.7	14.9388	-1.32496	0.514554	-2.57497	0.010025	0.0286276
AFAP1	803.073	0.545524	0.113707	4.79764	1.60547e-06	9.29247e-06
AFAP1L2	611.346	3.95726	0.155226	25.4936	2.32213e-143	5.3029e-141
AFF1	1335.54	0.534114	0.0971701	5.49669	3.86992e-08	2.70118e-07
AFF2	188.876	1.27276	0.209492	6.07548	1.23614e-09	9.95958e-09
AFF3	358.532	1.32702	0.142669	9.30139	1.38617e-20	2.33174e-19
AFG3L1P	877.801	0.310054	0.115548	2.68334	0.00728908	0.021595
AFG3L2	2116.9	-0.261229	0.0784116	-3.33151	0.000863761	0.00317785
AFMID	495.585	-0.332832	0.111321	-2.98985	0.00279117	0.009144
AFP	43.0316	-2.32382	0.44389	-5.23513	1.64871e-07	1.0748e-06
AFTPH	331.41	-0.780558	0.148828	-5.24471	1.56529e-07	1.02337e-06
AGAP1	1403.93	0.759567	0.0913672	8.31335	9.30378e-17	1.25576e-15
AGBL5	1757.6	0.498877	0.0930548	5.36111	8.27099e-08	5.57017e-07
AGER	244.635	0.776626	0.165248	4.69976	2.60462e-06	1.45936e-05
AGFG1	2586.45	-0.239805	0.0814284	-2.94498	0.00322979	0.0104075
AGFG2	122.337	1.02056	0.197515	5.16701	2.37862e-07	1.52556e-06
AGMAT	131.349	-1.20354	0.190688	-6.31155	2.76262e-10	2.3739e-09
AGO1	1879.09	-0.345967	0.0858809	-4.02845	5.61454e-05	0.000258415
AGO2	2142.08	-0.271229	0.098531	-2.75272	0.00591017	0.0179496
AGPAT2	286.683	-1.72414	0.161444	-10.6795	1.27006e-26	2.71908e-25
AGPAT4	1563.77	0.54689	0.0967776	5.65099	1.59522e-08	1.1589e-07
AGPAT5	3081.02	-0.417825	0.0911899	-4.58192	4.60719e-06	2.48709e-05
AGR2	39.2997	3.82871	0.700297	5.46727	4.57017e-08	3.16649e-07
AGRN	7729.54	1.3151	0.127883	10.2836	8.35292e-25	1.67711e-23
AHCY	7400.66	-0.333864	0.0700274	-4.76763	1.86407e-06	1.06745e-05
AHDC1	1901.36	1.32218	0.120757	10.9491	6.71254e-28	1.50255e-26
AHI1	501.705	0.522498	0.11758	4.44377	8.8398e-06	4.58477e-05
AHNAK	1526.03	5.86761	0.281546	20.8407	1.8521e-96	2.04255e-94
AHNAK2	33.3987	1.19868	0.369711	3.24222	0.00118601	0.00424267
AHSA1	3940.31	-0.216821	0.0801927	-2.70374	0.00685629	0.0204738
AHSA2	1173.81	-0.294053	0.0976234	-3.01212	0.00259433	0.00856493
AHSG	7.61724	-3.13098	0.674433	-4.64238	3.44411e-06	1.89267e-05
AHSP	12.2532	-2.41539	0.579481	-4.16819	3.07026e-05	0.000147623
AIF1	267.376	-1.5217	0.227744	-6.6816	2.36342e-11	2.21802e-10
AIF1L	7146.52	-0.676325	0.0738179	-9.16206	5.0915e-20	8.3051e-19
AIFM1	1878.45	-0.342424	0.0878016	-3.89997	9.6204e-05	0.000424221
AIFM2	162.71	-1.11894	0.248594	-4.50106	6.7614e-06	3.5682e-05
AIM1	31.4762	-1.29053	0.356182	-3.62324	0.000290935	0.00117037
AIM1L	209.785	0.602881	0.177277	3.40079	0.000671915	0.00252887
AIMP1	1411.55	-0.283827	0.0916753	-3.096	0.0019615	0.00667153
AIP	509.465	0.519867	0.133024	3.90807	9.30369e-05	0.000411701
AJ006998.2	8.17124	2.42998	0.667509	3.64036	0.000272253	0.00110115
AJAP1	894.827	1.96824	0.171277	11.4916	1.45472e-30	3.58261e-29
AJUBA	1588.85	0.936551	0.0989654	9.46342	2.98037e-21	5.15927e-20
AK2	3638.95	-0.335693	0.0713501	-4.70487	2.54023e-06	1.42576e-05
AK3	931.847	1.10924	0.101905	10.885	1.35883e-27	3.01773e-26
AK4	3148.7	-3.5213	0.295532	-11.9151	9.8736e-33	2.61998e-31
AK4P1	19.934	-3.22548	0.511273	-6.30874	2.81323e-10	2.41555e-09
AK5	72.3763	-3.00081	0.289495	-10.3657	3.55228e-25	7.24166e-24
AK6	577.859	-0.343786	0.122099	-2.81563	0.00486819	0.0150829
AK8	20.0344	1.22615	0.440339	2.78456	0.00536008	0.0164571
AKAIN1	5.86094	2.41688	0.705887	3.42389	0.000617325	0.00233738
AKAP1	1895.7	-0.916301	0.0876119	-10.4586	1.33775e-25	2.77467e-24
AKAP11	1648.73	0.34395	0.106033	3.24381	0.00117941	0.00422236
AKAP12	5526.32	0.42829	0.105182	4.07187	4.66364e-05	0.000217483
AKAP13	1526.64	0.348999	0.091679	3.80674	0.000140808	0.000602343
AKAP2	12.6168	-1.69146	0.529955	-3.19169	0.00141441	0.00496767
AKAP3	53.5708	0.917111	0.29037	3.15842	0.00158626	0.00552066
AKAP5	212.758	0.555583	0.214624	2.58864	0.00963557	0.0276623
AKAP6	42.464	1.39614	0.331292	4.21421	2.50657e-05	0.000122078
AKAP7	277.255	-1.42887	0.165197	-8.64953	5.17133e-18	7.55743e-17
AKAP9	1184.73	0.445161	0.108399	4.10667	4.01396e-05	0.000189021
AKIRIN1	5643.28	-0.236281	0.0761516	-3.10276	0.00191722	0.00654158
AKIRIN2	1448.84	-0.373733	0.0851214	-4.39059	1.13044e-05	5.79394e-05
AKNA	1568.79	-1.42265	0.139579	-10.1924	2.14295e-24	4.22755e-23
AKR1A1	2559.46	-0.324318	0.0781333	-4.15083	3.31276e-05	0.000158508
AKR1C1	43.9284	0.960209	0.310763	3.08984	0.00200263	0.00679607
AKR1C3	37.9748	-2.62851	0.378868	-6.93781	3.98238e-12	3.99086e-11
AKR7A2	929.712	0.457626	0.100615	4.5483	5.40807e-06	2.88771e-05
AKT1	1618.73	0.797138	0.0935937	8.51701	1.63726e-17	2.30912e-16
AKTIP	283.315	-0.454454	0.147826	-3.07426	0.00211027	0.00711863
AL132709.1	14.3784	-2.37734	0.531998	-4.4687	7.86978e-06	4.11444e-05
AL133493.2	12.8671	-1.66305	0.524637	-3.1699	0.00152491	0.00532598
AL137860.1	3.56985	-2.09732	0.711295	-2.94859	0.00319227	0.0102998
ALAS1	1623.83	-0.412708	0.0838722	-4.92067	8.62489e-07	5.14897e-06
ALCAM	1121.11	-2.36597	0.108177	-21.8714	4.86902e-106	6.29021e-104
ALDH18A1	4342.01	-0.299721	0.0717904	-4.17494	2.98062e-05	0.000143649
ALDH1A1	18.3688	-4.74977	0.632453	-7.51006	5.90983e-14	6.7719e-13
ALDH1A2	83.0295	4.50632	0.380393	11.8465	2.24392e-32	5.88522e-31
ALDH1B1	1851.32	-0.705054	0.0877871	-8.03141	9.63592e-16	1.24048e-14
ALDH3A2	1754.49	-0.526342	0.0806105	-6.52945	6.60137e-11	5.99613e-10
ALDH5A1	306.514	0.497729	0.136873	3.63642	0.000276456	0.0011161
ALDOC	523.12	-0.761437	0.122369	-6.22249	4.89324e-10	4.07725e-09
ALG1	792.279	-0.292224	0.112157	-2.60548	0.00917451	0.0265104
ALG10B	159.422	0.577448	0.187897	3.07321	0.00211767	0.00714147
ALG12	372.558	-0.435867	0.135575	-3.21494	0.0013047	0.00462475
ALG3	1210.39	-0.565631	0.104373	-5.41932	5.98266e-08	4.09494e-07
ALG6	1322.19	-0.403459	0.0987913	-4.08395	4.42757e-05	0.000207245
ALG9	255.406	0.978626	0.168171	5.81924	5.91161e-09	4.46989e-08
ALK	6.7688	1.51606	0.641645	2.36277	0.0181389	0.0480569
ALKBH2	525.763	-1.00126	0.115912	-8.6381	5.71544e-18	8.33643e-17
ALKBH6	115.174	-0.703613	0.202333	-3.4775	0.000506113	0.00194695
ALKBH8	593.059	-0.426419	0.116516	-3.65976	0.000252454	0.00102671
ALOX12	62.2623	-1.07033	0.279496	-3.8295	0.000128403	0.000552731
ALOX12P2	193.279	-1.48225	0.181274	-8.17686	2.91335e-16	3.85402e-15
ALOX15	11.2254	-1.58545	0.552556	-2.86931	0.00411371	0.0129585
ALOXE3	18.2347	3.7327	0.586624	6.36302	1.97822e-10	1.72678e-09
ALPK2	75.4618	4.30098	0.369039	11.6545	2.17548e-31	5.51381e-30
ALPL	4520.91	0.599694	0.0741179	8.09109	5.91354e-16	7.68795e-15
ALS2CL	100.807	-2.93749	0.249589	-11.7693	5.61667e-32	1.45788e-30
ALX3	4.17425	2.19624	0.70663	3.10805	0.00188328	0.00643356
ALX4	15.9431	4.26987	0.652884	6.54001	6.15144e-11	5.60548e-10
AMD1	6229	-0.315471	0.0870505	-3.624	0.000290085	0.00116757
AMDHD1	12.9343	1.57941	0.553597	2.853	0.00433081	0.0135667
AMER2	10.9583	2.43452	0.596905	4.07857	4.53127e-05	0.000211659
AMFR	632.823	0.554653	0.107223	5.1729	2.30485e-07	1.48076e-06
AMH	845.849	0.499676	0.16398	3.04718	0.00230997	0.00773229
AMHR2	37.2184	1.80582	0.359026	5.02977	4.91064e-07	3.02671e-06
AMIGO1	122.1	-0.811363	0.209897	-3.86554	0.000110845	0.000484062
AMIGO2	832.725	-0.363417	0.119649	-3.03735	0.00238665	0.00795948
AMMECR1	849.689	-0.991224	0.104993	-9.44088	3.69666e-21	6.35061e-20
AMOT	1072.53	2.06991	0.111315	18.595	3.52784e-77	2.83834e-75
AMOTL1	6120.36	1.59311	0.0820119	19.4253	4.71673e-84	4.29983e-82
AMOTL2	2658.57	1.6833	0.0995874	16.9027	4.29487e-64	2.59621e-62
AMPD2	1238.17	0.376527	0.0999674	3.7665	0.000165551	0.000698799
AMPD3	181.858	-0.94365	0.166812	-5.65697	1.54069e-08	1.12144e-07
AMPH	490.532	0.55734	0.122751	4.54043	5.61408e-06	2.99206e-05
AMT	36.638	-1.00965	0.343615	-2.93833	0.00329991	0.0106108
ANAPC13	1123.53	0.522601	0.0937038	5.57716	2.44474e-08	1.73862e-07
ANAPC4	1391.23	-0.459929	0.0882073	-5.21418	1.84635e-07	1.19709e-06
ANGPT1	42.4571	-2.21755	0.345625	-6.41607	1.39835e-10	1.23347e-09
ANGPT2	27.6048	3.96772	0.523669	7.57677	3.54255e-14	4.1135e-13
ANGPT4	38.542	-1.6459	0.348709	-4.71999	2.35861e-06	1.33076e-05
ANGPTL1	43.9835	1.52821	0.400278	3.81788	0.000134604	0.000577773
ANGPTL2	682.485	0.682202	0.107463	6.34827	2.17755e-10	1.89347e-09
ANGPTL4	35.1957	-2.30053	0.382973	-6.00704	1.88943e-09	1.4941e-08
ANK1	89.8173	-1.11595	0.239861	-4.6525	3.27941e-06	1.80738e-05
ANK2	1332.88	-0.892675	0.119847	-7.44843	9.44565e-14	1.06827e-12
ANK3	632.28	-0.492743	0.124509	-3.95749	7.57407e-05	0.000340224
ANKEF1	340.3	-0.801062	0.140375	-5.70658	1.15267e-08	8.494e-08
ANKIB1	1790.97	-0.454406	0.0971796	-4.67594	2.92613e-06	1.6282e-05
ANKMY1	166.131	0.733658	0.184866	3.96859	7.22987e-05	0.000325863
ANKMY2	446.292	0.692839	0.151978	4.55882	5.14424e-06	2.75464e-05
ANKRD1	116.231	3.90009	0.300667	12.9715	1.77624e-38	5.70415e-37
ANKRD10	2871.5	0.203788	0.0761512	2.6761	0.00744845	0.0220181
ANKRD13B	537.974	-0.73962	0.11481	-6.44211	1.17824e-10	1.04749e-09
ANKRD13D	588.998	0.311639	0.118486	2.63018	0.00853391	0.0248307
ANKRD18A	186.487	0.447338	0.162994	2.74451	0.00606013	0.0183386
ANKRD18CP	143.349	-4.15685	0.262064	-15.8619	1.16261e-56	5.98733e-55
ANKRD24	138.923	-2.46068	0.212883	-11.5589	6.65779e-31	1.6577e-29
ANKRD26	804.107	0.380911	0.131777	2.89058	0.00384532	0.0121809
ANKRD27	1037.38	-0.570845	0.105175	-5.42758	5.71217e-08	3.91098e-07
ANKRD28	1406.82	-0.517468	0.0899412	-5.7534	8.74652e-09	6.52396e-08
ANKRD33B	340.353	-2.12957	0.142009	-14.996	7.79491e-51	3.45544e-49
ANKRD35	141.783	-0.683357	0.195959	-3.48724	0.000488026	0.00188346
ANKRD36	140.8	0.814443	0.200934	4.05328	5.05036e-05	0.000234116
ANKRD36B	119.67	0.823704	0.217642	3.78468	0.000153905	0.000653425
ANKRD36C	89.6555	0.759842	0.245159	3.09939	0.00193919	0.00660557
ANKRD42	231.197	0.580411	0.156267	3.71422	0.000203829	0.000844295
ANKRD45	125.502	0.694797	0.193882	3.58361	0.000338872	0.00134881
ANKRD46	990.279	0.684899	0.135011	5.07291	3.91779e-07	2.44525e-06
ANKRD52	3098.21	0.365788	0.0856516	4.27065	1.94905e-05	9.64628e-05
ANKRD53	19.3416	2.57329	0.493248	5.21704	1.81807e-07	1.17961e-06
ANKRD54	395.061	0.558213	0.131574	4.24258	2.20966e-05	0.000108553
ANKRD6	232.127	-0.948575	0.165259	-5.73994	9.47115e-09	7.03891e-08
ANKRD65	17.0838	2.14273	0.508849	4.21094	2.54313e-05	0.000123619
ANKRD66	3.28589	1.99615	0.714869	2.79233	0.00523302	0.0161051
ANKS6	1688.9	-0.396857	0.0894648	-4.4359	9.16871e-06	4.74122e-05
ANKZF1	1079.75	-0.602718	0.0906444	-6.64926	2.94563e-11	2.74618e-10
ANO10	1028.42	-0.231115	0.0925752	-2.49652	0.012542	0.0348213
ANO3	10.6714	1.46725	0.5744	2.5544	0.0106371	0.0300907
ANO5	195.736	-1.26324	0.18507	-6.82572	8.74861e-12	8.51069e-11
ANO6	3149.98	-0.394795	0.0837867	-4.71191	2.45411e-06	1.38051e-05
ANO8	958.381	-0.978064	0.144906	-6.74965	1.48199e-11	1.41311e-10
ANO9	121.378	-2.30468	0.221788	-10.3914	2.714e-25	5.54774e-24
ANOS1	1851.72	-1.81261	0.495581	-3.65754	0.000254644	0.00103469
ANOS2P	138.131	-2.14932	0.206666	-10.4	2.48011e-25	5.08343e-24
ANP32A	12609.9	0.380551	0.0731678	5.20107	1.98146e-07	1.28028e-06
ANP32B	6203.44	0.683735	0.0804291	8.50109	1.87822e-17	2.63743e-16
ANPEP	64.9314	-0.961742	0.288227	-3.33676	0.00084762	0.00312254
ANTXR1	2812.03	0.360384	0.0809483	4.45203	8.50623e-06	4.42293e-05
ANTXR2	981.385	2.09291	0.128435	16.2955	1.06249e-59	5.83029e-58
ANXA1	515.161	3.00397	0.137842	21.7929	2.7114e-105	3.48291e-103
ANXA11	754.762	-1.0364	0.105442	-9.82909	8.43807e-23	1.56239e-21
ANXA2	5390.95	1.0261	0.0957184	10.72	8.19754e-27	1.7718e-25
ANXA3	356.715	-0.68619	0.167406	-4.09896	4.15014e-05	0.000195187
ANXA4	200.571	0.644921	0.160344	4.02211	5.7679e-05	0.000264558
ANXA5	9994.28	-0.544674	0.0779948	-6.98347	2.87972e-12	2.90775e-11
ANXA6	4509.87	0.306403	0.0845506	3.6239	0.000290193	0.0011678
ANXA7	1480.58	-0.509609	0.0839907	-6.06745	1.29955e-09	1.04445e-08
ANXA9	120.788	-1.29761	0.208672	-6.21842	5.02182e-10	4.17715e-09
AOC2	70.6156	0.586273	0.247199	2.37167	0.0177081	0.047055
AOC3	62.5625	1.48342	0.291143	5.09515	3.48471e-07	2.19144e-06
AP000221.1	35.4292	1.2314	0.356902	3.45026	0.000560049	0.00213662
AP000432.1	27.9165	1.41366	0.394494	3.58348	0.000339046	0.00134926
AP000662.4	288.515	0.848509	0.145679	5.8245	5.72844e-09	4.33864e-08
AP000688.29	120.155	-1.36886	0.218047	-6.27784	3.43314e-10	2.90916e-09
AP000892.6	127.475	3.44153	0.263286	13.0714	4.79435e-39	1.58235e-37
AP001092.4	6.33581	-1.80091	0.641533	-2.80719	0.00499751	0.0154434
AP001258.4	26.447	-2.82465	0.444119	-6.36012	2.01591e-10	1.75764e-09
AP002856.5	65.0935	-1.5498	0.277123	-5.59244	2.23899e-08	1.59934e-07
AP003774.6	24.0171	-1.04794	0.40334	-2.59816	0.00937241	0.0270063
AP1M1	1626.21	0.434028	0.0866526	5.00883	5.47615e-07	3.36334e-06
AP1M2	112.779	-1.47709	0.274936	-5.37249	7.76581e-08	5.24558e-07
AP1S1	825.859	-0.350587	0.106263	-3.29923	0.000969506	0.0035404
AP1S2	2740.1	-0.786391	0.132082	-5.95381	2.61973e-09	2.04513e-08
AP1S3	96.5157	-1.61971	0.226442	-7.15285	8.49964e-13	8.96687e-12
AP2M1	10485.1	-0.239081	0.0773243	-3.09192	0.00198863	0.00675364
AP2S1	2358.24	0.303847	0.0921063	3.29887	0.000970751	0.00354437
AP3B2	398.264	0.792413	0.138997	5.70093	1.19156e-08	8.76627e-08
AP3D1	6243.45	-0.242617	0.0770464	-3.14897	0.00163848	0.0056822
AP3M2	1331.05	0.607392	0.0922102	6.58704	4.48694e-11	4.13538e-10
AP4S1	282.809	-0.505282	0.146833	-3.4412	0.00057913	0.00220495
AP5B1	139.182	-1.08332	0.204585	-5.29522	1.18876e-07	7.86062e-07
APAF1	962.961	0.576675	0.123951	4.65245	3.28011e-06	1.80738e-05
APBA2	1086.31	0.93727	0.0950649	9.85926	6.25074e-23	1.1631e-21
APBB1	1097.81	0.472768	0.092603	5.10532	3.30242e-07	2.08434e-06
APC2	29.8985	2.57791	0.43354	5.9462	2.74437e-09	2.13433e-08
APCDD1	4387.59	2.23604	0.356158	6.27823	3.42448e-10	2.90291e-09
APCDD1L	96.3767	-6.01773	0.452342	-13.3035	2.20906e-40	7.52147e-39
APCDD1L-AS1	6.94206	-2.09019	0.657713	-3.17796	0.00148314	0.00519134
APEH	3835.11	-0.37557	0.0808148	-4.64729	3.36326e-06	1.85094e-05
APELA	665.197	-3.39073	0.413745	-8.19522	2.50143e-16	3.32661e-15
APH1B	287.089	-0.552958	0.144228	-3.83391	0.000126122	0.000543782
APIP	514.83	-0.554382	0.122358	-4.5308	5.87613e-06	3.12215e-05
APLN	154.859	-2.11753	0.251153	-8.43125	3.41992e-17	4.72891e-16
APLNR	8642	3.52976	0.248914	14.1807	1.20721e-45	4.7882e-44
APLP1	504.878	0.523624	0.120545	4.34379	1.40045e-05	7.0815e-05
APLP2	16404.1	0.496036	0.069896	7.09677	1.27709e-12	1.3226e-11
APMAP	3292.72	0.30728	0.0877509	3.50173	0.000462248	0.001791
APOBEC3B	58.374	-1.79639	0.283312	-6.34066	2.28787e-10	1.9871e-09
APOBEC3D	32.0062	-2.06411	0.37278	-5.53706	3.07587e-08	2.16904e-07
APOC1	526.562	-0.615588	0.118127	-5.21125	1.87577e-07	1.21476e-06
APOE	6017.34	-0.666094	0.114411	-5.82195	5.81642e-09	4.40233e-08
APOL2	434.703	-1.57308	0.130806	-12.0261	2.5914e-33	6.99121e-32
APOL6	5.04047	-1.90406	0.672097	-2.83301	0.00461117	0.0143693
APOLD1	108.212	1.42504	0.221875	6.42269	1.33883e-10	1.1842e-09
APP	20911	0.308096	0.0654911	4.70439	2.54625e-06	1.42878e-05
APPBP2	1042.28	0.575372	0.101678	5.65879	1.52447e-08	1.11035e-07
APPL1	1281.41	-0.840665	0.137118	-6.13095	8.73548e-10	7.13224e-09
APPL2	1140.86	0.487437	0.0890911	5.47122	4.4695e-08	3.10054e-07
APRT	2470.75	-0.71825	0.0944807	-7.60209	2.91386e-14	3.40799e-13
AQP5	9.1744	-1.39368	0.579214	-2.40616	0.0161212	0.0434098
AQR	2984.85	-0.215014	0.0836782	-2.56954	0.0101834	0.0290077
AR	432.717	-0.36993	0.126644	-2.92102	0.00348887	0.0111581
ARAP2	32.0884	-1.75382	0.366019	-4.7916	1.65456e-06	9.55463e-06
ARAP3	2006.56	-1.37875	0.0913277	-15.0968	1.70049e-51	7.75095e-50
ARC	646.055	-2.97323	0.176043	-16.8892	5.39937e-64	3.2379e-62
ARF1	6336.87	0.224046	0.0750322	2.98599	0.00282661	0.00925206
ARF5	2304.08	0.188884	0.0805189	2.34584	0.0189843	0.0499763
ARF6	2544.31	0.250889	0.087842	2.85613	0.00428836	0.0134542
ARFGAP3	496.099	0.872629	0.124154	7.02861	2.08598e-12	2.12911e-11
ARFGEF1	2680.9	-0.547804	0.0985384	-5.5593	2.70866e-08	1.92027e-07
ARFGEF3	282.597	-4.01082	0.202505	-19.806	2.64137e-87	2.53035e-85
ARFIP2	1508.23	-0.324455	0.0903559	-3.59086	0.000329595	0.00131466
ARG2	426.117	0.3894	0.130097	2.99316	0.00276108	0.0090533
ARHGAP1	1665.18	-0.463631	0.113127	-4.09831	4.16175e-05	0.000195611
ARHGAP10	140.356	2.46889	0.304659	8.1038	5.3268e-16	6.95313e-15
ARHGAP11B	757.342	0.301455	0.104513	2.88437	0.00392192	0.0124079
ARHGAP12	1693.5	-0.307073	0.0872884	-3.51792	0.00043495	0.0016919
ARHGAP17	2205.45	0.230737	0.0779961	2.95831	0.0030933	0.0100076
ARHGAP18	147.29	-1.54723	0.225983	-6.84668	7.55821e-12	7.38763e-11
ARHGAP21	1808.11	0.604754	0.0956546	6.32227	2.57753e-10	2.22246e-09
ARHGAP22	119.04	-1.95164	0.253769	-7.69061	1.46432e-14	1.7433e-13
ARHGAP23	2135.03	-0.625743	0.105097	-5.95398	2.61693e-09	2.04365e-08
ARHGAP24	271.382	4.60945	0.268051	17.1962	2.83704e-66	1.78166e-64
ARHGAP26	342.887	-0.438907	0.144803	-3.03105	0.00243702	0.00810952
ARHGAP27	298.15	-0.757334	0.184633	-4.10183	4.09887e-05	0.000192856
ARHGAP28	1010.14	-0.572925	0.0966704	-5.92658	3.09308e-09	2.39562e-08
ARHGAP29	332.031	3.64619	0.174973	20.8386	1.93312e-96	2.12155e-94
ARHGAP30	68.207	-1.09747	0.25424	-4.31667	1.58402e-05	7.94575e-05
ARHGAP32	1094.12	0.664321	0.0977573	6.79562	1.0785e-11	1.03934e-10
ARHGAP33	819.134	0.624452	0.133869	4.66467	3.09117e-06	1.71287e-05
ARHGAP36	3.88657	2.09777	0.709723	2.95577	0.00311894	0.0100762
ARHGAP39	657.953	0.441648	0.122578	3.603	0.000314571	0.00125895
ARHGAP4	520.54	-2.13891	0.128133	-16.6929	1.4766e-62	8.58175e-61
ARHGAP40	11.5005	-2.41842	0.573883	-4.21414	2.50734e-05	0.000122089
ARHGAP42	487.47	0.432454	0.130596	3.3114	0.000928308	0.00339929
ARHGAP44	298.391	-0.439327	0.142626	-3.08026	0.00206818	0.00699114
ARHGAP6	54.1017	2.27572	0.315416	7.21497	5.39465e-13	5.79117e-12
ARHGAP8	14.1815	-2.24261	0.522888	-4.28888	1.79574e-05	8.93836e-05
ARHGAP9	43.1431	-1.52199	0.370014	-4.11334	3.89976e-05	0.000184101
ARHGDIA	2834.82	0.454115	0.0839331	5.41044	6.28695e-08	4.29153e-07
ARHGDIB	23.5183	1.14527	0.439854	2.60375	0.00922112	0.0266145
ARHGEF1	1351.68	-0.718491	0.104376	-6.8837	5.83167e-12	5.74477e-11
ARHGEF11	3117.12	0.237269	0.0850378	2.79016	0.00526827	0.0162048
ARHGEF12	2233.58	0.322024	0.0885139	3.63812	0.000274634	0.00110973
ARHGEF16	488.334	-1.47369	0.152401	-9.66984	4.05013e-22	7.25557e-21
ARHGEF17	1208.23	1.73195	0.103155	16.7898	2.90048e-63	1.70766e-61
ARHGEF2	3874.81	0.422251	0.0881254	4.79148	1.65559e-06	9.55813e-06
ARHGEF25	333.231	0.457766	0.180013	2.54296	0.0109918	0.0309739
ARHGEF26	515.716	0.713181	0.146404	4.87134	1.10845e-06	6.54644e-06
ARHGEF26-AS1	3.75072	1.73144	0.706761	2.44982	0.0142928	0.039139
ARHGEF28	48.1892	3.75753	0.423689	8.86861	7.40665e-19	1.13757e-17
ARHGEF3	137.479	0.533925	0.199908	2.67086	0.00756575	0.022324
ARHGEF34P	17.6813	-1.39795	0.462848	-3.02034	0.00252495	0.00836765
ARHGEF35	71.1882	-1.82801	0.268843	-6.79956	1.04939e-11	1.013e-10
ARHGEF37	45.4752	1.31324	0.313455	4.18956	2.79497e-05	0.000135192
ARHGEF39	684.976	-0.606	0.111477	-5.43608	5.4467e-08	3.74282e-07
ARHGEF4	339.797	-1.05812	0.132503	-7.98561	1.39834e-15	1.77904e-14
ARHGEF40	3557.89	-0.478741	0.111973	-4.27551	1.90698e-05	9.45254e-05
ARHGEF5	136.728	-1.18675	0.189408	-6.26558	3.71429e-10	3.13565e-09
ARHGEF6	180.4	-0.699419	0.185338	-3.77375	0.000160814	0.000680329
ARID3A	4465.32	1.85203	0.083807	22.0988	3.24663e-108	4.31764e-106
ARID3B	4833.07	-0.442822	0.0746282	-5.93371	2.96162e-09	2.29696e-08
ARID4A	721.791	0.431049	0.116358	3.70451	0.000211797	0.000874735
ARID4B	1467.28	0.306323	0.105798	2.89535	0.00378741	0.0120193
ARID5B	139.669	1.58712	0.198411	7.99915	1.25279e-15	1.60018e-14
ARIH2	2816.22	-0.317367	0.0774867	-4.09576	4.20779e-05	0.000197651
ARL10	524.658	0.721042	0.168938	4.26809	1.97151e-05	9.74249e-05
ARL11	24.9468	-1.69037	0.422097	-4.0047	6.20964e-05	0.000283382
ARL13B	454.121	0.799496	0.122411	6.53124	6.52281e-11	5.92716e-10
ARL2	833.126	-0.569662	0.113169	-5.03371	4.81072e-07	2.9716e-06
ARL3	1173.96	0.550519	0.0976412	5.63818	1.71854e-08	1.24209e-07
ARL4A	614.762	0.811962	0.131788	6.16113	7.22287e-10	5.9488e-09
ARL4C	933.439	2.29386	0.106994	21.4391	5.77191e-102	6.97814e-100
ARL4D	368.113	1.52825	0.178205	8.5758	9.84016e-18	1.40623e-16
ARL6	230.539	0.427665	0.175205	2.44094	0.0146492	0.0399649
ARL6IP1	7073.28	0.602581	0.0887376	6.7906	1.11672e-11	1.07524e-10
ARL6IP6	999.582	0.256649	0.103117	2.48891	0.0128135	0.0354488
ARL8A	758.943	-0.318422	0.103013	-3.0911	0.00199417	0.00677043
ARL8B	1807.62	0.244187	0.090547	2.6968	0.0070009	0.0208526
ARL9	20.5145	2.04231	0.491599	4.15443	3.26094e-05	0.000156161
ARMC10	1031.71	-0.297056	0.102002	-2.91227	0.00358818	0.0114465
ARMC3	38.0952	2.21048	0.47262	4.67709	2.90976e-06	1.62029e-05
ARMC9	1022.84	0.315556	0.101007	3.12409	0.00178355	0.00612784
ARMCX2	3902.32	-0.934041	0.101531	-9.19958	3.59335e-20	5.89968e-19
ARMCX3	1095.32	0.56281	0.102947	5.46701	4.57699e-08	3.17024e-07
ARMT1	1744.92	-0.494853	0.0945432	-5.23414	1.65751e-07	1.07991e-06
ARNT2	1168.2	1.71256	0.101377	16.893	5.06214e-64	3.05186e-62
ARPC1A	3227.32	0.190666	0.078197	2.43828	0.0147574	0.0401969
ARPC2	5010.22	-0.215516	0.0855628	-2.51881	0.0117752	0.0329309
ARPC3	3021.04	-0.33629	0.0971781	-3.46056	0.00053906	0.00206351
ARPC5L	1613.83	-0.369408	0.083138	-4.44332	8.85822e-06	4.59222e-05
ARPIN	686.85	0.524421	0.124463	4.21346	2.51483e-05	0.000122388
ARRB2	1245.67	-0.332017	0.0883026	-3.76	0.000169916	0.000714956
ARRDC1	291.494	-0.408783	0.163327	-2.50285	0.0123198	0.0342717
ARRDC3	1048.57	1.81124	0.128248	14.1229	2.74557e-45	1.07764e-43
ARRDC4	178.656	1.70311	0.180084	9.45731	3.15982e-21	5.45321e-20
ARSB	655.297	0.620766	0.107032	5.7998	6.63931e-09	5.00005e-08
ARSD	95.6503	1.41241	0.234365	6.02656	1.67487e-09	1.33329e-08
ARSE	28.1326	1.28691	0.383952	3.35175	0.000803039	0.00297199
ARSI	448.909	3.31432	0.162115	20.4443	6.7488e-93	6.96698e-91
ARSJ	173.996	-1.69708	0.183519	-9.24747	2.2987e-20	3.81845e-19
ART5	134.981	0.803786	0.21317	3.77064	0.00016283	0.000687702
ARTN	55.1193	-2.54453	0.317812	-8.00642	1.18095e-15	1.51269e-14
ARV1	409.065	-0.38427	0.121961	-3.15078	0.00162837	0.00565414
ARVCF	1488.37	-0.74652	0.126668	-5.8935	3.7809e-09	2.91239e-08
ASB1	1310.42	0.206853	0.0866095	2.38834	0.0169247	0.0453142
ASB13	587.63	0.551332	0.115522	4.77251	1.81942e-06	1.04486e-05
ASCC2	1413.83	0.271274	0.0927011	2.92633	0.00342986	0.0109927
ASF1A	954.575	-0.633329	0.105157	-6.02268	1.71551e-09	1.36266e-08
ASF1B	1537.19	0.742086	0.0897085	8.2722	1.31508e-16	1.76866e-15
ASH1L	1305.42	0.39907	0.100254	3.98059	6.8745e-05	0.000311273
ASH2L	1652.79	0.49422	0.0861476	5.7369	9.64257e-09	7.1522e-08
ASIC1	294.057	0.453335	0.139215	3.25637	0.00112846	0.00405817
ASIC2	147.289	3.3693	0.271539	12.4081	2.36053e-35	6.80701e-34
ASNS	2402.19	-1.13485	0.0880737	-12.8852	5.45154e-38	1.72617e-36
ASPH	1268.63	0.31011	0.102356	3.02972	0.0024478	0.00813821
ASPHD1	141.544	-1.05298	0.204777	-5.14206	2.71745e-07	1.73206e-06
ASPHD2	207.577	-1.06727	0.15979	-6.67921	2.40238e-11	2.25271e-10
ASRGL1	476.507	-0.700176	0.129758	-5.39602	6.81336e-08	4.6285e-07
ASS1	1800.71	0.822415	0.122766	6.69906	2.09758e-11	1.97427e-10
ASTE1	145.664	-0.68873	0.18392	-3.74473	0.000180588	0.000756061
ASTN1	1584.1	0.3515	0.0954279	3.68341	0.000230136	0.000943753
ASUN	1409.01	-0.533385	0.0875083	-6.09525	1.09267e-09	8.84146e-09
ASXL1	2578.68	1.02372	0.0766461	13.3565	1.0856e-40	3.71866e-39
ASXL3	90.5557	4.36506	0.352549	12.3814	3.29464e-35	9.46446e-34
ATAD2	2475.19	0.600344	0.0996496	6.02455	1.69579e-09	1.34947e-08
ATAT1	994.451	0.383113	0.103931	3.68621	0.00022762	0.000934621
ATCAY	438.204	-0.808688	0.126635	-6.38595	1.70331e-10	1.4949e-09
ATF1	798.962	-0.277047	0.102126	-2.71281	0.00667158	0.0199803
ATF3	321.378	1.53155	0.157092	9.7494	1.85567e-22	3.38603e-21
ATF6	1850.52	0.220143	0.0860347	2.55878	0.0105041	0.029789
ATF6B	1316.55	0.390999	0.0981089	3.98535	6.73804e-05	0.000305584
ATF7IP	2983.6	-0.297901	0.0838018	-3.55483	0.000378226	0.00149246
ATF7IP2	668.691	0.461595	0.126237	3.65656	0.000255619	0.00103809
ATG10	375.486	0.37392	0.124441	3.00479	0.00265763	0.00874707
ATG16L1	1252.42	-0.29692	0.0918378	-3.23309	0.0012246	0.00436754
ATG3	1032.85	-0.305041	0.0969774	-3.14549	0.00165811	0.00574065
ATG4C	873.813	-0.394868	0.135073	-2.92336	0.00346272	0.011087
ATG5	605.556	-0.319566	0.123209	-2.5937	0.00949496	0.0273176
ATHL1	1600.36	-1.63155	0.114368	-14.2658	3.57628e-46	1.43866e-44
ATIC	5079.95	-0.840751	0.0787283	-10.6791	1.2745e-26	2.726e-25
ATL1	163.227	0.980789	0.199229	4.92292	8.52641e-07	5.09556e-06
ATL3	404.922	-1.02034	0.126208	-8.0846	6.23711e-16	8.10394e-15
ATOH7	6.13733	-1.94055	0.656488	-2.95596	0.00311696	0.0100721
ATOH8	323.083	3.18087	0.215692	14.7473	3.20396e-49	1.36413e-47
ATP10D	208.211	0.781032	0.160839	4.85599	1.19788e-06	7.04337e-06
ATP11B	842.831	0.350361	0.135337	2.5888	0.00963109	0.0276565
ATP12A	18.1032	-1.42497	0.45438	-3.13607	0.00171226	0.00591004
ATP13A2	1336.09	-0.445561	0.104527	-4.26263	2.02031e-05	9.97055e-05
ATP1A2	18754.9	0.647571	0.107523	6.02264	1.71598e-09	1.36266e-08
ATP1A3	453.513	-1.08939	0.124153	-8.77452	1.71632e-18	2.56462e-17
ATP1B1	2805.44	0.272587	0.0838097	3.25245	0.00114413	0.00410774
ATP1B2	280.211	-1.3961	0.14884	-9.37986	6.60597e-21	1.12715e-19
ATP23	155.406	-0.437354	0.17543	-2.49304	0.0126654	0.0351079
ATP2A3	251.372	-2.34303	0.166908	-14.0379	9.14041e-45	3.52038e-43
ATP2B1	2689.84	0.621238	0.0806358	7.70425	1.31612e-14	1.57516e-13
ATP2B2	27.4924	-2.54836	0.467738	-5.44826	5.08658e-08	3.50709e-07
ATP2B4	2352.1	0.70156	0.12181	5.75946	8.43835e-09	6.3045e-08
ATP4A	11.1634	-1.50311	0.54268	-2.7698	0.00560914	0.0171436
ATP5A1	17722.6	-0.173271	0.069167	-2.50511	0.0122413	0.0340825
ATP5B	21490.1	-0.253617	0.0689316	-3.67925	0.000233918	0.000957872
ATP5C1	4610.27	-0.285431	0.0867281	-3.2911	0.000997972	0.00363378
ATP5D	831.06	-0.399719	0.120302	-3.32264	0.000891686	0.00327473
ATP5E	3465.92	0.574861	0.0920321	6.24631	4.20262e-10	3.52814e-09
ATP5G1	1429.29	-0.234111	0.0908445	-2.57705	0.00996467	0.0284986
ATP5G2	7134.09	0.1935	0.0734709	2.63369	0.00844619	0.0246008
ATP5I	607.637	-0.525939	0.106972	-4.91658	8.80673e-07	5.24921e-06
ATP6AP1	2209.15	0.504374	0.0820033	6.15066	7.71597e-10	6.33416e-09
ATP6AP1L	96.1938	0.553992	0.218737	2.53269	0.0113192	0.0317854
ATP6V0A4	8.89937	-2.87951	0.640939	-4.49264	7.03442e-06	3.70278e-05
ATP6V0D1	1551.27	0.301772	0.094107	3.20669	0.00134273	0.00474689
ATP6V0E2-AS1	63.477	0.953418	0.261982	3.63925	0.000273438	0.00110568
ATP6V1A	1526.05	-0.450098	0.108405	-4.15201	3.29571e-05	0.000157758
ATP6V1B1	10.0196	3.08299	0.648313	4.75541	1.98045e-06	1.12781e-05
ATP6V1C1	1433.21	-0.44124	0.0912031	-4.83799	1.3116e-06	7.67011e-06
ATP7A	201.508	0.587031	0.194341	3.02063	0.00252254	0.00836087
ATP8A1	405.437	-3.00295	0.140641	-21.3518	3.75087e-101	4.43978e-99
ATP8A2	111.901	-1.1374	0.214579	-5.30064	1.15398e-07	7.64406e-07
ATP8B4	22.2425	1.711	0.461195	3.70994	0.000207309	0.000857612
ATP9A	774.783	-0.395865	0.108038	-3.66411	0.000248197	0.00101067
ATPAF1	1991.15	-0.491305	0.082989	-5.92012	3.21717e-09	2.48747e-08
ATPIF1	1787.25	-0.667164	0.0848337	-7.86437	3.70959e-15	4.60299e-14
ATRAID	1481.52	-0.217104	0.0865627	-2.50806	0.0121397	0.0338497
ATRIP	700.41	0.28062	0.103348	2.71529	0.00662178	0.0198495
ATRN	1595.43	0.336156	0.0867326	3.87578	0.000106285	0.000465134
ATRNL1	314.552	1.82453	0.174384	10.4628	1.28073e-25	2.65883e-24
ATRX	3476.26	0.314748	0.0907187	3.46949	0.000521444	0.00200048
ATXN1	32.1389	1.44957	0.387563	3.74022	0.000183861	0.00076806
ATXN1L	1764.17	0.383744	0.0819917	4.68027	2.86492e-06	1.59729e-05
ATXN7	654.576	0.516732	0.108638	4.75645	1.9703e-06	1.12316e-05
ATXN7L1	906.51	-2.28488	0.119295	-19.1532	9.10027e-82	7.91304e-80
ATXN7L2	427.654	0.641552	0.172973	3.70898	0.000208094	0.000860541
ATXN7L3B	4055.75	0.240911	0.0743743	3.23917	0.00119879	0.00428358
AUH	353.056	-1.02467	0.133694	-7.6643	1.79804e-14	2.12828e-13
AURKAIP1	1666.34	-0.305825	0.101586	-3.0105	0.00260819	0.00860441
AURKC	111.948	-1.46398	0.212392	-6.89282	5.46978e-12	5.41186e-11
AUTS2	2706.16	-0.50247	0.0905093	-5.55159	2.83087e-08	2.00376e-07
AVEN	834.282	0.380125	0.104646	3.6325	0.00028069	0.00113217
AVPR2	17.3365	-1.19471	0.462451	-2.58344	0.00978198	0.0280222
AXIN2	2303.12	3.25416	0.0958238	33.9598	8.73232e-253	6.3684e-250
AZIN1	8608.03	-0.349673	0.10115	-3.45698	0.000546266	0.0020872
AZIN2	66.6499	2.62331	0.298968	8.77457	1.71564e-18	2.56462e-17
B2M	1889.8	0.39062	0.109655	3.56228	0.00036765	0.00145464
B3GALNT2	501.269	0.342269	0.121676	2.81296	0.00490879	0.0151941
B3GALT1	476.648	-1.57661	0.154573	-10.1998	1.98761e-24	3.93139e-23
B3GALT5	524.952	-2.13284	0.154153	-13.8359	1.54754e-43	5.74495e-42
B3GALT5-AS1	165.281	-1.80871	0.184833	-9.78566	1.29751e-22	2.38683e-21
B3GAT2	39.2071	-1.17644	0.333171	-3.53104	0.000413935	0.00161683
B3GAT3	729.465	0.929993	0.108538	8.56839	1.04943e-17	1.49877e-16
B3GLCT	361.609	0.622462	0.151495	4.1088	3.97722e-05	0.000187601
B3GNT3	9.61846	-2.84745	0.646565	-4.40396	1.06292e-05	5.46145e-05
B3GNT5	451.156	1.29756	0.141221	9.18819	3.99524e-20	6.54999e-19
B3GNT7	376.851	-4.65822	0.377325	-12.3454	5.16017e-35	1.47299e-33
B3GNT8	44.9091	1.01994	0.313818	3.25009	0.00115369	0.00413945
B3GNT9	111.176	-0.553372	0.216707	-2.55355	0.0106632	0.0301569
B4GALNT1	162.506	1.41388	0.224417	6.30026	2.97154e-10	2.53991e-09
B4GALNT4	2317.82	-0.310211	0.108039	-2.87128	0.00408813	0.012885
B4GALT2	2186.11	0.30904	0.0898548	3.43932	0.000583174	0.0022181
B9D2	106.974	0.707597	0.227619	3.10869	0.00187918	0.00642146
BAALC	171.363	4.13411	0.560425	7.37673	1.62221e-13	1.80398e-12
BAALC-AS1	17.3538	1.61855	0.495774	3.26469	0.00109582	0.00395188
BAAT	24.4546	2.65772	0.452387	5.87488	4.23138e-09	3.24612e-08
BACE1	916.697	0.877888	0.109031	8.0517	8.1653e-16	1.05426e-14
BACE2	291.186	-0.436199	0.135617	-3.2164	0.00129812	0.00460503
BACH1	1320.68	0.37036	0.0923641	4.00978	6.07751e-05	0.000277745
BACH2	121.767	1.88989	0.219093	8.626	6.35333e-18	9.21925e-17
BAG3	643.33	0.275157	0.109316	2.51708	0.0118333	0.0330813
BAG5	1683.88	-0.272159	0.087934	-3.09504	0.00196789	0.00668965
BAHCC1	1224.77	6.39579	0.190541	33.5665	5.16798e-247	3.54054e-244
BAHD1	1758.63	-0.259901	0.0958007	-2.71294	0.006669	0.0199752
BAIAP2	588.654	0.704673	0.108907	6.47039	9.77526e-11	8.75937e-10
BAIAP2-AS1	520.206	0.550715	0.114859	4.7947	1.6292e-06	9.41537e-06
BAIAP2L1	917.261	-0.730241	0.120439	-6.06317	1.33464e-09	1.07188e-08
BAMBI	399.647	-0.896597	0.379613	-2.36187	0.0181831	0.048153
BANP	557.544	-0.292471	0.114736	-2.54908	0.0108006	0.0305035
BARX2	11.5094	3.84392	0.671936	5.72066	1.06112e-08	7.84747e-08
BASP1	3123.32	0.597524	0.0756289	7.90073	2.77269e-15	3.47093e-14
BASP1P1	4.2877	2.59216	0.712436	3.63845	0.000274289	0.00110873
BATF2	53.5568	-1.73566	0.294383	-5.89593	3.72572e-09	2.87086e-08
BAZ1A	1834.82	0.801862	0.0959185	8.35983	6.28078e-17	8.5865e-16
BAZ1B	6654.53	0.342858	0.0827837	4.14161	3.44876e-05	0.000164527
BAZ2A	5160.72	0.313105	0.0855551	3.65969	0.000252519	0.00102679
BAZ2B	1317.12	-0.356053	0.104909	-3.39391	0.00068903	0.00258635
BBOF1	37.8556	0.870562	0.336815	2.58469	0.00974662	0.0279386
BBS10	624.243	-0.282406	0.114256	-2.4717	0.0134473	0.0370256
BBS2	800.038	0.379429	0.0982035	3.8637	0.000111681	0.000487146
BBS4	1225.6	-0.839025	0.0954442	-8.79074	1.48579e-18	2.23047e-17
BBS5	122.29	1.39111	0.200982	6.92158	4.46644e-12	4.4621e-11
BBS7	864.313	0.566791	0.120553	4.70158	2.58155e-06	1.44751e-05
BCAN	26.166	1.09832	0.398665	2.75499	0.00586935	0.0178424
BCAP29	1023.83	0.494385	0.102577	4.81965	1.43812e-06	8.37967e-06
BCAR1	2763.22	-0.243166	0.0994816	-2.44433	0.0145123	0.0396536
BCAR3	220.085	0.699669	0.178761	3.914	9.07797e-05	0.000402421
BCAS2	1696.76	-0.253615	0.0873486	-2.90348	0.00369044	0.0117429
BCAS4	269.048	-0.661678	0.148035	-4.46975	7.83098e-06	4.09727e-05
BCAT1	10033.8	-0.823867	0.110333	-7.4671	8.19824e-14	9.30918e-13
BCAT2	495.8	-0.479349	0.12121	-3.95468	7.66375e-05	0.000344047
BCDIN3D	105.156	0.910442	0.214815	4.23826	2.25255e-05	0.000110515
BCHE	418.732	0.837219	0.129902	6.44498	1.15615e-10	1.02907e-09
BCKDK	1127.37	-0.364023	0.0919621	-3.9584	7.54539e-05	0.000339003
BCL11A	279.312	-3.6393	0.182481	-19.9434	1.71006e-88	1.67364e-86
BCL11B	68.4312	-1.43361	0.28744	-4.98752	6.11577e-07	3.72984e-06
BCL2	227.168	1.54343	0.160844	9.59582	8.32486e-22	1.47303e-20
BCL2L11	823.983	1.17245	0.10451	11.2186	3.30624e-29	7.8106e-28
BCL2L12	1371.24	-0.24877	0.0940994	-2.6437	0.00820062	0.0239751
BCL2L14	15.9757	-3.78163	0.58751	-6.4367	1.22098e-10	1.08463e-09
BCL3	31.2946	0.992513	0.363493	2.73048	0.00632413	0.0190558
BCL6	94.0046	0.813581	0.249936	3.25516	0.00113328	0.00407268
BCL6B	120.82	-1.6074	0.311184	-5.16544	2.3988e-07	1.53719e-06
BCL7A	1109.43	0.96277	0.0984945	9.77486	1.4435e-22	2.65108e-21
BCL7B	1003.78	0.306908	0.0964654	3.18154	0.00146496	0.00513168
BCL7C	434.556	0.568675	0.123785	4.59405	4.34735e-06	2.35601e-05
BCO1	2.99377	-1.94799	0.716146	-2.7201	0.00652614	0.0196097
BCOR	1975.64	-0.584675	0.098953	-5.90861	3.45008e-09	2.66391e-08
BCORL1	435.46	1.79937	0.1656	10.8658	1.67803e-27	3.72295e-26
BCR	3038.53	-0.792705	0.0923482	-8.58387	9.17353e-18	1.31263e-16
BDH1	206.017	-0.985495	0.202247	-4.87272	1.1007e-06	6.5041e-06
BDKRB2	30.8927	1.86725	0.390726	4.77894	1.76225e-06	1.01428e-05
BDNF	45.6686	-1.02752	0.401946	-2.55638	0.0105769	0.0299577
BDNF-AS	18.1674	1.56043	0.465379	3.35303	0.000799316	0.00296051
BDP1	1692.56	0.374389	0.113742	3.29156	0.000996325	0.00362961
BEND3	1472.22	-0.73936	0.0977279	-7.5655	3.86389e-14	4.46371e-13
BEND4	997.694	-5.36486	0.403221	-13.305	2.16404e-40	7.37927e-39
BEND6	74.9598	1.26999	0.26001	4.88437	1.03757e-06	6.14875e-06
BEND7	247.502	-0.643058	0.147899	-4.34796	1.37408e-05	6.95594e-05
BEST2	3.8412	-1.96392	0.710749	-2.76316	0.0057244	0.0174393
BEST4	19.4966	-1.39272	0.44372	-3.13874	0.00169675	0.00586367
BET1	559.541	-0.438942	0.114705	-3.82669	0.000129876	0.000558644
BEX1	2116.64	-0.559121	0.0912305	-6.12866	8.86208e-10	7.23038e-09
BEX2	938.463	-1.27665	0.103981	-12.2777	1.19317e-34	3.3635e-33
BEX3	6375.33	-0.280788	0.0762186	-3.68398	0.000229623	0.000941819
BEX4	1625.43	-0.208423	0.0871146	-2.39251	0.0167334	0.044834
BFAR	2277.6	-0.286326	0.0765877	-3.73853	0.000185099	0.000772945
BGN	6721.99	3.46954	0.282482	12.2823	1.12711e-34	3.18522e-33
BHLHA15	10.3679	-2.25317	0.58502	-3.85145	0.000117422	0.000509634
BHLHB9	758.72	-0.594641	0.12279	-4.84275	1.28056e-06	7.50216e-06
BHLHE40	205.527	0.767733	0.164775	4.65927	3.17327e-06	1.75321e-05
BICC1	71.4838	3.33525	0.319273	10.4464	1.52253e-25	3.14063e-24
BICD1	655.271	-0.7179	0.107698	-6.66589	2.63063e-11	2.46368e-10
BICD2	1354.78	0.470597	0.0935899	5.02829	4.94865e-07	3.04931e-06
BICDL1	592.841	-2.22979	0.174214	-12.7991	1.6579e-37	5.10651e-36
BICDL2	12.5196	-3.60985	0.62042	-5.8184	5.94143e-09	4.49094e-08
BID	960.245	-0.32179	0.125046	-2.57338	0.0100711	0.0287376
BIN3	389.462	0.39022	0.126988	3.07288	0.00212004	0.00714731
BIRC2	1437.73	0.268912	0.105273	2.55442	0.0106365	0.0300907
BISPR	23.6207	-1.37046	0.406268	-3.37328	0.000742778	0.00276742
BIVM	272.995	0.398897	0.158162	2.52208	0.0116663	0.0326623
BLACAT1	362.102	1.18271	0.151406	7.81152	5.65029e-15	6.94266e-14
BLCAP	1477.88	-0.73033	0.105788	-6.90368	5.06724e-12	5.03562e-11
BLMH	2700.3	0.382363	0.0905042	4.22481	2.39146e-05	0.000116976
BLOC1S5	522.102	0.401124	0.127221	3.15296	0.00161622	0.0056137
BLVRA	277.202	-0.416675	0.171479	-2.42989	0.0151033	0.0410304
BLVRB	124.595	-0.969413	0.204721	-4.73528	2.1875e-06	1.24134e-05
BMF	328.745	-0.500639	0.177713	-2.81711	0.00484572	0.0150174
BMI1	221.469	1.83511	0.167501	10.9558	6.2317e-28	1.40046e-26
BMP1	801.398	2.23315	0.108841	20.5176	1.50071e-93	1.55634e-91
BMP2	339.892	4.52887	0.22488	20.139	3.35944e-90	3.30218e-88
BMP4	348.458	5.24479	0.256655	20.4351	8.14538e-93	8.37049e-91
BMP5	89.141	5.58808	0.470514	11.8765	1.56708e-32	4.13402e-31
BMP6	195.911	3.79016	0.492811	7.6909	1.46098e-14	1.74025e-13
BMP7	571.07	3.54117	0.347332	10.1953	2.08011e-24	4.11076e-23
BMPR1A	2416.26	-0.642129	0.084359	-7.61187	2.70161e-14	3.16794e-13
BMPR1B	87.1418	1.68981	0.238687	7.07961	1.44562e-12	1.49235e-11
BMS1P1	275.066	0.441221	0.150842	2.92505	0.00344397	0.0110316
BMT2	258.44	0.726615	0.176199	4.12385	3.726e-05	0.000176524
BNC1	21.8624	1.60585	0.477192	3.3652	0.000764879	0.00284274
BNC2	264.257	-3.15728	0.174157	-18.1289	1.88539e-73	1.41876e-71
BNIP3	662.741	1.19123	0.153055	7.78302	7.08161e-15	8.61685e-14
BNIP3L	1542.04	0.350306	0.129613	2.70271	0.00687767	0.0205268
BOD1	3071.51	-0.209515	0.0773505	-2.70864	0.00675594	0.0202088
BOK	1079.09	-0.78356	0.113704	-6.89125	5.53051e-12	5.46476e-11
BORCS7	240.259	1.15513	0.153881	7.50668	6.06466e-14	6.9419e-13
BPGM	447.374	-0.317789	0.122909	-2.58557	0.0097218	0.0278778
BPHL	476.119	0.30926	0.117385	2.63458	0.00842407	0.0245395
BPNT1	414.01	0.474601	0.123446	3.84461	0.000120743	0.000522941
BPTF	5590.45	-0.550743	0.0832159	-6.61824	3.63489e-11	3.37346e-10
BRAF	752.45	0.254295	0.10778	2.35939	0.0183049	0.048424
BRCA1	2221.76	0.348926	0.0946206	3.68764	0.000226346	0.000930066
BRCA2	857.117	0.293088	0.12174	2.40749	0.0160625	0.0432567
BRD1	1688.96	0.344682	0.0870557	3.95933	7.51595e-05	0.000337882
BRD2	7640.95	0.385288	0.071737	5.37084	7.83706e-08	5.29212e-07
BRD3	1628.08	-0.396709	0.0830016	-4.77953	1.75707e-06	1.01181e-05
BRD4	2932.46	-0.258672	0.0865788	-2.9877	0.00281081	0.00920702
BRD7	4336.99	0.242053	0.0761081	3.18039	0.00147078	0.0051496
BRD8	2883.93	0.239271	0.0743518	3.2181	0.00129044	0.00457972
BRD9	2093.84	0.263566	0.0907422	2.90456	0.00367775	0.0117091
BRF1	681.833	0.460663	0.124182	3.70959	0.000207593	0.000858629
BRI3BP	476.817	0.632727	0.1196	5.29037	1.22068e-07	8.05753e-07
BRICD5	202.642	0.68319	0.172824	3.95309	7.71473e-05	0.000345992
BRINP1	341.979	-4.30675	0.196449	-21.9229	1.57025e-106	2.04025e-104
BRINP3	55.6526	2.65652	0.369349	7.19242	6.3652e-13	6.79756e-12
BRIP1	1543.44	0.351809	0.108948	3.22915	0.0012416	0.00442119
BRIX1	1763.78	-0.337353	0.102301	-3.29765	0.000974985	0.00355868
BRMS1L	466.846	0.500507	0.135737	3.68734	0.000226614	0.000930998
BRPF1	1269.37	0.375445	0.100586	3.73258	0.000189526	0.000789534
BRPF3	2364.98	0.393973	0.0800641	4.92072	8.62267e-07	5.14897e-06
BRSK2	291.437	-2.15703	0.1655	-13.0334	7.89857e-39	2.5805e-37
BSG	16558.7	0.355664	0.088193	4.03279	5.5118e-05	0.000254152
BSN	158.01	0.583422	0.21673	2.69193	0.00710396	0.0211241
BSND	8.39936	-3.06436	0.654784	-4.67996	2.86935e-06	1.59937e-05
BSPRY	10.1878	-3.90655	0.670036	-5.83036	5.53065e-09	4.19587e-08
BST2	612.69	-2.57524	0.122964	-20.943	2.17139e-97	2.44233e-95
BTAF1	2871.27	0.262445	0.0854026	3.07303	0.00211894	0.00714467
BTBD1	1963.12	0.440226	0.109252	4.02947	5.59022e-05	0.000257401
BTBD11	138.907	-1.29183	0.286384	-4.51083	6.45757e-06	3.41344e-05
BTBD17	715.407	-2.38503	0.165108	-14.4452	2.68582e-47	1.10603e-45
BTBD19	51.4097	0.89773	0.304687	2.9464	0.00321496	0.0103656
BTBD3	2503.92	-0.3635	0.0805177	-4.51453	6.3457e-06	3.35744e-05
BTF3	12533	-0.299466	0.0750136	-3.99216	6.54751e-05	0.00029766
BTF3L4	2669.61	-0.405158	0.0846791	-4.78463	1.71303e-06	9.87967e-06
BTG2	800.648	3.02995	0.117928	25.6932	1.39421e-145	3.28338e-143
BTG3	634.081	0.412772	0.118792	3.47475	0.000511327	0.00196466
BTN3A1	104.773	-1.02891	0.230348	-4.46677	7.94094e-06	4.15e-05
BUB1B	4304.04	-0.314116	0.0844738	-3.71851	0.000200402	0.000831167
BUB3	6873.63	-0.802477	0.0806457	-9.95065	2.50536e-23	4.73589e-22
BVES	141.872	1.70658	0.244917	6.968	3.21488e-12	3.2375e-11
C10orf10	31.4021	3.62652	0.475286	7.63018	2.3442e-14	2.75743e-13
C10orf105	55.4977	-0.747277	0.283325	-2.63752	0.00835139	0.0243493
C10orf11	25.1513	3.12397	0.510782	6.11606	9.59177e-10	7.80039e-09
C10orf142	4.95964	-2.85976	0.708527	-4.03621	5.43215e-05	0.000250735
C10orf2	1205.7	-0.372093	0.0955944	-3.89242	9.92495e-05	0.000436628
C10orf25	24.0284	-1.06897	0.426736	-2.505	0.0122452	0.0340863
C10orf71	9.6806	2.80242	0.634983	4.41338	1.01769e-05	5.2386e-05
C10orf82	92.2716	-2.57987	0.25588	-10.0823	6.61316e-24	1.28115e-22
C11orf31	996.816	-0.398907	0.115895	-3.44196	0.000577521	0.00219956
C11orf45	6.57087	2.24264	0.668315	3.35567	0.000791727	0.00293528
C11orf49	800.193	0.602797	0.100648	5.98914	2.10953e-09	1.65944e-08
C11orf63	27.6592	2.2694	0.418025	5.42886	5.67165e-08	3.88678e-07
C11orf86	3.55545	-2.4	0.716378	-3.35019	0.000807554	0.00298808
C11orf87	426.799	5.25978	0.487563	10.7879	3.92619e-27	8.59277e-26
C11orf95	1611.49	0.220035	0.0906627	2.42696	0.0152259	0.0413387
C12orf4	654.416	0.347727	0.115101	3.02105	0.00251899	0.00835155
C12orf43	940.782	-0.413831	0.100385	-4.12245	3.74858e-05	0.00017752
C14orf132	1254.8	-0.334105	0.0885863	-3.77152	0.000162259	0.000685672
C14orf166	5314.7	-0.487193	0.0866923	-5.61979	1.91184e-08	1.37521e-07
C14orf169	631.028	-0.410185	0.103855	-3.9496	7.82826e-05	0.000350736
C14orf79	268.052	0.928717	0.147274	6.30604	2.86259e-10	2.45327e-09
C15orf39	1270.12	-1.64207	0.0994468	-16.512	3.00561e-61	1.69877e-59
C15orf40	474.437	0.295762	0.119533	2.47431	0.0133494	0.0367874
C15orf56	3.2175	-1.79246	0.713414	-2.51252	0.0119873	0.0334785
C15orf59-AS1	134.456	-0.710606	0.215274	-3.30094	0.000963628	0.00352007
C15orf61	38.3382	0.924717	0.325256	2.84305	0.00446842	0.0139649
C16orf13	714.826	-1.01427	0.121341	-8.35886	6.33293e-17	8.6406e-16
C16orf45	960.268	0.613272	0.0969187	6.32769	2.48854e-10	2.15064e-09
C16orf46	42.6783	0.817403	0.322641	2.53348	0.0112936	0.0317215
C16orf54	46.38	-1.90782	0.367344	-5.19356	2.0631e-07	1.33113e-06
C16orf58	667.309	0.32767	0.118071	2.77518	0.00551704	0.0168895
C16orf62	1484.34	0.355725	0.0849266	4.18862	2.80661e-05	0.000135726
C16orf89	106.129	-1.89397	0.223831	-8.46159	2.63755e-17	3.68084e-16
C16orf92	21.6068	-1.43561	0.421988	-3.40202	0.000668902	0.00251874
C17orf51	170.875	0.709302	0.182001	3.89724	9.72963e-05	0.000428619
C17orf58	413.161	-0.581765	0.123813	-4.69875	2.61753e-06	1.46623e-05
C17orf62	1532.44	0.266189	0.105602	2.52068	0.0117128	0.0327728
C17orf75	966.599	-0.314092	0.105167	-2.9866	0.00282096	0.00923625
C17orf89	550.931	-0.45565	0.118012	-3.86105	0.000112903	0.000492001
C17orf96	1305.56	2.89707	0.16326	17.7452	1.87832e-70	1.31879e-68
C18orf54	1125.17	0.462822	0.146046	3.16903	0.00152951	0.0053404
C18orf65	14.7944	2.11427	0.529011	3.99664	6.42475e-05	0.000292726
C18orf8	288.773	0.323994	0.137187	2.36169	0.0181917	0.0481589
C19orf12	556.939	0.402034	0.11773	3.41487	0.000638115	0.00241044
C19orf43	2111.49	0.30636	0.0899225	3.40694	0.000656966	0.00247751
C19orf60	785.174	-0.363852	0.123615	-2.94342	0.00324611	0.0104556
C19orf66	81.2054	-3.7727	0.312975	-12.0543	1.84036e-33	5.00083e-32
C19orf68	436.305	-0.378891	0.141046	-2.68629	0.00722497	0.0214303
C19orf84	35.4083	-2.67436	0.378223	-7.07084	1.53997e-12	1.58758e-11
C1GALT1	1468.7	-1.57087	0.103866	-15.124	1.12578e-51	5.14175e-50
C1GALT1C1	453.205	-0.34811	0.126534	-2.75112	0.00593918	0.0180232
C1QBP	6915.03	-0.558609	0.0728996	-7.66271	1.82047e-14	2.15258e-13
C1QL2	12.9149	-3.61587	0.6183	-5.84808	4.97274e-09	3.78531e-08
C1QL3	13.097	1.40795	0.54171	2.59908	0.00934742	0.0269446
C1QL4	8.96045	2.00108	0.599434	3.33828	0.000842991	0.00310649
C1QTNF6	357.939	0.907741	0.16135	5.6259	1.84541e-08	1.32912e-07
C1R	127.351	-2.21139	0.214711	-10.2994	7.09139e-25	1.4289e-23
C1RL-AS1	199.022	0.572986	0.181402	3.15866	0.00158498	0.00551704
C1S	539.303	-1.97029	0.404999	-4.86493	1.14497e-06	6.75335e-06
C1orf105	2.25503	1.79064	0.711346	2.51726	0.0118272	0.0330681
C1orf115	143.239	-2.2243	0.233221	-9.53731	1.46587e-21	2.56902e-20
C1orf116	32.4006	-2.11171	0.374213	-5.64307	1.67045e-08	1.20888e-07
C1orf123	1089.23	0.374657	0.0973854	3.84716	0.000119497	0.000517743
C1orf158	10.5158	3.38755	0.695617	4.86986	1.1168e-06	6.59405e-06
C1orf159	351.864	0.4132	0.163705	2.52405	0.0116011	0.0325125
C1orf168	3.47529	1.66353	0.708838	2.34685	0.0189331	0.0498648
C1orf194	13.2477	3.42164	0.671481	5.09567	3.47508e-07	2.18599e-06
C1orf198	1696.5	0.39712	0.0825928	4.80816	1.52323e-06	8.84139e-06
C1orf210	3.72188	-2.48289	0.715539	-3.46996	0.000520535	0.00199767
C1orf226	1020.43	-0.474227	0.135219	-3.50711	0.000453008	0.00175641
C1orf228	7.81355	1.93678	0.620518	3.12124	0.00180094	0.00618498
C1orf43	4863.25	0.346056	0.0711955	4.86064	1.17004e-06	6.8922e-06
C1orf53	26.2073	2.40444	0.451252	5.32837	9.90956e-08	6.61262e-07
C1orf54	440.797	0.359523	0.122734	2.92928	0.00339746	0.0108981
C1orf64	24.8221	4.26073	0.59638	7.14433	9.0439e-13	9.51883e-12
C1orf94	229.156	-0.834391	0.183961	-4.5357	5.74127e-06	3.05552e-05
C20orf166-AS1	9.88146	1.61115	0.564683	2.85319	0.00432827	0.0135606
C20orf194	494.048	0.559303	0.119974	4.66188	3.13335e-06	1.73454e-05
C21orf2	166.745	0.544014	0.222723	2.44256	0.0145835	0.0398049
C21orf59	460.996	-0.754067	0.127961	-5.89294	3.79395e-09	2.92145e-08
C22orf15	131.846	-1.252	0.203329	-6.15751	7.38997e-10	6.07757e-09
C22orf23	12.6179	1.3057	0.52301	2.49652	0.012542	0.0348213
C22orf24	11.3134	1.46546	0.546389	2.68208	0.00731662	0.0216709
C22orf29	850.382	0.257144	0.0988429	2.60154	0.00928055	0.0267655
C22orf39	636.534	0.489917	0.11176	4.38364	1.16711e-05	5.9697e-05
C2CD2	435.446	-1.24745	0.129025	-9.66823	4.11413e-22	7.36439e-21
C2CD2L	166.745	1.27871	0.179272	7.13281	9.83435e-13	1.0279e-11
C2orf15	40.9274	-2.07488	0.340264	-6.09786	1.075e-09	8.70785e-09
C2orf40	49.8378	1.26538	0.318792	3.96931	7.20814e-05	0.000324948
C2orf47	516.281	-0.475079	0.120637	-3.9381	8.2131e-05	0.000366743
C2orf68	656.406	-0.377617	0.116317	-3.24644	0.00116859	0.00418824
C2orf69	918.775	-0.314752	0.110023	-2.86079	0.00422585	0.0132765
C2orf72	44.4838	1.11258	0.312386	3.56156	0.000368654	0.0014581
C2orf80	13.0007	-1.95731	0.533405	-3.66946	0.000243068	0.000991391
C2orf81	71.4442	0.753237	0.275342	2.73565	0.00622578	0.0187845
C2orf82	18.4854	-1.08336	0.445717	-2.43059	0.0150742	0.0409612
C2orf88	29.0697	1.02535	0.383496	2.67369	0.00750212	0.0221652
C3	26.5083	-2.86912	0.446212	-6.42995	1.27645e-10	1.13213e-09
C3orf52	1920.21	3.13133	0.140426	22.2988	3.7951e-110	5.16865e-108
C3orf70	173.245	-0.671302	0.179316	-3.74369	0.000181338	0.0007585
C3orf80	10.7563	1.59083	0.561315	2.83412	0.00459524	0.0143256
C4orf19	40.949	1.09523	0.33471	3.27218	0.00106723	0.00385799
C4orf32	221.016	-0.483679	0.168102	-2.87729	0.00401106	0.0126562
C4orf47	35.0057	1.01059	0.352106	2.87013	0.00410302	0.0129302
C4orf48	156.507	0.929836	0.199223	4.66732	3.05157e-06	1.693e-05
C5	137.546	0.893911	0.192378	4.64664	3.37381e-06	1.85584e-05
C5AR2	5.87338	-1.8136	0.659775	-2.74882	0.00598108	0.0181309
C5orf15	2187.21	0.411861	0.0996094	4.13476	3.5533e-05	0.000169194
C5orf24	1298.55	0.384881	0.103593	3.71531	0.000202955	0.000841446
C5orf30	596.691	-0.387081	0.128393	-3.01481	0.00257141	0.00849795
C5orf38	65.584	-1.83566	0.32477	-5.6522	1.58406e-08	1.15116e-07
C5orf42	754.687	1.35961	0.139179	9.76879	1.5327e-22	2.81032e-21
C5orf49	36.2608	2.31629	0.448785	5.16124	2.45324e-07	1.56941e-06
C5orf58	6.61947	-1.75286	0.636052	-2.75585	0.005854	0.017803
C6orf1	75.3166	1.18175	0.250488	4.71779	2.38418e-06	1.34384e-05
C6orf106	2837.7	-0.203167	0.0766547	-2.65042	0.00803927	0.0235644
C6orf118	74.657	2.32944	0.323259	7.20611	5.75711e-13	6.16273e-12
C6orf120	1208.98	-0.366534	0.0969867	-3.77922	0.000157319	0.000666919
C6orf132	339.09	-3.87429	0.169666	-22.8348	2.06801e-115	3.09627e-113
C6orf136	255.272	-0.414062	0.164178	-2.52204	0.0116678	0.0326623
C6orf141	51.5947	-2.29918	0.320511	-7.17347	7.31191e-13	7.76821e-12
C6orf25	22.2886	2.41876	0.462444	5.23038	1.69159e-07	1.1018e-06
C6orf48	1569.34	0.240444	0.0965864	2.48942	0.0127952	0.0354067
C6orf52	25.3962	1.32461	0.404938	3.27114	0.00107116	0.00387096
C6orf62	3351.36	-0.235325	0.0762746	-3.08523	0.00203393	0.00688679
C6orf89	934.132	0.385185	0.100261	3.84184	0.000122117	0.000528284
C6orf99	8.82315	-1.93235	0.591408	-3.26737	0.00108551	0.00392033
C7	271.642	7.98094	0.522902	15.2628	1.3538e-52	6.33678e-51
C7orf50	1123.1	0.350536	0.117422	2.98527	0.00283324	0.00927242
C7orf57	13.8817	3.18632	0.627384	5.07874	3.79942e-07	2.37745e-06
C8orf31	60.7375	1.38051	0.281519	4.9038	9.39993e-07	5.58365e-06
C8orf48	57.2979	1.43932	0.297455	4.83877	1.30645e-06	7.64398e-06
C8orf58	587.679	-0.689553	0.124708	-5.52934	3.21436e-08	2.26246e-07
C8orf88	68.8542	-0.728039	0.262075	-2.77798	0.00546983	0.0167632
C9orf135	43.8828	-3.61901	0.42368	-8.54184	1.32102e-17	1.87715e-16
C9orf24	27.7812	2.83684	0.532023	5.33218	9.70423e-08	6.48133e-07
C9orf3	389.353	0.811015	0.130244	6.22687	4.75836e-10	3.97257e-09
C9orf47	37.6624	1.36481	0.403876	3.37928	0.000726761	0.00271222
C9orf91	407.44	-1.12908	0.152459	-7.40584	1.30326e-13	1.45862e-12
CA10	13.1175	3.28744	0.605011	5.43369	5.52014e-08	3.78983e-07
CA11	2449.69	-1.34475	0.125324	-10.7301	7.3493e-27	1.59303e-25
CA12	85.8012	-0.765407	0.234404	-3.26533	0.00109337	0.0039443
CA4	174.085	5.00854	0.315856	15.857	1.25714e-56	6.4594e-55
CA7	15.0339	-3.18039	0.561338	-5.66573	1.46398e-08	1.0687e-07
CA8	49.671	1.19382	0.294371	4.05548	5.00306e-05	0.000232067
CA9	14.7428	-1.1688	0.487064	-2.39969	0.0164089	0.0440585
CAAP1	957.523	-0.44428	0.101087	-4.39501	1.10768e-05	5.68244e-05
CAB39	1872.94	-0.333823	0.106502	-3.13444	0.00172184	0.00593767
CAB39L	269.149	0.497945	0.147198	3.38282	0.000717456	0.00268281
CABIN1	2489.59	0.245184	0.0899236	2.72657	0.00639955	0.0192574
CABLES1	769.223	0.713075	0.119253	5.97954	2.23773e-09	1.7554e-08
CACHD1	6540.93	1.15898	0.0902077	12.8479	8.84097e-38	2.76455e-36
CACNA1A	545.996	-0.578713	0.146587	-3.94791	7.88376e-05	0.00035296
CACNA1B	309.635	-1.41195	0.169545	-8.32792	8.22757e-17	1.11316e-15
CACNA1E	126.039	1.51216	0.520378	2.90589	0.00366205	0.0116641
CACNA1G	499.45	0.675773	0.164206	4.11539	3.86518e-05	0.000182735
CACNA1I	92.7982	2.50774	0.340757	7.35932	1.84843e-13	2.0495e-12
CACNA1S	65.4305	-1.29799	0.271483	-4.78109	1.74345e-06	1.00448e-05
CACNA2D2	603.617	-1.52551	0.184718	-8.25859	1.47404e-16	1.97892e-15
CACNA2D3	25.8519	-2.82387	0.448092	-6.30199	2.93846e-10	2.51544e-09
CACNB3	540.689	1.44841	0.126539	11.4464	2.45211e-30	5.96741e-29
CACNG4	267.344	3.2517	0.419416	7.75293	8.97993e-15	1.08566e-13
CACNG5	12.0515	-1.66739	0.56331	-2.95998	0.00307661	0.00996363
CACNG7	2098.88	-0.270541	0.100598	-2.68932	0.00715974	0.0212648
CACNG8	1282.34	-1.01522	0.12956	-7.83591	4.65464e-15	5.75038e-14
CACYBP	6846.91	-0.340612	0.0866951	-3.92885	8.53545e-05	0.000380011
CAD	6635.96	-0.477882	0.0868923	-5.49971	3.80418e-08	2.65693e-07
CADM1	1496.65	1.73058	0.0939543	18.4193	9.19195e-76	7.19071e-74
CADM2	357.028	-1.85172	0.170635	-10.8519	1.95284e-27	4.31995e-26
CADM3	186.703	-0.392337	0.16257	-2.41334	0.0158069	0.0426906
CADPS2	253.632	-2.38745	0.15818	-15.0932	1.79481e-51	8.14802e-50
CALB1	378.807	-6.49366	0.287372	-22.5967	4.66699e-113	6.63593e-111
CALCRL	72.9582	-1.68152	0.258091	-6.51524	7.25758e-11	6.5737e-10
CALHM1	12.5075	-2.79563	0.577999	-4.83674	1.31988e-06	7.71651e-06
CALM2	14922.1	-0.456659	0.0793849	-5.75246	8.79526e-09	6.55815e-08
CALM3	10860.2	0.423593	0.072767	5.82122	5.84203e-09	4.42023e-08
CALN1	185.724	-3.52864	0.231895	-15.2166	2.74569e-52	1.27202e-50
CAMK2A	38.1122	2.91537	0.406712	7.16813	7.60288e-13	8.06597e-12
CAMK2G	1187.34	-0.247406	0.0996596	-2.48251	0.0130461	0.0360173
CAMK2N2	56.9164	-0.894736	0.289845	-3.08694	0.00202228	0.0068549
CAMK4	205.998	-0.502211	0.155617	-3.22723	0.00124993	0.00444806
CAMKK1	137.514	-1.87733	0.201055	-9.3374	9.87251e-21	1.66939e-19
CAMKK2	1516.74	0.38854	0.087443	4.44336	8.85668e-06	4.59222e-05
CAMKMT	182.629	-0.808815	0.174785	-4.62748	3.70146e-06	2.02523e-05
CAMKV	2961.1	-0.83208	0.0825997	-10.0736	7.22537e-24	1.39497e-22
CAMSAP1	2626.68	0.543939	0.0799156	6.80642	1.00054e-11	9.6709e-11
CAMSAP3	488.155	-2.06072	0.133713	-15.4116	1.36884e-53	6.58442e-52
CAND2	327.877	-0.377677	0.135482	-2.78765	0.00530919	0.0163173
CANT1	1625.21	0.646663	0.0954312	6.77623	1.23354e-11	1.18169e-10
CAP2P1	4.41458	-2.26538	0.707319	-3.20277	0.00136113	0.0048067
CAPG	333.579	-0.836123	0.168992	-4.94771	7.50925e-07	4.52115e-06
CAPN11	138.948	-1.25664	0.286603	-4.38462	1.16189e-05	5.94824e-05
CAPN12	28.7258	-1.16351	0.373451	-3.11557	0.00183589	0.00628877
CAPN13	73.4028	-3.93967	0.368085	-10.7031	9.83896e-27	2.11645e-25
CAPN2	2554.27	0.2536	0.0842341	3.01065	0.00260688	0.00860132
CAPN6	274.744	-1.81971	0.163251	-11.1467	7.43001e-29	1.72285e-27
CAPN7	960.962	0.473335	0.0962325	4.91866	8.71387e-07	5.19797e-06
CAPRIN2	2843.32	-1.6105	0.0789343	-20.4031	1.5695e-92	1.59834e-90
CAPS2	29.5047	1.45588	0.382666	3.80457	0.000142051	0.000606744
CAPZA2	2434.54	-0.4431	0.101324	-4.37309	1.22502e-05	6.24611e-05
CAPZB	5933.35	-0.28194	0.0746977	-3.77441	0.000160389	0.000678657
CARD11	830.57	-2.17759	0.328975	-6.61933	3.60841e-11	3.35164e-10
CARD8	871.833	0.266931	0.104057	2.56523	0.0103106	0.0293321
CARHSP1	1592.68	-0.41913	0.0871214	-4.81088	1.50268e-06	8.73146e-06
CARMIL2	344.139	-2.80563	0.199537	-14.0607	6.62439e-45	2.57327e-43
CARMIL3	253.124	-1.06451	0.162602	-6.54674	5.88077e-11	5.36748e-10
CARMN	38.0475	2.8972	0.407932	7.10217	1.22817e-12	1.27369e-11
CARNMT1	738.461	-0.625527	0.126167	-4.95794	7.12431e-07	4.29969e-06
CARS	1642.52	-0.272106	0.0827698	-3.2875	0.0010108	0.0036734
CASC10	539.954	-1.05048	0.138347	-7.5931	3.12339e-14	3.63988e-13
CASC3	4487.24	-0.248317	0.0705419	-3.52013	0.00043133	0.00167956
CASC5	1479.45	0.635274	0.121792	5.21604	1.82789e-07	1.18546e-06
CASD1	1538.86	0.230754	0.0951356	2.42552	0.0152863	0.0414926
CASK	2434.89	0.856398	0.113795	7.5258	5.24002e-14	6.01657e-13
CASKIN2	777.729	-0.543442	0.133371	-4.07468	4.60779e-05	0.000215144
CASP10	43.374	-2.36587	0.35402	-6.68289	2.34282e-11	2.1996e-10
CASP2	1828.76	0.275374	0.0862663	3.19214	0.00141223	0.00496156
CASP3	1876.59	-0.651661	0.0909325	-7.16643	7.698e-13	8.16306e-12
CASP4	2.70599	-2.08471	0.716011	-2.91156	0.00359625	0.0114691
CASP7	395.378	1.75402	0.151829	11.5527	7.15738e-31	1.78013e-29
CASP8	179.244	-0.482282	0.197977	-2.43604	0.0148489	0.0404316
CASQ1	68.48	1.28496	0.286436	4.48603	7.25626e-06	3.81068e-05
CAST	914.842	-0.569476	0.106915	-5.32645	1.00149e-07	6.67502e-07
CAV1	114.928	-2.02976	0.311138	-6.52366	6.86134e-11	6.22727e-10
CBFB	1746.7	0.619171	0.106866	5.79392	6.87636e-09	5.16652e-08
CBL	2622.1	-0.397147	0.08736	-4.54609	5.46514e-06	2.91749e-05
CBLB	823.116	-0.236166	0.0961763	-2.45555	0.0140669	0.0385858
CBLC	61.7051	-4.01866	0.380668	-10.5569	4.72192e-26	9.95833e-25
CBLN1	56.8774	-0.765931	0.30824	-2.48485	0.0129604	0.0358115
CBLN2	5.56757	2.70392	0.71193	3.79801	0.000145863	0.000621852
CBR1	605.285	-1.67894	0.113612	-14.7778	2.03601e-49	8.71783e-48
CBR4	724.203	-0.305208	0.121787	-2.50608	0.0122077	0.0340016
CBS	1235.44	-0.82613	0.104569	-7.9003	2.78243e-15	3.48119e-14
CBSL	46.0469	-0.725763	0.297976	-2.43564	0.0148653	0.0404705
CBX1	8901.22	0.334295	0.0837605	3.99109	6.57715e-05	0.000298767
CBX2	4996.93	0.446435	0.0971129	4.59707	4.28467e-06	2.32408e-05
CBX3	8179.99	-0.238531	0.0819008	-2.91243	0.00358627	0.0114421
CBX4	148.878	1.93348	0.214502	9.0138	1.9904e-19	3.15119e-18
CBX5	10186	0.475841	0.0991523	4.79909	1.59387e-06	9.23005e-06
CBX6	1482.91	-0.259636	0.105087	-2.47067	0.013486	0.0371231
CBX7	50.5013	-1.97002	0.312883	-6.29637	3.047e-10	2.60048e-09
CBX8	154.015	3.09203	0.243641	12.6909	6.63895e-37	2.00124e-35
CC2D1A	616.242	-0.938492	0.114696	-8.18243	2.78181e-16	3.68646e-15
CC2D2A	710.102	0.276107	0.115666	2.38711	0.0169815	0.0454389
CCAR1	6679.02	-0.175616	0.069958	-2.51031	0.0120625	0.0336801
CCBE1	179.883	-1.8053	0.256595	-7.03559	1.98413e-12	2.02791e-11
CCDC102A	281.686	0.748081	0.167488	4.46647	7.95212e-06	4.15392e-05
CCDC110	6.84588	-2.47609	0.660619	-3.74814	0.000178153	0.000746559
CCDC112	504.51	-0.89775	0.143257	-6.26669	3.68804e-10	3.11465e-09
CCDC115	566.839	-0.447611	0.126003	-3.55237	0.000381773	0.00150499
CCDC136	809.359	-0.66908	0.137998	-4.84848	1.24408e-06	7.30288e-06
CCDC138	1479.83	0.477205	0.119533	3.99223	6.54541e-05	0.000297624
CCDC14	4199.31	0.329915	0.0888495	3.71319	0.000204664	0.000847445
CCDC140	4.02945	1.82888	0.704465	2.59612	0.00942832	0.0271432
CCDC148	36.9028	1.24632	0.356121	3.4997	0.000465779	0.00180345
CCDC149	167.984	-0.500189	0.181353	-2.75809	0.00581406	0.0176862
CCDC160	246.155	0.678665	0.158767	4.27459	1.9149e-05	9.4862e-05
CCDC167	273.941	1.54924	0.16542	9.36549	7.5695e-21	1.28767e-19
CCDC169	36.9447	1.27266	0.368891	3.44997	0.000560647	0.00213854
CCDC170	9.71947	2.46024	0.648267	3.7951	0.000147584	0.000628357
CCDC171	190.383	0.83576	0.171326	4.87819	1.07062e-06	6.33459e-06
CCDC172	17.4305	-4.6688	0.636248	-7.33801	2.16789e-13	2.3792e-12
CCDC173	34.6635	0.831396	0.351434	2.36572	0.017995	0.0477502
CCDC177	162.817	-1.14182	0.187127	-6.10187	1.04836e-09	8.50426e-09
CCDC183-AS1	43.1381	0.873687	0.311499	2.80479	0.00503501	0.0155507
CCDC184	81.4138	1.41734	0.25828	5.48761	4.07399e-08	2.84011e-07
CCDC191	74.4063	0.911881	0.245051	3.7212	0.000198282	0.000822827
CCDC22	455.052	0.404016	0.126373	3.197	0.00138866	0.00489167
CCDC24	216.061	-0.696188	0.158669	-4.38768	1.14567e-05	5.87067e-05
CCDC28A	199.456	-0.493354	0.162194	-3.04176	0.002352	0.00785902
CCDC3	35.8667	1.67736	0.37685	4.451	8.54731e-06	4.44326e-05
CCDC30	85.5688	0.736408	0.238722	3.08479	0.00203694	0.00689491
CCDC33	148.344	1.76098	0.201917	8.72133	2.74954e-18	4.07084e-17
CCDC43	783.658	-0.333797	0.110694	-3.0155	0.00256559	0.00848243
CCDC50	1349.84	0.421054	0.0973527	4.32503	1.52511e-05	7.67408e-05
CCDC57	462.59	1.60845	0.138307	11.6296	2.9139e-31	7.35239e-30
CCDC58	885.852	-0.389309	0.0996645	-3.9062	9.37589e-05	0.000414652
CCDC59	812.6	-0.273462	0.112825	-2.42377	0.0153604	0.0416638
CCDC6	2550.19	-0.923325	0.0983348	-9.38961	6.02254e-21	1.02994e-19
CCDC60	14.867	1.24127	0.49417	2.51182	0.0120109	0.0335403
CCDC63	14.9014	-2.31516	0.536668	-4.31396	1.60354e-05	8.04012e-05
CCDC66	856.761	-0.320605	0.110547	-2.90017	0.00372956	0.0118557
CCDC69	188.708	-1.43744	0.241831	-5.94396	2.78217e-09	2.16223e-08
CCDC71L	565.713	0.328652	0.11761	2.79443	0.00519919	0.0160141
CCDC74A	413.109	0.66514	0.127019	5.23655	1.63605e-07	1.06716e-06
CCDC74B	304.536	0.840401	0.140267	5.99144	2.07985e-09	1.63837e-08
CCDC77	1567.5	-0.219365	0.0886323	-2.475	0.0133235	0.0367259
CCDC78	103.416	0.997279	0.25963	3.84116	0.000122453	0.000529437
CCDC80	872.415	1.9787	0.117435	16.8493	1.06197e-63	6.29564e-62
CCDC82	876.272	0.25786	0.104255	2.47337	0.0133846	0.0368754
CCDC85A	66.1974	5.4997	0.51308	10.719	8.28962e-27	1.78828e-25
CCDC85B	513.79	-0.706074	0.136222	-5.18326	2.18039e-07	1.40399e-06
CCDC85C	884.918	0.969779	0.10681	9.07952	1.09058e-19	1.75737e-18
CCDC88B	221.512	-2.05521	0.183997	-11.1698	5.73118e-29	1.3344e-27
CCDC91	361.915	-0.575932	0.149648	-3.84857	0.000118809	0.000515058
CCDC92	172.859	1.65768	0.187155	8.85727	8.20001e-19	1.25685e-17
CCDC92B	11.0883	-1.53325	0.541718	-2.83034	0.00464981	0.0144758
CCDC97	1251.66	0.225455	0.095618	2.35788	0.0183798	0.048582
CCKBR	102.089	-3.00753	0.267557	-11.2407	2.57329e-29	6.11103e-28
CCL2	99.0477	1.029	0.224181	4.59006	4.43111e-06	2.39776e-05
CCL26	11.5818	2.08436	0.570083	3.65625	0.000255931	0.00103917
CCM2	861.094	0.301167	0.106233	2.83496	0.00458316	0.0142938
CCNA1	3.50206	1.92066	0.714228	2.68914	0.00716358	0.0212734
CCNB1	7911.51	0.214674	0.0777532	2.76096	0.00576312	0.0175526
CCNC	1911.45	-0.539202	0.113636	-4.74499	2.0852e-06	1.18597e-05
CCND1	5343.95	-0.352522	0.0738198	-4.77544	1.79311e-06	1.03047e-05
CCND2	2580.29	0.557936	0.0794032	7.02662	2.116e-12	2.15878e-11
CCND3	791.849	0.632751	0.109209	5.79396	6.87467e-09	5.16652e-08
CCNDBP1	519.756	0.332022	0.11293	2.94007	0.00328141	0.0105588
CCNE1	1378.25	-0.8168	0.0863538	-9.45876	3.11625e-21	5.38214e-20
CCNE2	233.722	0.99068	0.150805	6.56928	5.05605e-11	4.64474e-10
CCNF	1916.86	0.261658	0.0802004	3.26255	0.00110414	0.00397933
CCNG2	566.062	0.751395	0.123514	6.0835	1.17586e-09	9.49087e-09
CCNJ	2189.08	0.538375	0.085278	6.31317	2.73372e-10	2.35085e-09
CCNJL	1363.29	-0.619599	0.104937	-5.90447	3.53781e-09	2.73072e-08
CCNL2	6037.24	0.34281	0.0719831	4.76237	1.91336e-06	1.09263e-05
CCNT1	1775.97	0.287713	0.0994464	2.89315	0.00381398	0.0120918
CCNYL1	931.213	-0.760802	0.101498	-7.49572	6.59375e-14	7.53267e-13
CCP110	1262.39	0.489491	0.129497	3.77995	0.000156861	0.0006651
CCSAP	265.108	1.09327	0.183048	5.9726	2.33502e-09	1.83045e-08
CCSER2	735.39	0.48508	0.115322	4.2063	2.59589e-05	0.000125967
CCT6A	13556.7	-0.226498	0.0847844	-2.67146	0.00755223	0.0222899
CCZ1	254.902	-0.539471	0.149049	-3.61941	0.000295275	0.00118677
CCZ1B	261.011	-0.590069	0.150286	-3.92631	8.62579e-05	0.000383731
CD109	148.063	-0.711567	0.215754	-3.29806	0.000973569	0.00355409
CD151	773.937	1.74578	0.106492	16.3936	2.12464e-60	1.1831e-58
CD164L2	15.0181	-1.49709	0.503574	-2.97292	0.00294979	0.00960658
CD177	7.35086	-2.80093	0.660523	-4.24047	2.23055e-05	0.000109531
CD177P1	3.18932	-2.2504	0.716872	-3.13919	0.00169414	0.00585554
CD19	4.98218	-1.62925	0.682721	-2.3864	0.0170141	0.0454944
CD1C	4.48985	-2.77073	0.710198	-3.90135	9.56586e-05	0.000422063
CD200	1595.79	-1.4611	0.106701	-13.6935	1.11065e-42	4.03692e-41
CD22	9.41486	-1.98377	0.592825	-3.3463	0.000818988	0.00302692
CD226	9.31949	1.96205	0.616117	3.18455	0.00144982	0.00508256
CD24	32578.3	-1.7624	0.0724796	-24.3158	1.33326e-130	2.55444e-128
CD2AP	1949.92	-1.41423	0.105274	-13.4337	3.83495e-41	1.31764e-39
CD302	13.7864	1.36401	0.51468	2.65022	0.00804395	0.023575
CD320	1498.41	-0.368001	0.117947	-3.12006	0.00180816	0.00620694
CD36	20.16	3.44092	0.56523	6.08765	1.14581e-09	9.25491e-09
CD37	95.4705	1.88161	0.239688	7.85024	4.15248e-15	5.14689e-14
CD3D	6.90221	-2.01498	0.641461	-3.14123	0.0016824	0.0058203
CD3EAP	281.646	-0.535984	0.143143	-3.7444	0.000180828	0.000756785
CD4	271.851	1.65095	0.165161	9.99601	1.58665e-23	3.01944e-22
CD40	10.5676	-1.65974	0.559379	-2.96712	0.00300606	0.00976452
CD44	236.961	2.23076	0.175535	12.7083	5.31477e-37	1.61067e-35
CD46	3628.73	-0.517479	0.07155	-7.23241	4.74483e-13	5.10328e-12
CD48	4.99021	-1.79544	0.67595	-2.65618	0.00790317	0.0232136
CD5	9.90706	3.19976	0.677145	4.72537	2.29695e-06	1.29921e-05
CD53	15.8079	-2.05149	0.496498	-4.13192	3.59746e-05	0.000171116
CD58	153.964	-0.585485	0.191637	-3.05517	0.00224931	0.00754578
CD59	1577.31	0.914623	0.107139	8.53678	1.38016e-17	1.95751e-16
CD63	6281.5	0.200556	0.0765557	2.61974	0.00879961	0.0255217
CD72	14.9493	-1.31802	0.477597	-2.7597	0.00578548	0.0176135
CD79A	10.7889	-1.53186	0.548058	-2.79506	0.00518898	0.0159914
CD79B	67.3046	-0.847328	0.255464	-3.31682	0.000910489	0.0033389
CD81	4754.81	0.229787	0.0780914	2.94254	0.0032553	0.0104837
CD82	389.004	2.65685	0.408191	6.50884	7.57312e-11	6.84853e-10
CD83	151.966	-0.749556	0.183277	-4.08973	4.31868e-05	0.000202524
CD9	1163.8	-3.55686	0.103839	-34.2535	3.87391e-257	2.91938e-254
CD99L2	1468.22	0.916469	0.0888638	10.3132	6.14287e-25	1.23998e-23
CDA	59.5199	-1.118	0.271154	-4.12311	3.73789e-05	0.00017705
CDADC1	131.241	0.736613	0.197989	3.72049	0.00019884	0.00082499
CDAN1	607.003	0.347383	0.117225	2.96339	0.00304272	0.0098666
CDC123	2999.97	-0.275726	0.0792922	-3.47733	0.000506426	0.00194749
CDC14B	1209.76	-0.922396	0.130785	-7.05279	1.75363e-12	1.80046e-11
CDC16	2422.11	-0.302268	0.0807525	-3.74314	0.000181732	0.000759913
CDC23	2265.51	0.219986	0.0899736	2.44501	0.0144847	0.0396059
CDC26	767.885	-0.460299	0.106398	-4.32619	1.5171e-05	7.64228e-05
CDC27	2685.55	0.313118	0.108746	2.87936	0.00398487	0.0125859
CDC34	2050.05	0.296598	0.0966954	3.06734	0.00215974	0.00726813
CDC37L1	469.72	-0.647887	0.120512	-5.37612	7.61083e-08	5.14551e-07
CDC40	990.083	-0.362657	0.118706	-3.05508	0.00224998	0.00754601
CDC42BPA	1428.7	-0.541069	0.102074	-5.30077	1.15316e-07	7.64086e-07
CDC42BPB	3919.33	0.328792	0.0769996	4.27005	1.95428e-05	9.66367e-05
CDC42BPG	200.521	-0.974985	0.167016	-5.83768	5.29313e-09	4.02377e-08
CDC42EP1	697.845	1.0472	0.1405	7.45338	9.09758e-14	1.02942e-12
CDC42EP2	432.604	-1.0746	0.132013	-8.14012	3.94883e-16	5.19645e-15
CDC42EP3	765.786	-1.38975	0.126445	-10.9909	4.22589e-28	9.59225e-27
CDC42EP4	1201.15	1.14545	0.0961399	11.9144	9.96293e-33	2.64058e-31
CDC45	1175.92	0.237897	0.0876088	2.71545	0.00661866	0.0198428
CDC6	4462.88	-0.32599	0.0813085	-4.0093	6.09e-05	0.000278259
CDC73	2676.73	-0.367319	0.0811473	-4.52657	5.99475e-06	3.18069e-05
CDCA4	1494.44	0.324571	0.0826753	3.92586	8.64215e-05	0.000384383
CDCA7L	1769.46	-1.02671	0.0902101	-11.3813	5.18102e-30	1.2541e-28
CDCA8	2706.97	0.529383	0.0842079	6.28662	3.24453e-10	2.75968e-09
CDCP1	77.9234	-3.93233	0.354025	-11.1075	1.15342e-28	2.65004e-27
CDH1	355.333	-7.10023	0.345769	-20.5346	1.05716e-93	1.10649e-91
CDH10	199.298	2.19372	0.23335	9.40102	5.40374e-21	9.25513e-20
CDH11	5645.4	4.60917	0.133529	34.5182	4.28393e-261	3.87404e-258
CDH12	7.18139	2.96406	0.676108	4.384	1.16522e-05	5.96136e-05
CDH13	19.645	1.06542	0.446413	2.38662	0.0170039	0.0454724
CDH2	7295.29	2.12827	0.0745118	28.5628	1.94609e-179	7.7188e-177
CDH20	36.5605	2.76587	0.41132	6.72439	1.76331e-11	1.67149e-10
CDH24	2308.11	2.17051	0.0896976	24.1981	2.3303e-129	4.39028e-127
CDH3	687.595	-3.22892	0.158521	-20.369	3.15307e-92	3.19662e-90
CDH4	883.567	1.09844	0.108549	10.1193	4.53534e-24	8.824e-23
CDH5	27.4005	-4.24778	0.520605	-8.15931	3.36944e-16	4.44696e-15
CDH6	727.766	2.84839	0.153144	18.5994	3.24928e-77	2.62356e-75
CDH7	126.313	3.72295	0.276151	13.4816	2.00686e-41	6.96943e-40
CDH8	59.0471	1.05082	0.320386	3.27987	0.00103856	0.003764
CDH9	8.6543	-3.61719	0.683532	-5.29191	1.21045e-07	7.99467e-07
CDHR3	98.9499	-1.51537	0.252724	-5.99617	2.02027e-09	1.5931e-08
CDIPT	910.764	-0.46553	0.119429	-3.89796	9.70046e-05	0.000427501
CDK14	1564.74	0.234653	0.0908879	2.58178	0.00982913	0.028143
CDK16	3119.34	0.35948	0.0780951	4.6031	4.16244e-06	2.26321e-05
CDK17	864.564	0.338323	0.126883	2.66642	0.00766636	0.0225796
CDK18	743.65	-0.878473	0.135221	-6.49656	8.21798e-11	7.40503e-10
CDK19	407.897	0.655162	0.133381	4.91196	9.01697e-07	5.36886e-06
CDK2	1542.62	0.402826	0.0853008	4.72241	2.33062e-06	1.31694e-05
CDK20	251.614	0.83885	0.154879	5.41615	6.08964e-08	4.16313e-07
CDK2AP1	3074.49	-0.336004	0.086035	-3.90544	9.4056e-05	0.000415566
CDK4	4566.66	0.34709	0.0758329	4.57703	4.71624e-06	2.54111e-05
CDK5R2	6.49313	1.6985	0.668731	2.53989	0.0110887	0.0312141
CDK5RAP1	1172.18	-0.355231	0.0873773	-4.06549	4.79323e-05	0.000222919
CDK6	1187.35	2.40954	0.287231	8.38888	4.9081e-17	6.74133e-16
CDK9	1540.85	-0.327101	0.0949302	-3.4457	0.000569582	0.00217042
CDKL2	19.6603	1.07425	0.437489	2.45548	0.0140696	0.0385885
CDKL5	400.811	-0.415859	0.119496	-3.4801	0.000501227	0.00192979
CDKN1A	555.034	2.48735	0.164812	15.092	1.82743e-51	8.24642e-50
CDKN1B	267.408	1.463	0.168668	8.67384	4.17784e-18	6.14525e-17
CDKN1C	239.311	0.767184	0.185903	4.1268	3.67846e-05	0.000174638
CDKN2AIP	1014.14	0.506754	0.0992791	5.10434	3.31953e-07	2.09339e-06
CDKN2AIPNL	1056.7	-0.246761	0.100811	-2.44775	0.014375	0.0393497
CDKN2B	20.7358	2.78904	0.535154	5.21165	1.87165e-07	1.21244e-06
CDON	867.05	0.468494	0.119914	3.9069	9.34862e-05	0.000413527
CDR2	727.116	-0.562072	0.123517	-4.55056	5.35031e-06	2.85822e-05
CDS1	517.413	-2.46008	0.132932	-18.5063	1.83553e-76	1.45606e-74
CDS2	1956.06	-0.273257	0.0818175	-3.33984	0.000838278	0.00309114
CDT1	1571.98	-0.290971	0.0936213	-3.10796	0.00188383	0.00643445
CDX1	1397.19	9.72354	0.44186	22.0059	2.52689e-107	3.34081e-105
CDX2	3986.25	10.9876	0.406341	27.0404	4.94727e-161	1.43395e-158
CDYL	2090.34	-1.08887	0.0797498	-13.6536	1.92204e-42	6.89739e-41
CEACAM1	31.17	-2.94225	0.436949	-6.73361	1.65501e-11	1.57278e-10
CEACAM19	83.5779	1.23068	0.244208	5.03948	4.66799e-07	2.88976e-06
CEACAM21	13.9856	1.72691	0.530354	3.25615	0.00112934	0.00406046
CEBPB	152.742	-1.57781	0.188953	-8.35028	6.80993e-17	9.26348e-16
CEBPZ	3343.87	-0.975349	0.0856293	-11.3904	4.67018e-30	1.13287e-28
CEBPZOS	25.7415	-1.22339	0.423815	-2.8866	0.00389423	0.012322
CECR1	850.764	-0.573466	0.100747	-5.69216	1.25445e-08	9.208e-08
CECR5	1549.86	-0.252583	0.0841575	-3.00132	0.00268815	0.0088398
CELF2	704.909	-1.58119	0.152913	-10.3405	4.62291e-25	9.35673e-24
CELF5	336.975	-1.18411	0.149846	-7.90216	2.74119e-15	3.43339e-14
CELSR1	953.798	1.27003	0.112744	11.2647	1.96038e-29	4.67513e-28
CELSR2	903.251	-0.498284	0.136961	-3.63815	0.000274607	0.00110973
CEMIP	65.3063	1.68151	0.391615	4.29377	1.75661e-05	8.76096e-05
CENPA	585.828	0.38619	0.117115	3.29754	0.000975353	0.00355945
CENPBD1P1	775.778	0.330779	0.101247	3.26707	0.00108667	0.00392138
CENPC	759.071	0.364361	0.110275	3.30413	0.000952721	0.00348416
CENPF	10313	0.597217	0.0985008	6.06307	1.33549e-09	1.07219e-08
CENPJ	1650.44	0.289827	0.0987384	2.9353	0.00333226	0.0107056
CENPN	1174.09	0.394895	0.0887694	4.44854	8.64554e-06	4.49123e-05
CENPU	3173.47	-0.279081	0.0922128	-3.02648	0.00247416	0.00821981
CENPV	2976.21	0.488616	0.077625	6.29458	3.08242e-10	2.62971e-09
CEP112	172.375	1.03645	0.183879	5.63658	1.73462e-08	1.25292e-07
CEP126	149.242	0.512046	0.177732	2.881	0.00396418	0.0125258
CEP152	833.21	0.338506	0.112314	3.01393	0.00257888	0.00852014
CEP162	860.3	0.450612	0.105509	4.27085	1.94725e-05	9.63947e-05
CEP164	1324.04	0.52669	0.0874417	6.02333	1.70867e-09	1.35876e-08
CEP170B	606.942	-0.934937	0.136221	-6.8634	6.72394e-12	6.59786e-11
CEP19	118.298	1.05422	0.211892	4.97527	6.51582e-07	3.9525e-06
CEP192	1926	0.659891	0.10541	6.26024	3.84377e-10	3.23649e-09
CEP250	1261.24	0.722267	0.0919988	7.85083	4.13285e-15	5.12537e-14
CEP290	1007.4	0.665136	0.13247	5.02103	5.1396e-07	3.16438e-06
CEP295	834.659	0.770499	0.116068	6.63835	3.17212e-11	2.95368e-10
CEP350	2270.4	0.60948	0.112224	5.43092	5.60653e-08	3.84564e-07
CEP41	611.833	0.443341	0.125099	3.54391	0.000394244	0.00154929
CEP55	1509.23	0.648268	0.131595	4.92624	8.38291e-07	5.0151e-06
CEP63	843.008	0.284771	0.0975703	2.91862	0.00351583	0.0112383
CEP68	1648.58	0.244945	0.0825553	2.96704	0.00300683	0.0097656
CEP78	2392.85	0.250024	0.106146	2.35548	0.0184989	0.0488408
CEP85	2379.06	0.28387	0.0776803	3.65433	0.00025785	0.00104658
CEP85L	202.549	0.904767	0.19188	4.71528	2.41373e-06	1.35948e-05
CEP89	1042.44	0.363181	0.0918854	3.95255	7.73237e-05	0.000346646
CEP97	508.59	0.399311	0.126841	3.14812	0.00164327	0.00569713
CERCAM	485.1	3.11434	0.179784	17.3227	3.17029e-67	2.04783e-65
CERK	2942.3	0.39334	0.088323	4.45343	8.45101e-06	4.39725e-05
CERKL	26.2259	1.11168	0.410146	2.71044	0.00671935	0.02011
CERS2	3089.88	-0.195442	0.0776832	-2.51588	0.0118734	0.0331809
CERS4	610.13	-1.01208	0.117881	-8.58559	9.03743e-18	1.29397e-16
CERS5	1480.12	0.271399	0.0872391	3.11097	0.00186472	0.00637593
CES1	7.91389	3.41109	0.687138	4.96421	6.89826e-07	4.16883e-06
CES1P1	27.9754	2.39123	0.437833	5.46151	4.72094e-08	3.26495e-07
CES2	770.196	0.411954	0.110995	3.71148	0.000206054	0.000852887
CETN2	1518.29	0.410281	0.090365	4.54026	5.6184e-06	2.99295e-05
CFAP20	1106.09	0.259341	0.0946475	2.74007	0.00614252	0.0185531
CFAP221	18.2592	1.11363	0.457349	2.43496	0.0148933	0.0405184
CFAP36	640.6	0.533605	0.120288	4.43607	9.16144e-06	4.73854e-05
CFAP43	33.4824	1.94468	0.378054	5.14392	2.69065e-07	1.71595e-06
CFAP44	103.535	0.708889	0.218521	3.24403	0.0011785	0.00421974
CFAP45	56.3679	2.7745	0.675721	4.10599	4.02585e-05	0.000189538
CFAP54	54.9391	0.94725	0.3184	2.97504	0.00292955	0.00955028
CFAP57	9.78964	1.94364	0.595874	3.26184	0.00110693	0.00398803
CFAP61	17.1119	2.5127	0.538435	4.66667	3.06122e-06	1.69752e-05
CFAP77	21.9207	2.03092	0.518105	3.9199	8.85853e-05	0.00039362
CFAP97	1191.26	-0.589714	0.115759	-5.09432	3.49993e-07	2.19979e-06
CFC1	5.24302	2.71385	0.71094	3.81728	0.000134933	0.000579074
CFDP1	1769.92	0.32118	0.0998016	3.21818	0.00129006	0.00457932
CFL2	1215.57	0.604222	0.117956	5.12242	3.01642e-07	1.91184e-06
CFP	26.6923	-1.08292	0.399056	-2.7137	0.00665367	0.0199372
CFTR	29.5403	-1.88541	0.40107	-4.70095	2.5896e-06	1.4513e-05
CGGBP1	3188.83	0.334011	0.0908389	3.67696	0.000236027	0.000964937
CGN	1146.46	-1.94534	0.105327	-18.4696	3.62919e-76	2.86884e-74
CGNL1	1170.3	-0.4946	0.122357	-4.04226	5.29396e-05	0.000244656
CGREF1	45.2208	-1.67574	0.325963	-5.14088	2.73457e-07	1.74101e-06
CH17-264L24.1	67.9813	0.711607	0.283735	2.508	0.0121416	0.0338503
CH507-42P11.8	37.1262	1.34106	0.351983	3.81003	0.000138951	0.000595064
CHAC1	207.304	-1.6289	0.170855	-9.53382	1.51605e-21	2.65285e-20
CHAC2	280.634	-0.966154	0.144554	-6.68367	2.33027e-11	2.18873e-10
CHAMP1	2827.42	0.202762	0.0754565	2.68714	0.00720675	0.0213819
CHCHD1	903.145	-0.324356	0.105623	-3.07089	0.00213419	0.00718964
CHCHD4	529.13	-0.667669	0.117492	-5.68266	1.32618e-08	9.7187e-08
CHCHD6	410.95	-0.545399	0.141458	-3.85555	0.000115469	0.000502022
CHCHD7	1078.13	0.473452	0.118027	4.01139	6.03616e-05	0.000275911
CHD2	2716.56	0.376495	0.0777902	4.83988	1.2992e-06	7.60745e-06
CHD3	3218.96	0.453151	0.0860599	5.26553	1.39783e-07	9.17601e-07
CHD4	14539.8	0.24489	0.0679674	3.60306	0.000314494	0.00125887
CHD9	1663.08	0.498789	0.103873	4.80189	1.57174e-06	9.10892e-06
CHDH	285.242	-1.2139	0.143176	-8.47836	2.28385e-17	3.19513e-16
CHEK2	1283.85	-0.498657	0.0984749	-5.0638	4.10981e-07	2.55681e-06
CHFR	802.122	0.75315	0.105447	7.14244	9.16867e-13	9.63669e-12
CHGA	3875.9	-4.41511	0.428722	-10.2983	7.17161e-25	1.44377e-23
CHI3L1	249.159	2.59183	0.192302	13.4779	2.10993e-41	7.31616e-40
CHIC1	514.907	0.734816	0.120147	6.116	9.59543e-10	7.80056e-09
CHL1	212.251	4.73332	0.664911	7.11874	1.08921e-12	1.13426e-11
CHML	1852.39	-0.364959	0.096935	-3.76499	0.000166557	0.000702393
CHMP1A	2165.91	0.279419	0.0950297	2.94034	0.00327856	0.0105511
CHMP1B	747.549	-0.519264	0.121219	-4.28368	1.83828e-05	9.13e-05
CHMP2A	822.759	-0.326541	0.103692	-3.14913	0.00163757	0.00568102
CHMP2B	1259.82	-0.658062	0.118698	-5.54402	2.95612e-08	2.09046e-07
CHMP3	648.703	1.4117	0.111714	12.6367	1.32486e-36	3.95152e-35
CHN1	1171.32	-0.316774	0.0953302	-3.32291	0.000890841	0.00327216
CHN2	160.95	0.636935	0.179896	3.54057	0.000399268	0.00156612
CHODL	171.327	-3.27925	0.207845	-15.7774	4.45011e-56	2.26595e-54
CHPF2	925.072	0.3049	0.116114	2.62588	0.0086426	0.0251179
CHPT1	398.391	-0.540338	0.126511	-4.27107	1.94541e-05	9.63247e-05
CHRD	1871.79	2.85964	0.605808	4.72038	2.35405e-06	1.32851e-05
CHRDL1	679.914	-1.01432	0.109516	-9.26179	2.01031e-20	3.35665e-19
CHRM3	71.7295	-0.972966	0.25771	-3.77542	0.000159736	0.00067602
CHRNA3	105.123	1.20574	0.231512	5.20812	1.90766e-07	1.234e-06
CHRNA4	22.0777	-2.11196	0.436386	-4.83966	1.3006e-06	7.61168e-06
CHRNA7	155.835	1.39566	0.198561	7.02886	2.0823e-12	2.12632e-11
CHRNA9	189.828	-1.5354	0.177255	-8.66212	4.63065e-18	6.78922e-17
CHRNB1	236.802	-0.490427	0.148105	-3.31135	0.000928482	0.00339937
CHRNB2	272.523	-1.81476	0.148266	-12.2399	1.90179e-34	5.34773e-33
CHRNB4	27.014	-2.15532	0.401963	-5.36197	8.2318e-08	5.54543e-07
CHRND	23.1182	1.94076	0.445966	4.35181	1.35021e-05	6.8443e-05
CHST11	644.255	0.509749	0.109699	4.64678	3.37152e-06	1.85503e-05
CHST13	31.2241	-4.11269	0.492384	-8.35262	6.67676e-17	9.09327e-16
CHST14	793.495	0.291233	0.108658	2.68027	0.00735638	0.0217716
CHST15	497.189	-0.939054	0.146277	-6.41971	1.36537e-10	1.20524e-09
CHST4	228.049	-3.92315	0.210249	-18.6595	1.05655e-77	8.65448e-76
CHST6	725.214	0.263918	0.107674	2.45109	0.0142426	0.0390062
CHST7	424.182	-1.18352	0.394748	-2.99818	0.00271602	0.00891977
CHST8	58.5878	-1.82386	0.29623	-6.15692	7.41742e-10	6.0935e-09
CHST9	81.1565	-1.9671	0.264441	-7.4387	1.01679e-13	1.14652e-12
CHTF8	3308.41	0.272395	0.0782493	3.48112	0.000499321	0.00192409
CHURC1	434.063	0.363808	0.132155	2.75289	0.00590721	0.0179479
CIPC	802.283	-0.534051	0.103464	-5.1617	2.44723e-07	1.566e-06
CIRBP	6305.32	0.389292	0.0907818	4.28822	1.80112e-05	8.96122e-05
CISD3	149.615	-0.518997	0.19252	-2.69581	0.00702185	0.0209074
CISH	110.987	1.44529	0.223478	6.46723	9.98148e-11	8.93354e-10
CISTR	12.0071	2.9523	0.601366	4.90932	9.13909e-07	5.43442e-06
CIT	2224.04	0.65748	0.102716	6.40094	1.54426e-10	1.35847e-09
CITED1	216.375	3.41395	0.417235	8.18232	2.7842e-16	3.68748e-15
CITED2	3222.54	0.764391	0.0848513	9.0086	2.08712e-19	3.29739e-18
CITED4	117.677	-1.48193	0.229005	-6.47117	9.72466e-11	8.71749e-10
CKAP2	4583.11	0.245138	0.0962649	2.54649	0.0108812	0.0306811
CKAP2L	1145.35	0.28603	0.111677	2.56123	0.0104303	0.0296166
CKAP4	5738.15	1.04668	0.0723044	14.4761	1.71601e-47	7.13155e-46
CKAP5	8841.09	0.715488	0.0906468	7.89314	2.94682e-15	3.68279e-14
CKB	1220.93	1.35877	0.106933	12.7067	5.42698e-37	1.64248e-35
CKMT1A	168.307	-1.25934	0.174993	-7.19652	6.17679e-13	6.60259e-12
CKMT1B	207.749	-1.46339	0.165677	-8.83281	1.02076e-18	1.55299e-17
CKMT2	82.1378	1.76405	0.253896	6.94791	3.70736e-12	3.7235e-11
CKMT2-AS1	186.626	1.14155	0.167832	6.80173	1.03367e-11	9.98256e-11
CKS1B	6980.99	0.220613	0.0857722	2.57208	0.0101089	0.0288271
CLASP2	2235.9	0.28434	0.082255	3.45681	0.000546606	0.00208815
CLCA2	15.3614	3.13145	0.568438	5.50888	3.61133e-08	2.52771e-07
CLCN1	13.2526	-1.82508	0.55443	-3.29181	0.000995436	0.00362747
CLCN2	841.274	0.557687	0.147271	3.78682	0.000152586	0.000648555
CLCN3	1962.54	0.320441	0.0890153	3.59984	0.000318412	0.00127342
CLCN4	402.3	-0.372043	0.144338	-2.57759	0.00994925	0.0284581
CLCN5	967.846	1.38836	0.122949	11.2922	1.43435e-29	3.43515e-28
CLCN6	1511.76	0.277762	0.0995722	2.78955	0.00527809	0.0162305
CLDN1	66.693	-1.00244	0.271943	-3.68622	0.000227614	0.000934621
CLDN10	327.042	-2.58148	0.169237	-15.2537	1.5558e-52	7.23734e-51
CLDN11	353.27	-0.425161	0.135877	-3.12901	0.00175394	0.00603732
CLDN15	203.488	0.538932	0.170652	3.15807	0.00158817	0.00552483
CLDN3	67.7174	-5.68331	0.482719	-11.7735	5.34338e-32	1.39174e-30
CLDN6	7533.95	-1.76116	0.0996405	-17.6752	6.51594e-70	4.51878e-68
CLDN7	12.2174	-1.38396	0.518692	-2.66818	0.00762642	0.0224796
CLDN9	8.30522	-1.49391	0.599865	-2.49042	0.0127593	0.0353327
CLEC10A	6.89599	2.499	0.706528	3.53701	0.000404684	0.00158399
CLEC11A	412.057	1.70786	0.15534	10.9943	4.06862e-28	9.24457e-27
CLEC14A	12.3981	-3.3919	0.610373	-5.55709	2.74304e-08	1.94281e-07
CLEC16A	577.386	0.415195	0.111458	3.72512	0.000195224	0.000811029
CLEC1A	75.2557	3.78562	0.371438	10.1918	2.15757e-24	4.25269e-23
CLEC4D	5.64749	-3.02207	0.704299	-4.29088	1.77964e-05	8.86605e-05
CLEC4E	7.05216	1.61366	0.631135	2.55675	0.0105654	0.0299328
CLGN	359.038	-1.23885	0.15572	-7.95563	1.78221e-15	2.25474e-14
CLHC1	154.782	0.425865	0.1747	2.4377	0.0147812	0.040257
CLIC1	7861.18	0.246193	0.0738299	3.33459	0.000854245	0.00314489
CLIC4	10055.3	-0.308173	0.111007	-2.77615	0.00550063	0.0168484
CLIP1	1403.57	0.211868	0.0849374	2.49441	0.0126168	0.0350075
CLIP3	591.447	0.319136	0.112791	2.82944	0.0046629	0.0145104
CLIP4	45.5294	1.92203	0.339004	5.66963	1.43108e-08	1.0457e-07
CLK1	1231.51	0.402075	0.126919	3.16797	0.00153507	0.00535818
CLK3	1229.66	0.307945	0.0915809	3.36254	0.000772277	0.00286835
CLMN	176.302	-0.729882	0.168073	-4.34264	1.40782e-05	7.11557e-05
CLMP	990.072	-0.322847	0.114822	-2.81171	0.00492783	0.0152426
CLN8	617.892	-0.7883	0.118364	-6.65998	2.73867e-11	2.56169e-10
CLNS1A	3360.79	-0.202404	0.0839922	-2.40979	0.0159616	0.0430313
CLPX	1313.31	-0.404583	0.0880671	-4.59403	4.3477e-06	2.35601e-05
CLSPN	1791.65	0.29207	0.10655	2.74116	0.00612223	0.0185017
CLSTN1	4420.99	0.397381	0.0817589	4.8604	1.17147e-06	6.89882e-06
CLSTN2	132.756	3.83043	0.276942	13.8311	1.6536e-43	6.1286e-42
CLTC	12196.9	-0.503961	0.0837185	-6.01971	1.74727e-09	1.38702e-08
CLU	2649.21	-0.394291	0.094696	-4.16376	3.13051e-05	0.000150296
CLUAP1	375.409	0.617792	0.137458	4.49439	6.97697e-06	3.67529e-05
CLUH	3439.9	-0.247587	0.102129	-2.42425	0.0153399	0.0416181
CLUHP3	455.422	-0.346508	0.123688	-2.80148	0.00508695	0.0156983
CLVS2	44.563	1.24825	0.354738	3.51879	0.000433514	0.00168748
CLYBL	178.643	-1.37078	0.1729	-7.92814	2.2245e-15	2.79864e-14
CMAS	1506.56	-0.734538	0.0923356	-7.95509	1.78998e-15	2.26331e-14
CMB9-22P13.1	6.6647	2.05858	0.658914	3.1242	0.0017829	0.00612674
CMKLR1	92.2869	1.18579	0.237619	4.9903	6.0286e-07	3.67767e-06
CMTM3	1650.33	0.700675	0.0999449	7.01061	2.37288e-12	2.40998e-11
CMTM8	65.953	-0.950249	0.255601	-3.71771	0.00020104	0.000833659
CNBP	9727.52	-0.178201	0.0749676	-2.37703	0.0174525	0.0464962
CNDP2	5892.26	-0.474837	0.0703092	-6.75355	1.44272e-11	1.37682e-10
CNIH3	103.178	-0.638418	0.232971	-2.74033	0.00613776	0.0185412
CNKSR1	358.551	-1.18499	0.145613	-8.13795	4.02022e-16	5.28733e-15
CNKSR3	554.106	2.03779	0.124235	16.4027	1.82931e-60	1.02116e-58
CNN1	952.443	1.91443	0.100484	19.0521	6.30633e-81	5.44174e-79
CNN3	7166.55	0.406204	0.0862773	4.70813	2.50004e-06	1.40355e-05
CNNM2	433.243	-0.329795	0.119304	-2.76432	0.00570421	0.017389
CNOT11	1649.53	-0.235168	0.0843872	-2.78677	0.00532357	0.0163571
CNOT6	2284.68	0.244332	0.0911524	2.68048	0.00735165	0.0217633
CNOT6L	289.492	-0.718852	0.145519	-4.93992	7.81532e-07	4.69667e-06
CNP	2335.37	0.403809	0.0847462	4.76492	1.88924e-06	1.08077e-05
CNPY4	449.837	0.693125	0.128939	5.37562	7.6321e-08	5.15834e-07
CNR1	10.8149	1.50394	0.559166	2.68961	0.00715345	0.0212489
CNST	697.169	-0.293594	0.103084	-2.84811	0.00439791	0.0137578
CNTFR	1715.84	4.02083	0.108532	37.0474	1.98053e-300	2.63387e-297
CNTFR-AS1	17.7834	2.5224	0.511528	4.93112	8.17615e-07	4.89919e-06
CNTLN	754.88	-0.845903	0.104345	-8.10678	5.19788e-16	6.7927e-15
CNTN1	28.7847	-1.89454	0.389676	-4.86183	1.16304e-06	6.85274e-06
CNTN2	164.187	-3.61652	0.223474	-16.1832	6.62464e-59	3.5916e-57
CNTN4	59.2939	1.88682	0.334189	5.64598	1.64248e-08	1.18978e-07
CNTN6	12.6	2.85286	0.623534	4.57531	4.75511e-06	2.55961e-05
CNTNAP1	721.939	0.520576	0.118917	4.37764	1.19971e-05	6.12507e-05
CNTNAP2	2620.73	0.403551	0.125932	3.20451	0.00135292	0.00478069
CNTNAP3	217.52	0.538604	0.226033	2.38285	0.017179	0.0458648
CNTRL	1140.93	0.316287	0.0978517	3.23231	0.00122792	0.004378
CNTROB	1225.53	0.478493	0.100366	4.76747	1.86553e-06	1.06802e-05
COA3	990.169	-0.423395	0.0973604	-4.34874	1.36925e-05	6.93924e-05
COA4	1612.61	-0.455901	0.0925044	-4.92843	8.28948e-07	4.96315e-06
COA6	438.195	-0.662863	0.123234	-5.3789	7.49408e-08	5.07112e-07
COA7	1833.6	-0.63241	0.0848323	-7.45482	8.99877e-14	1.01926e-12
COASY	1342.93	-0.366874	0.0902816	-4.06367	4.83074e-05	0.000224534
COBL	157.316	-3.34604	0.474459	-7.05233	1.7595e-12	1.80566e-11
COBLL1	79.8669	-1.04834	0.244403	-4.28938	1.7917e-05	8.92022e-05
COG1	606.97	0.311948	0.110362	2.8266	0.00470452	0.0146119
COL11A1	1873.51	2.22499	0.104102	21.3733	2.37031e-101	2.82042e-99
COL12A1	844.431	4.30276	0.173069	24.8615	1.9436e-136	4.18485e-134
COL13A1	610.864	2.28171	0.151428	15.068	2.63018e-51	1.17982e-49
COL14A1	621.372	2.58217	0.150658	17.1393	7.56172e-66	4.70952e-64
COL1A1	4919.76	1.27608	0.10573	12.0692	1.53548e-33	4.18746e-32
COL1A2	11166.9	1.51516	0.0788173	19.2236	2.34673e-82	2.07246e-80
COL21A1	61.3434	-1.09178	0.292723	-3.72972	0.000191694	0.000797831
COL22A1	128.396	-0.672996	0.194341	-3.46296	0.000534267	0.0020462
COL23A1	216.485	-0.884005	0.204554	-4.32162	1.54887e-05	7.78152e-05
COL24A1	54.0498	-2.01683	0.328396	-6.14145	8.17693e-10	6.69555e-09
COL26A1	2233.57	-1.12189	0.0956456	-11.7296	8.98568e-32	2.3164e-30
COL27A1	1198.8	1.00524	0.111522	9.01382	1.99009e-19	3.15119e-18
COL28A1	14.5778	1.73165	0.505308	3.42693	0.000610452	0.0023138
COL2A1	7675.4	3.206	0.422806	7.58267	3.38523e-14	3.93892e-13
COL3A1	2076.09	7.28158	0.42159	17.2717	7.68422e-67	4.87991e-65
COL4A1	4418.75	1.15609	0.0740506	15.6122	6.01285e-55	2.96809e-53
COL4A2	5073.74	1.15356	0.0908246	12.701	5.83808e-37	1.76454e-35
COL4A5	1907.92	0.861679	0.0860293	10.0161	1.29502e-23	2.48116e-22
COL5A1	1796.61	1.51842	0.130173	11.6646	1.93306e-31	4.92701e-30
COL5A3	79.6058	1.61514	0.276085	5.85017	4.91064e-09	3.74308e-08
COL6A2	800.618	-0.530864	0.128008	-4.14713	3.36663e-05	0.000160847
COL6A3	191.958	1.21284	0.186561	6.50102	7.97761e-11	7.19991e-10
COL7A1	758.217	0.86606	0.125659	6.89215	5.49554e-12	5.43258e-11
COL8A2	31.7579	-1.62376	0.367843	-4.41428	1.01348e-05	5.21932e-05
COL9A1	1145.31	-1.14426	0.163665	-6.99148	2.71992e-12	2.75009e-11
COL9A2	248.712	1.21117	0.163386	7.41295	1.23517e-13	1.38653e-12
COLEC12	738.283	3.99227	0.135583	29.4453	1.44489e-190	6.80544e-188
COLGALT1	2703.32	0.267861	0.083188	3.21995	0.00128215	0.00455338
COLGALT2	240.103	1.61003	0.174511	9.22597	2.81014e-20	4.64753e-19
COMMD3	39.1174	2.10846	0.35424	5.95208	2.64749e-09	2.06465e-08
COMMD8	290.567	0.717199	0.149955	4.78275	1.72912e-06	9.96482e-06
COMTD1	100.591	-1.14312	0.215759	-5.29815	1.16984e-07	7.7423e-07
COPRS	1042.41	0.302194	0.0963028	3.13795	0.00170131	0.00587675
COPS6	2937.83	-0.257382	0.0843648	-3.05082	0.00228214	0.00764705
COPS7B	2145.23	0.384802	0.0825718	4.66021	3.15893e-06	1.74657e-05
COPZ1	3088.29	0.272976	0.0729797	3.74044	0.0001837	0.000767527
COQ10B	351.439	-0.716315	0.135973	-5.26806	1.37869e-07	9.0609e-07
COQ3	318.508	-0.921071	0.138647	-6.64327	3.06791e-11	2.85782e-10
COQ4	865.173	0.325727	0.121192	2.68771	0.00719443	0.021351
COQ9	751.03	-0.585299	0.125318	-4.67051	3.00457e-06	1.66816e-05
CORO1B	1553.66	-0.367357	0.113948	-3.22389	0.00126461	0.00449603
CORO1C	5537.44	0.381796	0.0856109	4.45967	8.20851e-06	4.27697e-05
CORO2A	835.311	-0.3972	0.107266	-3.70296	0.000213097	0.000879786
CORO2B	500.641	-1.19412	0.15768	-7.57303	3.64619e-14	4.22734e-13
COTL1	9988.37	1.88116	0.0728265	25.8307	4.01243e-147	9.65031e-145
COX15	1082.22	-0.242379	0.0944337	-2.56665	0.0102685	0.0292196
COX17	512.484	-0.305071	0.118456	-2.5754	0.0100124	0.0285989
COX5A	2822.29	-0.67321	0.0792773	-8.49184	2.03399e-17	2.85264e-16
COX5B	2063.65	-0.423128	0.104536	-4.04767	5.1731e-05	0.000239463
COX6A1	954.518	-0.363385	0.095717	-3.79645	0.000146783	0.000625526
COX6B2	10.1356	-1.3587	0.574069	-2.36679	0.0179433	0.0476307
COX7B	1822.72	-0.277359	0.102644	-2.70216	0.00688901	0.0205525
COX7C	6074.64	-0.569507	0.0820614	-6.94001	3.92071e-12	3.93254e-11
CP	21.618	-1.60174	0.47788	-3.35175	0.000803021	0.00297199
CPA1	6.67475	2.97497	0.705986	4.21393	2.50966e-05	0.000122176
CPA2	21.6501	1.77153	0.481472	3.67941	0.000233775	0.000957459
CPA4	7.36398	2.06583	0.671246	3.07761	0.00208669	0.00704853
CPAMD8	505.286	1.47442	0.130035	11.3386	8.44624e-30	2.03792e-28
CPD	2241.97	0.690086	0.0820578	8.40976	4.10854e-17	5.66032e-16
CPE	712.245	1.54073	0.143285	10.7529	5.74326e-27	1.2509e-25
CPEB2	79.118	2.17313	0.264712	8.20941	2.22285e-16	2.96135e-15
CPEB4	388.531	-0.380853	0.1463	-2.60324	0.00923483	0.0266472
CPNE2	1578.5	0.40975	0.114138	3.58996	0.000330734	0.0013185
CPNE9	78.1224	-1.75997	0.270269	-6.51192	7.41952e-11	6.71499e-10
CPS1	1177.39	1.26084	0.102109	12.3479	4.99851e-35	1.42865e-33
CPSF1	3693.04	0.32389	0.0998975	3.24222	0.00118603	0.00424267
CPSF2	3539.43	-0.326551	0.102805	-3.1764	0.00149113	0.00521689
CPSF3	3264.81	-0.319347	0.0941725	-3.39109	0.000696159	0.00261094
CPT1A	87.2739	-3.19934	0.278935	-11.4699	1.86966e-30	4.57533e-29
CPT1C	1923.05	-0.279762	0.105076	-2.66248	0.00775667	0.0228278
CPT2	427.38	-0.31058	0.118252	-2.62642	0.00862886	0.0250812
CPVL	1631.7	0.423216	0.0849776	4.98033	6.34767e-07	3.85775e-06
CPXM1	4641.01	1.88608	0.115364	16.349	4.4191e-60	2.43676e-58
CPXM2	161.047	-5.61685	0.336016	-16.716	1.00157e-62	5.83596e-61
CPZ	10.359	-1.8163	0.568698	-3.19378	0.00140423	0.00493577
CR2	55.8552	-4.24884	0.395799	-10.7348	6.98419e-27	1.5168e-25
CRABP2	18497.4	4.43808	0.0872878	50.8442	0	0
CRACR2A	50.4619	-1.46552	0.30236	-4.84694	1.25382e-06	7.35506e-06
CRB1	19.8314	1.51427	0.479623	3.15721	0.00159284	0.00553674
CRB2	1715.95	3.54843	0.149779	23.691	4.45947e-124	7.63785e-122
CRB3	18.1701	-4.39837	0.61429	-7.16009	8.06256e-13	8.52167e-12
CREB3L1	674.895	-0.79794	0.115295	-6.92087	4.48868e-12	4.48036e-11
CREB3L3	4.44909	-1.89134	0.697391	-2.71202	0.00668746	0.0200225
CREB3L4	644.832	-0.994318	0.106866	-9.30432	1.34855e-20	2.27183e-19
CREB5	63.8602	0.79605	0.263147	3.02511	0.00248539	0.00824985
CREBBP	3363.31	0.330758	0.0858427	3.85307	0.000116645	0.000506651
CREBL2	534.317	-0.721376	0.126822	-5.68811	1.28456e-08	9.42292e-08
CREBZF	2624.56	-0.23794	0.0767725	-3.09928	0.0019399	0.00660699
CREG1	1332.01	0.491981	0.0897593	5.48112	4.22641e-08	2.93912e-07
CRELD1	625.25	0.624576	0.122453	5.10051	3.38733e-07	2.13376e-06
CRHR1	105.983	4.07989	0.328785	12.409	2.33562e-35	6.74376e-34
CRHR1-IT1	573.943	-0.567075	0.119456	-4.74715	2.06302e-06	1.17365e-05
CRIM1	599.562	-0.338808	0.107952	-3.13851	0.0016981	0.00586654
CRIP2	391.891	0.84614	0.205299	4.1215	3.76417e-05	0.000178221
CRIP3	148.491	-1.48962	0.202658	-7.35041	1.97605e-13	2.18244e-12
CRIPT	302.063	-0.579372	0.145067	-3.99382	6.50184e-05	0.000295821
CRISPLD1	1552.77	0.636674	0.0852846	7.46528	8.31226e-14	9.43391e-13
CRISPLD2	30.0144	-1.4459	0.380001	-3.805	0.000141806	0.000605926
CRLF1	157.58	1.55808	0.493439	3.15759	0.00159078	0.00553129
CRLF3	523.531	-0.278345	0.113457	-2.45331	0.0141547	0.0387796
CRMP1	4158.56	0.880711	0.097108	9.0694	1.19679e-19	1.92303e-18
CRNDE	138.359	1.99446	0.205144	9.72226	2.42352e-22	4.39031e-21
CROCC	1893.95	-0.509567	0.126051	-4.04253	5.28774e-05	0.000244469
CRTAC1	71.4914	2.88212	0.323931	8.89734	5.72011e-19	8.83939e-18
CRTAM	27.4856	4.71641	0.601605	7.83971	4.51585e-15	5.58808e-14
CRTAP	2754.64	0.198017	0.0801652	2.47011	0.013507	0.0371674
CRTC1	520.271	0.773974	0.173086	4.4716	7.76347e-06	4.06383e-05
CRY2	648.077	0.267591	0.112305	2.38272	0.0171855	0.0458767
CRYAB	131.866	-0.827217	0.195875	-4.2232	2.40862e-05	0.000117713
CRYBA4	50.2567	-2.03696	0.393908	-5.17117	2.32631e-07	1.49328e-06
CRYBB1	36.8294	-1.66375	0.373886	-4.44988	8.59201e-06	4.46445e-05
CRYBG3	319.247	0.401685	0.151178	2.65703	0.00788332	0.0231613
CRYGEP	27.7201	-2.77329	0.426517	-6.50218	7.91665e-11	7.1506e-10
CRYM	177.424	1.49395	0.428945	3.48284	0.000496131	0.00191245
CRYZL1	552.358	0.351948	0.112599	3.12569	0.00177387	0.00610067
CSAD	226.5	0.709032	0.169755	4.17679	2.95652e-05	0.000142549
CSDC2	57.9484	-1.10999	0.294815	-3.76505	0.000166514	0.000702342
CSE1L	13092.5	-0.248639	0.0896096	-2.77469	0.00552547	0.0169131
CSF1	712.633	1.92893	0.106726	18.0736	5.14231e-73	3.81172e-71
CSF3R	8.27205	3.14959	0.668581	4.71085	2.46686e-06	1.38664e-05
CSGALNACT1	17.9597	1.91526	0.513595	3.72913	0.000192142	0.000799402
CSGALNACT2	535.764	0.843069	0.118188	7.13328	9.80057e-13	1.02484e-11
CSK	1900.85	0.472615	0.105845	4.46517	8.0005e-06	4.17629e-05
CSMD2	564.177	-1.06722	0.140237	-7.61011	2.73857e-14	3.20833e-13
CSMD3	15.8547	3.56686	0.588332	6.06268	1.33875e-09	1.07442e-08
CSNK1A1	3060.85	-0.267058	0.0742345	-3.59749	0.000321304	0.00128408
CSNK1E	3932.14	0.228425	0.0814693	2.80382	0.00505012	0.0155932
CSNK2A2	2673.79	-0.274685	0.0885341	-3.10259	0.00191833	0.00654438
CSPP1	729.739	0.623788	0.11116	5.6116	2.00465e-08	1.44013e-07
CSRNP1	247.875	-0.563882	0.153869	-3.66468	0.000247645	0.00100879
CSRNP2	1635.1	0.341704	0.0809287	4.22228	2.41843e-05	0.000118167
CSRNP3	256.517	1.26114	0.172525	7.30989	2.67356e-13	2.91577e-12
CST1	78.9642	-0.996239	0.246271	-4.0453	5.22566e-05	0.000241698
CST2	26.923	2.99198	0.462553	6.4684	9.9046e-11	8.87176e-10
CST3	1158.33	1.62465	0.140881	11.5321	9.09404e-31	2.25437e-29
CSTB	1394.6	-0.238845	0.095158	-2.50999	0.0120736	0.0337051
CSTF1	1491.66	-0.220726	0.0855528	-2.58	0.00987997	0.0282742
CTA-293F17.1	19.4369	1.08499	0.439178	2.4705	0.0134925	0.0371318
CTA-414D7.1	35.5655	-3.22473	0.407458	-7.91425	2.4874e-15	3.12591e-14
CTA-963H5.5	2.9653	1.75709	0.7158	2.45473	0.0140992	0.038651
CTA-984G1.5	42.8067	-0.934542	0.307358	-3.04056	0.00236138	0.00788452
CTA-989H11.1	27.4637	-0.963926	0.378215	-2.54862	0.0108151	0.0305368
CTB-1144G6.6	4.10182	2.52407	0.713975	3.53523	0.000407422	0.00159332
CTB-119C2.1	19.3084	-1.23394	0.444743	-2.77449	0.00552879	0.0169209
CTB-131K11.1	360.232	0.312508	0.129701	2.40945	0.0159767	0.0430601
CTB-134H23.3	9.3172	-1.86066	0.588467	-3.16188	0.00156753	0.00545966
CTB-151G24.2	5.30529	-2.38028	0.686577	-3.46688	0.000526533	0.00201829
CTB-171A8.1	18.4371	-2.38516	0.498142	-4.78812	1.68355e-06	9.71706e-06
CTB-193M12.5	117.036	0.985455	0.211731	4.65427	3.25138e-06	1.79286e-05
CTB-25B13.12	19.8115	2.24027	0.469707	4.7695	1.84686e-06	1.05848e-05
CTB-41I6.1	2.92479	-1.91918	0.716435	-2.67879	0.00738878	0.021856
CTB-41I6.2	3.23855	-2.32109	0.71674	-3.23839	0.00120205	0.00429317
CTB-58E17.1	19.9326	2.14216	0.513618	4.17072	3.03639e-05	0.000146088
CTB-89H12.4	387.66	-0.853645	0.150889	-5.65745	1.53639e-08	1.11867e-07
CTBP1	1932.86	0.277322	0.0924262	3.00047	0.00269566	0.00885934
CTBP2	5934.26	-0.331756	0.0695631	-4.76914	1.85016e-06	1.06002e-05
CTBP2P8	6.70179	2.74454	0.690412	3.97522	7.03146e-05	0.000317935
CTC-254B4.1	7.15761	-3.40043	0.690725	-4.92298	8.52344e-07	5.09513e-06
CTC-286N12.1	14.6635	-1.51951	0.504885	-3.00961	0.00261582	0.00862706
CTC-297N7.9	10.6381	-2.01876	0.564161	-3.57834	0.000345778	0.00137436
CTC-301O7.4	31.4834	1.13221	0.363625	3.11368	0.00184771	0.00632351
CTC-304I17.5	23.9769	-4.37945	0.55495	-7.8916	2.98328e-15	3.72424e-14
CTC-304I17.6	20.0271	-3.89027	0.555378	-7.00472	2.47472e-12	2.5089e-11
CTC-338M12.9	66.753	0.606399	0.255824	2.37037	0.0177701	0.0472031
CTC-439O9.1	4.42504	-2.4656	0.704726	-3.49866	0.000467598	0.00180987
CTC-455F18.1	32.8788	-2.52061	0.40018	-6.2987	3.00156e-10	2.5646e-09
CTC-458G6.4	2.8133	-2.08896	0.715915	-2.91789	0.00352406	0.0112595
CTC-526N19.1	50.566	-3.15715	0.354154	-8.91461	4.89532e-19	7.59077e-18
CTC-529P8.1	2.65104	1.89506	0.713586	2.65568	0.00791476	0.0232386
CTC-591M7.1	7.59772	-2.74028	0.666968	-4.10856	3.98134e-05	0.000187756
CTC1	915.7	-0.305346	0.108213	-2.8217	0.00477693	0.0148184
CTCF	3789.29	-0.251652	0.0744167	-3.38167	0.000720478	0.00269283
CTCFL	150.816	-3.89243	0.244569	-15.9155	4.94982e-57	2.57847e-55
CTD-2015G9.2	190.968	-5.25491	0.295318	-17.7941	7.85866e-71	5.56955e-69
CTD-2034I21.2	21.6379	-2.19657	0.457913	-4.79691	1.61128e-06	9.32374e-06
CTD-2058B24.2	103.041	-4.49466	0.330953	-13.5809	5.19612e-42	1.83267e-40
CTD-2142D14.1	13.4084	-4.02131	0.635068	-6.3321	2.4184e-10	2.09484e-09
CTD-2195M15.1	2.1352	-1.70999	0.705707	-2.42309	0.015389	0.0417214
CTD-2227E11.1	19.8635	-1.45803	0.448913	-3.2479	0.00116258	0.00416805
CTD-2228K2.7	218.585	0.8526	0.180059	4.73512	2.18923e-06	1.2417e-05
CTD-2263F21.1	3.17751	1.83878	0.715083	2.57141	0.0101284	0.0288736
CTD-2270P14.1	198.43	0.535051	0.15904	3.36425	0.000767517	0.00285114
CTD-2297D10.2	32.9522	-1.86526	0.408252	-4.56891	4.90277e-06	2.63345e-05
CTD-2298J14.2	22.2253	2.87645	0.493541	5.82819	5.60324e-09	4.24952e-08
CTD-2306M5.1	134.908	-1.99274	0.20054	-9.93684	2.87811e-23	5.43141e-22
CTD-2308L22.1	15.498	2.21816	0.511507	4.33651	1.44763e-05	7.31028e-05
CTD-2311M21.2	956.99	5.65043	0.193171	29.2509	4.37675e-188	2.01938e-185
CTD-2311M21.3	52.3744	1.51484	0.31862	4.75438	1.99056e-06	1.13328e-05
CTD-2334D19.1	9.66284	1.78094	0.587104	3.03343	0.00241793	0.00804955
CTD-2354A18.1	91.0737	-4.1378	0.313787	-13.1867	1.04733e-39	3.49232e-38
CTD-2373N4.3	127.877	-0.732525	0.276744	-2.64694	0.00812237	0.0237771
CTD-2377D24.6	5.76299	1.80661	0.672619	2.68593	0.00723277	0.0214478
CTD-2396E7.11	6.09436	-2.8867	0.689915	-4.18414	2.86247e-05	0.000138191
CTD-2501M5.1	21.332	-3.08574	0.501955	-6.14744	7.87448e-10	6.4549e-09
CTD-2587M23.1	20.3334	-2.50855	0.474724	-5.28424	1.26229e-07	8.32249e-07
CTD-2619J13.19	9.17699	1.48121	0.595573	2.48703	0.0128813	0.0356103
CTD-2626G11.2	9.87961	-1.80535	0.60704	-2.97403	0.00293919	0.00957621
CTD-2630F21.1	33.2293	-1.01447	0.373005	-2.71972	0.00653376	0.0196247
CTD-3064M3.3	85.8003	0.652023	0.25424	2.56459	0.0103296	0.0293641
CTD-3064M3.7	27.3981	1.0051	0.396142	2.53721	0.011174	0.0314292
CTD-3076O17.2	3.67965	1.67366	0.70841	2.36256	0.0181493	0.048075
CTD-3099C6.9	101.286	0.856735	0.223467	3.83383	0.000126165	0.000543799
CTD-3113P16.11	169.504	1.00557	0.171405	5.86664	4.44716e-09	3.40588e-08
CTD-3157E16.2	100.563	-0.772256	0.225557	-3.42377	0.000617579	0.00233795
CTDSP1	791.729	0.592333	0.104975	5.64261	1.6749e-08	1.21172e-07
CTDSP2	5059.04	-0.311448	0.073488	-4.23808	2.25437e-05	0.000110557
CTDSPL	2061.19	1.14081	0.107127	10.6491	1.75967e-26	3.74953e-25
CTF1	28.191	1.23349	0.378014	3.26308	0.00110209	0.00397258
CTHRC1	40.3	3.05813	0.450626	6.78641	1.1496e-11	1.10596e-10
CTIF	520.831	0.948473	0.12052	7.86985	3.55071e-15	4.41069e-14
CTNNA3	43.8326	0.902029	0.313486	2.87741	0.00400954	0.0126562
CTNNB1	18417.8	-0.732691	0.0650493	-11.2636	1.98436e-29	4.72733e-28
CTNNBIP1	1303.72	0.733749	0.0956047	7.67482	1.65647e-14	1.96585e-13
CTNND1	7998.42	0.241814	0.079664	3.03542	0.00240198	0.00800119
CTPS2	1264.01	-0.544058	0.0934837	-5.81982	5.89128e-09	4.45601e-08
CTR9	2565	-0.304941	0.0804537	-3.79026	0.000150487	0.000639996
CTSB	2130.09	2.0658	0.0951135	21.7193	1.34929e-104	1.69471e-102
CTSC	8324.12	-1.20872	0.0713344	-16.9444	2.11648e-64	1.28628e-62
CTSD	1309.12	-0.351052	0.126905	-2.76627	0.00567015	0.017302
CTSH	235.278	-1.11575	0.158993	-7.01762	2.25685e-12	2.29833e-11
CTSK	1439.92	1.56564	0.101485	15.4272	1.07415e-53	5.18897e-52
CTSL	1183.5	0.672767	0.0908061	7.40883	1.27419e-13	1.42749e-12
CTSLP2	34.5148	-0.945079	0.346456	-2.72784	0.00637497	0.0191937
CTSO	88.4661	1.2049	0.240572	5.00849	5.48594e-07	3.36844e-06
CTSS	8.87274	2.90177	0.659233	4.40174	1.07386e-05	5.51268e-05
CTSV	1596.51	-0.637618	0.087682	-7.27193	3.54382e-13	3.84078e-12
CTSZ	1118.41	0.561519	0.0911554	6.16002	7.27381e-10	5.98857e-09
CTTNBP2	1103.19	-2.02638	0.105126	-19.2757	8.59979e-83	7.68474e-81
CTXN1	1332.4	0.625066	0.143851	4.34525	1.39119e-05	7.03627e-05
CUBN	24.3876	1.70969	0.417133	4.09867	4.1553e-05	0.000195389
CUEDC1	1341.59	1.5961	0.140997	11.3201	1.044e-29	2.50827e-28
CUEDC2	1130.22	0.379801	0.0953512	3.98318	6.79985e-05	0.000308202
CUL4A	4494.26	-0.206308	0.0779171	-2.64779	0.00810194	0.0237251
CUL7	1303.95	0.949204	0.0899065	10.5577	4.68085e-26	9.88093e-25
CUL9	486.011	0.590201	0.131294	4.49528	6.9479e-06	3.6615e-05
CUTC	528.231	-0.699556	0.110774	-6.31515	2.69904e-10	2.32192e-09
CUX1	1875.09	0.443739	0.0875892	5.06614	4.05959e-07	2.52765e-06
CUX2	167.591	-0.939591	0.174827	-5.37442	7.68307e-08	5.19124e-07
CUZD1	154.985	-6.94388	0.470114	-14.7706	2.2654e-49	9.68169e-48
CWC22	1778.93	-0.323699	0.100691	-3.21476	0.00130552	0.00462694
CWC27	1499.46	-0.38483	0.0950626	-4.04817	5.16201e-05	0.000239047
CXADR	2925.57	-0.547765	0.0956963	-5.72399	1.0405e-08	7.70257e-08
CXCL12	1307.67	-1.80826	0.510665	-3.541	0.000398619	0.00156404
CXCL14	116.316	3.47949	0.54919	6.33568	2.36298e-10	2.0484e-09
CXCL3	27.02	-2.37812	0.425906	-5.58368	2.35479e-08	1.6794e-07
CXCL5	97.0806	-4.89785	0.351742	-13.9245	4.49432e-44	1.69629e-42
CXCL6	40.5593	-4.26124	0.454536	-9.37491	6.92376e-21	1.1796e-19
CXCR4	1618.79	6.7566	0.441829	15.2924	8.59828e-53	4.07526e-51
CXorf23	255.319	-0.38602	0.142733	-2.70449	0.00684099	0.0204335
CXorf57	200.067	1.30548	0.182875	7.13865	9.42527e-13	9.89719e-12
CYB561	672.2	-0.781312	0.111084	-7.0335	2.0141e-12	2.05761e-11
CYB5A	817.086	-1.37105	0.105334	-13.0162	9.89623e-39	3.20996e-37
CYB5D2	264.282	0.5369	0.168015	3.19555	0.00139564	0.00491011
CYB5R2	550.444	-0.962126	0.136547	-7.0461	1.84005e-12	1.8849e-11
CYB5R3	3186.46	0.25248	0.0984821	2.56371	0.010356	0.0294317
CYB5R4	377.558	0.372467	0.131143	2.84016	0.00450915	0.0140805
CYBA	827.786	-0.617237	0.137111	-4.50175	6.73969e-06	3.55758e-05
CYCS	5768.34	-0.39319	0.0976348	-4.02715	5.64561e-05	0.000259774
CYCSP45	4.97559	-2.87595	0.707982	-4.06217	4.86178e-05	0.00022593
CYFIP1	3336.62	0.430712	0.0743511	5.79294	6.91636e-09	5.19485e-08
CYFIP2	1770.45	-0.770306	0.109126	-7.0589	1.67825e-12	1.72698e-11
CYLD	396.869	-0.883101	0.1508	-5.85609	4.73885e-09	3.61701e-08
CYP1B1	825.032	4.47872	0.184181	24.3169	1.29889e-130	2.50985e-128
CYP1B1-AS1	222.841	-3.41334	0.213299	-16.0026	1.2254e-57	6.45779e-56
CYP26A1	444.837	1.17318	0.157174	7.46424	8.37788e-14	9.50362e-13
CYP27B1	76.2822	1.00407	0.273626	3.66948	0.000243045	0.000991391
CYP27C1	177.048	0.718474	0.182453	3.93786	8.22101e-05	0.000366878
CYP2A13	26.2479	-4.07747	0.52429	-7.77713	7.41889e-15	9.00302e-14
CYP2A6	6.71974	-1.96564	0.63778	-3.082	0.00205616	0.0069542
CYP2B6	14.0598	-4.05786	0.628571	-6.45569	1.0773e-10	9.61532e-10
CYP2D6	62.7577	0.907719	0.27879	3.25593	0.00113023	0.00406301
CYP2D7	34.6121	1.19847	0.402925	2.97442	0.00293544	0.00956674
CYP2J2	33.0477	-2.94868	0.412427	-7.14958	8.70447e-13	9.17011e-12
CYP2R1	293.684	-0.359173	0.144594	-2.48402	0.0129909	0.035878
CYP2S1	2901.41	-3.85599	0.111064	-34.7187	4.11405e-264	3.87543e-261
CYP4V2	204.124	0.460214	0.164881	2.79119	0.00525149	0.0161597
CYP4X1	70.9163	-2.81413	0.29456	-9.55366	1.25193e-21	2.20262e-20
CYP7B1	58.8862	0.754998	0.28523	2.64698	0.00812134	0.0237771
CYR61	825.937	0.869403	0.145179	5.98849	2.11801e-09	1.66553e-08
CYS1	4.86701	2.72786	0.710072	3.84166	0.000122204	0.00052856
CYTH1	548.567	0.476953	0.108621	4.39099	1.12836e-05	5.78456e-05
CYYR1	1505.37	1.29249	0.104516	12.3664	3.97312e-35	1.13846e-33
D21S2088E	1086.83	-0.430385	0.151965	-2.83214	0.00462383	0.0144028
D2HGDH	212.703	0.612551	0.187938	3.25933	0.00111677	0.004021
DAAM2	191.917	1.05108	0.166193	6.32443	2.54174e-10	2.19243e-09
DAB2	473.144	0.730817	0.131006	5.5785	2.42601e-08	1.72693e-07
DAB2IP	2465.18	0.375277	0.107191	3.50101	0.000463502	0.00179525
DACH1	859.697	8.20588	0.351992	23.3127	3.29515e-120	5.39831e-118
DACT1	2205.03	5.78647	0.172426	33.5592	6.62055e-247	4.40228e-244
DACT3	149.089	1.69619	0.210228	8.06832	7.12697e-16	9.2389e-15
DAG1	6590.38	-0.22351	0.0922372	-2.42321	0.0153839	0.0417125
DANCR	2542.12	-0.859311	0.0868945	-9.88914	4.64012e-23	8.66258e-22
DAP	1657.85	0.74888	0.0926694	8.0812	6.41316e-16	8.3279e-15
DAPK1	4843.61	0.203569	0.0817422	2.49038	0.0127606	0.0353327
DAPK3	1281.7	0.27486	0.106665	2.57685	0.0099706	0.0285013
DARS	2716.45	-0.273192	0.106731	-2.55962	0.0104786	0.0297388
DARS2	2989.76	-0.457688	0.0847053	-5.4033	6.54277e-08	4.45539e-07
DAZAP1	4875.37	-0.613335	0.0734454	-8.3509	6.77465e-17	9.22102e-16
DAZAP2	785.136	0.875292	0.120545	7.26112	3.83909e-13	4.14886e-12
DAZL	178.898	-1.23295	0.263944	-4.67127	2.99346e-06	1.66281e-05
DBF4	2303.11	-0.321118	0.114021	-2.8163	0.00485798	0.0150533
DBI	4038.28	-0.270742	0.0901645	-3.00276	0.00267547	0.00880144
DBNDD1	309.235	-1.5956	0.14276	-11.1768	5.2957e-29	1.23555e-27
DBNDD2	15.1858	-1.13263	0.48178	-2.35093	0.0187263	0.0493662
DBP	140.608	-1.4272	0.209532	-6.81136	9.66786e-12	9.36064e-11
DBT	785.154	-0.407751	0.114713	-3.55455	0.000378634	0.00149366
DCAF1	1780.2	-0.223609	0.0891596	-2.50796	0.0121429	0.0338503
DCAF12	2119.8	0.505202	0.0927504	5.44689	5.1257e-08	3.53191e-07
DCAF12L1	107.949	-1.17325	0.211666	-5.54292	2.97461e-08	2.10222e-07
DCAF13	3681.52	-0.249541	0.0867458	-2.8767	0.0040186	0.0126765
DCAF17	1115.31	-0.4251	0.110102	-3.86095	0.000112948	0.000492103
DCAF4	420.865	-0.613007	0.121807	-5.03262	4.83815e-07	2.98773e-06
DCAF5	1853.46	0.440558	0.0832404	5.2926	1.20587e-07	7.96909e-07
DCAKD	655.518	0.527888	0.105625	4.99774	5.80051e-07	3.54522e-06
DCBLD1	456.008	0.444608	0.144955	3.06722	0.00216059	0.00726994
DCC	57.3866	0.7664	0.284535	2.69352	0.0070702	0.0210347
DCDC1	28.0279	1.69776	0.427549	3.97092	7.15967e-05	0.000323102
DCDC2	7.60073	1.75687	0.657094	2.6737	0.00750193	0.0221652
DCHS1	1899.83	1.22745	0.104627	11.7317	8.76891e-32	2.2631e-30
DCLK1	530.12	-0.652521	0.156411	-4.17184	3.02144e-05	0.000145431
DCLK2	106.494	2.92536	0.298025	9.81581	9.62624e-23	1.77802e-21
DCLK3	16.862	-1.95846	0.481423	-4.06807	4.74047e-05	0.000220656
DCLRE1A	946.925	0.292263	0.108142	2.70257	0.00688057	0.02053
DCLRE1B	701.365	0.963859	0.10797	8.9271	4.37327e-19	6.79992e-18
DCP1A	1060.04	0.321285	0.0906702	3.54345	0.000394933	0.00155173
DCTN2	2786.69	0.38029	0.0760023	5.00367	5.62494e-07	3.44537e-06
DCTN3	584.685	0.500849	0.111439	4.49438	6.97732e-06	3.67529e-05
DCTN5	3563.08	0.218489	0.0737721	2.96167	0.00305976	0.00991472
DCUN1D1	1273.89	-0.450682	0.114946	-3.9208	8.82543e-05	0.000392226
DCUN1D4	2166.91	0.255358	0.0899675	2.83833	0.00453497	0.0141553
DCUN1D5	1754.04	-0.813234	0.100428	-8.09767	5.60218e-16	7.30837e-15
DCXR	641.073	0.840516	0.114475	7.34238	2.09836e-13	2.31187e-12
DDAH2	2807.14	1.08655	0.087406	12.4311	1.77224e-35	5.1566e-34
DDHD2	1081.17	1.28468	0.13388	9.5958	8.32682e-22	1.47303e-20
DDIT4	163.574	1.26478	0.194674	6.49693	8.1975e-11	7.39247e-10
DDIT4L	40.0863	-1.51818	0.34852	-4.35609	1.32403e-05	6.72216e-05
DDN	7.15543	1.82832	0.625886	2.92117	0.0034872	0.0111559
DDR1	3982.15	-1.14476	0.0999675	-11.4514	2.31491e-30	5.63959e-29
DDR2	1066.91	1.06649	0.276395	3.85856	0.000114058	0.00049638
DDRGK1	851.661	-0.32656	0.111222	-2.9361	0.00332365	0.010681
DDT	101.138	-0.763263	0.212667	-3.58901	0.000331934	0.00132259
DDX10	1835.65	0.373555	0.120308	3.105	0.0019028	0.00649729
DDX11	4176.61	-0.230274	0.0947097	-2.43136	0.0150422	0.0408792
DDX11L2	50.8563	0.730102	0.299413	2.43844	0.0147508	0.0401838
DDX18	5611.3	-0.240693	0.0900073	-2.67415	0.0074918	0.0221405
DDX21	9606.94	-0.248875	0.0894005	-2.78382	0.00537228	0.0164888
DDX25	211.306	-2.12057	0.19305	-10.9845	4.53552e-28	1.02642e-26
DDX27	2154.35	-0.309989	0.0807788	-3.8375	0.000124292	0.000536666
DDX28	584.691	-0.520007	0.112137	-4.63727	3.53047e-06	1.93824e-05
DDX39B	4155.36	-0.280664	0.105232	-2.6671	0.00765087	0.0225399
DDX3X	13328.5	-0.204831	0.0676009	-3.03	0.00244553	0.00813306
DDX52	2267.51	-0.278729	0.0919774	-3.03041	0.00244222	0.00812443
DDX55	1333.29	-0.343452	0.0882412	-3.89219	9.93436e-05	0.000436957
DDX58	193.326	-0.508925	0.163173	-3.11893	0.00181511	0.00622511
DEDD	1255.21	-0.28659	0.0870064	-3.2939	0.000988083	0.00360242
DEDD2	632.269	-0.541761	0.111424	-4.86218	1.16102e-06	6.8444e-06
DEF6	116.764	-1.23298	0.209249	-5.89241	3.80597e-09	2.92971e-08
DEGS1	1667.66	0.236405	0.093484	2.52883	0.0114444	0.0321132
DENND1A	821.358	-0.256127	0.107814	-2.37563	0.0175189	0.0466454
DENND1C	47.0633	-3.10025	0.358955	-8.63688	5.77693e-18	8.41526e-17
DENND2A	599.06	0.575203	0.111866	5.14188	2.72e-07	1.7327e-06
DENND4A	243.076	0.40371	0.149541	2.69966	0.00694094	0.0206965
DENND4B	3276.39	-0.627783	0.106056	-5.91936	3.23195e-09	2.49805e-08
DENND5A	2842.73	0.664285	0.0925104	7.18064	6.93839e-13	7.38179e-12
DENND6A	601.767	0.606749	0.124369	4.87862	1.0683e-06	6.32253e-06
DENND6B	112.19	1.81508	0.249388	7.27811	3.38523e-13	3.67242e-12
DEPDC5	639.654	0.470944	0.115165	4.08929	4.3269e-05	0.000202867
DEPDC7	194.082	-0.835398	0.162754	-5.13288	2.85339e-07	1.81461e-06
DERA	1067.65	0.349651	0.09007	3.88199	0.000103606	0.000454025
DERL3	397.164	-0.430566	0.158457	-2.71724	0.00658286	0.0197486
DES	252.66	3.00832	0.211346	14.2341	5.63097e-46	2.25718e-44
DESI1	1265.3	-0.330989	0.102059	-3.2431	0.00118235	0.0042322
DESI2	2614.87	-0.241084	0.0976024	-2.47006	0.0135092	0.0371687
DET1	303.261	0.859376	0.137387	6.25513	3.97197e-10	3.33946e-09
DFFA	2216.69	-0.227071	0.0961051	-2.36274	0.0181404	0.0480569
DFFB	175.569	-0.509149	0.167468	-3.04027	0.00236367	0.007891
DFNA5	159.243	1.2178	0.178211	6.8335	8.28677e-12	8.0788e-11
DGAT2	37.4879	-1.30887	0.353538	-3.70221	0.000213728	0.000882066
DGCR2	3144.98	0.294689	0.08759	3.36441	0.000767076	0.00285043
DGCR6L	545.869	-0.483189	0.141211	-3.42176	0.00062218	0.0023534
DGKA	168.827	-0.734242	0.17848	-4.11386	3.891e-05	0.000183726
DGKB	91.2002	-6.25733	0.486461	-12.863	7.27215e-38	2.28029e-36
DGKD	1308.11	0.700991	0.111941	6.26213	3.79765e-10	3.20363e-09
DGKE	263.74	-0.403449	0.158473	-2.54586	0.010901	0.0307256
DGKH	252.098	0.425213	0.160751	2.64516	0.0081652	0.023887
DGKK	117.129	-3.1044	0.269089	-11.5367	8.61479e-31	2.1379e-29
DGKZ	2433.05	-0.367646	0.114606	-3.2079	0.00133707	0.00472836
DHCR7	4689.42	0.237026	0.0856089	2.76871	0.00562785	0.0171938
DHFR	7557.64	-0.265047	0.0807816	-3.28103	0.00103429	0.00375153
DHPS	1317.58	0.254702	0.0924825	2.75405	0.00588622	0.0178889
DHRS11	536.877	-0.564777	0.116288	-4.8567	1.19361e-06	7.02187e-06
DHRS3	164.195	-0.662806	0.227921	-2.90806	0.00363682	0.0115939
DHRS4-AS1	368.076	0.430539	0.133857	3.21641	0.00129806	0.00460503
DHX15	10676.2	-0.198711	0.0766402	-2.59278	0.00952046	0.0273806
DHX29	2325.27	-0.478239	0.08795	-5.43763	5.39947e-08	3.71489e-07
DHX33	3163.6	-0.418391	0.0748564	-5.58925	2.28057e-08	1.62801e-07
DHX34	1466.38	-0.354446	0.104225	-3.40078	0.000671927	0.00252887
DHX40	2203.58	0.438606	0.0857433	5.11534	3.13168e-07	1.98211e-06
DHX58	19.0931	-1.32289	0.439868	-3.00747	0.0026343	0.00868168
DIAPH2	348.942	-1.17581	0.183051	-6.42343	1.33237e-10	1.17895e-09
DIO2	13.6555	1.55972	0.538226	2.89789	0.00375684	0.0119357
DIO3	43.7148	4.48323	0.486373	9.21768	3.03602e-20	5.01376e-19
DIO3OS	46.6545	4.02224	0.42873	9.38176	6.48804e-21	1.1087e-19
DIP2A	1354.75	0.506356	0.0951519	5.32155	1.02886e-07	6.84536e-07
DIP2B	1873.41	0.250841	0.0816514	3.0721	0.00212558	0.00716492
DIP2C	723.95	0.604568	0.111972	5.39928	6.69099e-08	4.55221e-07
DIRAS1	540.748	-0.622103	0.11115	-5.59698	2.18113e-08	1.56048e-07
DIRAS2	4.05505	2.16717	0.706967	3.06545	0.0021734	0.00730649
DIRAS3	17.8654	3.96027	0.598339	6.61877	3.62202e-11	3.3629e-10
DIS3L	1043.8	-0.260687	0.0902456	-2.88863	0.00386919	0.0122479
DISC1	133.429	1.23017	0.193578	6.35492	2.08534e-10	1.81607e-09
DISP2	50.969	-0.955604	0.284376	-3.36035	0.000778441	0.00288982
DISP3	183.986	-0.515226	0.17348	-2.96994	0.00297853	0.00968483
DIXDC1	1229.67	0.903604	0.124189	7.27602	3.43815e-13	3.72804e-12
DKC1	5197.83	-0.279933	0.0712817	-3.92714	8.59621e-05	0.000382565
DKFZP434L187	28.2641	2.04007	0.41865	4.87296	1.09937e-06	6.49795e-06
DKK1	1842.83	9.38117	0.39339	23.847	1.08868e-125	1.93802e-123
DKK2	108.428	3.80986	0.341962	11.1412	7.90496e-29	1.8311e-27
DKKL1	49.4046	0.69587	0.288098	2.4154	0.0157181	0.0424813
DLC1	882.714	4.78393	0.165936	28.8299	9.06161e-183	3.79379e-180
DLEU7	95.7381	-1.8393	0.238237	-7.72046	1.1591e-14	1.39388e-13
DLG1	2814.09	0.62191	0.0999403	6.22281	4.88324e-10	4.07081e-09
DLG5	2921.65	-0.360939	0.103963	-3.47181	0.000516958	0.00198495
DLG5-AS1	24.553	-2.04841	0.417832	-4.90246	9.46426e-07	5.62038e-06
DLGAP1	202.887	-1.39609	0.177385	-7.87039	3.53525e-15	4.3939e-14
DLGAP1-AS2	304.065	-1.18257	0.221373	-5.34196	9.19482e-08	6.16113e-07
DLGAP2	32.3346	-2.11924	0.410106	-5.16754	2.372e-07	1.52174e-06
DLL1	855.856	5.44917	0.490738	11.104	1.19926e-28	2.75257e-27
DLL3	1857.48	4.9429	0.296942	16.646	3.2348e-62	1.87039e-60
DLX1	5.42822	1.73027	0.67371	2.56827	0.0102207	0.0290983
DLX3	73.1869	4.32972	0.378628	11.4353	2.78566e-30	6.77185e-29
DLX4	15.8479	2.14668	0.517306	4.14972	3.3288e-05	0.000159208
DMD	755.322	2.01128	0.135521	14.841	7.95349e-50	3.4646e-48
DMKN	1672.01	-1.97642	0.104676	-18.8813	1.62386e-79	1.35469e-77
DMP1	4.44922	-2.74532	0.710916	-3.86167	0.000112615	0.000490843
DMPK	997.466	1.12699	0.130241	8.65315	5.0096e-18	7.32581e-17
DMRT1	9.13022	-2.26093	0.627804	-3.60133	0.000316588	0.00126658
DMRT2	27.9139	5.06675	0.618389	8.19347	2.53809e-16	3.37336e-15
DMTN	166.548	6.25939	0.412133	15.1878	4.26177e-52	1.96633e-50
DMWD	965.195	0.705423	0.112249	6.28446	3.29e-10	2.79625e-09
DMXL1	722.528	-0.389686	0.121314	-3.2122	0.00131721	0.0046647
DMXL2	1053.49	1.28008	0.119412	10.7198	8.21774e-27	1.77447e-25
DNA2	2427.9	-0.279326	0.0992665	-2.8139	0.00489442	0.0151559
DNAAF2	1340.53	-0.21375	0.0907671	-2.35492	0.0185265	0.0489079
DNAH1	79.6575	0.834489	0.271302	3.07586	0.00209893	0.00708566
DNAH10OS	11.0984	1.9986	0.572025	3.4939	0.000476016	0.00183962
DNAH12	3.60015	1.92798	0.713703	2.70138	0.00690524	0.0205927
DNAH5	81.6104	1.75999	0.384444	4.578	4.69433e-06	2.5299e-05
DNAH6	12.6413	1.79652	0.528533	3.39908	0.000676134	0.00254343
DNAH7	40.6878	2.42187	0.426182	5.68272	1.3257e-08	9.71838e-08
DNAH9	123.217	1.93577	0.226932	8.53017	1.46139e-17	2.06882e-16
DNAI1	18.4549	1.47169	0.483178	3.04584	0.0023203	0.00776132
DNAJA2	2441.32	-0.399777	0.0902293	-4.43068	9.39347e-06	4.8519e-05
DNAJA3	1903.11	-0.313084	0.0836094	-3.7446	0.000180684	0.000756323
DNAJB1	2730.81	0.229555	0.0933918	2.45798	0.013972	0.0383488
DNAJB13	6.26088	1.5643	0.654618	2.38963	0.0168652	0.0451709
DNAJB2	973.941	0.310978	0.0972407	3.19803	0.00138372	0.00487655
DNAJB5	1782.43	-0.687703	0.0811777	-8.47157	2.42097e-17	3.38446e-16
DNAJB6	3619.72	-0.463401	0.0758046	-6.1131	9.77163e-10	7.93239e-09
DNAJC11	2261.29	-0.307799	0.0825165	-3.73015	0.000191364	0.000796719
DNAJC14	580.692	0.331994	0.108739	3.05312	0.00226476	0.00759107
DNAJC15	230.897	5.12499	0.27755	18.4651	3.94027e-76	3.10389e-74
DNAJC16	681.252	0.260852	0.103947	2.50948	0.012091	0.0337389
DNAJC19	896.909	-0.434352	0.103797	-4.18465	2.85606e-05	0.000137911
DNAJC2	2089.9	-0.467471	0.0880606	-5.30852	1.10521e-07	7.33175e-07
DNAJC21	1596.11	-0.237797	0.0840166	-2.83036	0.00464953	0.0144758
DNAJC27	196.492	0.522598	0.169422	3.08458	0.00203837	0.00689874
DNAJC28	69.1681	-0.936602	0.263927	-3.54872	0.000387114	0.00152518
DNAJC3	1010.07	0.260731	0.104848	2.48675	0.0128917	0.0356302
DNAJC6	101.927	-1.45834	0.215187	-6.77707	1.22638e-11	1.17583e-10
DNAJC9	872.042	0.53917	0.100259	5.37779	7.54056e-08	5.10105e-07
DNAL1	447.84	0.416579	0.155487	2.67919	0.00738001	0.0218358
DNAL4	311.47	0.541085	0.136099	3.97566	7.01855e-05	0.000317414
DNALI1	694.049	0.767412	0.147742	5.19426	2.05532e-07	1.32648e-06
DNASE1	455.521	0.455759	0.118731	3.8386	0.000123738	0.000534479
DNASE2	125.481	-1.63339	0.205976	-7.93	2.19146e-15	2.76015e-14
DNM3	68.0573	1.25674	0.265354	4.73608	2.17889e-06	1.23676e-05
DNMBP	1243.6	-0.633899	0.094497	-6.70814	1.97127e-11	1.85926e-10
DNMT3A	4345.38	-0.652289	0.0728189	-8.95768	3.3159e-19	5.18795e-18
DNMT3B	15226.5	-2.16586	0.0745945	-29.0351	2.37195e-185	1.03125e-182
[truncated: 6,589 more rows]

## Sheet: |log2FC|>1
GENE_NAME	baseMean	log2FoldChange	lfcSE	stat	pvalue	padj
A2M	18.9595	1.10755	0.464173	2.38607	0.0170297	0.0455253
A2ML1	25.1755	-3.77407	0.502363	-7.51264	5.7948e-14	6.64345e-13
A4GALT	99.7563	1.28328	0.299364	4.2867	1.81351e-05	9.01887e-05
ABALON	25.5909	1.06289	0.390765	2.72002	0.00652782	0.019611
ABCA1	915.505	-3.18733	0.168695	-18.894	1.27769e-79	1.06985e-77
ABCA5	53.9187	1.09025	0.288368	3.78075	0.000156358	0.000663343
ABCA9	16.365	3.40217	0.571676	5.95121	2.6617e-09	2.07502e-08
ABCB1	79.1691	2.8176	0.293822	9.58949	8.85255e-22	1.56236e-20
ABCB4	119.933	2.68844	0.246978	10.8853	1.35383e-27	3.00957e-26
ABCC3	13.7676	-1.68081	0.511091	-3.28866	0.00100664	0.00366063
ABCC6	24.8886	1.15691	0.404858	2.85756	0.00426917	0.0133996
ABCD2	9.39759	3.03108	0.645844	4.69321	2.68952e-06	1.50432e-05
ABCG1	323.793	1.37396	0.421469	3.25993	0.0011144	0.00401314
ABCG2	77.9536	3.59016	0.334241	10.7412	6.51815e-27	1.41694e-25
ABHD12B	31.0932	-2.28665	0.394374	-5.79817	6.70405e-09	5.04544e-08
ABHD14A	47.6358	1.50103	0.323467	4.64045	3.47657e-06	1.91004e-05
ABHD3	266.702	1.04435	0.183846	5.68059	1.34229e-08	9.8272e-08
ABHD4	1355	-1.09838	0.121534	-9.03763	1.60101e-19	2.54899e-18
ABLIM1	4257.27	1.06381	0.108385	9.81512	9.69236e-23	1.78878e-21
ABLIM2	22.4358	-1.38532	0.427862	-3.23778	0.00120465	0.00430111
ABTB2	443.386	-1.32262	0.437232	-3.02499	0.00248645	0.00825215
AC002454.1	9.70326	1.56611	0.575335	2.72208	0.00648725	0.0195084
AC002480.3	15.1168	1.37096	0.490796	2.79334	0.00521674	0.0160594
AC004540.4	15.2479	1.24146	0.479199	2.59069	0.00957838	0.0275196
AC005152.3	13.2274	2.47888	0.588805	4.21001	2.55355e-05	0.000124055
AC005276.1	39.5125	-1.82371	0.356559	-5.11476	3.14134e-07	1.98767e-06
AC005301.9	19.6329	-2.05768	0.462085	-4.45302	8.46698e-06	4.40454e-05
AC005307.1	17.8563	-2.02402	0.472751	-4.28136	1.85754e-05	9.22364e-05
AC005329.7	10.5007	1.65294	0.596202	2.77245	0.00556356	0.0170158
AC005355.1	5.73732	-2.585	0.683795	-3.78037	0.000156595	0.00066412
AC005682.5	62.8635	-2.19546	0.305379	-7.1893	6.51229e-13	6.9448e-12
AC005863.1	2.74168	-1.96011	0.713495	-2.74719	0.00601076	0.0182062
AC007250.4	7.24539	-2.8837	0.661475	-4.3595	1.3036e-05	6.62883e-05
AC007277.3	96.6757	6.68569	0.558675	11.967	5.28826e-33	1.4132e-31
AC007383.3	36.5304	-1.95995	0.357189	-5.48714	4.08484e-08	2.84592e-07
AC007405.4	25.0672	3.5493	0.506968	7.00103	2.54089e-12	2.57367e-11
AC007405.6	123.014	2.46279	0.241722	10.1885	2.23187e-24	4.39531e-23
AC007405.8	32.7166	5.3016	0.606737	8.7379	2.37492e-18	3.52542e-17
AC007461.2	3.12149	2.14115	0.716813	2.98704	0.00281693	0.00922572
AC007463.2	4.30495	-2.71101	0.711554	-3.80999	0.000138974	0.000595064
AC007682.1	17.9273	4.22059	0.615142	6.86116	6.83038e-12	6.6936e-11
AC007743.1	93.5598	1.12001	0.25233	4.43866	9.05211e-06	4.68522e-05
AC008088.4	35.8085	-1.37169	0.386834	-3.54593	0.000391227	0.00153877
AC009014.3	12.8353	1.66752	0.706835	2.35914	0.0183176	0.0484355
AC009133.17	84.1403	-2.33906	0.253035	-9.24404	2.3737e-20	3.94013e-19
AC009166.5	15.2828	2.28037	0.529732	4.30477	1.6716e-05	8.35724e-05
AC009166.7	15.2431	3.2971	0.582439	5.66086	1.50619e-08	1.09774e-07
AC009299.3	8.5342	-2.44317	0.620029	-3.94041	8.13417e-05	0.000363433
AC009336.19	46.5395	5.6392	0.601203	9.37986	6.6058e-21	1.12715e-19
AC009948.5	256.046	1.04954	0.172724	6.07643	1.2289e-09	9.90478e-09
AC010980.2	14.3964	3.92771	0.6302	6.23249	4.59082e-10	3.83978e-09
AC011738.4	6.16759	-2.11964	0.657553	-3.22352	0.00126625	0.00450044
AC012512.1	121.618	-1.76065	0.21336	-8.25202	1.55741e-16	2.08713e-15
AC012531.25	47.0531	5.67203	0.598888	9.47094	2.77333e-21	4.81563e-20
AC016723.4	2.88722	-2.14335	0.716478	-2.99152	0.00277597	0.00909948
AC027612.4	56.4472	-2.57332	0.350626	-7.3392	2.14872e-13	2.35931e-12
AC069154.4	1.97371	-1.70776	0.706327	-2.41781	0.0156144	0.0422412
AC074289.1	294.701	-3.52131	0.183549	-19.1845	4.98482e-82	4.36809e-80
AC074363.1	13.8857	-1.9707	0.520554	-3.78577	0.000153233	0.000650937
AC078941.1	4.38864	-1.86702	0.692648	-2.69548	0.00702883	0.0209227
AC087073.1	4.99309	2.60853	0.713274	3.65712	0.000255063	0.0010362
AC091493.2	33.7082	-1.7769	0.416113	-4.27024	1.95266e-05	9.65778e-05
AC092198.1	46.5742	1.63209	0.342292	4.76812	1.85957e-06	1.06514e-05
AC093620.5	4.15277	2.19648	0.706827	3.10753	0.00188661	0.00644297
AC093627.7	5.20859	-2.97214	0.704912	-4.21633	2.48313e-05	0.000121066
AC093642.5	11.9302	-1.4423	0.526011	-2.74195	0.00610754	0.0184672
AC093673.5	210.861	-1.20433	0.178478	-6.74779	1.50114e-11	1.43016e-10
AC093818.1	40.5903	-1.60849	0.327098	-4.91747	8.76703e-07	5.2283e-06
AC098614.2	15.2035	-1.41348	0.497128	-2.8433	0.00446493	0.0139559
AC100830.5	5.85046	-1.68129	0.655544	-2.56473	0.0103258	0.0293567
AC104304.4	12.5943	-4.21485	0.656267	-6.42246	1.34086e-10	1.18554e-09
AC106875.1	12.9729	-2.03267	0.551516	-3.68561	0.000228152	0.000936467
AC108142.1	203.276	-1.61502	0.174255	-9.26812	1.89462e-20	3.16583e-19
AC109642.1	18.0806	-3.30312	0.538952	-6.12877	8.85586e-10	7.22791e-09
AC114877.3	9.3967	-1.48078	0.590256	-2.5087	0.0121177	0.0338009
AC116614.1	80.3761	-3.49057	0.311749	-11.1967	4.23065e-29	9.94248e-28
AC141928.1	629.686	6.22521	0.234803	26.5125	6.95678e-155	1.82882e-152
AC144450.1	9.7164	-1.94921	0.621185	-3.13788	0.00170173	0.00587729
AC144450.2	14.674	-1.88815	0.519225	-3.63648	0.000276393	0.0011161
AC156455.1	32.2917	-1.07641	0.360889	-2.98266	0.00285759	0.00934263
AC159540.1	136.878	1.01347	0.201231	5.03633	4.74553e-07	2.93454e-06
AC226118.1	17.2791	-1.64907	0.490021	-3.36531	0.000764578	0.00284209
ACAD8	1648.12	-1.07595	0.0897852	-11.9836	4.32935e-33	1.15969e-31
ACAN	38.4998	2.23647	0.38835	5.7589	8.46631e-09	6.3233e-08
ACAP1	139.684	-1.87643	0.200382	-9.36429	7.65651e-21	1.30149e-19
ACBD4	104.26	-1.43763	0.240319	-5.98218	2.20167e-09	1.72831e-08
ACE	21.5724	-1.1537	0.43341	-2.66191	0.00776986	0.0228606
ACKR3	136.637	1.63869	0.206049	7.9529	1.82195e-15	2.30115e-14
ACO1	2138.59	-1.13948	0.0863616	-13.1943	9.46102e-40	3.15945e-38
ACOT12	73.9565	4.79476	0.409265	11.7155	1.06133e-31	2.73286e-30
ACOXL	69.8593	-3.26138	0.326562	-9.98702	1.73721e-23	3.30041e-22
ACPP	20.0774	1.47573	0.496789	2.97054	0.00297275	0.00967158
ACSBG1	49.2347	-1.52952	0.318775	-4.79813	1.60152e-06	9.27199e-06
ACSL6	29.9503	1.07747	0.377202	2.85648	0.00428365	0.0134432
ACTA1	131.102	4.35911	0.3109	14.0209	1.16104e-44	4.44896e-43
ACTA2	559.984	4.96283	0.180369	27.5149	1.16361e-166	3.60368e-164
ACTC1	899.279	1.55049	0.15132	10.2464	1.22789e-24	2.4523e-23
ACTG2	397.099	1.01532	0.189702	5.35219	8.68974e-08	5.84e-07
ACTL6B	11.3166	-2.61881	0.57858	-4.52626	6.00357e-06	3.18463e-05
ACTL8	206.705	-1.87986	0.180909	-10.3912	2.71954e-25	5.55406e-24
ACTN2	47.1695	-1.36233	0.318617	-4.27576	1.90487e-05	9.44415e-05
ACTN3	388.287	-1.59836	0.179876	-8.8859	6.34055e-19	9.7515e-18
ACTRT3	65.8684	-1.56766	0.271489	-5.7743	7.72752e-09	5.79256e-08
ACVR2B-AS1	85.0587	-1.18887	0.255159	-4.65932	3.17263e-06	1.75321e-05
ADA	428.75	-1.26673	0.121467	-10.4285	1.83699e-25	3.77551e-24
ADAD2	3.0401	-2.24031	0.716876	-3.1251	0.00177746	0.00611082
ADAM12	79.7084	1.33224	0.281544	4.7319	2.22429e-06	1.26064e-05
ADAM28	6.40306	-1.97258	0.657861	-2.99848	0.00271331	0.00891347
ADAMTS14	28.7713	-2.21179	0.406756	-5.43764	5.39911e-08	3.71489e-07
ADAMTS15	723.518	3.1741	0.154314	20.5691	5.19406e-94	5.48726e-92
ADAMTS17	320.828	2.88078	0.155501	18.5258	1.27906e-76	1.02181e-74
ADAMTS4	566.233	-1.42277	0.136148	-10.4502	1.46251e-25	3.02235e-24
ADAMTS5	22.2947	-3.49857	0.506048	-6.9135	4.72838e-12	4.71129e-11
ADAMTS8	284.04	-6.08504	0.292245	-20.8217	2.74973e-96	3.00319e-94
ADAMTS9	180.011	1.8063	0.17894	10.0945	5.84513e-24	1.13528e-22
ADAMTSL4	66.3237	-1.25889	0.303822	-4.1435	3.42049e-05	0.000163317
ADARB2	16.8309	-2.08024	0.517878	-4.01685	5.89824e-05	0.000269879
ADCK5	73.5368	1.28086	0.267781	4.78322	1.72507e-06	9.944e-06
ADCY6	2266.28	1.57769	0.255141	6.18359	6.26589e-10	5.18329e-09
ADCY9	198.572	-1.21052	0.177226	-6.83037	8.46979e-12	8.25011e-11
ADCYAP1R1	731.6	-1.52852	0.112753	-13.5563	7.26816e-42	2.55153e-40
ADD2	5012.25	-1.03919	0.08264	-12.5749	2.90032e-36	8.61636e-35
ADGRA2	160.001	-4.34351	0.257138	-16.8917	5.17631e-64	3.1124e-62
ADGRD1	12.8682	-1.73016	0.520532	-3.32383	0.000887914	0.00326194
ADGRD2	6.78083	-1.67014	0.639155	-2.61304	0.00897407	0.0259777
ADGRE5	340.961	1.74877	0.162932	10.7332	7.11252e-27	1.54318e-25
ADGRF3	39.661	-1.0758	0.321741	-3.34369	0.000826728	0.00305303
ADGRF5	49.5528	-3.34852	0.39333	-8.51325	1.69128e-17	2.38233e-16
ADGRG1	82.5705	1.38623	0.307792	4.50377	6.67591e-06	3.52638e-05
ADGRG2	147.157	-4.46164	0.274064	-16.2795	1.37911e-59	7.54937e-58
ADGRG5	153.008	-4.34529	0.262163	-16.5748	1.06093e-61	6.0723e-60
ADGRG6	104.942	1.71233	0.234614	7.29849	2.9101e-13	3.16763e-12
ADGRL3	838.201	1.54121	0.0995195	15.4865	4.27788e-54	2.07542e-52
ADGRL4	121.144	1.29512	0.207677	6.23623	4.48253e-10	3.75615e-09
ADGRV1	1048.11	1.27525	0.306307	4.16331	3.13664e-05	0.000150527
ADM	760.844	-4.04626	0.134744	-30.0293	4.06411e-198	1.95492e-195
ADM2	206.515	-2.04062	0.18627	-10.9552	6.27459e-28	1.4073e-26
ADPRH	152.185	-1.07549	0.178865	-6.01286	1.82277e-09	1.4427e-08
ADRA1D	74.0572	-5.13189	0.421147	-12.1855	3.71282e-34	1.0312e-32
ADRA2C	958.474	4.76742	0.15038	31.7024	1.43796e-220	8.33574e-218
ADRB1	2.91413	2.06847	0.716322	2.88763	0.00388154	0.0122836
AES	1758.15	-1.76401	0.378075	-4.66576	3.07472e-06	1.70417e-05
AF064860.7	14.9388	-1.32496	0.514554	-2.57497	0.010025	0.0286276
AFAP1L2	611.346	3.95726	0.155226	25.4936	2.32213e-143	5.3029e-141
AFF2	188.876	1.27276	0.209492	6.07548	1.23614e-09	9.95958e-09
AFF3	358.532	1.32702	0.142669	9.30139	1.38617e-20	2.33174e-19
AFP	43.0316	-2.32382	0.44389	-5.23513	1.64871e-07	1.0748e-06
AGFG2	122.337	1.02056	0.197515	5.16701	2.37862e-07	1.52556e-06
AGMAT	131.349	-1.20354	0.190688	-6.31155	2.76262e-10	2.3739e-09
AGPAT2	286.683	-1.72414	0.161444	-10.6795	1.27006e-26	2.71908e-25
AGR2	39.2997	3.82871	0.700297	5.46727	4.57017e-08	3.16649e-07
AGRN	7729.54	1.3151	0.127883	10.2836	8.35292e-25	1.67711e-23
AHDC1	1901.36	1.32218	0.120757	10.9491	6.71254e-28	1.50255e-26
AHNAK	1526.03	5.86761	0.281546	20.8407	1.8521e-96	2.04255e-94
AHNAK2	33.3987	1.19868	0.369711	3.24222	0.00118601	0.00424267
AHSG	7.61724	-3.13098	0.674433	-4.64238	3.44411e-06	1.89267e-05
AHSP	12.2532	-2.41539	0.579481	-4.16819	3.07026e-05	0.000147623
AIF1	267.376	-1.5217	0.227744	-6.6816	2.36342e-11	2.21802e-10
AIFM2	162.71	-1.11894	0.248594	-4.50106	6.7614e-06	3.5682e-05
AIM1	31.4762	-1.29053	0.356182	-3.62324	0.000290935	0.00117037
AJ006998.2	8.17124	2.42998	0.667509	3.64036	0.000272253	0.00110115
AJAP1	894.827	1.96824	0.171277	11.4916	1.45472e-30	3.58261e-29
AK3	931.847	1.10924	0.101905	10.885	1.35883e-27	3.01773e-26
AK4	3148.7	-3.5213	0.295532	-11.9151	9.8736e-33	2.61998e-31
AK4P1	19.934	-3.22548	0.511273	-6.30874	2.81323e-10	2.41555e-09
AK5	72.3763	-3.00081	0.289495	-10.3657	3.55228e-25	7.24166e-24
AK8	20.0344	1.22615	0.440339	2.78456	0.00536008	0.0164571
AKAIN1	5.86094	2.41688	0.705887	3.42389	0.000617325	0.00233738
AKAP2	12.6168	-1.69146	0.529955	-3.19169	0.00141441	0.00496767
AKAP6	42.464	1.39614	0.331292	4.21421	2.50657e-05	0.000122078
AKAP7	277.255	-1.42887	0.165197	-8.64953	5.17133e-18	7.55743e-17
AKNA	1568.79	-1.42265	0.139579	-10.1924	2.14295e-24	4.22755e-23
AKR1C3	37.9748	-2.62851	0.378868	-6.93781	3.98238e-12	3.99086e-11
AL132709.1	14.3784	-2.37734	0.531998	-4.4687	7.86978e-06	4.11444e-05
AL133493.2	12.8671	-1.66305	0.524637	-3.1699	0.00152491	0.00532598
AL137860.1	3.56985	-2.09732	0.711295	-2.94859	0.00319227	0.0102998
ALCAM	1121.11	-2.36597	0.108177	-21.8714	4.86902e-106	6.29021e-104
ALDH1A1	18.3688	-4.74977	0.632453	-7.51006	5.90983e-14	6.7719e-13
ALDH1A2	83.0295	4.50632	0.380393	11.8465	2.24392e-32	5.88522e-31
ALK	6.7688	1.51606	0.641645	2.36277	0.0181389	0.0480569
ALKBH2	525.763	-1.00126	0.115912	-8.6381	5.71544e-18	8.33643e-17
ALOX12	62.2623	-1.07033	0.279496	-3.8295	0.000128403	0.000552731
ALOX12P2	193.279	-1.48225	0.181274	-8.17686	2.91335e-16	3.85402e-15
ALOX15	11.2254	-1.58545	0.552556	-2.86931	0.00411371	0.0129585
ALOXE3	18.2347	3.7327	0.586624	6.36302	1.97822e-10	1.72678e-09
ALPK2	75.4618	4.30098	0.369039	11.6545	2.17548e-31	5.51381e-30
ALS2CL	100.807	-2.93749	0.249589	-11.7693	5.61667e-32	1.45788e-30
ALX3	4.17425	2.19624	0.70663	3.10805	0.00188328	0.00643356
ALX4	15.9431	4.26987	0.652884	6.54001	6.15144e-11	5.60548e-10
AMDHD1	12.9343	1.57941	0.553597	2.853	0.00433081	0.0135667
AMER2	10.9583	2.43452	0.596905	4.07857	4.53127e-05	0.000211659
AMHR2	37.2184	1.80582	0.359026	5.02977	4.91064e-07	3.02671e-06
AMOT	1072.53	2.06991	0.111315	18.595	3.52784e-77	2.83834e-75
AMOTL1	6120.36	1.59311	0.0820119	19.4253	4.71673e-84	4.29983e-82
AMOTL2	2658.57	1.6833	0.0995874	16.9027	4.29487e-64	2.59621e-62
AMT	36.638	-1.00965	0.343615	-2.93833	0.00329991	0.0106108
ANGPT1	42.4571	-2.21755	0.345625	-6.41607	1.39835e-10	1.23347e-09
ANGPT2	27.6048	3.96772	0.523669	7.57677	3.54255e-14	4.1135e-13
ANGPT4	38.542	-1.6459	0.348709	-4.71999	2.35861e-06	1.33076e-05
ANGPTL1	43.9835	1.52821	0.400278	3.81788	0.000134604	0.000577773
ANGPTL4	35.1957	-2.30053	0.382973	-6.00704	1.88943e-09	1.4941e-08
ANK1	89.8173	-1.11595	0.239861	-4.6525	3.27941e-06	1.80738e-05
ANKRD1	116.231	3.90009	0.300667	12.9715	1.77624e-38	5.70415e-37
ANKRD18CP	143.349	-4.15685	0.262064	-15.8619	1.16261e-56	5.98733e-55
ANKRD24	138.923	-2.46068	0.212883	-11.5589	6.65779e-31	1.6577e-29
ANKRD33B	340.353	-2.12957	0.142009	-14.996	7.79491e-51	3.45544e-49
ANKRD53	19.3416	2.57329	0.493248	5.21704	1.81807e-07	1.17961e-06
ANKRD65	17.0838	2.14273	0.508849	4.21094	2.54313e-05	0.000123619
ANKRD66	3.28589	1.99615	0.714869	2.79233	0.00523302	0.0161051
ANO3	10.6714	1.46725	0.5744	2.5544	0.0106371	0.0300907
ANO5	195.736	-1.26324	0.18507	-6.82572	8.74861e-12	8.51069e-11
ANO9	121.378	-2.30468	0.221788	-10.3914	2.714e-25	5.54774e-24
ANOS1	1851.72	-1.81261	0.495581	-3.65754	0.000254644	0.00103469
ANOS2P	138.131	-2.14932	0.206666	-10.4	2.48011e-25	5.08343e-24
ANTXR2	981.385	2.09291	0.128435	16.2955	1.06249e-59	5.83029e-58
ANXA1	515.161	3.00397	0.137842	21.7929	2.7114e-105	3.48291e-103
ANXA11	754.762	-1.0364	0.105442	-9.82909	8.43807e-23	1.56239e-21
ANXA2	5390.95	1.0261	0.0957184	10.72	8.19754e-27	1.7718e-25
ANXA9	120.788	-1.29761	0.208672	-6.21842	5.02182e-10	4.17715e-09
AOC3	62.5625	1.48342	0.291143	5.09515	3.48471e-07	2.19144e-06
AP000221.1	35.4292	1.2314	0.356902	3.45026	0.000560049	0.00213662
AP000432.1	27.9165	1.41366	0.394494	3.58348	0.000339046	0.00134926
AP000688.29	120.155	-1.36886	0.218047	-6.27784	3.43314e-10	2.90916e-09
AP000892.6	127.475	3.44153	0.263286	13.0714	4.79435e-39	1.58235e-37
AP001092.4	6.33581	-1.80091	0.641533	-2.80719	0.00499751	0.0154434
AP001258.4	26.447	-2.82465	0.444119	-6.36012	2.01591e-10	1.75764e-09
AP002856.5	65.0935	-1.5498	0.277123	-5.59244	2.23899e-08	1.59934e-07
AP003774.6	24.0171	-1.04794	0.40334	-2.59816	0.00937241	0.0270063
AP1M2	112.779	-1.47709	0.274936	-5.37249	7.76581e-08	5.24558e-07
AP1S3	96.5157	-1.61971	0.226442	-7.15285	8.49964e-13	8.96687e-12
AP5B1	139.182	-1.08332	0.204585	-5.29522	1.18876e-07	7.86062e-07
APC2	29.8985	2.57791	0.43354	5.9462	2.74437e-09	2.13433e-08
APCDD1	4387.59	2.23604	0.356158	6.27823	3.42448e-10	2.90291e-09
APCDD1L	96.3767	-6.01773	0.452342	-13.3035	2.20906e-40	7.52147e-39
APCDD1L-AS1	6.94206	-2.09019	0.657713	-3.17796	0.00148314	0.00519134
APELA	665.197	-3.39073	0.413745	-8.19522	2.50143e-16	3.32661e-15
APLN	154.859	-2.11753	0.251153	-8.43125	3.41992e-17	4.72891e-16
APLNR	8642	3.52976	0.248914	14.1807	1.20721e-45	4.7882e-44
APOBEC3B	58.374	-1.79639	0.283312	-6.34066	2.28787e-10	1.9871e-09
APOBEC3D	32.0062	-2.06411	0.37278	-5.53706	3.07587e-08	2.16904e-07
APOL2	434.703	-1.57308	0.130806	-12.0261	2.5914e-33	6.99121e-32
APOL6	5.04047	-1.90406	0.672097	-2.83301	0.00461117	0.0143693
APOLD1	108.212	1.42504	0.221875	6.42269	1.33883e-10	1.1842e-09
AQP5	9.1744	-1.39368	0.579214	-2.40616	0.0161212	0.0434098
ARAP2	32.0884	-1.75382	0.366019	-4.7916	1.65456e-06	9.55463e-06
ARAP3	2006.56	-1.37875	0.0913277	-15.0968	1.70049e-51	7.75095e-50
ARC	646.055	-2.97323	0.176043	-16.8892	5.39937e-64	3.2379e-62
ARFGEF3	282.597	-4.01082	0.202505	-19.806	2.64137e-87	2.53035e-85
ARHGAP10	140.356	2.46889	0.304659	8.1038	5.3268e-16	6.95313e-15
ARHGAP18	147.29	-1.54723	0.225983	-6.84668	7.55821e-12	7.38763e-11
ARHGAP22	119.04	-1.95164	0.253769	-7.69061	1.46432e-14	1.7433e-13
ARHGAP24	271.382	4.60945	0.268051	17.1962	2.83704e-66	1.78166e-64
ARHGAP29	332.031	3.64619	0.174973	20.8386	1.93312e-96	2.12155e-94
ARHGAP30	68.207	-1.09747	0.25424	-4.31667	1.58402e-05	7.94575e-05
ARHGAP36	3.88657	2.09777	0.709723	2.95577	0.00311894	0.0100762
ARHGAP4	520.54	-2.13891	0.128133	-16.6929	1.4766e-62	8.58175e-61
ARHGAP40	11.5005	-2.41842	0.573883	-4.21414	2.50734e-05	0.000122089
ARHGAP6	54.1017	2.27572	0.315416	7.21497	5.39465e-13	5.79117e-12
ARHGAP8	14.1815	-2.24261	0.522888	-4.28888	1.79574e-05	8.93836e-05
ARHGAP9	43.1431	-1.52199	0.370014	-4.11334	3.89976e-05	0.000184101
ARHGDIB	23.5183	1.14527	0.439854	2.60375	0.00922112	0.0266145
ARHGEF16	488.334	-1.47369	0.152401	-9.66984	4.05013e-22	7.25557e-21
ARHGEF17	1208.23	1.73195	0.103155	16.7898	2.90048e-63	1.70766e-61
ARHGEF26-AS1	3.75072	1.73144	0.706761	2.44982	0.0142928	0.039139
ARHGEF28	48.1892	3.75753	0.423689	8.86861	7.40665e-19	1.13757e-17
ARHGEF34P	17.6813	-1.39795	0.462848	-3.02034	0.00252495	0.00836765
ARHGEF35	71.1882	-1.82801	0.268843	-6.79956	1.04939e-11	1.013e-10
ARHGEF37	45.4752	1.31324	0.313455	4.18956	2.79497e-05	0.000135192
ARHGEF4	339.797	-1.05812	0.132503	-7.98561	1.39834e-15	1.77904e-14
ARHGEF5	136.728	-1.18675	0.189408	-6.26558	3.71429e-10	3.13565e-09
ARID3A	4465.32	1.85203	0.083807	22.0988	3.24663e-108	4.31764e-106
ARID5B	139.669	1.58712	0.198411	7.99915	1.25279e-15	1.60018e-14
ARL11	24.9468	-1.69037	0.422097	-4.0047	6.20964e-05	0.000283382
ARL4C	933.439	2.29386	0.106994	21.4391	5.77191e-102	6.97814e-100
ARL4D	368.113	1.52825	0.178205	8.5758	9.84016e-18	1.40623e-16
ARL9	20.5145	2.04231	0.491599	4.15443	3.26094e-05	0.000156161
ARMC3	38.0952	2.21048	0.47262	4.67709	2.90976e-06	1.62029e-05
ARNT2	1168.2	1.71256	0.101377	16.893	5.06214e-64	3.05186e-62
ARRDC3	1048.57	1.81124	0.128248	14.1229	2.74557e-45	1.07764e-43
ARRDC4	178.656	1.70311	0.180084	9.45731	3.15982e-21	5.45321e-20
ARSD	95.6503	1.41241	0.234365	6.02656	1.67487e-09	1.33329e-08
ARSE	28.1326	1.28691	0.383952	3.35175	0.000803039	0.00297199
ARSI	448.909	3.31432	0.162115	20.4443	6.7488e-93	6.96698e-91
ARSJ	173.996	-1.69708	0.183519	-9.24747	2.2987e-20	3.81845e-19
ARTN	55.1193	-2.54453	0.317812	-8.00642	1.18095e-15	1.51269e-14
ASIC2	147.289	3.3693	0.271539	12.4081	2.36053e-35	6.80701e-34
ASNS	2402.19	-1.13485	0.0880737	-12.8852	5.45154e-38	1.72617e-36
ASPHD1	141.544	-1.05298	0.204777	-5.14206	2.71745e-07	1.73206e-06
ASPHD2	207.577	-1.06727	0.15979	-6.67921	2.40238e-11	2.25271e-10
ASXL1	2578.68	1.02372	0.0766461	13.3565	1.0856e-40	3.71866e-39
ASXL3	90.5557	4.36506	0.352549	12.3814	3.29464e-35	9.46446e-34
ATF3	321.378	1.53155	0.157092	9.7494	1.85567e-22	3.38603e-21
ATHL1	1600.36	-1.63155	0.114368	-14.2658	3.57628e-46	1.43866e-44
ATL3	404.922	-1.02034	0.126208	-8.0846	6.23711e-16	8.10394e-15
ATOH7	6.13733	-1.94055	0.656488	-2.95596	0.00311696	0.0100721
ATOH8	323.083	3.18087	0.215692	14.7473	3.20396e-49	1.36413e-47
ATP12A	18.1032	-1.42497	0.45438	-3.13607	0.00171226	0.00591004
ATP1A3	453.513	-1.08939	0.124153	-8.77452	1.71632e-18	2.56462e-17
ATP1B2	280.211	-1.3961	0.14884	-9.37986	6.60597e-21	1.12715e-19
ATP2A3	251.372	-2.34303	0.166908	-14.0379	9.14041e-45	3.52038e-43
ATP2B2	27.4924	-2.54836	0.467738	-5.44826	5.08658e-08	3.50709e-07
ATP4A	11.1634	-1.50311	0.54268	-2.7698	0.00560914	0.0171436
ATP6V0A4	8.89937	-2.87951	0.640939	-4.49264	7.03442e-06	3.70278e-05
ATP6V1B1	10.0196	3.08299	0.648313	4.75541	1.98045e-06	1.12781e-05
ATP8A1	405.437	-3.00295	0.140641	-21.3518	3.75087e-101	4.43978e-99
ATP8A2	111.901	-1.1374	0.214579	-5.30064	1.15398e-07	7.64406e-07
ATP8B4	22.2425	1.711	0.461195	3.70994	0.000207309	0.000857612
ATRNL1	314.552	1.82453	0.174384	10.4628	1.28073e-25	2.65883e-24
ATXN1	32.1389	1.44957	0.387563	3.74022	0.000183861	0.00076806
ATXN7L1	906.51	-2.28488	0.119295	-19.1532	9.10027e-82	7.91304e-80
AUH	353.056	-1.02467	0.133694	-7.6643	1.79804e-14	2.12828e-13
AURKC	111.948	-1.46398	0.212392	-6.89282	5.46978e-12	5.41186e-11
AVPR2	17.3365	-1.19471	0.462451	-2.58344	0.00978198	0.0280222
AXIN2	2303.12	3.25416	0.0958238	33.9598	8.73232e-253	6.3684e-250
AZIN2	66.6499	2.62331	0.298968	8.77457	1.71564e-18	2.56462e-17
B3GALT1	476.648	-1.57661	0.154573	-10.1998	1.98761e-24	3.93139e-23
B3GALT5	524.952	-2.13284	0.154153	-13.8359	1.54754e-43	5.74495e-42
B3GALT5-AS1	165.281	-1.80871	0.184833	-9.78566	1.29751e-22	2.38683e-21
B3GAT2	39.2071	-1.17644	0.333171	-3.53104	0.000413935	0.00161683
B3GNT3	9.61846	-2.84745	0.646565	-4.40396	1.06292e-05	5.46145e-05
B3GNT5	451.156	1.29756	0.141221	9.18819	3.99524e-20	6.54999e-19
B3GNT7	376.851	-4.65822	0.377325	-12.3454	5.16017e-35	1.47299e-33
B3GNT8	44.9091	1.01994	0.313818	3.25009	0.00115369	0.00413945
B4GALNT1	162.506	1.41388	0.224417	6.30026	2.97154e-10	2.53991e-09
BAALC	171.363	4.13411	0.560425	7.37673	1.62221e-13	1.80398e-12
BAALC-AS1	17.3538	1.61855	0.495774	3.26469	0.00109582	0.00395188
BAAT	24.4546	2.65772	0.452387	5.87488	4.23138e-09	3.24612e-08
BACH2	121.767	1.88989	0.219093	8.626	6.35333e-18	9.21925e-17
BAHCC1	1224.77	6.39579	0.190541	33.5665	5.16798e-247	3.54054e-244
BARX2	11.5094	3.84392	0.671936	5.72066	1.06112e-08	7.84747e-08
BASP1P1	4.2877	2.59216	0.712436	3.63845	0.000274289	0.00110873
BATF2	53.5568	-1.73566	0.294383	-5.89593	3.72572e-09	2.87086e-08
BBS5	122.29	1.39111	0.200982	6.92158	4.46644e-12	4.4621e-11
BCAN	26.166	1.09832	0.398665	2.75499	0.00586935	0.0178424
BCL11A	279.312	-3.6393	0.182481	-19.9434	1.71006e-88	1.67364e-86
BCL11B	68.4312	-1.43361	0.28744	-4.98752	6.11577e-07	3.72984e-06
BCL2	227.168	1.54343	0.160844	9.59582	8.32486e-22	1.47303e-20
BCL2L11	823.983	1.17245	0.10451	11.2186	3.30624e-29	7.8106e-28
BCL2L14	15.9757	-3.78163	0.58751	-6.4367	1.22098e-10	1.08463e-09
BCL6B	120.82	-1.6074	0.311184	-5.16544	2.3988e-07	1.53719e-06
BCO1	2.99377	-1.94799	0.716146	-2.7201	0.00652614	0.0196097
BCORL1	435.46	1.79937	0.1656	10.8658	1.67803e-27	3.72295e-26
BDKRB2	30.8927	1.86725	0.390726	4.77894	1.76225e-06	1.01428e-05
BDNF	45.6686	-1.02752	0.401946	-2.55638	0.0105769	0.0299577
BDNF-AS	18.1674	1.56043	0.465379	3.35303	0.000799316	0.00296051
BEND4	997.694	-5.36486	0.403221	-13.305	2.16404e-40	7.37927e-39
BEND6	74.9598	1.26999	0.26001	4.88437	1.03757e-06	6.14875e-06
BEST2	3.8412	-1.96392	0.710749	-2.76316	0.0057244	0.0174393
BEST4	19.4966	-1.39272	0.44372	-3.13874	0.00169675	0.00586367
BEX2	938.463	-1.27665	0.103981	-12.2777	1.19317e-34	3.3635e-33
BGN	6721.99	3.46954	0.282482	12.2823	1.12711e-34	3.18522e-33
BHLHA15	10.3679	-2.25317	0.58502	-3.85145	0.000117422	0.000509634
BICC1	71.4838	3.33525	0.319273	10.4464	1.52253e-25	3.14063e-24
BICDL1	592.841	-2.22979	0.174214	-12.7991	1.6579e-37	5.10651e-36
BICDL2	12.5196	-3.60985	0.62042	-5.8184	5.94143e-09	4.49094e-08
BISPR	23.6207	-1.37046	0.406268	-3.37328	0.000742778	0.00276742
BLACAT1	362.102	1.18271	0.151406	7.81152	5.65029e-15	6.94266e-14
BMI1	221.469	1.83511	0.167501	10.9558	6.2317e-28	1.40046e-26
BMP1	801.398	2.23315	0.108841	20.5176	1.50071e-93	1.55634e-91
BMP2	339.892	4.52887	0.22488	20.139	3.35944e-90	3.30218e-88
BMP4	348.458	5.24479	0.256655	20.4351	8.14538e-93	8.37049e-91
BMP5	89.141	5.58808	0.470514	11.8765	1.56708e-32	4.13402e-31
BMP6	195.911	3.79016	0.492811	7.6909	1.46098e-14	1.74025e-13
BMP7	571.07	3.54117	0.347332	10.1953	2.08011e-24	4.11076e-23
BMPR1B	87.1418	1.68981	0.238687	7.07961	1.44562e-12	1.49235e-11
BNC1	21.8624	1.60585	0.477192	3.3652	0.000764879	0.00284274
BNC2	264.257	-3.15728	0.174157	-18.1289	1.88539e-73	1.41876e-71
BNIP3	662.741	1.19123	0.153055	7.78302	7.08161e-15	8.61685e-14
BORCS7	240.259	1.15513	0.153881	7.50668	6.06466e-14	6.9419e-13
BRINP1	341.979	-4.30675	0.196449	-21.9229	1.57025e-106	2.04025e-104
BRINP3	55.6526	2.65652	0.369349	7.19242	6.3652e-13	6.79756e-12
BRSK2	291.437	-2.15703	0.1655	-13.0334	7.89857e-39	2.5805e-37
BSND	8.39936	-3.06436	0.654784	-4.67996	2.86935e-06	1.59937e-05
BSPRY	10.1878	-3.90655	0.670036	-5.83036	5.53065e-09	4.19587e-08
BST2	612.69	-2.57524	0.122964	-20.943	2.17139e-97	2.44233e-95
BTBD11	138.907	-1.29183	0.286384	-4.51083	6.45757e-06	3.41344e-05
BTBD17	715.407	-2.38503	0.165108	-14.4452	2.68582e-47	1.10603e-45
BTG2	800.648	3.02995	0.117928	25.6932	1.39421e-145	3.28338e-143
BTN3A1	104.773	-1.02891	0.230348	-4.46677	7.94094e-06	4.15e-05
BVES	141.872	1.70658	0.244917	6.968	3.21488e-12	3.2375e-11
C10orf10	31.4021	3.62652	0.475286	7.63018	2.3442e-14	2.75743e-13
C10orf11	25.1513	3.12397	0.510782	6.11606	9.59177e-10	7.80039e-09
C10orf142	4.95964	-2.85976	0.708527	-4.03621	5.43215e-05	0.000250735
C10orf25	24.0284	-1.06897	0.426736	-2.505	0.0122452	0.0340863
C10orf71	9.6806	2.80242	0.634983	4.41338	1.01769e-05	5.2386e-05
C10orf82	92.2716	-2.57987	0.25588	-10.0823	6.61316e-24	1.28115e-22
C11orf45	6.57087	2.24264	0.668315	3.35567	0.000791727	0.00293528
C11orf63	27.6592	2.2694	0.418025	5.42886	5.67165e-08	3.88678e-07
C11orf86	3.55545	-2.4	0.716378	-3.35019	0.000807554	0.00298808
C11orf87	426.799	5.25978	0.487563	10.7879	3.92619e-27	8.59277e-26
C15orf39	1270.12	-1.64207	0.0994468	-16.512	3.00561e-61	1.69877e-59
C15orf56	3.2175	-1.79246	0.713414	-2.51252	0.0119873	0.0334785
C16orf13	714.826	-1.01427	0.121341	-8.35886	6.33293e-17	8.6406e-16
C16orf54	46.38	-1.90782	0.367344	-5.19356	2.0631e-07	1.33113e-06
C16orf89	106.129	-1.89397	0.223831	-8.46159	2.63755e-17	3.68084e-16
C16orf92	21.6068	-1.43561	0.421988	-3.40202	0.000668902	0.00251874
C17orf96	1305.56	2.89707	0.16326	17.7452	1.87832e-70	1.31879e-68
C18orf65	14.7944	2.11427	0.529011	3.99664	6.42475e-05	0.000292726
C19orf66	81.2054	-3.7727	0.312975	-12.0543	1.84036e-33	5.00083e-32
C19orf84	35.4083	-2.67436	0.378223	-7.07084	1.53997e-12	1.58758e-11
C1GALT1	1468.7	-1.57087	0.103866	-15.124	1.12578e-51	5.14175e-50
C1QL2	12.9149	-3.61587	0.6183	-5.84808	4.97274e-09	3.78531e-08
C1QL3	13.097	1.40795	0.54171	2.59908	0.00934742	0.0269446
C1QL4	8.96045	2.00108	0.599434	3.33828	0.000842991	0.00310649
C1R	127.351	-2.21139	0.214711	-10.2994	7.09139e-25	1.4289e-23
C1S	539.303	-1.97029	0.404999	-4.86493	1.14497e-06	6.75335e-06
C1orf105	2.25503	1.79064	0.711346	2.51726	0.0118272	0.0330681
C1orf115	143.239	-2.2243	0.233221	-9.53731	1.46587e-21	2.56902e-20
C1orf116	32.4006	-2.11171	0.374213	-5.64307	1.67045e-08	1.20888e-07
C1orf158	10.5158	3.38755	0.695617	4.86986	1.1168e-06	6.59405e-06
C1orf168	3.47529	1.66353	0.708838	2.34685	0.0189331	0.0498648
C1orf194	13.2477	3.42164	0.671481	5.09567	3.47508e-07	2.18599e-06
C1orf210	3.72188	-2.48289	0.715539	-3.46996	0.000520535	0.00199767
C1orf228	7.81355	1.93678	0.620518	3.12124	0.00180094	0.00618498
C1orf53	26.2073	2.40444	0.451252	5.32837	9.90956e-08	6.61262e-07
C1orf64	24.8221	4.26073	0.59638	7.14433	9.0439e-13	9.51883e-12
C20orf166-AS1	9.88146	1.61115	0.564683	2.85319	0.00432827	0.0135606
C22orf15	131.846	-1.252	0.203329	-6.15751	7.38997e-10	6.07757e-09
C22orf23	12.6179	1.3057	0.52301	2.49652	0.012542	0.0348213
C22orf24	11.3134	1.46546	0.546389	2.68208	0.00731662	0.0216709
C2CD2	435.446	-1.24745	0.129025	-9.66823	4.11413e-22	7.36439e-21
C2CD2L	166.745	1.27871	0.179272	7.13281	9.83435e-13	1.0279e-11
C2orf15	40.9274	-2.07488	0.340264	-6.09786	1.075e-09	8.70785e-09
C2orf40	49.8378	1.26538	0.318792	3.96931	7.20814e-05	0.000324948
C2orf72	44.4838	1.11258	0.312386	3.56156	0.000368654	0.0014581
C2orf80	13.0007	-1.95731	0.533405	-3.66946	0.000243068	0.000991391
C2orf82	18.4854	-1.08336	0.445717	-2.43059	0.0150742	0.0409612
C2orf88	29.0697	1.02535	0.383496	2.67369	0.00750212	0.0221652
C3	26.5083	-2.86912	0.446212	-6.42995	1.27645e-10	1.13213e-09
C3orf52	1920.21	3.13133	0.140426	22.2988	3.7951e-110	5.16865e-108
C3orf80	10.7563	1.59083	0.561315	2.83412	0.00459524	0.0143256
C4orf19	40.949	1.09523	0.33471	3.27218	0.00106723	0.00385799
C4orf47	35.0057	1.01059	0.352106	2.87013	0.00410302	0.0129302
C5AR2	5.87338	-1.8136	0.659775	-2.74882	0.00598108	0.0181309
C5orf38	65.584	-1.83566	0.32477	-5.6522	1.58406e-08	1.15116e-07
C5orf42	754.687	1.35961	0.139179	9.76879	1.5327e-22	2.81032e-21
C5orf49	36.2608	2.31629	0.448785	5.16124	2.45324e-07	1.56941e-06
C5orf58	6.61947	-1.75286	0.636052	-2.75585	0.005854	0.017803
C6orf1	75.3166	1.18175	0.250488	4.71779	2.38418e-06	1.34384e-05
C6orf118	74.657	2.32944	0.323259	7.20611	5.75711e-13	6.16273e-12
C6orf132	339.09	-3.87429	0.169666	-22.8348	2.06801e-115	3.09627e-113
C6orf141	51.5947	-2.29918	0.320511	-7.17347	7.31191e-13	7.76821e-12
C6orf25	22.2886	2.41876	0.462444	5.23038	1.69159e-07	1.1018e-06
C6orf52	25.3962	1.32461	0.404938	3.27114	0.00107116	0.00387096
C6orf99	8.82315	-1.93235	0.591408	-3.26737	0.00108551	0.00392033
C7	271.642	7.98094	0.522902	15.2628	1.3538e-52	6.33678e-51
C7orf57	13.8817	3.18632	0.627384	5.07874	3.79942e-07	2.37745e-06
C8orf31	60.7375	1.38051	0.281519	4.9038	9.39993e-07	5.58365e-06
C8orf48	57.2979	1.43932	0.297455	4.83877	1.30645e-06	7.64398e-06
C9orf135	43.8828	-3.61901	0.42368	-8.54184	1.32102e-17	1.87715e-16
C9orf24	27.7812	2.83684	0.532023	5.33218	9.70423e-08	6.48133e-07
C9orf47	37.6624	1.36481	0.403876	3.37928	0.000726761	0.00271222
C9orf91	407.44	-1.12908	0.152459	-7.40584	1.30326e-13	1.45862e-12
CA10	13.1175	3.28744	0.605011	5.43369	5.52014e-08	3.78983e-07
CA11	2449.69	-1.34475	0.125324	-10.7301	7.3493e-27	1.59303e-25
CA4	174.085	5.00854	0.315856	15.857	1.25714e-56	6.4594e-55
CA7	15.0339	-3.18039	0.561338	-5.66573	1.46398e-08	1.0687e-07
CA8	49.671	1.19382	0.294371	4.05548	5.00306e-05	0.000232067
CA9	14.7428	-1.1688	0.487064	-2.39969	0.0164089	0.0440585
CACHD1	6540.93	1.15898	0.0902077	12.8479	8.84097e-38	2.76455e-36
CACNA1B	309.635	-1.41195	0.169545	-8.32792	8.22757e-17	1.11316e-15
CACNA1E	126.039	1.51216	0.520378	2.90589	0.00366205	0.0116641
CACNA1I	92.7982	2.50774	0.340757	7.35932	1.84843e-13	2.0495e-12
CACNA1S	65.4305	-1.29799	0.271483	-4.78109	1.74345e-06	1.00448e-05
CACNA2D2	603.617	-1.52551	0.184718	-8.25859	1.47404e-16	1.97892e-15
CACNA2D3	25.8519	-2.82387	0.448092	-6.30199	2.93846e-10	2.51544e-09
CACNB3	540.689	1.44841	0.126539	11.4464	2.45211e-30	5.96741e-29
CACNG4	267.344	3.2517	0.419416	7.75293	8.97993e-15	1.08566e-13
CACNG5	12.0515	-1.66739	0.56331	-2.95998	0.00307661	0.00996363
CACNG8	1282.34	-1.01522	0.12956	-7.83591	4.65464e-15	5.75038e-14
CADM1	1496.65	1.73058	0.0939543	18.4193	9.19195e-76	7.19071e-74
CADM2	357.028	-1.85172	0.170635	-10.8519	1.95284e-27	4.31995e-26
CADPS2	253.632	-2.38745	0.15818	-15.0932	1.79481e-51	8.14802e-50
CALB1	378.807	-6.49366	0.287372	-22.5967	4.66699e-113	6.63593e-111
CALCRL	72.9582	-1.68152	0.258091	-6.51524	7.25758e-11	6.5737e-10
CALHM1	12.5075	-2.79563	0.577999	-4.83674	1.31988e-06	7.71651e-06
CALN1	185.724	-3.52864	0.231895	-15.2166	2.74569e-52	1.27202e-50
CAMK2A	38.1122	2.91537	0.406712	7.16813	7.60288e-13	8.06597e-12
CAMKK1	137.514	-1.87733	0.201055	-9.3374	9.87251e-21	1.66939e-19
CAMSAP3	488.155	-2.06072	0.133713	-15.4116	1.36884e-53	6.58442e-52
CAP2P1	4.41458	-2.26538	0.707319	-3.20277	0.00136113	0.0048067
CAPN11	138.948	-1.25664	0.286603	-4.38462	1.16189e-05	5.94824e-05
CAPN12	28.7258	-1.16351	0.373451	-3.11557	0.00183589	0.00628877
CAPN13	73.4028	-3.93967	0.368085	-10.7031	9.83896e-27	2.11645e-25
CAPN6	274.744	-1.81971	0.163251	-11.1467	7.43001e-29	1.72285e-27
CAPRIN2	2843.32	-1.6105	0.0789343	-20.4031	1.5695e-92	1.59834e-90
CAPS2	29.5047	1.45588	0.382666	3.80457	0.000142051	0.000606744
CARD11	830.57	-2.17759	0.328975	-6.61933	3.60841e-11	3.35164e-10
CARMIL2	344.139	-2.80563	0.199537	-14.0607	6.62439e-45	2.57327e-43
CARMIL3	253.124	-1.06451	0.162602	-6.54674	5.88077e-11	5.36748e-10
CARMN	38.0475	2.8972	0.407932	7.10217	1.22817e-12	1.27369e-11
CASC10	539.954	-1.05048	0.138347	-7.5931	3.12339e-14	3.63988e-13
CASP10	43.374	-2.36587	0.35402	-6.68289	2.34282e-11	2.1996e-10
CASP4	2.70599	-2.08471	0.716011	-2.91156	0.00359625	0.0114691
CASP7	395.378	1.75402	0.151829	11.5527	7.15738e-31	1.78013e-29
CASQ1	68.48	1.28496	0.286436	4.48603	7.25626e-06	3.81068e-05
CAV1	114.928	-2.02976	0.311138	-6.52366	6.86134e-11	6.22727e-10
CBLC	61.7051	-4.01866	0.380668	-10.5569	4.72192e-26	9.95833e-25
CBLN2	5.56757	2.70392	0.71193	3.79801	0.000145863	0.000621852
CBR1	605.285	-1.67894	0.113612	-14.7778	2.03601e-49	8.71783e-48
CBX4	148.878	1.93348	0.214502	9.0138	1.9904e-19	3.15119e-18
CBX7	50.5013	-1.97002	0.312883	-6.29637	3.047e-10	2.60048e-09
CBX8	154.015	3.09203	0.243641	12.6909	6.63895e-37	2.00124e-35
CCBE1	179.883	-1.8053	0.256595	-7.03559	1.98413e-12	2.02791e-11
CCDC110	6.84588	-2.47609	0.660619	-3.74814	0.000178153	0.000746559
CCDC140	4.02945	1.82888	0.704465	2.59612	0.00942832	0.0271432
CCDC148	36.9028	1.24632	0.356121	3.4997	0.000465779	0.00180345
CCDC167	273.941	1.54924	0.16542	9.36549	7.5695e-21	1.28767e-19
CCDC169	36.9447	1.27266	0.368891	3.44997	0.000560647	0.00213854
CCDC170	9.71947	2.46024	0.648267	3.7951	0.000147584	0.000628357
CCDC172	17.4305	-4.6688	0.636248	-7.33801	2.16789e-13	2.3792e-12
CCDC177	162.817	-1.14182	0.187127	-6.10187	1.04836e-09	8.50426e-09
CCDC184	81.4138	1.41734	0.25828	5.48761	4.07399e-08	2.84011e-07
CCDC3	35.8667	1.67736	0.37685	4.451	8.54731e-06	4.44326e-05
CCDC33	148.344	1.76098	0.201917	8.72133	2.74954e-18	4.07084e-17
CCDC57	462.59	1.60845	0.138307	11.6296	2.9139e-31	7.35239e-30
CCDC60	14.867	1.24127	0.49417	2.51182	0.0120109	0.0335403
CCDC63	14.9014	-2.31516	0.536668	-4.31396	1.60354e-05	8.04012e-05
CCDC69	188.708	-1.43744	0.241831	-5.94396	2.78217e-09	2.16223e-08
CCDC80	872.415	1.9787	0.117435	16.8493	1.06197e-63	6.29564e-62
CCDC85A	66.1974	5.4997	0.51308	10.719	8.28962e-27	1.78828e-25
CCDC88B	221.512	-2.05521	0.183997	-11.1698	5.73118e-29	1.3344e-27
CCDC92	172.859	1.65768	0.187155	8.85727	8.20001e-19	1.25685e-17
CCDC92B	11.0883	-1.53325	0.541718	-2.83034	0.00464981	0.0144758
CCKBR	102.089	-3.00753	0.267557	-11.2407	2.57329e-29	6.11103e-28
CCL2	99.0477	1.029	0.224181	4.59006	4.43111e-06	2.39776e-05
CCL26	11.5818	2.08436	0.570083	3.65625	0.000255931	0.00103917
CCNA1	3.50206	1.92066	0.714228	2.68914	0.00716358	0.0212734
CCSAP	265.108	1.09327	0.183048	5.9726	2.33502e-09	1.83045e-08
CD151	773.937	1.74578	0.106492	16.3936	2.12464e-60	1.1831e-58
CD164L2	15.0181	-1.49709	0.503574	-2.97292	0.00294979	0.00960658
CD177	7.35086	-2.80093	0.660523	-4.24047	2.23055e-05	0.000109531
CD177P1	3.18932	-2.2504	0.716872	-3.13919	0.00169414	0.00585554
CD19	4.98218	-1.62925	0.682721	-2.3864	0.0170141	0.0454944
CD1C	4.48985	-2.77073	0.710198	-3.90135	9.56586e-05	0.000422063
CD200	1595.79	-1.4611	0.106701	-13.6935	1.11065e-42	4.03692e-41
CD22	9.41486	-1.98377	0.592825	-3.3463	0.000818988	0.00302692
CD226	9.31949	1.96205	0.616117	3.18455	0.00144982	0.00508256
CD24	32578.3	-1.7624	0.0724796	-24.3158	1.33326e-130	2.55444e-128
CD2AP	1949.92	-1.41423	0.105274	-13.4337	3.83495e-41	1.31764e-39
CD302	13.7864	1.36401	0.51468	2.65022	0.00804395	0.023575
CD36	20.16	3.44092	0.56523	6.08765	1.14581e-09	9.25491e-09
CD37	95.4705	1.88161	0.239688	7.85024	4.15248e-15	5.14689e-14
CD3D	6.90221	-2.01498	0.641461	-3.14123	0.0016824	0.0058203
CD4	271.851	1.65095	0.165161	9.99601	1.58665e-23	3.01944e-22
CD40	10.5676	-1.65974	0.559379	-2.96712	0.00300606	0.00976452
CD44	236.961	2.23076	0.175535	12.7083	5.31477e-37	1.61067e-35
CD48	4.99021	-1.79544	0.67595	-2.65618	0.00790317	0.0232136
CD5	9.90706	3.19976	0.677145	4.72537	2.29695e-06	1.29921e-05
CD53	15.8079	-2.05149	0.496498	-4.13192	3.59746e-05	0.000171116
CD72	14.9493	-1.31802	0.477597	-2.7597	0.00578548	0.0176135
CD79A	10.7889	-1.53186	0.548058	-2.79506	0.00518898	0.0159914
CD82	389.004	2.65685	0.408191	6.50884	7.57312e-11	6.84853e-10
CD9	1163.8	-3.55686	0.103839	-34.2535	3.87391e-257	2.91938e-254
CDA	59.5199	-1.118	0.271154	-4.12311	3.73789e-05	0.00017705
CDC42EP1	697.845	1.0472	0.1405	7.45338	9.09758e-14	1.02942e-12
CDC42EP2	432.604	-1.0746	0.132013	-8.14012	3.94883e-16	5.19645e-15
CDC42EP3	765.786	-1.38975	0.126445	-10.9909	4.22589e-28	9.59225e-27
CDC42EP4	1201.15	1.14545	0.0961399	11.9144	9.96293e-33	2.64058e-31
CDCA7L	1769.46	-1.02671	0.0902101	-11.3813	5.18102e-30	1.2541e-28
CDCP1	77.9234	-3.93233	0.354025	-11.1075	1.15342e-28	2.65004e-27
CDH1	355.333	-7.10023	0.345769	-20.5346	1.05716e-93	1.10649e-91
CDH10	199.298	2.19372	0.23335	9.40102	5.40374e-21	9.25513e-20
CDH11	5645.4	4.60917	0.133529	34.5182	4.28393e-261	3.87404e-258
CDH12	7.18139	2.96406	0.676108	4.384	1.16522e-05	5.96136e-05
CDH13	19.645	1.06542	0.446413	2.38662	0.0170039	0.0454724
CDH2	7295.29	2.12827	0.0745118	28.5628	1.94609e-179	7.7188e-177
CDH20	36.5605	2.76587	0.41132	6.72439	1.76331e-11	1.67149e-10
CDH24	2308.11	2.17051	0.0896976	24.1981	2.3303e-129	4.39028e-127
CDH3	687.595	-3.22892	0.158521	-20.369	3.15307e-92	3.19662e-90
CDH4	883.567	1.09844	0.108549	10.1193	4.53534e-24	8.824e-23
CDH5	27.4005	-4.24778	0.520605	-8.15931	3.36944e-16	4.44696e-15
CDH6	727.766	2.84839	0.153144	18.5994	3.24928e-77	2.62356e-75
CDH7	126.313	3.72295	0.276151	13.4816	2.00686e-41	6.96943e-40
CDH8	59.0471	1.05082	0.320386	3.27987	0.00103856	0.003764
CDH9	8.6543	-3.61719	0.683532	-5.29191	1.21045e-07	7.99467e-07
CDHR3	98.9499	-1.51537	0.252724	-5.99617	2.02027e-09	1.5931e-08
CDK5R2	6.49313	1.6985	0.668731	2.53989	0.0110887	0.0312141
CDK6	1187.35	2.40954	0.287231	8.38888	4.9081e-17	6.74133e-16
CDKL2	19.6603	1.07425	0.437489	2.45548	0.0140696	0.0385885
CDKN1A	555.034	2.48735	0.164812	15.092	1.82743e-51	8.24642e-50
CDKN1B	267.408	1.463	0.168668	8.67384	4.17784e-18	6.14525e-17
CDKN2B	20.7358	2.78904	0.535154	5.21165	1.87165e-07	1.21244e-06
CDS1	517.413	-2.46008	0.132932	-18.5063	1.83553e-76	1.45606e-74
CDX1	1397.19	9.72354	0.44186	22.0059	2.52689e-107	3.34081e-105
CDX2	3986.25	10.9876	0.406341	27.0404	4.94727e-161	1.43395e-158
CDYL	2090.34	-1.08887	0.0797498	-13.6536	1.92204e-42	6.89739e-41
CEACAM1	31.17	-2.94225	0.436949	-6.73361	1.65501e-11	1.57278e-10
CEACAM19	83.5779	1.23068	0.244208	5.03948	4.66799e-07	2.88976e-06
CEACAM21	13.9856	1.72691	0.530354	3.25615	0.00112934	0.00406046
CEBPB	152.742	-1.57781	0.188953	-8.35028	6.80993e-17	9.26348e-16
CEBPZOS	25.7415	-1.22339	0.423815	-2.8866	0.00389423	0.012322
CELF2	704.909	-1.58119	0.152913	-10.3405	4.62291e-25	9.35673e-24
CELF5	336.975	-1.18411	0.149846	-7.90216	2.74119e-15	3.43339e-14
CELSR1	953.798	1.27003	0.112744	11.2647	1.96038e-29	4.67513e-28
CEMIP	65.3063	1.68151	0.391615	4.29377	1.75661e-05	8.76096e-05
CEP112	172.375	1.03645	0.183879	5.63658	1.73462e-08	1.25292e-07
CEP19	118.298	1.05422	0.211892	4.97527	6.51582e-07	3.9525e-06
CERCAM	485.1	3.11434	0.179784	17.3227	3.17029e-67	2.04783e-65
CERKL	26.2259	1.11168	0.410146	2.71044	0.00671935	0.02011
CERS4	610.13	-1.01208	0.117881	-8.58559	9.03743e-18	1.29397e-16
CES1	7.91389	3.41109	0.687138	4.96421	6.89826e-07	4.16883e-06
CES1P1	27.9754	2.39123	0.437833	5.46151	4.72094e-08	3.26495e-07
CFAP221	18.2592	1.11363	0.457349	2.43496	0.0148933	0.0405184
CFAP43	33.4824	1.94468	0.378054	5.14392	2.69065e-07	1.71595e-06
CFAP45	56.3679	2.7745	0.675721	4.10599	4.02585e-05	0.000189538
CFAP57	9.78964	1.94364	0.595874	3.26184	0.00110693	0.00398803
CFAP61	17.1119	2.5127	0.538435	4.66667	3.06122e-06	1.69752e-05
CFAP77	21.9207	2.03092	0.518105	3.9199	8.85853e-05	0.00039362
CFC1	5.24302	2.71385	0.71094	3.81728	0.000134933	0.000579074
CFP	26.6923	-1.08292	0.399056	-2.7137	0.00665367	0.0199372
CFTR	29.5403	-1.88541	0.40107	-4.70095	2.5896e-06	1.4513e-05
CGN	1146.46	-1.94534	0.105327	-18.4696	3.62919e-76	2.86884e-74
CGREF1	45.2208	-1.67574	0.325963	-5.14088	2.73457e-07	1.74101e-06
CH507-42P11.8	37.1262	1.34106	0.351983	3.81003	0.000138951	0.000595064
CHAC1	207.304	-1.6289	0.170855	-9.53382	1.51605e-21	2.65285e-20
CHDH	285.242	-1.2139	0.143176	-8.47836	2.28385e-17	3.19513e-16
CHGA	3875.9	-4.41511	0.428722	-10.2983	7.17161e-25	1.44377e-23
CHI3L1	249.159	2.59183	0.192302	13.4779	2.10993e-41	7.31616e-40
CHL1	212.251	4.73332	0.664911	7.11874	1.08921e-12	1.13426e-11
CHMP3	648.703	1.4117	0.111714	12.6367	1.32486e-36	3.95152e-35
CHODL	171.327	-3.27925	0.207845	-15.7774	4.45011e-56	2.26595e-54
CHRD	1871.79	2.85964	0.605808	4.72038	2.35405e-06	1.32851e-05
CHRDL1	679.914	-1.01432	0.109516	-9.26179	2.01031e-20	3.35665e-19
CHRNA3	105.123	1.20574	0.231512	5.20812	1.90766e-07	1.234e-06
CHRNA4	22.0777	-2.11196	0.436386	-4.83966	1.3006e-06	7.61168e-06
CHRNA7	155.835	1.39566	0.198561	7.02886	2.0823e-12	2.12632e-11
CHRNA9	189.828	-1.5354	0.177255	-8.66212	4.63065e-18	6.78922e-17
CHRNB2	272.523	-1.81476	0.148266	-12.2399	1.90179e-34	5.34773e-33
CHRNB4	27.014	-2.15532	0.401963	-5.36197	8.2318e-08	5.54543e-07
CHRND	23.1182	1.94076	0.445966	4.35181	1.35021e-05	6.8443e-05
CHST13	31.2241	-4.11269	0.492384	-8.35262	6.67676e-17	9.09327e-16
CHST4	228.049	-3.92315	0.210249	-18.6595	1.05655e-77	8.65448e-76
CHST7	424.182	-1.18352	0.394748	-2.99818	0.00271602	0.00891977
CHST8	58.5878	-1.82386	0.29623	-6.15692	7.41742e-10	6.0935e-09
CHST9	81.1565	-1.9671	0.264441	-7.4387	1.01679e-13	1.14652e-12
CISH	110.987	1.44529	0.223478	6.46723	9.98148e-11	8.93354e-10
CISTR	12.0071	2.9523	0.601366	4.90932	9.13909e-07	5.43442e-06
CITED1	216.375	3.41395	0.417235	8.18232	2.7842e-16	3.68748e-15
CITED4	117.677	-1.48193	0.229005	-6.47117	9.72466e-11	8.71749e-10
CKAP4	5738.15	1.04668	0.0723044	14.4761	1.71601e-47	7.13155e-46
CKB	1220.93	1.35877	0.106933	12.7067	5.42698e-37	1.64248e-35
CKMT1A	168.307	-1.25934	0.174993	-7.19652	6.17679e-13	6.60259e-12
CKMT1B	207.749	-1.46339	0.165677	-8.83281	1.02076e-18	1.55299e-17
CKMT2	82.1378	1.76405	0.253896	6.94791	3.70736e-12	3.7235e-11
CKMT2-AS1	186.626	1.14155	0.167832	6.80173	1.03367e-11	9.98256e-11
CLCA2	15.3614	3.13145	0.568438	5.50888	3.61133e-08	2.52771e-07
CLCN1	13.2526	-1.82508	0.55443	-3.29181	0.000995436	0.00362747
CLCN5	967.846	1.38836	0.122949	11.2922	1.43435e-29	3.43515e-28
CLDN1	66.693	-1.00244	0.271943	-3.68622	0.000227614	0.000934621
CLDN10	327.042	-2.58148	0.169237	-15.2537	1.5558e-52	7.23734e-51
CLDN3	67.7174	-5.68331	0.482719	-11.7735	5.34338e-32	1.39174e-30
CLDN6	7533.95	-1.76116	0.0996405	-17.6752	6.51594e-70	4.51878e-68
CLDN7	12.2174	-1.38396	0.518692	-2.66818	0.00762642	0.0224796
CLDN9	8.30522	-1.49391	0.599865	-2.49042	0.0127593	0.0353327
CLEC10A	6.89599	2.499	0.706528	3.53701	0.000404684	0.00158399
CLEC11A	412.057	1.70786	0.15534	10.9943	4.06862e-28	9.24457e-27
CLEC14A	12.3981	-3.3919	0.610373	-5.55709	2.74304e-08	1.94281e-07
CLEC1A	75.2557	3.78562	0.371438	10.1918	2.15757e-24	4.25269e-23
CLEC4D	5.64749	-3.02207	0.704299	-4.29088	1.77964e-05	8.86605e-05
CLEC4E	7.05216	1.61366	0.631135	2.55675	0.0105654	0.0299328
CLGN	359.038	-1.23885	0.15572	-7.95563	1.78221e-15	2.25474e-14
CLIP4	45.5294	1.92203	0.339004	5.66963	1.43108e-08	1.0457e-07
CLSTN2	132.756	3.83043	0.276942	13.8311	1.6536e-43	6.1286e-42
CLVS2	44.563	1.24825	0.354738	3.51879	0.000433514	0.00168748
CLYBL	178.643	-1.37078	0.1729	-7.92814	2.2245e-15	2.79864e-14
CMB9-22P13.1	6.6647	2.05858	0.658914	3.1242	0.0017829	0.00612674
CMKLR1	92.2869	1.18579	0.237619	4.9903	6.0286e-07	3.67767e-06
CNKSR1	358.551	-1.18499	0.145613	-8.13795	4.02022e-16	5.28733e-15
CNKSR3	554.106	2.03779	0.124235	16.4027	1.82931e-60	1.02116e-58
CNN1	952.443	1.91443	0.100484	19.0521	6.30633e-81	5.44174e-79
CNR1	10.8149	1.50394	0.559166	2.68961	0.00715345	0.0212489
CNTFR	1715.84	4.02083	0.108532	37.0474	1.98053e-300	2.63387e-297
CNTFR-AS1	17.7834	2.5224	0.511528	4.93112	8.17615e-07	4.89919e-06
CNTN1	28.7847	-1.89454	0.389676	-4.86183	1.16304e-06	6.85274e-06
CNTN2	164.187	-3.61652	0.223474	-16.1832	6.62464e-59	3.5916e-57
CNTN4	59.2939	1.88682	0.334189	5.64598	1.64248e-08	1.18978e-07
CNTN6	12.6	2.85286	0.623534	4.57531	4.75511e-06	2.55961e-05
COBL	157.316	-3.34604	0.474459	-7.05233	1.7595e-12	1.80566e-11
COBLL1	79.8669	-1.04834	0.244403	-4.28938	1.7917e-05	8.92022e-05
COL11A1	1873.51	2.22499	0.104102	21.3733	2.37031e-101	2.82042e-99
COL12A1	844.431	4.30276	0.173069	24.8615	1.9436e-136	4.18485e-134
COL13A1	610.864	2.28171	0.151428	15.068	2.63018e-51	1.17982e-49
COL14A1	621.372	2.58217	0.150658	17.1393	7.56172e-66	4.70952e-64
COL1A1	4919.76	1.27608	0.10573	12.0692	1.53548e-33	4.18746e-32
COL1A2	11166.9	1.51516	0.0788173	19.2236	2.34673e-82	2.07246e-80
COL21A1	61.3434	-1.09178	0.292723	-3.72972	0.000191694	0.000797831
COL24A1	54.0498	-2.01683	0.328396	-6.14145	8.17693e-10	6.69555e-09
COL26A1	2233.57	-1.12189	0.0956456	-11.7296	8.98568e-32	2.3164e-30
COL27A1	1198.8	1.00524	0.111522	9.01382	1.99009e-19	3.15119e-18
COL28A1	14.5778	1.73165	0.505308	3.42693	0.000610452	0.0023138
COL2A1	7675.4	3.206	0.422806	7.58267	3.38523e-14	3.93892e-13
COL3A1	2076.09	7.28158	0.42159	17.2717	7.68422e-67	4.87991e-65
COL4A1	4418.75	1.15609	0.0740506	15.6122	6.01285e-55	2.96809e-53
COL4A2	5073.74	1.15356	0.0908246	12.701	5.83808e-37	1.76454e-35
COL5A1	1796.61	1.51842	0.130173	11.6646	1.93306e-31	4.92701e-30
COL5A3	79.6058	1.61514	0.276085	5.85017	4.91064e-09	3.74308e-08
COL6A3	191.958	1.21284	0.186561	6.50102	7.97761e-11	7.19991e-10
COL8A2	31.7579	-1.62376	0.367843	-4.41428	1.01348e-05	5.21932e-05
COL9A1	1145.31	-1.14426	0.163665	-6.99148	2.71992e-12	2.75009e-11
COL9A2	248.712	1.21117	0.163386	7.41295	1.23517e-13	1.38653e-12
COLEC12	738.283	3.99227	0.135583	29.4453	1.44489e-190	6.80544e-188
COLGALT2	240.103	1.61003	0.174511	9.22597	2.81014e-20	4.64753e-19
COMMD3	39.1174	2.10846	0.35424	5.95208	2.64749e-09	2.06465e-08
COMTD1	100.591	-1.14312	0.215759	-5.29815	1.16984e-07	7.7423e-07
CORO2B	500.641	-1.19412	0.15768	-7.57303	3.64619e-14	4.22734e-13
COTL1	9988.37	1.88116	0.0728265	25.8307	4.01243e-147	9.65031e-145
COX6B2	10.1356	-1.3587	0.574069	-2.36679	0.0179433	0.0476307
CP	21.618	-1.60174	0.47788	-3.35175	0.000803021	0.00297199
CPA1	6.67475	2.97497	0.705986	4.21393	2.50966e-05	0.000122176
CPA2	21.6501	1.77153	0.481472	3.67941	0.000233775	0.000957459
CPA4	7.36398	2.06583	0.671246	3.07761	0.00208669	0.00704853
CPAMD8	505.286	1.47442	0.130035	11.3386	8.44624e-30	2.03792e-28
CPE	712.245	1.54073	0.143285	10.7529	5.74326e-27	1.2509e-25
CPEB2	79.118	2.17313	0.264712	8.20941	2.22285e-16	2.96135e-15
CPNE9	78.1224	-1.75997	0.270269	-6.51192	7.41952e-11	6.71499e-10
CPS1	1177.39	1.26084	0.102109	12.3479	4.99851e-35	1.42865e-33
CPT1A	87.2739	-3.19934	0.278935	-11.4699	1.86966e-30	4.57533e-29
CPXM1	4641.01	1.88608	0.115364	16.349	4.4191e-60	2.43676e-58
CPXM2	161.047	-5.61685	0.336016	-16.716	1.00157e-62	5.83596e-61
CPZ	10.359	-1.8163	0.568698	-3.19378	0.00140423	0.00493577
CR2	55.8552	-4.24884	0.395799	-10.7348	6.98419e-27	1.5168e-25
CRABP2	18497.4	4.43808	0.0872878	50.8442	0	0
CRACR2A	50.4619	-1.46552	0.30236	-4.84694	1.25382e-06	7.35506e-06
CRB1	19.8314	1.51427	0.479623	3.15721	0.00159284	0.00553674
CRB2	1715.95	3.54843	0.149779	23.691	4.45947e-124	7.63785e-122
CRB3	18.1701	-4.39837	0.61429	-7.16009	8.06256e-13	8.52167e-12
CREB3L3	4.44909	-1.89134	0.697391	-2.71202	0.00668746	0.0200225
CRHR1	105.983	4.07989	0.328785	12.409	2.33562e-35	6.74376e-34
CRIP3	148.491	-1.48962	0.202658	-7.35041	1.97605e-13	2.18244e-12
CRISPLD2	30.0144	-1.4459	0.380001	-3.805	0.000141806	0.000605926
CRLF1	157.58	1.55808	0.493439	3.15759	0.00159078	0.00553129
CRNDE	138.359	1.99446	0.205144	9.72226	2.42352e-22	4.39031e-21
CRTAC1	71.4914	2.88212	0.323931	8.89734	5.72011e-19	8.83939e-18
CRTAM	27.4856	4.71641	0.601605	7.83971	4.51585e-15	5.58808e-14
CRYBA4	50.2567	-2.03696	0.393908	-5.17117	2.32631e-07	1.49328e-06
CRYBB1	36.8294	-1.66375	0.373886	-4.44988	8.59201e-06	4.46445e-05
CRYGEP	27.7201	-2.77329	0.426517	-6.50218	7.91665e-11	7.1506e-10
CRYM	177.424	1.49395	0.428945	3.48284	0.000496131	0.00191245
CSDC2	57.9484	-1.10999	0.294815	-3.76505	0.000166514	0.000702342
CSF1	712.633	1.92893	0.106726	18.0736	5.14231e-73	3.81172e-71
CSF3R	8.27205	3.14959	0.668581	4.71085	2.46686e-06	1.38664e-05
CSGALNACT1	17.9597	1.91526	0.513595	3.72913	0.000192142	0.000799402
CSMD2	564.177	-1.06722	0.140237	-7.61011	2.73857e-14	3.20833e-13
CSMD3	15.8547	3.56686	0.588332	6.06268	1.33875e-09	1.07442e-08
CSRNP3	256.517	1.26114	0.172525	7.30989	2.67356e-13	2.91577e-12
CST2	26.923	2.99198	0.462553	6.4684	9.9046e-11	8.87176e-10
CST3	1158.33	1.62465	0.140881	11.5321	9.09404e-31	2.25437e-29
CTA-293F17.1	19.4369	1.08499	0.439178	2.4705	0.0134925	0.0371318
CTA-414D7.1	35.5655	-3.22473	0.407458	-7.91425	2.4874e-15	3.12591e-14
CTA-963H5.5	2.9653	1.75709	0.7158	2.45473	0.0140992	0.038651
CTB-1144G6.6	4.10182	2.52407	0.713975	3.53523	0.000407422	0.00159332
CTB-119C2.1	19.3084	-1.23394	0.444743	-2.77449	0.00552879	0.0169209
CTB-134H23.3	9.3172	-1.86066	0.588467	-3.16188	0.00156753	0.00545966
CTB-151G24.2	5.30529	-2.38028	0.686577	-3.46688	0.000526533	0.00201829
CTB-171A8.1	18.4371	-2.38516	0.498142	-4.78812	1.68355e-06	9.71706e-06
CTB-25B13.12	19.8115	2.24027	0.469707	4.7695	1.84686e-06	1.05848e-05
CTB-41I6.1	2.92479	-1.91918	0.716435	-2.67879	0.00738878	0.021856
CTB-41I6.2	3.23855	-2.32109	0.71674	-3.23839	0.00120205	0.00429317
CTB-58E17.1	19.9326	2.14216	0.513618	4.17072	3.03639e-05	0.000146088
CTBP2P8	6.70179	2.74454	0.690412	3.97522	7.03146e-05	0.000317935
CTC-254B4.1	7.15761	-3.40043	0.690725	-4.92298	8.52344e-07	5.09513e-06
CTC-286N12.1	14.6635	-1.51951	0.504885	-3.00961	0.00261582	0.00862706
CTC-297N7.9	10.6381	-2.01876	0.564161	-3.57834	0.000345778	0.00137436
CTC-301O7.4	31.4834	1.13221	0.363625	3.11368	0.00184771	0.00632351
CTC-304I17.5	23.9769	-4.37945	0.55495	-7.8916	2.98328e-15	3.72424e-14
CTC-304I17.6	20.0271	-3.89027	0.555378	-7.00472	2.47472e-12	2.5089e-11
CTC-439O9.1	4.42504	-2.4656	0.704726	-3.49866	0.000467598	0.00180987
CTC-455F18.1	32.8788	-2.52061	0.40018	-6.2987	3.00156e-10	2.5646e-09
CTC-458G6.4	2.8133	-2.08896	0.715915	-2.91789	0.00352406	0.0112595
CTC-526N19.1	50.566	-3.15715	0.354154	-8.91461	4.89532e-19	7.59077e-18
CTC-529P8.1	2.65104	1.89506	0.713586	2.65568	0.00791476	0.0232386
CTC-591M7.1	7.59772	-2.74028	0.666968	-4.10856	3.98134e-05	0.000187756
CTCFL	150.816	-3.89243	0.244569	-15.9155	4.94982e-57	2.57847e-55
CTD-2015G9.2	190.968	-5.25491	0.295318	-17.7941	7.85866e-71	5.56955e-69
CTD-2034I21.2	21.6379	-2.19657	0.457913	-4.79691	1.61128e-06	9.32374e-06
CTD-2058B24.2	103.041	-4.49466	0.330953	-13.5809	5.19612e-42	1.83267e-40
CTD-2142D14.1	13.4084	-4.02131	0.635068	-6.3321	2.4184e-10	2.09484e-09
CTD-2195M15.1	2.1352	-1.70999	0.705707	-2.42309	0.015389	0.0417214
CTD-2227E11.1	19.8635	-1.45803	0.448913	-3.2479	0.00116258	0.00416805
CTD-2263F21.1	3.17751	1.83878	0.715083	2.57141	0.0101284	0.0288736
CTD-2297D10.2	32.9522	-1.86526	0.408252	-4.56891	4.90277e-06	2.63345e-05
CTD-2298J14.2	22.2253	2.87645	0.493541	5.82819	5.60324e-09	4.24952e-08
CTD-2306M5.1	134.908	-1.99274	0.20054	-9.93684	2.87811e-23	5.43141e-22
CTD-2308L22.1	15.498	2.21816	0.511507	4.33651	1.44763e-05	7.31028e-05
CTD-2311M21.2	956.99	5.65043	0.193171	29.2509	4.37675e-188	2.01938e-185
CTD-2311M21.3	52.3744	1.51484	0.31862	4.75438	1.99056e-06	1.13328e-05
CTD-2334D19.1	9.66284	1.78094	0.587104	3.03343	0.00241793	0.00804955
CTD-2354A18.1	91.0737	-4.1378	0.313787	-13.1867	1.04733e-39	3.49232e-38
CTD-2377D24.6	5.76299	1.80661	0.672619	2.68593	0.00723277	0.0214478
CTD-2396E7.11	6.09436	-2.8867	0.689915	-4.18414	2.86247e-05	0.000138191
CTD-2501M5.1	21.332	-3.08574	0.501955	-6.14744	7.87448e-10	6.4549e-09
CTD-2587M23.1	20.3334	-2.50855	0.474724	-5.28424	1.26229e-07	8.32249e-07
CTD-2619J13.19	9.17699	1.48121	0.595573	2.48703	0.0128813	0.0356103
CTD-2626G11.2	9.87961	-1.80535	0.60704	-2.97403	0.00293919	0.00957621
CTD-2630F21.1	33.2293	-1.01447	0.373005	-2.71972	0.00653376	0.0196247
CTD-3064M3.7	27.3981	1.0051	0.396142	2.53721	0.011174	0.0314292
CTD-3076O17.2	3.67965	1.67366	0.70841	2.36256	0.0181493	0.048075
CTD-3113P16.11	169.504	1.00557	0.171405	5.86664	4.44716e-09	3.40588e-08
CTDSPL	2061.19	1.14081	0.107127	10.6491	1.75967e-26	3.74953e-25
CTF1	28.191	1.23349	0.378014	3.26308	0.00110209	0.00397258
CTHRC1	40.3	3.05813	0.450626	6.78641	1.1496e-11	1.10596e-10
CTSB	2130.09	2.0658	0.0951135	21.7193	1.34929e-104	1.69471e-102
CTSC	8324.12	-1.20872	0.0713344	-16.9444	2.11648e-64	1.28628e-62
CTSH	235.278	-1.11575	0.158993	-7.01762	2.25685e-12	2.29833e-11
CTSK	1439.92	1.56564	0.101485	15.4272	1.07415e-53	5.18897e-52
CTSO	88.4661	1.2049	0.240572	5.00849	5.48594e-07	3.36844e-06
CTSS	8.87274	2.90177	0.659233	4.40174	1.07386e-05	5.51268e-05
CTTNBP2	1103.19	-2.02638	0.105126	-19.2757	8.59979e-83	7.68474e-81
CUBN	24.3876	1.70969	0.417133	4.09867	4.1553e-05	0.000195389
CUEDC1	1341.59	1.5961	0.140997	11.3201	1.044e-29	2.50827e-28
CUZD1	154.985	-6.94388	0.470114	-14.7706	2.2654e-49	9.68169e-48
CXCL12	1307.67	-1.80826	0.510665	-3.541	0.000398619	0.00156404
CXCL14	116.316	3.47949	0.54919	6.33568	2.36298e-10	2.0484e-09
CXCL3	27.02	-2.37812	0.425906	-5.58368	2.35479e-08	1.6794e-07
CXCL5	97.0806	-4.89785	0.351742	-13.9245	4.49432e-44	1.69629e-42
CXCL6	40.5593	-4.26124	0.454536	-9.37491	6.92376e-21	1.1796e-19
CXCR4	1618.79	6.7566	0.441829	15.2924	8.59828e-53	4.07526e-51
CXorf57	200.067	1.30548	0.182875	7.13865	9.42527e-13	9.89719e-12
CYB5A	817.086	-1.37105	0.105334	-13.0162	9.89623e-39	3.20996e-37
CYCSP45	4.97559	-2.87595	0.707982	-4.06217	4.86178e-05	0.00022593
CYP1B1	825.032	4.47872	0.184181	24.3169	1.29889e-130	2.50985e-128
CYP1B1-AS1	222.841	-3.41334	0.213299	-16.0026	1.2254e-57	6.45779e-56
CYP26A1	444.837	1.17318	0.157174	7.46424	8.37788e-14	9.50362e-13
CYP27B1	76.2822	1.00407	0.273626	3.66948	0.000243045	0.000991391
CYP2A13	26.2479	-4.07747	0.52429	-7.77713	7.41889e-15	9.00302e-14
CYP2A6	6.71974	-1.96564	0.63778	-3.082	0.00205616	0.0069542
CYP2B6	14.0598	-4.05786	0.628571	-6.45569	1.0773e-10	9.61532e-10
CYP2D7	34.6121	1.19847	0.402925	2.97442	0.00293544	0.00956674
CYP2J2	33.0477	-2.94868	0.412427	-7.14958	8.70447e-13	9.17011e-12
CYP2S1	2901.41	-3.85599	0.111064	-34.7187	4.11405e-264	3.87543e-261
CYP4X1	70.9163	-2.81413	0.29456	-9.55366	1.25193e-21	2.20262e-20
CYS1	4.86701	2.72786	0.710072	3.84166	0.000122204	0.00052856
CYYR1	1505.37	1.29249	0.104516	12.3664	3.97312e-35	1.13846e-33
DAAM2	191.917	1.05108	0.166193	6.32443	2.54174e-10	2.19243e-09
DACH1	859.697	8.20588	0.351992	23.3127	3.29515e-120	5.39831e-118
DACT1	2205.03	5.78647	0.172426	33.5592	6.62055e-247	4.40228e-244
DACT3	149.089	1.69619	0.210228	8.06832	7.12697e-16	9.2389e-15
DAZL	178.898	-1.23295	0.263944	-4.67127	2.99346e-06	1.66281e-05
DBNDD1	309.235	-1.5956	0.14276	-11.1768	5.2957e-29	1.23555e-27
DBNDD2	15.1858	-1.13263	0.48178	-2.35093	0.0187263	0.0493662
DBP	140.608	-1.4272	0.209532	-6.81136	9.66786e-12	9.36064e-11
DCAF12L1	107.949	-1.17325	0.211666	-5.54292	2.97461e-08	2.10222e-07
DCDC1	28.0279	1.69776	0.427549	3.97092	7.15967e-05	0.000323102
DCDC2	7.60073	1.75687	0.657094	2.6737	0.00750193	0.0221652
DCHS1	1899.83	1.22745	0.104627	11.7317	8.76891e-32	2.2631e-30
DCLK2	106.494	2.92536	0.298025	9.81581	9.62624e-23	1.77802e-21
DCLK3	16.862	-1.95846	0.481423	-4.06807	4.74047e-05	0.000220656
DDAH2	2807.14	1.08655	0.087406	12.4311	1.77224e-35	5.1566e-34
DDHD2	1081.17	1.28468	0.13388	9.5958	8.32682e-22	1.47303e-20
DDIT4	163.574	1.26478	0.194674	6.49693	8.1975e-11	7.39247e-10
DDIT4L	40.0863	-1.51818	0.34852	-4.35609	1.32403e-05	6.72216e-05
DDN	7.15543	1.82832	0.625886	2.92117	0.0034872	0.0111559
DDR1	3982.15	-1.14476	0.0999675	-11.4514	2.31491e-30	5.63959e-29
DDR2	1066.91	1.06649	0.276395	3.85856	0.000114058	0.00049638
DDX25	211.306	-2.12057	0.19305	-10.9845	4.53552e-28	1.02642e-26
DEF6	116.764	-1.23298	0.209249	-5.89241	3.80597e-09	2.92971e-08
DENND1C	47.0633	-3.10025	0.358955	-8.63688	5.77693e-18	8.41526e-17
DENND6B	112.19	1.81508	0.249388	7.27811	3.38523e-13	3.67242e-12
DES	252.66	3.00832	0.211346	14.2341	5.63097e-46	2.25718e-44
DFNA5	159.243	1.2178	0.178211	6.8335	8.28677e-12	8.0788e-11
DGAT2	37.4879	-1.30887	0.353538	-3.70221	0.000213728	0.000882066
DGKB	91.2002	-6.25733	0.486461	-12.863	7.27215e-38	2.28029e-36
DGKK	117.129	-3.1044	0.269089	-11.5367	8.61479e-31	2.1379e-29
DHX58	19.0931	-1.32289	0.439868	-3.00747	0.0026343	0.00868168
DIAPH2	348.942	-1.17581	0.183051	-6.42343	1.33237e-10	1.17895e-09
DIO2	13.6555	1.55972	0.538226	2.89789	0.00375684	0.0119357
DIO3	43.7148	4.48323	0.486373	9.21768	3.03602e-20	5.01376e-19
DIO3OS	46.6545	4.02224	0.42873	9.38176	6.48804e-21	1.1087e-19
DIRAS2	4.05505	2.16717	0.706967	3.06545	0.0021734	0.00730649
DIRAS3	17.8654	3.96027	0.598339	6.61877	3.62202e-11	3.3629e-10
DISC1	133.429	1.23017	0.193578	6.35492	2.08534e-10	1.81607e-09
DKFZP434L187	28.2641	2.04007	0.41865	4.87296	1.09937e-06	6.49795e-06
DKK1	1842.83	9.38117	0.39339	23.847	1.08868e-125	1.93802e-123
DKK2	108.428	3.80986	0.341962	11.1412	7.90496e-29	1.8311e-27
DLC1	882.714	4.78393	0.165936	28.8299	9.06161e-183	3.79379e-180
DLEU7	95.7381	-1.8393	0.238237	-7.72046	1.1591e-14	1.39388e-13
DLG5-AS1	24.553	-2.04841	0.417832	-4.90246	9.46426e-07	5.62038e-06
DLGAP1	202.887	-1.39609	0.177385	-7.87039	3.53525e-15	4.3939e-14
DLGAP1-AS2	304.065	-1.18257	0.221373	-5.34196	9.19482e-08	6.16113e-07
DLGAP2	32.3346	-2.11924	0.410106	-5.16754	2.372e-07	1.52174e-06
DLL1	855.856	5.44917	0.490738	11.104	1.19926e-28	2.75257e-27
DLL3	1857.48	4.9429	0.296942	16.646	3.2348e-62	1.87039e-60
DLX1	5.42822	1.73027	0.67371	2.56827	0.0102207	0.0290983
DLX3	73.1869	4.32972	0.378628	11.4353	2.78566e-30	6.77185e-29
DLX4	15.8479	2.14668	0.517306	4.14972	3.3288e-05	0.000159208
DMD	755.322	2.01128	0.135521	14.841	7.95349e-50	3.4646e-48
DMKN	1672.01	-1.97642	0.104676	-18.8813	1.62386e-79	1.35469e-77
DMP1	4.44922	-2.74532	0.710916	-3.86167	0.000112615	0.000490843
DMPK	997.466	1.12699	0.130241	8.65315	5.0096e-18	7.32581e-17
DMRT1	9.13022	-2.26093	0.627804	-3.60133	0.000316588	0.00126658
DMRT2	27.9139	5.06675	0.618389	8.19347	2.53809e-16	3.37336e-15
DMTN	166.548	6.25939	0.412133	15.1878	4.26177e-52	1.96633e-50
DMXL2	1053.49	1.28008	0.119412	10.7198	8.21774e-27	1.77447e-25
DNAH10OS	11.0984	1.9986	0.572025	3.4939	0.000476016	0.00183962
DNAH12	3.60015	1.92798	0.713703	2.70138	0.00690524	0.0205927
DNAH5	81.6104	1.75999	0.384444	4.578	4.69433e-06	2.5299e-05
DNAH6	12.6413	1.79652	0.528533	3.39908	0.000676134	0.00254343
DNAH7	40.6878	2.42187	0.426182	5.68272	1.3257e-08	9.71838e-08
DNAH9	123.217	1.93577	0.226932	8.53017	1.46139e-17	2.06882e-16
DNAI1	18.4549	1.47169	0.483178	3.04584	0.0023203	0.00776132
DNAJB13	6.26088	1.5643	0.654618	2.38963	0.0168652	0.0451709
DNAJC15	230.897	5.12499	0.27755	18.4651	3.94027e-76	3.10389e-74
DNAJC6	101.927	-1.45834	0.215187	-6.77707	1.22638e-11	1.17583e-10
DNASE2	125.481	-1.63339	0.205976	-7.93	2.19146e-15	2.76015e-14
DNM3	68.0573	1.25674	0.265354	4.73608	2.17889e-06	1.23676e-05
DNMT3B	15226.5	-2.16586	0.0745945	-29.0351	2.37195e-185	1.03125e-182
DOC2A	73.2511	-1.29426	0.252443	-5.12694	2.94483e-07	1.86908e-06
DOC2B	122.069	3.90685	0.285789	13.6704	1.52573e-42	5.50139e-41
DOCK11	404.675	1.13024	0.141533	7.98573	1.39697e-15	1.77831e-14
DOCK2	98.0623	-1.92757	0.226069	-8.52646	1.50894e-17	2.13347e-16
DOCK8	58.7402	1.39389	0.292193	4.77045	1.8381e-06	1.05472e-05
DOK2	14.3666	-2.64448	0.549232	-4.81487	1.47299e-06	8.57178e-06
DOK5	173.301	-2.75648	0.194628	-14.1628	1.55565e-45	6.13789e-44
DOK6	32.9513	1.28673	0.410724	3.13283	0.00173129	0.00596481
DPF3	23.5161	2.08457	0.524623	3.97346	7.08361e-05	0.000319972
DPP10-AS1	18.6861	-1.79336	0.45483	-3.94292	8.04968e-05	0.000359943
DPP6	226.981	-1.50133	0.169508	-8.85696	8.22266e-19	1.25947e-17
DPPA2	13.326	-1.22817	0.502638	-2.44345	0.0145475	0.0397257
DPPA3	8.93706	-3.12732	0.650053	-4.81087	1.50275e-06	8.73146e-06
DPPA4	12979.9	-2.5137	0.0797627	-31.5147	5.45547e-218	2.9366e-215
DPY19L2P1	87.9332	1.04007	0.264498	3.93222	8.41646e-05	0.000375156
DPY19L2P2	131.325	1.93442	0.226237	8.55043	1.22634e-17	1.74591e-16
DPYD	22.7332	1.55013	0.44172	3.50931	0.000449267	0.00174339
DPYSL4	982.822	1.03261	0.117961	8.75376	2.06366e-18	3.06942e-17
DPYSL5	1347.13	1.83641	0.109581	16.7585	4.91081e-63	2.87626e-61
DRAM1	110.947	1.64947	0.225003	7.3309	2.28615e-13	2.50534e-12
DRAXIN	835.346	-1.23104	0.10694	-11.5115	1.15443e-30	2.85238e-29
DRC1	26.3606	3.07358	0.540898	5.68236	1.32848e-08	9.73244e-08
DRC7	15.5475	2.13865	0.544457	3.92804	8.56415e-05	0.000381213
DSC3	160.796	2.47582	0.284579	8.69993	3.32078e-18	4.90373e-17
DSCAM	36.1725	-4.13468	0.458661	-9.01469	1.97433e-19	3.13233e-18
DSG4	3.3457	2.25318	0.716796	3.1434	0.00166995	0.0057799
DSP	9936.08	4.43734	0.0773778	57.3464	0	0
DTX3L	119.865	-1.49974	0.203104	-7.38411	1.53478e-13	1.71012e-12
DUOX1	42.6438	1.00326	0.316876	3.16611	0.00154493	0.00538924
DUSP13	23.2158	-2.29577	0.449359	-5.10899	3.23885e-07	2.04593e-06
DUSP15	59.6383	1.56015	0.288466	5.40841	6.35862e-08	4.33783e-07
DUSP16	1365.34	-1.0301	0.129664	-7.9444	1.9513e-15	2.46177e-14
DUSP2	130.319	-1.29367	0.204995	-6.31075	2.77686e-10	2.38523e-09
DUSP26	124.153	2.60052	0.240079	10.8319	2.42941e-27	5.34802e-26
DUSP4	770.441	1.71021	0.120906	14.1449	2.00865e-45	7.89766e-44
DUSP8	50.6514	3.18745	0.363713	8.76363	1.89058e-18	2.81941e-17
DUSP9	16.256	-1.77487	0.475013	-3.73646	0.000186629	0.000778614
DUX4L50	13.9431	2.00766	0.545716	3.67894	0.000234205	0.000958528
DYNC1I1	29.5781	1.29196	0.385055	3.35526	0.000792909	0.00293918
DYRK3	380.264	1.1029	0.155578	7.08906	1.35026e-12	1.39646e-11
EAF2	78.4887	-1.24557	0.239481	-5.20114	1.98075e-07	1.28018e-06
EBF2	24.1112	3.74085	0.540332	6.92325	4.41397e-12	4.41162e-11
EBF4	19.0869	2.72201	0.524749	5.18726	2.13414e-07	1.375e-06
ECEL1	142.927	1.71262	0.19911	8.60141	7.87431e-18	1.13318e-16
ECHDC2	46.9389	-1.27159	0.345385	-3.68167	0.000231707	0.000949337
ECHDC3	120.144	-2.44936	0.225946	-10.8405	2.21373e-27	4.88274e-26
ECM1	325.432	1.86625	0.157077	11.8811	1.48368e-32	3.91859e-31
EDAR	327.565	7.21954	0.594776	12.1382	6.62306e-34	1.8238e-32
EDARADD	111.043	2.16284	0.242348	8.92448	4.47782e-19	6.94815e-18
EDN1	40.5926	2.65873	0.412472	6.44584	1.14961e-10	1.02405e-09
EDN3	30.9736	3.18851	0.456128	6.9904	2.74105e-12	2.77021e-11
EEF1A2	55.4119	-2.00336	0.315318	-6.35344	2.10552e-10	1.83295e-09
EFCAB1	105.092	4.15273	0.337886	12.2903	1.02098e-34	2.89253e-33
EFCC1	20.1389	2.45001	0.557725	4.39286	1.11868e-05	5.73624e-05
EFEMP1	1114.56	1.25165	0.0904997	13.8305	1.6694e-43	6.17707e-42
EFEMP2	358.669	2.14534	0.146884	14.6057	2.58383e-48	1.08579e-46
EFHD1	149.031	2.02289	0.305311	6.62568	3.45659e-11	3.21327e-10
EFNA1	139.267	1.77938	0.219867	8.09299	5.82157e-16	7.57709e-15
EFNA3	98.2538	1.20648	0.285945	4.21927	2.45098e-05	0.000119628
EFNA4	780.01	1.00063	0.104855	9.54293	1.38857e-21	2.43544e-20
EFNB2	1731.47	1.51135	0.150011	10.0749	7.13384e-24	1.37966e-22
EGFLAM	2246.27	9.27485	0.323232	28.6941	4.52505e-181	1.82683e-178
EGLN3	199.548	-2.49511	0.210869	-11.8325	2.65007e-32	6.9424e-31
EGR1	883.11	2.75704	0.457759	6.0229	1.71315e-09	1.36137e-08
EGR2	48.2151	2.65529	0.346318	7.66721	1.75777e-14	2.0817e-13
EGR3	24.9651	3.76715	0.546516	6.89304	5.4613e-12	5.40583e-11
EHBP1	1528.34	-1.11728	0.114419	-9.76477	1.59473e-22	2.9217e-21
EIF2AK2	1296.26	-1.13693	0.128499	-8.84773	8.9319e-19	1.36349e-17
ELAVL2	412.287	-1.67868	0.130367	-12.8766	6.09599e-38	1.91947e-36
ELF3	27.5887	-1.6134	0.390506	-4.13156	3.60304e-05	0.000171345
ELFN1	501.266	4.2734	0.186296	22.9387	1.90866e-116	2.93544e-114
ELFN2	11.4392	-1.25971	0.533922	-2.35935	0.0183068	0.048424
ELL2	455.754	1.1556	0.146017	7.91415	2.48944e-15	3.12673e-14
ELMSAN1	604.82	1.26312	0.120289	10.5007	8.57509e-26	1.79008e-24
ELOVL2	83.927	2.3437	0.310436	7.54969	4.36285e-14	5.02472e-13
ELOVL7	60.8829	-2.66146	0.305296	-8.71763	2.84074e-18	4.19762e-17
EMB	923.929	-1.62341	0.109484	-14.8279	9.6734e-50	4.2057e-48
EME2	950.947	-1.39795	0.165552	-8.4442	3.06145e-17	4.24794e-16
EMID1	147.253	1.87063	0.210253	8.89703	5.73591e-19	8.85776e-18
EMILIN1	1382.54	1.26481	0.0984535	12.8468	8.96512e-38	2.79949e-36
EML5	15.1301	-1.18716	0.477438	-2.48653	0.0128997	0.035648
EMX1	73.5132	-6.3405	0.536674	-11.8144	3.28722e-32	8.60156e-31
EN1	16.2301	4.37525	0.645913	6.77374	1.25493e-11	1.20116e-10
EN2	33.4954	4.81816	0.55941	8.61293	7.12181e-18	1.02882e-16
ENC1	5682.56	2.05754	0.0706485	29.1236	1.80225e-186	8.14907e-184
ENG	118.456	-1.67678	0.212581	-7.88773	3.07741e-15	3.8354e-14
ENHO	107.425	-1.92899	0.239187	-8.06477	7.33748e-16	9.50634e-15
ENKUR	42.9964	2.42676	0.452999	5.3571	8.45697e-08	5.69203e-07
ENO2	1852.35	-1.77478	0.111303	-15.9455	3.06378e-57	1.60338e-55
ENPP1	608.268	-1.49248	0.122073	-12.2261	2.25561e-34	6.31125e-33
ENPP2	666.953	3.53678	0.452686	7.81288	5.58966e-15	6.87547e-14
ENPP5	164.564	-2.39828	0.196222	-12.2222	2.36512e-34	6.6013e-33
ENPP7P11	3.78804	-2.14652	0.710601	-3.02071	0.00252179	0.00835962
ENPP7P4	2.16848	-1.80907	0.710121	-2.54756	0.0108479	0.0306044
ENTPD2	3.52636	-1.81893	0.707804	-2.56982	0.0101751	0.0289903
EOGT	1657.69	1.40738	0.345797	4.06996	4.70211e-05	0.000219141
EOMES	95.419	3.53735	0.581791	6.08012	1.20096e-09	9.68999e-09
EPB41	4873.27	1.08818	0.0848066	12.8313	1.09527e-37	3.40134e-36
EPB41L4B	534.203	-2.85223	0.133251	-21.405	1.20021e-101	1.43568e-99
EPCAM	1575.18	-4.06167	0.148709	-27.3129	2.98251e-164	9.11196e-162
EPHA1	2940.67	-4.66871	0.388229	-12.0256	2.6056e-33	7.02115e-32
EPHA1-AS1	43.3043	-2.76084	0.376098	-7.34073	2.12437e-13	2.33598e-12
EPHA2	2506.77	1.35577	0.101596	13.3447	1.27124e-40	4.34798e-39
EPHA4	3244.54	3.814	0.11944	31.9325	9.45732e-224	5.77868e-221
EPHA5	13.4369	1.32535	0.513034	2.58336	0.00978429	0.0280252
EPHA7	346.657	1.0505	0.156557	6.71003	1.94588e-11	1.83761e-10
EPHA8	22.7864	-3.0313	0.482981	-6.27622	3.46895e-10	2.93731e-09
EPHB3	1862.22	1.82064	0.132916	13.6976	1.04879e-42	3.8182e-41
EPHX3	157.857	-3.07303	0.211374	-14.5384	6.92366e-48	2.89335e-46
EPPK1	55.8349	-1.66227	0.312601	-5.31756	1.0517e-07	6.98907e-07
EPS8	142.444	1.27384	0.190562	6.68464	2.31493e-11	2.17523e-10
EPS8L2	257.661	1.0045	0.19154	5.24435	1.56831e-07	1.02504e-06
ERBB2	9700.54	-2.42775	0.0743608	-32.6483	8.48396e-234	5.32793e-231
ERG	337.792	-5.80266	0.255915	-22.6742	8.05768e-114	1.16774e-111
ERICD	32.4437	-1.30805	0.367128	-3.56293	0.000366733	0.00145127
ERICH2	40.4337	2.94311	0.385441	7.63568	2.24627e-14	2.64636e-13
ERICH3	2.846	2.00206	0.715665	2.79748	0.00515035	0.0158831
ERICH5	9.9986	-2.55779	0.605178	-4.22651	2.37339e-05	0.000116167
ERMN	11.3709	2.00285	0.584447	3.42691	0.000610485	0.0023138
ERRFI1	658.074	-1.06661	0.105219	-10.1371	3.78262e-24	7.38494e-23
ERVH-1	119.135	-4.95487	0.351258	-14.1061	3.48348e-45	1.36489e-43
ERVH48-1	98.8252	-2.00496	0.262035	-7.65152	1.9862e-14	2.34363e-13
ERVMER34-1	675.333	-1.34098	0.129572	-10.3493	4.21523e-25	8.55458e-24
ERVV-1	4.77904	-1.71064	0.687017	-2.48995	0.0127762	0.0353585
ERVV-2	6.21465	-2.22637	0.668418	-3.3308	0.000865955	0.00318489
ESRG	4078.77	-5.88942	0.282987	-20.8116	3.39879e-96	3.69422e-94
ESRP1	762.958	-8.08884	0.327487	-24.6997	1.07681e-134	2.26095e-132
ESRP2	180.257	-5.4881	0.308528	-17.788	8.75333e-71	6.18422e-69
ESRRB	15.9474	-1.14036	0.470649	-2.42294	0.0153953	0.0417335
ESYT3	50.1071	-1.91994	0.313523	-6.12375	9.13971e-10	7.44615e-09
ETNK2	326.912	-2.00565	0.148397	-13.5154	1.26859e-41	4.42595e-40
ETNPPL	17.7929	-2.25291	0.48947	-4.60275	4.16951e-06	2.26651e-05
ETS1	373.386	-1.20389	0.168807	-7.13172	9.91228e-13	1.03461e-11
ETS2	1028.11	-1.94457	0.100161	-19.4143	5.83849e-84	5.27987e-82
ETV1	1667.49	-1.50575	0.0858011	-17.5493	6.02615e-69	4.07902e-67
ETV3L	32.7926	-2.28008	0.379203	-6.01283	1.82315e-09	1.4427e-08
ETV6	482.067	-1.22197	0.118888	-10.2784	8.82235e-25	1.76979e-23
EVA1A	45.1131	1.59243	0.317298	5.01871	5.20204e-07	3.20108e-06
EVA1B	183.766	1.14798	0.191157	6.00541	1.90843e-09	1.50807e-08
EVA1C	17.5552	-1.98763	0.482997	-4.1152	3.86846e-05	0.000182852
EVX1	1047.86	9.34468	0.447971	20.86	1.23679e-96	1.37065e-94
EVX1-AS	712.952	9.00424	0.475139	18.9507	4.35361e-80	3.68638e-78
EWSAT1	19.8119	-3.70566	0.543652	-6.81623	9.34602e-12	9.07234e-11
EXOC3L2	121.431	2.82139	0.250505	11.2628	2.00355e-29	4.76804e-28
EYA2	22.1902	-1.15382	0.408278	-2.82606	0.00471239	0.0146323
EYA4	54.869	5.13257	0.496321	10.3412	4.58603e-25	9.29041e-24
EZR	4448.58	-1.49105	0.073437	-20.3037	1.19201e-91	1.19244e-89
F10	144.799	1.01911	0.190654	5.34534	9.02462e-08	6.05426e-07
F11	11.5956	-1.29671	0.550203	-2.35679	0.0184338	0.0487088
F11R	1891.71	-2.37474	0.0973554	-24.3925	2.05426e-131	4.0385e-129
F13A1	273.766	2.08618	0.247937	8.41414	3.95791e-17	5.45946e-16
F2RL1	349.418	2.1608	0.156778	13.7826	3.24528e-43	1.19689e-41
F2RL2	63.9107	1.83906	0.287761	6.39092	1.64889e-10	1.44882e-09
F7	20.6569	-1.75699	0.442874	-3.96725	7.27072e-05	0.000327574
FAAH	160.077	-1.35359	0.193703	-6.98798	2.78872e-12	2.81713e-11
FABP6	39.9757	-2.00405	0.349486	-5.73429	9.79243e-09	7.26098e-08
FAIM2	53.3131	2.46911	0.325005	7.59714	3.02745e-14	3.53353e-13
FAM101A	205.751	-1.36533	0.424155	-3.21893	0.0012867	0.00456809
FAM101B	145.414	-1.07288	0.198921	-5.39349	6.91032e-08	4.69154e-07
FAM107A	13.9099	3.32524	0.607716	5.4717	4.45735e-08	3.09306e-07
FAM110C	115.467	-3.38504	0.262758	-12.8827	5.63091e-38	1.77798e-36
FAM110D	94.7529	1.99448	0.248508	8.0258	1.00864e-15	1.29711e-14
FAM111A	581.726	-1.84818	0.119448	-15.4727	5.30434e-54	2.56789e-52
FAM124A	1181.73	-4.65589	0.124652	-37.3511	2.43243e-305	3.66617e-302
FAM124B	19.5529	-2.43849	0.484614	-5.03183	4.85817e-07	2.99845e-06
FAM127C	174.117	1.24566	0.174132	7.15358	8.45464e-13	8.92356e-12
FAM129A	233.279	-4.69949	0.236045	-19.9093	3.38072e-88	3.29445e-86
FAM131B	1005.05	-1.7408	0.121357	-14.3445	1.1538e-46	4.67477e-45
FAM13B	1557.58	1.23748	0.105022	11.7831	4.76962e-32	1.24373e-30
FAM13C	24.7156	2.21893	0.453351	4.89452	9.85472e-07	5.84458e-06
FAM151B	17.371	1.22458	0.465054	2.6332	0.00845834	0.024633
FAM155B	497.065	-1.73019	0.137935	-12.5435	4.31619e-36	1.27891e-34
FAM159B	118.689	-2.12895	0.231241	-9.20662	3.36566e-20	5.53388e-19
FAM160A1	117.452	-1.9214	0.217379	-8.83894	9.66342e-19	1.47217e-17
FAM161B	51.7269	1.29671	0.293303	4.42107	9.82132e-06	5.06132e-05
FAM162A	950.764	-1.16119	0.0970211	-11.9684	5.2027e-33	1.39198e-31
FAM163A	46.2544	3.84939	0.491171	7.83717	4.6082e-15	5.69924e-14
FAM167A	91.1895	3.00887	0.352328	8.53997	1.34255e-17	1.90535e-16
FAM174B	332.106	-1.4633	0.203455	-7.19229	6.37135e-13	6.80092e-12
FAM178B	22.834	1.60423	0.427481	3.75274	0.000174909	0.000734735
FAM179A	60.253	1.39632	0.306224	4.55979	5.12036e-06	2.74446e-05
FAM183A	12.7088	2.31653	0.578397	4.00509	6.19928e-05	0.000283024
FAM184A	397.396	-2.25226	0.140489	-16.0315	7.69511e-58	4.06475e-56
FAM189A2	103.393	-1.98917	0.232873	-8.54187	1.32069e-17	1.87715e-16
FAM198B	25.2988	3.45993	0.572642	6.04204	1.52176e-09	1.21655e-08
FAM19A1	38.6338	3.33103	0.675681	4.92989	8.22741e-07	4.9286e-06
FAM19A2	41.4497	1.32203	0.324527	4.0737	4.62713e-05	0.000216003
FAM20A	9.3953	-2.11923	0.590017	-3.59181	0.000328388	0.0013103
FAM20C	418.891	-3.26291	0.43822	-7.44584	9.6328e-14	1.0878e-12
FAM219A	656.696	1.55811	0.173556	8.97755	2.76875e-19	4.34996e-18
FAM220CP	48.1217	-3.70903	0.381452	-9.72346	2.39496e-22	4.34552e-21
FAM222A	471.088	3.18728	0.15449	20.631	1.44685e-94	1.54294e-92
FAM222A-AS1	6.81484	1.89082	0.645337	2.92997	0.00338995	0.0108756
FAM3B	14.7354	-1.56954	0.511034	-3.07129	0.00213135	0.00718116
FAM3C2	11.5795	1.62976	0.548746	2.96997	0.00297831	0.00968483
FAM46B	913.444	-2.40839	0.106531	-22.6075	3.6602e-113	5.23734e-111
FAM46C	306.254	3.92988	0.532675	7.37763	1.61126e-13	1.79269e-12
FAM47E	35.3457	1.72999	0.363398	4.76059	1.93025e-06	1.10088e-05
FAM53B	931.76	1.32958	0.108253	12.2821	1.12966e-34	3.18842e-33
FAM57B	524.554	-1.07309	0.119224	-9.00058	2.24519e-19	3.53724e-18
FAM65A	18.2603	3.57186	0.563849	6.33478	2.37682e-10	2.05961e-09
FAM65B	835.021	-5.69554	0.1742	-32.6954	1.81417e-234	1.17185e-231
FAM71E1	35.5885	-1.05008	0.33655	-3.12013	0.0018077	0.0062063
FAM78A	135.004	-1.63069	0.194898	-8.36688	5.91646e-17	8.10171e-16
FAM78B	107.915	1.06278	0.22511	4.72116	2.34505e-06	1.3241e-05
FAM81A	24.8275	1.60527	0.446641	3.59409	0.000325532	0.00130006
FAM81B	5.17778	1.66837	0.707456	2.35826	0.0183608	0.0485384
FAM83B	13.6171	-1.64355	0.531777	-3.09067	0.00199704	0.00677913
FAM83F	116.78	-3.39947	0.247235	-13.7499	5.09701e-43	1.87676e-41
FAM83G	579.888	-1.66847	0.116435	-14.3296	1.42896e-46	5.77922e-45
FAM84B	1120.68	1.09512	0.0945209	11.586	4.85041e-31	1.21572e-29
FAM86GP	118.308	-1.44607	0.202759	-7.13198	9.89374e-13	1.03315e-11
FAM86HP	41.8912	1.05386	0.321159	3.28143	0.00103282	0.00374801
FAM89A	30.9186	1.65162	0.406616	4.06186	4.8683e-05	0.000226187
FAM92A1	713.587	1.07942	0.121444	8.88818	6.21178e-19	9.56648e-18
FAM92B	14.9926	2.43295	0.557383	4.36495	1.2715e-05	6.47289e-05
FANK1	32.3897	1.52273	0.389153	3.91293	9.11818e-05	0.000403966
FAR2	543.384	-1.36413	0.165211	-8.25689	1.49511e-16	2.00602e-15
FAR2P2	367.324	-2.05748	0.168374	-12.2197	2.44024e-34	6.8026e-33
FAS	111.195	2.31339	0.233441	9.90998	3.76736e-23	7.06826e-22
FAT2	61.7696	1.29018	0.289147	4.46201	8.11951e-06	4.23353e-05
FAT3	759.767	-2.54448	0.146984	-17.3112	3.86966e-67	2.49246e-65
FATE1	6.40445	-3.26495	0.695337	-4.69549	2.6597e-06	1.48801e-05
FBLN1	7208.02	1.45368	0.0827044	17.5769	3.70519e-69	2.53839e-67
FBLN7	194.687	4.5796	0.266748	17.1683	4.58804e-66	2.86537e-64
FBN1	1747.27	1.45125	0.103736	13.9899	1.79704e-44	6.86275e-43
FBN2	4124.05	2.65753	0.100227	26.5151	6.50014e-155	1.72889e-152
FBN3	2725.09	1.37435	0.105356	13.0448	6.80294e-39	2.23548e-37
FBP1	12.771	-2.09349	0.532474	-3.93162	8.43759e-05	0.000376024
FBRS	906.912	1.46682	0.112458	13.0433	6.94323e-39	2.27496e-37
FBXL14	625.318	1.19448	0.153555	7.77885	7.31868e-15	8.88618e-14
FBXL21	9.42576	1.53833	0.616691	2.4945	0.0126136	0.0350027
FBXL22	25.496	-1.45771	0.400619	-3.63865	0.000274066	0.00110803
FBXO2	77.2151	-1.95657	0.274201	-7.13554	9.64049e-13	1.01044e-11
FBXO40	3.19299	-2.29984	0.716817	-3.2084	0.00133475	0.0047209
FBXW4P1	12.6767	-1.23113	0.522184	-2.35765	0.0183909	0.0486011
FCGBP	30.3246	-1.6811	0.39947	-4.20831	2.57285e-05	0.000124902
FCGR2A	42.681	2.23153	0.351016	6.35735	2.05261e-10	1.78895e-09
FCGR2C	4.01628	2.5078	0.713971	3.51246	0.000443975	0.00172493
FCGRT	324.442	-1.50178	0.152383	-9.8553	6.5024e-23	1.20893e-21
FCHO1	405.45	-1.45922	0.145862	-10.0041	1.46143e-23	2.78818e-22
FCHSD2	750.66	1.12471	0.115617	9.72791	2.29264e-22	4.16991e-21
FCRL5	7.65578	-3.1392	0.671496	-4.67494	2.94039e-06	1.63574e-05
FCRLB	9.00088	2.28811	0.621266	3.68297	0.000230531	0.000945202
FERMT1	97.5503	-1.25321	0.239088	-5.24161	1.59178e-07	1.04009e-06
FEZ1	722.179	-2.29452	0.141738	-16.1885	6.08189e-59	3.30527e-57
FGD3	87.5373	-2.53726	0.268196	-9.46049	3.06504e-21	5.29774e-20
FGD5	823.663	-1.73625	0.10034	-17.3037	4.41395e-67	2.83496e-65
FGF1	24.03	1.01214	0.414493	2.44187	0.0146115	0.0398735
FGF10	105.134	5.55775	0.482708	11.5137	1.12575e-30	2.78762e-29
FGF13-AS1	48.2002	-1.51425	0.31171	-4.85787	1.18653e-06	6.98207e-06
FGF16	11.0107	-3.76571	0.646304	-5.82652	5.6594e-09	4.29067e-08
FGF17	2277.97	10.0425	0.412876	24.3233	1.11164e-130	2.16654e-128
FGF19	191.021	3.91846	0.272828	14.3624	8.91095e-47	3.62989e-45
FGF2	1034.64	-1.45874	0.130377	-11.1886	4.63618e-29	1.08729e-27
FGF21	2.29428	-1.85696	0.711434	-2.61016	0.00904998	0.0261807
FGF23	18.6552	-1.7671	0.494271	-3.57517	0.000349997	0.00138991
FGF3	13.9038	3.96286	0.671291	5.90335	3.56201e-09	2.74753e-08
FGF4	145.011	6.27751	0.491538	12.7712	2.37586e-37	7.25858e-36
FGF8	255.824	7.19166	0.486502	14.7824	1.90345e-49	8.18123e-48
FGF9	190.105	5.01227	0.489481	10.24	1.3126e-24	2.61687e-23
FGFBP1	16.2606	2.41294	0.521059	4.63083	3.64196e-06	1.99606e-05
FGFBP3	2002.88	-1.14554	0.115749	-9.89676	4.29986e-23	8.05395e-22
FGFR2	1166.52	-3.63351	0.136214	-26.675	9.18968e-157	2.53366e-154
FGFR3	325.972	-1.01289	0.161372	-6.2767	3.45836e-10	2.92944e-09
FGFRL1	347.507	1.76356	0.14929	11.813	3.34609e-32	8.74547e-31
FGL1	5.65098	2.57123	0.693855	3.70572	0.00021079	0.000871054
FHDC1	1011.97	-2.76583	0.112694	-24.5428	5.16546e-133	1.06164e-130
FIBCD1	44.6925	1.30961	0.32361	4.04688	5.19048e-05	0.000240169
FIGNL2	286.088	1.34643	0.144722	9.30357	1.35813e-20	2.28627e-19
FILIP1L	391.536	6.87315	0.399227	17.2162	2.00841e-66	1.26479e-64
FKBP7	308.454	1.42676	0.155722	9.16227	5.08157e-20	8.29489e-19
FKBP9	876.033	1.63935	0.112987	14.5092	1.05885e-47	4.40856e-46
FLI1	10.3074	-2.88632	0.613591	-4.70399	2.5513e-06	1.43126e-05
FLJ12825	600.07	6.79594	0.585235	11.6123	3.56763e-31	8.96189e-30
FLJ16779	11.7991	1.55235	0.542349	2.86227	0.00420618	0.013224
FLJ35934	42.498	-1.41238	0.341157	-4.13995	3.47376e-05	0.000165615
FLRT2	449.38	1.15193	0.159694	7.21338	5.45804e-13	5.85367e-12
FLRT3	268.397	3.29543	0.209411	15.7367	8.47621e-56	4.28703e-54
FLT1	1740.44	-5.47102	0.123792	-44.1954	0	0
FLVCR1	2361.27	-1.10852	0.10873	-10.1952	2.08299e-24	4.11286e-23
FMN1	375.992	3.93667	0.207615	18.9614	3.5552e-80	3.02165e-78
FMNL1	141.898	-1.25217	0.187774	-6.66849	2.5845e-11	2.42149e-10
FMOD	39.4491	2.40296	0.372039	6.45891	1.05462e-10	9.4203e-10
FN1	13421.8	3.29724	0.240705	13.6982	1.0403e-42	3.79341e-41
FNDC5	477.136	3.56726	0.149925	23.7936	3.88806e-125	6.76164e-123
FOS	236.041	1.15327	0.161575	7.13766	9.49353e-13	9.95962e-12
FOSL2	162.954	1.47597	0.186529	7.91284	2.51585e-15	3.1564e-14
FOXA1	5.19335	1.78204	0.698526	2.55115	0.0107369	0.0303538
FOXA3	201.392	-2.15668	0.181804	-11.8627	1.84913e-32	4.86106e-31
FOXB1	1840.78	3.30668	0.096076	34.4173	1.38917e-259	1.12166e-256
FOXC1	317.308	7.51996	0.509836	14.7498	3.08709e-49	1.31685e-47
FOXC2	35.0432	3.0809	0.703214	4.38117	1.18043e-05	6.03238e-05
FOXD1	13.3357	3.13592	0.629563	4.9811	6.32242e-07	3.84343e-06
FOXD3	181.099	-5.69539	0.328773	-17.3232	3.14558e-67	2.03769e-65
FOXD3-AS1	535.587	-7.66745	0.339924	-22.5564	1.16295e-112	1.61301e-110
FOXF1	21.2528	4.68956	0.633822	7.39886	1.37362e-13	1.53509e-12
FOXF2	22.2106	3.83984	0.550429	6.9761	3.03487e-12	3.05895e-11
FOXL1	8.81056	2.52506	0.665779	3.79264	0.000149057	0.000634389
FOXN3	1923.55	-1.22922	0.0962925	-12.7655	2.55664e-37	7.80034e-36
FOXO1	1013.9	-2.3998	0.107039	-22.4198	2.52078e-111	3.47499e-109
FOXO6	27.3781	-1.76615	0.401997	-4.39343	1.11578e-05	5.72268e-05
FOXP4	591.564	-1.38514	0.34142	-4.057	4.97072e-05	0.000230614
FOXS1	43.4772	1.50528	0.330614	4.55298	5.28922e-06	2.82692e-05
FPR2	7.58178	-2.77635	0.662995	-4.18759	2.81932e-05	0.000136282
FRAT2	306.441	-1.21009	0.142671	-8.48171	2.21902e-17	3.10828e-16
FREM1	718.578	2.99545	0.145545	20.5808	4.07573e-94	4.32601e-92
FRMD4B	319.503	1.27969	0.134743	9.49724	2.15537e-21	3.75412e-20
FRMD5	148.505	-1.59028	0.199329	-7.97817	1.48523e-15	1.88641e-14
FRMD6	514.578	1.30511	0.14622	8.92569	4.42947e-19	6.88258e-18
FRMD7	8.71063	2.48839	0.624277	3.98604	6.71853e-05	0.000304822
FRMPD2	16.5434	1.24185	0.473973	2.62008	0.008791	0.0255
FRRS1L	39.6313	1.11279	0.375325	2.96486	0.00302823	0.00983159
FRZB	618.804	3.87337	0.341207	11.352	7.25208e-30	1.75166e-28
FSCN1	16615.1	1.394	0.0993128	14.0364	9.32939e-45	3.58705e-43
FSTL4	85.292	-1.22526	0.259701	-4.71794	2.38244e-06	1.3432e-05
FUOM	201.253	-1.255	0.178142	-7.04496	1.85519e-12	1.89869e-11
FUT1	60.3459	-3.20796	0.322879	-9.93547	2.91811e-23	5.5023e-22
FUT2	52.5373	-3.04131	0.354028	-8.59057	8.65354e-18	1.24136e-16
FUT9	473.147	-1.31388	0.125088	-10.5037	8.30524e-26	1.73856e-24
FZD1	544.675	3.0491	0.329344	9.25811	2.08081e-20	3.46668e-19
FZD10	3886.04	8.5933	0.220283	39.0103	0	0
FZD10-AS1	206.449	5.7667	0.332408	17.3483	2.03335e-67	1.32861e-65
FZD5	287.385	-3.53228	0.174324	-20.2627	2.74215e-91	2.73104e-89
FZD7	4040.81	-1.65204	0.0740144	-22.3205	2.33848e-110	3.20415e-108
FZD8	132.237	-2.56474	0.213446	-12.0159	2.93247e-33	7.89253e-32
FZD9	148.265	1.75255	0.233895	7.49287	6.73812e-14	7.68983e-13
GAB2	349.272	1.92795	0.136806	14.0926	4.21646e-45	1.64923e-43
GABBR2	38.6783	1.6567	0.343032	4.82959	1.36815e-06	7.98636e-06
GABRA2	25.6836	1.5977	0.434414	3.67782	0.000235235	0.000962394
GABRA4	33.5141	3.72743	0.466094	7.99716	1.27323e-15	1.62536e-14
GABRA5	146.382	-3.9394	0.251561	-15.6598	2.84805e-55	1.40894e-53
GABRB2	121.606	1.07333	0.216321	4.96176	6.9857e-07	4.21941e-06
GABRB3	3981.87	-2.07231	0.0743366	-27.8773	5.02514e-171	1.80331e-168
GABRD	36.5714	-2.08525	0.381093	-5.47177	4.45568e-08	3.09285e-07
GABRE	298.144	-2.74858	0.164364	-16.7226	8.97573e-63	5.2435e-61
GABRG2	12.8462	-1.90158	0.528616	-3.59729	0.000321547	0.00128482
GABRG3	17.4588	2.75461	0.519896	5.29838	1.16833e-07	7.73458e-07
GABRP	42.2081	-2.87096	0.3628	-7.91334	2.50568e-15	3.14539e-14
GABRQ	314.271	-1.36188	0.137339	-9.91624	3.53852e-23	6.64441e-22
GAD1	1825.3	8.60456	0.29646	29.0244	3.24111e-185	1.38255e-182
GADD45A	533.122	1.76562	0.15715	11.2353	2.73661e-29	6.48525e-28
GAL	43.9394	-2.31553	0.335846	-6.89464	5.40017e-12	5.35e-11
GAL3ST3	371.439	-1.16922	0.132738	-8.80847	1.26865e-18	1.91466e-17
GAL3ST4	149.805	1.3179	0.196814	6.69616	2.13974e-11	2.01228e-10
GALNT10	1096.6	1.41985	0.138669	10.2391	1.32405e-24	2.63505e-23
GALNT12	224.52	-1.02399	0.165125	-6.20129	5.6002e-10	4.64792e-09
GALNT14	146.146	-1.23906	0.234782	-5.27751	1.30952e-07	8.61633e-07
GALNT5	13.577	1.87532	0.536263	3.49701	0.000470501	0.00181955
GALNT6	115.771	-4.29967	0.29092	-14.7796	1.98447e-49	8.51324e-48
GALNT7	2877.45	-1.22044	0.0868393	-14.054	7.27897e-45	2.81766e-43
GALR1	21.2221	-3.2166	0.510134	-6.3054	2.87447e-10	2.46252e-09
GAP43	870.829	1.97761	0.118932	16.6281	4.35977e-62	2.51443e-60
GAS6-AS2	8.25078	-1.47338	0.623251	-2.36402	0.0180776	0.0479243
GBGT1	144.153	-1.5328	0.191096	-8.02106	1.04835e-15	1.34742e-14
GCA	601.034	-1.01506	0.114856	-8.83768	9.77246e-19	1.48778e-17
GCAT	367.987	1.26811	0.127649	9.93437	2.95029e-23	5.55835e-22
GCK	72.8174	-2.92494	0.295744	-9.8901	4.59581e-23	8.59405e-22
GCNT1	392.481	1.88154	0.142329	13.2197	6.75743e-40	2.27002e-38
GCNT2	939.727	-2.42948	0.124205	-19.5602	3.37968e-85	3.15735e-83
GCNT4	425.649	3.51867	0.169855	20.7157	2.5002e-95	2.67888e-93
GCSAM	217.586	2.84789	0.197008	14.4557	2.3082e-47	9.54e-46
GDF10	177.581	3.59696	0.305815	11.7619	6.13631e-32	1.58911e-30
GDF15	87.0774	1.82193	0.302105	6.03079	1.63164e-09	1.30116e-08
GDF3	72.2756	-6.56708	0.562566	-11.6734	1.74241e-31	4.45111e-30
GDNF	183.564	6.05643	0.383724	15.7833	4.05541e-56	2.06963e-54
GDNF-AS1	91.2328	5.68503	0.45754	12.4252	1.907e-35	5.54157e-34
GDPD2	811.09	-3.75604	0.293459	-12.7992	1.65646e-37	5.10651e-36
GET4	61.1618	-1.03213	0.269756	-3.82618	0.000130148	0.000559707
GFAP	13.9395	-1.87203	0.506284	-3.69758	0.000217664	0.000897165
GFPT2	3042.2	-1.75903	0.0778756	-22.5877	5.71876e-113	8.08061e-111
GFRA3	34.9686	1.24001	0.350025	3.54264	0.000396144	0.00155595
GFY	6.94364	-2.13019	0.645062	-3.3023	0.000958968	0.00350588
GGH	1339.67	1.02042	0.112441	9.07512	1.1355e-19	1.82585e-18
GGNBP1	5.81421	-2.0073	0.677129	-2.96443	0.00303244	0.00984173
GGT1	140.04	-1.91808	0.197445	-9.71447	2.61603e-22	4.73145e-21
GGT8P	21.0622	-1.77666	0.484901	-3.66396	0.000248347	0.0010111
GHET1	17.6759	-1.06514	0.444822	-2.39454	0.0166412	0.0446185
GHRHR	30.3293	-2.7883	0.41635	-6.69701	2.12727e-11	2.00139e-10
GIP	50.3214	1.52615	0.312767	4.8795	1.06353e-06	6.29594e-06
GIPC2	5.80551	-2.53744	0.680829	-3.72698	0.000193786	0.000805945
GIPR	6.45696	1.69141	0.67146	2.519	0.0117688	0.032917
GJA3	23.0111	1.719	0.425233	4.04248	5.28893e-05	0.000244474
GJA4	14.3947	-2.04943	0.515063	-3.97898	6.92107e-05	0.000313256
GJB2	1.94662	-1.6768	0.704782	-2.37917	0.0173515	0.0462653
GJB3	3.18932	-2.2504	0.716872	-3.13919	0.00169414	0.00585554
GKAP1	173.098	-1.03584	0.189061	-5.4789	4.27974e-08	2.97437e-07
GLB1L3	972.317	-4.57948	0.128461	-35.6487	2.47208e-278	2.42995e-275
GLCCI1	578.699	-1.0089	0.180094	-5.60206	2.11825e-08	1.51741e-07
GLDC	1365.31	-2.41185	0.138424	-17.4237	5.45578e-68	3.59604e-66
GLIPR1	123.099	2.9902	0.283798	10.5364	5.87293e-26	1.23627e-24
GLIPR1L1	16.9108	-3.49533	0.558703	-6.25615	3.94595e-10	3.31883e-09
GLIPR2	1291.37	2.60403	0.108236	24.0588	6.76054e-128	1.22274e-125
GLIS1	8.77679	1.50862	0.591735	2.54949	0.0107879	0.0304752
GLIS3	32.2743	2.04609	0.377694	5.41731	6.0501e-08	4.13985e-07
GLP1R	37.2942	-2.90797	0.384255	-7.56782	3.79532e-14	4.39122e-13
GLRA4	51.067	2.311	0.341446	6.76826	1.30341e-11	1.24651e-10
GLRB	28.2007	1.51884	0.3907	3.8875	0.000101284	0.000444885
GLT1D1	131.404	-1.41568	0.206342	-6.86083	6.84618e-12	6.70617e-11
GLUL	14143.6	1.73399	0.227283	7.62923	2.36155e-14	2.77639e-13
GLYATL1P2	23.6986	1.13984	0.43205	2.63822	0.00833434	0.0243148
GMNC	6.044	1.63453	0.669421	2.44171	0.0146179	0.0398843
GMPR	266.219	2.7094	0.176079	15.3875	1.98654e-53	9.47502e-52
GNA14	16.1236	-2.51572	0.512427	-4.90942	9.13453e-07	5.43314e-06
GNA15	2.71671	-1.70166	0.716859	-2.37378	0.0176071	0.0468308
GNAI1	737.284	1.29181	0.106559	12.123	7.97653e-34	2.18851e-32
GNAO1	461.532	-1.30098	0.13116	-9.91905	3.44009e-23	6.47035e-22
GNAQP1	37.7019	-1.08976	0.336459	-3.23891	0.00119988	0.0042868
GNG11	220.487	1.34353	0.183062	7.33921	2.14855e-13	2.35931e-12
GNG12-AS1	40.1715	4.37747	0.483805	9.048	1.45604e-19	2.32638e-18
GNG4	637.646	-1.11941	0.161743	-6.92094	4.48651e-12	4.48017e-11
GOLGA6A	15.0741	-3.86534	0.60921	-6.34484	2.22661e-10	1.93538e-09
GOLGA6B	3.95238	-2.19146	0.707954	-3.09548	0.00196497	0.00668131
GOLGA6D	4.94406	-2.62566	0.698976	-3.75644	0.000172346	0.000724505
GOLT1A	49.0642	-5.38978	0.516018	-10.4449	1.5456e-25	3.18532e-24
GPC3	3712.71	1.23105	0.326506	3.77036	0.000163012	0.000688339
GPC4	3752.77	-2.03387	0.0806237	-25.2267	2.04213e-140	4.48238e-138
GPCPD1	803.791	1.24964	0.103785	12.0407	2.17208e-33	5.88805e-32
GPM6A	187.477	-1.03311	0.172283	-5.99655	2.01551e-09	1.59046e-08
GPM6B	2955.35	-1.25073	0.0851794	-14.6835	8.22007e-49	3.47363e-47
GPNMB	14.3158	-2.95827	0.560362	-5.27921	1.29741e-07	8.54163e-07
GPR1	14.5725	-1.64192	0.500823	-3.27846	0.00104377	0.00378104
GPR137B	188.586	1.46991	0.178206	8.2484	1.60527e-16	2.14491e-15
GPR149	2.83675	1.97626	0.715184	2.76329	0.00572223	0.0174351
GPR153	487.277	1.14322	0.125029	9.14362	6.03942e-20	9.80885e-19
GPR155	51.1852	1.90589	0.328028	5.81014	6.24208e-09	4.71346e-08
GPR160	87.1361	-4.10747	0.324374	-12.6628	9.50645e-37	2.84665e-35
GPR161	2348.97	1.15163	0.0897884	12.8261	1.17156e-37	3.62333e-36
GPR162	433.254	1.94337	0.134701	14.4273	3.48575e-47	1.43023e-45
GPR176	788.455	-4.60642	0.151664	-30.3724	1.27034e-202	6.52724e-200
GPR26	10.8943	-4.02517	0.664208	-6.06011	1.36031e-09	1.09133e-08
GPR39	6.5082	-2.43051	0.661227	-3.67576	0.000237146	0.00096916
GPR50	94.7093	1.17201	0.293342	3.99538	6.45899e-05	0.000294168
GPR55	77.0908	4.82299	0.416054	11.5922	4.51244e-31	1.13227e-29
GPR85	26.1666	1.57225	0.412358	3.81284	0.000137381	0.00058891
GPRC5B	1953.01	-1.14914	0.0957112	-12.0063	3.29283e-33	8.83087e-32
GPRIN2	258.417	-1.8319	0.18102	-10.1199	4.50876e-24	8.77984e-23
GPRIN3	30.3373	-3.35948	0.444399	-7.55961	4.04282e-14	4.66327e-13
GRAMD3	79.0791	-1.64991	0.273147	-6.04037	1.53758e-09	1.22832e-08
GRAP2	7.08708	1.75318	0.639447	2.74171	0.00611204	0.0184783
GRB7	296.382	-4.04027	0.188439	-21.4408	5.5636e-102	6.76247e-100
GREB1	2841.74	2.15605	0.102662	21.0013	6.37715e-98	7.28155e-96
GREB1L	4766.16	4.50721	0.268621	16.7791	3.4706e-63	2.03801e-61
GREM1	980.666	4.91167	0.337589	14.5492	5.90482e-48	2.47674e-46
GRHL1	56.8284	-1.27195	0.278282	-4.57073	4.86027e-06	2.61186e-05
GRHL2	17.9202	-4.69205	0.635983	-7.37764	1.61119e-13	1.79269e-12
GRHL3	61.5089	2.21741	0.29949	7.40394	1.32198e-13	1.47884e-12
GRIA1	159.247	1.66686	0.189122	8.81366	1.21125e-18	1.8325e-17
GRIA2	3.52566	2.22191	0.716873	3.09945	0.00193879	0.00660557
GRIA3	103.148	1.27575	0.226106	5.64227	1.6782e-08	1.21372e-07
GRIA4	520.999	-5.67616	0.204608	-27.7416	2.19934e-169	7.64963e-167
GRID1	18.7136	2.25511	0.505312	4.46281	8.08917e-06	4.21966e-05
GRID2	469.788	-4.77595	0.197641	-24.1648	5.21473e-129	9.66349e-127
GRIK2	25.0083	-1.19008	0.3935	-3.02433	0.00249181	0.0082651
GRIK3	147.16	-2.00895	0.237684	-8.45219	2.859e-17	3.97517e-16
GRIK4	53.5753	-1.21662	0.285456	-4.26202	2.02587e-05	9.99364e-05
GRIN2A	844.542	5.04273	0.180661	27.9126	1.87418e-171	6.83412e-169
GRIN2B	90.9579	-4.80083	0.35653	-13.4654	2.49851e-41	8.63704e-40
GRIN3A	60.8404	3.11992	0.37101	8.40925	4.1264e-17	5.68146e-16
GRIP2	66.8042	1.52771	0.289234	5.28191	1.27847e-07	8.42179e-07
GRK5	198.945	1.79653	0.204174	8.79898	1.38061e-18	2.07947e-17
GRM4	793.845	-2.83446	0.354785	-7.98924	1.35776e-15	1.72937e-14
GRPR	13.6549	-1.85478	0.527555	-3.51579	0.00043844	0.00170489
GRTP1	562.766	-1.9977	0.122575	-16.2978	1.02308e-59	5.62768e-58
GSDMD	16.1472	-1.85742	0.482508	-3.84951	0.000118353	0.00051338
GSG1	15.9594	-2.69569	0.522115	-5.16303	2.4298e-07	1.55573e-06
GSG1L	8.47209	-1.64253	0.598661	-2.74368	0.00607555	0.0183803
GSN	82.5929	1.39972	0.256011	5.46741	4.56671e-08	3.16506e-07
GSTM3	164.245	1.22752	0.210442	5.83308	5.44128e-09	4.13084e-08
GSTO2	142.639	-2.25211	0.200456	-11.2349	2.74679e-29	6.50255e-28
GSTT2B	2.92294	-1.72577	0.716684	-2.40799	0.0160407	0.0432187
GSX1	2.20614	1.70237	0.707868	2.40492	0.0161759	0.043526
GTSF1	2.74297	-1.68676	0.716731	-2.35341	0.0186019	0.0490846
GUCA1A	88.6139	-3.26088	0.280169	-11.639	2.61118e-31	6.6033e-30
GUCY1A2	82.0007	1.5504	0.255976	6.05683	1.38834e-09	1.11304e-08
GUCY1A3	8.12766	2.98222	0.684107	4.35929	1.30485e-05	6.63221e-05
GUCY1B3	44.32	1.72763	0.435599	3.96611	7.30556e-05	0.000328947
GUCY2EP	4.12865	-2.6551	0.712679	-3.72552	0.000194915	0.000809893
GULP1	1443.11	-1.24873	0.114968	-10.8615	1.75745e-27	3.89153e-26
GXYLT1P4	2.36693	-1.86754	0.711636	-2.62429	0.00868292	0.0252188
GXYLT2	83.6704	1.5706	0.246739	6.36544	1.94734e-10	1.70114e-09
GYPC	919.738	1.9776	0.103713	19.0681	4.65147e-81	4.02914e-79
H19	194.502	2.01817	0.240521	8.39081	4.82786e-17	6.63516e-16
H1F0	1786.24	1.62152	0.275771	5.87995	4.10387e-09	3.15151e-08
H2AFY2	3061.09	1.76489	0.0894546	19.7295	1.20426e-86	1.13916e-84
H6PD	591.261	1.19713	0.112782	10.6145	2.55036e-26	5.41395e-25
HAGLR	729.369	8.93457	0.485255	18.4121	1.0507e-75	8.16297e-74
HAGLROS	13.4648	4.14261	0.6556	6.31881	2.63588e-10	2.26844e-09
HAPLN1	138.444	3.79211	0.303015	12.5146	6.21247e-36	1.83597e-34
HAPLN3	480.12	-1.48212	0.127068	-11.664	1.94694e-31	4.9568e-30
HAS2	1283.23	3.9676	0.417796	9.49649	2.17077e-21	3.77804e-20
HAS2-AS1	19.2047	2.09456	0.47156	4.44177	8.92221e-06	4.62115e-05
HCG22	34.6751	4.33616	0.504846	8.58908	8.76694e-18	1.25604e-16
HCK	42.8539	2.46787	0.478043	5.16244	2.43758e-07	1.56027e-06
HCLS1	13.2507	-2.47329	0.551465	-4.48494	7.29338e-06	3.82839e-05
HCP5	48.185	-2.36867	0.327919	-7.22335	5.07215e-13	5.44756e-12
HDAC9	229.922	-1.87061	0.173962	-10.753	5.7361e-27	1.25055e-25
HDC	53.6559	3.98155	0.427903	9.30479	1.34255e-20	2.26342e-19
HECW1	56.9723	-2.67208	0.315071	-8.48089	2.23481e-17	3.12846e-16
HECW2	268.108	1.44033	0.169107	8.51726	1.6337e-17	2.30553e-16
HEG1	1165.45	1.24046	0.0952416	13.0244	8.89308e-39	2.89287e-37
HERC5	118.697	-1.15291	0.204718	-5.63171	1.78433e-08	1.28759e-07
HERC6	27.8905	-1.35579	0.385238	-3.51935	0.000432604	0.00168423
HES2	2.77335	1.69588	0.716567	2.36668	0.0179486	0.0476381
HES4	31.9071	4.89607	0.596531	8.20756	2.25733e-16	3.00552e-15
HES6	710.157	1.40284	0.1516	9.2536	2.1705e-20	3.61345e-19
HES7	1293.1	9.48364	0.427443	22.1869	4.59372e-109	6.18184e-107
HESX1	48.5188	-1.9175	0.314349	-6.09992	1.06122e-09	8.60547e-09
HEY1	51.1141	1.1955	0.343499	3.48036	0.000500737	0.00192867
HEYL	149.627	1.45294	0.478479	3.03659	0.00239275	0.00797511
HGFAC	25.1869	1.91084	0.4233	4.51415	6.35708e-06	3.36268e-05
HGSNAT	786.97	1.77213	0.111666	15.8699	1.02368e-56	5.28388e-55
HHAT	116.74	2.38244	0.226854	10.5021	8.44616e-26	1.76643e-24
HHIP	42.9612	3.30372	0.435827	7.58035	3.44611e-14	4.00358e-13
HHIP-AS1	18.2198	1.92412	0.477462	4.0299	5.58007e-05	0.000256985
HHIPL2	285.195	5.17807	0.254521	20.3444	5.20881e-92	5.25717e-90
HHLA1	529.006	-4.53507	0.164307	-27.6012	1.07683e-167	3.52825e-165
HID1	26.8464	-1.41268	0.446199	-3.16602	0.00154538	0.00538999
HIP1R	111.75	1.52098	0.236845	6.42184	1.34638e-10	1.18995e-09
HIPK2	1963.29	1.49132	0.0854042	17.4619	2.79534e-68	1.85329e-66
HIST1H2AC	119.305	-1.33532	0.268734	-4.96892	6.73275e-07	4.07534e-06
HIST1H2APS4	7.17912	-1.48722	0.617251	-2.40942	0.015978	0.0430601
HIST1H3G	28.0943	-1.10469	0.425127	-2.59848	0.00936364	0.0269845
HIVEP2	256.048	2.00145	0.419093	4.77567	1.79112e-06	1.02985e-05
HIVEP3	63.2586	1.9122	0.326323	5.85983	4.63329e-09	3.53763e-08
HK1	4525.06	-1.67631	0.071545	-23.4302	2.10652e-121	3.50178e-119
HLA-DOA	508.96	-1.62526	0.131811	-12.3303	6.22509e-35	1.77209e-33
HLA-DPA1	155.183	-1.38004	0.18544	-7.44199	9.91828e-14	1.11892e-12
HLA-DPB1	329.868	-1.56689	0.134219	-11.6741	1.72806e-31	4.41946e-30
HLA-DPB2	99.1968	-5.93715	0.438549	-13.5382	9.30704e-42	3.25718e-40
HLA-DRA	9.24833	-2.73758	0.62024	-4.41375	1.01597e-05	5.23096e-05
HLA-F	19.0862	-3.01263	0.502059	-6.00054	1.96662e-09	1.55242e-08
HLA-F-AS1	14.2044	-2.04267	0.514509	-3.97014	7.18309e-05	0.000324013
HLA-G	11.2598	-3.18794	0.615613	-5.17848	2.23699e-07	1.43921e-06
HLA-V	4.25922	-2.14439	0.704112	-3.04552	0.00232277	0.00776823
HMCN1	951.562	1.32042	0.159671	8.2696	1.34407e-16	1.80658e-15
HMCN2	294.494	-3.53721	0.188272	-18.7878	9.50895e-79	7.87467e-77
HMGN2P15	25.8431	-1.2478	0.391655	-3.18596	0.00144275	0.00505936
HMGN5	1213.3	-1.37501	0.106238	-12.9428	2.58183e-38	8.23274e-37
HMOX1	603.496	-2.21246	0.120452	-18.368	2.36954e-75	1.82834e-73
HMSD	27.119	-1.12736	0.408212	-2.7617	0.00575009	0.0175152
HMX2	322.512	-7.79639	0.434198	-17.9558	4.32131e-72	3.14136e-70
HMX3	2.69823	-1.7064	0.716834	-2.38046	0.0172909	0.0461146
HNF4G	52.0128	-1.78976	0.312128	-5.73407	9.80513e-09	7.26802e-08
HNRNPA1P6	6.64719	1.68753	0.638564	2.64269	0.00822501	0.0240402
HOMER3	461.561	1.19687	0.135756	8.81634	1.18263e-18	1.79082e-17
HOOK1	1185.42	-2.53921	0.102939	-24.6672	2.40495e-134	4.98817e-132
HOOK2	536.983	-1.26593	0.13386	-9.45706	3.16716e-21	5.46171e-20
HOPX	2.56625	1.93191	0.714683	2.70317	0.00686822	0.020504
HOTAIRM1	328.394	8.04669	0.491029	16.3874	2.35247e-60	1.30675e-58
HOXA-AS2	244.424	7.46984	0.480297	15.5526	1.52879e-54	7.43287e-53
HOXA-AS3	1704.85	9.06547	0.509115	17.8063	6.31129e-71	4.48697e-69
HOXA1	1539.43	9.87163	0.437607	22.5582	1.11502e-112	1.55607e-110
HOXA13	4.26437	2.53432	0.713708	3.55092	0.000383892	0.00151308
HOXA2	173.516	7.43348	0.535962	13.8694	9.70803e-44	3.63376e-42
HOXA3	530.286	8.84049	0.5019	17.614	1.92205e-69	1.32078e-67
HOXA4	7.92537	3.41157	0.68657	4.96901	6.72971e-07	4.07459e-06
HOXA5	71.2123	6.07315	0.542856	11.1874	4.70046e-29	1.10122e-27
HOXA6	28.4439	5.09605	0.616489	8.26624	1.38256e-16	1.85721e-15
HOXA7	56.1795	4.97216	0.658609	7.54948	4.36984e-14	5.03021e-13
HOXA9	15.3133	2.19292	0.712911	3.07601	0.00209793	0.00708335
HOXB-AS1	61.516	5.88215	0.548847	10.7173	8.44413e-27	1.81988e-25
HOXB-AS2	34.8774	5.39963	0.60247	8.9625	3.1741e-19	4.97297e-18
HOXB-AS3	1299.3	7.83071	0.561578	13.9441	3.41672e-44	1.29824e-42
HOXB-AS4	37.1014	5.39664	0.607197	8.8878	6.23334e-19	9.59315e-18
HOXB1	2262.55	9.88371	0.379499	26.0441	1.56891e-149	3.89778e-147
HOXB2	868.83	9.2817	0.468289	19.8204	1.98392e-87	1.90862e-85
HOXB3	2238.73	9.74212	0.448804	21.7068	1.76894e-104	2.20952e-102
HOXB4	532.972	8.31817	0.4451	18.6883	6.16172e-78	5.06561e-76
HOXB5	151.723	7.26356	0.540351	13.4423	3.4166e-41	1.17568e-39
HOXB6	111.794	6.83568	0.556124	12.2916	1.00445e-34	2.84926e-33
HOXB7	96.8131	6.68032	0.559024	11.95	6.49445e-33	1.73349e-31
HOXB8	913.805	9.19237	0.447798	20.5279	1.21199e-93	1.2627e-91
HOXB9	6435.05	10.6137	0.389459	27.2524	1.55612e-163	4.62905e-161
HOXC-AS1	17.9773	4.40407	0.649713	6.77849	1.21441e-11	1.16484e-10
HOXC4	718.108	7.06466	0.578016	12.2222	2.36456e-34	6.6013e-33
HOXC5	25.6287	4.95285	0.622718	7.9536	1.81172e-15	2.28952e-14
HOXC6	280.285	7.69318	0.512475	15.0118	6.14527e-51	2.73489e-49
HOXC8	272.919	6.03202	0.649652	9.28499	1.61718e-20	2.71025e-19
HOXC9	39.1841	3.42107	0.71029	4.81644	1.46141e-06	8.50877e-06
HOXD-AS2	3.64692	2.37779	0.715773	3.32199	0.000893767	0.00328088
HOXD1	72.8141	6.32469	0.569624	11.1033	1.20914e-28	2.77244e-27
HOXD3	17.4504	4.27877	0.658275	6.49997	8.03344e-11	7.24741e-10
HOXD4	33.9069	5.20514	0.618652	8.41368	3.97356e-17	5.47769e-16
HOXD8	47.2479	3.53465	0.708969	4.98562	6.17642e-07	3.76379e-06
HOXD9	13.1973	4.00359	0.665614	6.01488	1.80017e-09	1.42601e-08
HPDL	95.714	-2.05624	0.238713	-8.61386	7.06418e-18	1.02114e-16
HPGD	34.8789	-4.60791	0.509289	-9.04772	1.4598e-19	2.33074e-18
HPN	23.6474	-1.27758	0.422316	-3.02518	0.00248489	0.0082494
HPS3	1089.79	-1.06683	0.104221	-10.2362	1.36538e-24	2.71252e-23
HPX	18.0791	1.64521	0.487969	3.37154	0.000747502	0.00278365
HR	20.2292	4.37631	0.609057	7.18538	6.702e-13	7.13365e-12
HRASLS	52.8828	-3.29935	0.348231	-9.4746	2.67775e-21	4.65324e-20
HRH2	336.616	-1.36958	0.195216	-7.01573	2.28749e-12	2.32744e-11
HRH3	12.7527	-1.46703	0.533626	-2.74918	0.00597443	0.0181156
HS3ST1	113.678	3.41575	0.360885	9.46491	2.93802e-21	5.08986e-20
HS3ST2	31.1869	-1.66795	0.464555	-3.59041	0.000330155	0.00131643
HS3ST4	206.667	-1.17029	0.183937	-6.36244	1.98573e-10	1.73266e-09
HS3ST5	169.882	-4.76554	0.271186	-17.5729	3.97033e-69	2.70365e-67
HS6ST1	1801.6	-1.16868	0.11522	-10.143	3.55819e-24	6.95277e-23
HS6ST3	11.216	-2.0358	0.56887	-3.57867	0.000345342	0.00137287
HSD11B1L	106.139	1.02711	0.230013	4.46543	7.9909e-06	4.17225e-05
HSD11B2	526.415	-4.83426	0.179358	-26.9532	5.23895e-160	1.49927e-157
HSD17B6	46.078	-1.34277	0.317011	-4.23571	2.27831e-05	0.000111659
HSH2D	2.49767	-1.99479	0.714786	-2.79075	0.00525856	0.0161771
HSPA12B	223.972	-1.10813	0.212846	-5.20624	1.92701e-07	1.24581e-06
HSPA6	5.54788	2.58113	0.693152	3.72376	0.000196279	0.000814814
HSPA7	4.02537	1.81704	0.705524	2.57545	0.010011	0.0285989
HSPB8	152.051	-1.23455	0.228144	-5.41127	6.2581e-08	4.27312e-07
HTATIP2	451.308	-1.78288	0.120482	-14.7979	1.51099e-49	6.51918e-48
HTR1A	11.2998	-4.05612	0.663448	-6.1137	9.73492e-10	7.90826e-09
HTR1D	29.2559	1.20273	0.445627	2.69895	0.00695586	0.0207355
HTR2C	9.63033	-3.19518	0.641058	-4.98423	6.2209e-07	3.78681e-06
HTR3A	136.919	-2.2766	0.204709	-11.1211	9.89974e-29	2.28148e-27
HTR7	1294.99	-3.98932	0.111556	-35.7606	4.52302e-280	4.86936e-277
HTR7P1	86.7522	-2.24547	0.247361	-9.07771	1.10884e-19	1.78551e-18
HTRA4	3.81538	-1.97254	0.710076	-2.77793	0.00547072	0.0167636
HUNK	417.478	1.53405	0.150604	10.186	2.28996e-24	4.50186e-23
HYDIN	70.2219	1.67362	0.271837	6.1567	7.42767e-10	6.0997e-09
ICA1	157.169	-2.57624	0.203343	-12.6695	8.73085e-37	2.62134e-35
ICA1L	181.609	1.8743	0.187485	9.99707	1.56976e-23	2.98982e-22
ICAM1	306.75	2.5758	0.162108	15.8894	7.50497e-57	3.89157e-55
ICAM3	14.6269	-4.12556	0.624669	-6.60439	3.99148e-11	3.69269e-10
ICAM5	22.3927	2.05529	0.444704	4.62172	3.80579e-06	2.07779e-05
ID1	241.704	1.83379	0.178316	10.2839	8.32503e-25	1.673e-23
ID2	601.395	-1.13003	0.117779	-9.59446	8.43592e-22	1.49116e-20
ID2-AS1	17.8831	1.33484	0.454202	2.93886	0.00329422	0.010594
ID4	106.944	1.75365	0.257364	6.8139	9.49898e-12	9.20501e-11
IDH2	2360.92	1.01825	0.080222	12.6929	6.47775e-37	1.95526e-35
IDNK	27.4546	1.19603	0.387972	3.08278	0.00205079	0.00693765
IDO1	107.142	-7.07535	0.546517	-12.9463	2.46667e-38	7.87661e-37
IER5L	291.958	3.36389	0.224277	14.9988	7.47478e-51	3.32003e-49
IFFO2	351.677	1.09444	0.131676	8.3116	9.44215e-17	1.27292e-15
IFI16	94.3339	1.41642	0.250959	5.64403	1.66114e-08	1.20292e-07
IFI27	29.1526	1.50115	0.377903	3.97232	7.1177e-05	0.000321401
IFI27L2	226.506	1.18714	0.163842	7.24565	4.30378e-13	4.63995e-12
IFI44	10.603	2.52267	0.61217	4.12086	3.77461e-05	0.00017864
IFI44L	96.8204	3.06488	0.2803	10.9343	7.901e-28	1.76508e-26
IFI6	117.613	1.15639	0.234695	4.9272	8.34148e-07	4.99164e-06
IFIT1	162.17	-1.18202	0.199105	-5.93665	2.90907e-09	2.25775e-08
IFITM1	309.485	-1.1965	0.148394	-8.06298	7.44537e-16	9.63508e-15
IFITM2	1187.26	-1.40442	0.108319	-12.9656	1.91618e-38	6.14482e-37
IFNLR1	199.192	-1.55418	0.172491	-9.01018	2.0571e-19	3.25223e-18
IGDCC3	7474.48	1.34198	0.0898704	14.9324	2.0291e-50	8.94229e-49
IGF2	347.091	4.99755	0.256832	19.4584	2.47235e-84	2.26295e-82
IGFBP1	8.94656	2.46286	0.697733	3.52981	0.000415865	0.00162381
IGFBP3	178.696	1.72352	0.582576	2.95844	0.00309199	0.0100048
IGFBP6	138.01	-1.7275	0.207098	-8.34148	7.3364e-17	9.95567e-16
IGFBP7	85.7937	4.17084	0.406881	10.2508	1.17423e-24	2.34721e-23
IGFBPL1	307.972	-1.11651	0.137461	-8.12238	4.57139e-16	5.9809e-15
IGFN1	45.1224	4.11194	0.473149	8.69058	3.60606e-18	5.32153e-17
IGIP	13.3182	1.30619	0.513036	2.54599	0.0108968	0.0307177
IGSF11	70.5223	2.11321	0.309685	6.82373	8.87088e-12	8.62222e-11
IGSF21	173.518	-1.31708	0.173886	-7.57441	3.60751e-14	4.18464e-13
IGSF5	42.678	-1.9928	0.331082	-6.01904	1.75452e-09	1.39228e-08
IGSF8	2376.84	-1.08882	0.141175	-7.71257	1.23308e-14	1.47891e-13
IKZF1	101.987	-2.61198	0.249618	-10.4639	1.26556e-25	2.63218e-24
IKZF2	116.411	1.28229	0.213108	6.01708	1.77592e-09	1.40828e-08
IKZF3	7.69105	-1.62126	0.628261	-2.58055	0.00986422	0.0282327
IL13RA1	1108	1.14064	0.103792	10.9896	4.28761e-28	9.72259e-27
IL13RA2	18.4997	3.63355	0.643472	5.6468	1.63464e-08	1.18487e-07
IL17B	4.99765	2.42841	0.700549	3.46643	0.000527413	0.00202097
IL17RC	237.941	-1.05501	0.160697	-6.56525	5.19448e-11	4.76417e-10
IL17RD	8896.9	1.72214	0.0672288	25.6161	1.00977e-144	2.3535e-142
IL17RE	41.6624	-1.0949	0.324903	-3.36991	0.000751922	0.00279918
IL1A	7.77852	-1.88254	0.632387	-2.97688	0.00291194	0.00949699
IL1R1	47.2165	1.5428	0.316964	4.86742	1.13066e-06	6.67064e-06
IL1RAPL1	2.82119	1.96904	0.714769	2.75479	0.00587299	0.0178511
IL20RA	11.3618	-2.04029	0.556259	-3.66788	0.000244569	0.000996793
IL23A	34.5704	1.01274	0.427897	2.36678	0.0179437	0.0476307
IL34	16.5316	-4.2913	0.617536	-6.94906	3.67721e-12	3.69486e-11
IL5RA	3.44696	2.25368	0.716786	3.14414	0.00166575	0.00576623
IL6R	35.2639	1.15286	0.350735	3.28698	0.00101268	0.00367844
ILDR1	8.62061	-3.35294	0.662049	-5.06449	4.09505e-07	2.54833e-06
ILDR2	478.206	3.93591	0.187528	20.9884	8.37046e-98	9.50952e-96
IMPG1	2.89863	1.74322	0.716252	2.43381	0.0149408	0.040633
INA	795.508	1.72504	0.12639	13.6485	2.06111e-42	7.38472e-41
INHBA	7.21705	-2.00087	0.648941	-3.08329	0.00204724	0.00692668
INHBC	4.7899	-1.84409	0.685937	-2.68842	0.00717903	0.0213081
INHBE	140.18	-1.06706	0.200023	-5.33469	9.57085e-08	6.39792e-07
INPP4B	263.849	1.37677	0.15621	8.81361	1.21178e-18	1.8325e-17
INSRR	11.553	1.52216	0.536875	2.83523	0.00457932	0.0142838
IP6K3	57.8883	2.34999	0.323321	7.2683	3.64043e-13	3.93982e-12
IPCEF1	20.0864	-1.25116	0.437547	-2.85949	0.00424329	0.0133239
IQCH	63.375	1.13465	0.282418	4.01763	5.87865e-05	0.000269038
IQSEC2	429.377	-1.37192	0.128631	-10.6655	1.47537e-26	3.14968e-25
IQSEC3	107.689	-1.70367	0.249252	-6.83511	8.19418e-12	7.99542e-11
IRF2	177.391	-1.1737	0.170261	-6.89355	5.44169e-12	5.38877e-11
IRF2BPL	2789.95	-1.17629	0.287954	-4.085	4.40765e-05	0.000206396
IRF6	24.6408	-3.09513	0.473349	-6.53879	6.20167e-11	5.64897e-10
IRF8	29.2161	1.05261	0.404096	2.60484	0.0091916	0.0265462
IRS4	155.817	2.09957	0.195144	10.7591	5.36977e-27	1.17181e-25
IRX2	784.976	-1.71383	0.138013	-12.4179	2.09037e-35	6.05109e-34
IRX3	29.2136	1.02642	0.399315	2.57045	0.0101565	0.0289484
IRX4	7.80998	-2.98867	0.656125	-4.55503	5.23778e-06	2.80208e-05
IRX5	6.76424	1.84128	0.654834	2.81183	0.00492608	0.0152393
ISCA2P1	4.28153	-2.70824	0.711591	-3.8059	0.000141288	0.00060415
ISLR	1399.76	1.41708	0.279642	5.06746	4.03152e-07	2.51156e-06
ISM1	62.2202	2.32263	0.384089	6.04712	1.47457e-09	1.18091e-08
ISPD	42.4264	1.30652	0.319128	4.09405	4.2391e-05	0.000198998
ITGA2	102.556	-4.09624	0.299379	-13.6825	1.29247e-42	4.66777e-41
ITGA3	266.627	-2.94987	0.180382	-16.3534	4.11215e-60	2.27304e-58
ITGA5	3751.06	1.13138	0.106493	10.6239	2.30608e-26	4.90459e-25
ITGA6	3872.66	-1.98576	0.266781	-7.44343	9.81061e-14	1.10733e-12
ITGA8	161.698	7.33969	0.538582	13.6278	2.7366e-42	9.77395e-41
ITGA9-AS1	39.9426	2.26625	0.359306	6.30731	2.83928e-10	2.43579e-09
ITGB2	126.671	3.16527	0.260904	12.1319	7.15656e-34	1.96831e-32
ITGB2-AS1	8.26802	2.16518	0.628101	3.44719	0.00056646	0.00215889
ITGB4	26.7467	-1.6645	0.414399	-4.01666	5.90298e-05	0.000270042
ITGB8	445.086	3.68467	0.161423	22.8262	2.51875e-115	3.74631e-113
ITIH5	56.0902	-1.0454	0.305481	-3.42213	0.000621322	0.0023506
ITLN2	17.2102	-2.64759	0.542361	-4.88161	1.05223e-06	6.23232e-06
ITM2A	664.706	1.26275	0.164231	7.68885	1.4846e-14	1.76651e-13
ITPK1	1784.9	-1.05584	0.0850581	-12.4131	2.21785e-35	6.4119e-34
ITPKB	561.31	1.09279	0.142447	7.67158	1.69889e-14	2.01408e-13
ITPR1	1209.42	3.48818	0.160771	21.6965	2.21216e-104	2.74794e-102
ITPR2	866.604	-1.13539	0.12926	-8.78378	1.58074e-18	2.36985e-17
ITPR3	1235.2	-3.79638	0.137044	-27.702	6.61002e-169	2.26423e-166
ITPRIPL2	243.59	1.73058	0.191229	9.04981	1.43223e-19	2.29157e-18
ITSN2	272.184	-1.24667	0.16408	-7.59796	3.00835e-14	3.51488e-13
JADE1	2864.98	-1.93619	0.0843988	-22.941	1.81175e-116	2.80548e-114
JADE2	1022.62	-1.18318	0.117863	-10.0386	1.03084e-23	1.98342e-22
JAKMIP1	77.7191	-1.58031	0.268559	-5.88441	3.99473e-09	3.07082e-08
JAKMIP2-AS1	14.2519	-2.1122	0.535021	-3.94789	7.88414e-05	0.00035296
JAKMIP3	73.3098	-3.23666	0.30977	-10.4486	1.48728e-25	3.07072e-24
JARID2	4647.51	-1.36826	0.0850498	-16.0877	3.1115e-58	1.6709e-56
JPH1	891.004	-1.2668	0.0989349	-12.8044	1.54962e-37	4.78603e-36
JPH2	130.705	1.94476	0.208981	9.30592	1.32834e-20	2.24114e-19
JPH3	380.849	-1.20198	0.138896	-8.65385	4.97904e-18	7.28584e-17
JPH4	2656.07	-1.09695	0.0868652	-12.6282	1.47667e-36	4.39272e-35
JUNB	68.412	1.68117	0.279453	6.01593	1.78853e-09	1.41778e-08
KANK4	970.66	6.68336	0.229743	29.0907	4.71213e-186	2.08886e-183
KAT2B	67.0947	1.62358	0.271813	5.97316	2.327e-09	1.8248e-08
KAT6A	1623.87	1.28271	0.113162	11.3352	8.7833e-30	2.11473e-28
KAT7	3320.15	-1.06046	0.0771591	-13.7437	5.55279e-43	2.03794e-41
KAZALD1	44.1558	1.64964	0.408366	4.0396	5.35419e-05	0.000247339
KB-1732A1.1	17.0773	2.13414	0.508155	4.19979	2.67164e-05	0.000129448
KB-68A7.1	12.4385	1.28967	0.535644	2.4077	0.0160531	0.0432419
KCNA2	241.098	2.0905	0.195626	10.6862	1.18146e-26	2.5318e-25
KCNB2	26.1308	1.37077	0.441487	3.1049	0.00190345	0.00649853
KCNC1	44.0158	1.13998	0.30938	3.68472	0.00022895	0.0009394
KCNC3	368.313	-1.01173	0.133985	-7.55107	4.31708e-14	4.97454e-13
KCND2	163.746	-2.23373	0.212394	-10.5169	7.2191e-26	1.51541e-24
KCNG3	22.0072	-1.84566	0.437571	-4.21796	2.46521e-05	0.000120271
KCNH1	6.59863	2.52228	0.674319	3.74048	0.000183666	0.000767527
KCNH2	483.009	1.96897	0.125517	15.6869	1.85833e-55	9.23365e-54
KCNH5	44.8399	1.1414	0.429726	2.65613	0.00790442	0.0232142
KCNH6	12.2047	-2.09191	0.555791	-3.76384	0.000167326	0.000705107
KCNH7	42.6504	2.54492	0.36056	7.05825	1.68618e-12	1.73436e-11
KCNJ11	98.3367	-2.25654	0.282051	-8.00048	1.2393e-15	1.58474e-14
KCNJ14	18.8731	1.43649	0.458443	3.13341	0.00172787	0.00595484
KCNJ3	12.1317	2.46346	0.569852	4.32299	1.53932e-05	7.73871e-05
KCNJ4	19.5653	2.06256	0.463967	4.44548	8.76966e-06	4.55152e-05
KCNJ5	16.5814	4.08684	0.623895	6.55054	5.73313e-11	5.23907e-10
KCNJ8	63.1017	2.69728	0.35501	7.59775	3.01315e-14	3.51867e-13
KCNK1	94.057	-2.95926	0.270539	-10.9384	7.55266e-28	1.68893e-26
KCNK10	32.0733	1.88707	0.373444	5.05314	4.34599e-07	2.70003e-06
KCNK12	31.9738	-1.48787	0.361287	-4.11826	3.81751e-05	0.000180595
KCNK5	1292.72	-1.88331	0.142493	-13.2169	7.01363e-40	2.35258e-38
KCNK6	57.3826	-2.9047	0.319359	-9.09542	9.42226e-20	1.52047e-18
KCNMB1	121.055	2.23454	0.231879	9.63667	5.59765e-22	9.97255e-21
KCNN2	118.812	-2.34434	0.244112	-9.60353	7.72497e-22	1.37193e-20
KCNQ4	95.914	-1.51902	0.234623	-6.4743	9.52551e-11	8.54914e-10
KCNQ5	77.1228	2.87908	0.395194	7.28524	3.21107e-13	3.48851e-12
KCNS1	43.5526	-2.29618	0.341059	-6.73251	1.66759e-11	1.58407e-10
KCP	965.33	2.05003	0.120029	17.0795	2.10901e-65	1.3099e-63
KCTD11	179.498	1.07735	0.178257	6.04379	1.50537e-09	1.20501e-08
KCTD8	155.488	-4.0477	0.265157	-15.2653	1.30215e-52	6.10767e-51
KDF1	32.0536	-4.78184	0.53784	-8.89083	6.06565e-19	9.34779e-18
KDM6A	1472.41	-1.00646	0.099085	-10.1576	3.06618e-24	6.01216e-23
KDM6B	752.397	2.23731	0.154664	14.4656	1.99892e-47	8.29203e-46
KDR	1198.96	-5.14293	0.134986	-38.0997	0	0
KEL	183.252	-3.58174	0.212577	-16.8492	1.06375e-63	6.29564e-62
KHDRBS2	176.572	-1.71923	0.179057	-9.60158	7.8729e-22	1.396e-20
KHDRBS3	1330.06	1.04839	0.112405	9.32693	1.08977e-20	1.83999e-19
KHK	143.089	-1.60465	0.192287	-8.34509	7.11627e-17	9.66854e-16
KIAA0040	171.723	-4.88793	0.276751	-17.6619	8.24879e-70	5.70301e-68
KIAA0226L	127.436	2.32728	0.224774	10.3539	4.01968e-25	8.16505e-24
KIAA0895	31.8119	4.33085	0.530888	8.15775	3.41332e-16	4.50224e-15
KIAA0922	1143.86	-1.43694	0.11129	-12.9116	3.8698e-38	1.22877e-36
KIAA1161	347.407	-1.55913	0.50072	-3.11377	0.0018471	0.00632238
KIAA1257	45.2478	1.04727	0.318484	3.28831	0.00100791	0.00366408
KIAA1456	264	1.76692	0.179438	9.84693	7.06684e-23	1.31064e-21
KIAA1462	498.601	1.0554	0.126346	8.35324	6.64153e-17	9.05073e-16
KIAA1549L	221.414	1.6636	0.201502	8.25602	1.50615e-16	2.01963e-15
KIAA1644	288.443	-1.42377	0.153582	-9.27046	1.8535e-20	3.0994e-19
KIAA1683	20.347	1.61019	0.445588	3.61363	0.000301935	0.00121117
KIAA1715	590.507	1.25277	0.153085	8.18351	2.75694e-16	3.65565e-15
KIAA1755	147.765	3.86097	0.61463	6.28178	3.34715e-10	2.83948e-09
KIAA2012	6.40291	2.05016	0.687218	2.98328	0.0028518	0.00932641
KIF12	18.7464	-1.24541	0.449813	-2.76874	0.00562736	0.0171938
KIF1A	3552.06	-2.08656	0.10955	-19.0466	7.01022e-81	6.02612e-79
KIF21A	1641.84	-2.19574	0.096654	-22.7175	3.00528e-114	4.38344e-112
KIF21B	1961.96	-2.63157	0.285645	-9.21274	3.17895e-20	5.2345e-19
KIF26A	1639.07	-1.93605	0.138069	-14.0223	1.13891e-44	4.37155e-43
KIF26B	1098.73	6.41042	0.232048	27.6254	5.50976e-168	1.83183e-165
KIF5A	691.179	-1.02771	0.103187	-9.95972	2.28707e-23	4.32687e-22
KIFAP3	446.555	1.04276	0.134139	7.77369	7.62319e-15	9.24598e-14
KIFC2	240.002	1.17854	0.163463	7.20986	5.60078e-13	6.00106e-12
KIRREL3	37.723	1.99526	0.360093	5.54097	3.00799e-08	2.12448e-07
KISS1R	16.1093	1.82172	0.489165	3.72415	0.000195975	0.000813699
KIT	281.815	1.62911	0.167391	9.73238	2.19392e-22	3.99357e-21
KITLG	259.204	2.17389	0.156107	13.9256	4.42561e-44	1.67315e-42
KIZ	442.449	-1.34351	0.124457	-10.7949	3.63679e-27	7.97483e-26
KLF14	2.28243	1.71122	0.707475	2.41877	0.0155733	0.042135
KLF2P2	4.38269	-1.77079	0.689005	-2.57006	0.010168	0.0289737
KLHDC1	5.86077	1.90341	0.661513	2.87736	0.00401013	0.0126562
KLHDC7A	657.093	-2.9893	0.16495	-18.1225	2.11849e-73	1.58592e-71
KLHL24	264.508	-1.08771	0.157664	-6.89893	5.23965e-12	5.20237e-11
KLHL36	635.012	-1.14439	0.119179	-9.60233	7.81587e-22	1.38698e-20
KLHL4	1152.95	-2.13186	0.311344	-6.84727	7.52723e-12	7.36054e-11
KLHL41	5.22322	2.21894	0.686664	3.23148	0.00123151	0.00438873
KLHL7	2786.88	-1.19949	0.0805825	-14.8852	4.11258e-50	1.7984e-48
KLK1	9.93102	-3.53585	0.654353	-5.40358	6.53249e-08	4.44973e-07
KLK10	22.4335	-3.30907	0.501241	-6.60176	4.06297e-11	3.75534e-10
KLK13	31.5764	-3.1469	0.453716	-6.93585	4.03792e-12	4.04293e-11
KLK5	78.4725	-2.02006	0.258667	-7.80953	5.74017e-15	7.04909e-14
KLK7	5.24665	-2.44552	0.690975	-3.53924	0.000401286	0.00157286
KLKB1	120.861	-3.35137	0.260072	-12.8863	5.37487e-38	1.70428e-36
KLRG2	67.1381	-3.29977	0.311395	-10.5967	3.08596e-26	6.52642e-25
KMT5A	451.814	1.44556	0.128521	11.2477	2.37745e-29	5.65188e-28
KNDC1	110.642	-1.65125	0.224661	-7.34997	1.98253e-13	2.18853e-12
KREMEN1	138.049	1.4126	0.231606	6.09915	1.06634e-09	8.64389e-09
KRT42P	11.9077	-4.12724	0.660517	-6.2485	4.14417e-10	3.48037e-09
KRT5	4.52577	1.86993	0.709421	2.63585	0.00839269	0.0244607
KRT7	68.6886	-5.43247	0.457605	-11.8715	1.66436e-32	4.38552e-31
KRT71	45.766	5.57771	0.605123	9.21747	3.04187e-20	5.01975e-19
KRT74	33.4855	5.34153	0.605111	8.82736	1.07171e-18	1.62613e-17
KRTAP13-4	15.0277	-1.29499	0.498796	-2.59623	0.00942522	0.0271377
KRTCAP3	174.669	-3.46417	0.214576	-16.1443	1.24577e-58	6.7218e-57
KSR2	20.8922	-1.29267	0.42949	-3.00978	0.00261433	0.00862341
L1TD1	24900.1	-2.40053	0.0840552	-28.559	2.16999e-179	8.45849e-177
LA16c-380H5.5	10.5751	-1.94481	0.57183	-3.40104	0.000671303	0.00252736
LACTB	206.352	-1.42793	0.169091	-8.44475	3.04685e-17	4.23116e-16
LAD1	94.1656	-5.87215	0.441485	-13.3009	2.2866e-40	7.76207e-39
LAG3	88.8338	1.06647	0.237313	4.49394	6.99176e-06	3.68204e-05
LAMA1	3171.06	1.28124	0.0820737	15.6108	6.14201e-55	3.02524e-53
LAMA4	23.2683	-1.65719	0.435356	-3.80652	0.000140934	0.000602767
LAMB1	3310.51	2.54815	0.0799727	31.8627	8.76956e-223	5.21743e-220
LAMC3	611.566	-2.67603	0.169937	-15.7472	7.18227e-56	3.64892e-54
LARGE2	621.964	-1.62538	0.167377	-9.71089	2.70952e-22	4.89271e-21
LARP7	3498.19	-1.26666	0.0812079	-15.5977	7.54877e-55	3.71006e-53
LAYN	21.3633	1.16755	0.431529	2.70561	0.00681785	0.0203751
LBH	233.679	-1.78709	0.159814	-11.1823	4.97619e-29	1.16341e-27
LBX1	75.1135	5.98684	0.558314	10.7231	7.93296e-27	1.7179e-25
LBX1-AS1	37.4329	5.42845	0.603846	8.9898	2.47678e-19	3.89667e-18
LCK	593.527	-7.41537	0.303199	-24.4571	4.22975e-132	8.53805e-130
LCN12	13.1782	-1.68574	0.517626	-3.25667	0.00112728	0.00405497
LCP1	57.3077	-2.30807	0.30934	-7.46127	8.56925e-14	9.71583e-13
LDHD	8.73577	-1.67375	0.588575	-2.84373	0.00445884	0.0139407
LDLRAD4	50.7422	-4.4973	0.429585	-10.4689	1.19985e-25	2.49782e-24
LECT1	10.8637	-3.21226	0.615322	-5.22045	1.78493e-07	1.15959e-06
LEF1	2827.67	8.23927	0.310737	26.5153	6.46281e-155	1.72889e-152
LEF1-AS1	29.9706	5.20756	0.609689	8.54133	1.32685e-17	1.88426e-16
LEFTY1	19.473	-4.26464	0.585732	-7.28088	3.31654e-13	3.60136e-12
LEFTY2	12.2405	-2.29755	0.560194	-4.10134	4.10763e-05	0.000193228
LEMD1	114.168	1.12516	0.219245	5.132	2.86681e-07	1.82212e-06
LFNG	1704.02	1.89638	0.100917	18.7916	8.85501e-79	7.36008e-77
LGALS1	1261.66	2.04724	0.0963819	21.2409	4.00137e-100	4.66304e-98
LGALS3BP	1145.88	-1.86275	0.140612	-13.2475	4.66688e-40	1.57241e-38
LGALS8	419.015	1.85482	0.139771	13.2704	3.43622e-40	1.16296e-38
LGALSL	1317.17	-1.26703	0.0967957	-13.0898	3.7667e-39	1.24499e-37
LGI1	11.9846	1.9661	0.578751	3.39715	0.000680913	0.00255928
LGI4	69.24	1.68767	0.284107	5.94027	2.84547e-09	2.20915e-08
LGR5	38.1137	4.44513	0.501672	8.86064	7.95579e-19	1.22025e-17
LHFPL3-AS2	5.67343	1.80301	0.670054	2.69084	0.00712723	0.0211794
LHFPL4	225.094	-3.36545	0.191924	-17.5353	7.7011e-69	5.19721e-67
LHX5	7.14378	-3.06856	0.675881	-4.54009	5.62296e-06	2.99397e-05
LHX8	6.08261	-3.16083	0.699413	-4.51927	6.20541e-06	3.28629e-05
LHX9	2.46331	1.85558	0.713101	2.60213	0.00926473	0.0267233
LIMCH1	737.178	5.25072	0.170403	30.8135	1.72942e-208	9.09271e-206
LIMS2	63.1224	1.09152	0.284521	3.83634	0.000124882	0.000539009
LINC-PINT	26.5985	-1.43047	0.390707	-3.66124	0.000251	0.00102117
LINC-ROR	4.25497	-2.08516	0.698155	-2.98668	0.00282028	0.00923534
LINC00029	8.65546	-3.67954	0.679413	-5.41576	6.10292e-08	4.17094e-07
LINC00092	13.5057	3.41616	0.639621	5.34091	9.24793e-08	6.19121e-07
LINC00235	57.8916	-1.61407	0.303171	-5.32396	1.01531e-07	6.76115e-07
LINC00261	399.382	4.17134	0.634761	6.57152	4.98041e-11	4.58285e-10
LINC00327	8.10069	1.41618	0.601791	2.35327	0.018609	0.0490971
LINC00336	2.13646	-1.79921	0.70981	-2.53477	0.0112521	0.0316127
LINC00337	48.5206	-1.71963	0.308509	-5.57398	2.4898e-08	1.77011e-07
LINC00342	101.972	1.04637	0.220037	4.75542	1.98036e-06	1.12781e-05
LINC00371	578.89	-6.40417	0.237713	-26.9408	7.31989e-160	2.0686e-157
LINC00428	9.40266	-3.79777	0.674593	-5.62973	1.80496e-08	1.30164e-07
LINC00471	19.9596	-1.15075	0.449154	-2.56204	0.0104059	0.0295586
LINC00475	3.65617	1.68734	0.707483	2.38499	0.0170794	0.0456366
LINC00511	72.1226	2.37966	0.349529	6.80817	9.8847e-12	9.55831e-11
LINC00535	4.14869	1.64495	0.691426	2.37907	0.0173566	0.0462733
LINC00540	6.37593	2.99326	0.704338	4.24975	2.14012e-05	0.000105411
LINC00543	2.66919	1.94056	0.714507	2.71594	0.00660884	0.0198213
LINC00545	8.25107	-1.47359	0.595887	-2.47293	0.0134009	0.0369112
LINC00599	587.646	-2.81162	0.129033	-21.79	2.88889e-105	3.68995e-103
LINC00623	25.7348	1.35004	0.406027	3.325	0.000884196	0.00324933
LINC00632	21.3226	1.74418	0.451904	3.85962	0.000113563	0.000494499
LINC00638	22.4452	1.51197	0.419896	3.60082	0.000317219	0.00126888
LINC00639	16.023	-2.2549	0.525687	-4.28943	1.79136e-05	8.92022e-05
LINC00648	33.3075	1.69021	0.38724	4.36477	1.27256e-05	6.47682e-05
LINC00665	1288.64	-1.04836	0.0954055	-10.9884	4.34446e-28	9.84163e-27
LINC00678	635.97	-8.07598	0.352913	-22.8838	6.7394e-116	1.02258e-113
LINC00698	275.244	-1.39429	0.151459	-9.20571	3.39423e-20	5.57679e-19
LINC00707	5.73184	-2.40996	0.683971	-3.52349	0.000425911	0.00165989
LINC00836	8.5409	2.26252	0.620323	3.64732	0.000264991	0.00107268
LINC00861	2.79286	2.03706	0.716208	2.84422	0.00445197	0.0139212
LINC00862	9.40098	-2.38517	0.607632	-3.92535	8.66036e-05	0.000385041
LINC00882	20.7053	-1.21844	0.430604	-2.82961	0.00466047	0.0145069
LINC00890	27.8094	-4.22138	0.525613	-8.03135	9.64048e-16	1.24048e-14
LINC00891	23.9189	-1.9344	0.434087	-4.45624	8.34111e-06	4.34141e-05
LINC00899	13.1739	-2.78757	0.565932	-4.92563	8.40884e-07	5.02928e-06
LINC00937	127.098	-2.64332	0.217906	-12.1306	7.27401e-34	1.99819e-32
LINC00941	138.571	-2.29138	0.242508	-9.44869	3.43084e-21	5.89844e-20
LINC00961	10.1242	-1.89884	0.568696	-3.33893	0.000841007	0.00310019
LINC00963	259.503	3.28849	0.194211	16.9326	2.58907e-64	1.56927e-62
LINC00992	2.84507	1.84783	0.711841	2.59584	0.00943593	0.0271617
LINC01018	15.2112	-2.68384	0.52625	-5.09994	3.39765e-07	2.13967e-06
LINC01021	86.2636	1.52738	0.259287	5.8907	3.84573e-09	2.95829e-08
LINC01050	2.13646	-1.79921	0.70981	-2.53477	0.0112521	0.0316127
LINC01057	26.6805	-1.36791	0.393505	-3.47621	0.000508547	0.00195498
LINC01090	2.35833	-1.89905	0.712674	-2.66469	0.00770596	0.0226874
LINC01097	24.2572	-1.70708	0.424661	-4.01987	5.82312e-05	0.000266764
LINC01116	11.5208	1.95994	0.572047	3.42618	0.000612125	0.00231963
LINC01124	431.765	8.57266	0.508088	16.8724	7.18195e-64	4.28416e-62
LINC01125	78.0443	1.10032	0.266692	4.12579	3.69467e-05	0.000175297
LINC01152	26.1423	1.4391	0.414746	3.46983	0.000520796	0.00199833
LINC01194	23.9682	-5.0999	0.618032	-8.25184	1.55981e-16	2.08787e-15
LINC01232	32.2691	-1.07546	0.373997	-2.87558	0.00403285	0.0127197
LINC01234	114.723	-1.33047	0.211158	-6.30084	2.96027e-10	2.53124e-09
LINC01305	3.2415	1.84373	0.715497	2.57685	0.00997066	0.0285013
LINC01330	2.46331	1.85558	0.713101	2.60213	0.00926473	0.0267233
LINC01336	31.1487	3.12449	0.439284	7.11268	1.13808e-12	1.18189e-11
LINC01359	3.89519	-1.77006	0.701792	-2.52219	0.0116625	0.0326603
LINC01405	42.0657	-2.22481	0.41667	-5.33948	9.32111e-08	6.23651e-07
LINC01410	71.1555	2.52721	0.289661	8.72473	2.66827e-18	3.95309e-17
LINC01451	18.6227	3.09615	0.538023	5.75467	8.68089e-09	6.47929e-08
LINC01456	20.1846	1.08853	0.426519	2.55213	0.0107068	0.0302725
LINC01484	37.4867	-5.04399	0.52926	-9.53028	1.56867e-21	2.74068e-20
LINC01487	270.773	-2.60181	0.181337	-14.3479	1.09737e-46	4.45412e-45
LINC01508	2.64179	1.97747	0.715492	2.76379	0.00571335	0.0174104
LINC01549	3.86091	1.80663	0.703098	2.56953	0.0101838	0.0290077
LINC01571	38.9621	4.78663	0.540779	8.85137	8.64527e-19	1.32241e-17
LINC01597	38.3454	-1.15648	0.389729	-2.9674	0.00300328	0.0097569
LINC01605	13.2533	2.42483	0.564886	4.2926	1.76595e-05	8.7998e-05
LINGO2	24.1048	1.36053	0.416435	3.2671	0.00108656	0.00392138
LIPG	731.126	1.0494	0.177738	5.9042	3.54366e-09	2.7343e-08
LIX1	108.665	3.18686	0.25846	12.3302	6.23148e-35	1.77209e-33
LL0XNC01-240C2.1	15.216	1.53558	0.493644	3.11071	0.0018664	0.00638071
LL22NC03-N95F10.1	17.2109	-3.04398	0.529715	-5.74645	9.11375e-09	6.78444e-08
LLGL2	281.058	-2.34271	0.167778	-13.9632	2.61482e-44	9.95215e-43
LLNLF-187D8.1	47.8946	-1.00046	0.325987	-3.06901	0.0021477	0.00722893
LMCD1	133.79	-1.5648	0.195348	-8.01032	1.14407e-15	1.46877e-14
LMF1	315.652	1.85065	0.163593	11.3125	1.13808e-29	2.73138e-28
LMO2	70.2755	2.19736	0.352412	6.23519	4.51218e-10	3.7782e-09
LMO3	657.593	-3.31486	0.121576	-27.2658	1.0811e-163	3.25887e-161
LMO7	196.935	-1.50043	0.171003	-8.77431	1.71954e-18	2.56773e-17
LMX1A	7.04016	2.44128	0.683724	3.57057	0.000356206	0.00141258
LMX1B	49.5751	5.32241	0.542919	9.80332	1.08946e-22	2.00902e-21
LNPEP	276.51	1.34616	0.155258	8.67045	4.30419e-18	6.32289e-17
LOXHD1	10.5701	-3.63837	0.64674	-5.6257	1.84758e-08	1.33026e-07
LOXL3	387.888	1.59034	0.141988	11.2005	4.055e-29	9.53959e-28
LOXL4	51.9763	1.99109	0.311689	6.38806	1.68006e-10	1.47506e-09
LPAL2	48.5336	1.24442	0.30411	4.092	4.27666e-05	0.000200678
LPAR1	132.483	1.8202	0.22397	8.12696	4.40178e-16	5.76901e-15
LPAR5	19.5154	1.57171	0.448806	3.50199	0.000461802	0.00178958
LPAR6	85.9788	1.60305	0.337938	4.74363	2.09925e-06	1.19306e-05
LPCAT2	228.081	1.0776	0.163379	6.59574	4.23141e-11	3.90623e-10
LPIN1	740.006	1.70809	0.140237	12.18	3.97284e-34	1.10206e-32
LPL	662.388	-3.76017	0.130808	-28.7457	1.02637e-181	4.21896e-179
LPO	7.63255	-1.81567	0.615409	-2.95035	0.0031741	0.0102456
LRAT	768.387	-3.55838	0.309713	-11.4893	1.49357e-30	3.67429e-29
LRFN5	241.955	5.16618	0.31317	16.4964	3.89352e-61	2.18967e-59
LRGUK	40.5145	-1.57699	0.335431	-4.7014	2.58386e-06	1.44845e-05
LRP2	31.6341	1.34664	0.459317	2.93183	0.00336972	0.0108168
LRRC10B	51.2659	3.23734	0.375568	8.61985	6.70419e-18	9.71591e-17
LRRC15	13.4619	-1.23074	0.510149	-2.41251	0.0158433	0.0427683
LRRC16A	719.024	-1.3347	0.107025	-12.4709	1.07582e-35	3.15461e-34
LRRC18	2.4011	1.79643	0.71132	2.52549	0.0115538	0.0323838
LRRC2	86.1466	-3.77677	0.305338	-12.3692	3.83767e-35	1.10104e-33
LRRC23	52.2589	1.14854	0.306038	3.75293	0.000174783	0.000734342
LRRC37A12P	2.36693	-1.86754	0.711636	-2.62429	0.00868292	0.0252188
LRRC3B	109.965	-1.16265	0.250635	-4.63881	3.50415e-06	1.92473e-05
LRRC4	1624.12	1.4139	0.123288	11.4683	1.90359e-30	4.65259e-29
LRRC4C	82.6854	2.41074	0.26586	9.06769	1.21572e-19	1.94791e-18
LRRC61	5.35092	-2.01728	0.682266	-2.95674	0.00310915	0.0100503
LRRC66	9.83289	1.36486	0.568606	2.40037	0.0163786	0.043998
LRRC73	7.95882	1.9608	0.619957	3.16281	0.00156255	0.00544485
LRRC8C	128.257	1.41847	0.225765	6.28297	3.32172e-10	2.82003e-09
LRRC9	66.5381	1.00552	0.266258	3.7765	0.000159046	0.000673355
LRRIQ1	131.321	1.30852	0.227082	5.76233	8.29598e-09	6.20018e-08
LRRK1	794.392	-3.33946	0.155784	-21.4365	6.10422e-102	7.34065e-100
LRRN1	4051.95	-1.5081	0.0846782	-17.8098	5.93321e-71	4.23148e-69
LRRN2	584.696	-2.00402	0.15366	-13.0419	7.06594e-39	2.31182e-37
LRRN4	13.8994	1.4447	0.529847	2.72663	0.00639846	0.0192567
LRRTM4	149.957	-1.94098	0.193923	-10.009	1.39123e-23	2.65649e-22
LTB	13.2243	-2.40815	0.556844	-4.32464	1.5278e-05	7.68421e-05
LTBR	83.5855	-1.10127	0.261455	-4.21211	2.53001e-05	0.000123034
LUM	38.184	4.74454	0.543298	8.73285	2.48341e-18	3.68405e-17
LURAP1L	20.5454	1.90463	0.457255	4.16535	3.10877e-05	0.00014938
LY6G6D	3.43772	2.29571	0.71651	3.20401	0.00135526	0.00478821
LYPD1	116.277	1.96966	0.490535	4.01532	5.93648e-05	0.000271519
LYPD6	513.401	1.72905	0.149369	11.5757	5.47431e-31	1.36755e-29
LYPD6B	276.541	6.0903	0.332515	18.3159	6.18219e-75	4.73786e-73
LYST	42.2935	2.19397	0.343429	6.38843	1.67599e-10	1.47206e-09
LZTS1	864.412	-1.53241	0.170797	-8.9721	2.90905e-19	4.56721e-18
MACC1	136.868	-3.15764	0.228054	-13.846	1.34512e-43	5.00171e-42
MACROD2	60.9206	1.02741	0.281342	3.65182	0.000260391	0.00105576
MAF	419.651	-2.17086	0.161478	-13.4437	3.35317e-41	1.15562e-39
MAFA	26.9939	3.22235	0.494514	6.51621	7.2108e-11	6.53394e-10
MAG	8.59271	-3.30908	0.663563	-4.98684	6.13734e-07	3.74199e-06
MAGEA4	187.204	-2.73451	0.189253	-14.449	2.54422e-47	1.04963e-45
MAGI2	203.608	-1.6837	0.191846	-8.77633	1.68903e-18	2.52717e-17
MAGI2-AS3	283.596	1.99848	0.176293	11.3362	8.68774e-30	2.09395e-28
MAK	18.3908	1.26767	0.475211	2.6676	0.00763955	0.0225124
MAL2	282.645	-3.03966	0.173898	-17.4795	2.05193e-68	1.37248e-66
MALT1	1157.84	1.28106	0.123834	10.3449	4.41175e-25	8.94537e-24
MAML3	969.158	1.71726	0.103808	16.5426	1.80893e-61	1.02754e-59
MAMSTR	56.6274	-1.26393	0.281382	-4.49186	7.06024e-06	3.71377e-05
MAN1A1	192.514	2.21969	0.233118	9.52175	1.70287e-21	2.97055e-20
MAN1A2P1	7.53266	-2.37066	0.655235	-3.61802	0.000296862	0.00119251
MAN1C1	72.6675	-1.76264	0.271992	-6.48049	9.1424e-11	8.21508e-10
MAP1B	3716.87	1.16068	0.0863247	13.4456	3.26907e-41	1.12835e-39
MAP2	1399.05	1.72424	0.15142	11.3871	4.84884e-30	1.17495e-28
MAP3K6	370.457	1.21156	0.140259	8.63801	5.72002e-18	8.33773e-17
MAP3K8	230.597	2.81245	0.226014	12.4437	1.51359e-35	4.4154e-34
MAP7	446.873	-5.15518	0.195054	-26.4295	6.27093e-154	1.62958e-151
MAPK11	272.739	2.79315	0.177984	15.6933	1.68182e-55	8.37501e-54
MAPK12	755.205	2.04783	0.110596	18.5163	1.52533e-76	1.21424e-74
MAPK13	86.2083	-1.89072	0.261371	-7.23387	4.69422e-13	5.05126e-12
MAPK15	379.073	1.00012	0.18746	5.33514	9.54684e-08	6.38376e-07
MAPK4	264.406	1.38803	0.171992	8.07034	7.01054e-16	9.09319e-15
MAPT-AS1	7.30794	2.67471	0.665672	4.01806	5.86797e-05	0.000268712
MARC1	910.519	-1.45457	0.098109	-14.8261	9.93428e-50	4.31083e-48
MARC2	123.329	-4.74877	0.310827	-15.2779	1.07413e-52	5.0697e-51
MARCH3	53.0762	-1.16525	0.2938	-3.96614	7.30452e-05	0.000328947
MARK1	546.108	-1.20659	0.127511	-9.46261	3.00344e-21	5.19524e-20
MARVELD2	235.728	-2.77147	0.173537	-15.9704	2.05323e-57	1.07952e-55
MARVELD3	44.2582	-4.08737	0.423669	-9.64756	5.0339e-22	9.00367e-21
MAT1A	212.267	1.086	0.220114	4.93381	8.06394e-07	4.8358e-06
MATK	16.0532	-1.84007	0.50042	-3.67704	0.000235953	0.000964809
MATN2	518.148	-1.7493	0.336721	-5.1951	2.0461e-07	1.32128e-06
MATN3	370.906	1.11941	0.135861	8.23942	1.73048e-16	2.31085e-15
MB21D2	418.875	-1.08418	0.122786	-8.82986	1.04811e-18	1.59246e-17
MBL1P	31.6711	1.58675	0.380916	4.1656	3.10535e-05	0.000149247
MBNL2	105.888	1.46166	0.23357	6.25791	3.90169e-10	3.28282e-09
MBOAT1	102.931	-1.6492	0.221239	-7.45437	9.03e-14	1.02228e-12
MBP	84.8308	-4.16384	0.325826	-12.7793	2.13877e-37	6.55193e-36
MC1R	73.8429	1.49722	0.26293	5.69438	1.23822e-08	9.09184e-08
MCAM	970.143	1.01357	0.0996576	10.1705	2.68547e-24	5.27023e-23
MCF2	22.6719	-1.77307	0.432074	-4.10363	4.06716e-05	0.000191443
MCHR1	103.913	-2.71806	0.260422	-10.4371	1.67809e-25	3.45521e-24
MCOLN3	148.985	4.30529	0.342626	12.5655	3.26619e-36	9.69056e-35
MCRIP2	342.406	-1.44621	0.159474	-9.06864	1.2051e-19	1.93304e-18
MCTP2	26.6592	-1.08663	0.389521	-2.78967	0.00527625	0.0162271
MDGA1	42.9881	1.58592	0.333089	4.76127	1.92381e-06	1.09804e-05
MDK	14693.4	1.45729	0.103418	14.0912	4.2993e-45	1.67584e-43
ME3	54.4066	-1.3518	0.295552	-4.57383	4.78897e-06	2.57661e-05
MEDAG	19.6454	-1.23643	0.433224	-2.85402	0.00431693	0.0135307
MEF2C	24.0513	1.98374	0.433289	4.57832	4.68725e-06	2.52684e-05
MEG9	18.4137	-2.83576	0.504951	-5.61592	1.95518e-08	1.40594e-07
MEGF10	328.541	-4.57616	0.19878	-23.0212	2.85785e-117	4.48682e-115
MEGF9	178.154	1.23999	0.206486	6.00521	1.91082e-09	1.50943e-08
MEIOC	81.8492	-2.33579	0.255634	-9.13724	6.40658e-20	1.03902e-18
MEIS1	28.9875	4.5192	0.585179	7.72276	1.13838e-14	1.3697e-13
MEIS2	185.747	3.45824	0.269476	12.8332	1.06854e-37	3.3229e-36
MEIS3	821.904	1.49901	0.125623	11.9326	8.00762e-33	2.12733e-31
MEOX1	32.0254	3.7596	0.486256	7.73172	1.06105e-14	1.27869e-13
MESP2	11.9444	-1.30232	0.535863	-2.43032	0.0150857	0.0409875
MEST	9345.53	1.96838	0.472088	4.16952	3.05246e-05	0.000146799
METRN	184.91	1.70939	0.189912	9.00099	2.23693e-19	3.52667e-18
METRNL	115.175	1.06576	0.209975	5.07564	3.86194e-07	2.41456e-06
METTL7A	356.017	-1.15491	0.148992	-7.75151	9.0808e-15	1.09668e-13
MFGE8	8141.63	-1.04686	0.0801825	-13.056	5.87688e-39	1.9368e-37
MFNG	72.6495	-2.23908	0.280228	-7.99021	1.34713e-15	1.71679e-14
MFSD13A	251.815	-1.02082	0.150161	-6.79818	1.0595e-11	1.02233e-10
MFSD2A	468.923	-1.24435	0.140628	-8.84849	8.87129e-19	1.35607e-17
MFSD3	567.134	-1.04553	0.134295	-7.7853	6.95475e-15	8.46771e-14
MFSD6	38.9863	-1.10413	0.336492	-3.2813	0.00103329	0.00374864
MGAT4C	328.635	-6.45288	0.302949	-21.3002	1.1303e-100	1.33093e-98
MGC15885	8.47229	3.48481	0.684107	5.09395	3.50672e-07	2.20344e-06
MGC32805	24.6195	-3.76538	0.509883	-7.3848	1.52688e-13	1.703e-12
MGST1	4175.99	-1.12068	0.109128	-10.2695	9.67213e-25	1.93854e-23
MGST2	408.636	1.24192	0.126989	9.77978	1.37507e-22	2.52745e-21
MIAT	2625.93	-3.01612	0.409566	-7.36419	1.78232e-13	1.97911e-12
MICAL1	2003.72	1.17371	0.0834889	14.0583	6.84904e-45	2.65597e-43
MICAL2	316.501	3.14578	0.195578	16.0845	3.27672e-58	1.75545e-56
MICB	146.997	-1.36385	0.201265	-6.7764	1.23211e-11	1.18082e-10
MID1	728.126	-1.36122	0.107086	-12.7114	5.11041e-37	1.55499e-35
MILR1	2.46564	-1.93923	0.713502	-2.71791	0.00656962	0.0197141
MIR100HG	52.5528	1.93022	0.302272	6.3857	1.70617e-10	1.49682e-09
MIR10A	8.89145	3.52132	0.68379	5.14972	2.60881e-07	1.66563e-06
MIR10B	18.8884	4.29586	0.660211	6.5068	7.67701e-11	6.9397e-10
MIR124-2HG	8.11184	2.60627	0.640193	4.07106	4.67994e-05	0.000218153
MIR196A1	8.17422	3.27973	0.695416	4.71621	2.40278e-06	1.35399e-05
MIR205HG	25.0659	-1.36105	0.419387	-3.24532	0.00117319	0.00420274
[truncated: 1,808 more rows]

## Sheet: log2FC>=1
GENE_NAME	baseMean	log2FoldChange	lfcSE	stat	pvalue	padj
A2M	18.9595	1.10755	0.464173	2.38607	0.0170297	0.0455253
A4GALT	99.7563	1.28328	0.299364	4.2867	1.81351e-05	9.01887e-05
ABALON	25.5909	1.06289	0.390765	2.72002	0.00652782	0.019611
ABCA5	53.9187	1.09025	0.288368	3.78075	0.000156358	0.000663343
ABCA9	16.365	3.40217	0.571676	5.95121	2.6617e-09	2.07502e-08
ABCB1	79.1691	2.8176	0.293822	9.58949	8.85255e-22	1.56236e-20
ABCB4	119.933	2.68844	0.246978	10.8853	1.35383e-27	3.00957e-26
ABCC6	24.8886	1.15691	0.404858	2.85756	0.00426917	0.0133996
ABCD2	9.39759	3.03108	0.645844	4.69321	2.68952e-06	1.50432e-05
ABCG1	323.793	1.37396	0.421469	3.25993	0.0011144	0.00401314
ABCG2	77.9536	3.59016	0.334241	10.7412	6.51815e-27	1.41694e-25
ABHD14A	47.6358	1.50103	0.323467	4.64045	3.47657e-06	1.91004e-05
ABHD3	266.702	1.04435	0.183846	5.68059	1.34229e-08	9.8272e-08
ABLIM1	4257.27	1.06381	0.108385	9.81512	9.69236e-23	1.78878e-21
AC002454.1	9.70326	1.56611	0.575335	2.72208	0.00648725	0.0195084
AC002480.3	15.1168	1.37096	0.490796	2.79334	0.00521674	0.0160594
AC004540.4	15.2479	1.24146	0.479199	2.59069	0.00957838	0.0275196
AC005152.3	13.2274	2.47888	0.588805	4.21001	2.55355e-05	0.000124055
AC005329.7	10.5007	1.65294	0.596202	2.77245	0.00556356	0.0170158
AC007277.3	96.6757	6.68569	0.558675	11.967	5.28826e-33	1.4132e-31
AC007405.4	25.0672	3.5493	0.506968	7.00103	2.54089e-12	2.57367e-11
AC007405.6	123.014	2.46279	0.241722	10.1885	2.23187e-24	4.39531e-23
AC007405.8	32.7166	5.3016	0.606737	8.7379	2.37492e-18	3.52542e-17
AC007461.2	3.12149	2.14115	0.716813	2.98704	0.00281693	0.00922572
AC007682.1	17.9273	4.22059	0.615142	6.86116	6.83038e-12	6.6936e-11
AC007743.1	93.5598	1.12001	0.25233	4.43866	9.05211e-06	4.68522e-05
AC009014.3	12.8353	1.66752	0.706835	2.35914	0.0183176	0.0484355
AC009166.5	15.2828	2.28037	0.529732	4.30477	1.6716e-05	8.35724e-05
AC009166.7	15.2431	3.2971	0.582439	5.66086	1.50619e-08	1.09774e-07
AC009336.19	46.5395	5.6392	0.601203	9.37986	6.6058e-21	1.12715e-19
AC009948.5	256.046	1.04954	0.172724	6.07643	1.2289e-09	9.90478e-09
AC010980.2	14.3964	3.92771	0.6302	6.23249	4.59082e-10	3.83978e-09
AC012531.25	47.0531	5.67203	0.598888	9.47094	2.77333e-21	4.81563e-20
AC087073.1	4.99309	2.60853	0.713274	3.65712	0.000255063	0.0010362
AC092198.1	46.5742	1.63209	0.342292	4.76812	1.85957e-06	1.06514e-05
AC093620.5	4.15277	2.19648	0.706827	3.10753	0.00188661	0.00644297
AC141928.1	629.686	6.22521	0.234803	26.5125	6.95678e-155	1.82882e-152
AC159540.1	136.878	1.01347	0.201231	5.03633	4.74553e-07	2.93454e-06
ACAN	38.4998	2.23647	0.38835	5.7589	8.46631e-09	6.3233e-08
ACKR3	136.637	1.63869	0.206049	7.9529	1.82195e-15	2.30115e-14
ACOT12	73.9565	4.79476	0.409265	11.7155	1.06133e-31	2.73286e-30
ACPP	20.0774	1.47573	0.496789	2.97054	0.00297275	0.00967158
ACSL6	29.9503	1.07747	0.377202	2.85648	0.00428365	0.0134432
ACTA1	131.102	4.35911	0.3109	14.0209	1.16104e-44	4.44896e-43
ACTA2	559.984	4.96283	0.180369	27.5149	1.16361e-166	3.60368e-164
ACTC1	899.279	1.55049	0.15132	10.2464	1.22789e-24	2.4523e-23
ACTG2	397.099	1.01532	0.189702	5.35219	8.68974e-08	5.84e-07
ADAM12	79.7084	1.33224	0.281544	4.7319	2.22429e-06	1.26064e-05
ADAMTS15	723.518	3.1741	0.154314	20.5691	5.19406e-94	5.48726e-92
ADAMTS17	320.828	2.88078	0.155501	18.5258	1.27906e-76	1.02181e-74
ADAMTS9	180.011	1.8063	0.17894	10.0945	5.84513e-24	1.13528e-22
ADCK5	73.5368	1.28086	0.267781	4.78322	1.72507e-06	9.944e-06
ADCY6	2266.28	1.57769	0.255141	6.18359	6.26589e-10	5.18329e-09
ADGRE5	340.961	1.74877	0.162932	10.7332	7.11252e-27	1.54318e-25
ADGRG1	82.5705	1.38623	0.307792	4.50377	6.67591e-06	3.52638e-05
ADGRG6	104.942	1.71233	0.234614	7.29849	2.9101e-13	3.16763e-12
ADGRL3	838.201	1.54121	0.0995195	15.4865	4.27788e-54	2.07542e-52
ADGRL4	121.144	1.29512	0.207677	6.23623	4.48253e-10	3.75615e-09
ADGRV1	1048.11	1.27525	0.306307	4.16331	3.13664e-05	0.000150527
ADRA2C	958.474	4.76742	0.15038	31.7024	1.43796e-220	8.33574e-218
ADRB1	2.91413	2.06847	0.716322	2.88763	0.00388154	0.0122836
AFAP1L2	611.346	3.95726	0.155226	25.4936	2.32213e-143	5.3029e-141
AFF2	188.876	1.27276	0.209492	6.07548	1.23614e-09	9.95958e-09
AFF3	358.532	1.32702	0.142669	9.30139	1.38617e-20	2.33174e-19
AGFG2	122.337	1.02056	0.197515	5.16701	2.37862e-07	1.52556e-06
AGR2	39.2997	3.82871	0.700297	5.46727	4.57017e-08	3.16649e-07
AGRN	7729.54	1.3151	0.127883	10.2836	8.35292e-25	1.67711e-23
AHDC1	1901.36	1.32218	0.120757	10.9491	6.71254e-28	1.50255e-26
AHNAK	1526.03	5.86761	0.281546	20.8407	1.8521e-96	2.04255e-94
AHNAK2	33.3987	1.19868	0.369711	3.24222	0.00118601	0.00424267
AJ006998.2	8.17124	2.42998	0.667509	3.64036	0.000272253	0.00110115
AJAP1	894.827	1.96824	0.171277	11.4916	1.45472e-30	3.58261e-29
AK3	931.847	1.10924	0.101905	10.885	1.35883e-27	3.01773e-26
AK8	20.0344	1.22615	0.440339	2.78456	0.00536008	0.0164571
AKAIN1	5.86094	2.41688	0.705887	3.42389	0.000617325	0.00233738
AKAP6	42.464	1.39614	0.331292	4.21421	2.50657e-05	0.000122078
ALDH1A2	83.0295	4.50632	0.380393	11.8465	2.24392e-32	5.88522e-31
ALK	6.7688	1.51606	0.641645	2.36277	0.0181389	0.0480569
ALOXE3	18.2347	3.7327	0.586624	6.36302	1.97822e-10	1.72678e-09
ALPK2	75.4618	4.30098	0.369039	11.6545	2.17548e-31	5.51381e-30
ALX3	4.17425	2.19624	0.70663	3.10805	0.00188328	0.00643356
ALX4	15.9431	4.26987	0.652884	6.54001	6.15144e-11	5.60548e-10
AMDHD1	12.9343	1.57941	0.553597	2.853	0.00433081	0.0135667
AMER2	10.9583	2.43452	0.596905	4.07857	4.53127e-05	0.000211659
AMHR2	37.2184	1.80582	0.359026	5.02977	4.91064e-07	3.02671e-06
AMOT	1072.53	2.06991	0.111315	18.595	3.52784e-77	2.83834e-75
AMOTL1	6120.36	1.59311	0.0820119	19.4253	4.71673e-84	4.29983e-82
AMOTL2	2658.57	1.6833	0.0995874	16.9027	4.29487e-64	2.59621e-62
ANGPT2	27.6048	3.96772	0.523669	7.57677	3.54255e-14	4.1135e-13
ANGPTL1	43.9835	1.52821	0.400278	3.81788	0.000134604	0.000577773
ANKRD1	116.231	3.90009	0.300667	12.9715	1.77624e-38	5.70415e-37
ANKRD53	19.3416	2.57329	0.493248	5.21704	1.81807e-07	1.17961e-06
ANKRD65	17.0838	2.14273	0.508849	4.21094	2.54313e-05	0.000123619
ANKRD66	3.28589	1.99615	0.714869	2.79233	0.00523302	0.0161051
ANO3	10.6714	1.46725	0.5744	2.5544	0.0106371	0.0300907
ANTXR2	981.385	2.09291	0.128435	16.2955	1.06249e-59	5.83029e-58
ANXA1	515.161	3.00397	0.137842	21.7929	2.7114e-105	3.48291e-103
ANXA2	5390.95	1.0261	0.0957184	10.72	8.19754e-27	1.7718e-25
AOC3	62.5625	1.48342	0.291143	5.09515	3.48471e-07	2.19144e-06
AP000221.1	35.4292	1.2314	0.356902	3.45026	0.000560049	0.00213662
AP000432.1	27.9165	1.41366	0.394494	3.58348	0.000339046	0.00134926
AP000892.6	127.475	3.44153	0.263286	13.0714	4.79435e-39	1.58235e-37
APC2	29.8985	2.57791	0.43354	5.9462	2.74437e-09	2.13433e-08
APCDD1	4387.59	2.23604	0.356158	6.27823	3.42448e-10	2.90291e-09
APLNR	8642	3.52976	0.248914	14.1807	1.20721e-45	4.7882e-44
APOLD1	108.212	1.42504	0.221875	6.42269	1.33883e-10	1.1842e-09
ARHGAP10	140.356	2.46889	0.304659	8.1038	5.3268e-16	6.95313e-15
ARHGAP24	271.382	4.60945	0.268051	17.1962	2.83704e-66	1.78166e-64
ARHGAP29	332.031	3.64619	0.174973	20.8386	1.93312e-96	2.12155e-94
ARHGAP36	3.88657	2.09777	0.709723	2.95577	0.00311894	0.0100762
ARHGAP6	54.1017	2.27572	0.315416	7.21497	5.39465e-13	5.79117e-12
ARHGDIB	23.5183	1.14527	0.439854	2.60375	0.00922112	0.0266145
ARHGEF17	1208.23	1.73195	0.103155	16.7898	2.90048e-63	1.70766e-61
ARHGEF26-AS1	3.75072	1.73144	0.706761	2.44982	0.0142928	0.039139
ARHGEF28	48.1892	3.75753	0.423689	8.86861	7.40665e-19	1.13757e-17
ARHGEF37	45.4752	1.31324	0.313455	4.18956	2.79497e-05	0.000135192
ARID3A	4465.32	1.85203	0.083807	22.0988	3.24663e-108	4.31764e-106
ARID5B	139.669	1.58712	0.198411	7.99915	1.25279e-15	1.60018e-14
ARL4C	933.439	2.29386	0.106994	21.4391	5.77191e-102	6.97814e-100
ARL4D	368.113	1.52825	0.178205	8.5758	9.84016e-18	1.40623e-16
ARL9	20.5145	2.04231	0.491599	4.15443	3.26094e-05	0.000156161
ARMC3	38.0952	2.21048	0.47262	4.67709	2.90976e-06	1.62029e-05
ARNT2	1168.2	1.71256	0.101377	16.893	5.06214e-64	3.05186e-62
ARRDC3	1048.57	1.81124	0.128248	14.1229	2.74557e-45	1.07764e-43
ARRDC4	178.656	1.70311	0.180084	9.45731	3.15982e-21	5.45321e-20
ARSD	95.6503	1.41241	0.234365	6.02656	1.67487e-09	1.33329e-08
ARSE	28.1326	1.28691	0.383952	3.35175	0.000803039	0.00297199
ARSI	448.909	3.31432	0.162115	20.4443	6.7488e-93	6.96698e-91
ASIC2	147.289	3.3693	0.271539	12.4081	2.36053e-35	6.80701e-34
ASXL1	2578.68	1.02372	0.0766461	13.3565	1.0856e-40	3.71866e-39
ASXL3	90.5557	4.36506	0.352549	12.3814	3.29464e-35	9.46446e-34
ATF3	321.378	1.53155	0.157092	9.7494	1.85567e-22	3.38603e-21
ATOH8	323.083	3.18087	0.215692	14.7473	3.20396e-49	1.36413e-47
ATP6V1B1	10.0196	3.08299	0.648313	4.75541	1.98045e-06	1.12781e-05
ATP8B4	22.2425	1.711	0.461195	3.70994	0.000207309	0.000857612
ATRNL1	314.552	1.82453	0.174384	10.4628	1.28073e-25	2.65883e-24
ATXN1	32.1389	1.44957	0.387563	3.74022	0.000183861	0.00076806
AXIN2	2303.12	3.25416	0.0958238	33.9598	8.73232e-253	6.3684e-250
AZIN2	66.6499	2.62331	0.298968	8.77457	1.71564e-18	2.56462e-17
B3GNT5	451.156	1.29756	0.141221	9.18819	3.99524e-20	6.54999e-19
B3GNT8	44.9091	1.01994	0.313818	3.25009	0.00115369	0.00413945
B4GALNT1	162.506	1.41388	0.224417	6.30026	2.97154e-10	2.53991e-09
BAALC	171.363	4.13411	0.560425	7.37673	1.62221e-13	1.80398e-12
BAALC-AS1	17.3538	1.61855	0.495774	3.26469	0.00109582	0.00395188
BAAT	24.4546	2.65772	0.452387	5.87488	4.23138e-09	3.24612e-08
BACH2	121.767	1.88989	0.219093	8.626	6.35333e-18	9.21925e-17
BAHCC1	1224.77	6.39579	0.190541	33.5665	5.16798e-247	3.54054e-244
BARX2	11.5094	3.84392	0.671936	5.72066	1.06112e-08	7.84747e-08
BASP1P1	4.2877	2.59216	0.712436	3.63845	0.000274289	0.00110873
BBS5	122.29	1.39111	0.200982	6.92158	4.46644e-12	4.4621e-11
BCAN	26.166	1.09832	0.398665	2.75499	0.00586935	0.0178424
BCL2	227.168	1.54343	0.160844	9.59582	8.32486e-22	1.47303e-20
BCL2L11	823.983	1.17245	0.10451	11.2186	3.30624e-29	7.8106e-28
BCORL1	435.46	1.79937	0.1656	10.8658	1.67803e-27	3.72295e-26
BDKRB2	30.8927	1.86725	0.390726	4.77894	1.76225e-06	1.01428e-05
BDNF-AS	18.1674	1.56043	0.465379	3.35303	0.000799316	0.00296051
BEND6	74.9598	1.26999	0.26001	4.88437	1.03757e-06	6.14875e-06
BGN	6721.99	3.46954	0.282482	12.2823	1.12711e-34	3.18522e-33
BICC1	71.4838	3.33525	0.319273	10.4464	1.52253e-25	3.14063e-24
BLACAT1	362.102	1.18271	0.151406	7.81152	5.65029e-15	6.94266e-14
BMI1	221.469	1.83511	0.167501	10.9558	6.2317e-28	1.40046e-26
BMP1	801.398	2.23315	0.108841	20.5176	1.50071e-93	1.55634e-91
BMP2	339.892	4.52887	0.22488	20.139	3.35944e-90	3.30218e-88
BMP4	348.458	5.24479	0.256655	20.4351	8.14538e-93	8.37049e-91
BMP5	89.141	5.58808	0.470514	11.8765	1.56708e-32	4.13402e-31
BMP6	195.911	3.79016	0.492811	7.6909	1.46098e-14	1.74025e-13
BMP7	571.07	3.54117	0.347332	10.1953	2.08011e-24	4.11076e-23
BMPR1B	87.1418	1.68981	0.238687	7.07961	1.44562e-12	1.49235e-11
BNC1	21.8624	1.60585	0.477192	3.3652	0.000764879	0.00284274
BNIP3	662.741	1.19123	0.153055	7.78302	7.08161e-15	8.61685e-14
BORCS7	240.259	1.15513	0.153881	7.50668	6.06466e-14	6.9419e-13
BRINP3	55.6526	2.65652	0.369349	7.19242	6.3652e-13	6.79756e-12
BTG2	800.648	3.02995	0.117928	25.6932	1.39421e-145	3.28338e-143
BVES	141.872	1.70658	0.244917	6.968	3.21488e-12	3.2375e-11
C10orf10	31.4021	3.62652	0.475286	7.63018	2.3442e-14	2.75743e-13
C10orf11	25.1513	3.12397	0.510782	6.11606	9.59177e-10	7.80039e-09
C10orf71	9.6806	2.80242	0.634983	4.41338	1.01769e-05	5.2386e-05
C11orf45	6.57087	2.24264	0.668315	3.35567	0.000791727	0.00293528
C11orf63	27.6592	2.2694	0.418025	5.42886	5.67165e-08	3.88678e-07
C11orf87	426.799	5.25978	0.487563	10.7879	3.92619e-27	8.59277e-26
C17orf96	1305.56	2.89707	0.16326	17.7452	1.87832e-70	1.31879e-68
C18orf65	14.7944	2.11427	0.529011	3.99664	6.42475e-05	0.000292726
C1QL3	13.097	1.40795	0.54171	2.59908	0.00934742	0.0269446
C1QL4	8.96045	2.00108	0.599434	3.33828	0.000842991	0.00310649
C1orf105	2.25503	1.79064	0.711346	2.51726	0.0118272	0.0330681
C1orf158	10.5158	3.38755	0.695617	4.86986	1.1168e-06	6.59405e-06
C1orf168	3.47529	1.66353	0.708838	2.34685	0.0189331	0.0498648
C1orf194	13.2477	3.42164	0.671481	5.09567	3.47508e-07	2.18599e-06
C1orf228	7.81355	1.93678	0.620518	3.12124	0.00180094	0.00618498
C1orf53	26.2073	2.40444	0.451252	5.32837	9.90956e-08	6.61262e-07
C1orf64	24.8221	4.26073	0.59638	7.14433	9.0439e-13	9.51883e-12
C20orf166-AS1	9.88146	1.61115	0.564683	2.85319	0.00432827	0.0135606
C22orf23	12.6179	1.3057	0.52301	2.49652	0.012542	0.0348213
C22orf24	11.3134	1.46546	0.546389	2.68208	0.00731662	0.0216709
C2CD2L	166.745	1.27871	0.179272	7.13281	9.83435e-13	1.0279e-11
C2orf40	49.8378	1.26538	0.318792	3.96931	7.20814e-05	0.000324948
C2orf72	44.4838	1.11258	0.312386	3.56156	0.000368654	0.0014581
C2orf88	29.0697	1.02535	0.383496	2.67369	0.00750212	0.0221652
C3orf52	1920.21	3.13133	0.140426	22.2988	3.7951e-110	5.16865e-108
C3orf80	10.7563	1.59083	0.561315	2.83412	0.00459524	0.0143256
C4orf19	40.949	1.09523	0.33471	3.27218	0.00106723	0.00385799
C4orf47	35.0057	1.01059	0.352106	2.87013	0.00410302	0.0129302
C5orf42	754.687	1.35961	0.139179	9.76879	1.5327e-22	2.81032e-21
C5orf49	36.2608	2.31629	0.448785	5.16124	2.45324e-07	1.56941e-06
C6orf1	75.3166	1.18175	0.250488	4.71779	2.38418e-06	1.34384e-05
C6orf118	74.657	2.32944	0.323259	7.20611	5.75711e-13	6.16273e-12
C6orf25	22.2886	2.41876	0.462444	5.23038	1.69159e-07	1.1018e-06
C6orf52	25.3962	1.32461	0.404938	3.27114	0.00107116	0.00387096
C7	271.642	7.98094	0.522902	15.2628	1.3538e-52	6.33678e-51
C7orf57	13.8817	3.18632	0.627384	5.07874	3.79942e-07	2.37745e-06
C8orf31	60.7375	1.38051	0.281519	4.9038	9.39993e-07	5.58365e-06
C8orf48	57.2979	1.43932	0.297455	4.83877	1.30645e-06	7.64398e-06
C9orf24	27.7812	2.83684	0.532023	5.33218	9.70423e-08	6.48133e-07
C9orf47	37.6624	1.36481	0.403876	3.37928	0.000726761	0.00271222
CA10	13.1175	3.28744	0.605011	5.43369	5.52014e-08	3.78983e-07
CA4	174.085	5.00854	0.315856	15.857	1.25714e-56	6.4594e-55
CA8	49.671	1.19382	0.294371	4.05548	5.00306e-05	0.000232067
CACHD1	6540.93	1.15898	0.0902077	12.8479	8.84097e-38	2.76455e-36
CACNA1E	126.039	1.51216	0.520378	2.90589	0.00366205	0.0116641
CACNA1I	92.7982	2.50774	0.340757	7.35932	1.84843e-13	2.0495e-12
CACNB3	540.689	1.44841	0.126539	11.4464	2.45211e-30	5.96741e-29
CACNG4	267.344	3.2517	0.419416	7.75293	8.97993e-15	1.08566e-13
CADM1	1496.65	1.73058	0.0939543	18.4193	9.19195e-76	7.19071e-74
CAMK2A	38.1122	2.91537	0.406712	7.16813	7.60288e-13	8.06597e-12
CAPS2	29.5047	1.45588	0.382666	3.80457	0.000142051	0.000606744
CARMN	38.0475	2.8972	0.407932	7.10217	1.22817e-12	1.27369e-11
CASP7	395.378	1.75402	0.151829	11.5527	7.15738e-31	1.78013e-29
CASQ1	68.48	1.28496	0.286436	4.48603	7.25626e-06	3.81068e-05
CBLN2	5.56757	2.70392	0.71193	3.79801	0.000145863	0.000621852
CBX4	148.878	1.93348	0.214502	9.0138	1.9904e-19	3.15119e-18
CBX8	154.015	3.09203	0.243641	12.6909	6.63895e-37	2.00124e-35
CCDC140	4.02945	1.82888	0.704465	2.59612	0.00942832	0.0271432
CCDC148	36.9028	1.24632	0.356121	3.4997	0.000465779	0.00180345
CCDC167	273.941	1.54924	0.16542	9.36549	7.5695e-21	1.28767e-19
CCDC169	36.9447	1.27266	0.368891	3.44997	0.000560647	0.00213854
CCDC170	9.71947	2.46024	0.648267	3.7951	0.000147584	0.000628357
CCDC184	81.4138	1.41734	0.25828	5.48761	4.07399e-08	2.84011e-07
CCDC3	35.8667	1.67736	0.37685	4.451	8.54731e-06	4.44326e-05
CCDC33	148.344	1.76098	0.201917	8.72133	2.74954e-18	4.07084e-17
CCDC57	462.59	1.60845	0.138307	11.6296	2.9139e-31	7.35239e-30
CCDC60	14.867	1.24127	0.49417	2.51182	0.0120109	0.0335403
CCDC80	872.415	1.9787	0.117435	16.8493	1.06197e-63	6.29564e-62
CCDC85A	66.1974	5.4997	0.51308	10.719	8.28962e-27	1.78828e-25
CCDC92	172.859	1.65768	0.187155	8.85727	8.20001e-19	1.25685e-17
CCL2	99.0477	1.029	0.224181	4.59006	4.43111e-06	2.39776e-05
CCL26	11.5818	2.08436	0.570083	3.65625	0.000255931	0.00103917
CCNA1	3.50206	1.92066	0.714228	2.68914	0.00716358	0.0212734
[truncated: 1,664 more rows]

## Sheet: log2FC=<-1
GENE_NAME	baseMean	log2FoldChange	lfcSE	stat	pvalue	padj
[truncated: 1,896 more rows]

[truncated: 6 more sheets: enrichment_up(FDR>=0.05), clustering_up, enrichment_down(FDR<=0.05), clustering_down, Panther_DE, TF signatures]
