# Supplementary material for: Human axial progenitors generate trunk neural crest cells in vitro
Source: eLife. 2018 Aug 10;7:e35786. doi: 10.7554/eLife.35786 (PMC6101942; doi:10.7554/eLife.35786)
Supplement: Supplementary file 2. [file elife-35786-supp2.xlsx]

## Sheet: ANC VS ES > 2FOLD
#%result_name=Analysis_1
#%array_type=Clariom_D_Human
#%annotation=Clariom_D_Human.na36.hg38.transcript.csv
#%comparison=CD6 vs PLURI
ID	Description	Gene Symbol	Fold Change	CD6 Avg (log2)	PLURI Avg (log2)	CD6 Standard Deviation	PLURI Standard Deviation	CD6 Expressed	PLURI Expressed	P-val	FDR P-val	Group	Expressed in both conditios
TC0500007044.hg.1	cadherin 6, type 2, K-cadherin (fetal kidney)	CDH6	1191.3	16.79	6.57	1.82	1.3	T	T	1.3e-08	2.72e-06	Multiple_Complex
TC0600008231.hg.1	transcription factor AP-2 beta (activating enhancer binding protein 2 beta)	TFAP2B	1066.05	14.61	4.55	0.49	0.52	T	T	2.81e-14	4.71e-11	Multiple_Complex
TC1000012169.hg.1	ADAM metallopeptidase domain 12	ADAM12	745.09	14.59	5.05	2.64	0.4	T	F	3.52e-09	9.01e-07	Multiple_Complex
TC0800010382.hg.1	snail family zinc finger 2	SNAI2	683.11	16.78	7.36	0.29	0.94	T	T	4.62e-10	1.58e-07	Coding
TC1500008442.hg.1	nuclear receptor subfamily 2, group F, member 2	NR2F2	558.29	13.46	4.33	1.93	0.31	T	F	5.15e-09	1.26e-06	Multiple_Complex
TC0100014531.hg.1	wntless Wnt ligand secretion mediator	WLS	403	14.33	5.68	0.34	0.6	T	T	1.87e-15	1.06e-11	Multiple_Complex
TC0900009905.hg.1	ciliary neurotrophic factor receptor	CNTFR	353.2	14.01	5.55	0.59	0.39	T	T	1.53e-14	3.3e-11	Multiple_Complex
TC0400011548.hg.1	lymphoid enhancer-binding factor 1	LEF1	325.62	14.31	5.97	1.08	0.44	T	T	3.33e-12	2.38e-09	Multiple_Complex
TC0500011418.hg.1	myocyte enhancer factor 2C	MEF2C	317.14	15.86	7.56	0.2	0.69	T	T	6.75e-11	3.15e-08	Multiple_Complex
TC0400008943.hg.1	endothelin receptor type A	EDNRA	257.67	17.32	9.31	0.47	0.94	T	T	4.74e-10	1.61e-07	Multiple_Complex
TC2000008445.hg.1	fibronectin leucine rich transmembrane protein 3	FLRT3	230.34	13.35	5.5	0.09	0.95	T	T	1.16e-10	4.85e-08	Multiple_Complex
TC0500011146.hg.1	ectodermal-neural cortex 1 (with BTB domain)	ENC1	216.61	15.42	7.66	0.15	0.86	T	T	9.28e-10	2.84e-07	Multiple_Complex
TC0500008086.hg.1	nuclear receptor subfamily 2, group F, member 1	NR2F1	207.98	13.84	6.14	1.65	0.47	T	T	6.99e-08	1.11e-05	Multiple_Complex
TC0200015350.hg.1	raftlin family member 2	RFTN2	199.29	14.38	6.74	0.24	0.38	T	T	3.01e-09	7.88e-07	Multiple_Complex
TC1700008209.hg.1	nerve growth factor receptor	NGFR	184.08	14.59	7.07	0.16	0.41	T	T	6.59e-14	9.04e-11	Multiple_Complex
TC0600011524.hg.1	collagen, type XI, alpha 2	COL11A2	171.42	11.79	4.37	2.92	0.18	T	T	1.14e-06	0.0001	Multiple_Complex
TC0300012073.hg.1	limbic system-associated membrane protein	LSAMP	160.32	14.48	7.15	0.26	0.13	T	T	1.17e-11	6.93e-09	Multiple_Complex
TC1200010130.hg.1	SRY box 5	SOX5	149.79	12.41	5.19	0.61	0.8	T	T	9.41e-11	4.13e-08	Multiple_Complex
TC1500009505.hg.1	protogenin	PRTG	127.51	15.85	8.86	0.82	1.07	T	T	3.05e-12	2.2e-09	Multiple_Complex
TC1500009036.hg.1	Meis homeobox 2	MEIS2	121.8	12.5	5.57	0.72	0.4	T	T	9.17e-07	9.87e-05	Multiple_Complex
TC1100006911.hg.1	spondin 1, extracellular matrix protein	SPON1	111.02	11.65	4.86	0.45	1.1	T	T	4.81e-08	8.2e-06	Multiple_Complex
TC0600010777.hg.1	transcription factor AP-2 alpha (activating enhancer binding protein 2 alpha)	TFAP2A	110.07	12.94	6.16	0.41	0.03	T	T	5.57e-14	7.79e-11	Multiple_Complex
TC0200014512.hg.1	zinc finger E-box binding homeobox 2	ZEB2	108.72	10.89	4.12	0.77	0.61	T	F	1.31e-08	2.73e-06	Multiple_Complex
TC1000011923.hg.1	GDNF family receptor alpha 1	GFRA1	102.41	11.82	5.14	0.36	0.35	T	T	3.83e-10	1.34e-07	Multiple_Complex
TC0300013988.hg.1	poly(rC) binding protein 4	PCBP4	94.32	13.95	7.39	0.16	0.12	T	T	8.23e-15	2.19e-11	Multiple_Complex
TC0100011262.hg.1	proline/arginine-rich end leucine-rich repeat protein	PRELP	73.32	11.1	4.91	0.56	0.43	T	T	5.53e-12	3.61e-09	Coding
TC0X00008785.hg.1	biglycan	BGN	72.33	13.81	7.63	1.71	0.25	T	T	1.37e-08	2.83e-06	Multiple_Complex
TC1500010006.hg.1	stimulated by retinoic acid 6	STRA6	71.6	11.21	5.05	0.49	0.27	T	T	1.92e-10	7.57e-08	Multiple_Complex
TC0200007348.hg.1	protein kinase domain containing, cytoplasmic	PKDCC	71.42	13.66	7.5	0.4	0.33	T	T	2.2e-09	5.94e-07	Multiple_Complex
TC0200014414.hg.1	chemokine (C-X-C motif) receptor 4	CXCR4	69.17	12.46	6.35	1.23	0.42	T	T	5.96e-08	9.79e-06	Multiple_Complex
TC0200010545.hg.1	neuropilin 2	NRP2	67.33	15.4	9.33	0.09	0.97	T	T	8.21e-13	7.19e-10	Multiple_Complex
TC0200015831.hg.1	paired box 3	PAX3	65.57	11.44	5.41	0.14	0.25	T	T	2.87e-12	2.1e-09	Multiple_Complex
TC0200006891.hg.1	ras homolog family member B	RHOB	63.55	12.81	6.82	0.83	1.12	T	T	1.12e-10	4.73e-08	Coding
TC1800006827.hg.1	growth regulation by estrogen in breast cancer-like	GREB1L	61.84	10.24	4.29	0.84	0.45	T	T	5.91e-11	2.8e-08	Multiple_Complex
TC1100010207.hg.1	SRY box 6; microRNA 6073	SOX6; MIR6073	58.34	10.59	4.73	0.86	0.48	T	T	7.11e-11	3.31e-08	Multiple_Complex
TC0100010244.hg.1	interferon, gamma-inducible protein 16	IFI16	56.76	11.81	5.99	0.26	1.38	T	T	7.95e-07	8.83e-05	Multiple_Complex
TC0800011620.hg.1	ectonucleotide pyrophosphatase/phosphodiesterase 2	ENPP2	55.85	13.19	7.39	0.63	0.31	T	T	1.17e-08	2.49e-06	Multiple_Complex
TC0800010774.hg.1	EYA transcriptional coactivator and phosphatase 1	EYA1	55.45	11.82	6.03	1.23	0.26	T	T	8.45e-09	1.9e-06	Multiple_Complex
TC0100016018.hg.1	cellular retinoic acid binding protein 2	CRABP2	55.38	16.85	11.06	0.48	0.72	T	T	9.35e-12	5.69e-09	Coding
TC1200008269.hg.1	neuron navigator 3	NAV3	52.66	10.65	4.93	0.71	0.73	T	T	8.2e-10	2.59e-07	Multiple_Complex
TC1200008346.hg.1	ALX homeobox 1	ALX1	50.53	10.65	4.99	0.19	0.59	T	T	8.62e-11	3.91e-08	Coding
TC1000007199.hg.1	zinc finger E-box binding homeobox 1	ZEB1	50.38	11.65	6	0.22	0.89	T	T	3.69e-07	4.62e-05	Multiple_Complex
TC0100010281.hg.1	ATPase, Na+/K+ transporting, alpha 2 polypeptide	ATP1A2	47.82	15.05	9.47	0.2	0.6	T	T	8.71e-09	1.94e-06	Multiple_Complex
TC1700009850.hg.1	peripheral myelin protein 22	PMP22	47.73	13.21	7.63	0.63	0.84	T	T	1.27e-09	3.76e-07	Multiple_Complex
TC1600008005.hg.1	adhesion G protein-coupled receptor G1	ADGRG1	44.69	8.86	3.37	1.98	0.14	T	T	1.07e-05	0.0008	Multiple_Complex
TC1200010592.hg.1	adenylate cyclase 6; microRNA 4701	ADCY6; MIR4701	43.5	13.14	7.7	0.39	0.22	T	T	3.41e-12	2.39e-09	Multiple_Complex
TC0800009816.hg.1	GDNF family receptor alpha 2	GFRA2	42.98	10.91	5.48	1.88	0.25	T	T	3.1e-06	0.0003	Multiple_Complex
TC2000008175.hg.1	prodynorphin	PDYN	41.51	9.93	4.55	0.17	0.49	T	F	2.32e-11	1.29e-08	Coding
TC0200015893.hg.1	dedicator of cytokinesis 10	DOCK10	41.24	11.09	5.73	2.4	0.43	T	T	0.0001	0.0056	Multiple_Complex
TC1400009175.hg.1	nidogen 2 (osteonidogen)	NID2	37.66	12.35	7.12	0.31	0.16	T	T	1.79e-09	4.99e-07	Multiple_Complex
TC0600014220.hg.1	serpin peptidase inhibitor, clade B (ovalbumin), member 9	SERPINB9	37.39	15.7	10.47	1.61	1.16	T	T	1.3e-05	0.0009	Multiple_Complex
TC1400006686.hg.1	CKLF-like MARVEL transmembrane domain containing 5	CMTM5	36.35	9.35	4.16	0.42	0.05	T	F	1.94e-10	7.62e-08	Multiple_Complex
TC0700010603.hg.1	TLR4 interactor with leucine-rich repeats	TRIL	35.45	8.7	3.55	0.28	0.69	T	T	2.51e-09	6.68e-07	Multiple_Complex
TC1400009214.hg.1	bone morphogenetic protein 4	BMP4	35.32	10.11	4.96	2.14	0.94	T	T	0.0061	0.1044	Multiple_Complex
TC0800012387.hg.1	DLC1 Rho GTPase activating protein	DLC1	35.13	8.98	3.84	0.25	0.62	T	F	1.69e-10	6.81e-08	Multiple_Complex
TC0400011359.hg.1	unc-5 netrin receptor C	UNC5C	33.3	8.91	3.86	0.38	0.95	T	F	6.59e-06	0.0005	Multiple_Complex
TC0100010874.hg.1	ral guanine nucleotide dissociation stimulator-like 1	RGL1	32.89	12.21	7.17	0.13	0.49	T	T	9.07e-11	4.06e-08	Multiple_Complex
TC0200015136.hg.1	frizzled-related protein	FRZB	30.55	14.76	9.83	1.34	0.68	T	T	3.88e-05	0.0022	Coding
TC0100013651.hg.1	polyhomeotic homolog 2 (Drosophila); microRNA 3605	PHC2; MIR3605	29.93	10.35	5.44	0.65	0.47	T	T	1.77e-08	3.49e-06	Multiple_Complex
TC1400007566.hg.1	SPARC related modular calcium binding 1	SMOC1	29.92	10.81	5.91	0.73	0.24	T	T	3.95e-07	4.89e-05	Multiple_Complex
TC1000011774.hg.1	sortilin-related VPS10 domain containing receptor 1	SORCS1	29.87	10.98	6.08	0.5	0.53	T	T	2.08e-10	8.03e-08	Multiple_Complex
TC0700012230.hg.1	neuronal cell adhesion molecule	NRCAM	28.81	13.18	8.33	0.91	0.38	T	T	2.12e-08	4.04e-06	Multiple_Complex
TC0700008358.hg.1	collagen, type I, alpha 2	COL1A2	28.45	14.15	9.32	0.47	0.68	T	T	3e-08	5.44e-06	Multiple_Complex
TC0400007169.hg.1	protocadherin 7	PCDH7	28.06	10.26	5.45	0.12	1.09	T	T	7.37e-09	1.69e-06	Multiple_Complex
TC0400012437.hg.1	stimulator of chondrogenesis 1	SCRG1	27.95	8.51	3.7	0.95	0.47	T	F	4.69e-07	5.64e-05	Coding
TC1900010651.hg.1	glia maturation factor, gamma	GMFG	27.35	9.19	4.41	1.3	0.77	T	T	1.66e-07	2.35e-05	Multiple_Complex
TC1400007404.hg.1	ras homolog family member J	RHOJ	27.04	9.43	4.68	0.37	0.6	T	T	4.43e-10	1.53e-07	Multiple_Complex
TC0300008355.hg.1	BOC cell adhesion associated, oncogene regulated	BOC	26.21	12.46	7.75	0.97	0.08	T	T	4.56e-08	7.84e-06	Multiple_Complex
TC0100015598.hg.1	thioredoxin interacting protein	TXNIP	25.66	14.31	9.63	0.61	1.2	T	T	0.0003	0.0104	Multiple_Complex
TC0100017844.hg.1	nidogen 1	NID1	25.65	16.36	11.68	0.56	0.34	T	T	2.3e-07	3.08e-05	Multiple_Complex
TC0500012631.hg.1	early B-cell factor 1	EBF1	25.6	8.85	4.17	0.55	0.21	T	F	7.41e-08	1.17e-05	Multiple_Complex
TC1100009068.hg.1	neural cell adhesion molecule 1	NCAM1	24.89	14.65	10.02	0.29	0.33	T	T	3.61e-10	1.27e-07	Multiple_Complex
TC0300013025.hg.1	butyrylcholinesterase	BCHE	24.79	10.92	6.28	1.12	0.66	T	T	3.46e-06	0.0003	Coding
TC1100012389.hg.1	cell adhesion molecule 1	CADM1	24.73	13.64	9.01	0.35	0.32	T	T	1.87e-13	2.05e-10	Multiple_Complex
TC0100013534.hg.1	lysosomal protein transmembrane 5	LAPTM5	24.5	9.01	4.39	0.49	0.25	T	F	1.08e-12	8.97e-10	Multiple_Complex
TC2200008676.hg.1	SRY box 10	SOX10	24.32	11.66	7.06	0.46	0.85	T	T	1.27e-07	1.85e-05	Multiple_Complex
TC0100016163.hg.1	ADAM metallopeptidase with thrombospondin type 1 motif 4	ADAMTS4	24.12	11.42	6.82	0.49	0.41	T	T	1.14e-08	2.44e-06	Multiple_Complex
TC1100012019.hg.1	sestrin 3	SESN3	23.99	13.46	8.88	0.23	0.89	T	T	1.21e-07	1.79e-05	Multiple_Complex
TC0X00007507.hg.1	ephrin-B1	EFNB1	23.77	12.1	7.53	0.78	0.57	T	T	1.77e-08	3.49e-06	Multiple_Complex
TC2000007670.hg.1	snail family zinc finger 1	SNAI1	23.72	11.59	7.03	0.91	0.33	T	T	5.29e-05	0.0028	Coding
TC0X00010860.hg.1	microRNA 20b	MIR20B	23.58	9.67	5.11	1.57	0.85	T	F	5.15e-05	0.0027	Multiple_Complex
TC0900010773.hg.1	receptor tyrosine kinase-like orphan receptor 2	ROR2	23.57	9.43	4.87	0.21	0.24	T	T	5.8e-09	1.4e-06	Multiple_Complex
TC0500007077.hg.1	natriuretic peptide receptor 3	NPR3	22.7	10.14	5.64	1.97	0.49	T	F	1.71e-05	0.0011	Multiple_Complex
TC1100012775.hg.1	v-ets avian erythroblastosis virus E26 oncogene homolog 1	ETS1	22.25	14.37	9.89	0.17	0.17	T	T	6.76e-12	4.28e-09	Multiple_Complex
TC0600012113.hg.1	bone morphogenetic protein 5	BMP5	21.51	10.75	6.32	0.3	0.16	T	T	1.13e-06	0.0001	Multiple_Complex
TC0500008785.hg.1	early growth response 1	EGR1	21.06	14.51	10.11	1.63	0.85	T	T	0.0002	0.0088	Coding
TC0X00010859.hg.1	microRNA 19b-2	MIR19B2	20.69	12.56	8.19	1.32	1.13	T	T	3.27e-06	0.0003	Multiple_Complex
TC0100011573.hg.1	SET and MYND domain containing 2	SMYD2	20.51	12.34	7.98	0.74	0.25	T	T	8.58e-10	2.68e-07	Multiple_Complex
TC0900010667.hg.1	SPATA31 subfamily C, member 2	SPATA31C2	20.2	9.18	4.85	0.34	0.1	T	T	1.73e-08	3.42e-06	Multiple_Complex
TC1300007774.hg.1	muscleblind-like splicing regulator 2	MBNL2	19.91	9.25	4.93	0.75	0.4	T	T	3.13e-06	0.0003	Multiple_Complex
TC0600007534.hg.1	proline rich 3	PRR3	19.32	12.09	7.82	0.08	0.39	T	T	1.72e-10	6.88e-08	Multiple_Complex
TC0600009332.hg.1	fatty acid binding protein 7, brain	FABP7	19.32	14.32	10.05	0.11	1.08	T	T	2.11e-09	5.76e-07	Coding
TC1200012643.hg.1	erb-b2 receptor tyrosine kinase 3	ERBB3	18.81	15.09	10.85	0.5	0.41	T	T	5.03e-09	1.24e-06	Multiple_Complex
TC1000006891.hg.1	vimentin	VIM	18.47	15.93	11.72	0.46	0.89	T	T	9.17e-11	4.07e-08	Multiple_Complex
TC0X00008394.hg.1	BCL6 corepressor-like 1	BCORL1	18.45	11.95	7.74	0.47	0.44	T	T	1.64e-09	4.67e-07	Multiple_Complex
TC2200007150.hg.1	TIMP metallopeptidase inhibitor 3	TIMP3	18.43	11.19	6.99	0.36	0.2	T	T	8.71e-09	1.94e-06	Multiple_Complex
TC0800010275.hg.1	plasminogen activator, tissue	PLAT	18.38	10.84	6.64	0.67	0.15	T	T	9.81e-08	1.5e-05	Multiple_Complex
TC1800007220.hg.1	ring finger protein 165	RNF165	18.32	10.59	6.39	0.84	0.19	T	T	2.38e-09	6.4e-07	Multiple_Complex
TC2000009357.hg.1	phosphatidylinositol-3,4,5-trisphosphate-dependent Rac exchange factor 1	PREX1	17.76	11.72	7.57	0.46	0.22	T	T	6.7e-08	1.08e-05	Multiple_Complex
TC1300006594.hg.1	tumor necrosis factor receptor superfamily, member 19	TNFRSF19	17.68	8.7	4.56	0.93	0.56	T	F	1.05e-05	0.0007	Multiple_Complex
TC1000011400.hg.1	ankyrin repeat domain 1 (cardiac muscle)	ANKRD1	17.19	7.54	3.44	1.22	0.17	T	F	0.0003	0.0102	Multiple_Complex
TC1700011653.hg.1	sidekick cell adhesion molecule 2	SDK2	17.05	10.64	6.54	0.23	0.5	T	T	5.17e-09	1.27e-06	Multiple_Complex
TC0200015678.hg.1	insulin like growth factor binding protein 5	IGFBP5	16.9	8.9	4.82	0.26	0.21	T	T	0.0044	0.0828	Multiple_Complex
TC1300009147.hg.1	olfactory receptor, family 7, subfamily E, member 104 pseudogene	OR7E104P	16.88	8.64	4.56	1.13	0.73	T	F	3.23e-08	5.78e-06	Multiple_Complex
TC1200009847.hg.1	alpha-2-macroglobulin	A2M	16.87	8.35	4.27	1.27	0.09	T	T	3.69e-05	0.0021	Multiple_Complex
TC1700006772.hg.1	lysine (K)-specific demethylase 6B	KDM6B	16.8	11.78	7.71	0.74	1.41	T	T	1.77e-06	0.0002	Multiple_Complex
TC1100009982.hg.1	dachsous cadherin-related 1	DCHS1	16.78	9.68	5.61	0.08	0.81	T	T	5.56e-07	6.57e-05	Multiple_Complex
TC0300011391.hg.1	ADAM metallopeptidase with thrombospondin type 1 motif 9	ADAMTS9	16.42	8.88	4.85	1.2	0.43	T	F	2.88e-08	5.26e-06	Multiple_Complex
TC0700012224.hg.1	laminin, beta 1	LAMB1	16.21	14.8	10.79	0.26	0.22	T	T	8.6e-12	5.35e-09	Multiple_Complex
TC0900012167.hg.1	gelsolin	GSN	15.63	13.76	9.79	0.38	0.21	T	T	1.98e-10	7.73e-08	Multiple_Complex
TC0100014910.hg.1	transforming growth factor beta receptor III	TGFBR3	15.52	10.71	6.76	0.9	0.57	T	T	1.66e-08	3.31e-06	Multiple_Complex
TC0500011648.hg.1	ephrin-A5	EFNA5	15.38	14.39	10.45	0.59	0.14	T	T	7.08e-09	1.64e-06	Multiple_Complex
TC0500008890.hg.1	protocadherin gamma subfamily C, 3; protocadherin gamma subfamily A, 12; protocadherin gamma subfamily B, 4; protocadherin gamma subfamily A, 8; protocadherin gamma subfamily A, 1; protocadherin gamma subfamily A, 10; protocadherin gamma subfamily A, 11; protocadherin gamma subfamily A, 2; protocadherin gamma subfamily A, 3; protocadherin gamma subfamily A, 4; protocadherin gamma subfamily A, 5; …	PCDHGC3; PCDHGA12; PCDHGB4; PCDHGA8; PCDHGA1; PCDHGA10; PCDHGA11; PCDHGA2; PCDHGA3; PCDHGA4; PCDHGA5; PCDHGA6; PCDHGA7; PCDHGA9; PCDHGB1; PCDHGB2; PCDHGB3; PCDHGB5; PCDHGB6; PCDHGB7; PCDHGC4; PCDHGC5	15.27	11.45	7.52	0.27	0.3	T	T	2.63e-10	9.78e-08	Multiple_Complex
TC1600008164.hg.1	family with sequence similarity 65, member A	FAM65A	15.26	13.17	9.24	0.32	0.4	T	T	5.69e-09	1.38e-06	Multiple_Complex
TC1100007375.hg.1	microRNA 670	MIR670	15.24	9.49	5.56	1.97	0.41	T	T	2.56e-06	0.0002	Multiple_Complex
TC1100010580.hg.1	leucine rich repeat containing 4C	LRRC4C	15	9.32	5.41	0.4	0.15	T	T	6.71e-08	1.08e-05	Multiple_Complex
TC0600009019.hg.1	sine oculis binding protein homolog	SOBP	14.65	11.1	7.22	0.38	0.08	T	T	4.47e-13	4.36e-10	Multiple_Complex
TC0100013545.hg.1	syndecan 3	SDC3	14.64	15.24	11.37	0.07	0.59	T	T	3.8e-07	4.73e-05	Multiple_Complex
TC0X00008017.hg.1	proteolipid protein 1	PLP1	14.55	18.27	14.41	0.21	0.14	T	T	2.91e-09	7.68e-07	Multiple_Complex
TC0600007847.hg.1	cyclin-dependent kinase inhibitor 1A (p21, Cip1)	CDKN1A	14.4	9.91	6.06	0.95	0.72	T	T	2.17e-05	0.0013	Multiple_Complex
TC1700007520.hg.1	cyclin-dependent kinase 5, regulatory subunit 1 (p35)	CDK5R1	14.09	9.66	5.85	0.74	0.05	T	T	1.46e-07	2.1e-05	Multiple_Complex
TC2100008545.hg.1	nuclear receptor interacting protein 1	NRIP1	14	12.88	9.07	0.52	0.43	T	T	1.12e-06	0.0001	Multiple_Complex
TC0800011646.hg.1	hyaluronan synthase 2	HAS2	14	11.01	7.2	0.4	0.64	T	T	1.99e-05	0.0013	Multiple_Complex
TC0100014403.hg.1	KN motif and ankyrin repeat domains 4	KANK4	13.62	9.02	5.26	1.05	0.1	T	T	7.35e-06	0.0005	Multiple_Complex
TC0X00010837.hg.1	muscleblind-like splicing regulator 3	MBNL3	13.55	10.3	6.54	1.09	0.32	T	T	0.0002	0.0074	Multiple_Complex
TC0900010570.hg.1	FERM domain containing 3	FRMD3	13.4	8.63	4.88	0.26	0.61	T	T	0.0002	0.0086	Multiple_Complex
TC0600014361.hg.1	CNKSR family member 3	CNKSR3	13.35	10.4	6.66	0.37	0.62	T	T	2.94e-08	5.36e-06	Multiple_Complex
TC0X00010857.hg.1	microRNA 363	MIR363	13.33	9.48	5.75	0.77	0.76	T	T	7.11e-07	8.02e-05	Multiple_Complex
TC2200007356.hg.1	KDEL (Lys-Asp-Glu-Leu) endoplasmic reticulum protein retention receptor 3	KDELR3	13.33	12.49	8.75	1.42	0.7	T	T	1.45e-05	0.001	Multiple_Complex
TC1600008128.hg.1	CKLF-like MARVEL transmembrane domain containing 3	CMTM3	13.08	12.1	8.39	0.38	0.92	T	T	3.58e-09	9.1e-07	Multiple_Complex
TC0X00006715.hg.1	sex comb on midleg-like 1 (Drosophila)	SCML1	13.06	11.16	7.46	0.63	0.33	T	T	1.7e-10	6.83e-08	Multiple_Complex
TC0200014785.hg.1	fidgetin	FIGN	12.67	13.02	9.36	0.32	0.27	T	T	1.2e-05	0.0008	Multiple_Complex
TC1000009830.hg.1	coiled-coil domain containing 3	CCDC3	12.55	8.58	4.93	0.73	0.78	T	T	7.03e-07	7.96e-05	Multiple_Complex
TC0X00007558.hg.1	neuroligin 3	NLGN3	12.55	13.43	9.78	0.23	0.65	T	T	7.49e-07	8.39e-05	Multiple_Complex
TC1700008794.hg.1	SRY box 9	SOX9	12.53	10.9	7.25	0.95	0.69	T	T	2.58e-05	0.0015	Multiple_Complex
TC1100007400.hg.1	tetraspanin 18	TSPAN18	12.41	13.33	9.7	1	0.43	T	T	7.82e-06	0.0006	Multiple_Complex
TC0200009189.hg.1	glycophorin C (Gerbich blood group)	GYPC	12.27	11.59	7.97	0.51	0.72	T	T	9.36e-09	2.07e-06	Multiple_Complex
TC1200012254.hg.1	vacuolar protein sorting 37 homolog B (S. cerevisiae)	VPS37B	12.2	10.23	6.62	0.66	0.67	T	T	1.78e-07	2.49e-05	Multiple_Complex
TC1300009966.hg.1	keratin-associated protein 6-2; novel transcript	LOC647264; RP11-473M10.3	12.2	7.76	4.15	0.89	0.1	T	T	1.9e-06	0.0002	Multiple_Complex
TC0100016254.hg.1	retinoid X receptor gamma	RXRG	12.14	7.36	3.76	1.4	0.29	T	F	6.03e-06	0.0005	Multiple_Complex
TC0500012164.hg.1	GDNF family receptor alpha 3	GFRA3	12.1	7.65	4.06	0.92	0.42	T	F	0.0002	0.0068	Multiple_Complex
TC0300006968.hg.1	CKLF-like MARVEL transmembrane domain containing 7	CMTM7	11.95	14.11	10.53	0.36	0.96	T	T	4.43e-05	0.0024	Multiple_Complex
TC0100015945.hg.1	thrombospondin 3	THBS3	11.92	10.82	7.24	0.53	0.59	T	T	8.01e-09	1.82e-06	Multiple_Complex
TC0100007147.hg.1	paired box 7	PAX7	11.78	8.12	4.57	0.69	0.16	T	T	2.08e-08	3.99e-06	Multiple_Complex
TC0100013229.hg.1	heparan sulfate proteoglycan 2	HSPG2	11.77	12.4	8.85	0.2	0.49	T	T	1.44e-08	2.94e-06	Multiple_Complex
TC1200011882.hg.1	transient receptor potential cation channel, subfamily V, member 4	TRPV4	11.73	9.57	6.02	0.59	0.25	T	T	2.18e-08	4.11e-06	Multiple_Complex
TC0900008776.hg.1	multivesicular body subunit 12B	MVB12B	11.62	13.06	9.52	0.24	0.25	T	T	2.59e-08	4.77e-06	Multiple_Complex
TC1400010651.hg.1	delta-like 1 homolog (Drosophila)	DLK1	11.33	8.28	4.78	2.82	1.06	T	T	0.0027	0.0585	Multiple_Complex
TC2100007911.hg.1	keratin associated protein 21-1	KRTAP21-1	11.29	8.12	4.62	0.63	0.55	T	F	6.89e-06	0.0005	Coding
TC0500008125.hg.1	Rho-related BTB domain containing 3	RHOBTB3	11.28	10.18	6.69	0.89	0.74	T	T	3.84e-06	0.0003	Multiple_Complex
TC0100015234.hg.1	solute carrier family 16, member 4	SLC16A4	11.15	9.42	5.94	0.47	0.34	T	T	1.91e-06	0.0002	Multiple_Complex
TC0100013182.hg.1	calcium/calmodulin-dependent protein kinase II inhibitor 1	CAMK2N1	10.99	15.28	11.83	0.51	0.42	T	T	1.39e-07	2e-05	Multiple_Complex
TC1700008511.hg.1	T-box 2	TBX2	10.98	8.03	4.57	0.27	0.56	T	T	0.0001	0.0055	Multiple_Complex
TC0900010886.hg.1	patched 1	PTCH1	10.96	13.43	9.98	0.49	0.19	T	T	6.5e-09	1.54e-06	Multiple_Complex
TC0500013323.hg.1	Salzman2013 ANNOTATED, INTERNAL, ncRNA, OVEXON best transcript TCONS_l2_00023773	TCONS_l2_00023773	10.81	11.81	8.37	0.47	0.63	T	T	3.64e-07	4.57e-05	Multiple_Complex
TC1000009725.hg.1	Scm-like with four mbt domains 2	SFMBT2	10.78	9.9	6.47	0.14	0.59	T	T	1.08e-09	3.23e-07	Multiple_Complex
TC0700012898.hg.1	TRPM8 channel-associated factor 1	TCAF1	10.63	11.31	7.9	0.38	1.1	T	T	8.91e-07	9.66e-05	Multiple_Complex
TC1300008892.hg.1	lysophosphatidic acid receptor 6	LPAR6	10.58	9.46	6.05	0.9	0.74	T	T	0.0002	0.0081	Multiple_Complex
TC1500009504.hg.1	pygopus family PHD finger 1	PYGO1	10.54	9.39	5.99	0.95	0.59	T	T	1.37e-06	0.0001	Multiple_Complex
TC0500007684.hg.1	Salzman2013 ANNOTATED, INTERNAL, ncRNA, OVERLAPTX, OVEXON best transcript TCONS_l2_00023407	TCONS_l2_00023407	10.5	10.72	7.33	0.94	0.4	T	T	1.7e-06	0.0002	Multiple_Complex
TC0100010775.hg.1	sterol O-acyltransferase 1	SOAT1	10.5	9.81	6.42	0.3	0.82	T	T	6.5e-10	2.12e-07	Multiple_Complex
TC0200009470.hg.1	histamine N-methyltransferase	HNMT	10.43	11.24	7.86	0.42	0.57	T	T	1.38e-06	0.0001	Multiple_Complex
TC1100009101.hg.1	zinc finger and BTB domain containing 16	ZBTB16	10.39	8.59	5.21	0.9	0.36	T	T	8.91e-08	1.37e-05	Multiple_Complex
TC0900007576.hg.1	annexin A1	ANXA1	10.35	8.41	5.04	0.16	0.73	T	T	0.001	0.0292	Multiple_Complex
TC1000011370.hg.1	actin, alpha 2, smooth muscle, aorta	ACTA2	10.32	9.16	5.8	0.09	0.21	T	T	0.0003	0.0113	Multiple_Complex
TC1900011734.hg.1	melanoma inhibitory activity; RAB4B, member RAS oncogene family; MIA-RAB4B readthrough (NMD candidate)	MIA; RAB4B; MIA-RAB4B	10.31	8.43	5.06	0.97	0.12	T	T	5.82e-07	6.83e-05	Multiple_Complex
TC0600013361.hg.1	Cbp/p300-interacting transactivator, with Glu/Asp rich carboxy-terminal domain, 2	CITED2	10.25	15.79	12.43	0.27	0.13	T	T	6.32e-07	7.25e-05	Coding
TC1800008317.hg.1	zinc finger protein 521	ZNF521	10.24	11.85	8.49	0.22	0.37	T	T	9.28e-10	2.84e-07	Multiple_Complex
TC0500011448.hg.1	arrestin domain containing 3	ARRDC3	10.22	11.75	8.4	1.45	1.66	T	T	0.0001	0.0054	Multiple_Complex
TC0300008991.hg.1	splA/ryanodine receptor domain and SOCS box containing 4	SPSB4	10.14	11.5	8.16	0.96	0.13	T	T	1.68e-06	0.0002	Multiple_Complex
TC0200010726.hg.1	transmembrane protein 169	TMEM169	10.11	9.6	6.26	0.13	0.44	T	T	8.82e-11	3.98e-08	Coding
TC1200007844.hg.1	RNA binding motif, single stranded interacting protein 2	RBMS2	10.1	11.79	8.45	0.33	0.41	T	T	1.07e-09	3.21e-07	Multiple_Complex
TC1200007769.hg.1	phosphodiesterase 1B, calmodulin-dependent	PDE1B	10.03	9.1	5.77	0.53	0.43	T	T	1.46e-09	4.25e-07	Multiple_Complex
TC1800007850.hg.1	collectin sub-family member 12	COLEC12	9.94	8.66	5.35	0.91	0.44	T	T	4.96e-06	0.0004	Multiple_Complex
TC1600010375.hg.1	colorectal neoplasia differentially expressed (non-protein coding)	CRNDE	9.86	13.43	10.13	0.45	0.58	T	T	5.31e-09	1.29e-06	Multiple_Complex
TC1900008856.hg.1	tweety family member 1	TTYH1	9.84	12.34	9.05	0.95	0.45	T	T	2.99e-06	0.0003	Multiple_Complex
TC0100015596.hg.1	limb and CNS expressed 1 like	LIX1L	9.84	11.36	8.06	0.26	0.77	T	T	1.54e-07	2.19e-05	Multiple_Complex
TC0800011041.hg.1	matrix metallopeptidase 16 (membrane-inserted)	MMP16	9.79	13.79	10.5	1.05	0.59	T	T	0.0026	0.0582	Multiple_Complex
TC0300008654.hg.1	rhophilin associated tail protein 1B	ROPN1B	9.66	8.19	4.92	1.48	0.26	T	T	0.0002	0.008	Multiple_Complex
TC0100015093.hg.1	olfactomedin 3	OLFM3	9.59	7.79	4.53	0.22	0.59	T	F	2.86e-07	3.7e-05	Multiple_Complex
TC2000007830.hg.1	transcription factor AP-2 gamma (activating enhancer binding protein 2 gamma)	TFAP2C	9.46	10.96	7.72	0.67	0.5	T	T	5.01e-05	0.0027	Coding
TC1000009893.hg.1	integrin alpha 8	ITGA8	9.34	8.3	5.07	1.46	0.68	T	T	0.0003	0.0123	Multiple_Complex
TC1000007976.hg.1	carbohydrate (chondroitin 6) sulfotransferase 3	CHST3	9.16	7.89	4.7	0.35	0.27	T	T	4.03e-10	1.41e-07	Multiple_Complex
TC0500007549.hg.1	zinc finger, SWIM-type containing 6	ZSWIM6	9.16	14.62	11.43	0.11	0.23	T	T	1.02e-08	2.22e-06	Multiple_Complex
TC0900007828.hg.1	SPATA31 subfamily C, member 1	SPATA31C1	9.07	9.32	6.13	0.35	0.24	T	T	3.97e-07	4.91e-05	Multiple_Complex
TC0300009629.hg.1	SOX2 overlapping transcript	SOX2-OT	9.03	10.57	7.4	0.65	0.51	T	T	0.0057	0.1003	Multiple_Complex
TC1100009168.hg.1	SID1 transmembrane family, member 2	SIDT2	9.03	11.51	8.34	0.36	0.41	T	T	2.11e-10	8.13e-08	Multiple_Complex
TC1800007340.hg.1	DCC netrin 1 receptor	DCC	8.98	8.49	5.32	1.46	0.41	T	T	0.0003	0.0126	Multiple_Complex
TC1600010561.hg.1	cadherin 11, type 2, OB-cadherin (osteoblast)	CDH11	8.89	10.26	7.1	0.75	0.31	T	T	0.003	0.0636	Multiple_Complex
TC0500013336.hg.1	single-stranded DNA binding protein 2	SSBP2	8.89	15.29	12.14	0.52	0.73	T	T	6.96e-08	1.11e-05	Multiple_Complex
TC0200007115.hg.1	CAP-GLY domain containing linker protein family, member 4	CLIP4	8.87	8.64	5.49	0.21	0.68	T	F	2.2e-09	5.95e-07	Multiple_Complex
TC0300007745.hg.1	ADP-ribosylation factor like GTPase 6 interacting protein 5	ARL6IP5	8.86	15.24	12.09	0.24	0.29	T	T	1.04e-09	3.15e-07	Multiple_Complex
TC0100009364.hg.1	colony stimulating factor 1 (macrophage)	CSF1	8.84	10.37	7.23	0.77	0.41	T	T	0.0008	0.0233	Multiple_Complex
TC1100013229.hg.1	FXYD domain containing ion transport regulator 6; FXYD6-FXYD2 readthrough; FXYD domain containing ion transport regulator 2	FXYD6; FXYD6-FXYD2; FXYD2	8.72	9.26	6.13	0.31	0.37	T	T	1.35e-09	3.95e-07	Multiple_Complex
TC2100006909.hg.1	hormonally up-regulated Neu-associated kinase	HUNK	8.69	10.4	7.28	0.41	0.55	T	T	8.03e-07	8.9e-05	Multiple_Complex
TC2100007072.hg.1	tetratricopeptide repeat domain 3	TTC3	8.66	14.27	11.15	0.26	0.55	T	T	1.25e-06	0.0001	Multiple_Complex
TC1200008211.hg.1		RP11-274M17.2	8.63	9.37	6.26	0.25	0.26	T	T	1.03e-09	3.11e-07	Multiple_Complex
TC2200008346.hg.1	meningioma (disrupted in balanced translocation) 1	MN1	8.58	8.91	5.8	0.59	0.43	T	T	1.03e-06	0.0001	Multiple_Complex
TC0400012818.hg.1	cyclin G2	CCNG2	8.57	12.81	9.71	0.51	1.31	T	T	4.53e-05	0.0025	Multiple_Complex
TC0500011347.hg.1	hyaluronan and proteoglycan link protein 1	HAPLN1	8.56	9.1	6	2.07	0.43	T	T	0.0381	0.3179	Multiple_Complex
TC0500013301.hg.1	Dab, mitogen-responsive phosphoprotein, homolog 2 (Drosophila)	DAB2	8.55	10.58	7.49	0.31	1.01	T	T	2.59e-06	0.0002	Multiple_Complex
TC1100008736.hg.1	N-acetylated alpha-linked acidic dipeptidase 2	NAALAD2	8.45	9.67	6.59	0.78	0.75	T	T	4.19e-05	0.0023	Multiple_Complex
TC0100010921.hg.1	hemicentin 1	HMCN1	8.37	11.98	8.92	0.42	0.23	T	T	6.91e-08	1.11e-05	Multiple_Complex
TC0X00010861.hg.1	microRNA 18b	MIR18B	8.34	9.48	6.42	1.13	0.62	T	T	1.84e-05	0.0012	Multiple_Complex
TC0100017083.hg.1	RAB7B, member RAS oncogene family	RAB7B	8.28	8.2	5.15	0.28	0.37	T	T	1.23e-09	3.65e-07	Coding
TC0400011643.hg.1	calcium/calmodulin-dependent protein kinase II delta	CAMK2D	8.27	12.72	9.67	0.73	0.43	T	T	6.03e-06	0.0005	Multiple_Complex
TC0400008318.hg.1	tet methylcytosine dioxygenase 2	TET2	8.26	8.97	5.93	0.3	0.88	T	T	1.39e-05	0.0009	Multiple_Complex
TC0X00010858.hg.1	microRNA 92a-2	MIR92A2	8.23	8.81	5.77	1.65	0.69	T	T	0.0019	0.0458	Multiple_Complex
TC0600011376.hg.1	protein phosphatase 1, regulatory subunit 18	PPP1R18	8.22	10.3	7.27	0.37	0.29	T	T	7.38e-08	1.17e-05	Multiple_Complex
TC2200006495.hg.1		AC006548.19	8.15	8.96	5.93	1.07	0.41	T	T	7.49e-05	0.0037	Multiple_Complex
TC1600011560.hg.1	metastasis suppressor 1-like	MTSS1L	8	12.27	9.27	0.53	0.5	T	T	8.91e-07	9.66e-05	Multiple_Complex
TC1200007653.hg.1	nuclear receptor subfamily 4, group A, member 1	NR4A1	7.98	13.46	10.47	0.35	0.88	T	T	3.5e-06	0.0003	Multiple_Complex
TC0800009856.hg.1	early growth response 3	EGR3	7.94	6.53	3.54	1.35	0.22	T	F	0.0055	0.0975	Multiple_Complex
TC0700010857.hg.1	GLI family zinc finger 3	GLI3	7.91	12.79	9.8	0.43	0.21	T	T	1.63e-06	0.0002	Multiple_Complex
TC1200010839.hg.1	integrin alpha 5	ITGA5	7.85	11.02	8.05	0.96	0.4	T	T	8.66e-07	9.44e-05	Multiple_Complex
TC0600012247.hg.1	collagen, type IX, alpha 1	COL9A1	7.84	10.95	7.98	0.23	0.11	T	T	0.0003	0.01	Multiple_Complex
TC1400007320.hg.1	dishevelled-binding antagonist of beta-catenin 1	DACT1	7.83	10.14	7.17	0.23	0.74	T	T	0.001	0.0284	Multiple_Complex
TC2000006501.hg.1	signal-regulatory protein alpha	SIRPA	7.78	9.83	6.87	0.09	0.32	T	T	2.04e-09	5.64e-07	Coding
TC0300007392.hg.1	family with sequence similarity 212, member A	FAM212A	7.77	6.52	3.57	1.04	0.13	T	T	7.73e-08	1.22e-05	Coding
TC0600011912.hg.1	solute carrier family 35 (adenosine 3-phospho 5-phosphosulfate transporter), member B2; microRNA 4647	SLC35B2; MIR4647	7.74	15.2	12.25	0.19	0.24	T	T	9.02e-09	2e-06	Multiple_Complex
TC1500007633.hg.1	SMAD family member 3	SMAD3	7.74	11.28	8.33	0.11	0.42	T	T	1.71e-07	2.4e-05	Multiple_Complex
TC1600011398.hg.1	matrix metallopeptidase 2	MMP2	7.6	15.5	12.57	0.75	0.19	T	T	2.43e-08	4.53e-06	Multiple_Complex
TC0200008801.hg.1	sulfotransferase family 1C member 4	SULT1C4	7.6	11.59	8.66	0.19	0.46	T	T	2.39e-06	0.0002	Multiple_Complex
TC0700007132.hg.1	FK506 binding protein 9	FKBP9	7.59	12.12	9.2	0.38	0.62	T	T	3.13e-07	4e-05	Multiple_Complex
TC2000007117.hg.1	additional sex combs like transcriptional regulator 1	ASXL1	7.52	12.8	9.89	0.21	0.73	T	T	2.25e-08	4.23e-06	Multiple_Complex
TC0500013322.hg.1	NLR family, apoptosis inhibitory protein	NAIP	7.48	9.49	6.59	0.76	0.38	T	T	2.49e-06	0.0002	Multiple_Complex
TC1100006726.hg.1	sphingomyelin phosphodiesterase 1, acid lysosomal	SMPD1	7.48	8.13	5.23	0.89	0.4	T	F	4.73e-07	5.69e-05	Multiple_Complex
TC1900008057.hg.1	ZFP36 ring finger protein	ZFP36	7.48	9.96	7.05	0.78	0.23	T	T	0.0005	0.0172	Coding
TC1100012037.hg.1	mastermind-like transcriptional coactivator 2	MAML2	7.41	11.35	8.46	0.13	0.2	T	T	6.96e-05	0.0035	Multiple_Complex
TC0300009916.hg.1	hes family bHLH transcription factor 1	HES1	7.37	12.84	9.96	0.87	2.27	T	T	0.0256	0.2557	Multiple_Complex
TC0500013317.hg.1	glucuronidase, beta pseudogene; Homo sapiens glucuronidase, beta pseudogene (SMA4), transcript variant 1, non-coding RNA.; Jeck2013, Salzman2013 ANNOTATED, INTERNAL, ncRNA, OVEXON best transcript NR_029426; Salzman2013 ALT_ACCEPTOR, INTERNAL, intronic, ncRNA, OVERLAPTX, OVEXON best transcript NR_024054; Salzman2013 ALT_ACCEPTOR, ALT_DONOR, INTERNAL, intronic, ncRNA, OVEXON best transcript NR_0294…	SMA4; LOC100170939	7.34	15.69	12.82	0.41	0.45	T	T	1.27e-06	0.0001	Multiple_Complex
TC1400007154.hg.1	guanine nucleotide binding protein (G protein), gamma 2	GNG2	7.3	12.81	9.94	0.88	0.29	T	T	1.18e-05	0.0008	Multiple_Complex
TC1200009867.hg.1		RP11-599J14.2	7.25	10.84	7.98	0.46	0.37	T	T	4.86e-05	0.0026	Multiple_Complex
TC1600010181.hg.1	neuropilin (NRP) and tolloid (TLL)-like 2	NETO2	7.16	14.37	11.54	0.53	0.19	T	T	2.3e-08	4.31e-06	Multiple_Complex
TC1900011774.hg.1	epithelial membrane protein 3	EMP3	7.08	14.54	11.72	1.06	0.41	T	T	5e-06	0.0004	Multiple_Complex
TC0100016366.hg.1	kinesin-associated protein 3	KIFAP3	7.05	10.22	7.4	0.38	0.64	T	T	4.34e-07	5.29e-05	Multiple_Complex
TC2000010002.hg.1	nuclear receptor coactivator 6	NCOA6	7.05	9.54	6.73	0.3	0.56	T	T	1.08e-06	0.0001	Multiple_Complex
TC0300013938.hg.1	vestigial-like family member 4	VGLL4	7.02	11.03	8.21	0.71	0.46	T	T	6.69e-07	7.62e-05	Multiple_Complex
TC0100011267.hg.1	ATPase, Ca++ transporting, plasma membrane 4	ATP2B4	6.98	13.41	10.61	0.57	0.81	T	T	2.18e-07	2.93e-05	Multiple_Complex
TC1000012579.hg.1	slit guidance ligand 1; ARHGAP19-SLIT1 readthrough (NMD candidate)	SLIT1; ARHGAP19-SLIT1	6.98	8.72	5.91	1.47	0.27	T	T	0.0004	0.0127	Multiple_Complex
TC0X00009341.hg.1	dystrophin	DMD	6.96	11.91	9.11	0.33	0.69	T	T	5.71e-06	0.0004	Multiple_Complex
TC0500012567.hg.1	fatty acid hydroxylase domain containing 2	FAXDC2	6.96	12.53	9.73	1.79	0.45	T	T	0.0037	0.0745	Multiple_Complex
TC1600008991.hg.1	lipase maturation factor 1	LMF1	6.96	10.57	7.77	0.17	0.11	T	T	8.76e-09	1.95e-06	Multiple_Complex
TC0800007460.hg.1	heparan-alpha-glucosaminide N-acetyltransferase	HGSNAT	6.94	11.31	8.51	0.13	0.48	T	T	8.14e-06	0.0006	Multiple_Complex
TC1200007809.hg.1	growth differentiation factor 11	GDF11	6.92	8.65	5.86	0.49	0.67	T	T	1.14e-07	1.7e-05	Coding
TC0200014851.hg.1	LDL receptor related protein 2	LRP2	6.88	7.64	4.86	0.32	0.52	T	T	0.0006	0.0199	Multiple_Complex
TC0600008757.hg.1	proline-rich nuclear receptor coactivator 1	PNRC1	6.86	15.11	12.33	0.73	0.75	T	T	5.5e-05	0.0029	Multiple_Complex
TC0200010658.hg.1	carbamoyl-phosphate synthase 1	CPS1	6.81	10.99	8.22	0.65	0.45	T	T	1.01e-06	0.0001	Multiple_Complex
TC1400008816.hg.1	protein kinase D1	PRKD1	6.78	9.54	6.78	0.16	0.23	T	T	5.85e-07	6.86e-05	Multiple_Complex
TC0200010157.hg.1	integrin alpha 4	ITGA4	6.74	7.53	4.77	1.59	0.05	T	T	0.0004	0.0141	Multiple_Complex
TC0800009619.hg.1	cathepsin B	CTSB	6.71	13.84	11.09	0.47	0.18	T	T	7.87e-07	8.76e-05	Multiple_Complex
TC0100008938.hg.1	LIM domain only 4	LMO4	6.7	14.64	11.9	0.49	0.24	T	T	7.73e-10	2.46e-07	Multiple_Complex
TC1900010632.hg.1	sirtuin 2	SIRT2	6.7	8.95	6.21	1.28	0.28	T	T	1.09e-07	1.65e-05	Multiple_Complex
TC1000008995.hg.1	attractin-like 1	ATRNL1	6.69	13.19	10.44	0.26	0.33	T	T	1.62e-07	2.3e-05	Multiple_Complex
TC0100014040.hg.1	phosphoinositide-3-kinase, regulatory subunit 3 (gamma)	PIK3R3	6.67	12.65	9.91	0.56	0.38	T	T	1.7e-07	2.39e-05	Multiple_Complex
TC2000006674.hg.1	phospholipase C, beta 4	PLCB4	6.63	10.41	7.68	0.48	0.1	T	T	8.79e-05	0.0042	Multiple_Complex
TC1900011944.hg.1	F-box protein 17	FBXO17	6.62	9.48	6.76	0.22	0.79	T	T	1.63e-06	0.0002	Multiple_Complex
TC0200010164.hg.1	sperm specific antigen 2	SSFA2	6.61	8.45	5.72	0.27	1	T	T	4.5e-05	0.0025	Multiple_Complex
TC1700012191.hg.1	CD68 molecule	CD68	6.57	7.13	4.41	1.04	0.31	T	T	5.68e-05	0.003	Coding
TC1100012350.hg.1	dopamine receptor D2	DRD2	6.56	7.57	4.86	1.36	0.37	T	F	7.65e-05	0.0038	Multiple_Complex
TC1500009795.hg.1	immunoglobulin superfamily, DCC subclass, member 3	IGDCC3	6.55	12.77	10.05	1.11	0.56	T	T	1.76e-05	0.0011	Multiple_Complex
TC0300006791.hg.1	K(lysine) acetyltransferase 2B	KAT2B	6.55	7.69	4.98	0.24	0.58	T	T	5.73e-07	6.73e-05	Multiple_Complex
TC0400011949.hg.1	mastermind-like transcriptional coactivator 3	MAML3	6.54	8.69	5.98	0.24	0.18	T	T	0.0003	0.0116	Multiple_Complex
TC1000012011.hg.1	regulator of G-protein signaling 10	RGS10	6.54	12.48	9.77	0.19	0.44	T	T	4.7e-08	8.04e-06	Multiple_Complex
TC1200012159.hg.1	musashi RNA binding protein 1	MSI1	6.53	15.31	12.6	0.16	0.41	T	T	7.04e-10	2.28e-07	Multiple_Complex
TC1000008236.hg.1	tetraspanin 14	TSPAN14	6.52	12.85	10.14	0.27	0.17	T	T	3.06e-08	5.53e-06	Multiple_Complex
TC0700006529.hg.1	extracellular leucine-rich repeat and fibronectin type III domain containing 1	ELFN1	6.51	9.96	7.26	0.86	0.44	T	T	2.63e-05	0.0016	Multiple_Complex
TC0500013319.hg.1	glucuronidase, beta pseudogene 9	GUSBP9	6.48	14.91	12.21	0.48	0.38	T	T	1.6e-06	0.0002	Multiple_Complex
TC0500013324.hg.1	Homo sapiens glucuronidase, beta pseudogene 9 (GUSBP9), non-coding RNA.; Salzman2013 ANNOTATED, INTERNAL, ncRNA, OVEXON best transcript TCONS_l2_00023779	GUSBP9; TCONS_l2_00023779	6.47	14.69	11.99	0.45	0.39	T	T	8.56e-07	9.35e-05	Multiple_Complex
TC1600011483.hg.1	lipopolysaccharide-induced TNF factor	LITAF	6.43	15.39	12.7	0.07	0.56	T	T	2.51e-08	4.62e-06	Multiple_Complex
TC1300008668.hg.1	lipoma HMGIC fusion partner	LHFP	6.42	10.64	7.96	0.36	1.41	T	T	0.0008	0.0245	Multiple_Complex
TC1000007361.hg.1		RP11-96F8.1	6.39	7.71	5.03	0.86	0.36	T	T	0.0001	0.0053	Multiple_Complex
TC1300007104.hg.1	leucine-rich repeats and calponin homology (CH) domain containing 1	LRCH1	6.38	11.35	8.68	0.2	0.4	T	T	1.14e-07	1.71e-05	Multiple_Complex
TC0200007446.hg.1	protein kinase C, epsilon	PRKCE	6.37	9.73	7.06	0.7	0.51	T	T	1.02e-07	1.54e-05	Multiple_Complex
TC1700012277.hg.1	CDK5 regulatory subunit associated protein 3	CDK5RAP3	6.33	12.59	9.93	0.55	0.35	T	T	9.72e-07	0.0001	Multiple_Complex
TC1000009067.hg.1	G protein-coupled receptor kinase 5	GRK5	6.3	6.83	4.17	0.77	0.5	T	T	3.38e-08	5.99e-06	Multiple_Complex
TC1200012043.hg.1	mediator complex subunit 13-like	MED13L	6.3	13.96	11.3	0.43	0.32	T	T	4.26e-07	5.21e-05	Multiple_Complex
TC1800009086.hg.1	zinc finger protein 516	ZNF516	6.29	9.33	6.68	0.05	0.32	T	T	2.55e-10	9.52e-08	Multiple_Complex
TC2200007303.hg.1	CDC42 effector protein (Rho GTPase binding) 1	CDC42EP1	6.28	11.76	9.11	0.63	0.56	T	T	2.4e-06	0.0002	Multiple_Complex
TC0700010689.hg.1	retinitis pigmentosa 9 pseudogene	RP9P	6.28	8.41	5.76	0.07	0.54	T	T	6.89e-09	1.62e-06	Multiple_Complex
TC2000008242.hg.1	ring finger protein 24	RNF24	6.27	12.72	10.07	0.23	0.08	T	T	0.0002	0.0089	Multiple_Complex
TC1500007829.hg.1	lysyl oxidase-like 1	LOXL1	6.26	12.16	9.51	0.27	0.41	T	T	1.15e-06	0.0001	Multiple_Complex
TC0800008760.hg.1		RP11-959I15.1	6.23	6.62	3.98	0.5	0.63	T	T	1.95e-06	0.0002	Multiple_Complex
TC0100016027.hg.1	Rho guanine nucleotide exchange factor 11	ARHGEF11	6.19	7.75	5.12	0.21	0.38	T	T	2.18e-08	4.11e-06	Multiple_Complex
TC1100010718.hg.1	LDL receptor related protein 4	LRP4	6.18	10.16	7.53	0.26	0.13	T	T	5.82e-07	6.83e-05	Multiple_Complex
TC0600012554.hg.1	BTB and CNC homology 1, basic leucine zipper transcription factor 2	BACH2	6.17	7.84	5.22	0.08	0.27	T	T	1.81e-08	3.56e-06	Multiple_Complex
TC0500007697.hg.1		RP11-589F5.4	6.11	14.79	12.18	0.42	0.31	T	T	5.6e-07	6.6e-05	Multiple_Complex
TC1600010732.hg.1	NAD(P)H dehydrogenase, quinone 1	NQO1	6.1	14.48	11.87	0.19	0.24	T	T	0.0004	0.0132	Multiple_Complex
TC1700012460.hg.1	ATP binding cassette subfamily A member 5	ABCA5	6.07	7.96	5.36	0.51	0.25	T	T	1.81e-05	0.0012	Multiple_Complex
TC1700009619.hg.1	discs, large homolog 4 (Drosophila)	DLG4	6.06	11.76	9.16	0.55	0.61	T	T	8.46e-07	9.26e-05	Multiple_Complex
TC1700008549.hg.1	tetratricopeptide repeat, ankyrin repeat and coiled-coil containing 2	TANC2	6.05	10.11	7.52	0.71	0.19	T	T	6.26e-06	0.0005	Multiple_Complex
TC0900007457.hg.1	contactin associated protein-like 3 pseudogene 2; contactin associated protein-like 3	CNTNAP3P2; CNTNAP3	5.94	8.27	5.7	1.07	1.11	T	T	0.0452	0.3472	Multiple_Complex
TC1400009973.hg.1	ribosomal protein S6 kinase, 90kDa, polypeptide 5	RPS6KA5	5.93	8.84	6.27	0.65	0.89	T	T	0.0055	0.0975	Multiple_Complex
TC0200010636.hg.1	microtubule associated protein 2	MAP2	5.88	11.28	8.72	1.21	0.35	T	T	0.0019	0.0463	Multiple_Complex
TC0700010899.hg.1	polymerase (RNA) II (DNA directed) polypeptide J4, pseudogene	POLR2J4	5.86	8.58	6.03	0.24	0.04	T	T	7.06e-09	1.64e-06	Multiple_Complex
TC0800010002.hg.1	dual specificity phosphatase 4	DUSP4	5.86	9.86	7.31	1.36	0.22	T	T	0.0065	0.1087	Multiple_Complex
TC2200007312.hg.1	lectin, galactoside-binding, soluble, 1	LGALS1	5.85	8.38	5.83	1.24	0.43	T	T	0.0001	0.0049	Multiple_Complex
TC0200016559.hg.1	Bardet-Biedl syndrome 5	BBS5	5.84	8.46	5.91	0.3	0.32	T	T	1.13e-08	2.42e-06	Multiple_Complex
TC0X00011102.hg.1	CD99 molecule-like 2	CD99L2	5.84	10.23	7.69	0.31	0.27	T	T	2.25e-07	3.01e-05	Multiple_Complex
TC0500011004.hg.1	glucuronidase, beta pseudogene 3	GUSBP3	5.81	13.83	11.3	0.32	0.31	T	T	7.36e-07	8.27e-05	Multiple_Complex
TC0100010218.hg.1	kin of IRRE like (Drosophila)	KIRREL	5.8	9.96	7.42	0.55	0.25	T	T	6.54e-06	0.0005	Multiple_Complex
TC1100011744.hg.1	GRB2-associated binding protein 2	GAB2	5.78	7.24	4.71	0.4	0.25	T	T	1.5e-05	0.001	Multiple_Complex
TC1_KI270711v1_random00006432.hg.1		AC240274.1	5.76	12.35	9.82	0.59	0.26	T	T	5.58e-06	0.0004	Coding
TC0400008725.hg.1	protocadherin 10	PCDH10	5.76	9.22	6.69	1.11	0.84	T	T	0.0058	0.1011	Multiple_Complex
TC1200007153.hg.1	PTPRF interacting protein, binding protein 1 (liprin beta 1)	PPFIBP1	5.76	13.03	10.5	0.29	0.38	T	T	5.3e-07	6.29e-05	Multiple_Complex
TC0100018481.hg.1	notch 2 N-terminal like	NOTCH2NL	5.74	8.91	6.39	0.33	0.45	T	T	6.76e-08	1.09e-05	Coding
TC2000009128.hg.1	zinc fingers and homeoboxes 3	ZHX3	5.74	8.65	6.13	0.22	0.12	T	T	3.61e-10	1.27e-07	Multiple_Complex
TC1700006798.hg.1	microRNA 4521	MIR4521	5.73	12.23	9.71	0.8	0.92	T	T	0.0223	0.2362	Multiple_Complex
TC1600007992.hg.1	ADP-ribosylation factor like GTPase 2 binding protein	ARL2BP	5.64	12.46	9.97	0.28	0.1	T	T	9.64e-08	1.48e-05	Multiple_Complex
TC1200010702.hg.1	small cell adhesion glycoprotein	SMAGP	5.62	10.07	7.58	1.25	0.97	T	T	0.01	0.1451	Multiple_Complex
TC2000008852.hg.1	nucleolar protein 4-like	NOL4L	5.6	12.76	10.28	0.29	0.43	T	T	3.19e-05	0.0019	Multiple_Complex
TC1000011168.hg.1	zinc finger, CCHC domain containing 24	ZCCHC24	5.59	8	5.52	0.67	0.42	T	T	1.14e-05	0.0008	Coding
TC1900011936.hg.1	zinc finger protein 781	ZNF781	5.59	6.18	3.7	0.09	0.39	T	F	7.55e-06	0.0006	Multiple_Complex
TC1600010825.hg.1	zinc finger homeobox 3	ZFHX3	5.57	6.07	3.59	1	0.47	T	F	4.26e-05	0.0024	Multiple_Complex
TC1200010806.hg.1	mitogen-activated protein kinase kinase kinase 12	MAP3K12	5.56	9.16	6.68	0.44	0.37	T	T	4.88e-06	0.0004	Multiple_Complex
TC0900008865.hg.1	cerebral endothelial cell adhesion molecule	CERCAM	5.56	9.25	6.77	0.77	0.41	T	T	1.24e-06	0.0001	Multiple_Complex
TC1300008894.hg.1	regulator of chromosome condensation (RCC1) and BTB (POZ) domain containing protein 2	RCBTB2	5.56	10.71	8.23	0.3	0.7	T	T	9.7e-07	0.0001	Multiple_Complex
TC0100018479.hg.1	notch 2 N-terminal like	NOTCH2NL	5.53	12.42	9.95	0.5	0.59	T	T	3.98e-08	6.95e-06	Multiple_Complex
TC1300010037.hg.1	KIAA0226-like	KIAA0226L	5.5	7.75	5.29	0.19	0.88	T	T	4.71e-06	0.0004	Multiple_Complex
TC0200012598.hg.1		AC069157.1	5.49	6.86	4.4	0.68	0.79	T	T	0.0004	0.0134	Multiple_Complex
TC0100014958.hg.1	breast cancer anti-estrogen resistance 3	BCAR3	5.49	8.22	5.76	0.63	0.44	T	T	2.28e-07	3.05e-05	Multiple_Complex
TC0900010910.hg.1	solute carrier family 35 (UDP-GlcNAc/UDP-glucose transporter), member D2	SLC35D2	5.47	11.57	9.12	0.5	0.54	T	T	6.55e-07	7.46e-05	Multiple_Complex
TC0100015483.hg.1	notch 2	NOTCH2	5.42	12.65	10.21	0.26	0.35	T	T	3.05e-08	5.51e-06	Multiple_Complex
TC0700013603.hg.1	RAS p21 protein activator 4	RASA4	5.41	8	5.57	0.46	0.49	T	T	1.22e-06	0.0001	Multiple_Complex
TC1400008014.hg.1	Ras and Rab interactor 3	RIN3	5.4	6.34	3.91	0.77	0.65	T	F	1.23e-06	0.0001	Multiple_Complex
TC0100016625.hg.1	glutamate-ammonia ligase	GLUL	5.37	16.87	14.45	0.44	0.7	T	T	2.96e-06	0.0003	Multiple_Complex
TC1200009852.hg.1	pregnancy-zone protein	PZP	5.36	6.79	4.37	0.65	0.29	T	F	3.49e-06	0.0003	Multiple_Complex
TC0400011978.hg.1	TBC1 domain family, member 9 (with GRAM domain)	TBC1D9	5.35	6.7	4.28	0.53	0.42	T	F	1.27e-08	2.67e-06	Multiple_Complex
TC0X00007149.hg.1	TIMP metallopeptidase inhibitor 1	TIMP1	5.32	14.96	12.54	0.54	0.54	T	T	0.0003	0.0108	Multiple_Complex
TC0100016171.hg.1	myelin protein zero	MPZ	5.32	7.68	5.27	1.12	0.38	T	T	8.47e-06	0.0006	Multiple_Complex
TC0700010989.hg.1	tensin 3	TNS3	5.32	11.42	9.01	0.23	0.38	T	T	1.41e-05	0.0009	Multiple_Complex
TC0300013471.hg.1	B-cell CLL/lymphoma 6	BCL6	5.32	11.9	9.49	1.61	0.64	T	T	0.0023	0.0533	Multiple_Complex
TC0X00006477.hg.1	CD99 molecule	CD99	5.31	13.87	11.46	0.1	0.19	T	T	1.83e-05	0.0012	Multiple_Complex
TC0100018285.hg.1	neuroblastoma breakpoint family, member 19	NBPF19	5.29	10.95	8.55	0.42	0.82	T	T	3.95e-07	4.89e-05	Coding
TC0600012875.hg.1	FYN proto-oncogene, Src family tyrosine kinase	FYN	5.29	14.27	11.87	0.24	0.49	T	T	4.09e-06	0.0003	Multiple_Complex
TC1700007865.hg.1	2,3-cyclic nucleotide 3 phosphodiesterase	CNP	5.29	11.06	8.66	0.9	0.17	T	T	4.99e-05	0.0027	Multiple_Complex
TC1800008285.hg.1	Niemann-Pick disease, type C1	NPC1	5.27	13.98	11.58	0.06	0.34	T	T	3.1e-08	5.57e-06	Multiple_Complex
TC0300007055.hg.1	CTD small phosphatase like	CTDSPL	5.26	15.28	12.89	0.4	0.55	T	T	5.63e-07	6.63e-05	Multiple_Complex
TC0500013184.hg.1	glucuronidase, beta pseudogene	SMA4	5.24	14.72	12.33	0.37	0.2	T	T	7.03e-07	7.96e-05	Multiple_Complex
TC1100007293.hg.1	low density lipoprotein receptor class A domain containing 3	LDLRAD3	5.2	12.29	9.91	0.21	0.46	T	T	1.2e-08	2.54e-06	Multiple_Complex
TC1700012457.hg.1	axin 2	AXIN2	5.18	9.59	7.21	0.59	0.13	T	T	1.11e-06	0.0001	Multiple_Complex
TC1200008790.hg.1	ubiquitin specific peptidase 30	USP30	5.18	12.53	10.16	0.5	0.2	T	T	8.63e-08	1.34e-05	Multiple_Complex
TC0300011936.hg.1	CD47 molecule	CD47	5.18	12.75	10.38	0.16	0.28	T	T	1.04e-05	0.0007	Multiple_Complex
TC0600009498.hg.1	EYA transcriptional coactivator and phosphatase 4	EYA4	5.17	6.53	4.16	1.33	0.49	T	F	0.0014	0.0367	Multiple_Complex
TC2100008477.hg.1	S100 calcium binding protein B	S100B	5.15	6.52	4.16	0.82	0.22	T	T	8.55e-05	0.0041	Coding
TC0X00010982.hg.1	cerebellar degeneration related protein 1	CDR1	5.15	14.41	12.04	0.19	0.75	T	T	0.0002	0.0066	Coding
TC0X00010532.hg.1	angiomotin; microRNA 4329	AMOT; MIR4329	5.13	9.32	6.96	0.37	0.46	T	T	8.03e-05	0.0039	Multiple_Complex
TC1100009279.hg.1	out at first homolog	OAF	5.12	8.38	6.03	0.65	0.25	T	T	0.0001	0.0048	Coding
TC0X00010516.hg.1	doublecortin	DCX	5.12	9.95	7.59	1.28	0.64	T	T	0.0247	0.2508	Multiple_Complex
TC1900011861.hg.1	sphingosine-1-phosphate receptor 2	S1PR2	5.11	8.19	5.83	0.23	0.52	T	T	9.75e-08	1.49e-05	Multiple_Complex
TC0X00007363.hg.1	MAGE family member D2	MAGED2	5.1	14.19	11.84	0.18	0.19	T	T	4e-10	1.4e-07	Multiple_Complex
TC2000008801.hg.1		RP5-854E16.2	5.09	9.01	6.66	0.43	0.41	T	T	3.1e-08	5.57e-06	Multiple_Complex
TC0100009938.hg.1	myeloid/lymphoid or mixed-lineage leukemia; translocated to, 11	MLLT11	5.09	15.9	13.55	0.2	0.18	T	T	1.9e-08	3.67e-06	Multiple_Complex
TC2100007474.hg.1	protein arginine methyltransferase 2	PRMT2	5.09	11.41	9.06	0.22	0.67	T	T	1.15e-07	1.72e-05	Multiple_Complex
TC1100006879.hg.1	parvin, alpha	PARVA	5.09	13.56	11.22	0.47	0.04	T	T	4.84e-06	0.0004	Multiple_Complex
TC1900009204.hg.1	MOB kinase activator 3A	MOB3A	5.08	9.44	7.1	0.61	0.48	T	T	5.01e-05	0.0027	Multiple_Complex
TC2200008356.hg.1	tetratricopeptide repeat domain 28	TTC28	5.07	11.22	8.88	0.36	0.51	T	T	4.97e-07	5.94e-05	Multiple_Complex
TC1700009731.hg.1	growth arrest-specific 7	GAS7	5.07	8.4	6.05	0.51	0.11	T	T	2.68e-06	0.0002	Multiple_Complex
TC1700012466.hg.1	long intergenic non-protein coding RNA 673; long intergenic non-protein coding RNA 511	LINC00673; LINC00511	5.05	7.82	5.48	0.41	0.25	T	T	6.9e-06	0.0005	Multiple_Complex
TC0X00008862.hg.1	FUN14 domain containing 2	FUNDC2	5.04	13.84	11.51	0.21	0.45	T	T	1.35e-07	1.96e-05	Multiple_Complex
TC0200008534.hg.1	ankyrin repeat domain 36	ANKRD36	5.03	11.45	9.12	0.68	0.76	T	T	0.0061	0.1046	Multiple_Complex
TC1800007986.hg.1	laminin, alpha 1	LAMA1	5.01	14.38	12.06	0.53	0.28	T	T	3.5e-08	6.21e-06	Multiple_Complex
TC1200007535.hg.1	calcium channel, voltage-dependent, beta 3 subunit	CACNB3	5	10.87	8.55	0.23	0.53	T	T	1.2e-08	2.54e-06	Multiple_Complex
TC1800008628.hg.1	zinc finger and BTB domain containing 7C	ZBTB7C	4.98	7.81	5.5	0.69	0.46	T	T	3.97e-06	0.0003	Multiple_Complex
TC0300008332.hg.1	transgelin 3	TAGLN3	4.96	7.48	5.17	0.19	0.27	T	T	3.58e-06	0.0003	Coding
TC1600011375.hg.1	quinolinate phosphoribosyltransferase	QPRT	4.95	12.62	10.32	0.2	0.63	T	T	4.59e-05	0.0025	Multiple_Complex
TC1200012016.hg.1	T-box 3	TBX3	4.94	6.22	3.92	1.12	0.37	T	F	0.005	0.0911	Multiple_Complex
TC0300013932.hg.1	SLIT-ROBO Rho GTPase activating protein 3	SRGAP3	4.93	8.08	5.78	0.22	0.34	T	T	3.82e-06	0.0003	Multiple_Complex
TC1400009151.hg.1	tripartite motif containing 9	TRIM9	4.92	7.04	4.74	0.77	0.75	T	T	0.0001	0.0054	Multiple_Complex
TC1700007858.hg.1	FK506 binding protein 10	FKBP10	4.9	14.27	11.98	0.25	0.19	T	T	2.36e-08	4.4e-06	Multiple_Complex
TC1600008899.hg.1	zinc finger protein 276	ZNF276	4.9	6.58	4.29	0.39	0.17	T	T	3.69e-07	4.62e-05	Multiple_Complex
TC1100012219.hg.1	solute carrier family 35, member F2	SLC35F2	4.89	13.77	11.48	0.39	0.48	T	T	5.67e-08	9.45e-06	Multiple_Complex
TC0300011455.hg.1	FERM domain containing 4B	FRMD4B	4.87	11.01	8.73	0.74	0.44	T	T	0.001	0.0276	Multiple_Complex
TC1100012722.hg.1	cell adhesion associated, oncogene regulated	CDON	4.85	12.67	10.39	1.15	0.54	T	T	0.0002	0.0075	Multiple_Complex
TC1000011445.hg.1	myoferlin	MYOF	4.84	8.66	6.38	0.17	0.17	T	T	0.0019	0.0463	Multiple_Complex
TC0700012041.hg.1	procollagen-lysine, 2-oxoglutarate 5-dioxygenase 3	PLOD3	4.84	9.26	6.99	0.24	0.23	T	T	1.12e-07	1.68e-05	Multiple_Complex
TC0100013437.hg.1	AT hook, DNA binding motif, containing 1	AHDC1	4.81	8.46	6.19	0.54	0.4	T	T	0.0001	0.0047	Multiple_Complex
TC0700006813.hg.1	histone deacetylase 9	HDAC9	4.8	10.07	7.81	0.72	0.27	T	T	0.0001	0.006	Multiple_Complex
TC1100011643.hg.1	arrestin, beta 1	ARRB1	4.8	12.38	10.12	0.12	0.43	T	T	2.42e-07	3.21e-05	Multiple_Complex
TC0700008367.hg.1	paternally expressed 10	PEG10	4.79	10.87	8.61	0.58	0.69	T	T	1.99e-05	0.0013	Multiple_Complex
TC1000006754.hg.1	CUGBP, Elav-like family member 2	CELF2	4.79	12.8	10.54	0.41	0.32	T	T	1.35e-05	0.0009	Multiple_Complex
TC1100012445.hg.1	beta-site APP-cleaving enzyme 1	BACE1	4.79	8.38	6.12	0.38	0.11	T	T	5.8e-09	1.4e-06	Multiple_Complex
TC1200010023.hg.1	endoplasmic reticulum protein 27	ERP27	4.78	7.72	5.46	0.75	0.16	T	T	0.0013	0.0341	Multiple_Complex
TC2200009238.hg.1	crystallin beta B2 pseudogene 1	CRYBB2P1	4.78	11.29	9.03	0.33	0.44	T	T	6.17e-06	0.0005	Multiple_Complex
TC0X00007310.hg.1	TSPY-like 2	TSPYL2	4.78	13.68	11.42	0.29	0.07	T	T	3.37e-06	0.0003	Multiple_Complex
TC2000006721.hg.1	BTB (POZ) domain containing 3	BTBD3	4.76	14.89	12.63	0.14	0.37	T	T	3.97e-07	4.9e-05	Multiple_Complex
TC0600007635.hg.1	palmitoyl-protein thioesterase 2; EGF-like-domain, multiple 8; PPT2-EGFL8 readthrough (NMD candidate)	PPT2; EGFL8; PPT2-EGFL8	4.76	12.9	10.65	0.14	0.21	T	T	5.25e-09	1.28e-06	Multiple_Complex
TC1900011209.hg.1	leucine rich repeat containing 4B	LRRC4B	4.76	8.5	6.25	0.74	0.61	T	T	1.86e-08	3.62e-06	Coding
TC1700009954.hg.1	target of myb1 like 2 membrane trafficking protein	TOM1L2	4.75	8.67	6.42	0.42	0.41	T	T	0.0001	0.0048	Multiple_Complex
TC1100009412.hg.1	PBX/knotted 1 homeobox 2	PKNOX2	4.73	7.99	5.75	0.57	0.99	T	T	6.1e-05	0.0031	Multiple_Complex
TC0400012057.hg.1	solute carrier family 10, member 7	SLC10A7	4.73	8.89	6.65	0.39	0.5	T	T	4.77e-06	0.0004	Multiple_Complex
TC0800012301.hg.1	family with sequence similarity 110, member B	FAM110B	4.73	9.49	7.25	0.84	0.09	T	T	5.58e-06	0.0004	Multiple_Complex
TC0900011829.hg.1	ral guanine nucleotide dissociation stimulator	RALGDS	4.71	9.56	7.32	0.05	0.03	T	T	4.05e-08	7.03e-06	Multiple_Complex
TC1700012231.hg.1	transmembrane protein 98	TMEM98	4.71	12.38	10.14	0.11	0.81	T	T	0.0003	0.0101	Multiple_Complex
TC0300011754.hg.1	protein S (beta) pseudogene	PROS2P	4.71	6.66	4.43	0.75	0.62	T	T	0.0044	0.0828	Multiple_Complex
TC0100015561.hg.1	neuroblastoma breakpoint family, member 15	NBPF15	4.7	11.19	8.95	0.62	0.92	T	T	2.53e-07	3.33e-05	Multiple_Complex
TC1600007819.hg.1	naked cuticle homolog 1 (Drosophila)	NKD1	4.69	8.15	5.92	0.56	0.18	T	T	0.0023	0.0526	Multiple_Complex
TC0400012796.hg.1	platelet-derived growth factor receptor, alpha polypeptide	PDGFRA	4.69	8.75	6.52	1.34	0.44	T	T	0.0011	0.0309	Multiple_Complex
TC1200011002.hg.1	leucine-rich repeats and immunoglobulin-like domains 3	LRIG3	4.65	10.65	8.43	0.62	0.23	T	T	5.25e-05	0.0028	Multiple_Complex
TC1400009141.hg.1	ninein (GSK3B interacting protein)	NIN	4.64	10.59	8.38	1.01	0.78	T	T	0.0135	0.1745	Multiple_Complex
TC0700013615.hg.1	zinc finger protein 800	ZNF800	4.63	10.78	8.57	1.02	0.27	T	T	0.0015	0.0394	Multiple_Complex
TC1500008370.hg.1	ST8 alpha-N-acetyl-neuraminide alpha-2,8-sialyltransferase 2	ST8SIA2	4.63	7.82	5.61	0.71	0.52	T	T	2.76e-05	0.0016	Multiple_Complex
TC1700008254.hg.1	acyl-CoA synthetase family member 2	ACSF2	4.62	9.17	6.96	0.22	0.46	T	T	4.08e-08	7.08e-06	Multiple_Complex
TC0100007705.hg.1	antizyme inhibitor 2	AZIN2	4.61	6.78	4.57	0.61	0.28	T	T	5.04e-08	8.53e-06	Multiple_Complex
TC0900008851.hg.1	dynamin 1	DNM1	4.55	13.24	11.06	0.2	0.14	T	T	1.07e-06	0.0001	Multiple_Complex
TC1500010233.hg.1	mex-3 RNA binding family member B	MEX3B	4.54	10.15	7.97	0.51	0.17	T	T	1.14e-05	0.0008	Coding
TC0600011173.hg.1	glucuronidase, beta pseudogene 2	GUSBP2	4.53	15.77	13.59	0.12	0.4	T	T	3.26e-08	5.81e-06	Multiple_Complex
TC1700011121.hg.1	transducer of ERBB2, 1	TOB1	4.53	14.54	12.37	0.44	0.54	T	T	3.83e-07	4.76e-05	Multiple_Complex
TC0200016679.hg.1	SERTA domain containing 2	SERTAD2	4.53	7.62	5.44	0.22	0.21	T	T	4.7e-08	8.04e-06	Multiple_Complex
TC0200006569.hg.1	SRY box 11	SOX11	4.51	10.66	8.48	0.06	0.18	T	T	4.6e-05	0.0025	Multiple_Complex
TC1700008418.hg.1	dynein, light chain, LC8-type 2	DYNLL2	4.51	13.97	11.8	0.59	0.32	T	T	1.54e-05	0.001	Multiple_Complex
TC1500007841.hg.1	coiled-coil domain containing 33	CCDC33	4.51	9.33	7.16	0.44	0.29	T	T	8.11e-07	8.97e-05	Multiple_Complex
TC0200006583.hg.1	ring finger protein 144A	RNF144A	4.5	9.46	7.29	0.84	0.71	T	T	0.0001	0.0056	Multiple_Complex
TC0100015102.hg.1	collagen, type XI, alpha 1	COL11A1	4.5	10.2	8.03	0.39	0.76	T	T	0.0005	0.0161	Multiple_Complex
TC0Y00006476.hg.1	Homo sapiens CD99 molecule (CD99), transcript variant 2, mRNA.; Homo sapiens CD99 molecule (CD99), transcript variant 3, mRNA.; Homo sapiens CD99 molecule (CD99), transcript variant 1, mRNA.; CD99 molecule [Source:HGNC Symbol;Acc:HGNC:7082]; Homo sapiens CD99 molecule, mRNA (cDNA clone MGC:2282 IMAGE:3161673), complete cds.; Homo sapiens CD99 molecule, mRNA (cDNA clone MGC:3938 IMAGE:2906143), co…	CD99	4.48	13.46	11.29	0.14	0.16	T	T	4.06e-05	0.0023	Multiple_Complex
TC1200010713.hg.1	fidgetin-like 2	FIGNL2	4.48	6.78	4.62	0.49	0.53	T	T	6.66e-07	7.59e-05	Multiple_Complex
TC0X00007951.hg.1	armadillo repeat containing, X-linked 3	ARMCX3	4.47	7.92	5.76	0.86	0.92	T	T	0.004	0.0781	Multiple_Complex
TC0600009597.hg.1	tumor necrosis factor, alpha-induced protein 3	TNFAIP3	4.46	9.76	7.61	0.67	0.21	T	T	6.32e-06	0.0005	Multiple_Complex
TC1700006547.hg.1	small G protein signaling modulator 2	SGSM2	4.46	9.39	7.23	0.37	0.44	T	T	1.1e-05	0.0008	Multiple_Complex
TC1000012516.hg.1	aldo-keto reductase family 1, member C2	AKR1C2	4.45	8.4	6.25	0.29	0.99	T	T	2.14e-06	0.0002	Multiple_Complex
TC0100009760.hg.1	nudix hydrolase 4 pseudogene 1; nudix hydrolase 4 pseudogene 2; nudix hydrolase 4	NUDT4P1; NUDT4P2; NUDT4	4.44	16.94	14.79	0.36	0.27	T	T	1.11e-06	0.0001	Multiple_Complex
TC0100009833.hg.1	nudix hydrolase 4; nudix hydrolase 4 pseudogene 1	NUDT4; NUDT4P1	4.44	16.94	14.79	0.36	0.27	T	T	1.11e-06	0.0001	Multiple_Complex
TC0500010835.hg.1	polo-like kinase 2	PLK2	4.44	12.01	9.86	0.89	0.91	T	T	0.0018	0.0436	Multiple_Complex
TC2000007386.hg.1	phospholipase C, gamma 1; ribosomal protein L23a pseudogene 81	PLCG1; RPL23AP81	4.44	12.63	10.48	0.34	0.26	T	T	1.26e-06	0.0001	Multiple_Complex
TC1500007238.hg.1	tropomodulin 2 (neuronal)	TMOD2	4.43	8.52	6.38	1.5	0.34	T	T	0.026	0.2581	Multiple_Complex
TC1500010886.hg.1	calmodulin-like 4	CALML4	4.43	12.63	10.48	0.09	0.38	T	T	9.64e-07	0.0001	Multiple_Complex
TC0100013854.hg.1	sex comb on midleg homolog 1 (Drosophila)	SCMH1	4.43	10.07	7.92	0.4	0.47	T	T	1.01e-05	0.0007	Multiple_Complex
TC0100015680.hg.1	neuroblastoma breakpoint family, member 9	NBPF9	4.4	10.51	8.37	0.87	0.66	T	T	2.29e-05	0.0014	Multiple_Complex
TC0100007954.hg.1	small ArfGAP2	SMAP2	4.39	10.64	8.5	0.52	0.63	T	T	1.01e-06	0.0001	Multiple_Complex
TC0900012227.hg.1	F-box protein 10	FBXO10	4.38	10.52	8.38	0.16	0.26	T	T	4.46e-07	5.41e-05	Multiple_Complex
TC0100018507.hg.1	Rho/Rac guanine nucleotide exchange factor 2	ARHGEF2	4.38	12.5	10.37	0.51	0.04	T	T	3.35e-06	0.0003	Multiple_Complex
TC2000009932.hg.1	small nucleolar RNA, C/D box 12C; small nucleolar RNA, C/D box 12; ZNFX1 antisense RNA 1; small nucleolar RNA, C/D box 12B	SNORD12C; SNORD12; ZFAS1; SNORD12B	4.38	15.72	13.59	0.1	0.12	T	T	1.65e-08	3.29e-06	Multiple_Complex
TC1200010038.hg.1	epidermal growth factor receptor pathway substrate 8	EPS8	4.38	9.39	7.26	0.56	0.42	T	T	1.25e-05	0.0009	Multiple_Complex
TC1900010855.hg.1	cell adhesion molecule 4	CADM4	4.37	8.83	6.71	0.23	0.41	T	T	4.19e-05	0.0023	Multiple_Complex
TC0300011757.hg.1	protein S (alpha)	PROS1	4.37	6.93	4.8	0.23	0.42	T	T	1.18e-05	0.0008	Multiple_Complex
TC1200008466.hg.1	nudix hydrolase 4	NUDT4	4.36	16.7	14.58	0.41	0.28	T	T	1.86e-07	2.58e-05	Multiple_Complex
TC0X00009205.hg.1	SH3-domain kinase binding protein 1	SH3KBP1	4.36	11.8	9.68	0.1	0.19	T	T	3.59e-05	0.0021	Multiple_Complex
TC1100008139.hg.1	aryl hydrocarbon receptor interacting protein	AIP	4.35	10.46	8.34	0.8	0.35	T	T	1.26e-06	0.0001	Multiple_Complex
TC0500013185.hg.1		RP11-497H16.7	4.35	9.46	7.34	0.86	0.48	T	T	2.22e-06	0.0002	Multiple_Complex
TC1200007690.hg.1	tensin 2	TNS2	4.34	6.02	3.91	0.29	0.51	T	F	4.28e-05	0.0024	Multiple_Complex
TC0900010553.hg.1	SPATA31 subfamily B, member 1, pseudogene	SPATA31B1P	4.33	7.15	5.03	0.23	0.37	T	T	2.34e-07	3.12e-05	Multiple_Complex
TC0100017145.hg.1	plexin A2	PLXNA2	4.32	7.08	4.97	0.24	0.15	T	T	3.08e-07	3.95e-05	Multiple_Complex
TC0500007000.hg.1	long intergenic non-protein coding RNA 1021	LINC01021	4.32	14.19	12.08	0.57	0.86	T	T	0.0148	0.1853	Multiple_Complex
TC0500013318.hg.1	Homo sapiens glucuronidase, beta pseudogene 3 (GUSBP3), non-coding RNA.; Salzman2013 ANNOTATED, INTERNAL, ncRNA, OVEXON best transcript NR_029426; Salzman2013 ANNOTATED, ncRNA, OVEXON best transcript NR_029426	GUSBP3; SMA4	4.31	15.11	13	0.15	0.35	T	T	8.49e-08	1.32e-05	Multiple_Complex
TC0100010299.hg.1	nescient helix-loop-helix 1	NHLH1	4.31	6.95	4.84	1.38	0.1	T	T	0.0021	0.0494	Coding
TC0100011197.hg.1	shisa family member 4	SHISA4	4.31	7.03	4.92	0.32	0.45	T	T	2.14e-05	0.0013	Multiple_Complex
TC0900011379.hg.1	multiple EGF-like-domains 9	MEGF9	4.29	6.8	4.7	0.39	0.25	T	T	2.24e-06	0.0002	Multiple_Complex
TC1100010639.hg.1	tumor protein p53 inducible protein 11	TP53I11	4.29	14.31	12.21	0.35	0.58	T	T	0.0001	0.0059	Multiple_Complex
TC0500013299.hg.1	TEC	RP11-1250I15.1	4.28	15.05	12.95	0.17	0.24	T	T	1.62e-08	3.26e-06	Multiple_Complex
TC1100013131.hg.1	insulin-like growth factor 2	IGF2	4.28	7.67	5.57	1.37	0.13	T	T	0.0007	0.0215	Multiple_Complex
TC1200012575.hg.1	dual specificity tyrosine-(Y)-phosphorylation regulated kinase 4	DYRK4	4.27	9.29	7.19	0.28	0.5	T	T	3.43e-06	0.0003	Multiple_Complex
TC1700010254.hg.1	slingshot protein phosphatase 2	SSH2	4.27	12.16	10.07	0.3	0.86	T	T	1.24e-06	0.0001	Multiple_Complex
TC0100016631.hg.1	regulator of G-protein signaling 16	RGS16	4.25	9.14	7.06	0.37	0.19	T	T	0.0001	0.005	Coding
TC2200008446.hg.1	galactose-3-O-sulfotransferase 1	GAL3ST1	4.25	9.73	7.65	0.7	0.36	T	T	0.001	0.0286	Multiple_Complex
TC1100010688.hg.1	PHD finger protein 21A	PHF21A	4.24	13.57	11.49	0.32	0.58	T	T	3e-07	3.87e-05	Multiple_Complex
TC1100008038.hg.1	sorting nexin 32	SNX32	4.24	8.1	6.01	0.29	0.36	T	T	1.7e-06	0.0002	Multiple_Complex
TC2200007620.hg.1	fibulin 1	FBLN1	4.23	13.17	11.09	0.07	0.38	T	T	2.1e-05	0.0013	Multiple_Complex
TC0700008517.hg.1	zinc finger with KRAB and SCAN domains 1	ZKSCAN1	4.22	13.05	10.97	0.29	0.99	T	T	0.0007	0.0219	Multiple_Complex
TC1100012469.hg.1	sodium channel, voltage gated, type IV beta subunit	SCN4B	4.22	7.36	5.28	1.44	0.13	T	T	0.0005	0.0169	Multiple_Complex
TC1100012708.hg.1	fasciculation and elongation protein zeta 1	FEZ1	4.21	11.84	9.77	0.57	0.26	T	T	0.0008	0.023	Multiple_Complex
TC0600008972.hg.1	PR domain containing 1, with ZNF domain	PRDM1	4.19	7.31	5.24	0.15	0.41	T	F	0.0122	0.1646	Multiple_Complex
TC1400007478.hg.1	gephyrin	GPHN	4.19	12.2	10.13	0.36	0.33	T	T	1.49e-06	0.0001	Multiple_Complex
TC0900010878.hg.1	Fanconi anemia complementation group C	FANCC	4.19	9.56	7.49	0.3	0.72	T	T	3.2e-06	0.0003	Multiple_Complex
TC0100007789.hg.1	argonaute RISC catalytic component 3	AGO3	4.18	12.77	10.7	0.09	0.45	T	T	5.95e-05	0.0031	Multiple_Complex
TC1500006645.hg.1	gamma-aminobutyric acid (GABA) A receptor, gamma 3	GABRG3	4.17	6.57	4.52	0.5	0.22	T	T	1.64e-05	0.0011	Multiple_Complex
TC0X00009869.hg.1	Cdc42 guanine nucleotide exchange factor 9; ARHGEF9 intronic transcript 1	ARHGEF9; ARHGEF9-IT1	4.16	15.12	13.06	0.27	0.96	T	T	2.29e-05	0.0014	Multiple_Complex
TC2000008198.hg.1	carboxypeptidase X (M14 family), member 1	CPXM1	4.16	12.12	10.07	0.2	0.47	T	T	8.48e-07	9.28e-05	Multiple_Complex
TC0100015784.hg.1	selenium binding protein 1	SELENBP1	4.16	8.33	6.27	0.26	0.27	T	T	7.62e-05	0.0038	Multiple_Complex
TC0700008465.hg.1	neuronal pentraxin II	NPTX2	4.15	8.57	6.51	1.11	0.52	T	T	0.0006	0.0196	Multiple_Complex
TC0900008474.hg.1	sorting nexin family member 30	SNX30	4.15	10.27	8.22	0.23	0.22	T	T	6e-07	6.98e-05	Multiple_Complex
TC0200006799.hg.1	v-myc avian myelocytomatosis viral oncogene neuroblastoma derived homolog	MYCN	4.15	13.47	11.41	0.68	0.38	T	T	1.26e-06	0.0001	Coding
TC0100012089.hg.1	G protein-coupled receptor 137B	GPR137B	4.15	11.42	9.36	0.18	0.47	T	T	3.26e-08	5.81e-06	Multiple_Complex
TC0800010695.hg.1	small nucleolar RNA, C/D box 87; small nucleolar RNA host gene 6	SNORD87; SNHG6	4.15	15.03	12.98	0.21	0.32	T	T	2.32e-08	4.34e-06	Multiple_Complex
TC0300007367.hg.1	kelch domain containing 8B	KLHDC8B	4.13	7.79	5.75	0.67	0.16	T	T	1.75e-06	0.0002	Multiple_Complex
TC0X00008108.hg.1	transmembrane protein 164	TMEM164	4.13	9.66	7.61	0.31	0.32	T	T	3.84e-07	4.78e-05	Multiple_Complex
TC0100009641.hg.1	neuroblastoma breakpoint family, member 8	NBPF8	4.11	8.56	6.52	1.2	0.33	T	T	0.0003	0.0106	Multiple_Complex
TC0100015271.hg.1	oviductal glycoprotein 1	OVGP1	4.11	7.24	5.2	1.06	0.3	T	T	0.0015	0.039	Multiple_Complex
TC0X00007557.hg.1	mediator complex subunit 12	MED12	4.09	12.89	10.86	0.04	0.19	T	T	4.45e-07	5.4e-05	Multiple_Complex
TC1200010881.hg.1	premelanosome protein	PMEL	4.09	10.95	8.92	2.03	0.34	T	T	0.0464	0.3519	Multiple_Complex
TC0600008006.hg.1	forkhead box P4; microRNA 4641	FOXP4; MIR4641	4.08	8.21	6.18	0.76	0.33	T	T	0.0061	0.1042	Multiple_Complex
TC1700012362.hg.1	tripartite motif containing 16	TRIM16	4.08	11.12	9.09	0.15	0.69	T	T	1.24e-07	1.83e-05	Multiple_Complex
TC1000011726.hg.1	SH3 and PX domains 2A	SH3PXD2A	4.07	8.94	6.91	0.68	0.11	T	T	3.83e-05	0.0022	Multiple_Complex
TC0100016664.hg.1	collagen beta(1-O)galactosyltransferase 2	COLGALT2	4.06	8.84	6.82	0.64	0.23	T	T	8.58e-06	0.0006	Multiple_Complex
TC1400010261.hg.1	MOK protein kinase	MOK	4.06	6.26	4.24	0.61	0.19	T	F	5.94e-08	9.77e-06	Multiple_Complex
TC0300007606.hg.1	abhydrolase domain containing 6	ABHD6	4.05	9.93	7.92	0.34	0.45	T	T	0.0006	0.0188	Multiple_Complex
TC0900006993.hg.1	annexin A2 pseudogene 2	ANXA2P2	4.04	14.75	12.73	0.72	0.21	T	T	0.0022	0.0505	Multiple_Complex
TC0300013995.hg.1	musculoskeletal, embryonic nuclear protein 1	MUSTN1	4.04	5.9	3.88	0.84	0.2	T	T	0.0027	0.0588	Coding
TC1500008986.hg.1	lysophosphatidylcholine acyltransferase 4	LPCAT4	4.03	12.25	10.24	0.34	0.46	T	T	2.46e-05	0.0015	Multiple_Complex
TC0400012945.hg.1	hydroxysteroid (17-beta) dehydrogenase 11	HSD17B11	4.02	13.44	11.44	0.53	0.36	T	T	0.0004	0.0149	Multiple_Complex
TC2100008555.hg.1	T-cell lymphoma invasion and metastasis 1	TIAM1	4.02	10.81	8.8	0.24	0.76	T	T	1.35e-07	1.95e-05	Multiple_Complex
TC1100013043.hg.1	family with sequence similarity 89, member B	FAM89B	4.02	9.61	7.6	0.57	0.66	T	T	8.26e-05	0.004	Coding
TC0700011151.hg.1	FK506 binding protein 9 pseudogene 1	FKBP9P1	4.02	9.07	7.06	0.71	0.53	T	T	3.22e-05	0.0019	Multiple_Complex
TC0600010802.hg.1	ELOVL fatty acid elongase 2	ELOVL2	4.02	8.23	6.22	0.84	0.65	T	T	8.52e-05	0.0041	Multiple_Complex
TC0100011485.hg.1	REST corepressor 3	RCOR3	4.01	9.05	7.05	0.6	0.58	T	T	0.0005	0.0176	Multiple_Complex
TC1900007386.hg.1	single stranded DNA binding protein 4	SSBP4	4.01	7.8	5.79	0.22	0.5	T	T	7.09e-06	0.0005	Multiple_Complex
TC0400008972.hg.1	doublecortin-like kinase 2	DCLK2	4.01	8.43	6.42	0.75	0.14	T	T	0.0044	0.0828	Multiple_Complex
TC1200012273.hg.1	Rab interacting lysosomal protein-like 1	RILPL1	4.01	8.09	6.09	0.19	0.21	T	T	6.19e-07	7.14e-05	Multiple_Complex
TC0300013255.hg.1	zinc finger, matrin-type 3	ZMAT3	4.01	10.16	8.16	0.94	0.71	T	T	0.0117	0.1598	Multiple_Complex
TC0700008171.hg.1	MAGI2 antisense RNA 3	MAGI2-AS3	4	10.33	8.33	0.58	0.89	T	T	0.0006	0.0192	Multiple_Complex
TC0100018500.hg.1	glucosidase, beta, acid pseudogene 1	GBAP1	3.99	9.37	7.37	0.47	0.64	T	T	2.6e-05	0.0016	Multiple_Complex
TC1200010277.hg.1	Synthetic construct Homo sapiens clone IMAGE:100069208, MGC:199219 OVOS2 protein (OVOS2) mRNA, encodes complete protein.	OVOS2	3.97	8.16	6.17	0.22	0.64	T	T	0.0022	0.0505	Multiple_Complex
TC0500011049.hg.1	NLR family, apoptosis inhibitory protein	NAIP	3.97	8.44	6.45	1.21	0.53	T	T	0.0001	0.0055	Multiple_Complex
TC0600011697.hg.1	coiled-coil domain containing 167	CCDC167	3.97	8.76	6.77	0.56	0.24	T	T	0.0003	0.0105	Coding
TC0100009897.hg.1	carbonic anhydrase XIV	CA14	3.96	12.12	10.13	0.5	0.33	T	T	0.0004	0.0146	Multiple_Complex
TC1900011132.hg.1	solute carrier family 6, member 16	SLC6A16	3.96	8.05	6.06	0.31	0.23	T	T	8.99e-06	0.0007	Multiple_Complex
TC2000006861.hg.1	Ras and Rab interactor 2	RIN2	3.95	9.23	7.25	0.51	0.26	T	T	9.29e-05	0.0044	Multiple_Complex
TC0200006725.hg.1	growth regulation by estrogen in breast cancer 1	GREB1	3.94	11.7	9.72	0.2	0.38	T	T	5.8e-06	0.0005	Multiple_Complex
TC0100017716.hg.1	family with sequence similarity 89, member A; microRNA 1182	FAM89A; MIR1182	3.93	5.96	3.99	0.63	0.37	T	T	8.11e-05	0.004	Multiple_Complex
TC0700007370.hg.1	AE binding protein 1; microRNA 4649	AEBP1; MIR4649	3.93	11.96	9.98	0.38	0.25	T	T	8.78e-06	0.0006	Multiple_Complex
TC0X00007937.hg.1	dystrophin related protein 2	DRP2	3.93	6.8	4.83	0.32	0.4	T	T	3.99e-06	0.0003	Multiple_Complex
TC0600014098.hg.1	alpha tubulin acetyltransferase 1	ATAT1	3.92	10.97	9	0.43	0.67	T	T	7.4e-07	8.31e-05	Multiple_Complex
TC0900009949.hg.1	tropomyosin 2 (beta)	TPM2	3.92	13.94	11.97	0.32	0.27	T	T	2.9e-06	0.0003	Multiple_Complex
TC0100017988.hg.1	fatty acid binding protein 7, brain pseudogene 1 [Source:HGNC Symbol;Acc:HGNC:41951]	FABP7P1	3.92	6.19	4.22	0.83	0.55	T	T	0.0006	0.0192	Multiple_Complex
TC0400012948.hg.1	endomucin	EMCN	3.92	7.51	5.54	0.95	0.04	T	T	0.0271	0.2641	Multiple_Complex
TC0300013852.hg.1	ST3 beta-galactoside alpha-2,3-sialyltransferase 6	ST3GAL6	3.92	11.39	9.42	0.34	0.48	T	T	6.41e-07	7.35e-05	Multiple_Complex
TC1500007529.hg.1	ubiquitin specific peptidase 3	USP3	3.92	13.12	11.15	0.34	0.3	T	T	8.68e-08	1.34e-05	Multiple_Complex
TC1000012427.hg.1	aldo-keto reductase family 1, member C1	AKR1C1	3.92	7.53	5.56	0.07	0.33	T	T	2.95e-05	0.0017	Multiple_Complex
TC1600007988.hg.1	copine II	CPNE2	3.91	11.3	9.33	0.43	0.93	T	T	0.002	0.0468	Multiple_Complex
TC1000006995.hg.1	COMMD3-BMI1 readthrough; BMI1 proto-oncogene, polycomb ring finger; COMM domain containing 3	COMMD3-BMI1; BMI1; COMMD3	3.9	7.01	5.05	0.31	0.5	T	T	1.78e-05	0.0011	Multiple_Complex
TC0600007788.hg.1	signal peptide, CUB domain, EGF-like 3	SCUBE3	3.88	7.17	5.22	0.33	0.55	T	T	4.25e-05	0.0024	Multiple_Complex
TC0X00008468.hg.1	coiled-coil domain containing 160	CCDC160	3.88	8.97	7.02	0.52	0.55	T	T	1.37e-05	0.0009	Multiple_Complex
TC0100018480.hg.1	neuroblastoma breakpoint family, member 14	NBPF14	3.87	11.92	9.97	0.52	0.2	T	T	3.41e-06	0.0003	Coding
TC0600007959.hg.1	dishevelled associated activator of morphogenesis 2	DAAM2	3.87	6.05	4.1	0.06	0.12	T	T	3.25e-06	0.0003	Multiple_Complex
TC1500007038.hg.1	StAR-related lipid transfer domain containing 9	STARD9	3.86	9.61	7.66	0.35	0.21	T	T	4.31e-05	0.0024	Multiple_Complex
TC2200007309.hg.1	SH3-domain binding protein 1; pyridoxal (pyridoxine, vitamin B6) phosphatase	SH3BP1; PDXP	3.86	12.07	10.12	0.48	0.54	T	T	3.75e-05	0.0021	Multiple_Complex
TC1200012653.hg.1	methyltransferase like 21B	METTL21B	3.85	9.52	7.58	0.24	0.39	T	T	4.04e-07	4.97e-05	Multiple_Complex
TC0900010637.hg.1	growth arrest-specific 1	GAS1	3.85	5.34	3.39	0.33	0.3	T	F	2.07e-05	0.0013	Coding
TC1200010928.hg.1	small nucleolar RNA, C/D box 59B	SNORD59B	3.84	10.88	8.94	0.96	0.35	T	T	0.0008	0.0242	Multiple_Complex
TC1500009429.hg.1	Dmx-like 2	DMXL2	3.84	10.89	8.95	0.42	0.7	T	T	0.0115	0.1586	Multiple_Complex
TC0100017072.hg.1	ELK4, ETS-domain protein (SRF accessory protein 1)	ELK4	3.84	15.56	13.62	0.44	0.5	T	T	0.0012	0.032	Multiple_Complex
TC0900011713.hg.1	formin binding protein 1	FNBP1	3.84	12.68	10.74	0.23	0.56	T	T	2.12e-07	2.87e-05	Multiple_Complex
TC0100013897.hg.1	prolyl 3-hydroxylase 1	P3H1	3.84	13.61	11.67	0.57	0.27	T	T	5.53e-06	0.0004	Multiple_Complex
TC1400008583.hg.1	cyclin B1 interacting protein 1, E3 ubiquitin protein ligase; small nucleolar RNA, C/D box 126	CCNB1IP1; SNORD126	3.83	16.52	14.58	0.17	0.15	T	T	1.17e-08	2.5e-06	Multiple_Complex
TC0400008892.hg.1	hedgehog interacting protein	HHIP	3.82	7.06	5.13	1.06	0.1	T	F	0.0221	0.2347	Multiple_Complex
TC0X00007368.hg.1	trophinin	TRO	3.8	14.62	12.69	0.11	0.26	T	T	4.19e-08	7.24e-06	Multiple_Complex
TC0500013248.hg.1	protocadherin beta 15	PCDHB15	3.79	9.35	7.43	0.4	0.25	T	T	5.11e-06	0.0004	Coding
TC0X00008836.hg.1	plexin A3	PLXNA3	3.78	8.08	6.16	0.38	0.46	T	T	1.44e-05	0.001	Multiple_Complex
TC1200007892.hg.1	Rho guanine nucleotide exchange factor 25	ARHGEF25	3.77	8.54	6.63	0.44	0.55	T	T	8.86e-08	1.37e-05	Multiple_Complex
TC0100011253.hg.1	BTG family, member 2	BTG2	3.76	8.88	6.96	0.57	0.38	T	T	0.0004	0.0135	Multiple_Complex
TC2200007138.hg.1	F-box protein 7	FBXO7	3.75	16.89	14.98	0.21	0.44	T	T	1.1e-06	0.0001	Multiple_Complex
TC1600010795.hg.1	small nucleolar RNA, C/D box 71	SNORD71	3.75	13.16	11.25	0.16	0.98	T	T	0.0015	0.0388	Multiple_Complex
TC0600011971.hg.1	patched domain containing 4	PTCHD4	3.75	6.14	4.23	0.06	0.07	T	T	0.0009	0.0271	Multiple_Complex
TC0X00011248.hg.1	trimethyllysine hydroxylase, epsilon	TMLHE	3.75	9.3	7.39	0.5	0.54	T	T	0.0001	0.0058	Multiple_Complex
TC0400010140.hg.1	zinc finger E-box binding homeobox 2 pseudogene 1	ZEB2P1	3.75	10.64	8.74	0.46	0.35	T	T	1.83e-05	0.0012	Multiple_Complex
TC1100008382.hg.1	Rho guanine nucleotide exchange factor 17	ARHGEF17	3.74	6.6	4.69	0.84	0.45	T	T	8.26e-06	0.0006	Multiple_Complex
TC0100018478.hg.1	neuroblastoma breakpoint family, member 10	NBPF10	3.74	11.63	9.72	0.46	0.4	T	T	1.57e-05	0.001	Multiple_Complex
TC1600011451.hg.1	transcription factor 25 (basic helix-loop-helix)	TCF25	3.74	10.98	9.08	0.3	0.33	T	T	4.54e-05	0.0025	Multiple_Complex
TC0X00008014.hg.1	transmembrane protein 31	TMEM31	3.74	9.13	7.23	0.79	0.54	T	T	1.34e-06	0.0001	Coding
TC0200015082.hg.1	FK506 binding protein 7	FKBP7	3.73	10.85	8.95	0.45	0.46	T	T	3.32e-06	0.0003	Multiple_Complex
TC1000012603.hg.1	family with sequence similarity 53, member B	FAM53B	3.73	10.34	8.44	0.07	0.09	T	T	2.12e-06	0.0002	Multiple_Complex
TC0100016431.hg.1	tumor necrosis factor (ligand) superfamily, member 4	TNFSF4	3.72	7.34	5.44	0.78	0.74	T	F	0.0006	0.0192	Multiple_Complex
TC0100009899.hg.1	chromosome 1 open reading frame 54	C1orf54	3.72	9.78	7.89	0.23	0.17	T	T	2.45e-07	3.24e-05	Multiple_Complex
TC0200012863.hg.1	sprouty-related, EVH1 domain containing 2	SPRED2	3.71	11.95	10.06	0.31	0.4	T	T	3.38e-05	0.0019	Multiple_Complex
TC1700007319.hg.1	WD repeat and SOCS box containing 1	WSB1	3.71	14.53	12.64	0.52	2.08	T	T	0.022	0.2342	Multiple_Complex
TC1200012617.hg.1	FYVE, RhoGEF and PH domain containing 4	FGD4	3.7	13.33	11.44	0.21	0.68	T	T	0.0002	0.0089	Multiple_Complex
TC0700013522.hg.1	twist family bHLH transcription factor 1	TWIST1	3.7	6.32	4.44	0.5	0.13	T	F	1.96e-05	0.0012	Multiple_Complex
TC0200015332.hg.1	post-GPI attachment to proteins 1	PGAP1	3.7	12.31	10.42	0.08	0.65	T	T	0.0032	0.0673	Multiple_Complex
TC0200010263.hg.1	inositol polyphosphate-1-phosphatase	INPP1	3.69	6.23	4.34	0.16	0.21	T	T	4.49e-06	0.0004	Multiple_Complex
TC1700008945.hg.1	sphingosine kinase 1	SPHK1	3.69	7.05	5.16	0.89	0.48	T	T	0.0007	0.0209	Multiple_Complex
TC1700011101.hg.1	chondroadherin	CHAD	3.69	6.02	4.14	0.66	0.04	T	T	0.0003	0.01	Coding
TC1700012371.hg.1	zinc finger protein 286B; forkhead box O3B pseudogene	ZNF286B; FOXO3B	3.68	11.94	10.06	0.5	0.36	T	T	1.28e-06	0.0001	Multiple_Complex
TC2000007219.hg.1	ERGIC and golgi 3	ERGIC3	3.67	15.32	13.45	0.31	0.08	T	T	1.23e-07	1.81e-05	Multiple_Complex
TC0600009772.hg.1	SAM and SH3 domain containing 1	SASH1	3.67	10.25	8.37	0.16	0.5	T	T	0.0124	0.1658	Multiple_Complex
TC0100013293.hg.1	inhibitor of DNA binding 3, dominant negative helix-loop-helix protein	ID3	3.65	13.82	11.95	0.65	0.8	T	T	0.0011	0.0309	Multiple_Complex
TC1800007927.hg.1	discs, large (Drosophila) homolog-associated protein 1	DLGAP1	3.65	8.78	6.92	0.21	0.09	T	T	0.0001	0.0064	Multiple_Complex
TC0800011826.hg.1	ArfGAP with SH3 domain, ankyrin repeat and PH domain 1; ASAP1 intronic transcript 2	ASAP1; ASAP1-IT2	3.65	13.67	11.81	0.5	0.36	T	T	2.48e-06	0.0002	Multiple_Complex
TC0100010609.hg.1	dynamin 3	DNM3	3.64	7.13	5.26	0.54	0.29	T	T	0.0019	0.0457	Multiple_Complex
TC1200010562.hg.1	collagen, type II, alpha 1	COL2A1	3.63	7.89	6.03	0.91	0.37	T	T	5.83e-05	0.003	Multiple_Complex
TC1300008497.hg.1	ubiquitin-like 3	UBL3	3.62	13.47	11.61	0.58	0.54	T	T	0.0034	0.0694	Multiple_Complex
TC1700011237.hg.1	vascular endothelial zinc finger 1	VEZF1	3.62	14.19	12.34	0.12	0.35	T	T	5.88e-07	6.87e-05	Multiple_Complex
TC0200011837.hg.1	family with sequence similarity 49, member A	FAM49A	3.61	10.7	8.85	1.16	0.4	T	T	0.0055	0.0975	Multiple_Complex
TC2200007037.hg.1	myotubularin related protein 3	MTMR3	3.61	10.74	8.89	0.13	0.54	T	T	2.07e-06	0.0002	Multiple_Complex
TC0700010697.hg.1	retinitis pigmentosa 9 (autosomal dominant)	RP9	3.6	9.97	8.12	0.58	0.16	T	T	1.73e-05	0.0011	Multiple_Complex
TC2000009646.hg.1	cathepsin Z	CTSZ	3.6	10.29	8.44	1.4	0.04	T	T	0.011	0.1542	Multiple_Complex
TC0800012351.hg.1	WDYHV motif containing 1	WDYHV1	3.59	12.05	10.2	0.42	0.38	T	T	5.75e-06	0.0004	Multiple_Complex
TC0100010186.hg.1	Uncharacterized protein [Source:UniProtKB/TrEMBL;Acc:A0A096LPE9]	AL365181.2	3.59	8.35	6.5	0.08	0.26	T	T	0.0002	0.0085	Coding
TC1200012791.hg.1	formin like 3	FMNL3	3.59	6.79	4.95	0.34	0.25	T	T	1.34e-06	0.0001	Multiple_Complex
TC1000011418.hg.1	fibroblast growth factor binding protein 3	FGFBP3	3.58	10.33	8.48	0.83	0.57	T	T	0.0335	0.297	Coding
TC0X00007205.hg.1	histone deacetylase 6	HDAC6	3.57	11.35	9.51	0.27	0.25	T	T	1.87e-06	0.0002	Multiple_Complex
TC0900012158.hg.1	PALM2-AKAP2 readthrough	PALM2-AKAP2	3.57	10.1	8.26	0.27	0.43	T	T	0.0004	0.0152	Coding
TC0800008062.hg.1	zinc finger and BTB domain containing 10	ZBTB10	3.56	11.74	9.91	0.23	0.3	T	T	5.29e-05	0.0028	Coding
TC1600007014.hg.1	nudE neurodevelopment protein 1; microRNA 484	NDE1; MIR484	3.56	11.9	10.07	0.98	0.88	T	T	0.001	0.0288	Multiple_Complex
TC1700009541.hg.1	calmodulin binding transcription activator 2	CAMTA2	3.56	9.55	7.72	0.46	0.51	T	T	0.0002	0.0096	Multiple_Complex
TC2000007695.hg.1	protein tyrosine phosphatase, non-receptor type 1	PTPN1	3.56	13.51	11.68	0.2	0.42	T	T	9.54e-07	0.0001	Multiple_Complex
TC0100018262.hg.1	glutathione S-transferase mu 2 (muscle)	GSTM2	3.55	10.68	8.85	0.18	0.39	T	T	8.59e-06	0.0006	Multiple_Complex
TC0X00009917.hg.1	ectodysplasin A2 receptor	EDA2R	3.55	10.28	8.46	0.58	0.79	T	T	0.0182	0.2098	Multiple_Complex
TC0500008894.hg.1	RNA, 7SL, cytoplasmic 68, pseudogene [Source:HGNC Symbol;Acc:HGNC:46084]	RN7SL68P; AC008781.1	3.55	8.55	6.72	0.32	0.18	T	T	1.95e-07	2.67e-05	Multiple_Complex
TC1100011241.hg.1	mitogen-activated protein kinase kinase kinase 11	MAP3K11	3.54	13.56	11.73	0.48	0.21	T	T	5.72e-07	6.73e-05	Multiple_Complex
TC0100012473.hg.1	cyclin L2	CCNL2	3.54	13.12	11.29	0.57	0.53	T	T	0.0014	0.0374	Multiple_Complex
TC0600012839.hg.1	cyclin-dependent kinase 19	CDK19	3.54	10.54	8.72	0.57	1.11	T	T	0.0001	0.0059	Multiple_Complex
TC0700008306.hg.1	frizzled class receptor 1	FZD1	3.53	10.16	8.34	0.41	0.41	T	T	0.0003	0.0106	Coding
TC0200016710.hg.1	ankyrin repeat domain 36C	ANKRD36C	3.53	11.38	9.56	0.73	0.26	T	T	0.0055	0.0976	Multiple_Complex
TC0X00008871.hg.1		RP13-228J13.5	3.52	7.78	5.96	0.68	0.53	T	T	0.0003	0.0119	Multiple_Complex
TC1500010422.hg.1	isocitrate dehydrogenase 2 (NADP+), mitochondrial	IDH2	3.52	13.06	11.24	0.19	0.36	T	T	3.2e-07	4.08e-05	Multiple_Complex
TC1300009376.hg.1	SLIT and NTRK-like family, member 1	SLITRK1	3.51	9.62	7.81	0.17	0.58	T	T	8.6e-05	0.0041	Coding
TC1300009984.hg.1	SLIT and NTRK-like family, member 5	SLITRK5	3.51	8.24	6.43	0.22	0.13	T	T	1.38e-05	0.0009	Coding
TC0300011386.hg.1	prickle homolog 2	PRICKLE2	3.5	7.57	5.76	0.19	0.1	T	T	3.22e-07	4.1e-05	Multiple_Complex
TC0800010258.hg.1	K(lysine) acetyltransferase 6A	KAT6A	3.5	11.82	10.01	0.27	0.44	T	T	7.64e-06	0.0006	Multiple_Complex
TC0100018201.hg.1	mitochondrial fission regulator 1-like	MTFR1L	3.5	10.25	8.44	0.15	0.83	T	T	1.38e-06	0.0001	Multiple_Complex
TC0700012734.hg.1	cAMP responsive element binding protein 3-like 2	CREB3L2	3.49	10.34	8.54	0.23	0.61	T	T	6.06e-05	0.0031	Multiple_Complex
TC0200014636.hg.1		AC079150.2	3.48	9.33	7.53	0.45	0.37	T	T	0.0005	0.017	Multiple_Complex
TC1000008363.hg.1	phosphatase and tensin homolog	PTEN	3.48	14.99	13.19	0.41	0.51	T	T	2.56e-05	0.0015	Multiple_Complex
TC0100011472.hg.1	hedgehog acyltransferase	HHAT	3.47	7.74	5.94	0.69	0.54	T	T	9.97e-06	0.0007	Multiple_Complex
TC1200012704.hg.1	trichoplein, keratin filament binding	TCHP	3.46	7.48	5.69	0.13	0.57	T	T	0.0001	0.0056	Multiple_Complex
TC1100008024.hg.1	metastasis associated lung adenocarcinoma transcript 1 (non-protein coding)	MALAT1	3.46	17.89	16.1	0.19	0.77	T	T	0.0001	0.0063	Multiple_Complex
TC0800007330.hg.1	DDHD domain containing 2	DDHD2	3.44	11.36	9.58	0.43	0.43	T	T	4.54e-06	0.0004	Multiple_Complex
TC1200008734.hg.1	RIC8 guanine nucleotide exchange factor B	RIC8B	3.44	11.08	9.29	0.3	0.23	T	T	2.19e-05	0.0014	Multiple_Complex
TC0800007311.hg.1	adhesion G protein-coupled receptor A2	ADGRA2	3.44	7.91	6.13	0.63	0.5	T	T	1.09e-05	0.0008	Multiple_Complex
TC0100015211.hg.1	glutathione S-transferase mu 3 (brain)	GSTM3	3.43	9.23	7.45	1.03	0.42	T	T	0.014	0.1792	Multiple_Complex
TC1200009192.hg.1	B-cell CLL/lymphoma 7A	BCL7A	3.43	9.56	7.78	0.5	0.38	T	T	5.55e-07	6.57e-05	Multiple_Complex
TC0100013761.hg.1	four and a half LIM domains 3	FHL3	3.41	10.18	8.41	0.81	0.62	T	T	0.0002	0.0067	Multiple_Complex
TC1100013084.hg.1	angiomotin like 1	AMOTL1	3.41	10.56	8.8	0.67	0.31	T	T	0.0003	0.0113	Multiple_Complex
TC1200007822.hg.1	IKAROS family zinc finger 4	IKZF4	3.4	8.27	6.5	0.27	0.71	T	T	0.0016	0.0399	Multiple_Complex
TC1000009090.hg.1	BCL2-associated athanogene 3	BAG3	3.4	11.07	9.31	0.66	0.47	T	T	0.011	0.1543	Coding
TC0200008655.hg.1	mitogen-activated protein kinase kinase kinase kinase 4	MAP4K4	3.39	13.95	12.19	0.07	0.09	T	T	2.31e-08	4.33e-06	Multiple_Complex
TC1700011234.hg.1	CUE domain containing 1	CUEDC1	3.38	9.46	7.7	0.17	0.3	T	T	1.5e-06	0.0001	Multiple_Complex
TC0100009770.hg.1	neuroblastoma breakpoint family, member 12	NBPF12	3.38	11.68	9.92	0.76	0.42	T	T	0.0004	0.0143	Multiple_Complex
TC0100011566.hg.1	prospero homeobox 1	PROX1	3.37	7.07	5.31	0.67	0.74	T	F	0.0018	0.0443	Multiple_Complex
TC1900010032.hg.1	ceramide synthase 1; growth differentiation factor 1	CERS1; GDF1	3.37	10.17	8.42	0.56	0.13	T	T	0.0001	0.0054	Multiple_Complex
TC0900010277.hg.1		RP11-460E7.8	3.37	6.58	4.83	0.51	0.39	T	T	0.002	0.0472	Multiple_Complex
TC0600007617.hg.1	chromosome 6 open reading frame 48; small nucleolar RNA, C/D box 52; small nucleolar RNA, C/D box 48	C6orf48; SNORD52; SNORD48	3.36	14.18	12.43	0.32	0.29	T	T	1.1e-06	0.0001	Multiple_Complex
TC0200007533.hg.1	forkhead box N2	FOXN2	3.35	12.61	10.86	0.5	0.6	T	T	0.0418	0.333	Multiple_Complex
TC1200012864.hg.1	coiled-coil domain containing 92	CCDC92	3.35	8.23	6.49	0.58	0.12	T	T	0.0006	0.0205	Multiple_Complex
TC0100013713.hg.1	serine/threonine kinase 40	STK40	3.35	9.66	7.91	0.43	0.41	T	T	0.0024	0.0543	Multiple_Complex
TC1000009851.hg.1	FERM domain containing 4A	FRMD4A	3.35	13.14	11.4	0.45	0.16	T	T	0.0007	0.0229	Multiple_Complex
TC0800010379.hg.1	EF-hand calcium binding domain 1	EFCAB1	3.35	7.23	5.49	0.54	0.34	T	T	0.0004	0.0146	Multiple_Complex
TC0600009322.hg.1	heat shock transcription factor 2	HSF2	3.34	12.94	11.2	0.4	0.38	T	T	0.002	0.0477	Multiple_Complex
TC0200011219.hg.1	atypical chemokine receptor 3	ACKR3	3.34	6.53	4.79	0.62	0.22	T	T	0.0167	0.1993	Multiple_Complex
TC0400011916.hg.1	protocadherin 18	PCDH18	3.33	14.01	12.27	0.43	0.48	T	T	0.0044	0.0838	Multiple_Complex
TC0900009882.hg.1	DDB1 and CUL4 associated factor 12	DCAF12	3.33	12.51	10.77	0.17	0.48	T	T	8.69e-07	9.46e-05	Multiple_Complex
TC0500009077.hg.1	HMG box domain containing 3	HMGXB3	3.33	11.32	9.59	0.42	0.25	T	T	2.87e-07	3.72e-05	Multiple_Complex
TC1200009239.hg.1	lysine (K)-specific methyltransferase 5A	KMT5A	3.32	10.78	9.04	0.34	0.48	T	T	0.0009	0.0267	Multiple_Complex
TC0200008353.hg.1	ankyrin repeat domain 36B pseudogene 2	ANKRD36BP2	3.32	10.13	8.4	0.39	0.39	T	T	0.0046	0.0859	Multiple_Complex
TC1700011084.hg.1	protein phosphatase 1, regulatory subunit 9B	PPP1R9B	3.31	7.73	6	0.27	0.51	T	T	3.73e-06	0.0003	Multiple_Complex
TC0500013349.hg.1	fibrillin 2	FBN2	3.31	8.48	6.75	0.32	0.16	T	T	0.0035	0.0711	Multiple_Complex
TC2100007467.hg.1	disco-interacting protein 2 homolog A	DIP2A	3.31	9.96	8.23	0.16	0.22	T	T	5.95e-07	6.94e-05	Multiple_Complex
TC1100009969.hg.1	amyloid beta (A4) precursor protein-binding, family B, member 1 (Fe65)	APBB1	3.3	7.91	6.19	0.52	0.39	T	T	0.0002	0.0097	Multiple_Complex
TC0600013794.hg.1	1-acylglycerol-3-phosphate O-acyltransferase 4	AGPAT4	3.3	11.89	10.17	0.87	0.13	T	T	2.21e-06	0.0002	Multiple_Complex
TC1800006448.hg.1	thymidylate synthetase	TYMS	3.3	15.08	13.35	0.58	0.42	T	T	3.21e-06	0.0003	Multiple_Complex
TC1100011141.hg.1	REST corepressor 2	RCOR2	3.3	9.27	7.55	0.62	0.4	T	T	0.0007	0.022	Multiple_Complex
TC0900008173.hg.1	acidic nuclear phosphoprotein 32 family member B	ANP32B	3.3	16.14	14.41	0.35	0.17	T	T	3.19e-06	0.0003	Multiple_Complex
TC0700012551.hg.1		RP11-309L24.6	3.3	7.61	5.89	0.94	0.19	T	T	0.0025	0.0565	Multiple_Complex
TC1200010615.hg.1	limb development membrane protein 1-like	LMBR1L	3.29	10.46	8.75	0.55	0.36	T	T	3.27e-06	0.0003	Multiple_Complex
TC0500012459.hg.1	platelet-derived growth factor receptor, beta polypeptide	PDGFRB	3.29	9.6	7.89	1.07	0.61	T	T	1.53e-05	0.001	Multiple_Complex
TC0300013090.hg.1	polyhomeotic homolog 3 (Drosophila)	PHC3	3.29	13.37	11.66	0.39	0.65	T	T	0.0033	0.0684	Multiple_Complex
TC0900011565.hg.1	angiopoietin like 2	ANGPTL2	3.28	7.95	6.23	0.23	0.13	T	T	9.05e-07	9.78e-05	Multiple_Complex
TC0700012109.hg.1	RAS p21 protein activator 4CD, pseudogene [Source:HGNC Symbol;Acc:HGNC:44226]	RASA4DP	3.28	6.89	5.18	0.3	0.16	T	T	4.16e-05	0.0023	Multiple_Complex
TC1100012990.hg.1	MIR670 host gene; hydroxysteroid (17-beta) dehydrogenase 12	MIR670HG; HSD17B12	3.28	6.42	4.71	0.92	0.62	T	F	0.0003	0.0111	Multiple_Complex
TC0700012126.hg.1	reelin	RELN	3.28	5.38	3.66	0.67	0.22	T	F	0.0174	0.2041	Multiple_Complex
TC2000008185.hg.1	small nucleolar RNA, C/D box 119	SNORD119	3.27	10.39	8.68	0.56	0.6	T	T	0.0113	0.1569	Multiple_Complex
TC1200006967.hg.1	deoxyribose-phosphate aldolase (putative)	DERA	3.27	11.75	10.05	0.23	0.36	T	T	6.48e-05	0.0033	Multiple_Complex
TC0X00008526.hg.1	four and a half LIM domains 1	FHL1	3.26	10.8	9.09	0.46	1.01	T	T	0.0016	0.0407	Multiple_Complex
TC1200010569.hg.1	ankyrin repeat and SOCS box containing 8	ASB8	3.26	10.83	9.12	0.1	0.45	T	T	1.98e-06	0.0002	Multiple_Complex
TC0200013567.hg.1	ankyrin repeat domain 36B	ANKRD36B	3.26	11.32	9.62	0.65	0.6	T	T	0.0203	0.2235	Multiple_Complex
TC1200008081.hg.1	dual specificity tyrosine-(Y)-phosphorylation regulated kinase 2	DYRK2	3.26	9.48	7.77	0.3	0.58	T	T	3.27e-05	0.0019	Multiple_Complex
TC0400006938.hg.1	coiled-coil and C2 domain containing 2A	CC2D2A	3.26	8.9	7.2	0.3	0.25	T	T	3.19e-08	5.73e-06	Multiple_Complex
TC0400012969.hg.1	SET domain containing (lysine methyltransferase) 7	SETD7	3.26	8.45	6.74	0.33	0.33	T	T	9.56e-06	0.0007	Multiple_Complex
TC1000007543.hg.1	growth differentiation factor 10	GDF10	3.25	5.82	4.12	0.77	0.01	T	T	0.0032	0.0671	Coding
TC1200010809.hg.1	activating transcription factor 7; neuropeptide FF-amide peptide precursor	ATF7; NPFF	3.25	11.18	9.48	0.74	0.15	T	T	0.0004	0.0149	Multiple_Complex
TC0800010894.hg.1	hes-related family bHLH transcription factor with YRPW motif 1	HEY1	3.25	8.39	6.69	1.4	0.53	T	T	0.0324	0.291	Multiple_Complex
TC0400008137.hg.1	coiled-coil serine rich protein 1	CCSER1	3.24	5.72	4.02	0.39	0.1	T	F	0.0003	0.0127	Multiple_Complex
TC0500009411.hg.1	RAN binding protein 17	RANBP17	3.24	11.25	9.55	0.71	0.13	T	T	0.0016	0.0411	Multiple_Complex
TC1200011838.hg.1	chemerin chemokine-like receptor 1	CMKLR1	3.24	6.7	5.01	1.68	0.23	T	T	0.0058	0.1013	Multiple_Complex
TC0900011998.hg.1	small nucleolar RNA, H/ACA box 17A; small nucleolar RNA, H/ACA box 17B; small nucleolar RNA host gene 7	SNORA17A; SNORA17B; SNHG7	3.24	10.32	8.63	0.37	0.31	T	T	1.6e-05	0.001	Multiple_Complex
TC1700007777.hg.1	thyroid hormone receptor, alpha	THRA	3.24	9.76	8.07	0.45	0.17	T	T	1.18e-05	0.0008	Multiple_Complex
TC1100007507.hg.1	protein tyrosine phosphatase, receptor type, J	PTPRJ	3.24	11.28	9.59	0.45	0.66	T	T	0.0015	0.0393	Multiple_Complex
TC0700008351.hg.1	guanine nucleotide binding protein (G protein), gamma 11	GNG11	3.24	6.82	5.12	0.41	0.27	T	T	9.73e-06	0.0007	Multiple_Complex
TC0400012907.hg.1	adhesion G protein-coupled receptor A3	ADGRA3	3.23	13.39	11.7	0.63	0.09	T	T	5.78e-05	0.003	Multiple_Complex
TC0100015580.hg.1	neuroblastoma breakpoint family, member 20	NBPF20	3.22	10.89	9.2	0.47	0.45	T	T	1.04e-05	0.0007	Coding
TC0300011550.hg.1	PDZ domain containing ring finger 3	PDZRN3	3.22	11.38	9.69	0.38	0.78	T	T	0.0104	0.1484	Multiple_Complex
TC2000007246.hg.1	discs, large (Drosophila) homolog-associated protein 4	DLGAP4	3.22	10.98	9.29	0.11	0.22	T	T	6.32e-06	0.0005	Multiple_Complex
TC1700007080.hg.1	retinoic acid induced 1	RAI1	3.22	6.24	4.55	0.27	0.31	T	T	6.47e-07	7.4e-05	Multiple_Complex
TC0300007051.hg.1	integrin alpha 9	ITGA9	3.21	8.09	6.4	0.88	0.46	T	T	8.88e-05	0.0043	Multiple_Complex
TC1900011029.hg.1	Meis homeobox 3	MEIS3	3.21	12.32	10.63	0.29	0.67	T	T	3.93e-05	0.0022	Multiple_Complex
TC0300012564.hg.1	DAZ interacting zinc finger protein 1-like	DZIP1L	3.21	8.04	6.36	0.21	0.34	T	T	1.26e-06	0.0001	Multiple_Complex
TC1000012542.hg.1	zinc finger protein 438	ZNF438	3.21	8.93	7.25	0.18	0.56	T	T	4.79e-05	0.0026	Multiple_Complex
TC2000007817.hg.1	family with sequence similarity 210, member B	FAM210B	3.21	9.31	7.63	0.75	0.46	T	T	0.0005	0.0176	Multiple_Complex
TC2200008637.hg.1	interleukin 2 receptor, beta	IL2RB	3.2	7.29	5.61	0.4	0.06	T	T	3.69e-06	0.0003	Multiple_Complex
TC0800006983.hg.1	protein phosphatase 3, catalytic subunit, gamma isozyme	PPP3CC	3.2	9.46	7.78	0.86	0.21	T	T	1.96e-05	0.0012	Multiple_Complex
TC1000009516.hg.1	disco-interacting protein 2 homolog C	DIP2C	3.19	9.54	7.86	0.05	0.43	T	T	1.17e-06	0.0001	Multiple_Complex
TC0300013787.hg.1	tubulin tyrosine ligase-like family member 3	TTLL3	3.19	9.6	7.93	0.18	0.23	T	T	0.0002	0.0068	Multiple_Complex
TC0500006712.hg.1	small nucleolar RNA, C/D box 123; small nucleolar RNA host gene 18	SNORD123; SNHG18	3.18	11.75	10.08	1.31	0.43	T	T	0.001	0.0285	Multiple_Complex
TC0200013531.hg.1	KAT8 regulatory NSL complex subunit 3	KANSL3	3.18	10.6	8.93	0.37	0.17	T	T	0.0001	0.0051	Multiple_Complex
TC0500013241.hg.1	protocadherin beta 5	PCDHB5	3.18	11.19	9.52	0.21	0.59	T	T	0.0001	0.006	Coding
TC1800008281.hg.1	transmembrane protein 241	TMEM241	3.18	9.02	7.35	0.07	0.93	T	T	0.0003	0.0119	Multiple_Complex
TC0100010137.hg.1	Homo sapiens misato family member 2, pseudogene (MSTO2P), non-coding RNA.	MSTO2P	3.18	9.47	7.8	0.52	0.76	T	T	0.0001	0.0053	Multiple_Complex
TC0X00008084.hg.1	collagen, type IV, alpha 5	COL4A5	3.17	8.62	6.96	0.07	0.49	T	T	0.0043	0.0821	Multiple_Complex
TC0600011463.hg.1	sialidase 1 (lysosomal sialidase)	NEU1	3.17	10.91	9.24	1.25	0.45	T	T	0.0141	0.1796	Multiple_Complex
TC2100008560.hg.1	downstream neighbor of SON; crystallin zeta like 1	DONSON; CRYZL1	3.17	12.48	10.81	0.24	0.07	T	T	3.2e-06	0.0003	Multiple_Complex
TC0200010836.hg.1	zinc finger, AN1-type domain 2B	ZFAND2B	3.17	8.88	7.21	0.31	0.12	T	T	8.66e-06	0.0006	Multiple_Complex
TC0100008664.hg.1	growth arrest and DNA-damage-inducible, alpha	GADD45A	3.17	10.19	8.53	0.59	0.37	T	T	0.0003	0.0101	Multiple_Complex
TC1100009026.hg.1	salt-inducible kinase 2	SIK2	3.16	10.66	9	0.48	0.37	T	T	1.34e-05	0.0009	Multiple_Complex
TC1300007794.hg.1	FERM, ARH/RhoGEF and pleckstrin domain protein 1; microRNA 3170	FARP1; MIR3170	3.15	15.55	13.9	0.51	0.4	T	T	6.12e-06	0.0005	Multiple_Complex
TC0500013229.hg.1	chromosome 5 open reading frame 24	C5orf24	3.15	10.35	8.7	0.35	0.48	T	T	9.62e-05	0.0045	Multiple_Complex
TC1300008702.hg.1	E74-like factor 1 (ets domain transcription factor)	ELF1	3.15	11.33	9.67	0.54	0.74	T	T	7.53e-05	0.0037	Multiple_Complex
TC0900010082.hg.1		AL772307.1	3.15	5.66	4	0.75	0.86	T	F	0.0481	0.3584	Multiple_Complex
TC1600010316.hg.1	TOX high mobility group box family member 3	TOX3	3.15	12.43	10.77	0.29	0.51	T	T	0.0016	0.041	Multiple_Complex
TC0300012323.hg.1	monoglyceride lipase	MGLL	3.14	6.43	4.78	1.03	0.3	T	F	0.0008	0.0229	Multiple_Complex
TC1100007366.hg.1	tetratricopeptide repeat domain 17	TTC17	3.14	13.17	11.52	0.28	0.43	T	T	0.0003	0.0119	Multiple_Complex
TC0600011857.hg.1	cullin 7	CUL7	3.14	10.07	8.42	0.5	0.24	T	T	3.56e-06	0.0003	Multiple_Complex
TC0700007361.hg.1	ubiquitin-conjugating enzyme E2D 4 (putative)	UBE2D4	3.13	9.83	8.18	0.6	0.6	T	T	0.0027	0.0593	Multiple_Complex
TC1700012194.hg.1	zinc finger protein 286A	ZNF286A	3.13	10.6	8.95	0.49	0.21	T	T	6.46e-05	0.0033	Multiple_Complex
TC2200008883.hg.1	ribosomal RNA processing 7 homolog B, pseudogene	RRP7BP	3.13	12.45	10.8	0.34	0.11	T	T	3.08e-05	0.0018	Multiple_Complex
TC0900012240.hg.1	aquaporin 7 pseudogene 2	AQP7P2	3.12	6.55	4.91	0.83	0.37	T	T	0.0078	0.1235	Multiple_Complex
TC1000010273.hg.1	neuropilin 1	NRP1	3.12	7.47	5.83	0.65	0.39	T	T	0.006	0.1031	Multiple_Complex
TC0100009345.hg.1	cadherin, EGF LAG seven-pass G-type receptor 2	CELSR2	3.11	5.88	4.24	1.27	0.05	T	T	9.38e-05	0.0044	Multiple_Complex
TC1000009999.hg.1	SKI/DACH domain containing 1	SKIDA1	3.11	8.12	6.48	0.53	0.88	T	T	3.43e-05	0.002	Multiple_Complex
TC1800007320.hg.1	mitogen-activated protein kinase 4	MAPK4	3.11	7.13	5.49	0.58	0.22	T	T	0.0006	0.0181	Multiple_Complex
TC0200014269.hg.1	POTE ankyrin domain family, member I	POTEI	3.1	10.1	8.46	0.13	0.46	T	T	3.84e-05	0.0022	Multiple_Complex
TC0300006691.hg.1	FYVE, RhoGEF and PH domain containing 5	FGD5	3.1	8.31	6.67	0.4	0.09	T	T	0.0002	0.0078	Multiple_Complex
TC1700006768.hg.1	ephrin-B3	EFNB3	3.1	9.31	7.68	0.1	0.25	T	T	3.66e-06	0.0003	Coding
TC1400009426.hg.1	MYC associated factor X	MAX	3.1	12.45	10.82	0.2	0.51	T	T	7.07e-08	1.13e-05	Multiple_Complex
TC0600011377.hg.1	nurim (nuclear envelope membrane protein)	NRM	3.09	12.7	11.07	0.69	0.6	T	T	0.0049	0.0898	Multiple_Complex
TC2000008381.hg.1	jagged 1	JAG1	3.09	10.76	9.13	0.41	0.87	T	T	0.0015	0.0396	Multiple_Complex
TC1200010234.hg.1		RP11-874G11.1	3.09	9.03	7.4	0.15	0.46	T	T	0.0041	0.0794	Multiple_Complex
TC1300007706.hg.1	miR-17-92 cluster host gene; microRNA 17; microRNA 18a; microRNA 19a; microRNA 19b-1; microRNA 20a; microRNA 92a-1	MIR17HG; MIR17; MIR18A; MIR19A; MIR19B1; MIR20A; MIR92A1	3.09	10.08	8.45	0.7	0.96	T	T	2.13e-05	0.0013	Multiple_Complex
TC0500008157.hg.1	leucyl/cystinyl aminopeptidase	LNPEP	3.09	9.91	8.28	0.35	0.17	T	T	3.2e-05	0.0019	Multiple_Complex
TC2000007157.hg.1	core-binding factor, runt domain, alpha subunit 2; translocated to, 2	CBFA2T2	3.09	10.55	8.92	0.7	0.63	T	T	0.0001	0.0055	Multiple_Complex
TC1600011428.hg.1	telomeric repeat binding factor 2, interacting protein	TERF2IP	3.08	10	8.38	0.58	0.47	T	T	6.78e-07	7.71e-05	Coding
TC0100011364.hg.1	SLIT-ROBO Rho GTPase activating protein 2	SRGAP2	3.08	13.05	11.42	0.24	0.21	T	T	2.12e-07	2.87e-05	Multiple_Complex
TC1900007267.hg.1	adaptor-related protein complex 1, mu 1 subunit	AP1M1	3.08	11.44	9.82	0.24	0.16	T	T	2.57e-05	0.0015	Multiple_Complex
TC0200008501.hg.1	inositol 1,4,5-trisphosphate receptor interacting protein-like 1	ITPRIPL1	3.08	11.03	9.4	0.9	0.42	T	T	0.001	0.0281	Coding
TC2200009345.hg.1	C1q and tumor necrosis factor related protein 6	C1QTNF6	3.08	8.21	6.58	0.01	0.03	T	T	7.15e-06	0.0005	Multiple_Complex
TC0300013384.hg.1	chloride channel, voltage-sensitive 2	CLCN2	3.08	8.01	6.39	0.33	0.28	T	T	0.0002	0.0096	Multiple_Complex
TC1000010230.hg.1		GLUDP5	3.08	16	14.38	0.32	0.17	T	T	2.36e-05	0.0014	Multiple_Complex
TC1000010006.hg.1	DnaJ (Hsp40) homolog, subfamily C, member 1	DNAJC1	3.08	12.12	10.49	0.61	0.53	T	T	4.1e-06	0.0003	Multiple_Complex
TC0300006561.hg.1	jagunal homolog 1	JAGN1	3.08	10.53	8.91	0.31	0.52	T	T	0.0017	0.0433	Multiple_Complex
TC1200007630.hg.1	LETM1 domain containing 1	LETMD1	3.08	12.06	10.43	0.53	0.4	T	T	0.0002	0.0096	Multiple_Complex
TC2200008181.hg.1	zinc finger protein 70	ZNF70	3.07	8.08	6.46	0.57	0.44	T	T	1.25e-05	0.0009	Multiple_Complex
TC0300009324.hg.1	IQ motif containing J; schwannomin interacting protein 1; IQCJ-SCHIP1 readthrough	IQCJ; SCHIP1; IQCJ-SCHIP1	3.07	11.01	9.39	0.25	0.45	T	T	0.0002	0.0084	Multiple_Complex
TC1300008084.hg.1	ATPase, class VI, type 11A	ATP11A	3.07	10.53	8.92	0.54	0.59	T	T	0.0005	0.0156	Multiple_Complex
TC1200010538.hg.1	adhesion molecule with Ig-like domain 2	AMIGO2	3.06	7.88	6.26	0.37	0.56	T	T	0.0001	0.0061	Coding
TC1700012193.hg.1	nudE neurodevelopment protein 1-like 1	NDEL1	3.06	12.33	10.71	0.41	0.39	T	T	3.3e-05	0.0019	Multiple_Complex
TC0100007660.hg.1	transmembrane protein 39B	TMEM39B	3.06	7.31	5.7	0.43	1	T	T	0.0175	0.2049	Multiple_Complex
TC0900007321.hg.1	SPATA31 subfamily A, member 5; SPATA31 subfamily A, member 7	SPATA31A5; SPATA31A7	3.06	6.25	4.63	0.41	0.35	T	T	8.34e-05	0.0041	Multiple_Complex
TC0800008011.hg.1	zinc finger homeobox 4	ZFHX4	3.05	8.14	6.53	0.94	0.43	T	T	0.0024	0.0552	Multiple_Complex
TC0900012212.hg.1	perilipin 2	PLIN2	3.05	11.84	10.23	0.4	0.47	T	T	3e-06	0.0003	Multiple_Complex
TC0600013119.hg.1	SOGA family member 3; KIAA0408	SOGA3; KIAA0408	3.05	10.94	9.33	0.58	0.58	T	T	0.016	0.194	Multiple_Complex
TC1100007285.hg.1	four jointed box 1	FJX1	3.05	9.68	8.07	0.39	0.1	T	T	0.0023	0.0529	Multiple_Complex
TC1700009150.hg.1	BAI1-associated protein 2	BAIAP2	3.05	7.77	6.16	0.63	1.11	T	T	6.09e-05	0.0031	Multiple_Complex
TC0X00006666.hg.1	ubiquitin-conjugating enzyme E2E 4 pseudogene	UBE2E4P	3.05	10.99	9.38	0.3	0.31	T	T	2.94e-06	0.0003	Multiple_Complex
TC0900008314.hg.1	fibronectin type III and SPRY domain containing 1-like	FSD1L	3.05	9.13	7.52	0.49	0.72	T	T	0.0289	0.2735	Multiple_Complex
TC0200012933.hg.1	cannabinoid receptor interacting protein 1	CNRIP1	3.04	5.33	3.73	0.77	0.34	T	T	0.0014	0.0366	Multiple_Complex
TC2200008710.hg.1	Josephin domain containing 1	JOSD1	3.04	10.33	8.73	0.28	0.22	T	T	3.97e-05	0.0022	Multiple_Complex
TC1400008633.hg.1	small nucleolar RNA, C/D box 8	SNORD8	3.04	13.01	11.41	0.59	0.67	T	T	0.0158	0.1928	Multiple_Complex
TC1700010859.hg.1	dephospho-CoA kinase domain containing	DCAKD	3.03	16.3	14.7	0.28	0.21	T	T	4.19e-05	0.0023	Multiple_Complex
TC0200009765.hg.1		AC005042.3	3.03	6.76	5.16	0.3	0.3	T	T	6.11e-05	0.0031	Multiple_Complex
TC1100013030.hg.1	fibronectin leucine rich transmembrane protein 1	FLRT1	3.02	6.95	5.35	0.14	0.27	T	T	8.42e-05	0.0041	Coding
TC0900009414.hg.1	regulatory factor X, 3 (influences HLA class II expression)	RFX3	3.02	10.19	8.6	0.82	0.57	T	T	0.0057	0.1	Multiple_Complex
TC0800007027.hg.1	solute carrier family 25 (mitochondrial iron transporter), member 37	SLC25A37	3.02	9.35	7.75	0.32	0.46	T	T	0.0002	0.0079	Multiple_Complex
TC1100012520.hg.1	melanoma cell adhesion molecule; microRNA 6756	MCAM; MIR6756	3.02	6.72	5.13	0.09	0.28	T	T	0.0003	0.011	Multiple_Complex
TC1000010827.hg.1	DnaJ (Hsp40) homolog, subfamily C, member 12	DNAJC12	3.02	7.56	5.96	0.58	0.19	T	T	0.0021	0.0494	Multiple_Complex
TC0100009646.hg.1	neuroblastoma breakpoint family, member 26	NBPF26	3.01	10.36	8.77	0.75	0.38	T	T	0.0001	0.0065	Coding
TC0600014333.hg.1	microtubule associated monooxygenase, calponin and LIM domain containing 1	MICAL1	3.01	9.55	7.96	0.59	0.65	T	T	0.0016	0.0414	Multiple_Complex
TC1200011587.hg.1		RP11-490G8.1	3.01	12.87	11.28	0.14	0.42	T	T	0.0048	0.0887	Multiple_Complex
TC0400011486.hg.1	CXXC finger protein 4	CXXC4	3.01	4.88	3.29	0.27	0.43	T	T	0.0007	0.0224	Multiple_Complex
TC1000012586.hg.1	SEC31 homolog B, COPII coat complex component	SEC31B	3.01	7.91	6.32	0.54	0.45	T	T	4.52e-05	0.0025	Multiple_Complex
TC1400007466.hg.1	fucosyltransferase 8 (alpha (1,6) fucosyltransferase)	FUT8	3.01	13.86	12.27	0.02	0.57	T	T	2.16e-05	0.0013	Multiple_Complex
TC2000009017.hg.1	suppressor of glucose, autophagy associated 1	SOGA1	3	10.28	8.69	0.53	0.12	T	T	2.17e-05	0.0013	Multiple_Complex
TC1900011889.hg.1	mannosidase, alpha, class 2B, member 1	MAN2B1	3	10.42	8.84	0.43	0.47	T	T	0.0001	0.006	Multiple_Complex
TC2000007037.hg.1	uncharacterized LOC100134868; Salzman2013 ANNOTATED, INTERNAL, ncRNA, OVEXON best transcript TCONS_l2_00016753	LOC100134868; TCONS_l2_00016753	3	8.53	6.94	0.37	0.68	T	T	0.002	0.0468	Multiple_Complex
TC1400010377.hg.1	v-akt murine thymoma viral oncogene homolog 1	AKT1	2.99	11.84	10.25	0.3	0.41	T	T	5.95e-06	0.0005	Multiple_Complex
TC1900008180.hg.1	zinc finger protein 526	ZNF526	2.99	10.45	8.86	0.48	0.2	T	T	4.93e-05	0.0026	Coding
TC1700011264.hg.1	Small nucleolar RNA U3 [Source:RFAM;Acc:RF00012]	U3	2.99	9.72	8.14	1.28	0.04	T	T	0.0134	0.1741	Multiple_Complex
TC1100009981.hg.1	tripeptidyl peptidase I	TPP1	2.99	9.51	7.93	0.4	0.15	T	T	0.0014	0.0371	Multiple_Complex
TC1700007585.hg.1	schlafen family member 5	SLFN5	2.98	9.48	7.9	0.23	0.26	T	T	0.0012	0.0331	Multiple_Complex
TC0200010152.hg.1	ubiquitin-conjugating enzyme E2E 3	UBE2E3	2.98	13.6	12.03	0.26	0.19	T	T	1.78e-07	2.48e-05	Multiple_Complex
TC1700007042.hg.1	myosin phosphatase Rho interacting protein	MPRIP	2.98	15.11	13.53	0.13	0.23	T	T	8.01e-07	8.89e-05	Multiple_Complex
TC2200009357.hg.1	protein kinase C and casein kinase substrate in neurons 2	PACSIN2	2.98	12.47	10.89	0.29	0.86	T	T	3.3e-05	0.0019	Multiple_Complex
TC0500008891.hg.1	protocadherin gamma subfamily B, 8 pseudogene	PCDHGB8P	2.97	7.15	5.58	0.47	0.16	T	T	1e-05	0.0007	Multiple_Complex
TC1400010575.hg.1	BCL2-like 2	BCL2L2	2.97	8.22	6.65	0.63	0.04	T	T	2.12e-05	0.0013	Multiple_Complex
TC0900010311.hg.1	family with sequence similarity 27, member E3	FAM27E3	2.97	7.24	5.67	0.26	0.32	T	T	0.0006	0.0183	Multiple_Complex
TC1500010890.hg.1	hexosaminidase A (alpha polypeptide)	HEXA	2.97	11.1	9.53	0.46	0.51	T	T	8.42e-05	0.0041	Multiple_Complex
TC0600010609.hg.1	PX domain containing 1	PXDC1	2.96	6.64	5.08	0.68	0.18	T	T	2.37e-05	0.0014	Multiple_Complex
TC2100008027.hg.1	potassium channel, voltage gated subfamily E regulatory beta subunit 1	KCNE1	2.96	5.41	3.85	1.3	0.12	T	F	0.0055	0.0976	Multiple_Complex
TC1100013130.hg.1	insulin-like growth factor 2; INS-IGF2 readthrough	IGF2; INS-IGF2	2.96	6.66	5.09	0.56	0.38	T	T	0.001	0.0294	Multiple_Complex
TC1300009765.hg.1	insulin receptor substrate 2	IRS2	2.96	9.11	7.54	0.44	0.48	T	T	0.0006	0.0197	Multiple_Complex
TC0900008491.hg.1	regulator of G-protein signaling 3	RGS3	2.95	7.14	5.57	0.65	0.37	T	T	0.0016	0.0414	Multiple_Complex
TC0700012663.hg.1	Homo sapiens microRNA 3654 (MIR3654), microRNA.	MIR3654	2.95	17.19	15.63	0.15	0.36	T	T	4.83e-07	5.78e-05	Multiple_Complex
TC1000011329.hg.1	NUTM2A antisense RNA 1	NUTM2A-AS1	2.95	15.07	13.51	0.25	0.31	T	T	1.62e-05	0.0011	Multiple_Complex
TC1200007989.hg.1	transmembrane protein 5	TMEM5	2.95	9.78	8.22	0.33	0.35	T	T	0.01	0.1451	Multiple_Complex
TC1100007785.hg.1	transmembrane protein 109	TMEM109	2.95	12.58	11.02	0.55	0.74	T	T	0.0003	0.012	Multiple_Complex
TC0500007798.hg.1		CTD-2503O16.1	2.95	9.74	8.18	0.09	0.71	T	T	0.001	0.0296	Multiple_Complex
TC1400007310.hg.1	KIAA0586	KIAA0586	2.95	12.39	10.83	0.26	0.4	T	T	0.0041	0.0789	Multiple_Complex
TC0100014201.hg.1	coiled-coil and C2 domain containing 1B	CC2D1B	2.95	7.4	5.84	0.29	0.47	T	T	0.0001	0.0063	Multiple_Complex
TC2100007508.hg.1	potassium channel, voltage gated subfamily E regulatory beta subunit 1	KCNE1	2.94	6.4	4.84	1.23	0.11	T	T	0.0069	0.1131	Coding
TC0400012951.hg.1	solute carrier family 9, subfamily B (NHA2, cation proton antiporter 2), member 2	SLC9B2	2.94	8.26	6.71	0.67	0.26	T	T	0.0002	0.0067	Multiple_Complex
TC1200011474.hg.1	ATPase, Ca++ transporting, plasma membrane 1	ATP2B1	2.94	10.77	9.21	0.1	0.69	T	T	0.0259	0.2572	Multiple_Complex
TC1500010923.hg.1	de-etiolated homolog 1 (Arabidopsis)	DET1	2.94	10.69	9.13	0.43	0.59	T	T	0.0001	0.0054	Multiple_Complex
TC1700007779.hg.1	male-specific lethal 1 homolog (Drosophila)	MSL1	2.93	11.78	10.23	0.39	0.53	T	T	2.7e-06	0.0002	Multiple_Complex
TC0900007010.hg.1	ubiquitin-conjugating enzyme E2R 2	UBE2R2	2.93	13.83	12.28	0.29	0.46	T	T	1.99e-05	0.0013	Multiple_Complex
TC0300006993.hg.1	cartilage associated protein	CRTAP	2.92	17.82	16.28	0.13	0.14	T	T	1.1e-05	0.0008	Multiple_Complex
TC0100018355.hg.1	ras homolog family member U	RHOU	2.92	9.34	7.79	0.67	0.61	T	T	0.006	0.103	Multiple_Complex
TC0300013859.hg.1	CD200 molecule	CD200	2.91	15.79	14.25	0.2	0.67	T	T	0.0002	0.0074	Multiple_Complex
TC0300013874.hg.1	signal recognition particle receptor, B subunit	SRPRB	2.91	12.35	10.81	0.39	0.38	T	T	4.89e-05	0.0026	Multiple_Complex
TC1200007819.hg.1	cyclin-dependent kinase 2	CDK2	2.91	13.24	11.7	0.34	0.16	T	T	4.28e-06	0.0003	Multiple_Complex
TC1600008888.hg.1	ribosomal protein L13; small nucleolar RNA, C/D box 68	RPL13; SNORD68	2.91	15.81	14.27	0.13	0.47	T	T	0.0002	0.0075	Multiple_Complex
TC1700007017.hg.1	small nucleolar RNA, C/D box 49A; small nucleolar RNA, C/D box 65; LRRC75A antisense RNA 1	SNORD49A; SNORD65; LRRC75A-AS1	2.9	17.32	15.78	0.1	0.24	T	T	2.93e-06	0.0003	Multiple_Complex
TC1400006998.hg.1	leucine rich repeat and fibronectin type III domain containing 5	LRFN5	2.9	7	5.47	0.17	0.08	T	T	0.0001	0.0049	Multiple_Complex
TC1900006561.hg.1	secretory carrier membrane protein 4; adenosine deaminase, tRNA-specific 3	SCAMP4; ADAT3	2.9	6.98	5.45	0.44	0.45	T	T	0.0036	0.0719	Multiple_Complex
TC1700012344.hg.1	GABA(A) receptor-associated protein	GABARAP	2.9	16.6	15.06	0.26	0.51	T	T	7.08e-05	0.0035	Multiple_Complex
TC0100008075.hg.1	ST3 beta-galactoside alpha-2,3-sialyltransferase 3; microRNA 6079	ST3GAL3; MIR6079	2.9	10.63	9.09	0.32	0.68	T	T	6.21e-05	0.0032	Multiple_Complex
TC0100009479.hg.1	DNA cross-link repair 1B	DCLRE1B	2.9	9.49	7.96	0.56	0.31	T	T	3.28e-05	0.0019	Multiple_Complex
TC1100011091.hg.1	beta-1,3-glucuronyltransferase 3	B3GAT3	2.9	7.37	5.84	0.42	0.06	T	T	5.32e-07	6.31e-05	Multiple_Complex
TC2200009356.hg.1	ADP-ribosylation factor GTPase activating protein 3	ARFGAP3	2.89	11.24	9.71	0.55	0.91	T	T	3.26e-05	0.0019	Multiple_Complex
TC0300012245.hg.1	zinc finger protein 148	ZNF148	2.89	12.63	11.1	0.44	0.69	T	T	0.0018	0.044	Multiple_Complex
TC1700010534.hg.1	chromosome 17 open reading frame 96	C17orf96	2.89	4.92	3.39	0.38	0.12	T	F	3.62e-05	0.0021	Multiple_Complex
TC1200011526.hg.1	uncharacterized LOC643339; Salzman2013 ANNOTATED, ncRNA, OVERLAPTX, OVEXON best transcript NR_040096; novel transcript, antisense to novel protein; novel transcript, antisense to NUDT4	LOC643339; RP11-511B23.2; RP11-486A14.2	2.88	6.11	4.58	0.6	0.3	T	F	8.88e-05	0.0043	Multiple_Complex
TC0100013076.hg.1	peptidyl arginine deiminase, type II	PADI2	2.88	9.02	7.49	0.29	0.32	T	T	0.0001	0.0057	Multiple_Complex
TC1100013226.hg.1	ALG9, alpha-1,2-mannosyltransferase	ALG9	2.88	9.64	8.12	0.29	0.26	T	T	6.31e-07	7.24e-05	Multiple_Complex
TC0400009223.hg.1	carboxypeptidase E	CPE	2.88	12.38	10.86	0.67	0.1	T	T	0.0173	0.2037	Coding
TC0100013924.hg.1	ELOVL fatty acid elongase 1; microRNA 6734	ELOVL1; MIR6734	2.88	10.9	9.37	0.46	0.59	T	T	0.0009	0.0262	Multiple_Complex
TC0900007333.hg.1	family with sequence similarity 27, member E3	FAM27E3	2.88	7.89	6.37	0.27	0.42	T	T	0.0002	0.0081	Multiple_Complex
TC0500009766.hg.1	novel transcript	CTC-338M12.9	2.88	12.25	10.72	0.31	0.43	T	T	0.0022	0.0517	Multiple_Complex
TC1200007145.hg.1		RP11-582E3.4	2.88	10.08	8.55	0.64	0.74	T	T	0.0001	0.0048	Multiple_Complex
TC1500010764.hg.1	CDC like kinase 3	CLK3	2.87	11.89	10.37	0.64	0.74	T	T	0.0002	0.0065	Multiple_Complex
TC0900008869.hg.1	outer dense fiber of sperm tails 2	ODF2	2.87	12.79	11.27	0.4	0.95	T	T	1.1e-05	0.0008	Multiple_Complex
TC1400009524.hg.1	ZFP36 ring finger protein-like 1	ZFP36L1	2.86	14.83	13.31	0.38	0.03	T	T	1.81e-05	0.0012	Coding
TC0500009544.hg.1	msh homeobox 2	MSX2	2.86	6.34	4.83	0.35	0.12	T	T	0.0093	0.1378	Coding
TC0600010070.hg.1	calcineurin-like EF-hand protein 1 pseudogene	LOC729603	2.86	6.36	4.84	0.44	0.13	T	T	2.35e-06	0.0002	Multiple_Complex
TC0100009645.hg.1	Uncharacterized protein [Source:UniProtKB/TrEMBL;Acc:A0A096LNW5]	AC253572.1	2.86	9.63	8.12	0.36	0.75	T	T	2.56e-06	0.0002	Coding
TC0900007082.hg.1	RUN and SH3 domain containing 2	RUSC2	2.86	6.79	5.27	0.05	0.38	T	T	0.0004	0.0132	Multiple_Complex
TC1700007899.hg.1	MLX, MAX dimerization protein	MLX	2.86	10.28	8.77	0.22	0.2	T	T	1.39e-05	0.0009	Multiple_Complex
TC1500009904.hg.1	transducin-like enhancer of split 3	TLE3	2.86	11.97	10.46	0.55	0.3	T	T	0.0009	0.0255	Multiple_Complex
TC1600008898.hg.1	VPS9D1 antisense RNA 1	VPS9D1-AS1	2.85	7.92	6.41	0.84	0.12	T	T	0.0059	0.1018	Multiple_Complex
TC1200012181.hg.1	signal peptide peptidase like 3	SPPL3	2.85	12.66	11.15	0.32	0.38	T	T	0.0043	0.0817	Multiple_Complex
TC0300007445.hg.1	glutamate receptor, metabotropic 2	GRM2	2.85	6.18	4.66	0.78	0.78	T	T	0.0007	0.0216	Multiple_Complex
TC0700011562.hg.1	transmembrane protein 120A	TMEM120A	2.85	10.05	8.54	0.87	0.52	T	T	0.0011	0.0296	Multiple_Complex
TC0800012299.hg.1	hook microtubule-tethering protein 3	HOOK3	2.85	10.89	9.38	0.39	0.25	T	T	0.0035	0.0717	Multiple_Complex
TC0100013552.hg.1	small nucleolar RNA, C/D box 103C	SNORD103C	2.84	7.43	5.92	0.2	0.49	T	T	8.29e-06	0.0006	Multiple_Complex
TC1700008005.hg.1	frizzled class receptor 2	FZD2	2.84	8.23	6.72	0.96	0.29	T	T	8.59e-05	0.0041	Coding
TC1100008999.hg.1	zinc finger CCCH-type containing 12C	ZC3H12C	2.84	7.97	6.47	0.54	0.5	T	T	0.0011	0.0305	Multiple_Complex
TC0500013351.hg.1	folliculin interacting protein 1	FNIP1	2.84	10.49	8.98	0.38	0.47	T	T	0.0037	0.0733	Multiple_Complex
TC0200012082.hg.1	intraflagellar transport 172	IFT172	2.84	9.73	8.23	0.1	0.85	T	T	0.0002	0.0067	Multiple_Complex
TC1500008317.hg.1	CREB regulated transcription coactivator 3	CRTC3	2.83	9.7	8.2	0.26	0.43	T	T	0.0001	0.0053	Multiple_Complex
TC0200014246.hg.1	POTE ankyrin domain family, member F	POTEF	2.83	10.96	9.46	0.14	0.47	T	T	0.0003	0.0112	Multiple_Complex
TC1400006962.hg.1		RP11-545M17.2	2.83	5.24	3.74	0.15	0.51	T	T	0.0006	0.0184	Multiple_Complex
TC0100013049.hg.1	neuroblastoma breakpoint family, member 1	NBPF1	2.83	10.03	8.53	0.56	0.51	T	T	0.0046	0.0855	Multiple_Complex
TC1200007709.hg.1	prefoldin subunit 5	PFDN5	2.83	14.07	12.57	0.21	0.52	T	T	0.0006	0.0195	Multiple_Complex
TC1300007312.hg.1	protocadherin 17	PCDH17	2.82	8.06	6.56	0.32	0.45	T	T	0.003	0.0634	Coding
TC0700009594.hg.1	RNA, Ro-associated Y5	RNY5	2.82	11.19	9.69	0.28	0.15	T	T	0.0014	0.0361	Multiple_Complex
TC1400010041.hg.1	interferon, alpha-inducible protein 27-like 2	IFI27L2	2.82	12.55	11.06	0.27	0.17	T	T	5.88e-07	6.87e-05	Multiple_Complex
TC1700012228.hg.1	leucine rich repeat containing 37B	LRRC37B	2.82	10.97	9.48	0.48	0.48	T	T	0.0002	0.0086	Multiple_Complex
TC0100014846.hg.1	general transcription factor IIB	GTF2B	2.82	11.72	10.22	0.07	0.53	T	T	9.03e-05	0.0043	Multiple_Complex
TC0600012885.hg.1	laminin, alpha 4	LAMA4	2.82	7.33	5.84	0.21	0.12	T	T	0.0004	0.0139	Multiple_Complex
TC0900008945.hg.1	G protein-coupled receptor 107	GPR107	2.82	12.78	11.28	0.5	0.03	T	T	1.24e-06	0.0001	Multiple_Complex
TC1900009192.hg.1	abhydrolase domain containing 17A	ABHD17A	2.82	7.26	5.76	0.57	0.3	T	T	8.95e-05	0.0043	Multiple_Complex
TC1100010753.hg.1	C1q and tumor necrosis factor related protein 4	C1QTNF4	2.82	6.53	5.04	0.37	0.1	T	T	6.9e-06	0.0005	Coding
TC0900009933.hg.1	family with sequence similarity 214, member B	FAM214B	2.82	7.29	5.8	0.67	0.57	T	T	0.0001	0.0054	Multiple_Complex
TC1800008655.hg.1	dymeclin	DYM	2.82	14.44	12.95	0.26	0.39	T	T	1.47e-05	0.001	Multiple_Complex
TC0900008497.hg.1	zinc finger protein 618	ZNF618	2.81	9.67	8.18	0.17	0.13	T	T	9.45e-05	0.0045	Multiple_Complex
TC0500010842.hg.1	phosphodiesterase 4D, cAMP-specific	PDE4D	2.81	6.68	5.19	0.24	0.55	T	T	0.0047	0.0875	Multiple_Complex
TC0400011298.hg.1	nucleosome assembly protein 1-like 5	NAP1L5	2.81	5.32	3.83	0.12	0.81	T	T	0.0034	0.0703	Coding
TC0100010939.hg.1	phospholipase A2, group IVA (cytosolic, calcium-dependent)	PLA2G4A	2.81	7.2	5.71	0.23	0.36	T	T	0.0082	0.1274	Multiple_Complex
TC0600008099.hg.1	polymerase (DNA directed), eta	POLH	2.81	8.57	7.08	0.47	0.83	T	T	0.0005	0.0162	Multiple_Complex
TC0700013389.hg.1	stromal antigen 3-like 1 (pseudogene) [Source:HGNC Symbol;Acc:HGNC:33852]	STAG3L1	2.81	7.85	6.36	0.11	0.18	T	T	4.65e-07	5.61e-05	Multiple_Complex
TC1100012488.hg.1	intraflagellar transport 46	IFT46	2.8	11.45	9.96	0.39	0.62	T	T	0.0034	0.0698	Multiple_Complex
TC0100015572.hg.1	SLIT-ROBO Rho GTPase activating protein 2B	SRGAP2B	2.8	13.14	11.65	0.19	0.26	T	T	4.53e-05	0.0025	Multiple_Complex
TC1900011640.hg.1	ephrin-A2	EFNA2	2.8	7.59	6.1	0.73	0.74	T	T	0.0011	0.0309	Multiple_Complex
TC1200010866.hg.1	CD63 molecule	CD63	2.8	14.73	13.24	0.4	0.22	T	T	6.48e-06	0.0005	Multiple_Complex
TC0200007401.hg.1	dynein, cytoplasmic 2, light intermediate chain 1	DYNC2LI1	2.8	9.1	7.62	0.24	0.5	T	T	0.0131	0.1718	Multiple_Complex
TC0200009331.hg.1	POTE ankyrin domain family, member E	POTEE	2.8	10.84	9.35	0.07	0.36	T	T	4.88e-06	0.0004	Coding
TC0300013888.hg.1	TSC22 domain family, member 2	TSC22D2	2.8	13.25	11.77	0.13	0.04	T	T	0.0003	0.011	Multiple_Complex
TC0200007049.hg.1	transmembrane protein 214	TMEM214	2.8	11.98	10.49	0.77	0.7	T	T	0.0007	0.0206	Multiple_Complex
TC0X00007707.hg.1	ATPase, Cu++ transporting, alpha polypeptide	ATP7A	2.8	7.5	6.02	0.31	0.57	T	T	0.0005	0.0156	Multiple_Complex
TC0500013242.hg.1	protocadherin beta 6	PCDHB6	2.79	8.15	6.67	0.37	0.52	T	T	0.01	0.1451	Coding
TC0X00006581.hg.1	transducin (beta)-like 1X-linked	TBL1X	2.79	12.44	10.96	0.27	0.24	T	T	3.32e-05	0.0019	Multiple_Complex
TC2200008135.hg.1	zinc finger protein 280A	ZNF280A	2.79	6.04	4.56	0.7	0.16	T	T	0.0078	0.1229	Multiple_Complex
TC0400008945.hg.1	general transcription factor IIF subunit 2 pseudogene 1 [Source:HGNC Symbol;Acc:HGNC:4654]	GTF2F2P1	2.79	7.54	6.06	0.16	0.19	T	T	0.0019	0.0458	Multiple_Complex
TC1000008942.hg.1	transcription factor 7-like 2 (T-cell specific, HMG-box)	TCF7L2	2.79	11	9.52	0.63	0.5	T	T	0.0297	0.2777	Multiple_Complex
TC1200012579.hg.1	neurotrophin 3	NTF3	2.79	5.74	4.26	0.5	0.04	T	F	0.005	0.0908	Multiple_Complex
TC1000007761.hg.1	AT rich interactive domain 5B (MRF1-like)	ARID5B	2.79	7.95	6.48	0.26	0.52	T	T	0.0102	0.147	Multiple_Complex
TC2200007398.hg.1	synaptogyrin 1	SYNGR1	2.78	11.84	10.36	0.3	0.34	T	T	0.0003	0.0108	Multiple_Complex
TC0X00007267.hg.1	MAGE family member D1	MAGED1	2.78	13.46	11.99	0.78	0.09	T	T	3.87e-05	0.0022	Multiple_Complex
TC0400011057.hg.1	scavenger receptor class B, member 2	SCARB2	2.78	10.35	8.88	0.49	0.3	T	T	0.0014	0.0364	Multiple_Complex
TC0100018286.hg.1	neuroblastoma breakpoint family, member 19	NBPF19	2.78	9.22	7.74	0.52	0.52	T	T	3.49e-05	0.002	Coding
TC0500007641.hg.1	phosphoinositide-3-kinase, regulatory subunit 1 (alpha)	PIK3R1	2.78	11.31	9.84	0.42	0.32	T	T	0.0024	0.0546	Multiple_Complex
TC0800009872.hg.1	tumor necrosis factor receptor superfamily, member 10d, decoy with truncated death domain	TNFRSF10D	2.77	10.58	9.11	0.45	1.31	T	T	0.0135	0.1749	Coding
TC0100014568.hg.1	Uncharacterized protein [Source:UniProtKB/TrEMBL;Acc:A0A096LNW0]	AL158839.1	2.77	5.51	4.04	0.77	0.58	F	F	0.0152	0.1884	Coding
TC1200008739.hg.1	transmembrane protein 263	TMEM263	2.77	9.56	8.09	0.26	0.43	T	T	0.0005	0.018	Multiple_Complex
TC0500007910.hg.1		CTC-512J14.1	2.77	8.44	6.97	0.51	0.33	T	T	0.0015	0.0392	Multiple_Complex
TC0200010796.hg.1	CTD small phosphatase 1	CTDSP1	2.77	9.45	7.98	0.64	0.38	T	T	0.0015	0.0388	Multiple_Complex
TC0500012760.hg.1	slit guidance ligand 3	SLIT3	2.76	7.67	6.21	0.53	0.48	T	T	0.0028	0.0604	Multiple_Complex
TC0300011247.hg.1	wingless-type MMTV integration site family, member 5A	WNT5A	2.76	7.55	6.08	0.27	0.6	T	T	0.0304	0.2812	Multiple_Complex
TC1700008350.hg.1	noggin	NOG	2.76	5.49	4.02	0.05	0.09	T	F	0.0003	0.0098	Coding
TC0300006790.hg.1	ribosomal protein L39 pseudogene 18	RPL39P18	2.76	9.29	7.82	0.32	0.67	T	T	0.0047	0.0876	Multiple_Complex
TC1000008716.hg.1	golgi brefeldin A resistant guanine nucleotide exchange factor 1	GBF1	2.76	13.46	12	0.83	0.17	T	T	0.0001	0.0059	Multiple_Complex
TC0100009721.hg.1		RP3-365I19.2	2.76	8.6	7.13	0.63	0.48	T	T	0.0017	0.0425	Multiple_Complex
TC0100007532.hg.1	syntaxin 12	STX12	2.76	10.05	8.59	0.11	0.38	T	T	0.0002	0.0068	Multiple_Complex
TC1600010902.hg.1	ribosomal protein L18 pseudogene 13	RPL18P13	2.75	11.54	10.08	0.27	0.7	T	T	0.0266	0.2614	Multiple_Complex
TC0200014164.hg.1	cytochrome P450, family 27, subfamily C, polypeptide 1	CYP27C1	2.75	7.39	5.93	0.52	0.4	T	T	0.0002	0.0077	Coding
TC0400008213.hg.1	RAP1, GTP-GDP dissociation stimulator 1	RAP1GDS1	2.75	8.87	7.41	0.55	0.46	T	T	3.15e-05	0.0018	Multiple_Complex
TC1500007644.hg.1	chromosome 15 open reading frame 61	C15orf61	2.75	6.42	4.96	0.43	0.22	T	F	0.0002	0.0072	Multiple_Complex
TC0400011234.hg.1	mitogen-activated protein kinase 10	MAPK10	2.75	9.02	7.56	0.33	1.25	T	T	0.0108	0.1522	Multiple_Complex
TC0600014366.hg.1	phosphodiesterase 10A	PDE10A	2.74	6.17	4.71	0.38	0.5	T	T	0.0101	0.1459	Multiple_Complex
TC0300011584.hg.1		RP11-803B1.3	2.74	7.65	6.19	0.81	0.02	T	T	0.0094	0.1397	Multiple_Complex
TC1200006654.hg.1	atrophin 1	ATN1	2.74	10.42	8.96	0.58	0.44	T	T	2.54e-06	0.0002	Multiple_Complex
TC2100007663.hg.1	BTG family, member 3	BTG3	2.74	11.71	10.26	0.45	0.11	T	T	1.86e-06	0.0002	Multiple_Complex
TC1100008236.hg.1	cyclin D1	CCND1	2.74	13.51	12.06	0.32	0.18	T	T	2.03e-05	0.0013	Multiple_Complex
TC1600007485.hg.1	fibrosin	FBRS	2.74	6.15	4.7	0.73	0.24	T	T	0.0004	0.0138	Multiple_Complex
TC1700008189.hg.1		RP11-501C14.7	2.74	9.23	7.78	0.55	0.78	T	T	0.0004	0.0129	Multiple_Complex
TC2100007821.hg.1	ADAM metallopeptidase with thrombospondin type 1 motif 1	ADAMTS1	2.74	9.77	8.32	0.11	0.57	T	T	0.0021	0.0486	Multiple_Complex
TC0600009264.hg.1		RP11-632C17__A.1	2.73	11.67	10.22	0.38	0.15	T	T	0.001	0.0288	Multiple_Complex
TC0X00009780.hg.1	FYVE, RhoGEF and PH domain containing 1	FGD1	2.73	12.24	10.79	0.29	0.7	T	T	0.0003	0.0112	Multiple_Complex
TC0100010887.hg.1	chromosome 1 open reading frame 21	C1orf21	2.73	13.37	11.92	0.08	0.41	T	T	0.0002	0.008	Multiple_Complex
TC0700010926.hg.1	transmembrane p24 trafficking protein 4	TMED4	2.73	10.41	8.96	0.12	0.6	T	T	0.0029	0.0621	Multiple_Complex
TC1500008511.hg.1	leucine rich repeat containing 28	LRRC28	2.73	12.95	11.5	0.22	0.32	T	T	6.75e-05	0.0034	Multiple_Complex
TC0200015564.hg.1		AC093698.1	2.73	8.51	7.07	0.29	0.24	T	T	0.001	0.0283	Multiple_Complex
TC2200008482.hg.1	eukaryotic translation initiation factor 4E nuclear import factor 1	EIF4ENIF1	2.73	10.56	9.11	0.23	0.45	T	T	9.5e-06	0.0007	Multiple_Complex
TC1200007615.hg.1	disco-interacting protein 2 homolog B	DIP2B	2.73	14.9	13.45	0.09	0.22	T	T	3.76e-07	4.7e-05	Multiple_Complex
TC1800007101.hg.1	KIAA1328	KIAA1328	2.73	8.99	7.54	0.37	0.29	T	T	4.53e-05	0.0025	Multiple_Complex
TC0X00007378.hg.1	MAGE family member H1	MAGEH1	2.72	9.25	7.81	0.8	0.11	T	T	6.17e-05	0.0032	Coding
TC0500010924.hg.1	ADAM metallopeptidase with thrombospondin type 1 motif 6	ADAMTS6	2.72	6.89	5.45	0.61	0.25	T	F	4.45e-06	0.0004	Multiple_Complex
TC0900009687.hg.1	interferon, nu 1, pseudogene [Source:HGNC Symbol;Acc:HGNC:32009]	IFNNP1	2.72	6.13	4.69	0.4	0.44	T	F	0.0021	0.0489	Multiple_Complex
TC1600011572.hg.1	chromosome 16 open reading frame 46	C16orf46	2.72	7.1	5.65	0.25	0.87	T	T	2.54e-05	0.0015	Multiple_Complex
TC1600011417.hg.1	nuclear factor of activated T-cells, cytoplasmic, calcineurin-dependent 3	NFATC3	2.72	14.68	13.23	0.26	0.33	T	T	2.41e-05	0.0015	Multiple_Complex
TC0100018476.hg.1	peroxisomal biogenesis factor 11 beta	PEX11B	2.72	10.95	9.51	0.2	0.33	T	T	5.77e-08	9.58e-06	Multiple_Complex
TC0X00008081.hg.1	autophagy related 4A, cysteine peptidase	ATG4A	2.71	9.7	8.26	0.2	0.73	T	T	1.43e-05	0.001	Multiple_Complex
TC1500007814.hg.1	neogenin 1	NEO1	2.71	14.62	13.18	0.16	0.37	T	T	0.0008	0.0249	Multiple_Complex
TC1000011989.hg.1	small nucleolar RNA, H/ACA box 19	SNORA19	2.71	8.93	7.49	0.19	0.36	T	T	0.0017	0.0427	Multiple_Complex
TC1300008938.hg.1	deleted in lymphocytic leukemia 2 (non-protein coding); microRNA 15a; microRNA 16-1; microRNA 3613	DLEU2; MIR15A; MIR16-1; MIR3613	2.7	9.18	7.75	0.89	0.62	T	T	0.002	0.0481	Multiple_Complex
TC1100008525.hg.1	myosin VIIA	MYO7A	2.7	6.69	5.26	0.64	0.05	T	T	2.86e-05	0.0017	Multiple_Complex
TC0X00008798.hg.1	signal sequence receptor, delta	SSR4	2.7	12.22	10.78	0.26	0.85	T	T	0.0056	0.098	Multiple_Complex
TC0500007452.hg.1	mitogen-activated protein kinase kinase kinase 1, E3 ubiquitin protein ligase	MAP3K1	2.7	10.88	9.45	0.53	0.5	T	T	0.0075	0.1196	Multiple_Complex
TC0600011457.hg.1	LSM2 homolog, U6 small nuclear RNA and mRNA degradation associated	LSM2	2.7	13.07	11.64	0.45	0.53	T	T	0.0008	0.024	Multiple_Complex
TC0600007610.hg.1	mutS homolog 5; MSH5-SAPCD1 readthrough (NMD candidate); suppressor APC domain containing 1	MSH5; MSH5-SAPCD1; SAPCD1	2.7	9.89	8.46	0.25	0.31	T	T	0.0007	0.022	Multiple_Complex
TC1400007558.hg.1	sushi domain containing 6	SUSD6	2.7	7.04	5.6	0.15	0.25	T	T	4.68e-07	5.63e-05	Multiple_Complex
TC1600006439.hg.1	N-methylpurine DNA glycosylase	MPG	2.7	7.06	5.63	0.22	0.04	T	T	4.3e-05	0.0024	Multiple_Complex
TC1200007652.hg.1	GRP1 (general receptor for phosphoinositides 1)-associated scaffold protein	GRASP	2.69	8.34	6.91	0.82	0.52	T	T	2.9e-05	0.0017	Multiple_Complex
TC0200011743.hg.1	uncharacterized LOC285150; uncharacterized LOC285150 [Source:EntrezGene;Acc:285150]; novel transcript	FLJ33534; AC062028.1	2.69	6.58	5.15	0.52	0.59	T	T	0.0029	0.0617	Multiple_Complex
TC0700013510.hg.1	KDEL (Lys-Asp-Glu-Leu) endoplasmic reticulum protein retention receptor 2	KDELR2	2.69	16.04	14.61	0.68	0.56	T	T	0.0001	0.0059	Multiple_Complex
TC1200012764.hg.1	proline-rich protein HaeIII subfamily 1; taste receptor, type 2, member 14; proline rich 4 (lacrimal)	PRH1; TAS2R14; PRR4	2.69	10.82	9.39	0.31	0.24	T	T	0.0009	0.0255	Multiple_Complex
TC1300007187.hg.1	tripartite motif containing 13; potassium channel regulator	TRIM13; KCNRG	2.69	12.02	10.6	0.25	1.14	T	T	0.0007	0.0222	Multiple_Complex
TC0700008072.hg.1	rhomboid domain containing 2	RHBDD2	2.69	8.18	6.76	1.12	0.62	T	T	0.0066	0.1105	Multiple_Complex
TC0400010418.hg.1	RELT-like 1	RELL1	2.69	13.2	11.78	0.51	0.26	T	T	2.25e-05	0.0014	Multiple_Complex
TC1600010363.hg.1	iroquois homeobox 3	IRX3	2.68	5.26	3.84	0.67	0.28	T	F	0.0123	0.1656	Multiple_Complex
TC1700006763.hg.1	ATPase, Na+/K+ transporting, beta 2 polypeptide	ATP1B2	2.68	10.74	9.32	0.79	0.3	T	T	0.0183	0.2105	Multiple_Complex
TC1200008731.hg.1	regulatory factor X, 4 (influences HLA class II expression)	RFX4	2.68	7.46	6.03	0.11	0.28	T	T	0.0361	0.3093	Multiple_Complex
TC0X00008850.hg.1		AF277315.19	2.68	10.29	8.86	0.44	0.26	T	T	0.0004	0.0141	Multiple_Complex
TC0100007567.hg.1	RNA, U11 small nuclear	RNU11	2.68	9.03	7.61	0.78	0.34	T	T	0.0008	0.024	Multiple_Complex
TC1100008788.hg.1	small Cajal body-specific RNA 9	SCARNA9	2.68	12.47	11.05	0.06	0.43	T	T	0.0058	0.1011	Multiple_Complex
TC0100010067.hg.1		AL590431.1	2.67	10.69	9.28	0.27	0.43	T	T	0.0085	0.1303	Multiple_Complex
TC1500009636.hg.1	annexin A2	ANXA2	2.67	15.87	14.45	0.84	0.19	T	T	0.0072	0.1165	Multiple_Complex
TC2200008576.hg.1	RNA binding protein, fox-1 homolog (C. elegans) 2	RBFOX2	2.67	13.88	12.46	0.21	0.32	T	T	1.99e-06	0.0002	Multiple_Complex
TC1400008683.hg.1	RNA binding motif protein 23	RBM23	2.67	12.51	11.1	0.5	0.09	T	T	0.0026	0.0575	Multiple_Complex
TC0300013834.hg.1	RAD54-like 2 (S. cerevisiae)	RAD54L2	2.67	10.61	9.2	0.26	0.28	T	T	9.76e-05	0.0046	Multiple_Complex
TC0200010009.hg.1	secernin 3	SCRN3	2.67	9.25	7.84	0.34	0.6	T	T	0.0016	0.0405	Multiple_Complex
TC0200010275.hg.1	glutaminase	GLS	2.66	12.31	10.9	0.07	0.51	T	T	0.0444	0.344	Multiple_Complex
TC1000011669.hg.1	LIM domain binding 1	LDB1	2.66	16.17	14.75	0.04	0.04	T	T	3.97e-06	0.0003	Multiple_Complex
TC1600010409.hg.1	Bardet-Biedl syndrome 2	BBS2	2.66	9.88	8.47	0.5	0.35	T	T	0.0124	0.1663	Multiple_Complex
TC1300009165.hg.1	protocadherin 9	PCDH9	2.66	5.14	3.73	0.49	0.29	T	F	9.04e-05	0.0043	Multiple_Complex
TC1500010093.hg.1	electron-transfer-flavoprotein, alpha polypeptide	ETFA	2.66	12.87	11.46	0.23	0.16	T	T	0.0003	0.0125	Multiple_Complex
TC1100006932.hg.1	inscuteable homolog (Drosophila)	INSC	2.66	4.84	3.43	0.9	0.27	T	F	0.0081	0.1257	Multiple_Complex
TC1000010844.hg.1	RUN and FYVE domain containing 2	RUFY2	2.66	11.56	10.15	0.25	0.76	T	T	0.0293	0.2757	Multiple_Complex
TC1900011766.hg.1	MAP/microtubule affinity-regulating kinase 4	MARK4	2.66	12.84	11.43	0.63	0.51	T	T	5.31e-05	0.0028	Multiple_Complex
TC0300013978.hg.1	ubiquitin specific peptidase 4 (proto-oncogene)	USP4	2.65	10.69	9.28	0.43	0.59	T	T	3.57e-05	0.0021	Multiple_Complex
TC0500007303.hg.1	nicotinamide nucleotide transhydrogenase	NNT	2.65	11.14	9.73	0.81	0.15	T	T	7.95e-05	0.0039	Multiple_Complex
TC1400009922.hg.1	protein tyrosine phosphatase, non-receptor type 21	PTPN21	2.65	9.59	8.18	0.46	0.71	T	T	5.38e-05	0.0028	Multiple_Complex
TC1500007645.hg.1	mitogen-activated protein kinase kinase 5	MAP2K5	2.65	8.46	7.06	0.77	0.29	T	T	0.0004	0.0141	Multiple_Complex
TC0700009688.hg.1	nitric oxide synthase 3 (endothelial cell)	NOS3	2.64	5.66	4.25	0.68	0.27	T	T	0.0002	0.0068	Multiple_Complex
TC0200013541.hg.1	sema domain, immunoglobulin domain (Ig), transmembrane domain (TM) and short cytoplasmic domain, (semaphorin) 4C	SEMA4C	2.64	8.93	7.53	0.26	0.05	T	T	0.0002	0.007	Multiple_Complex
TC0700012115.hg.1	N-acyl phosphatidylethanolamine phospholipase D	NAPEPLD	2.64	9.7	8.3	0.54	0.61	T	T	0.0009	0.0272	Multiple_Complex
TC1200006656.hg.1	chromosome 12 open reading frame 57; RNA, U7 small nuclear 1	C12orf57; RNU7-1	2.64	13.75	12.35	0.56	0.35	T	T	6.63e-05	0.0034	Multiple_Complex
TC1200010690.hg.1	cysteine-serine-rich nuclear protein 2	CSRNP2	2.64	9.4	8	0.27	0.58	T	T	0.0002	0.0076	Multiple_Complex
TC2200007526.hg.1	RNA, U12 small nuclear	RNU12	2.63	8.78	7.38	1	0.14	T	T	0.0044	0.0835	Multiple_Complex
TC0100015309.hg.1		RP3-522D1.2	2.63	12.73	11.33	0.31	0.51	T	T	0.0012	0.0321	Multiple_Complex
TC1500010613.hg.1	tetratricopeptide repeat domain 23	TTC23	2.63	10.98	9.59	0.43	0.4	T	T	4.4e-05	0.0024	Multiple_Complex
TC0800007704.hg.1	ribosomal protein L37 pseudogene 6 [Source:HGNC Symbol;Acc:HGNC:31080]	RPL37P6	2.63	15.89	14.5	0.11	0.08	T	T	1.09e-06	0.0001	Multiple_Complex
TC0800007127.hg.1	elongator acetyltransferase complex subunit 3	ELP3	2.63	13.82	12.42	0.11	0.22	T	T	0.0001	0.0055	Multiple_Complex
TC1800008338.hg.1	potassium channel tetramerization domain containing 1	KCTD1	2.63	9.62	8.23	0.26	0.11	T	T	1.16e-05	0.0008	Multiple_Complex
TC0900007341.hg.1		RP11-111F5.2	2.62	5.75	4.36	0.76	0.48	T	T	0.0047	0.0876	Multiple_Complex
TC0X00008832.hg.1	GDP dissociation inhibitor 1	GDI1	2.62	14.63	13.24	0.36	0.16	T	T	2.25e-06	0.0002	Multiple_Complex
TC0100013550.hg.1	Homo sapiens small nucleolar RNA, C/D box 103A (SNORD103A), small nucleolar RNA.; Homo sapiens small nucleolar RNA, C/D box 103B (SNORD103B), small nucleolar RNA.	SNORD103A; SNORD103B	2.62	7.11	5.72	0.47	0.04	T	T	0.0003	0.0123	Multiple_Complex
TC0100012788.hg.1	G protein-coupled receptor 157	GPR157	2.62	8.42	7.03	0.47	0.22	T	T	0.0004	0.0154	Multiple_Complex
TC0900011626.hg.1	CDKN1A interacting zinc finger protein 1	CIZ1	2.62	14.12	12.73	0.35	0.2	T	T	0.0004	0.0139	Multiple_Complex
TC1100013205.hg.1	ArfGAP with RhoGAP domain, ankyrin repeat and PH domain 1	ARAP1	2.62	8.43	7.04	0.22	0.22	T	T	0.0001	0.0065	Multiple_Complex
TC0200016532.hg.1	uncharacterized LOC440910	LOC440910	2.62	6.62	5.23	0.19	0.35	T	T	0.0027	0.0596	Multiple_Complex
TC1700011074.hg.1	distal-less homeobox 3	DLX3	2.62	5.15	3.77	0.59	0.18	T	F	0.0013	0.0341	Coding
TC1000011323.hg.1	glutamate dehydrogenase 1	GLUD1	2.61	15.17	13.78	0.33	0.27	T	T	7.88e-06	0.0006	Multiple_Complex
TC0400007749.hg.1	UDP glucuronosyltransferase 2 family, polypeptide B7	UGT2B7	2.61	5.71	4.32	0.24	0.12	T	F	6.18e-06	0.0005	Multiple_Complex
TC0300006758.hg.1	phospholipase C-like 2; microRNA 3714	PLCL2; MIR3714	2.61	8.78	7.4	0.26	0.32	T	T	0.0032	0.0668	Multiple_Complex
TC1700007716.hg.1	myeloid/lymphoid or mixed-lineage leukemia; translocated to, 6	MLLT6	2.61	6.36	4.98	0.08	0.63	T	T	0.0025	0.0565	Multiple_Complex
TC1500006599.hg.1	small nucleolar RNA, C/D box 115-24	SNORD115-24	2.61	7.98	6.6	0.73	0.18	T	T	0.0001	0.006	Multiple_Complex
TC1000010716.hg.1	family with sequence similarity 13, member C	FAM13C	2.6	6.85	5.47	0.16	0.44	T	T	0.0016	0.0414	Multiple_Complex
TC1200009036.hg.1	F-box and WD repeat domain containing 8	FBXW8	2.6	12	10.63	0.48	0.53	T	T	1.72e-05	0.0011	Multiple_Complex
TC2000008130.hg.1	TBC1 domain family, member 20	TBC1D20	2.6	10.38	9.01	0.32	0.72	T	T	1.54e-05	0.001	Multiple_Complex
TC1200011067.hg.1	dpy-19-like 2 (C. elegans)	DPY19L2	2.6	8.46	7.09	0.56	0.8	T	T	0.0017	0.0427	Multiple_Complex
TC0100014050.hg.1	leucine rich repeat containing 41	LRRC41	2.6	12.53	11.16	0.05	0.14	T	T	0.0003	0.012	Multiple_Complex
TC1700010001.hg.1	small nucleolar RNA, C/D box 3D	SNORD3D	2.6	13.82	12.45	1.29	0.51	T	T	0.0397	0.3247	Multiple_Complex
TC0600013001.hg.1	centrosomal protein 85kDa-like	CEP85L	2.59	8.21	6.83	0.05	0.79	T	T	0.0177	0.2061	Multiple_Complex
TC2200008055.hg.1	phosphatidylinositol 4-kinase, catalytic, alpha	PI4KA	2.59	12.82	11.45	0.3	0.49	T	T	0.0084	0.129	Multiple_Complex
TC0600012840.hg.1		RP11-569A2.2	2.59	10.38	9.01	0.08	0.1	T	T	9.76e-07	0.0001	Multiple_Complex
TC1500010909.hg.1	StAR-related lipid transfer domain containing 5	STARD5	2.59	8.63	7.25	0.59	0.33	T	T	0.0008	0.0245	Multiple_Complex
TC0900011452.hg.1	small nucleolar RNA, C/D box 90	SNORD90	2.59	9.02	7.64	0.32	0.29	T	T	0.0003	0.0111	Multiple_Complex
TC0800010685.hg.1	v-myb avian myeloblastosis viral oncogene homolog-like 1	MYBL1	2.59	8.15	6.78	0.27	0.63	T	T	0.0028	0.0613	Multiple_Complex
TC0200009967.hg.1	distal-less homeobox 1	DLX1	2.59	5.4	4.03	1.54	0.11	T	T	0.0049	0.0903	Multiple_Complex
TC0300011628.hg.1	roundabout guidance receptor 1	ROBO1	2.58	15.2	13.83	0.25	0.26	T	T	0.0074	0.1183	Multiple_Complex
TC1200007887.hg.1	methyl-CpG binding domain protein 6	MBD6	2.58	8.42	7.05	0.3	0.09	T	T	0.0002	0.0072	Multiple_Complex
TC0200011990.hg.1	peptidyl-tRNA hydrolase domain containing 1	PTRHD1	2.58	13.53	12.16	0.2	0.44	T	T	0.0018	0.0438	Multiple_Complex
TC1400008715.hg.1	embryonal Fyn-associated substrate	EFS	2.58	6.52	5.15	0.39	0.18	T	T	0.0002	0.008	Coding
TC1900011958.hg.1	Ets2 repressor factor	ERF	2.58	10.97	9.6	0.34	0.28	T	T	0.0092	0.1372	Multiple_Complex
TC0X00009255.hg.1	ribosomal protein L9 pseudogene 7	RPL9P7	2.58	14.94	13.57	0.36	0.21	T	T	0.0007	0.0207	Multiple_Complex
TC0300007512.hg.1	protein kinase C, delta	PRKCD	2.58	10.41	9.05	0.19	0.11	T	T	1.81e-05	0.0012	Multiple_Complex
TC1100011282.hg.1	CD248 molecule, endosialin	CD248	2.57	8.89	7.53	0.22	0.3	T	T	0.0002	0.0089	Coding
TC1200012808.hg.1	R3H domain containing 2	R3HDM2	2.57	11.75	10.39	0.22	0.12	T	T	0.0014	0.036	Multiple_Complex
TC1700012310.hg.1	major facilitator superfamily domain containing 11	MFSD11	2.57	10.99	9.63	0.41	0.47	T	T	0.0002	0.0066	Multiple_Complex
TC1800007797.hg.1	ATPase, class II, type 9B	ATP9B	2.57	11.48	10.13	0.17	0.31	T	T	9.34e-05	0.0044	Multiple_Complex
TC0200016646.hg.1	mediator of cell motility 1	MEMO1	2.57	12.25	10.89	0.32	0.28	T	T	0.0002	0.0083	Multiple_Complex
TC1100011029.hg.1	von Willebrand factor C and EGF domains	VWCE	2.56	7.22	5.87	1.18	0.43	T	T	0.013	0.1706	Multiple_Complex
TC1400006656.hg.1	oxidase (cytochrome c) assembly 1-like	OXA1L	2.56	15.79	14.43	0.2	0.52	T	T	7.62e-05	0.0038	Multiple_Complex
TC1900011061.hg.1	caspase recruitment domain family, member 8	CARD8	2.56	10.55	9.19	0.32	0.41	T	T	1.43e-05	0.001	Multiple_Complex
TC1900009240.hg.1	guanine nucleotide binding protein (G protein), gamma 7	GNG7	2.56	9.79	8.43	0.65	0.37	T	T	0.0005	0.0173	Coding
TC1600008141.hg.1	core-binding factor, beta subunit	CBFB	2.56	13.91	12.56	0.58	0.44	T	T	8.57e-05	0.0041	Multiple_Complex
TC1700012345.hg.1	CTD nuclear envelope phosphatase 1	CTDNEP1	2.56	12.11	10.75	0.27	0.3	T	T	1.96e-05	0.0012	Multiple_Complex
TC0100013445.hg.1	interferon, alpha-inducible protein 6	IFI6	2.56	10.17	8.82	0.24	0.18	T	T	0.0209	0.2274	Multiple_Complex
TC0100010335.hg.1	ubiquitin specific peptidase 21	USP21	2.56	12.37	11.01	0.14	0.53	T	T	0.005	0.0911	Multiple_Complex
TC1000007552.hg.1	Jeck2013 ANNOTATED, INTERNAL, ncRNA, OVEXON best transcript TCONS_l2_00003977	TCONS_l2_00003977	2.56	16.11	14.76	0.16	0.34	T	T	1.59e-05	0.001	Multiple_Complex
TC1100007729.hg.1	deltex 4, E3 ubiquitin ligase	DTX4	2.55	8.45	7.1	0.69	0.24	T	T	0.0103	0.1479	Multiple_Complex
TC0700012995.hg.1	zinc finger protein 777	ZNF777	2.55	8.38	7.03	0.37	0.13	T	T	0.0004	0.0148	Coding
TC0200015402.hg.1	family with sequence similarity 126, member B	FAM126B	2.55	8.7	7.35	0.26	0.64	T	T	0.0013	0.0349	Multiple_Complex
TC1900006977.hg.1	intercellular adhesion molecule 1	ICAM1	2.55	9.78	8.43	1.32	0.36	T	T	0.0128	0.1698	Multiple_Complex
TC0200016447.hg.1	acylphosphatase 2, muscle type	ACYP2	2.55	6.92	5.57	0.26	0.65	T	T	0.0004	0.0129	Multiple_Complex
TC0100017097.hg.1		RP11-421E17.4	2.54	8.51	7.17	0.55	0.35	T	T	0.0009	0.0252	Multiple_Complex
TC0500013244.hg.1	protocadherin beta 16	PCDHB16	2.54	12.17	10.83	0.51	0.36	T	T	0.0004	0.0135	Coding
TC1100007467.hg.1	chromosome 11 open reading frame 49	C11orf49	2.54	11.52	10.17	0.38	0.28	T	T	0.0025	0.056	Multiple_Complex
TC1900007031.hg.1	protein kinase C substrate 80K-H	PRKCSH	2.54	16.06	14.72	0.01	0.49	T	T	0.0004	0.0134	Multiple_Complex
TC1900007360.hg.1		CTB-52I2.4	2.54	14.2	12.86	0.24	0.64	T	T	0.0001	0.0064	Multiple_Complex
TC1000008182.hg.1	zinc finger, MIZ-type containing 1	ZMIZ1	2.54	11.34	10	0.19	0.45	T	T	0.0001	0.0047	Multiple_Complex
TC1600011465.hg.1	endogenous retrovirus group K13, member 1	ERVK13-1	2.54	7.68	6.33	0.5	1.01	T	T	0.0004	0.015	Multiple_Complex
TC0100018261.hg.1	glutathione S-transferase mu 4	GSTM4	2.54	11.34	10	0.33	0.39	T	T	3.72e-05	0.0021	Multiple_Complex
TC0800011305.hg.1	neurocalcin delta	NCALD	2.53	6.42	5.08	0.87	0.72	T	T	0.0301	0.2801	Multiple_Complex
TC1900010379.hg.1	solute carrier family 7 (neutral amino acid transporter light chain, asc system), member 10	SLC7A10	2.53	7.3	5.96	0.33	0.51	T	T	0.0007	0.0211	Multiple_Complex
TC1200011099.hg.1	glucosamine (N-acetyl)-6-sulfatase	GNS	2.53	15.16	13.82	0.41	0.44	T	T	0.0002	0.0088	Multiple_Complex
TC1500009776.hg.1	RAS-like, family 12	RASL12	2.53	5.72	4.38	0.41	0.25	T	T	0.0002	0.0082	Coding
TC0100015984.hg.1	ubiquilin 4	UBQLN4	2.53	13.45	12.11	0.32	0.13	T	T	2.73e-05	0.0016	Multiple_Complex
TC1900006991.hg.1	solute carrier family 44 (choline transporter), member 2	SLC44A2	2.53	12.29	10.95	0.24	0.38	T	T	5.92e-05	0.0031	Multiple_Complex
TC1000009884.hg.1	family with sequence similarity 171, member A1	FAM171A1	2.52	11.58	10.25	0.07	0.37	T	T	0.0004	0.0154	Multiple_Complex
TC2200008609.hg.1	thioredoxin 2	TXN2	2.52	12.51	11.17	0.25	0.1	T	T	0.0015	0.0391	Multiple_Complex
TC1500006816.hg.1	piggyBac transposable element derived 4	PGBD4	2.52	6.47	5.14	0.8	0.29	T	T	0.0193	0.2175	Coding
TC1700010248.hg.1	G protein-coupled receptor kinase interacting ArfGAP 1	GIT1	2.52	13.85	12.52	0.3	0.44	T	T	0.0002	0.0066	Multiple_Complex
TC0500006748.hg.1	ribosomal protein L30 pseudogene 7 [Source:HGNC Symbol;Acc:HGNC:36402]	RPL30P7	2.52	6.96	5.63	0.25	0.61	T	T	0.033	0.2943	Multiple_Complex
TC0100007634.hg.1	zinc finger, CCHC domain containing 17	ZCCHC17	2.52	14.02	12.68	0.01	0.44	T	T	7.03e-05	0.0035	Multiple_Complex
TC2000009388.hg.1	prostaglandin I2 (prostacyclin) synthase	PTGIS	2.52	12.94	11.61	0.63	0.31	T	T	0.0017	0.0424	Multiple_Complex
TC1700010565.hg.1	F-box and leucine-rich repeat protein 20	FBXL20	2.51	10.38	9.05	0.35	0.45	T	T	5.07e-05	0.0027	Multiple_Complex
TC1000012495.hg.1	BLOC-1 related complex subunit 7	BORCS7	2.51	8.88	7.55	0.44	0.71	T	T	0.0006	0.0203	Multiple_Complex
TC0900008716.hg.1	NIMA-related kinase 6	NEK6	2.51	10.55	9.22	0.14	0.09	T	T	0.0003	0.0112	Multiple_Complex
TC1000009400.hg.1	leucine rich repeat containing 27	LRRC27	2.51	6.1	4.77	0.25	0.54	T	T	5.88e-05	0.003	Multiple_Complex
TC0600009801.hg.1	ribosomal protein S18 pseudogene 9	RPS18P9	2.5	9.12	7.8	0.2	0.56	T	T	0.0048	0.0887	Multiple_Complex
TC0100015258.hg.1	DNA-damage regulated autophagy modulator 2	DRAM2	2.5	13.73	12.41	0.37	0.08	T	T	0.0003	0.0099	Multiple_Complex
TC1400007732.hg.1	vasohibin 1	VASH1	2.5	6.84	5.52	1	0.49	T	T	0.0032	0.066	Multiple_Complex
TC2000008218.hg.1	chromosome 20 open reading frame 194	C20orf194	2.5	11.79	10.47	0.14	0.6	T	T	0.0006	0.02	Multiple_Complex
TC0800010090.hg.1		RP1-273G13.1	2.5	7.41	6.09	0.23	0.38	T	T	0.0006	0.0201	Multiple_Complex
TC0300013645.hg.1	apolipoprotein D	APOD	2.49	5.92	4.6	0.49	0.26	T	T	0.0015	0.0384	Multiple_Complex
TC1000007272.hg.1	cAMP responsive element modulator	CREM	2.49	9.74	8.43	0.64	0.43	T	T	0.0001	0.0053	Multiple_Complex
TC0300008467.hg.1	Rho GTPase activating protein 31	ARHGAP31	2.49	8.36	7.05	0.3	0.44	T	T	0.0003	0.0104	Multiple_Complex
TC0300012187.hg.1	WD repeat domain 5B	WDR5B	2.49	8.33	7.01	0.5	0.83	T	T	0.0274	0.2656	Coding
TC1500010888.hg.1	poly(ADP-ribose) polymerase family member 6	PARP6	2.49	10.01	8.69	0.26	0.16	T	T	0.0004	0.0149	Multiple_Complex
TC0200010482.hg.1	small nucleolar RNA, C/D box 11B	SNORD11B	2.49	8.66	7.34	0.72	0.5	T	T	0.0047	0.0872	Multiple_Complex
TC1700012419.hg.1	transmembrane protein 101	TMEM101	2.49	9.87	8.55	0.2	0.62	T	T	0.0002	0.0093	Multiple_Complex
TC0700011554.hg.1	PMS1 homolog 2, mismatch repair system component pseudogene 3	PMS2P3	2.49	13.38	12.07	0.17	0.41	T	T	0.0001	0.0047	Multiple_Complex
TC1200011846.hg.1	coronin, actin binding protein, 1C	CORO1C	2.49	15.19	13.87	0.22	0.61	T	T	4.2e-05	0.0023	Multiple_Complex
TC0900008641.hg.1	DAB2 interacting protein	DAB2IP	2.49	8.58	7.26	0.17	0.19	T	T	0.0024	0.0543	Multiple_Complex
TC1900011743.hg.1	transmembrane protein 91	TMEM91	2.49	6.42	5.11	1.18	0.37	T	T	0.04	0.3259	Multiple_Complex
TC2200008052.hg.1	abhydrolase domain containing 17A pseudogene P4 [Source:HGNC Symbol;Acc:HGNC:34042]	ABHD17AP4	2.49	6.6	5.28	0.42	0.81	T	T	0.012	0.1627	Multiple_Complex
TC0700013601.hg.1	RAS p21 protein activator 4B; RAS p21 protein activator 4	RASA4B; RASA4	2.48	5.92	4.61	0.46	0.31	T	T	0.0115	0.1581	Multiple_Complex
TC1100008342.hg.1	inositol polyphosphate phosphatase-like 1	INPPL1	2.48	12.2	10.89	0.17	0.29	T	T	1.28e-05	0.0009	Multiple_Complex
TC0300012498.hg.1	anaphase promoting complex subunit 13	ANAPC13	2.48	12.43	11.12	0.41	0.14	T	T	9.33e-05	0.0044	Multiple_Complex
TC0200011188.hg.1	ArfGAP with GTPase domain, ankyrin repeat and PH domain 1	AGAP1	2.48	11.93	10.62	0.22	0.26	T	T	0.0026	0.0572	Multiple_Complex
TC0300008271.hg.1	bobby sox homolog (Drosophila)	BBX	2.48	12.4	11.09	0.13	0.56	T	T	0.0352	0.3048	Multiple_Complex
TC0800011532.hg.1	trichorhinophalangeal syndrome I	TRPS1	2.48	7.33	6.02	0.34	0.29	T	T	0.0011	0.0302	Multiple_Complex
TC0600011661.hg.1	serine/threonine kinase 38	STK38	2.48	12.19	10.88	0.32	0.22	T	T	4.29e-05	0.0024	Multiple_Complex
TC0800007114.hg.1	scavenger receptor class A, member 3	SCARA3	2.47	9.73	8.42	0.1	0.25	T	T	0.0017	0.0421	Multiple_Complex
TC0500009690.hg.1	RUN and FYVE domain containing 1	RUFY1	2.47	11.12	9.81	0.16	0.17	T	T	1.33e-06	0.0001	Multiple_Complex
TC2200009262.hg.1	eukaryotic translation initiation factor 3, subunit L	EIF3L	2.47	17.27	15.96	0.1	0.25	T	T	6.25e-07	7.19e-05	Multiple_Complex
TC1700011430.hg.1	CD79b molecule, immunoglobulin-associated beta	CD79B	2.47	8.04	6.73	0.4	0.36	T	T	0.0031	0.065	Multiple_Complex
TC0X00007240.hg.1	chloride channel, voltage-sensitive 5	CLCN5	2.47	10.11	8.81	0.61	0.75	T	T	0.0024	0.0537	Multiple_Complex
TC1500010237.hg.1	ribosomal protein L9	RPL9	2.47	15.61	14.31	0.25	0.25	T	T	0.0002	0.0083	Multiple_Complex
TC0300012132.hg.1	glycogen synthase kinase 3 beta	GSK3B	2.46	14.31	13.01	0.39	0.33	T	T	0.0006	0.02	Multiple_Complex
TC2000006571.hg.1	spermine oxidase	SMOX	2.46	7.58	6.28	1.51	0.34	T	T	0.0002	0.0082	Multiple_Complex
TC0500009224.hg.1	LSM11, U7 small nuclear RNA associated	LSM11	2.46	9.09	7.79	0.43	0.52	T	T	3.09e-05	0.0018	Coding
TC0100012828.hg.1	leucine zipper and CTNNBIP1 domain containing	LZIC	2.46	11.65	10.36	0.25	0.49	T	T	8.15e-06	0.0006	Multiple_Complex
TC1900008433.hg.1	glioma tumor suppressor candidate region gene 2; small nucleolar RNA, C/D box 23	GLTSCR2; SNORD23	2.46	9.62	8.33	0.4	0.5	T	T	0.0006	0.0187	Multiple_Complex
TC1200010450.hg.1	YY1 associated factor 2	YAF2	2.46	7.11	5.82	0.18	0.3	T	T	7.34e-05	0.0036	Multiple_Complex
TC0100015781.hg.1	phosphatidylinositol 4-kinase, catalytic, beta	PI4KB	2.46	8.77	7.47	0.66	0.19	T	T	0.0001	0.0061	Multiple_Complex
TC0600012536.hg.1	serine/arginine-rich splicing factor 12	SRSF12	2.45	12.57	11.28	0.17	0.28	T	T	4.25e-05	0.0024	Multiple_Complex
TC2200009279.hg.1	single-pass membrane protein with aspartate-rich tail 1	SMDT1	2.45	9.34	8.05	0.37	0.2	T	T	0.001	0.0278	Multiple_Complex
TC1100007301.hg.1	proline rich 5 like	PRR5L	2.45	5.3	4.01	0.16	0.16	T	T	0.0005	0.016	Multiple_Complex
TC1300009933.hg.1	RAS p21 protein activator 3	RASA3	2.45	8.84	7.54	0.42	0.21	T	T	0.003	0.0632	Multiple_Complex
TC0600007887.hg.1	zinc finger, AN1-type domain 3	ZFAND3	2.45	13.66	12.37	0.33	0.32	T	T	6.67e-05	0.0034	Multiple_Complex
TC1800006635.hg.1	twisted gastrulation BMP signaling modulator 1	TWSG1	2.45	11.54	10.25	0.46	0.65	T	T	0.0058	0.1007	Multiple_Complex
TC0300013451.hg.1		RP11-42D20.1	2.45	11.68	10.39	0.1	0.33	T	T	0.0008	0.024	Multiple_Complex
TC1800007911.hg.1	myomesin 1	MYOM1	2.45	6.74	5.45	1.57	0.21	T	T	0.0211	0.2285	Multiple_Complex
TC1200010591.hg.1	cyclin T1	CCNT1	2.44	13.45	12.16	0.25	0.55	T	T	0.0056	0.098	Multiple_Complex
TC2200007468.hg.1	thyrotrophic embryonic factor	TEF	2.44	7.61	6.32	0.72	0.06	T	T	3.24e-05	0.0019	Multiple_Complex
TC0300013699.hg.1		AC069257.6	2.44	6.08	4.79	0.56	0.5	T	T	0.0059	0.1026	Multiple_Complex
TC1100013049.hg.1	Bardet-Biedl syndrome 1	BBS1	2.44	7.47	6.18	0.52	0.39	T	T	0.0107	0.151	Multiple_Complex
TC2200007572.hg.1		RP4-796I17.5	2.44	9.08	7.8	0.63	0.51	T	T	0.036	0.3091	Multiple_Complex
TC0100015645.hg.1	neuroblastoma breakpoint family, member 11	NBPF11	2.44	8.96	7.67	0.77	0.29	T	T	0.0031	0.0658	Multiple_Complex
TC0300009866.hg.1	coiled-coil domain containing 50	CCDC50	2.44	12.42	11.14	0.17	0.58	T	T	1.76e-05	0.0011	Multiple_Complex
TC0X00011180.hg.1	renin binding protein	RENBP	2.43	5.99	4.71	0.46	0.24	T	T	0.001	0.0283	Multiple_Complex
TC0700006650.hg.1	chromosome 7 open reading frame 26	C7orf26	2.43	8.65	7.36	0.52	0.75	T	T	0.0034	0.0697	Multiple_Complex
TC1100012811.hg.1	nuclear factor related to kappaB binding protein	NFRKB	2.43	9.99	8.71	0.41	0.61	T	T	0.0003	0.0101	Multiple_Complex
TC1100009615.hg.1	VPS26 retromer complex component B	VPS26B	2.43	12.49	11.21	0.36	0.11	T	T	3.05e-05	0.0018	Multiple_Complex
TC0100011901.hg.1	RAB4A, member RAS oncogene family; S-phase response (cyclin related)	RAB4A; SPHAR	2.43	13.06	11.78	0.23	0.38	T	T	1.13e-05	0.0008	Multiple_Complex
TC1700006877.hg.1	ADP-ribose/CDP-alcohol diphosphatase, manganese-dependent	ADPRM	2.43	8.87	7.59	0.22	0.23	T	T	0.0016	0.0404	Multiple_Complex
TC2000009923.hg.1	Sys1 golgi trafficking protein	SYS1	2.43	8.27	6.99	0.23	1.02	T	T	0.004	0.078	Multiple_Complex
TC1900011935.hg.1	ZFP30 zinc finger protein	ZFP30	2.43	9.28	8	0.22	0.67	T	T	0.0104	0.1481	Multiple_Complex
TC0500011470.hg.1	family with sequence similarity 172, member A; POU domain class 5, transcription factor 2; microRNA 2277	FAM172A; POU5F2; MIR2277	2.43	10.44	9.17	0.24	0.66	T	T	0.0017	0.042	Multiple_Complex
TC1200008843.hg.1	family with sequence similarity 216, member A	FAM216A	2.42	9.86	8.58	0.34	0.51	T	T	0.0207	0.2263	Multiple_Complex
TC1500007659.hg.1	protein inhibitor of activated STAT 1	PIAS1	2.42	16.15	14.87	0.24	0.56	T	T	0.0222	0.2357	Multiple_Complex
TC1100009237.hg.1	vacuolar protein sorting 11 homolog (S. cerevisiae)	VPS11	2.42	10.4	9.13	0.34	0.07	T	T	0.0037	0.0744	Multiple_Complex
TC0900011252.hg.1	FK506 binding protein 15	FKBP15	2.42	10.15	8.88	0.17	0.4	T	T	0.0024	0.0547	Multiple_Complex
TC1000008044.hg.1	glutamate dehydrogenase 1 pseudogene 3	GLUD1P3	2.42	15.93	14.65	0.44	0.13	T	T	1.81e-05	0.0012	Multiple_Complex
TC1200010024.hg.1	Rho GDP dissociation inhibitor (GDI) beta	ARHGDIB	2.42	6.02	4.74	0.17	0.51	T	F	7.09e-05	0.0035	Multiple_Complex
TC0300012118.hg.1	transmembrane protein 39A	TMEM39A	2.42	13.46	12.18	0.91	0.8	T	T	0.0002	0.0089	Multiple_Complex
TC2000009071.hg.1	small nucleolar RNA, H/ACA box 71B	SNORA71B	2.42	8.25	6.97	0.26	0.33	T	T	0.0006	0.0187	Multiple_Complex
TC1300009273.hg.1	COMM domain containing 6	COMMD6	2.42	15.59	14.32	0.61	0.52	T	T	0.0005	0.0177	Multiple_Complex
TC0200007249.hg.1	G-patch domain containing 11	GPATCH11	2.41	10.37	9.1	0.34	0.97	T	T	0.0006	0.019	Multiple_Complex
TC2200009326.hg.1	glucuronidase, beta pseudogene 11	GUSBP11	2.41	8.13	6.85	0.42	0.28	T	T	4e-05	0.0022	Multiple_Complex
TC1700008498.hg.1	protein phosphatase, Mg2+/Mn2+ dependent, 1D	PPM1D	2.41	10.9	9.63	0.37	0.48	T	T	0.0009	0.0273	Multiple_Complex
TC0X00010441.hg.1	Homo sapiens H2B histone family, member X, pseudogene (H2BFXP), non-coding RNA.; Homo sapiens H2B histone family, member M pseudogene (LOC100101478), non-coding RNA.	H2BFXP; LOC100101478	2.41	7.68	6.41	0.3	0.42	T	T	0.0003	0.0102	Multiple_Complex
TC1400006659.hg.1	matrix metallopeptidase 14 (membrane-inserted)	MMP14	2.41	8.49	7.22	0.44	0.47	T	T	0.0006	0.0181	Multiple_Complex
TC0100012435.hg.1		RP11-54O7.10	2.41	10.46	9.19	0.33	0.35	T	T	0.0192	0.2171	Multiple_Complex
TC1400007259.hg.1	pellino E3 ubiquitin protein ligase family member 2	PELI2	2.41	9.93	8.66	0.09	0.37	T	T	0.0026	0.0572	Multiple_Complex
TC0600012290.hg.1	ribosomal protein L39 pseudogene 3	RPL39P3	2.41	16.22	14.95	0.28	0.43	T	T	0.0003	0.0113	Multiple_Complex
TC2100008163.hg.1	poly(rC) binding protein 2 pseudogene 1	PCBP2P1	2.41	6.07	4.8	0.38	0.27	T	T	8.83e-05	0.0042	Multiple_Complex
TC1700010961.hg.1	secernin 2	SCRN2	2.41	6.88	5.61	0.2	0.41	T	T	0.0033	0.0676	Multiple_Complex
TC2000007512.hg.1	PDX1 C-terminal inhibiting factor 1	PCIF1	2.41	11.64	10.38	0.75	0.41	T	T	0.0031	0.0654	Multiple_Complex
TC0500010104.hg.1	death-associated protein	DAP	2.4	9.11	7.85	0.25	0.09	T	T	0.0006	0.0196	Multiple_Complex
TC1700007360.hg.1	transmembrane protein 97	TMEM97	2.4	16.43	15.16	0.16	0.51	T	T	0.0001	0.0052	Coding
TC0X00008052.hg.1	chromosome X open reading frame 57	CXorf57	2.4	8.84	7.58	0.58	0.34	T	T	0.0011	0.0312	Multiple_Complex
TC0100007403.hg.1	transmembrane protein 57	TMEM57	2.4	11.07	9.81	0.25	0.43	T	T	9.53e-05	0.0045	Multiple_Complex
TC1400008295.hg.1	microRNA 487a	MIR487A	2.4	4.34	3.08	0.1	0.39	T	F	0.0059	0.1016	Multiple_Complex
TC0600009262.hg.1	solute carrier family 35, member F1	SLC35F1	2.39	12.01	10.75	0.5	0.46	T	T	0.0159	0.1939	Coding
TC1900009558.hg.1	zinc finger protein 558	ZNF558	2.39	9.41	8.16	0.14	0.83	T	T	0.0085	0.13	Multiple_Complex
TC0100014133.hg.1	ATP/GTP binding protein-like 4	AGBL4	2.39	8.04	6.78	0.92	0.86	T	T	0.0013	0.0355	Multiple_Complex
TC0300010033.hg.1	p21 protein (Cdc42/Rac)-activated kinase 2	PAK2	2.39	12.89	11.63	0.19	0.27	T	T	0.0001	0.0062	Multiple_Complex
TC0100010282.hg.1	ATPase, Na+/K+ transporting, alpha 4 polypeptide	ATP1A4	2.39	6.78	5.52	0.31	0.15	T	T	0.0005	0.016	Multiple_Complex
TC0100014175.hg.1	epidermal growth factor receptor pathway substrate 15	EPS15	2.39	13.07	11.81	0.24	0.35	T	T	0.0021	0.0497	Multiple_Complex
TC1900010941.hg.1	excision repair cross-complementation group 1	ERCC1	2.39	11.23	9.98	0.29	0.29	T	T	0.0001	0.0052	Multiple_Complex
TC1000009997.hg.1	cancer susceptibility candidate 10	CASC10	2.39	6.52	5.27	0.44	0.56	T	T	0.0133	0.1728	Multiple_Complex
TC1000006466.hg.1	WD repeat domain 37	WDR37	2.38	9.82	8.56	0.69	0.48	T	T	0.0003	0.0111	Multiple_Complex
TC2000006464.hg.1	family with sequence similarity 110, member A	FAM110A	2.38	8.8	7.55	1.19	0.58	T	T	0.0101	0.1456	Multiple_Complex
TC0500013429.hg.1	ring finger protein 130	RNF130	2.38	15.59	14.34	0.23	0.12	T	T	8.55e-06	0.0006	Multiple_Complex
TC0700009488.hg.1	caspase 2	CASP2	2.38	13.13	11.88	0.55	0.34	T	T	0.0051	0.0921	Multiple_Complex
TC0100010334.hg.1	ubiquitin-fold modifier conjugating enzyme 1	UFC1	2.38	14.57	13.32	0.24	0.21	T	T	5.67e-05	0.003	Multiple_Complex
TC1300009965.hg.1	olfactory receptor, family 7, subfamily E, member 156 pseudogene	OR7E156P	2.38	4.79	3.54	0.52	0.21	T	F	0.0002	0.0083	Multiple_Complex
TC1100011794.hg.1	prolylcarboxypeptidase	PRCP	2.38	13.93	12.68	0.38	0.24	T	T	0.0002	0.0086	Multiple_Complex
TC1400009568.hg.1	solute carrier family 8 (sodium/calcium exchanger), member 3	SLC8A3	2.37	5.35	4.1	0.37	0.49	T	F	0.0126	0.168	Multiple_Complex
TC2200008885.hg.1	polymerase (DNA-directed), delta interacting protein 3	POLDIP3	2.37	12.42	11.17	0.54	0.16	T	T	0.0002	0.0068	Multiple_Complex
TC0900007387.hg.1		RP11-236F9.2	2.37	7.47	6.22	0.74	0.19	T	T	0.0306	0.2824	Multiple_Complex
TC0300012781.hg.1	WW domain containing transcription regulator 1	WWTR1	2.37	6.56	5.31	0.3	0.2	T	T	0.0048	0.0882	Multiple_Complex
TC2200006703.hg.1	hypermethylated in cancer 2	HIC2	2.37	6.51	5.27	0.43	0.52	T	T	0.0039	0.0766	Multiple_Complex
TC0400011518.hg.1	integrator complex subunit 12	INTS12	2.37	13.14	11.9	0.21	0.27	T	T	2.69e-06	0.0002	Multiple_Complex
TC0200012992.hg.1		AC016700.6	2.37	15.96	14.72	0.27	0.45	T	T	0.0021	0.0489	Multiple_Complex
TC0200016770.hg.1	microRNA 6809; tensin 1	MIR6809; TNS1	2.37	5.24	4	0.44	0.19	T	T	0.0009	0.0264	Multiple_Complex
TC0X00008201.hg.1		AC005000.1	2.36	13.34	12.1	0.07	0.42	T	T	0.0012	0.0323	Multiple_Complex
TC0500010788.hg.1	interleukin 6 signal transducer	IL6ST	2.36	9.36	8.12	0.28	0.41	T	T	0.0105	0.1497	Multiple_Complex
TC0700008360.hg.1	CAS1 domain containing 1	CASD1	2.36	14	12.76	0.15	0.59	T	T	0.0008	0.0237	Multiple_Complex
TC0100013275.hg.1	zinc finger protein 436	ZNF436	2.36	7.64	6.4	0.47	0.41	T	T	0.0001	0.0064	Coding
TC1600007034.hg.1		RP11-958N24.2	2.36	9.78	8.54	0.13	0.19	T	T	0.0001	0.006	Multiple_Complex
TC1700008844.hg.1	tweety family member 2	TTYH2	2.36	8.17	6.93	0.44	0.27	T	T	0.002	0.0482	Multiple_Complex
TC1800006589.hg.1	protein tyrosine phosphatase, receptor type, M	PTPRM	2.36	10.09	8.85	0.64	0.81	T	T	0.0157	0.1923	Multiple_Complex
TC0100010369.hg.1	activating transcription factor 6	ATF6	2.36	12.43	11.19	0.2	0.2	T	T	1.45e-05	0.001	Multiple_Complex
TC0500008846.hg.1	IgA-inducing protein	IGIP	2.36	5.73	4.5	0.68	0.28	F	F	0.0041	0.0797	Coding
TC0200013899.hg.1	zinc finger CCCH-type containing 8	ZC3H8	2.36	10.62	9.39	0.51	0.38	T	T	0.0008	0.0234	Multiple_Complex
TC1200009202.hg.1	ribosomal protein L21 pseudogene 1 [Source:HGNC Symbol;Acc:HGNC:10314]	RPL21P1	2.35	13.09	11.86	0.14	0.54	T	T	0.0022	0.0513	Multiple_Complex
TC1700011038.hg.1	zinc finger protein 652	ZNF652	2.35	12.25	11.02	0.4	0.28	T	T	0.0079	0.1242	Multiple_Complex
TC1900011673.hg.1	coiled-coil domain containing 130	CCDC130	2.35	9.52	8.29	0.23	0.47	T	T	0.0256	0.2559	Multiple_Complex
TC0100018323.hg.1	immediate early response 5	IER5	2.35	7.97	6.74	0.65	0.48	T	T	0.0012	0.0338	Coding
TC0700012227.hg.1	Small nucleolar RNA U3 [Source:RFAM;Acc:RF00012]	U3	2.35	6.2	4.97	0.95	0.1	T	T	0.0008	0.0233	Multiple_Complex
TC1200009740.hg.1	intermediate filament family orphan 1	IFFO1	2.35	7.48	6.25	0.36	0.25	T	T	3.19e-05	0.0019	Multiple_Complex
TC1400008355.hg.1	REST corepressor 1	RCOR1	2.34	11.06	9.83	0.8	0.48	T	T	0.0021	0.0491	Multiple_Complex
TC1100011587.hg.1	family with sequence similarity 168, member A	FAM168A	2.34	6.81	5.58	0.89	0.25	T	T	0.0114	0.1572	Multiple_Complex
TC1000010993.hg.1	mitochondrial calcium uptake 1	MICU1	2.34	12.16	10.93	0.59	0.37	T	T	0.0025	0.0555	Multiple_Complex
TC1500010382.hg.1	retinaldehyde binding protein 1	RLBP1	2.34	4.34	3.11	0.42	0.11	T	F	0.0003	0.0115	Multiple_Complex
TC1900010984.hg.1	coiled-coil domain containing 8	CCDC8	2.34	8.66	7.43	0.48	0.25	T	T	0.0051	0.092	Coding
TC0600011541.hg.1	ribosomal protein L35a pseudogene 4 [Source:HGNC Symbol;Acc:HGNC:33460]	RPL35AP4	2.34	10.32	9.09	0.3	0.27	T	T	0.0041	0.0793	Multiple_Complex
TC1400009912.hg.1	galactosylceramidase	GALC	2.34	10.68	9.45	0.37	0.77	T	T	0.0043	0.0826	Multiple_Complex
TC0200009601.hg.1	methyl-CpG binding domain protein 5	MBD5	2.34	9.44	8.21	0.3	0.15	T	T	0.0002	0.0073	Multiple_Complex
TC0900009909.hg.1	dynactin 3 (p22)	DCTN3	2.34	9.1	7.88	0.74	0.06	T	T	0.0011	0.0301	Multiple_Complex
TC1000008881.hg.1	MAX interactor 1, dimerization protein	MXI1	2.34	11.5	10.27	0.56	0.62	T	T	0.0282	0.2697	Multiple_Complex
TC1200010577.hg.1	zinc finger protein 641	ZNF641	2.34	6.7	5.48	0.59	0.13	T	T	0.0013	0.035	Multiple_Complex
TC0500007083.hg.1		RP11-36C20.1	2.34	15.07	13.85	0.12	0.49	T	T	0.0155	0.1905	Multiple_Complex
TC0100009658.hg.1	SLIT-ROBO Rho GTPase activating protein 2C	SRGAP2C	2.34	13.54	12.31	0.19	0.17	T	T	0.0002	0.0085	Multiple_Complex
TC0900012230.hg.1	solute carrier family 25, member 51	SLC25A51	2.34	10.98	9.75	0.19	0.22	T	T	1.12e-05	0.0008	Multiple_Complex
TC0600014265.hg.1	chloride intracellular channel 1	CLIC1	2.34	15.09	13.87	0.3	0.25	T	T	0.01	0.1452	Coding
TC0100018463.hg.1	ras homolog family member C	RHOC	2.34	13.21	11.98	0.5	0.65	T	T	0.0265	0.2611	Multiple_Complex
TC1000008736.hg.1	suppressor of fused homolog (Drosophila)	SUFU	2.33	8.54	7.32	0.33	0.25	T	T	0.0001	0.0054	Multiple_Complex
TC0100013744.hg.1	MYST/Esa1-associated factor 6	MEAF6	2.33	12.93	11.71	0.28	0.37	T	T	9.88e-05	0.0046	Multiple_Complex
TC1200011976.hg.1	microRNA 1302-1	MIR1302-1	2.33	5.16	3.94	0.6	0.51	F	F	0.0002	0.0078	Multiple_Complex
TC1600010258.hg.1	ribosomal protein L10 pseudogene 14	RPL10P14	2.33	9.24	8.02	0.39	0.47	T	T	0.0218	0.2328	Multiple_Complex
TC0X00010826.hg.1	firre intergenic repeating RNA element	FIRRE	2.33	14.54	13.32	0.11	0.18	T	T	5.14e-06	0.0004	Multiple_Complex
TC0600008095.hg.1	polymerase (RNA) I polypeptide C	POLR1C	2.33	12.26	11.05	0.14	0.09	T	T	1.55e-05	0.001	Multiple_Complex
TC2000010001.hg.1	phosphatidylinositol glycan anchor biosynthesis class U	PIGU	2.32	12.87	11.65	0.32	0.4	T	T	0.0002	0.0068	Multiple_Complex
TC0500013369.hg.1	SIL1 nucleotide exchange factor	SIL1	2.32	6.56	5.35	0.12	0.1	T	T	8.21e-06	0.0006	Multiple_Complex
TC0X00007661.hg.1		RP11-130N24.2	2.32	10.7	9.49	0.33	0.61	T	T	0.0001	0.0059	Multiple_Complex
TC1200010589.hg.1	small nucleolar RNA, H/ACA box 2C; microRNA 1291	SNORA2C; MIR1291	2.31	11.69	10.48	0.41	0.13	T	T	0.0002	0.0088	Multiple_Complex
TC1700007930.hg.1	ribosomal protein L27	RPL27	2.31	16.08	14.87	0.48	0.42	T	T	0.0047	0.0875	Multiple_Complex
TC0X00009069.hg.1	Rho GTPase activating protein 6	ARHGAP6	2.31	5.73	4.52	0.72	0.16	T	T	0.0024	0.0545	Multiple_Complex
TC0100015685.hg.1	Homo sapiens phosphodiesterase 4D interacting protein pseudogene (LOC653513), non-coding RNA.	LOC653513	2.31	6.77	5.56	0.47	0.58	T	T	0.0059	0.1022	Multiple_Complex
TC1700011083.hg.1	sterile alpha motif domain containing 14	SAMD14	2.31	6.15	4.94	0.83	0.36	T	T	0.0039	0.0766	Multiple_Complex
TC1100009611.hg.1	junctional adhesion molecule 3	JAM3	2.31	13.42	12.22	0.18	0.7	T	T	1.76e-05	0.0011	Multiple_Complex
TC1000008800.hg.1	glutathione S-transferase omega 1	GSTO1	2.31	9.51	8.31	0.07	0.63	T	T	8.52e-05	0.0041	Multiple_Complex
TC0X00007713.hg.1	lysophosphatidic acid receptor 4	LPAR4	2.31	11.01	9.8	0.52	0.44	T	T	0.0342	0.3008	Multiple_Complex
TC0600009858.hg.1		RP1-292B18.1	2.31	9.87	8.66	0.16	0.34	T	T	0.0013	0.0348	Multiple_Complex
TC1100009495.hg.1	potassium channel, inwardly rectifying subfamily J, member 5	KCNJ5	2.31	4.87	3.66	0.1	0.1	T	F	1.73e-05	0.0011	Multiple_Complex
TC1700007791.hg.1	retinoic acid receptor, alpha	RARA	2.31	9.16	7.95	0.6	0.41	T	T	0.0083	0.1285	Multiple_Complex
TC0600011901.hg.1		RP5-1120P11.4	2.3	8.66	7.45	0.19	0.34	T	T	0.0011	0.0307	Multiple_Complex
TC0900006442.hg.1	KN motif and ankyrin repeat domains 1	KANK1	2.3	8.99	7.79	0.74	0.43	T	T	0.0004	0.0152	Multiple_Complex
TC0100010133.hg.1	misato 1, mitochondrial distribution and morphology regulator; misato family member 2, pseudogene	MSTO1; MSTO2P	2.3	10.37	9.17	0.5	0.16	T	T	0.0001	0.0055	Multiple_Complex
TC0200008627.hg.1	neuronal PAS domain protein 2	NPAS2	2.3	9.15	7.94	0.6	0.21	T	T	0.0053	0.0943	Multiple_Complex
TC0100017836.hg.1	lysosomal trafficking regulator	LYST	2.3	5.15	3.95	0.35	0.15	T	F	0.0007	0.0207	Multiple_Complex
TC1100011754.hg.1	teneurin transmembrane protein 4	TENM4	2.3	6.82	5.62	1.31	0.48	T	T	0.0315	0.2868	Multiple_Complex
TC0200008980.hg.1	WAS protein family homolog 2 pseudogene	WASH2P	2.3	12.04	10.84	0.25	0.34	T	T	0.0018	0.0436	Multiple_Complex
TC1700008661.hg.1	protein kinase C, alpha	PRKCA	2.29	7.24	6.05	0.21	0.17	T	T	0.0005	0.016	Multiple_Complex
TC1900007313.hg.1	unconventional SNARE in the ER 1 homolog (S. cerevisiae)	USE1	2.29	9.88	8.69	1	0.12	T	T	0.003	0.0635	Multiple_Complex
TC0700006619.hg.1	solute carrier family 29 (equilibrative nucleoside transporter), member 4	SLC29A4	2.29	7.95	6.75	0.84	0.21	T	T	0.0025	0.056	Multiple_Complex
TC1300007757.hg.1	MT-CYB pseudogene 3 [Source:HGNC Symbol;Acc:HGNC:39579]	MTCYBP3	2.29	7.18	5.98	0.53	0.12	T	T	0.0489	0.3615	Multiple_Complex
TC0800008692.hg.1	HAS2 antisense RNA 1	HAS2-AS1	2.29	4.82	3.62	0.27	0.36	T	F	0.0007	0.0221	Multiple_Complex
TC1200007777.hg.1	neuronal differentiation 4	NEUROD4	2.29	5.41	4.22	0.57	0.49	T	F	0.0416	0.3324	Coding
TC1200010978.hg.1	microRNA 6759	MIR6759	2.29	7.17	5.98	0.31	0.43	T	T	9.52e-05	0.0045	Multiple_Complex
TC1200010585.hg.1	lactalbumin, alpha-	LALBA	2.28	5.16	3.97	0.6	0.22	T	F	0.006	0.1031	Coding
TC2000009973.hg.1	zinc finger protein 343	ZNF343	2.28	7.51	6.32	0.36	0.59	T	T	0.0037	0.0745	Multiple_Complex
TC1600007982.hg.1	homocysteine-inducible, endoplasmic reticulum stress-inducible, ubiquitin-like domain member 1	HERPUD1	2.28	10.19	8.99	0.96	0.55	T	T	0.0065	0.109	Multiple_Complex
TC0700012293.hg.1	transmembrane protein 168	TMEM168	2.28	9.67	8.48	0.24	0.55	T	T	0.0249	0.2515	Multiple_Complex
TC0700011495.hg.1	transducin (beta)-like 2	TBL2	2.28	10.43	9.23	0.57	0.17	T	T	0.0022	0.0506	Multiple_Complex
TC1200007505.hg.1	phosphofructokinase, muscle	PFKM	2.28	12.13	10.94	0.54	0.44	T	T	0.0019	0.0461	Multiple_Complex
TC0100016443.hg.1	growth arrest-specific 5 (non-protein coding); small nucleolar RNA, C/D box 74; small nucleolar RNA, C/D box 47; small nucleolar RNA, C/D box 44; small nucleolar RNA, C/D box 79; small nucleolar RNA, C/D box 80; small nucleolar RNA, C/D box 75; small nucleolar RNA, C/D box 76; small nucleolar RNA, C/D box 77; small nucleolar RNA, C/D box 78	GAS5; SNORD74; SNORD47; SNORD44; SNORD79; SNORD80; SNORD75; SNORD76; SNORD77; SNORD78	2.28	16.79	15.6	0.23	0.27	T	T	5e-05	0.0027	Multiple_Complex
TC1100006771.hg.1	eukaryotic translation initiation factor 3, subunit F	EIF3F	2.28	16.51	15.32	0.17	0.11	T	T	1.22e-06	0.0001	Multiple_Complex
TC0600009144.hg.1	KIAA1919	KIAA1919	2.28	9.03	7.84	0.2	0.76	T	T	0.0013	0.0354	Multiple_Complex
TC0200013298.hg.1	ST3 beta-galactoside alpha-2,3-sialyltransferase 5	ST3GAL5	2.28	8.36	7.17	1.24	0.36	T	T	0.0007	0.0212	Multiple_Complex
TC0700011929.hg.1	SMAD specific E3 ubiquitin protein ligase 1	SMURF1	2.28	12.07	10.88	0.25	0.24	T	T	0.0004	0.0131	Multiple_Complex
TC1500007057.hg.1	tubulin, gamma complex associated protein 4	TUBGCP4	2.27	13.16	11.97	0.64	0.22	T	T	0.0007	0.0217	Multiple_Complex
TC0200008904.hg.1	fibulin 7	FBLN7	2.27	5.38	4.19	0.11	0.22	T	T	0.0003	0.0097	Multiple_Complex
TC0100009700.hg.1	SLIT-ROBO Rho GTPase activating protein 2D (pseudogene)	SRGAP2D	2.27	11.79	10.6	0.19	0.2	T	T	0.0025	0.0557	Multiple_Complex
TC1400008931.hg.1	septin 7 pseudogene 1	SEPT7P1	2.27	7.12	5.94	0.36	0.35	T	T	0.0002	0.0067	Multiple_Complex
TC1300008341.hg.1	MT-CO3 pseudogene 2 [Source:HGNC Symbol;Acc:HGNC:39681]	MTCO3P2	2.27	5.18	3.99	0.41	0.42	T	T	0.0175	0.2045	Multiple_Complex
TC0100007716.hg.1	zinc finger protein 362	ZNF362	2.27	10.43	9.25	0.28	0.67	T	T	0.0017	0.0433	Multiple_Complex
TC0200013812.hg.1	ribosomal protein L10 pseudogene 5 [Source:HGNC Symbol;Acc:HGNC:35724]	RPL10P5	2.27	11.12	9.94	0.25	0.62	T	T	0.0198	0.2206	Multiple_Complex
TC1400010584.hg.1	interferon regulatory factor 9	IRF9	2.27	7.7	6.51	0.45	0.46	T	T	0.0025	0.0563	Multiple_Complex
TC1700008539.hg.1	mannose receptor, C type 2	MRC2	2.27	8.14	6.96	1.21	0.12	T	T	0.0239	0.2452	Multiple_Complex
TC1900007513.hg.1	ribosomal protein L36a pseudogene 51	RPL36AP51	2.27	8.91	7.73	0.09	0.29	T	T	0.0002	0.0094	Multiple_Complex
TC0600013206.hg.1	solute carrier family 18, subfamily B, member 1	SLC18B1	2.27	12.84	11.65	0.37	0.15	T	T	0.0038	0.075	Multiple_Complex
TC1200006894.hg.1	ribosomal protein L13a pseudogene 20	RPL13AP20	2.27	14.94	13.76	0.29	0.65	T	T	0.0014	0.036	Multiple_Complex
TC2200009259.hg.1	smoothelin	SMTN	2.27	9.1	7.92	0.18	0.37	T	T	0.0029	0.0623	Multiple_Complex
TC0700012119.hg.1	DPY19L2 pseudogene 2	DPY19L2P2	2.27	7.25	6.07	0.22	0.41	T	T	0.0007	0.0227	Multiple_Complex
TC0100015236.hg.1	late endosomal/lysosomal adaptor, MAPK and MTOR activator 5	LAMTOR5	2.27	12.41	11.23	0.65	0.31	T	T	0.0001	0.0064	Multiple_Complex
TC1900007206.hg.1		AC004699.1	2.26	4.83	3.65	0.09	0.15	F	F	0.0002	0.0091	Multiple_Complex
TC1500008003.hg.1	transmembrane p24 trafficking protein 3	TMED3	2.26	9.56	8.38	0.67	0.29	T	T	0.0015	0.0385	Multiple_Complex
TC1200012801.hg.1	citrate synthase	CS	2.26	15.99	14.82	0.09	0.48	T	T	0.0003	0.0114	Multiple_Complex
TC0300011367.hg.1		RP11-1036F1.1	2.26	8.47	7.29	0.44	0.42	T	T	0.0028	0.0611	Multiple_Complex
TC1300010041.hg.1	mitochondrial ribosomal protein S31 pseudogene 5	MRPS31P5	2.26	11.09	9.91	0.2	0.3	T	T	0.0012	0.0329	Multiple_Complex
TC0100006954.hg.1	kazrin, periplakin interacting protein	KAZN	2.26	7.91	6.73	0.01	0.47	T	T	0.0157	0.1919	Multiple_Complex
TC1400008709.hg.1		RP11-124D2.1	2.26	5.75	4.57	0.16	0.15	T	F	0.0001	0.0049	Multiple_Complex
TC0700010942.hg.1	small nucleolar RNA, H/ACA box 9; small nucleolar RNA host gene 15	SNORA9; SNHG15	2.26	8.6	7.42	0.59	0.33	T	T	0.0163	0.1964	Multiple_Complex
TC1400010717.hg.1	protein phosphatase 1, regulatory subunit 3E	PPP1R3E	2.26	6.71	5.53	0.28	0.31	T	T	0.005	0.0907	Multiple_Complex
TC0700010339.hg.1	ribosomal protein L36a pseudogene 26	RPL36AP26	2.26	14.03	12.86	0.13	0.5	T	T	0.0258	0.257	Multiple_Complex
TC0900006708.hg.1	small nuclear RNA activating complex polypeptide 3	SNAPC3	2.26	12.87	11.7	0.18	0.29	T	T	0.0002	0.0067	Multiple_Complex
TC2000009882.hg.1	protein tyrosine phosphatase, receptor type, A; vacuolar protein sorting 16 homolog (S. cerevisiae)	PTPRA; VPS16	2.25	16.32	15.15	0.15	0.03	T	T	1.75e-06	0.0002	Multiple_Complex
TC0800011395.hg.1	LDL receptor related protein 12	LRP12	2.25	8.99	7.82	0.35	0.34	T	T	0.0003	0.0104	Multiple_Complex
TC1100009340.hg.1	ribosomal protein L34 pseudogene 23	RPL34P23	2.25	7.17	6	0.15	0.37	T	T	0.0003	0.0118	Multiple_Complex
TC1400009538.hg.1	DDB1 and CUL4 associated factor 5	DCAF5	2.25	11.44	10.27	0.31	0.38	T	T	1.17e-05	0.0008	Multiple_Complex
TC1700010230.hg.1	TGFB1-induced anti-apoptotic factor 1; myosin XVIIIA	TIAF1; MYO18A	2.25	9.27	8.1	0.59	0.08	T	T	0.0002	0.0075	Multiple_Complex
TC1400006451.hg.1		RP11-536C10.15	2.25	12	10.83	0.43	0.52	T	T	0.0195	0.2187	Multiple_Complex
TC0900012124.hg.1	polymerase (RNA) I polypeptide E	POLR1E	2.25	11.68	10.51	0.01	0.62	T	T	0.0002	0.0078	Multiple_Complex
TC0X00007194.hg.1	TBC1 domain family, member 25	TBC1D25	2.25	8.59	7.42	0.62	0.29	T	T	5.58e-05	0.0029	Multiple_Complex
TC0100018234.hg.1	TNNI3 interacting kinase	TNNI3K	2.25	7.38	6.21	0.29	0.39	T	T	0.0114	0.1576	Multiple_Complex
TC0500013281.hg.1	bromodomain containing 9 pseudogene 2 [Source:HGNC Symbol;Acc:HGNC:51446]	BRD9P2	2.25	9.09	7.92	0.11	0.67	T	T	0.0012	0.0325	Multiple_Complex
TC0300012676.hg.1	procollagen C-endopeptidase enhancer 2	PCOLCE2	2.25	9.6	8.43	0.19	0.52	T	T	0.0002	0.009	Multiple_Complex
TC0500007347.hg.1		CTD-2312P21.1	2.25	6.19	5.02	0.42	0.48	T	T	0.0422	0.3343	Multiple_Complex
TC0200015539.hg.1	microRNA 2355	MIR2355	2.25	4.73	3.57	0.55	0.27	F	F	0.0423	0.3347	Multiple_Complex
TC0600011525.hg.1	retinoid X receptor beta	RXRB	2.25	10.92	9.76	0.36	0.22	T	T	0.0003	0.0116	Multiple_Complex
TC2100008506.hg.1	MORC family CW-type zinc finger 3	MORC3	2.24	11.55	10.38	0.18	0.7	T	T	0.0071	0.1154	Multiple_Complex
TC0100010152.hg.1	lamin A/C	LMNA	2.24	9.02	7.85	0.63	0.48	T	T	0.0004	0.0142	Multiple_Complex
TC2000006442.hg.1	neurensin 2	NRSN2	2.24	9.93	8.76	0.57	0.42	T	T	0.0166	0.1992	Multiple_Complex
TC0500012986.hg.1	SUMO-interacting motifs containing 1 pseudogene; Jeck2013, Salzman2013 ANNOTATED, INTERNAL, ncRNA, OVEXON best transcript NR_026921; Jeck2013 ALT_DONOR, INTERNAL, ncRNA, OVEXON best transcript NR_026921; Salzman2013 ANNOTATED, ncRNA, OVERLAPTX, OVEXON best transcript NR_026921	LOC202181	2.24	11.21	10.05	0.34	0.18	T	T	0.0009	0.0272	Multiple_Complex
TC0900009339.hg.1	WAS protein family homolog 1	WASH1	2.24	9.83	8.66	0.42	0.36	T	T	0.0096	0.1415	Multiple_Complex
TC1700010336.hg.1		RP11-640N20.8	2.24	12.25	11.08	0.45	0.35	T	T	8.61e-05	0.0042	Multiple_Complex
TC1100011539.hg.1	nuclear mitotic apparatus protein 1	NUMA1	2.24	10.91	9.74	0.32	0.25	T	T	0.0016	0.0415	Multiple_Complex
TC2000007283.hg.1	SRC proto-oncogene, non-receptor tyrosine kinase	SRC	2.24	12.02	10.86	0.48	0.28	T	T	0.0002	0.0094	Multiple_Complex
TC0100006874.hg.1	procollagen-lysine, 2-oxoglutarate 5-dioxygenase 1	PLOD1	2.24	11.39	10.23	0.51	0.61	T	T	0.0374	0.3152	Multiple_Complex
TC0300013930.hg.1	ssu-2 homolog (C. elegans)	SSUH2	2.24	5.09	3.93	0.3	0.3	T	F	0.0007	0.0225	Multiple_Complex
TC0100008156.hg.1	NOP2/Sun domain family, member 4	NSUN4	2.24	11.79	10.63	0.45	0.61	T	T	1.89e-05	0.0012	Multiple_Complex
TC0500006803.hg.1	trio Rho guanine nucleotide exchange factor	TRIO	2.24	8.83	7.66	0.05	0.17	T	T	0.0064	0.1085	Multiple_Complex
TC0X00011106.hg.1	ribosomal protein L12 pseudogene 50 [Source:HGNC Symbol;Acc:HGNC:51942]	RPL12P50	2.24	11.59	10.42	0.2	0.5	T	T	0.0072	0.117	Multiple_Complex
TC2100008495.hg.1	interleukin 10 receptor, beta	IL10RB	2.24	7.52	6.36	0.26	0.08	T	T	0.0015	0.039	Multiple_Complex
TC0700013072.hg.1	WD repeat domain 86	WDR86	2.24	5.91	4.75	0.22	0.41	T	T	0.0015	0.0382	Multiple_Complex
TC1500007677.hg.1	coronin, actin binding protein, 2B	CORO2B	2.23	9.33	8.17	0.66	0.26	T	T	0.005	0.0911	Multiple_Complex
TC0200016654.hg.1	cytochrome c oxidase subunit VIIa polypeptide 2 like	COX7A2L	2.23	15.41	14.25	0.35	0.32	T	T	7.82e-05	0.0038	Multiple_Complex
TC0X00008450.hg.1	Small nucleolar RNA SNORA8 [Source:RFAM;Acc:RF00393]	Z77249.1; SNORA8	2.23	8.14	6.98	0.29	0.32	T	T	0.0003	0.011	Multiple_Complex
TC0200011992.hg.1	DnaJ (Hsp40) homolog, subfamily C, member 27	DNAJC27	2.23	9.37	8.21	0.68	0.33	T	T	0.0005	0.0157	Multiple_Complex
TC0X00008908.hg.1	solute carrier family 25 (mitochondrial carrier; adenine nucleotide translocator), member 6	SLC25A6	2.23	17.97	16.81	0.26	0.14	T	T	5.13e-05	0.0027	Multiple_Complex
TC1100011552.hg.1	ClpB homolog, mitochondrial AAA ATPase chaperonin	CLPB	2.23	10.93	9.77	0.09	0.11	T	T	0.0009	0.0267	Multiple_Complex
TC1700010440.hg.1	matrix metallopeptidase 28	MMP28	2.23	4.37	3.22	0.35	0.1	T	F	2.57e-05	0.0015	Multiple_Complex
TC0400012836.hg.1	glutamyl aminopeptidase (aminopeptidase A)	ENPEP	2.23	7.04	5.88	0.15	0.31	T	T	0.0108	0.1519	Multiple_Complex
TC0800008235.hg.1	family with sequence similarity 92, member A1	FAM92A1	2.23	12.73	11.58	0.22	0.43	T	T	0.001	0.0275	Multiple_Complex
TC0600008168.hg.1	ankyrin repeat domain 66	ANKRD66	2.23	4.94	3.79	0.58	0.19	T	T	0.0017	0.042	Multiple_Complex
TC1600011568.hg.1	transmembrane protein 231	TMEM231	2.22	7.47	6.31	0.46	0.81	T	T	0.0072	0.1172	Multiple_Complex
TC1200007931.hg.1	solute carrier family 16 (monocarboxylate transporter), member 7	SLC16A7	2.22	6.8	5.65	0.39	0.32	T	T	0.0491	0.3621	Multiple_Complex
TC1100010038.hg.1	suppression of tumorigenicity 5	ST5	2.22	6.55	5.4	0.61	0.09	T	T	0.0255	0.2554	Multiple_Complex
TC1200010842.hg.1	protein phosphatase 1, regulatory (inhibitor) subunit 1A	PPP1R1A	2.22	8.27	7.12	1.8	0.15	T	T	0.004	0.0778	Coding
TC0900007994.hg.1	PHD finger protein 2	PHF2	2.22	8.71	7.56	0.85	0.3	T	T	0.0089	0.1348	Multiple_Complex
TC0X00010648.hg.1	ribosomal protein L39; small nucleolar RNA, H/ACA box 69	RPL39; SNORA69	2.22	16.72	15.56	0.38	0.59	T	T	0.0022	0.0507	Multiple_Complex
TC0600007675.hg.1	bromodomain containing 2	BRD2	2.22	13.77	12.62	0.12	0.14	T	T	6.88e-06	0.0005	Multiple_Complex
TC0100010855.hg.1	N-acetylneuraminate pyruvate lyase (dihydrodipicolinate synthase)	NPL	2.22	6.51	5.36	0.48	0.5	T	T	0.0206	0.2258	Multiple_Complex
TC0100013632.hg.1	fibronectin type III domain containing 5	FNDC5	2.22	8.04	6.89	0.4	0.37	T	T	0.0022	0.0512	Multiple_Complex
TC0100014152.hg.1	Fas (TNFRSF6) associated factor 1	FAF1	2.22	14.4	13.25	0.07	0.28	T	T	0.0027	0.0597	Multiple_Complex
TC1200012777.hg.1		RP11-318G8.1	2.21	14.19	13.04	0.33	0.41	T	T	0.0017	0.0428	Multiple_Complex
TC0300009245.hg.1	ribosomal protein L21 pseudogene 42 [Source:HGNC Symbol;Acc:HGNC:37017]	RPL21P42	2.21	6.98	5.83	0.14	0.27	T	T	0.0074	0.1191	Multiple_Complex
TC1200012629.hg.1	DAZ associated protein 2	DAZAP2	2.21	13.67	12.52	0.2	0.67	T	T	0.0053	0.0947	Multiple_Complex
TC0300012189.hg.1	karyopherin alpha 1	KPNA1	2.21	11.9	10.75	0.27	0.27	T	T	4.14e-05	0.0023	Multiple_Complex
TC0400010167.hg.1	DDB1 and CUL4 associated factor 16	DCAF16	2.21	14.11	12.97	0.09	0.42	T	T	0.0009	0.0259	Multiple_Complex
TC0100015985.hg.1	mex-3 RNA binding family member A	MEX3A	2.21	7.44	6.29	0.55	0.25	T	T	0.0005	0.0163	Multiple_Complex
TC0700006781.hg.1	basic leucine zipper and W2 domains 2	BZW2	2.21	13.39	12.24	0.26	0.35	T	T	6.78e-05	0.0034	Multiple_Complex
TC1200010926.hg.1	bromodomain adjacent to zinc finger domain 2A	BAZ2A	2.21	13.65	12.51	0.53	0.31	T	T	0.0001	0.0065	Multiple_Complex
TC1400010625.hg.1	zinc finger protein 410	ZNF410	2.21	7.16	6.01	0.1	0.6	T	T	0.0032	0.0669	Multiple_Complex
TC1100010551.hg.1	TNF receptor-associated factor 6, E3 ubiquitin protein ligase	TRAF6	2.21	10.63	9.49	0.26	0.3	T	T	0.0002	0.0094	Multiple_Complex
TC0300013949.hg.1	SATB homeobox 1	SATB1	2.21	11.44	10.3	0.73	0.43	T	T	0.008	0.1257	Multiple_Complex
TC1200010812.hg.1	calcium binding and coiled-coil domain 1	CALCOCO1	2.2	7.3	6.16	0.36	0.84	T	T	0.0058	0.1008	Multiple_Complex
TC1900009850.hg.1	solute carrier family 1 (high affinity aspartate/glutamate transporter), member 6	SLC1A6	2.2	10.35	9.21	0.43	0.24	T	T	0.002	0.048	Multiple_Complex
TC0Y00006882.hg.1	solute carrier family 25 (mitochondrial carrier; adenine nucleotide translocator), member 6	SLC25A6	2.2	17.97	16.84	0.25	0.12	T	T	1.13e-05	0.0008	Multiple_Complex
TC0300011050.hg.1	glutaminyl-tRNA synthetase; microRNA 6890	QARS; MIR6890	2.2	15.52	14.39	0.11	0.18	T	T	0.0008	0.0247	Multiple_Complex
TC1700009303.hg.1	double C2-like domains, beta	DOC2B	2.2	5.59	4.45	0.69	0.1	T	T	0.002	0.0477	Multiple_Complex
TC0100017241.hg.1	transmembrane protein 206	TMEM206	2.2	10.78	9.64	0.31	0.6	T	T	0.0002	0.009	Multiple_Complex
TC1400010150.hg.1	ribosomal protein L3 pseudogene 4 [Source:HGNC Symbol;Acc:HGNC:19805]	RPL3P4	2.2	16.72	15.58	0.15	0.7	T	T	0.0146	0.1836	Multiple_Complex
TC0600011535.hg.1	ral guanine nucleotide dissociation stimulator-like 2	RGL2	2.2	12.35	11.21	0.34	0.41	T	T	6.48e-05	0.0033	Multiple_Complex
TC1900006524.hg.1	cold inducible RNA binding protein	CIRBP	2.2	14.41	13.27	0.1	0.54	T	T	0.003	0.063	Multiple_Complex
TC0X00009942.hg.1	praja ring finger 1, E3 ubiquitin protein ligase	PJA1	2.2	10.3	9.17	0.34	0.36	T	T	0.0034	0.0699	Multiple_Complex
TC0200013232.hg.1	succinate-CoA ligase, alpha subunit	SUCLG1	2.2	11.35	10.21	0.2	0.31	T	T	0.0017	0.0434	Multiple_Complex
TC1500010544.hg.1	NR2F2 antisense RNA 1	NR2F2-AS1	2.19	4.47	3.34	0.55	0.15	T	F	0.0037	0.0741	Multiple_Complex
TC2000008200.hg.1	PC-esterase domain containing 1A	PCED1A	2.19	11.8	10.66	0.51	0.5	T	T	0.0058	0.1011	Multiple_Complex
TC1900009287.hg.1	small integral membrane protein 24	SMIM24	2.19	8.11	6.98	0.76	0.33	T	T	0.0031	0.0654	Multiple_Complex
TC2200007776.hg.1	zinc finger, BED-type containing 4	ZBED4	2.19	11.85	10.72	0.55	0.31	T	T	0.0002	0.0096	Coding
TC0700011572.hg.1	scavenger receptor cysteine rich family, 4 domains	SSC4D	2.19	6.08	4.94	0.85	0.27	T	T	0.0139	0.1784	Multiple_Complex
TC1900011984.hg.1	dystrophia myotonica-protein kinase	DMPK	2.19	7.28	6.15	0.67	0.11	T	T	0.0004	0.0128	Multiple_Complex
TC0X00010366.hg.1	armadillo repeat containing, X-linked 6	ARMCX6	2.19	8.55	7.42	0.56	0.41	T	T	0.0036	0.0719	Multiple_Complex
TC0300013264.hg.1	guanine nucleotide binding protein (G protein), beta polypeptide 4	GNB4	2.19	13.79	12.66	0.31	0.66	T	T	0.0036	0.0718	Multiple_Complex
TC0300007050.hg.1	chromosome 3 open reading frame 35	C3orf35	2.19	5.85	4.72	0.32	0.96	T	T	0.0344	0.3016	Multiple_Complex
TC1000011429.hg.1		RP11-366I13.3	2.18	7.79	6.66	0.25	0.19	T	T	0.0054	0.0956	Multiple_Complex
TC1500008038.hg.1	aryl-hydrocarbon receptor nuclear translocator 2; microRNA 5572	ARNT2; MIR5572	2.18	9.05	7.92	0.96	0.77	T	T	0.0131	0.1718	Multiple_Complex
TC0600014099.hg.1	general transcription factor IIH subunit 4	GTF2H4	2.18	9.02	7.9	0.29	0.33	T	T	1.43e-05	0.001	Multiple_Complex
TC0300013921.hg.1	phosphatidylinositol glycan anchor biosynthesis class X	PIGX	2.18	10.5	9.37	0.11	0.67	T	T	0.0008	0.0246	Multiple_Complex
TC0900011582.hg.1	family with sequence similarity 129, member B	FAM129B	2.18	8.85	7.73	0.22	0.13	T	T	3.96e-05	0.0022	Multiple_Complex
TC0300012188.hg.1		RP11-299J3.6	2.18	10.15	9.03	0.38	0.98	T	T	0.016	0.1945	Multiple_Complex
TC1100012424.hg.1	SIK family kinase 3	SIK3	2.18	9.93	8.8	0.43	0.63	T	T	0.0003	0.0121	Multiple_Complex
TC0200011919.hg.1	lipid droplet associated hydrolase	LDAH	2.18	11.18	10.06	0.21	0.93	T	T	0.0066	0.11	Multiple_Complex
TC1200012571.hg.1	integrin alpha FG-GAP repeat containing 2	ITFG2	2.18	11	9.88	0.13	0.82	T	T	0.0048	0.0883	Multiple_Complex
TC1600010028.hg.1	chromosome 16 open reading frame 58	C16orf58	2.18	11.01	9.89	0.54	0.17	T	T	0.0066	0.1098	Multiple_Complex
TC0100007784.hg.1	argonaute RISC catalytic component 4	AGO4	2.18	8.95	7.82	0.28	0.53	T	T	0.0005	0.0178	Multiple_Complex
TC0700012596.hg.1	transmembrane protein 209	TMEM209	2.18	13.65	12.53	0.2	0.34	T	T	0.0023	0.0522	Multiple_Complex
TC0100015982.hg.1	signal sequence receptor, beta (translocon-associated protein beta)	SSR2	2.18	17.27	16.14	0.18	0.15	T	T	2.03e-06	0.0002	Multiple_Complex
TC1900008193.hg.1	LIPE antisense RNA 1	LIPE-AS1	2.17	6.18	5.06	0.14	0.12	T	T	0.0012	0.032	Multiple_Complex
TC1000012584.hg.1	ER lipid raft associated 1	ERLIN1	2.17	13.43	12.31	0.17	0.22	T	T	2.07e-05	0.0013	Multiple_Complex
TC0900007211.hg.1	SPATA31 subfamily A, member 1	SPATA31A1	2.17	5.05	3.92	0.31	0.51	T	T	0.0003	0.012	Multiple_Complex
TC0100009215.hg.1	cell division cycle 14A	CDC14A	2.17	12.58	11.46	0.03	0.12	T	T	0.0003	0.0117	Multiple_Complex
TC1900011901.hg.1	solute carrier family 35, member E1	SLC35E1	2.17	11.73	10.61	0.46	0.24	T	T	0.0009	0.0252	Multiple_Complex
TC0400008879.hg.1	GRB2-associated binding protein 1	GAB1	2.17	13.22	12.1	0.01	0.31	T	T	0.0018	0.0437	Multiple_Complex
TC1700007573.hg.1	ligase III, DNA, ATP-dependent	LIG3	2.17	11.45	10.33	0.13	0.17	T	T	3.12e-05	0.0018	Multiple_Complex
TC0100018472.hg.1	SEC22 homolog B, vesicle trafficking protein (gene/pseudogene)	SEC22B	2.17	12.59	11.47	0.16	0.4	T	T	5.41e-05	0.0028	Multiple_Complex
TC0600012863.hg.1	REV3 like, DNA directed polymerase zeta catalytic subunit	REV3L	2.17	8.52	7.41	0.17	0.12	T	T	0.0185	0.2122	Multiple_Complex
TC0200012804.hg.1	vacuolar protein sorting 54 homolog (S. cerevisiae)	VPS54	2.17	8.5	7.38	0.17	0.59	T	T	0.0247	0.2507	Multiple_Complex
TC0400007264.hg.1	Kruppel-like factor 3 (basic)	KLF3	2.17	12.83	11.71	0.79	0.12	T	T	0.001	0.0283	Multiple_Complex
TC1900006727.hg.1	ubiquitin-like with PHD and ring finger domains 1	UHRF1	2.17	10.38	9.26	1.43	0.64	T	T	0.0164	0.1977	Multiple_Complex
TC0800009247.hg.1	heat shock transcription factor 1	HSF1	2.17	9.95	8.83	0.09	0.29	T	T	9.47e-05	0.0045	Multiple_Complex
TC0200013765.hg.1	UDP-glucuronate decarboxylase 1	UXS1	2.17	11.02	9.91	0.3	0.72	T	T	0.0106	0.1499	Multiple_Complex
TC1300006628.hg.1	solute carrier family 25 (mitochondrial carrier; ornithine transporter) member 15 pseudogene 3 [Source:HGNC Symbol;Acc:HGNC:39844]	SLC25A15P3	2.17	10.59	9.47	0.26	0.29	T	T	0.0066	0.1108	Multiple_Complex
TC1700010274.hg.1	bleomycin hydrolase	BLMH	2.17	12.92	11.81	0.45	0.39	T	T	0.0028	0.0598	Multiple_Complex
TC1700012439.hg.1	ring finger protein 43	RNF43	2.16	6.77	5.65	0.61	0.41	T	T	0.0137	0.1765	Multiple_Complex
TC0900007288.hg.1	SPATA31 subfamily A, member 6	SPATA31A6	2.16	5.53	4.42	0.03	0.15	T	T	0.0029	0.0627	Multiple_Complex
TC0X00007107.hg.1	KRAB box domain containing 4	KRBOX4	2.16	9.66	8.54	0.22	0.66	T	T	0.002	0.048	Multiple_Complex
TC0600014270.hg.1	G-protein signaling modulator 3	GPSM3	2.16	6.22	5.11	0.5	0.28	T	T	0.0321	0.2896	Coding
TC0900008318.hg.1	transmembrane protein 38B	TMEM38B	2.16	11.06	9.95	0.25	0.81	T	T	0.0004	0.0138	Multiple_Complex
TC1900011030.hg.1	solute carrier family 8 (sodium/calcium exchanger), member 2	SLC8A2	2.16	9.73	8.62	1.61	0.29	T	T	0.0322	0.29	Multiple_Complex
TC2000006551.hg.1	attractin	ATRN	2.16	12.47	11.36	0.26	0.61	T	T	0.0009	0.0266	Multiple_Complex
TC1300008916.hg.1	calcium binding protein 39-like	CAB39L	2.16	8.55	7.44	1.22	0.15	T	T	0.0193	0.2172	Multiple_Complex
TC1500010106.hg.1	tetraspanin 3	TSPAN3	2.16	13.79	12.68	0.01	0.55	T	T	0.0002	0.0087	Multiple_Complex
TC1100009165.hg.1		RP11-109L13.1	2.16	10.09	8.98	0.32	0.24	T	T	0.0005	0.0161	Multiple_Complex
TC0100011721.hg.1	calpain 2, (m/II) large subunit	CAPN2	2.16	13.62	12.51	0.39	0.46	T	T	2.82e-05	0.0017	Multiple_Complex
TC2000009461.hg.1	ATPase, class II, type 9A	ATP9A	2.16	7.39	6.28	0.09	0.13	T	T	0.0033	0.0687	Multiple_Complex
TC0100008766.hg.1		RP4-595K12.1	2.16	10.94	9.84	0.33	0.43	T	T	0.0274	0.2653	Multiple_Complex
TC0800009231.hg.1	glutamate receptor, ionotropic, N-methyl D-aspartate-associated protein 1 (glutamate binding)	GRINA	2.16	10.4	9.29	0.84	0.55	T	T	0.0014	0.0373	Multiple_Complex
TC0300014031.hg.1	coiled-coil domain containing 80; long intergenic non-protein coding RNA 1279	CCDC80; LINC01279	2.16	7.74	6.63	1.07	0.87	T	T	0.0093	0.1379	Multiple_Complex
TC1500009782.hg.1	programmed cell death 7	PDCD7	2.15	12.33	11.22	0.18	0.49	T	T	0.0002	0.0086	Multiple_Complex
TC1900007425.hg.1	regulatory factor X-associated ankyrin-containing protein	RFXANK	2.15	10.99	9.89	0.22	0.41	T	T	0.003	0.0631	Multiple_Complex
TC1600009959.hg.1	SMG1 pseudogene 5	SMG1P5	2.15	14.14	13.03	0.35	0.49	T	T	0.001	0.0275	Multiple_Complex
TC1100012981.hg.1	reticulocalbin 1, EF-hand calcium binding domain	RCN1	2.15	16.18	15.08	0.13	0.25	T	T	0.0002	0.0066	Multiple_Complex
TC1300009505.hg.1	ATP binding cassette subfamily C member 4	ABCC4	2.15	10.56	9.45	0.1	0.38	T	T	0.0019	0.0458	Multiple_Complex
TC1900006628.hg.1	nuclear factor I/C (CCAAT-binding transcription factor)	NFIC	2.15	6.28	5.17	0.58	0.25	T	T	0.0061	0.1044	Multiple_Complex
TC0700008097.hg.1		AC004980.8	2.15	7.84	6.73	0.38	0.31	T	T	0.0055	0.0969	Multiple_Complex
TC0300009731.hg.1	mitogen-activated protein kinase kinase kinase 13	MAP3K13	2.15	6.59	5.49	1	0.7	T	T	0.012	0.1629	Multiple_Complex
TC0700009065.hg.1	coiled-coil domain containing 136	CCDC136	2.15	9.54	8.44	0.27	0.82	T	T	0.001	0.0281	Multiple_Complex
TC1700007135.hg.1	tripartite motif containing 16-like	TRIM16L	2.15	7.8	6.7	0.34	0.31	T	T	6.42e-05	0.0033	Multiple_Complex
TC0X00011337.hg.1	WAS protein family homolog 6 pseudogene	WASH6P	2.15	10.53	9.43	0.12	0.22	T	T	0.0017	0.0423	Multiple_Complex
TC1200009580.hg.1	F-box and leucine-rich repeat protein 14	FBXL14	2.15	10.98	9.88	0.78	0.67	T	T	0.0319	0.2887	Multiple_Complex
TC0100015951.hg.1	secretory carrier membrane protein 3	SCAMP3	2.15	11.79	10.68	0.74	0.24	T	T	0.0053	0.0946	Multiple_Complex
TC0200015246.hg.1	signal transducer and activator of transcription 4	STAT4	2.15	5.67	4.56	0.83	0.73	T	F	0.0113	0.1567	Multiple_Complex
TC1500007060.hg.1	microtubule associated protein 1A	MAP1A	2.15	5.52	4.42	0.63	0.4	T	F	0.0027	0.0585	Multiple_Complex
TC0500009400.hg.1	Kv channel interacting protein 1	KCNIP1	2.15	7.49	6.39	0.99	0.69	T	T	0.0429	0.3373	Multiple_Complex
TC1200009566.hg.1	RAD52 homolog, DNA repair protein	RAD52	2.15	10.21	9.11	0.76	0.96	T	T	0.0111	0.1546	Multiple_Complex
TC1900010010.hg.1	ribosomal protein L39 pseudogene 38	RPL39P38	2.15	11.59	10.49	0.16	0.5	T	T	0.0129	0.1705	Multiple_Complex
TC0400007823.hg.1	novel transcript; Small nucleolar RNA SNORA3/SNORA45 family [Source:RFAM;Acc:RF00334]	RP11-692D12.1; SNORA3	2.15	5.34	4.24	0.54	0.83	T	T	0.0142	0.1804	Multiple_Complex
TC0200011068.hg.1		AC104634.3	2.14	8.05	6.95	0.28	0.42	T	T	0.0005	0.0162	Multiple_Complex
TC0200009091.hg.1	v-ral simian leukemia viral oncogene homolog B	RALB	2.14	10.59	9.49	0.36	0.84	T	T	0.0002	0.0072	Multiple_Complex
TC0400012326.hg.1		RP11-366M4.1	2.14	10.15	9.06	0.26	0.23	T	T	0.0022	0.0517	Multiple_Complex
TC2000008473.hg.1	kinesin family member 16B	KIF16B	2.14	9.51	8.41	0.35	0.28	T	T	0.0066	0.1108	Multiple_Complex
TC1700009649.hg.1	fragile X mental retardation, autosomal homolog 2	FXR2	2.14	11	9.9	0.3	0.16	T	T	0.013	0.171	Multiple_Complex
TC0100015082.hg.1	diphthamide biosynthesis 5	DPH5	2.14	11.67	10.57	0.16	0.3	T	T	0.0034	0.069	Multiple_Complex
TC1000008045.hg.1	SEC24 homolog C, COPII coat complex component	SEC24C	2.14	10.68	9.59	0.37	0.2	T	T	0.0018	0.0449	Multiple_Complex
TC0100013983.hg.1	transmembrane protein 53	TMEM53	2.14	8.25	7.16	1.16	0.92	T	T	0.0414	0.3313	Multiple_Complex
TC1100010058.hg.1	DENN/MADD domain containing 5A	DENND5A	2.13	10.29	9.2	0.06	0.29	T	T	0.0005	0.0174	Multiple_Complex
TC0900012156.hg.1	paralemmin 2	PALM2	2.13	6.49	5.4	0.59	0.35	T	T	0.0013	0.0348	Multiple_Complex
TC1100011109.hg.1	small nucleolar RNA, C/D box 22; small nucleolar RNA, C/D box 29; small nucleolar RNA, C/D box 31; small nucleolar RNA, C/D box 30; small nucleolar RNA, C/D box 28; small nucleolar RNA, C/D box 27; small nucleolar RNA, C/D box 26; small nucleolar RNA, C/D box 25; small nucleolar RNA host gene 1	SNORD22; SNORD29; SNORD31; SNORD30; SNORD28; SNORD27; SNORD26; SNORD25; SNHG1	2.13	15.56	14.46	0.16	0.27	T	T	0.0008	0.0235	Multiple_Complex
TC1600008759.hg.1		RP11-178L8.1	2.13	10.37	9.28	0.06	0.19	T	T	0.0139	0.1779	Multiple_Complex
TC0100007574.hg.1	erythrocyte membrane protein band 4.1	EPB41	2.13	14.87	13.78	0.34	0.4	T	T	0.0007	0.0228	Multiple_Complex
TC0700011977.hg.1	galactose-3-O-sulfotransferase 4	GAL3ST4	2.13	7.17	6.08	0.34	0.26	T	T	0.0036	0.072	Multiple_Complex
TC0300006702.hg.1	calpain 7	CAPN7	2.13	10.69	9.6	0.23	0.47	T	T	0.0281	0.2695	Multiple_Complex
TC1300008766.hg.1	ecto-NOX disulfide-thiol exchanger 1	ENOX1	2.13	8.13	7.04	0.48	0.6	T	T	0.0009	0.0274	Multiple_Complex
TC0100010301.hg.1	VANGL planar cell polarity protein 2	VANGL2	2.13	12.11	11.02	0.66	0.36	T	T	0.0046	0.0868	Multiple_Complex
TC0400009107.hg.1		RP11-612J15.3	2.13	5.84	4.75	0.31	0.08	T	T	0.0125	0.1668	Multiple_Complex
TC0700009352.hg.1	thromboxane A synthase 1 (platelet)	TBXAS1	2.13	5.37	4.29	0.4	0.32	T	F	0.0017	0.0429	Multiple_Complex
TC0100017896.hg.1		RP11-307O1.1	2.13	14.55	13.46	0.27	0.53	T	T	0.008	0.1248	Multiple_Complex
TC1500009804.hg.1	DENN/MADD domain containing 4A	DENND4A	2.13	9.04	7.95	0.61	0.41	T	T	0.0379	0.3174	Multiple_Complex
TC0900011220.hg.1	sushi domain containing 1	SUSD1	2.12	6.99	5.9	0.29	0.42	T	T	0.0013	0.0349	Multiple_Complex
TC0700010949.hg.1	small nucleolar RNA, H/ACA box 5C	SNORA5C	2.12	8.08	6.99	0.37	0.23	T	T	0.0004	0.0128	Multiple_Complex
TC0X00010112.hg.1	tetratricopeptide repeat domain 3 pseudogene 1	TTC3P1	2.12	6.95	5.86	0.66	0.58	T	T	0.0247	0.2505	Multiple_Complex
TC0100018486.hg.1	CDC42 small effector 1	CDC42SE1	2.12	13.24	12.15	0.3	0.14	T	T	3.13e-06	0.0003	Multiple_Complex
TC1700012304.hg.1	component of oligomeric golgi complex 1	COG1	2.12	10.33	9.24	0.25	0.56	T	T	0.0081	0.1263	Multiple_Complex
TC1400010071.hg.1	calmin (calponin-like, transmembrane)	CLMN	2.12	8.6	7.51	0.39	0.4	T	T	0.0007	0.0216	Multiple_Complex
TC0200009125.hg.1	RNA, U4atac small nuclear (U12-dependent splicing)	RNU4ATAC	2.12	15.35	14.27	0.28	0.79	T	T	0.0131	0.1718	Multiple_Complex
TC1700011260.hg.1	myotubularin related protein 4	MTMR4	2.12	12.1	11.01	0.15	0.24	T	T	0.0004	0.015	Multiple_Complex
TC1000008359.hg.1	cofilin 1 (non-muscle) pseudogene 1	CFL1P1	2.12	5.8	4.71	0.68	0.2	T	F	0.0003	0.0105	Multiple_Complex
TC0100006801.hg.1	nicotinamide nucleotide adenylyltransferase 1	NMNAT1	2.12	8.1	7.01	0.33	0.53	T	T	0.0105	0.1492	Multiple_Complex
TC2000007300.hg.1	regulation of nuclear pre-mRNA domain containing 1B	RPRD1B	2.12	11.51	10.43	0.06	0.09	T	T	0.0001	0.0058	Multiple_Complex
TC0Y00007235.hg.1	transcription elongation factor B (SIII), polypeptide 1 pseudogene 10 [Source:HGNC Symbol;Acc:HGNC:38146]	TCEB1P10	2.12	4.77	3.69	0.52	0.74	F	F	0.0262	0.2595	Multiple_Complex
TC0700010005.hg.1	zinc finger, AN1-type domain 2A	ZFAND2A	2.12	8.57	7.49	0.47	0.28	T	T	0.0008	0.0243	Multiple_Complex
TC0100018265.hg.1	glutathione S-transferase mu 5	GSTM5	2.12	7.33	6.25	0.32	0.36	T	T	0.01	0.1452	Multiple_Complex
TC0100015521.hg.1	Homo sapiens lymphocyte-specific protein 1 pseudogene (LOC645166), transcript variant 1, non-coding RNA.; lymphocyte-specific protein 1 pseudogene	LOC645166; RP11-14N7.2	2.12	5.09	4.01	0.29	0.33	T	T	0.0167	0.1993	Multiple_Complex
TC0900009073.hg.1	ribosomal protein L7a; small nucleolar RNA, C/D box 36C; small nucleolar RNA, C/D box 36B; small nucleolar RNA, C/D box 24; small nucleolar RNA, C/D box 36A	RPL7A; SNORD36C; SNORD36B; SNORD24; SNORD36A	2.12	16.6	15.52	0.19	0.07	T	T	7.89e-05	0.0039	Multiple_Complex
TC0100018221.hg.1	chromosome 1 open reading frame 50	C1orf50	2.12	8.25	7.17	0.94	0.57	T	T	0.0039	0.0772	Multiple_Complex
TC0300007482.hg.1	nischarin	NISCH	2.12	11.29	10.2	0.13	0.11	T	T	0.0018	0.0448	Multiple_Complex
TC0100011148.hg.1	calmodulin regulated spectrin-associated protein family, member 2	CAMSAP2	2.12	11.35	10.27	0.17	0.49	T	T	0.0436	0.3408	Multiple_Complex
TC1700006770.hg.1	dynein, axonemal, heavy chain 2	DNAH2	2.12	5.24	4.16	0.3	0.45	T	T	0.0015	0.0396	Multiple_Complex
TC0900007540.hg.1	ribosomal protein L35a pseudogene 21 [Source:HGNC Symbol;Acc:HGNC:36814]	RPL35AP21	2.12	8.8	7.72	0.35	0.35	T	T	0.0025	0.0561	Multiple_Complex
TC1200009362.hg.1	transmembrane protein 132C	TMEM132C	2.12	4.72	3.64	0.75	0.02	T	F	0.0367	0.3119	Coding
TC1500009109.hg.1	chromosome 15 open reading frame 57; mitochondrial ribosomal protein L42 pseudogene 5	C15orf57; MRPL42P5	2.12	10.77	9.69	0.15	0.33	T	T	0.0046	0.0859	Multiple_Complex
TC0900010063.hg.1	contactin associated protein-like 3	CNTNAP3	2.12	6.96	5.88	0.41	0.39	T	T	0.0468	0.353	Multiple_Complex
TC2000007105.hg.1	transmembrane 9 superfamily protein member 4	TM9SF4	2.11	15.14	14.06	0.39	0.41	T	T	0.0001	0.005	Multiple_Complex
TC1200008332.hg.1	ribosomal protein L6 pseudogene 25	RPL6P25	2.11	7.26	6.18	0.32	0.14	T	T	0.0015	0.0395	Multiple_Complex
TC0X00009977.hg.1	sorting nexin 12	SNX12	2.11	11.03	9.95	0.06	0.43	T	T	0.0002	0.0067	Multiple_Complex
TC1200007897.hg.1	tetraspanin 31	TSPAN31	2.11	13.08	12	0.32	0.1	T	T	0.0087	0.1322	Multiple_Complex
TC1600010116.hg.1		RP11-598D12.1	2.11	7.38	6.3	0.17	0.33	T	T	0.0006	0.0189	Multiple_Complex
TC1700012324.hg.1	active BCR-related	ABR	2.11	8.51	7.44	0.4	0.71	T	T	0.0194	0.2182	Multiple_Complex
TC0200016705.hg.1	RNF103-CHMP3 readthrough; charged multivesicular body protein 3	RNF103-CHMP3; CHMP3	2.11	9.88	8.8	0.8	0.5	T	T	0.0007	0.0218	Coding
TC0800006978.hg.1	polymerase (RNA) III (DNA directed) polypeptide D, 44kDa	POLR3D	2.11	12.8	11.72	0.26	0.05	T	T	0.0016	0.0399	Multiple_Complex
TC1200010838.hg.1	zinc finger protein 385A	ZNF385A	2.11	8.86	7.78	0.6	0.28	T	T	0.0091	0.1368	Multiple_Complex
TC1100008181.hg.1	LDL receptor related protein 5	LRP5	2.11	9.16	8.08	0.61	0.38	T	T	0.0075	0.12	Multiple_Complex
TC1700007099.hg.1	developmentally regulated GTP binding protein 2	DRG2	2.11	9.34	8.27	0.08	0.29	T	T	0.0051	0.0927	Multiple_Complex
TC1400010754.hg.1	chromosome 14 open reading frame 37	C14orf37	2.11	7.43	6.36	0.14	0.09	T	T	0.0051	0.0922	Multiple_Complex
TC1700007911.hg.1		CTD-3193K9.1	2.11	8.89	7.82	0.08	0.49	T	T	0.0004	0.0145	Multiple_Complex
TC0200014288.hg.1	family with sequence similarity 168, member B	FAM168B	2.11	12.06	10.98	0.28	0.22	T	T	0.0003	0.0124	Multiple_Complex
TC0700011642.hg.1	hepatocyte growth factor (hepapoietin A; scatter factor)	HGF	2.11	6.15	5.08	0.04	0.25	T	F	0.0003	0.011	Multiple_Complex
TC1000007270.hg.1	peroxiredoxin 2 pseudogene 2 [Source:HGNC Symbol;Acc:HGNC:44967]	PRDX2P2	2.11	4.88	3.81	0.21	0.21	T	T	0.0034	0.0703	Multiple_Complex
TC1700007910.hg.1	contactin associated protein 1	CNTNAP1	2.11	7.11	6.04	1	0.41	T	T	0.0021	0.0496	Multiple_Complex
TC1600008932.hg.1	LUC7-like	LUC7L	2.1	11.8	10.73	0.05	0.33	T	T	0.0056	0.0992	Multiple_Complex
TC0400007200.hg.1		RP11-79E3.1	2.1	7.91	6.84	0.07	0.08	T	T	3.68e-06	0.0003	Multiple_Complex
TC0100014048.hg.1	protein O-linked mannose N-acetylglucosaminyltransferase 1 (beta 1,2-)	POMGNT1	2.1	9.23	8.16	0.65	0.1	T	T	0.0054	0.0963	Multiple_Complex
TC2000008946.hg.1	gamma-glutamyltransferase 7	GGT7	2.1	7.62	6.55	0.33	0.11	T	T	0.0048	0.0883	Multiple_Complex
TC0900009127.hg.1	collagen, type V, alpha 1	COL5A1	2.1	7.18	6.11	0.31	0.39	T	T	0.0004	0.0145	Multiple_Complex
TC0900011396.hg.1	RAB14, member RAS oncogene family	RAB14	2.1	13.11	12.04	0.27	0.31	T	T	0.0001	0.0063	Coding
TC1900010466.hg.1	leucine-rich repeat LGI family, member 4	LGI4	2.1	6.78	5.71	1.51	0.07	T	T	0.0017	0.0419	Multiple_Complex
TC0700006645.hg.1	ubiquitin specific peptidase 42	USP42	2.1	13.23	12.16	0.27	0.32	T	T	0.0013	0.0341	Multiple_Complex
TC2000009070.hg.1	small nucleolar RNA, H/ACA box 71A; small nucleolar RNA host gene 17	SNORA71A; SNHG17	2.1	11.63	10.56	0.29	0.35	T	T	0.0197	0.2201	Multiple_Complex
TC1500010275.hg.1	golgin A2 pseudogene 7	GOLGA2P7	2.1	12.19	11.13	0.41	0.34	T	T	0.0001	0.0048	Multiple_Complex
TC1700010545.hg.1	phosphatidylinositol-5-phosphate 4-kinase, type II, beta	PIP4K2B	2.1	10.69	9.62	0.51	0.26	T	T	0.0002	0.0094	Multiple_Complex
TC1000009092.hg.1	inositol polyphosphate-5-phosphatase F	INPP5F	2.1	16.35	15.29	0.36	0.78	T	T	0.0231	0.2415	Multiple_Complex
TC0300011124.hg.1	cytokine inducible SH2-containing protein	CISH	2.09	6.58	5.51	0.36	0.31	T	T	0.0014	0.037	Multiple_Complex
TC0500009587.hg.1	HIG1 hypoxia inducible domain family, member 2A	HIGD2A	2.09	12.35	11.29	0.5	0.42	T	T	0.0008	0.0245	Multiple_Complex
TC0800008295.hg.1	phosphatidylserine synthase 1	PTDSS1	2.09	12.58	11.51	0.27	0.46	T	T	6.11e-05	0.0031	Multiple_Complex
TC0700011961.hg.1	gap junction protein gamma 3	GJC3	2.09	6.85	5.79	0.29	0.33	T	T	0.0084	0.1295	Coding
TC1000011555.hg.1	MORN repeat containing 4	MORN4	2.09	10.11	9.04	0.38	0.48	T	T	0.0019	0.0451	Multiple_Complex
TC0300014064.hg.1	profilin 2	PFN2	2.09	14.34	13.28	0.19	0.43	T	T	0.0005	0.0163	Multiple_Complex
TC0800007004.hg.1	Rho-related BTB domain containing 2	RHOBTB2	2.09	8.41	7.34	0.57	0.24	T	T	0.0039	0.0773	Multiple_Complex
TC1500009298.hg.1	solute carrier family 30 (zinc transporter), member 4	SLC30A4	2.09	5.98	4.91	0.3	0.49	T	F	0.0015	0.0391	Multiple_Complex
TC0600013800.hg.1	parkin RBR E3 ubiquitin protein ligase	PARK2	2.09	7.08	6.02	0.2	0.48	T	T	0.0018	0.0439	Coding
TC0300013829.hg.1	RNA binding motif protein 5	RBM5	2.09	13.92	12.86	0.04	0.5	T	T	0.0003	0.0123	Multiple_Complex
TC0700013575.hg.1	stromal antigen 3-like 3 (pseudogene); stromal antigen 3-like 2 (pseudogene)	STAG3L3; STAG3L2	2.09	11.84	10.78	0.12	0.32	T	T	6.79e-05	0.0034	Multiple_Complex
TC1000010536.hg.1	glutamate dehydrogenase 1 pseudogene 7	GLUD1P7	2.09	12.11	11.05	0.63	0.25	T	T	0.0007	0.0207	Multiple_Complex
TC1400008362.hg.1	TNF receptor-associated factor 3	TRAF3	2.09	10.76	9.69	0.21	0.18	T	T	0.0003	0.0113	Multiple_Complex
TC1700007811.hg.1	transmembrane protein 99	TMEM99	2.09	8.43	7.37	0.37	0.29	T	T	0.0007	0.0225	Multiple_Complex
TC2000008721.hg.1	adipocyte plasma membrane associated protein	APMAP	2.09	11.68	10.62	0.21	0.61	T	T	0.0003	0.0126	Multiple_Complex
TC0100011384.hg.1	mitogen-activated protein kinase-activated protein kinase 2	MAPKAPK2	2.09	12.42	11.36	0.48	0.41	T	T	9.87e-05	0.0046	Multiple_Complex
TC1700007944.hg.1	transmembrane protein 106A	TMEM106A	2.09	8.53	7.47	0.56	0.16	T	T	0.0035	0.0708	Multiple_Complex
TC1500010772.hg.1	chondroitin sulfate proteoglycan 4 pseudogene 13 [Source:HGNC Symbol;Acc:HGNC:49195]	CSPG4P13	2.09	7.57	6.51	0.6	0.2	T	T	8.05e-05	0.0039	Multiple_Complex
TC1600011426.hg.1	ataxin 1-like	ATXN1L	2.08	9.72	8.66	0.17	0.4	T	T	0.0221	0.2348	Multiple_Complex
TC2200006950.hg.1	SRR1 domain containing	SRRD	2.08	12.21	11.15	0.42	0.35	T	T	0.0005	0.0156	Multiple_Complex
TC2200008831.hg.1	phosphomannomutase 1	PMM1	2.08	6.67	5.62	0.77	0.39	T	T	0.0042	0.0806	Multiple_Complex
TC0900008238.hg.1	muscle-related coiled-coil protein	MURC	2.08	7.3	6.25	0.19	0.99	T	T	0.0235	0.2432	Coding
TC0100011487.hg.1	TNF receptor-associated factor 5	TRAF5	2.08	9.39	8.33	0.25	0.7	T	T	0.0229	0.2398	Multiple_Complex
TC0300011038.hg.1	solute carrier family 25 (carnitine/acylcarnitine translocase), member 20	SLC25A20	2.08	6.38	5.33	0.76	0.32	T	T	0.0005	0.018	Multiple_Complex
TC0200009991.hg.1		RP11-1O7.1	2.08	9.97	8.91	0.19	0.74	T	T	0.0454	0.3479	Multiple_Complex
TC1400010339.hg.1	chromosome 14 open reading frame 2	C14orf2	2.08	14.32	13.26	0.36	0.1	T	T	3.36e-05	0.0019	Multiple_Complex
TC0200016720.hg.1	ring finger protein 149	RNF149	2.08	10.04	8.99	0.23	0.48	T	T	0.0095	0.1404	Multiple_Complex
TC0400012798.hg.1	adhesion G protein-coupled receptor L3	ADGRL3	2.07	10.41	9.36	0.19	0.72	T	T	0.0354	0.3059	Multiple_Complex
TC0800007110.hg.1	epoxide hydrolase 2, cytoplasmic	EPHX2	2.07	7.45	6.4	0.27	0.65	T	T	0.0224	0.2369	Multiple_Complex
TC0900010808.hg.1	bicaudal D homolog 2 (Drosophila)	BICD2	2.07	6.53	5.48	0.34	0.09	T	T	0.0022	0.0508	Multiple_Complex
TC1300007152.hg.1	fibronectin type III domain containing 3A	FNDC3A	2.07	11.8	10.75	0.09	0.42	T	T	0.0381	0.3183	Multiple_Complex
TC1500008448.hg.1		RP11-522B15.1	2.07	7.09	6.04	0.54	0.33	T	T	0.0197	0.2198	Multiple_Complex
TC1700008954.hg.1	small nucleolar RNA, C/D box 1A; small nucleolar RNA, C/D box 1C; small nucleolar RNA host gene 16	SNORD1A; SNORD1C; SNHG16	2.07	16.26	15.21	0.29	0.6	T	T	0.0003	0.0099	Multiple_Complex
TC0700007244.hg.1	STARD3 N-terminal like	STARD3NL	2.07	11.87	10.82	0.37	0.5	T	T	0.0039	0.0772	Multiple_Complex
TC0100016162.hg.1	UDP-Gal:betaGlcNAc beta 1,4- galactosyltransferase, polypeptide 3	B4GALT3	2.07	10.77	9.72	0.03	0.08	T	T	0.0002	0.0074	Multiple_Complex
TC0100007191.hg.1	phospholipase A2, group IIF	PLA2G2F	2.07	5.18	4.14	0.41	0.58	T	T	0.0403	0.3271	Multiple_Complex
TC1500008143.hg.1		AC243562.1	2.07	7.79	6.74	0.2	0.41	T	T	0.0008	0.0231	Multiple_Complex
TC1700007630.hg.1	TBC1 domain family, member 3G	TBC1D3G	2.06	8.21	7.16	0.6	0.43	T	T	0.0371	0.314	Coding
TC0400012804.hg.1	UDP glucuronosyltransferase 2 family, polypeptide B25 pseudogene [Source:HGNC Symbol;Acc:HGNC:12549]	UGT2B25P	2.06	4.84	3.8	0.22	0.47	T	F	0.0275	0.2659	Multiple_Complex
TC0300012397.hg.1	plexin D1	PLXND1	2.06	8.69	7.65	0.4	0.38	T	T	0.0082	0.1272	Multiple_Complex
TC0700011982.hg.1	GATS, stromal antigen 3 opposite strand	GATS	2.06	11.19	10.15	0.3	0.25	T	T	0.0035	0.0708	Multiple_Complex
TC0400012759.hg.1	family with sequence similarity 193, member A	FAM193A	2.06	11.07	10.02	0.3	0.58	T	T	0.0007	0.0207	Multiple_Complex
TC0100006851.hg.1	ribosomal protein L39 pseudogene 6 [Source:HGNC Symbol;Acc:HGNC:35803]	RPL39P6	2.06	9.6	8.56	0.32	0.14	T	T	0.0101	0.1455	Multiple_Complex
TC1700011953.hg.1	chromobox homolog 4	CBX4	2.06	8.46	7.41	0.76	0.45	T	T	0.0028	0.0613	Multiple_Complex
TC0700012977.hg.1		RP4-800G7.1	2.06	16.47	15.43	0.09	0.36	T	T	0.0005	0.0175	Multiple_Complex
TC0X00008298.hg.1	glutamate dehydrogenase 2	GLUD2	2.06	9.23	8.19	0.43	0.19	T	T	0.001	0.0284	Multiple_Complex
TC2000006830.hg.1	microRNA 3192	MIR3192	2.06	7.93	6.89	0.36	0.38	T	T	0.0185	0.2125	Multiple_Complex
TC0300011152.hg.1	dual specificity phosphatase 7	DUSP7	2.06	8.46	7.41	0.78	0.84	T	T	0.0284	0.2712	Multiple_Complex
TC1000008585.hg.1	MARVEL domain containing 1	MARVELD1	2.06	9.26	8.22	0.47	0.43	T	T	0.0031	0.0652	Multiple_Complex
TC0200006953.hg.1	succinate dehydrogenase complex subunit C pseudogene 3 [Source:HGNC Symbol;Acc:HGNC:45178]	SDHCP3	2.06	7.14	6.1	0.35	0.11	T	T	0.0003	0.0111	Multiple_Complex
TC1900007279.hg.1	chromosome 19 open reading frame 44	C19orf44	2.06	8.04	7	0.07	0.24	T	T	0.0001	0.0065	Multiple_Complex
TC0100016973.hg.1	cytochrome b5 reductase 1	CYB5R1	2.06	8.87	7.83	0.49	0.27	T	T	0.0236	0.2437	Multiple_Complex
TC1900010508.hg.1	CAP-GLY domain containing linker protein 3	CLIP3	2.06	7.12	6.08	0.73	0.05	T	T	0.0234	0.243	Multiple_Complex
TC1600009412.hg.1	thioredoxin domain containing 11	TXNDC11	2.06	9.46	8.42	0.56	0.9	T	T	0.0327	0.2928	Multiple_Complex
TC0800012213.hg.1	vacuolar protein sorting 28 homolog (S. cerevisiae)	VPS28	2.06	10.17	9.13	0.41	0.55	T	T	0.0077	0.1217	Multiple_Complex
TC1700010515.hg.1	TBC1 domain family, member 3	TBC1D3	2.05	9.29	8.25	0.35	0.33	T	T	0.0445	0.3441	Coding
TC1700010590.hg.1	gasdermin B	GSDMB	2.05	8.06	7.03	0.37	0.27	T	T	0.0491	0.3624	Multiple_Complex
TC1000010509.hg.1	ArfGAP with GTPase domain, ankyrin repeat and PH domain 4	AGAP4	2.05	12.47	11.43	0.44	0.39	T	T	0.0262	0.2591	Multiple_Complex
TC0700013419.hg.1	actin related protein 2/3 complex subunit 1A	ARPC1A	2.05	14.3	13.26	0.13	0.4	T	T	0.0002	0.009	Multiple_Complex
TC1500007839.hg.1	immunoglobulin superfamily containing leucine-rich repeat	ISLR	2.05	6.56	5.52	0.93	0.1	T	T	0.0116	0.1589	Multiple_Complex
TC0200015019.hg.1	KIAA1715	KIAA1715	2.05	8.93	7.89	0.18	1.14	T	T	0.0311	0.285	Multiple_Complex
TC0700008625.hg.1	PRKR interacting protein 1 (IL11 inducible)	PRKRIP1	2.05	10.17	9.13	0.21	0.53	T	T	0.0014	0.0377	Multiple_Complex
TC1900006499.hg.1	AT rich interactive domain 3A (BRIGHT-like)	ARID3A	2.05	13.53	12.5	0.37	0.13	T	T	0.0013	0.0349	Multiple_Complex
TC0100014953.hg.1		RP4-717I23.2	2.05	13.5	12.47	0.12	0.21	T	T	0.0007	0.0219	Multiple_Complex
TC0300013417.hg.1	lipase, member H	LIPH	2.05	6.01	4.97	1.5	0.55	T	T	0.0057	0.0998	Multiple_Complex
TC0700009691.hg.1	acid sensing ion channel 3	ASIC3	2.05	5.16	4.12	0.65	0.14	T	T	0.0007	0.0227	Multiple_Complex
TC1900010369.hg.1		CTD-2085J24.5	2.05	5.43	4.39	0.38	0.21	T	T	0.0007	0.021	Multiple_Complex
TC1000008502.hg.1	TBC1 domain family, member 12	TBC1D12	2.05	6.76	5.72	0.48	0.35	T	T	0.0012	0.034	Multiple_Complex
TC0800009927.hg.1	early B-cell factor 2	EBF2	2.05	5.01	3.98	0.71	0.39	T	T	0.0174	0.2038	Multiple_Complex
TC0X00009007.hg.1	pseudouridine 5-phosphatase	PUDP	2.05	12.17	11.14	0.67	0.18	T	T	0.0106	0.1499	Multiple_Complex
TC0100013028.hg.1	EPH receptor A2	EPHA2	2.05	8.05	7.02	0.88	0.1	T	T	0.0185	0.2122	Multiple_Complex
TC0200010518.hg.1	abl-interactor 2	ABI2	2.04	13.01	11.98	0.28	0.24	T	T	4.64e-05	0.0025	Multiple_Complex
TC1700008144.hg.1	Sp2 transcription factor	SP2	2.04	9.51	8.47	0.31	0.32	T	T	0.0345	0.3018	Multiple_Complex
TC0100009788.hg.1	B-cell CLL/lymphoma 9	BCL9	2.04	13.64	12.6	0.31	0.29	T	T	0.0124	0.1664	Multiple_Complex
TC2200007909.hg.1	microtubule associated monooxygenase, calponin and LIM domain containing 3	MICAL3	2.04	8.16	7.13	0.55	0.13	T	T	0.0021	0.049	Multiple_Complex
TC0900008694.hg.1	crumbs family member 2	CRB2	2.04	4.94	3.91	0.28	0.13	T	F	0.0137	0.1761	Multiple_Complex
TC0300009665.hg.1	long intergenic non-protein coding RNA 888	LINC00888	2.04	8.41	7.37	0.23	0.69	T	T	0.0076	0.1213	Multiple_Complex
TC0700013390.hg.1	tripartite motif containing 73	TRIM73	2.04	4.79	3.76	0.09	0.29	T	F	0.0047	0.0877	Multiple_Complex
TC1700011917.hg.1	ubiquitin specific peptidase 36	USP36	2.04	11.41	10.38	0.24	0.34	T	T	0.004	0.0784	Multiple_Complex
TC0500011766.hg.1		CTD-2287O16.1	2.04	16.48	15.45	0.24	0.17	T	T	0.0006	0.0195	Multiple_Complex
TC0200012072.hg.1	MpV17 mitochondrial inner membrane protein	MPV17	2.04	15.92	14.89	0.29	0.42	T	T	0.0061	0.1044	Multiple_Complex
TC0X00009773.hg.1	PHD finger protein 8	PHF8	2.04	9.54	8.52	0.59	0.68	T	T	0.0018	0.0438	Multiple_Complex
TC0100018263.hg.1	glutathione S-transferase mu 1	GSTM1	2.04	10.56	9.53	0.37	0.42	T	T	0.0071	0.1154	Multiple_Complex
TC0100018497.hg.1	SHC (Src homology 2 domain containing) transforming protein 1	SHC1	2.04	14.07	13.04	0.48	0.44	T	T	0.0077	0.1218	Multiple_Complex
TC1600009202.hg.1	CREB binding protein	CREBBP	2.04	14.29	13.27	0.24	0.35	T	T	0.0219	0.2334	Multiple_Complex
TC0700006836.hg.1	Homo sapiens ribosomal protein L21, mRNA (cDNA clone MGC:2150 IMAGE:3543702), complete cds.; Homo sapiens ribosomal protein L21, mRNA (cDNA clone MGC:4136 IMAGE:2964441), complete cds.; Homo sapiens ribosomal protein L21, mRNA (cDNA clone MGC:71252 IMAGE:6084268), complete cds.; Homo sapiens ribosomal protein L21, mRNA (cDNA clone MGC:88165 IMAGE:4281405), complete cds.; Homo sapiens ribosomal pr…	RPL21	2.04	16.29	15.26	0.1	0.12	T	T	2.4e-05	0.0015	Multiple_Complex
TC1500009283.hg.1	Src homology 2 domain containing F	SHF	2.04	7.53	6.5	0.42	0.53	T	T	0.0073	0.1174	Multiple_Complex
TC0200016703.hg.1	charged multivesicular body protein 3	CHMP3	2.04	11.8	10.78	0.87	0.39	T	T	0.0007	0.0207	Multiple_Complex
TC0900011169.hg.1		RP11-151F5.2	2.04	7.09	6.07	0.12	0.26	T	T	0.0005	0.0167	Multiple_Complex
TC0300012918.hg.1	cyclin L1	CCNL1	2.04	13.64	12.61	0.07	0.36	T	T	0.0317	0.2879	Multiple_Complex
TC0100015885.hg.1	GATA zinc finger domain containing 2B	GATAD2B	2.03	12.84	11.81	0.49	0.12	T	T	0.0013	0.0351	Multiple_Complex
TC1500006683.hg.1	amyloid beta (A4) precursor protein-binding, family A, member 2	APBA2	2.03	8.4	7.37	0.53	0.37	T	T	0.0004	0.0129	Multiple_Complex
TC2200008475.hg.1	phosphoinositide-3-kinase interacting protein 1	PIK3IP1	2.03	5.4	4.37	0.97	0.43	T	T	0.0316	0.2875	Multiple_Complex
TC0X00008534.hg.1	vestigial-like family member 1	VGLL1	2.03	4.73	3.71	1.25	0.31	T	F	0.0072	0.1167	Multiple_Complex
TC1200010971.hg.1	dynactin 2 (p50)	DCTN2	2.03	14.85	13.83	0.47	0.37	T	T	0.0126	0.1673	Multiple_Complex
TC0400012940.hg.1	SEC31 homolog A, COPII coat complex component	SEC31A	2.03	15.32	14.3	0.28	0.41	T	T	0.0001	0.0062	Multiple_Complex
TC0300010338.hg.1		AC027124.3	2.03	5.06	4.04	0.54	0.4	T	T	0.0022	0.0511	Multiple_Complex
TC0900010950.hg.1	xeroderma pigmentosum, complementation group A	XPA	2.03	7.17	6.15	0.03	0.99	T	T	0.0209	0.2275	Multiple_Complex
TC1200011791.hg.1	cytoskeleton-associated protein 4	CKAP4	2.03	11.74	10.72	0.41	0.61	T	T	0.0024	0.055	Multiple_Complex
TC0200011441.hg.1	ribosomal protein L23a pseudogene 88 [Source:HGNC Symbol;Acc:HGNC:51579]	RPL23AP88	2.03	10.83	9.81	0.25	0.53	T	T	0.0393	0.3227	Multiple_Complex
TC0500012842.hg.1	dual specificity phosphatase 1	DUSP1	2.03	6.81	5.79	0.8	0.57	T	T	0.0384	0.3196	Multiple_Complex
TC0900011236.hg.1	INTS3 and NABP interacting protein	INIP	2.03	10.17	9.15	0.12	0.12	T	T	0.0003	0.0099	Multiple_Complex
TC1900009583.hg.1	zinc finger protein 266	ZNF266	2.03	10.58	9.56	0.09	0.88	T	T	0.0015	0.0384	Multiple_Complex
TC1000010471.hg.1		RP11-733D4.2	2.03	7.58	6.56	0.57	0.78	T	T	0.0124	0.1664	Multiple_Complex
TC0800009988.hg.1	integrator complex subunit 9	INTS9	2.03	10.26	9.24	0.69	0.44	T	T	0.0219	0.2335	Multiple_Complex
TC0800007351.hg.1	transforming, acidic coiled-coil containing protein 1	TACC1	2.02	8.22	7.2	0.35	0.07	T	T	0.0043	0.0818	Multiple_Complex
TC1700006733.hg.1	elongator acetyltransferase complex subunit 5	ELP5	2.02	11.84	10.83	0.22	0.66	T	T	0.0074	0.1193	Multiple_Complex
TC0200011688.hg.1	ADAM metallopeptidase domain 17	ADAM17	2.02	12.13	11.11	0.46	0.64	T	T	0.0009	0.0272	Multiple_Complex
TC0100016129.hg.1	coatomer protein complex subunit alpha	COPA	2.02	13.78	12.77	0.7	0.27	T	T	0.0025	0.0564	Multiple_Complex
TC0100008023.hg.1	peptidylprolyl isomerase H (cyclophilin H)	PPIH	2.02	10.94	9.93	0.22	0.28	T	T	0.0044	0.0829	Multiple_Complex
TC1600007753.hg.1	lon peptidase 2, peroxisomal	LONP2	2.02	12.45	11.44	0.18	0.11	T	T	2.92e-05	0.0017	Multiple_Complex
TC1400006896.hg.1	ribosomal protein L9 pseudogene 3	RPL9P3	2.02	9.41	8.4	0.27	0.61	T	T	0.0009	0.0255	Multiple_Complex
TC1400009697.hg.1	Niemann-Pick disease, type C2; microRNA 4709	NPC2; MIR4709	2.02	13.79	12.77	0.5	0.39	T	T	0.006	0.1036	Multiple_Complex
TC0100010197.hg.1	platelet endothelial aggregation receptor 1	PEAR1	2.02	5.6	4.59	0.39	0.45	T	T	0.0055	0.0967	Multiple_Complex
TC0X00009737.hg.1	family with sequence similarity 156, member A	FAM156A	2.02	9.17	8.16	0.29	0.34	T	T	0.0066	0.1098	Multiple_Complex
TC0300012391.hg.1	small nucleolar RNA, H/ACA box 7B; ribosomal protein L32 pseudogene 3	SNORA7B; RPL32P3	2.02	11.58	10.57	0.11	0.29	T	T	0.0035	0.0717	Multiple_Complex
TC0300009865.hg.1	osteocrin	OSTN	2.02	4.31	3.29	0.32	0.24	F	F	0.0118	0.1606	Coding
TC2100007935.hg.1	SR-related CTD-associated factor 4	SCAF4	2.02	15.72	14.71	0.13	0.06	T	T	0.0004	0.0148	Multiple_Complex
TC2200008068.hg.1	tubulin, alpha 3f, pseudogene	TUBA3FP	2.02	5.99	4.98	0.94	0.29	T	T	0.0477	0.3569	Multiple_Complex
TC0900007167.hg.1	DDB1 and CUL4 associated factor 10	DCAF10	2.02	10.61	9.6	0.12	0.36	T	T	0.0004	0.0128	Multiple_Complex
TC0100012816.hg.1	calsyntenin 1	CLSTN1	2.02	12.95	11.94	0.48	0.06	T	T	0.0037	0.0742	Multiple_Complex
TC1700012416.hg.1	RAB5C, member RAS oncogene family	RAB5C	2.02	13.74	12.73	0.3	0.11	T	T	0.0006	0.0197	Multiple_Complex
TC0700010170.hg.1	ring finger protein 216	RNF216	2.02	11.17	10.16	0.34	0.39	T	T	0.0008	0.023	Multiple_Complex
TC1600006492.hg.1	meteorin, glial cell differentiation regulator	METRN	2.02	6.02	5	0.43	0.3	T	T	0.0013	0.0349	Multiple_Complex
TC0800012285.hg.1	homeobox containing 1	HMBOX1	2.02	11.36	10.35	0.3	0.41	T	T	0.0001	0.0058	Multiple_Complex
TC2000006642.hg.1	bone morphogenetic protein 2	BMP2	2.02	7.23	6.22	2.58	0.16	T	T	0.0304	0.2816	Coding
TC2000007854.hg.1		RP3-481F12.1	2.02	9.62	8.61	0.07	0.44	T	T	0.0035	0.0709	Multiple_Complex
TC0100012395.hg.1	ribosomal protein L23a pseudogene 24 [Source:HGNC Symbol;Acc:HGNC:36176]	RPL23AP24	2.01	10.22	9.21	0.3	0.53	T	T	0.0059	0.102	Multiple_Complex
TC1200009843.hg.1	mannose-6-phosphate receptor (cation dependent)	M6PR	2.01	14.23	13.22	0.22	0.62	T	T	7.67e-06	0.0006	Multiple_Complex
TC0400010519.hg.1	amyloid beta (A4) precursor protein-binding, family B, member 2	APBB2	2.01	14.06	13.05	0.43	0.42	T	T	0.0083	0.1281	Multiple_Complex
TC1200009972.hg.1	G protein-coupled receptor 19	GPR19	2.01	11.69	10.68	0.39	0.44	T	T	0.0005	0.0175	Multiple_Complex
TC0X00007950.hg.1	armadillo repeat containing, X-linked 7, pseudogene [Source:HGNC Symbol;Acc:HGNC:49917]	ARMCX7P	2.01	10.27	9.26	0.46	0.37	T	T	0.0001	0.0061	Multiple_Complex
TC0100016548.hg.1	ABL proto-oncogene 2, non-receptor tyrosine kinase	ABL2	2.01	10.54	9.53	0.08	0.3	T	T	0.0078	0.1232	Multiple_Complex
TC0100015337.hg.1	adaptor-related protein complex 4, beta 1 subunit	AP4B1	2.01	8.07	7.06	0.19	0.74	T	T	0.0002	0.0096	Multiple_Complex
TC2000008824.hg.1	forkhead box S1	FOXS1	2.01	5.15	4.14	0.54	0.33	T	T	0.0005	0.0177	Multiple_Complex
TC0900010920.hg.1	AhpC/TSA antioxidant enzyme domain containing 1	AAED1	2.01	10.46	9.45	0.48	0.35	T	T	0.0084	0.1291	Multiple_Complex
TC1100007122.hg.1		RP11-159H22.1	2.01	15.23	14.23	0.17	0.34	T	T	0.0002	0.0096	Multiple_Complex
TC1900008164.hg.1	ribosomal protein S19	RPS19	2.01	17.34	16.34	0.11	0.39	T	T	0.0017	0.0429	Multiple_Complex
TC1100008120.hg.1	lysine (K)-specific demethylase 2A	KDM2A	2.01	11.9	10.9	0.37	0.43	T	T	0.002	0.0478	Multiple_Complex
TC0X00007573.hg.1	O-linked N-acetylglucosamine (GlcNAc) transferase	OGT	2.01	13.44	12.43	0.39	0.29	T	T	0.0012	0.0335	Multiple_Complex
TC1700009042.hg.1	arylformamidase	AFMID	2.01	9.64	8.63	0.19	0.79	T	T	0.0075	0.12	Multiple_Complex
TC1900006576.hg.1	DOT1-like histone H3K79 methyltransferase	DOT1L	2	10.09	9.09	0.26	0.37	T	T	0.0026	0.0575	Multiple_Complex
TC1700008923.hg.1	unkempt family zinc finger	UNK	2	9.44	8.44	0.15	0.46	T	T	0.009	0.1356	Multiple_Complex
TC0100018166.hg.1	chloride channel, voltage-sensitive 6	CLCN6	2	11.12	10.12	0.89	0.77	T	T	0.006	0.1032	Multiple_Complex
TC0100012382.hg.1	WAS protein family homolog 7 pseudogene; microRNA 6859-1	WASH7P; MIR6859-1	2	9.84	8.84	0.2	0.43	T	T	0.0178	0.2067	Multiple_Complex

## Sheet: GO TERMS ANC
GO: Molecular Function [Display Chart] 1856 annotations before applied cutoff / 18661 genes in category
	ID	Name	Source	pValue	FDR B&H	FDR B&Y	Bonferroni	Genes from Input	Genes in Annotation
1	GO:0019899	enzyme binding		7.549e-10	1.339e-06	1.085e-05	1.401e-06	209	1929
2	GO:0005509	calcium ion binding		1.443e-09	1.339e-06	1.085e-05	2.679e-06	96	708
3	GO:0008134	transcription factor binding		9.902e-08	6.126e-05	0.0004964	0.0001838	78	584
4	GO:0098772	molecular function regulator		1.586e-07	7.358e-05	0.0005963	0.0002943	155	1430
5	GO:0008013	beta-catenin binding		1.076e-06	0.0003994	0.003237	0.001997	21	89
6	GO:0019904	protein domain specific binding		1.356e-06	0.0004193	0.003398	0.002516	88	729
7	GO:0060589	nucleoside-triphosphatase regulator activity		4.024e-06	0.0009267	0.00751	0.007468	49	344
8	GO:0044212	transcription regulatory region DNA binding		4.414e-06	0.0009267	0.00751	0.008192	98	860
9	GO:0000981	RNA polymerase II transcription factor activity, sequence-specific DNA binding		4.494e-06	0.0009267	0.00751	0.00834	81	675
10	GO:0000975	regulatory region DNA binding		5.12e-06	0.0009503	0.007701	0.009503	98	863
GO: Biological Process [Display Chart] 7830 annotations before applied cutoff / 18623 genes in category
	ID	Name	Source	pValue	FDR B&H	FDR B&Y	Bonferroni	Genes from Input	Genes in Annotation
1	GO:0007417	central nervous system development		1.261e-20	5.18e-17	4.943e-16	9.876e-17	157	1002
2	GO:0016477	cell migration		1.323e-20	5.18e-17	4.943e-16	1.036e-16	188	1300
3	GO:0048870	cell motility		6.31e-20	1.235e-16	1.179e-15	4.941e-16	199	1428
4	GO:0051674	localization of cell		6.31e-20	1.235e-16	1.179e-15	4.941e-16	199	1428
5	GO:0022008	neurogenesis		1.037e-18	1.624e-15	1.55e-14	8.122e-15	215	1628
6	GO:0040011	locomotion		1.255e-18	1.637e-15	1.562e-14	9.823e-15	225	1735
7	GO:0048699	generation of neurons		2.825e-18	3.16e-15	3.015e-14	2.212e-14	204	1528
8	GO:0030182	neuron differentiation		7.653e-17	7.49e-14	7.148e-13	5.992e-13	187	1398
9	GO:2000145	regulation of cell motility		9.409e-17	8.186e-14	7.812e-13	7.367e-13	125	793
10	GO:0051270	regulation of cellular component movement		1.106e-16	8.659e-14	8.263e-13	8.659e-13	132	860
Pathway [Display Chart] 2365 annotations before applied cutoff / 12450 genes in category
	ID	Name	Source	pValue	FDR B&H	FDR B&Y	Bonferroni	Genes from Input	Genes in Annotation
1	P00012	Cadherin signaling pathway	PantherDB	8.439e-16	1.996e-12	1.666e-11	1.996e-12	45	159
2	P00057	Wnt signaling pathway	PantherDB	8.819e-14	1.043e-10	8.703e-10	2.086e-10	62	305
3	1270244	Extracellular matrix organization	BioSystems: REACTOME	2.321e-08	1.534e-05	0.000128	5.488e-05	50	298
4	1270303	Axon guidance	BioSystems: REACTOME	2.594e-08	1.534e-05	0.000128	6.135e-05	77	554
5	P00005	Angiogenesis	PantherDB	1.022e-07	4.795e-05	0.0004002	0.0002417	31	150
6	83065	Axon guidance	BioSystems: KEGG	1.217e-07	4.795e-05	0.0004002	0.0002877	34	175
7	83105	Pathways in cancer	BioSystems: KEGG	5.227e-07	0.0001766	0.001474	0.001236	57	395
8	1269443	Signalling by NGF	BioSystems: REACTOME	1.061e-06	0.0003136	0.002617	0.002509	65	483
9	137930	Signaling events mediated by Hepatocyte Growth Factor Receptor (c-Met)	BioSystems: Pathway Interaction Database	2.896e-06	0.0007012	0.005853	0.006848	18	72
10	M3721	JNK MAPK Pathway	MSigDB C2 BIOCARTA (v6.0)	2.965e-06	0.0007012	0.005853	0.007012	13	4

## Sheet: ANC UNIQUE VS ES
FRMD3
COL9A1
RPS6KA5
PCDH10
MIR4521
AHDC1
GAL3ST1
FEZ1
GABRG3
OVGP1
CMKLR1
SNORD123; SNHG18
RRP7BP
ITPRIPL1
SNORD8
MICAL1
FUT8
TPP1
C17orf96
LOC643339; RP11-511B23.2; RP11-486A14.2
PADI2
VPS9D1-AS1
GRM2
TBL1X
ZNF280A
TCF7L2
SCARB2
AL158839.1
IFNNP1
AF277315.19
CSRNP2
UGT2B7
FAM13C
DLX1
PCDHB16
RASL12
FAM171A1
RPL30P7
ZCCHC17
PTGIS
TMEM91
TRPS1
PRR5L
AC069257.6
RP4-796I17.5
ATP1A4
IGIP
ZNF652
RLBP1
GALC
ZNF641
MIR1302-1
FIRRE
POLR1C
LOC653513
SAMD14
KCNJ5
KANK1
MSTO1; MSTO2P
NPAS2
HAS2-AS1
LALBA
SEPT7P1
ZNF362
SLC18B1
RPL13AP20
AC004699.1
TMED3
RP11-1036F1.1
KAZN
SNORA9; SNHG15
RP11-536C10.15
TNNI3K
PCOLCE2
CTD-2312P21.1
MIR2355
LMNA
PLOD1
NSUN4
SLC25A6
MMP28
ANKRD66
SLC16A7
PPP1R1A
DCAF16
MEX3A
TRAF6
SLC1A6
QARS; MIR6890
DOC2B
RPL3P4
RGL2
SMIM24
SSC4D
GTF2H4
FAM129B
SSR2
LIPE-AS1
SPATA31A1
CDC14A
SLC35E1
LIG3
UXS1
RNF43
SPATA31A6
GPSM3
SLC8A2
ATRN
RP11-109L13.1
CCDC136
SCAMP3
TMEM53
EPB41
VANGL2
SNORA5C
TCEB1P10
GSTM5
LOC645166; RP11-14N7.2
DNAH2
RPL35AP21
TM9SF4
TSPAN31
LRP5
DRG2
C14orf37
HGF
PRDX2P2
CNTNAP1
POMGNT1
PTDSS1
TMEM106A
CSPG4P13
ATXN1L
SRRD
PMM1
TRAF5
AC243562.1
UGT2B25P
DUSP7
TBC1D3
GSDMB
RP4-717I23.2
LIPH
CTD-2085J24.5
BCL9
USP36
GSTM1
SHC1
PIK3IP1
VGLL1
CKAP4
RP11-733D4.2
TACC1
ELP5
COPA
PPIH
NPC2; MIR4709
SNORA7B; RPL32P3
SCAF4
CLSTN1
RNF216
APBB2
FOXS1
AAED1
RPS19
KDM2A
AFMID
WASH7P; MIR6859-1

## Sheet: +RA VS ES >2FOLD
#%result_name=Analysis_1
#%array_type=Clariom_D_Human
#%annotation=Clariom_D_Human.na36.hg38.transcript.csv
#%comparison=VD6 vs PLURI
ID	Description	Gene Symbol	Fold Change	VD6 Avg (log2)	PLURI Avg (log2)	VD6 Standard Deviation	PLURI Standard Deviation	VD6 Expressed	PLURI Expressed	P-val	FDR P-val	Group	Expressed in both conditios
TC0300006856.hg.1	retinoic acid receptor, beta	RARB	2252.93	15.19	4.05	0.79	0.4	T	F	1.02e-14	2.44e-11	Multiple_Complex
TC1200008346.hg.1	ALX homeobox 1	ALX1	2055.08	16	4.99	0.97	0.59	T	T	6.13e-16	6.03e-12	Coding
TC2000008445.hg.1	fibronectin leucine rich transmembrane protein 3	FLRT3	1093.66	15.59	5.5	0.93	0.95	T	T	1.24e-12	9.97e-10	Multiple_Complex
TC1700008511.hg.1	T-box 2	TBX2	817.52	14.25	4.57	0.58	0.56	T	T	3.14e-11	1.51e-08	Multiple_Complex
TC1200012016.hg.1	T-box 3	TBX3	813.37	13.58	3.92	0.61	0.37	T	F	1.34e-11	7.37e-09	Multiple_Complex
TC0400012796.hg.1	platelet-derived growth factor receptor, alpha polypeptide	PDGFRA	634.2	15.83	6.52	1.08	0.44	T	T	2.2e-10	7.74e-08	Multiple_Complex
TC1100013131.hg.1	insulin-like growth factor 2	IGF2	415.96	14.27	5.57	0.79	0.13	T	T	8.64e-11	3.59e-08	Multiple_Complex
TC0500007044.hg.1	cadherin 6, type 2, K-cadherin (fetal kidney)	CDH6	358.41	15.06	6.57	0.23	1.3	T	T	3.68e-08	5.78e-06	Multiple_Complex
TC0X00008785.hg.1	biglycan	BGN	326.44	15.98	7.63	0.4	0.25	T	T	3.77e-11	1.76e-08	Multiple_Complex
TC0800010382.hg.1	snail family zinc finger 2	SNAI2	305.47	15.62	7.36	0.46	0.94	T	T	2.78e-09	6.53e-07	Coding
TC1500008442.hg.1	nuclear receptor subfamily 2, group F, member 2	NR2F2	257.26	12.34	4.33	1.05	0.31	T	F	2.73e-08	4.48e-06	Multiple_Complex
TC0100014531.hg.1	wntless Wnt ligand secretion mediator	WLS	246.61	13.62	5.68	0.57	0.6	T	T	7.47e-15	2.16e-11	Multiple_Complex
TC1500009036.hg.1	Meis homeobox 2	MEIS2	233.4	13.44	5.57	0.68	0.4	T	T	1.51e-07	1.89e-05	Multiple_Complex
TC2000007670.hg.1	snail family zinc finger 1	SNAI1	201.8	14.68	7.03	0.8	0.33	T	T	1.74e-09	4.48e-07	Coding
TC0200015350.hg.1	raftlin family member 2	RFTN2	200.59	14.39	6.74	0.89	0.38	T	T	6.74e-09	1.37e-06	Multiple_Complex
TC0900009905.hg.1	ciliary neurotrophic factor receptor	CNTFR	184.77	13.08	5.55	0.82	0.39	T	T	2.67e-13	2.99e-10	Multiple_Complex
TC0700008928.hg.1	cadherin-like and PC-esterase domain containing 1	CPED1	170.7	11.93	4.51	2.14	0.42	T	T	1.55e-08	2.79e-06	Multiple_Complex
TC1000007199.hg.1	zinc finger E-box binding homeobox 1	ZEB1	168.23	13.39	6	1.24	0.89	T	T	4.23e-09	9.23e-07	Multiple_Complex
TC0700010556.hg.1	homeobox A1	HOXA1	164.17	11.49	4.13	0.18	0.12	T	F	4.28e-17	6.45e-13	Multiple_Complex
TC0500008086.hg.1	nuclear receptor subfamily 2, group F, member 1	NR2F1	150.39	13.38	6.14	0.84	0.47	T	T	1.06e-07	1.41e-05	Multiple_Complex
TC1500009505.hg.1	protogenin	PRTG	146.64	16.05	8.86	0.26	1.07	T	T	1.81e-12	1.37e-09	Multiple_Complex
TC0100016018.hg.1	cellular retinoic acid binding protein 2	CRABP2	143.92	18.23	11.06	0.21	0.72	T	T	1.68e-13	2.11e-10	Coding
TC1400009175.hg.1	nidogen 2 (osteonidogen)	NID2	139.93	14.24	7.12	0.22	0.16	T	T	4.84e-12	3.04e-09	Multiple_Complex
TC1000011400.hg.1	ankyrin repeat domain 1 (cardiac muscle)	ANKRD1	139.31	10.56	3.44	2.49	0.17	T	F	3.06e-07	3.4e-05	Multiple_Complex
TC0200015136.hg.1	frizzled-related protein	FRZB	139.27	16.95	9.83	0.57	0.68	T	T	3.1e-07	3.44e-05	Coding
TC0800011646.hg.1	hyaluronan synthase 2	HAS2	137.32	14.3	7.2	1.35	0.64	T	T	2.91e-09	6.78e-07	Multiple_Complex
TC0400011548.hg.1	lymphoid enhancer-binding factor 1	LEF1	135.32	13.05	5.97	0.42	0.44	T	T	1.6e-11	8.49e-09	Multiple_Complex
TC0200006891.hg.1	ras homolog family member B	RHOB	121.85	13.75	6.82	0.67	1.12	T	T	2.58e-11	1.27e-08	Coding
TC0500011448.hg.1	arrestin domain containing 3	ARRDC3	121.29	15.32	8.4	1.05	1.66	T	T	8.43e-09	1.67e-06	Multiple_Complex
TC1200010130.hg.1	SRY box 5	SOX5	115.48	12.04	5.19	0.4	0.8	T	T	2.22e-10	7.77e-08	Multiple_Complex
TC0600014220.hg.1	serpin peptidase inhibitor, clade B (ovalbumin), member 9	SERPINB9	107.08	17.21	10.47	0.6	1.16	T	T	4.43e-08	6.79e-06	Multiple_Complex
TC0900007457.hg.1	contactin associated protein-like 3 pseudogene 2; contactin associated protein-like 3	CNTNAP3P2; CNTNAP3	99.64	12.34	5.7	0.92	1.11	T	T	1.66e-06	0.0001	Multiple_Complex
TC0100013632.hg.1	fibronectin type III domain containing 5	FNDC5	98.95	13.52	6.89	0.67	0.37	T	T	1.61e-13	2.07e-10	Multiple_Complex
TC0100015234.hg.1	solute carrier family 16, member 4	SLC16A4	98.9	12.57	5.94	1.59	0.34	T	T	8.11e-11	3.41e-08	Multiple_Complex
TC0500011418.hg.1	myocyte enhancer factor 2C	MEF2C	98.78	14.18	7.56	0.16	0.69	T	T	2.13e-09	5.23e-07	Multiple_Complex
TC1100009101.hg.1	zinc finger and BTB domain containing 16	ZBTB16	98.16	11.83	5.21	0.05	0.36	T	T	1.2e-12	9.84e-10	Multiple_Complex
TC0200015831.hg.1	paired box 3	PAX3	96.78	12	5.41	0.76	0.25	T	T	4.9e-13	4.93e-10	Multiple_Complex
TC0300012073.hg.1	limbic system-associated membrane protein	LSAMP	96.36	13.74	7.15	0.26	0.13	T	T	5.52e-11	2.44e-08	Multiple_Complex
TC0600011524.hg.1	collagen, type XI, alpha 2	COL11A2	94.97	10.94	4.37	1.06	0.18	T	T	4.19e-06	0.0003	Multiple_Complex
TC1000008478.hg.1	cytochrome P450, family 26, subfamily A, polypeptide 1	CYP26A1	94.33	12.27	5.71	0.3	0.64	T	T	6.78e-08	9.61e-06	Multiple_Complex
TC1300007774.hg.1	muscleblind-like splicing regulator 2	MBNL2	91.16	11.44	4.93	0.74	0.4	T	T	8.38e-09	1.66e-06	Multiple_Complex
TC0200010545.hg.1	neuropilin 2	NRP2	89.35	15.81	9.33	0.38	0.97	T	T	3.1e-13	3.34e-10	Multiple_Complex
TC0500008736.hg.1	transforming growth factor, beta-induced, 68kDa	TGFBI	89.2	15.11	8.63	0.69	0.17	T	T	3.98e-07	4.17e-05	Multiple_Complex
TC1100006911.hg.1	spondin 1, extracellular matrix protein	SPON1	86.49	11.29	4.86	1.03	1.1	T	T	2.91e-08	4.74e-06	Multiple_Complex
TC0200014512.hg.1	zinc finger E-box binding homeobox 2	ZEB2	76.33	10.38	4.12	0.31	0.61	T	F	2.6e-08	4.29e-06	Multiple_Complex
TC0500011146.hg.1	ectodermal-neural cortex 1 (with BTB domain)	ENC1	74.55	13.88	7.66	0.44	0.86	T	T	5.27e-08	7.76e-06	Multiple_Complex
TC0900010773.hg.1	receptor tyrosine kinase-like orphan receptor 2	ROR2	72.74	11.05	4.87	0.86	0.24	T	T	3.83e-11	1.78e-08	Multiple_Complex
TC1100012019.hg.1	sestrin 3	SESN3	71.74	15.04	8.88	0.3	0.89	T	T	6.09e-10	1.84e-07	Multiple_Complex
TC1900010651.hg.1	glia maturation factor, gamma	GMFG	68.63	10.52	4.41	0.9	0.77	T	T	1.51e-08	2.73e-06	Multiple_Complex
TC0300011247.hg.1	wingless-type MMTV integration site family, member 5A	WNT5A	67.74	12.16	6.08	0.19	0.6	T	T	6.11e-10	1.84e-07	Multiple_Complex
TC1100012469.hg.1	sodium channel, voltage gated, type IV beta subunit	SCN4B	64.56	11.29	5.28	0.13	0.13	T	T	2.57e-11	1.27e-08	Multiple_Complex
TC1100010207.hg.1	SRY box 6; microRNA 6073	SOX6; MIR6073	64.45	10.74	4.73	0.48	0.48	T	T	5.57e-11	2.46e-08	Multiple_Complex
TC1900010466.hg.1	leucine-rich repeat LGI family, member 4	LGI4	64.04	11.71	5.71	0.84	0.07	T	T	2.65e-10	8.99e-08	Multiple_Complex
TC1100013130.hg.1	insulin-like growth factor 2; INS-IGF2 readthrough	IGF2; INS-IGF2	62.45	11.06	5.09	1.06	0.38	T	T	1.92e-11	1e-08	Multiple_Complex
TC0100013534.hg.1	lysosomal protein transmembrane 5	LAPTM5	60.88	10.32	4.39	0.33	0.25	T	F	6.25e-15	1.88e-11	Multiple_Complex
TC1100009982.hg.1	dachsous cadherin-related 1	DCHS1	59.1	11.5	5.61	0.23	0.81	T	T	7.4e-10	2.18e-07	Multiple_Complex
TC0100009364.hg.1	colony stimulating factor 1 (macrophage)	CSF1	58.95	13.11	7.23	0.66	0.41	T	T	1.59e-08	2.83e-06	Multiple_Complex
TC0300007051.hg.1	integrin alpha 9	ITGA9	57.97	12.26	6.4	0.42	0.46	T	T	7.36e-11	3.14e-08	Multiple_Complex
TC0200015893.hg.1	dedicator of cytokinesis 10	DOCK10	57.41	11.57	5.73	1.34	0.43	T	T	7.47e-06	0.0004	Multiple_Complex
TC1700012191.hg.1	CD68 molecule	CD68	56.75	10.24	4.41	0.32	0.31	T	T	1.34e-09	3.55e-07	Coding
TC0400007169.hg.1	protocadherin 7	PCDH7	53.63	11.19	5.45	0.83	1.09	T	T	1.42e-09	3.75e-07	Multiple_Complex
TC0600010777.hg.1	transcription factor AP-2 alpha (activating enhancer binding protein 2 alpha)	TFAP2A	51.66	11.85	6.16	0.41	0.03	T	T	6.65e-13	6.1e-10	Multiple_Complex
TC0800012387.hg.1	DLC1 Rho GTPase activating protein	DLC1	51.41	9.53	3.84	0.17	0.62	T	F	1.55e-11	8.34e-09	Multiple_Complex
TC1300008892.hg.1	lysophosphatidic acid receptor 6	LPAR6	50.64	11.72	6.05	0.95	0.74	T	T	1.13e-08	2.12e-06	Multiple_Complex
TC0900007576.hg.1	annexin A1	ANXA1	50.57	10.7	5.04	1.96	0.73	T	T	6.61e-06	0.0004	Multiple_Complex
TC1200010795.hg.1	retinoic acid receptor, gamma	RARG	48.38	15.91	10.31	0.06	0.41	T	T	4.71e-10	1.46e-07	Multiple_Complex
TC1100006932.hg.1	inscuteable homolog (Drosophila)	INSC	47.55	9	3.43	1.31	0.27	T	F	2.44e-10	8.46e-08	Multiple_Complex
TC0400008943.hg.1	endothelin receptor type A	EDNRA	47.17	14.87	9.31	0.61	0.94	T	T	6.47e-08	9.23e-06	Multiple_Complex
TC0300011651.hg.1	glucan (1,4-alpha-), branching enzyme 1	GBE1	45.89	12.78	7.26	1.96	1.95	T	T	4.7e-05	0.002	Multiple_Complex
TC1700008794.hg.1	SRY box 9	SOX9	45.62	12.76	7.25	0.69	0.69	T	T	4.53e-09	9.79e-07	Multiple_Complex
TC0500012670.hg.1	gamma-aminobutyric acid (GABA) A receptor, beta 2	GABRB2	43.69	10.78	5.33	0.51	0.34	T	T	1.42e-10	5.36e-08	Multiple_Complex
TC0500013301.hg.1	Dab, mitogen-responsive phosphoprotein, homolog 2 (Drosophila)	DAB2	43.09	12.92	7.49	0.74	1.01	T	T	1.51e-09	3.95e-07	Multiple_Complex
TC1800006827.hg.1	growth regulation by estrogen in breast cancer-like	GREB1L	42.95	9.72	4.29	0.45	0.45	T	T	3.13e-10	1.03e-07	Multiple_Complex
TC0100010244.hg.1	interferon, gamma-inducible protein 16	IFI16	41.08	11.35	5.99	0.76	1.38	T	T	7.42e-06	0.0004	Multiple_Complex
TC0100017844.hg.1	nidogen 1	NID1	41.07	17.04	11.68	0.37	0.34	T	T	5.06e-09	1.07e-06	Multiple_Complex
TC0200009189.hg.1	glycophorin C (Gerbich blood group)	GYPC	39.81	13.28	7.97	0.41	0.72	T	T	1.44e-11	7.78e-09	Multiple_Complex
TC0X00008394.hg.1	BCL6 corepressor-like 1	BCORL1	39.48	13.05	7.74	0.5	0.44	T	T	2.04e-11	1.05e-08	Multiple_Complex
TC1400007154.hg.1	guanine nucleotide binding protein (G protein), gamma 2	GNG2	39.08	15.23	9.94	0.11	0.29	T	T	1.13e-09	3.1e-07	Multiple_Complex
TC1100009279.hg.1	out at first homolog	OAF	38.6	11.3	6.03	1.34	0.25	T	T	3.65e-10	1.17e-07	Coding
TC2100008477.hg.1	S100 calcium binding protein B	S100B	38.41	9.42	4.16	1.41	0.22	T	T	8.96e-09	1.75e-06	Coding
TC1500010006.hg.1	stimulated by retinoic acid 6	STRA6	38.39	10.31	5.05	0.54	0.27	T	T	1.78e-09	4.55e-07	Multiple_Complex
TC1400010647.hg.1	bradykinin receptor B2	BDKRB2	37.45	9.68	4.45	0.07	0.44	T	F	8.87e-15	2.24e-11	Coding
TC0200015194.hg.1	tissue factor pathway inhibitor (lipoprotein-associated coagulation inhibitor)	TFPI	36.54	13.02	7.83	1.3	1.33	T	T	0.001	0.0211	Multiple_Complex
TC0700009688.hg.1	nitric oxide synthase 3 (endothelial cell)	NOS3	35.69	9.41	4.25	0.21	0.27	T	T	7.97e-13	7.16e-10	Multiple_Complex
TC0300013471.hg.1	B-cell CLL/lymphoma 6	BCL6	34.52	14.6	9.49	0.48	0.64	T	T	3.98e-06	0.0003	Multiple_Complex
TC1400007404.hg.1	ras homolog family member J	RHOJ	34.36	9.78	4.68	0.35	0.6	T	T	2.87e-10	9.55e-08	Multiple_Complex
TC0400011978.hg.1	TBC1 domain family, member 9 (with GRAM domain)	TBC1D9	34.09	9.37	4.28	0.5	0.42	T	F	6.3e-13	5.9e-10	Multiple_Complex
TC2100008545.hg.1	nuclear receptor interacting protein 1	NRIP1	33.61	14.14	9.07	0.54	0.43	T	T	1.33e-08	2.45e-06	Multiple_Complex
TC2200007150.hg.1	TIMP metallopeptidase inhibitor 3	TIMP3	32.33	12	6.99	1.08	0.2	T	T	3.37e-11	1.61e-08	Multiple_Complex
TC1500009298.hg.1	solute carrier family 30 (zinc transporter), member 4	SLC30A4	31.35	9.88	4.91	1.02	0.49	T	F	1.57e-12	1.21e-09	Multiple_Complex
TC1300006594.hg.1	tumor necrosis factor receptor superfamily, member 19	TNFRSF19	31.18	9.52	4.56	0.58	0.56	T	F	1.52e-06	0.0001	Multiple_Complex
TC0700008358.hg.1	collagen, type I, alpha 2	COL1A2	30.87	14.27	9.32	0.94	0.68	T	T	1.54e-07	1.92e-05	Multiple_Complex
TC2100007140.hg.1	v-ets avian erythroblastosis virus E26 oncogene homolog 2	ETS2	30.43	15.41	10.48	0.61	0.25	T	T	1.07e-10	4.3e-08	Multiple_Complex
TC0500012567.hg.1	fatty acid hydroxylase domain containing 2	FAXDC2	29.13	14.6	9.73	0.89	0.45	T	T	7.79e-05	0.0029	Multiple_Complex
TC0200007348.hg.1	protein kinase domain containing, cytoplasmic	PKDCC	28.96	12.36	7.5	1.25	0.33	T	T	3.51e-08	5.59e-06	Multiple_Complex
TC0X00006715.hg.1	sex comb on midleg-like 1 (Drosophila)	SCML1	28.84	12.31	7.46	0.38	0.33	T	T	1.58e-12	1.21e-09	Multiple_Complex
TC1100012775.hg.1	v-ets avian erythroblastosis virus E26 oncogene homolog 1	ETS1	28.2	14.71	9.89	0.56	0.17	T	T	5.88e-12	3.63e-09	Multiple_Complex
TC1800007850.hg.1	collectin sub-family member 12	COLEC12	28.06	10.16	5.35	0.29	0.44	T	T	2.05e-08	3.52e-06	Multiple_Complex
TC1200009096.hg.1	coiled-coil domain containing 60	CCDC60	27.92	9.56	4.76	0.72	0.05	T	T	1.35e-10	5.17e-08	Multiple_Complex
TC0700012551.hg.1		RP11-309L24.6	27.6	10.68	5.89	1.15	0.19	T	T	3.47e-07	3.75e-05	Multiple_Complex
TC1600010206.hg.1		CTB-55P19.1	27.51	8.22	3.44	1.77	0.2	T	F	9.21e-07	8.3e-05	Multiple_Complex
TC0300006905.hg.1	RNA binding motif, single stranded interacting protein 3	RBMS3	27.43	10.34	5.57	1.03	0.37	T	T	1.32e-06	0.0001	Multiple_Complex
TC0900007322.hg.1	family with sequence similarity 74, member A4	FAM74A4	26.78	9.13	4.39	0.93	0.17	T	T	1.66e-12	1.26e-09	Multiple_Complex
TC0200016471.hg.1	MAX dimerization protein 1	MXD1	25.79	10.49	5.8	1.34	0.2	T	T	7.75e-07	7.21e-05	Multiple_Complex
TC0X00007507.hg.1	ephrin-B1	EFNB1	25.78	12.21	7.53	0.91	0.57	T	T	2.59e-09	6.14e-07	Multiple_Complex
TC1100013229.hg.1	FXYD domain containing ion transport regulator 6; FXYD6-FXYD2 readthrough; FXYD domain containing ion transport regulator 2	FXYD6; FXYD6-FXYD2; FXYD2	25.74	10.82	6.13	0.29	0.37	T	T	1.62e-13	2.07e-10	Multiple_Complex
TC0800011041.hg.1	matrix metallopeptidase 16 (membrane-inserted)	MMP16	25.61	15.18	10.5	0.56	0.59	T	T	3.2e-05	0.0015	Multiple_Complex
TC0100015754.hg.1	cathepsin K	CTSK	25.55	12.4	7.72	0.22	1.23	T	T	3.66e-08	5.77e-06	Multiple_Complex
TC1700010641.hg.1	keratin 23, type I	KRT23	25.25	8.13	3.47	2.65	0.78	T	F	0.0003	0.009	Multiple_Complex
TC1700011121.hg.1	transducer of ERBB2, 1	TOB1	24.66	16.99	12.37	0.41	0.54	T	T	1.15e-11	6.6e-09	Multiple_Complex
TC1000011923.hg.1	GDNF family receptor alpha 1	GFRA1	24.54	9.76	5.14	1.05	0.35	T	T	1.12e-07	1.46e-05	Multiple_Complex
TC0800007311.hg.1	adhesion G protein-coupled receptor A2	ADGRA2	23.93	10.71	6.13	0.97	0.5	T	T	2.51e-11	1.25e-08	Multiple_Complex
TC0300013988.hg.1	poly(rC) binding protein 4	PCBP4	23.8	11.97	7.39	0.69	0.12	T	T	8.51e-12	5.03e-09	Multiple_Complex
TC0500012870.hg.1	stanniocalcin 2	STC2	23.73	14.73	10.16	0.76	0.2	T	T	3.92e-08	6.14e-06	Multiple_Complex
TC0200009470.hg.1	histamine N-methyltransferase	HNMT	23.51	12.42	7.86	1.15	0.57	T	T	1.46e-08	2.65e-06	Multiple_Complex
TC1000011726.hg.1	SH3 and PX domains 2A	SH3PXD2A	23.47	11.47	6.91	0.67	0.11	T	T	2.68e-10	9.04e-08	Multiple_Complex
TC0500010169.hg.1	ANKH inorganic pyrophosphate transport regulator	ANKH	23.22	11.67	7.13	0.7	0.4	T	T	1.35e-06	0.0001	Multiple_Complex
TC1100008018.hg.1	nuclear paraspeckle assembly transcript 1 (non-protein coding); microRNA 612	NEAT1; MIR612	23.16	11.97	7.44	1.06	0.71	T	T	5.12e-08	7.59e-06	Multiple_Complex
TC1100008525.hg.1	myosin VIIA	MYO7A	23.15	9.79	5.26	0.23	0.05	T	T	2.09e-13	2.53e-10	Multiple_Complex
TC1700009850.hg.1	peripheral myelin protein 22	PMP22	23.02	12.16	7.63	0.77	0.84	T	T	7.29e-08	1.02e-05	Multiple_Complex
TC1000011774.hg.1	sortilin-related VPS10 domain containing receptor 1	SORCS1	22.65	10.59	6.08	0.35	0.53	T	T	9.67e-10	2.71e-07	Multiple_Complex
TC0900007319.hg.1	family with sequence similarity 74, member A6	FAM74A6	22.49	7.92	3.42	0.73	0.08	T	T	1.3e-12	1.04e-09	Multiple_Complex
TC1700006772.hg.1	lysine (K)-specific demethylase 6B	KDM6B	22.42	12.2	7.71	0.67	1.41	T	T	3.11e-07	3.44e-05	Multiple_Complex
TC0800010926.hg.1	phosphoprotein membrane anchor with glycosphingolipid microdomains 1	PAG1	22.1	8.14	3.67	2.65	0.19	T	F	2.66e-05	0.0013	Multiple_Complex
TC0100012921.hg.1	dehydrogenase/reductase (SDR family) member 3; microRNA 6730	DHRS3; MIR6730	21.85	11.54	7.09	0.64	0.41	T	T	6.91e-10	2.05e-07	Multiple_Complex
TC0500011648.hg.1	ephrin-A5	EFNA5	21.7	14.89	10.45	0.12	0.14	T	T	1.14e-09	3.11e-07	Multiple_Complex
TC1100009485.hg.1	Fli-1 proto-oncogene, ETS transcription factor	FLI1	21.62	9.39	4.96	1.1	0.33	T	T	1.58e-09	4.12e-07	Multiple_Complex
TC0600008231.hg.1	transcription factor AP-2 beta (activating enhancer binding protein 2 beta)	TFAP2B	21.54	8.98	4.55	1.35	0.52	T	T	3.13e-09	7.21e-07	Multiple_Complex
TC0100015598.hg.1	thioredoxin interacting protein	TXNIP	21.39	14.04	9.63	0.94	1.2	T	T	0.0001	0.0049	Multiple_Complex
TC2000006674.hg.1	phospholipase C, beta 4	PLCB4	21.34	12.1	7.68	1.4	0.1	T	T	9.69e-06	0.0006	Multiple_Complex
TC1100007056.hg.1	neural EGFL like 1	NELL1	21.05	7.52	3.12	0.43	0.15	T	F	4.3e-13	4.46e-10	Multiple_Complex
TC1700008549.hg.1	tetratricopeptide repeat, ankyrin repeat and coiled-coil containing 2	TANC2	20.93	11.9	7.52	0.79	0.19	T	T	4.4e-09	9.55e-07	Multiple_Complex
TC0400011916.hg.1	protocadherin 18	PCDH18	20.9	16.66	12.27	0.35	0.48	T	T	1.23e-07	1.59e-05	Multiple_Complex
TC0100015223.hg.1	ALX homeobox 3	ALX3	20.87	8.16	3.78	1.07	0.26	T	F	1.37e-11	7.45e-09	Coding
TC1000009067.hg.1	G protein-coupled receptor kinase 5	GRK5	20.46	8.53	4.17	0.5	0.5	T	T	1.21e-10	4.77e-08	Multiple_Complex
TC0X00010860.hg.1	microRNA 20b	MIR20B	20.26	9.45	5.11	1.21	0.85	T	F	9.12e-06	0.0005	Multiple_Complex
TC1200011882.hg.1	transient receptor potential cation channel, subfamily V, member 4	TRPV4	20.23	10.35	6.02	0.32	0.25	T	T	1.22e-09	3.27e-07	Multiple_Complex
TC0100016366.hg.1	kinesin-associated protein 3	KIFAP3	19.5	11.69	7.4	0.8	0.64	T	T	1.26e-08	2.32e-06	Multiple_Complex
TC0100010874.hg.1	ral guanine nucleotide dissociation stimulator-like 1	RGL1	19.49	11.46	7.17	0.84	0.49	T	T	1.55e-09	4.06e-07	Multiple_Complex
TC0700013522.hg.1	twist family bHLH transcription factor 1	TWIST1	19.23	8.7	4.44	0.67	0.13	T	F	3.48e-12	2.26e-09	Multiple_Complex
TC0300011391.hg.1	ADAM metallopeptidase with thrombospondin type 1 motif 9	ADAMTS9	18.98	9.09	4.85	0.88	0.43	T	F	8.37e-08	1.16e-05	Multiple_Complex
TC0300008991.hg.1	splA/ryanodine receptor domain and SOCS box containing 4	SPSB4	18.49	12.36	8.16	0.35	0.13	T	T	3.85e-08	6.03e-06	Multiple_Complex
TC1000012169.hg.1	ADAM metallopeptidase domain 12	ADAM12	18.38	9.25	5.05	0.5	0.4	T	F	2.86e-05	0.0013	Multiple_Complex
TC1000007761.hg.1	AT rich interactive domain 5B (MRF1-like)	ARID5B	18.37	10.68	6.48	0.24	0.52	T	T	4.18e-07	4.34e-05	Multiple_Complex
TC1600008164.hg.1	family with sequence similarity 65, member A	FAM65A	18.23	13.43	9.24	0.26	0.4	T	T	3.01e-09	7e-07	Multiple_Complex
TC1200012617.hg.1	FYVE, RhoGEF and PH domain containing 4	FGD4	18.14	15.62	11.44	0.39	0.68	T	T	7.48e-09	1.51e-06	Multiple_Complex
TC1800007220.hg.1	ring finger protein 165	RNF165	18.07	10.57	6.39	0.93	0.19	T	T	8.41e-09	1.67e-06	Multiple_Complex
TC0900007387.hg.1		RP11-236F9.2	18.01	10.39	6.22	0.18	0.19	T	T	6.88e-08	9.73e-06	Multiple_Complex
TC1900008057.hg.1	ZFP36 ring finger protein	ZFP36	17.97	11.22	7.05	1.94	0.23	T	T	7.9e-07	7.33e-05	Coding
TC0500011725.hg.1	mutated in colorectal cancers	MCC	17.85	11.39	7.23	0.53	0.42	T	T	1.62e-10	5.93e-08	Multiple_Complex
TC0X00006799.hg.1	spermidine/spermine N1-acetyltransferase 1	SAT1	17.36	13.94	9.82	0.59	0.95	T	T	3.81e-05	0.0017	Multiple_Complex
TC1000010589.hg.1	V-set and transmembrane domain containing 4	VSTM4	17.34	11.02	6.9	1.11	0.34	T	T	1.59e-09	4.12e-07	Multiple_Complex
TC0300011550.hg.1	PDZ domain containing ring finger 3	PDZRN3	17.29	13.8	9.69	1.52	0.78	T	T	2.43e-07	2.81e-05	Multiple_Complex
TC1000010273.hg.1	neuropilin 1	NRP1	17.24	9.93	5.83	1.08	0.39	T	T	2.56e-07	2.92e-05	Multiple_Complex
TC0500007549.hg.1	zinc finger, SWIM-type containing 6	ZSWIM6	17.23	15.53	11.43	0.35	0.23	T	T	3.28e-10	1.07e-07	Multiple_Complex
TC0X00010857.hg.1	microRNA 363	MIR363	17.2	9.85	5.75	0.84	0.76	T	T	1.11e-07	1.46e-05	Multiple_Complex
TC1700008209.hg.1	nerve growth factor receptor	NGFR	17.19	11.17	7.07	0.79	0.41	T	T	3.89e-10	1.23e-07	Multiple_Complex
TC1900011861.hg.1	sphingosine-1-phosphate receptor 2	S1PR2	17.18	9.93	5.83	0.1	0.52	T	T	1.99e-11	1.03e-08	Multiple_Complex
TC0200016770.hg.1	microRNA 6809; tensin 1	MIR6809; TNS1	17.1	8.1	4	0.45	0.19	T	T	1.91e-12	1.43e-09	Multiple_Complex
TC0X00010859.hg.1	microRNA 19b-2	MIR19B2	16.96	12.28	8.19	0.83	1.13	T	T	2.75e-06	0.0002	Multiple_Complex
TC0600009597.hg.1	tumor necrosis factor, alpha-induced protein 3	TNFAIP3	16.94	11.69	7.61	0.7	0.21	T	T	3.32e-10	1.08e-07	Multiple_Complex
TC0700010989.hg.1	tensin 3	TNS3	16.83	13.08	9.01	0.69	0.38	T	T	5.29e-09	1.11e-06	Multiple_Complex
TC0600006554.hg.1	forkhead box C1	FOXC1	16.57	9.06	5.01	0.26	0.07	T	T	7.46e-12	4.48e-09	Multiple_Complex
TC0600007534.hg.1	proline rich 3	PRR3	16.5	11.86	7.82	0.53	0.39	T	T	3.7e-10	1.18e-07	Multiple_Complex
TC1000009851.hg.1	FERM domain containing 4A	FRMD4A	16.26	15.42	11.4	0.12	0.16	T	T	1.11e-09	3.03e-07	Multiple_Complex
TC1400010651.hg.1	delta-like 1 homolog (Drosophila)	DLK1	16.25	8.8	4.78	1.65	1.06	T	T	0.0003	0.009	Multiple_Complex
TC0200014851.hg.1	LDL receptor related protein 2	LRP2	16.18	8.88	4.86	1.84	0.52	T	T	6.64e-06	0.0004	Multiple_Complex
TC1600010732.hg.1	NAD(P)H dehydrogenase, quinone 1	NQO1	15.94	15.87	11.87	0.83	0.24	T	T	2.08e-05	0.001	Multiple_Complex
TC1200007844.hg.1	RNA binding motif, single stranded interacting protein 2	RBMS2	15.89	12.44	8.45	0.33	0.41	T	T	1.11e-10	4.43e-08	Multiple_Complex
TC0700010603.hg.1	TLR4 interactor with leucine-rich repeats	TRIL	15.78	7.53	3.55	1.17	0.69	T	T	1.23e-08	2.28e-06	Multiple_Complex
TC0900010147.hg.1	contactin associated protein-like 3B	CNTNAP3B	15.6	10.26	6.29	1.06	0.68	T	T	1.39e-05	0.0007	Multiple_Complex
TC0200008894.hg.1	MER proto-oncogene, tyrosine kinase	MERTK	15.54	14.34	10.39	0.56	0.82	T	T	3.22e-05	0.0015	Multiple_Complex
TC1200010968.hg.1	DNA-damage-inducible transcript 3	DDIT3	15.39	8.6	4.66	1.75	0.17	T	T	2.36e-05	0.0011	Coding
TC1200008683.hg.1	carbohydrate (chondroitin 4) sulfotransferase 11	CHST11	15.3	16.05	12.11	0.18	0.13	T	T	1.14e-08	2.13e-06	Multiple_Complex
TC1000011445.hg.1	myoferlin	MYOF	15.23	10.31	6.38	0.12	0.17	T	T	1.17e-05	0.0007	Multiple_Complex
TC1000009893.hg.1	integrin alpha 8	ITGA8	14.86	8.97	5.07	1.06	0.68	T	T	6.93e-05	0.0027	Multiple_Complex
TC1600008128.hg.1	CKLF-like MARVEL transmembrane domain containing 3	CMTM3	14.84	12.28	8.39	0.23	0.92	T	T	8.58e-10	2.45e-07	Multiple_Complex
TC0500010835.hg.1	polo-like kinase 2	PLK2	14.83	13.75	9.86	1.52	0.91	T	T	6.01e-06	0.0004	Multiple_Complex
TC0200006583.hg.1	ring finger protein 144A	RNF144A	14.79	11.17	7.29	0.8	0.71	T	T	2.99e-07	3.34e-05	Multiple_Complex
TC1300009147.hg.1	olfactory receptor, family 7, subfamily E, member 104 pseudogene	OR7E104P	14.71	8.44	4.56	0.25	0.73	T	F	4.81e-08	7.24e-06	Multiple_Complex
TC0800010774.hg.1	EYA transcriptional coactivator and phosphatase 1	EYA1	14.61	9.89	6.03	0.71	0.26	T	T	2.52e-06	0.0002	Multiple_Complex
TC0X00008017.hg.1	proteolipid protein 1	PLP1	14.6	18.28	14.41	0.17	0.14	T	T	1.99e-09	5e-07	Multiple_Complex
TC1200007809.hg.1	growth differentiation factor 11	GDF11	14.57	9.73	5.86	0.33	0.67	T	T	6.18e-10	1.86e-07	Coding
TC0800011611.hg.1	tumor necrosis factor receptor superfamily, member 11b	TNFRSF11B	14.54	8.65	4.79	1.63	0.22	T	T	5.23e-05	0.0022	Multiple_Complex
TC0600009350.hg.1	ring finger protein 217	RNF217	14.46	11	7.14	0.4	0.13	T	T	5.39e-07	5.33e-05	Multiple_Complex
TC1100007400.hg.1	tetraspanin 18	TSPAN18	14.33	13.54	9.7	1.1	0.43	T	T	1.97e-06	0.0002	Multiple_Complex
TC0700012224.hg.1	laminin, beta 1	LAMB1	14.32	14.63	10.79	0.05	0.22	T	T	1.83e-11	9.6e-09	Multiple_Complex
TC1200009239.hg.1	lysine (K)-specific methyltransferase 5A	KMT5A	14.29	12.88	9.04	0.85	0.48	T	T	2.15e-09	5.26e-07	Multiple_Complex
TC0100013651.hg.1	polyhomeotic homolog 2 (Drosophila); microRNA 3605	PHC2; MIR3605	14.11	9.26	5.44	1.16	0.47	T	T	1.59e-07	1.97e-05	Multiple_Complex
TC1100012722.hg.1	cell adhesion associated, oncogene regulated	CDON	14.01	14.2	10.39	0.66	0.54	T	T	2.13e-07	2.51e-05	Multiple_Complex
TC0800008011.hg.1	zinc finger homeobox 4	ZFHX4	13.99	10.34	6.53	0.95	0.43	T	T	8.28e-07	7.59e-05	Multiple_Complex
TC1100007729.hg.1	deltex 4, E3 ubiquitin ligase	DTX4	13.98	10.9	7.1	0.81	0.24	T	T	6.93e-07	6.6e-05	Multiple_Complex
TC1900010009.hg.1	jun D proto-oncogene	JUND	13.95	9.42	5.61	1	0.7	T	T	1.4e-06	0.0001	Coding
TC0100015596.hg.1	limb and CNS expressed 1 like	LIX1L	13.72	11.84	8.06	0.45	0.77	T	T	1.14e-07	1.48e-05	Multiple_Complex
TC1700007791.hg.1	retinoic acid receptor, alpha	RARA	13.48	11.71	7.95	0.61	0.41	T	T	8.27e-10	2.37e-07	Multiple_Complex
TC0900008545.hg.1	pregnancy-associated plasma protein A, pappalysin 1	PAPPA	13.43	9.18	5.43	0.18	0.52	T	T	1.08e-12	9.19e-10	Multiple_Complex
TC1600006492.hg.1	meteorin, glial cell differentiation regulator	METRN	13.41	8.75	5	0.75	0.3	T	T	1.41e-08	2.57e-06	Multiple_Complex
TC1000009725.hg.1	Scm-like with four mbt domains 2	SFMBT2	13.41	10.22	6.47	0.23	0.59	T	T	2.56e-10	8.79e-08	Multiple_Complex
TC1100012389.hg.1	cell adhesion molecule 1	CADM1	13.32	12.74	9.01	0.25	0.32	T	T	1.3e-11	7.21e-09	Multiple_Complex
TC0800009970.hg.1	PDZ binding kinase	PBK	13.26	11.66	7.93	1.1	0.36	T	T	2.38e-06	0.0002	Multiple_Complex
TC0100011573.hg.1	SET and MYND domain containing 2	SMYD2	13.25	11.71	7.98	0.09	0.25	T	T	1.22e-08	2.26e-06	Multiple_Complex
TC0100010775.hg.1	sterol O-acyltransferase 1	SOAT1	13.23	10.14	6.42	0.39	0.82	T	T	2.68e-10	9.04e-08	Multiple_Complex
TC1700011575.hg.1	ATP binding cassette subfamily A member 9	ABCA9	13.03	8.73	5.03	1.22	0.47	T	F	1.06e-08	2.02e-06	Multiple_Complex
TC0800007993.hg.1	peptidase inhibitor 15	PI15	13.02	8.78	5.08	1.82	0.81	T	T	0.0002	0.005	Multiple_Complex
TC1600011560.hg.1	metastasis suppressor 1-like	MTSS1L	12.75	12.95	9.27	0.57	0.5	T	T	2.38e-08	3.98e-06	Multiple_Complex
TC0100011621.hg.1	transforming growth factor beta 2; TGFB2 overlapping transcript 1	TGFB2; TGFB2-OT1	12.74	9.28	5.61	0.89	0.25	T	T	1.61e-08	2.87e-06	Multiple_Complex
TC1000008363.hg.1	phosphatase and tensin homolog	PTEN	12.63	16.85	13.19	0.21	0.51	T	T	6.55e-12	4e-09	Multiple_Complex
TC0400011192.hg.1	placenta specific 8	PLAC8	12.57	9.03	5.37	1.16	0.54	T	T	7.27e-07	6.86e-05	Multiple_Complex
TC0800011620.hg.1	ectonucleotide pyrophosphatase/phosphodiesterase 2	ENPP2	12.43	11.02	7.39	0.7	0.31	T	T	8.39e-06	0.0005	Multiple_Complex
TC1700011653.hg.1	sidekick cell adhesion molecule 2	SDK2	12.41	10.18	6.54	0.72	0.5	T	T	2.67e-07	3.04e-05	Multiple_Complex
TC1600011428.hg.1	telomeric repeat binding factor 2, interacting protein	TERF2IP	12.27	11.99	8.38	0.11	0.47	T	T	1.23e-11	6.99e-09	Coding
TC2200007356.hg.1	KDEL (Lys-Asp-Glu-Leu) endoplasmic reticulum protein retention receptor 3	KDELR3	12.16	12.36	8.75	0.11	0.7	T	T	2.05e-05	0.001	Multiple_Complex
TC0500012164.hg.1	GDNF family receptor alpha 3	GFRA3	12.15	7.66	4.06	1.98	0.42	T	F	3.93e-06	0.0003	Multiple_Complex
TC0200014771.hg.1	fibroblast activation protein alpha	FAP	12.06	6.83	3.24	1.27	0.76	T	F	2.67e-05	0.0013	Multiple_Complex
TC0500012459.hg.1	platelet-derived growth factor receptor, beta polypeptide	PDGFRB	12	11.47	7.89	0.51	0.61	T	T	2.28e-08	3.84e-06	Multiple_Complex
TC0900010277.hg.1		RP11-460E7.8	11.89	8.4	4.83	1.18	0.39	T	T	5.78e-06	0.0004	Multiple_Complex
TC0X00008468.hg.1	coiled-coil domain containing 160	CCDC160	11.78	10.58	7.02	0.43	0.55	T	T	4.77e-09	1.03e-06	Multiple_Complex
TC0200014785.hg.1	fidgetin	FIGN	11.74	12.91	9.36	0.7	0.27	T	T	1.53e-05	0.0008	Multiple_Complex
TC0400008318.hg.1	tet methylcytosine dioxygenase 2	TET2	11.62	9.47	5.93	0.22	0.88	T	T	3.63e-06	0.0003	Multiple_Complex
TC1100008673.hg.1	transmembrane protein 135	TMEM135	11.34	12.14	8.64	1.05	0.45	T	T	7.51e-06	0.0005	Multiple_Complex
TC0800008062.hg.1	zinc finger and BTB domain containing 10	ZBTB10	11.29	13.4	9.91	0.57	0.3	T	T	4.37e-09	9.5e-07	Coding
TC1100012520.hg.1	melanoma cell adhesion molecule; microRNA 6756	MCAM; MIR6756	11.01	8.59	5.13	0.97	0.28	T	T	1.21e-09	3.26e-07	Multiple_Complex
TC0400012818.hg.1	cyclin G2	CCNG2	10.98	13.17	9.71	0.52	1.31	T	T	1.4e-05	0.0007	Multiple_Complex
TC1600006737.hg.1	vasorin	VASN	10.91	8.47	5.02	1.3	0.28	T	T	8.43e-07	7.72e-05	Coding
TC0300013025.hg.1	butyrylcholinesterase	BCHE	10.9	9.73	6.28	0.68	0.66	T	T	2.77e-05	0.0013	Coding
TC2000007097.hg.1	X-linked Kx blood group related 7	XKR7	10.89	8.93	5.48	0.55	0.21	T	T	1.25e-07	1.6e-05	Multiple_Complex
TC0X00008674.hg.1	AF4/FMR2 family, member 2	AFF2	10.78	13.62	10.19	0.78	0.04	T	T	2.68e-05	0.0013	Multiple_Complex
TC0100012788.hg.1	G protein-coupled receptor 157	GPR157	10.78	10.46	7.03	0.77	0.22	T	T	2.25e-08	3.8e-06	Multiple_Complex
TC1100013030.hg.1	fibronectin leucine rich transmembrane protein 1	FLRT1	10.76	8.78	5.35	0.47	0.27	T	T	1.15e-09	3.13e-07	Coding
TC1100010505.hg.1	ankyrin repeat and BTB (POZ) domain containing 2	ABTB2	10.66	8.64	5.22	0.57	0.18	T	T	5.57e-09	1.16e-06	Multiple_Complex
TC0300012598.hg.1	retinol binding protein 1, cellular	RBP1	10.6	10.05	6.65	0.21	0.28	T	T	4.84e-08	7.26e-06	Multiple_Complex
TC0100010921.hg.1	hemicentin 1	HMCN1	10.58	12.32	8.92	0.25	0.23	T	T	2.4e-08	4.01e-06	Multiple_Complex
TC1000009830.hg.1	coiled-coil domain containing 3	CCDC3	10.55	8.33	4.93	1.03	0.78	T	T	9e-07	8.14e-05	Multiple_Complex
TC0500012631.hg.1	early B-cell factor 1	EBF1	10.55	7.57	4.17	0.84	0.21	T	F	3.17e-06	0.0002	Multiple_Complex
TC2100007911.hg.1	keratin associated protein 21-1	KRTAP21-1	10.54	8.02	4.62	0.92	0.55	T	F	1.36e-06	0.0001	Coding
TC1900009240.hg.1	guanine nucleotide binding protein (G protein), gamma 7	GNG7	10.52	11.83	8.43	0.4	0.37	T	T	1.16e-07	1.51e-05	Coding
TC1700007777.hg.1	thyroid hormone receptor, alpha	THRA	10.51	11.46	8.07	0.58	0.17	T	T	2.15e-09	5.26e-07	Multiple_Complex
TC0600011697.hg.1	coiled-coil domain containing 167	CCDC167	10.43	10.15	6.77	0.54	0.24	T	T	4.18e-07	4.34e-05	Coding
TC1200010839.hg.1	integrin alpha 5	ITGA5	10.38	11.43	8.05	0.48	0.4	T	T	5.32e-07	5.29e-05	Multiple_Complex
TC1200012043.hg.1	mediator complex subunit 13-like	MED13L	10.34	14.67	11.3	0.4	0.32	T	T	4.29e-08	6.6e-06	Multiple_Complex
TC0600014366.hg.1	phosphodiesterase 10A	PDE10A	10.34	8.08	4.71	0.98	0.5	T	T	3.67e-05	0.0016	Multiple_Complex
TC0100013182.hg.1	calcium/calmodulin-dependent protein kinase II inhibitor 1	CAMK2N1	10.32	15.19	11.83	0.25	0.42	T	T	4.45e-07	4.57e-05	Multiple_Complex
TC0700013609.hg.1	transcription factor EC	TFEC	10.24	8.33	4.98	2.65	0.15	T	F	0.0002	0.007	Multiple_Complex
TC0300008355.hg.1	BOC cell adhesion associated, oncogene regulated	BOC	10.2	11.1	7.75	0.54	0.08	T	T	5.13e-06	0.0003	Multiple_Complex
TC1600010363.hg.1	iroquois homeobox 3	IRX3	10.15	7.18	3.84	1.3	0.28	T	F	3.22e-06	0.0002	Multiple_Complex
TC1200012159.hg.1	musashi RNA binding protein 1	MSI1	10.08	15.93	12.6	0.16	0.41	T	T	1.59e-11	8.49e-09	Multiple_Complex
TC0600009772.hg.1	SAM and SH3 domain containing 1	SASH1	10.02	11.7	8.37	0.21	0.5	T	T	7.37e-05	0.0028	Multiple_Complex
TC0300006968.hg.1	CKLF-like MARVEL transmembrane domain containing 7	CMTM7	10.01	13.86	10.53	1.07	0.96	T	T	4.65e-06	0.0003	Multiple_Complex
TC0200016679.hg.1	SERTA domain containing 2	SERTAD2	9.98	8.76	5.44	0.41	0.21	T	T	3.55e-11	1.67e-08	Multiple_Complex
TC1400010584.hg.1	interferon regulatory factor 9	IRF9	9.93	9.82	6.51	0.89	0.46	T	T	1.61e-07	1.99e-05	Multiple_Complex
TC1500007238.hg.1	tropomodulin 2 (neuronal)	TMOD2	9.84	9.68	6.38	1.47	0.34	T	T	0.0032	0.0503	Multiple_Complex
TC1100009068.hg.1	neural cell adhesion molecule 1	NCAM1	9.84	13.32	10.02	1.16	0.33	T	T	3.89e-06	0.0003	Multiple_Complex
TC1200012643.hg.1	erb-b2 receptor tyrosine kinase 3	ERBB3	9.81	14.15	10.85	0.65	0.41	T	T	1.33e-06	0.0001	Multiple_Complex
TC0100017145.hg.1	plexin A2	PLXNA2	9.77	8.26	4.97	0.52	0.15	T	T	3.1e-10	1.02e-07	Multiple_Complex
TC0100008664.hg.1	growth arrest and DNA-damage-inducible, alpha	GADD45A	9.77	11.82	8.53	0.31	0.37	T	T	2.17e-07	2.56e-05	Multiple_Complex
TC0400011643.hg.1	calcium/calmodulin-dependent protein kinase II delta	CAMK2D	9.7	12.95	9.67	0.3	0.43	T	T	1.13e-06	9.74e-05	Multiple_Complex
TC2000009317.hg.1	sulfatase 2	SULF2	9.7	13.29	10.01	0.77	0.24	T	T	1.86e-06	0.0001	Multiple_Complex
TC0600008006.hg.1	forkhead box P4; microRNA 4641	FOXP4; MIR4641	9.66	9.45	6.18	0.69	0.33	T	T	5.04e-06	0.0003	Multiple_Complex
TC1700009619.hg.1	discs, large homolog 4 (Drosophila)	DLG4	9.64	12.43	9.16	0.24	0.61	T	T	1.86e-08	3.27e-06	Multiple_Complex
TC1900007836.hg.1	FXYD domain containing ion transport regulator 3; microRNA 6887	FXYD3; MIR6887	9.63	7.6	4.33	0.3	0.25	T	T	2.51e-11	1.25e-08	Multiple_Complex
TC1600008738.hg.1	forkhead box C2	FOXC2	9.63	7.88	4.61	0.22	0.21	T	T	5.58e-10	1.7e-07	Coding
TC0900010278.hg.1	Homo sapiens uncharacterized LOC286297 (LOC286297), long non-coding RNA.	LOC286297	9.55	10.16	6.91	0.44	0.53	T	T	9.79e-06	0.0006	Multiple_Complex
TC1000008904.hg.1	programmed cell death 4 (neoplastic transformation inhibitor); microRNA 4680	PDCD4; MIR4680	9.54	12.91	9.66	0.59	1.14	T	T	7.7e-05	0.0029	Multiple_Complex
TC0200007803.hg.1	lectin, galactoside-binding-like	LGALSL	9.41	14.88	11.64	0.61	0.06	T	T	1.04e-07	1.39e-05	Multiple_Complex
TC1100008736.hg.1	N-acetylated alpha-linked acidic dipeptidase 2	NAALAD2	9.37	9.82	6.59	0.97	0.75	T	T	6.85e-05	0.0027	Multiple_Complex
TC0600008972.hg.1	PR domain containing 1, with ZNF domain	PRDM1	9.36	8.46	5.24	1.29	0.41	T	F	0.0002	0.0059	Multiple_Complex
TC1900010025.hg.1	cytokine receptor-like factor 1	CRLF1	9.28	7.25	4.03	0.3	0.38	T	F	7.47e-11	3.18e-08	Multiple_Complex
TC0500011347.hg.1	hyaluronan and proteoglycan link protein 1	HAPLN1	9.22	9.21	6	3.35	0.43	T	T	0.0322	0.233	Multiple_Complex
TC2000006721.hg.1	BTB (POZ) domain containing 3	BTBD3	9.2	15.84	12.63	0.16	0.37	T	T	3.1e-09	7.17e-07	Multiple_Complex
TC0100013761.hg.1	four and a half LIM domains 3	FHL3	9.16	11.6	8.41	0.55	0.62	T	T	5.53e-07	5.44e-05	Multiple_Complex
TC1100009744.hg.1	dual specificity phosphatase 8	DUSP8	9.14	6.79	3.6	0.75	0.12	T	T	5.93e-09	1.23e-06	Multiple_Complex
TC0700013420.hg.1	actin related protein 2/3 complex subunit 1B	ARPC1B	9.12	11.82	8.63	0.18	0.29	T	T	3.06e-08	4.94e-06	Multiple_Complex
TC1900006977.hg.1	intercellular adhesion molecule 1	ICAM1	9.1	11.61	8.43	1.13	0.36	T	T	6.24e-07	6.04e-05	Multiple_Complex
TC0300013938.hg.1	vestigial-like family member 4	VGLL4	9.08	11.4	8.21	0.25	0.46	T	T	8.79e-07	7.96e-05	Multiple_Complex
TC0X00010861.hg.1	microRNA 18b	MIR18B	9.04	9.6	6.42	0.62	0.62	T	T	5.83e-07	5.69e-05	Multiple_Complex
TC0300008324.hg.1	pleckstrin homology-like domain, family B, member 2; phosphatidylinositol-specific phospholipase C, X domain containing 2	PHLDB2; PLCXD2	9.03	11.72	8.54	0.86	0.49	T	T	0.0002	0.0069	Multiple_Complex
TC1000009999.hg.1	SKI/DACH domain containing 1	SKIDA1	8.99	9.65	6.48	0.82	0.88	T	T	5.61e-07	5.5e-05	Multiple_Complex
TC0900010063.hg.1	contactin associated protein-like 3	CNTNAP3	8.99	9.05	5.88	0.54	0.39	T	T	7.9e-06	0.0005	Multiple_Complex
TC0100014349.hg.1	jun proto-oncogene	JUN	8.98	8.26	5.1	1.32	0.93	T	T	0.0002	0.005	Multiple_Complex
TC1800009086.hg.1	zinc finger protein 516	ZNF516	8.97	9.85	6.68	0.04	0.32	T	T	1.26e-11	7.06e-09	Multiple_Complex
TC0400012948.hg.1	endomucin	EMCN	8.97	8.71	5.54	0.8	0.04	T	T	3.99e-05	0.0017	Multiple_Complex
TC0600012372.hg.1	Leber congenital amaurosis 5	LCA5	8.94	9.85	6.69	1.12	1.2	T	T	0.0002	0.0062	Multiple_Complex
TC0200013616.hg.1	AF4/FMR2 family, member 3	AFF3	8.93	8.82	5.66	0.77	1	T	T	7.55e-05	0.0029	Multiple_Complex
TC0500008890.hg.1	protocadherin gamma subfamily C, 3; protocadherin gamma subfamily A, 12; protocadherin gamma subfamily B, 4; protocadherin gamma subfamily A, 8; protocadherin gamma subfamily A, 1; protocadherin gamma subfamily A, 10; protocadherin gamma subfamily A, 11; protocadherin gamma subfamily A, 2; protocadherin gamma subfamily A, 3; protocadherin gamma subfamily A, 4; protocadherin gamma subfamily A, 5; …	PCDHGC3; PCDHGA12; PCDHGB4; PCDHGA8; PCDHGA1; PCDHGA10; PCDHGA11; PCDHGA2; PCDHGA3; PCDHGA4; PCDHGA5; PCDHGA6; PCDHGA7; PCDHGA9; PCDHGB1; PCDHGB2; PCDHGB3; PCDHGB5; PCDHGB6; PCDHGB7; PCDHGC4; PCDHGC5	8.88	10.67	7.52	0.82	0.3	T	T	1.02e-08	1.96e-06	Multiple_Complex
TC1300009966.hg.1	keratin-associated protein 6-2; novel transcript	LOC647264; RP11-473M10.3	8.8	7.29	4.15	0.72	0.1	T	T	2.69e-06	0.0002	Multiple_Complex
TC1200011460.hg.1	KIT ligand	KITLG	8.8	10.55	7.41	1.05	0.63	T	T	0.001	0.0212	Multiple_Complex
TC0100015023.hg.1	dihydropyrimidine dehydrogenase	DPYD	8.75	9.81	6.68	0.31	0.38	T	T	7.43e-09	1.5e-06	Multiple_Complex
TC0200013192.hg.1	leucine rich repeat transmembrane neuronal 1	LRRTM1	8.69	6.62	3.5	2.6	0.39	T	T	0.0075	0.0904	Coding
TC1600010375.hg.1	colorectal neoplasia differentially expressed (non-protein coding)	CRNDE	8.59	13.24	10.13	0.63	0.58	T	T	4.07e-09	8.95e-07	Multiple_Complex
TC0200016559.hg.1	Bardet-Biedl syndrome 5	BBS5	8.55	9.01	5.91	0.17	0.32	T	T	1.1e-09	3.02e-07	Multiple_Complex
TC1100010580.hg.1	leucine rich repeat containing 4C	LRRC4C	8.51	8.5	5.41	0.89	0.15	T	T	1.19e-05	0.0007	Multiple_Complex
TC1000008182.hg.1	zinc finger, MIZ-type containing 1	ZMIZ1	8.51	13.08	10	0.34	0.45	T	T	5.43e-10	1.66e-07	Multiple_Complex
TC0X00010858.hg.1	microRNA 92a-2	MIR92A2	8.45	8.85	5.77	1.17	0.69	T	T	0.0002	0.0055	Multiple_Complex
TC1200010592.hg.1	adenylate cyclase 6; microRNA 4701	ADCY6; MIR4701	8.43	10.78	7.7	1.01	0.22	T	T	5e-09	1.06e-06	Multiple_Complex
TC0200006725.hg.1	growth regulation by estrogen in breast cancer 1	GREB1	8.42	12.79	9.72	0.14	0.38	T	T	2.72e-08	4.48e-06	Multiple_Complex
TC1700012457.hg.1	axin 2	AXIN2	8.4	10.28	7.21	0.06	0.13	T	T	2.3e-08	3.87e-06	Multiple_Complex
TC0600014217.hg.1	serpin peptidase inhibitor, clade B (ovalbumin), member 1	SERPINB1	8.39	12.82	9.75	0.69	0.44	T	T	7.9e-07	7.33e-05	Multiple_Complex
TC1000007272.hg.1	cAMP responsive element modulator	CREM	8.29	11.48	8.43	0.2	0.43	T	T	4.15e-09	9.1e-07	Multiple_Complex
TC0X00010032.hg.1	Cbp/p300-interacting transactivator, with Glu/Asp rich carboxy-terminal domain, 1	CITED1	8.25	7.4	4.35	0.45	0.18	T	T	1.76e-06	0.0001	Coding
TC1500007143.hg.1	sema domain, transmembrane domain (TM), and cytoplasmic domain, (semaphorin) 6D	SEMA6D	8.24	9.95	6.9	0.13	0.28	T	T	6.1e-05	0.0024	Multiple_Complex
TC0300013255.hg.1	zinc finger, matrin-type 3	ZMAT3	8.19	11.19	8.16	0.46	0.71	T	T	0.0004	0.0112	Multiple_Complex
TC0100009221.hg.1	vascular cell adhesion molecule 1	VCAM1	8.18	7.3	4.26	1.98	0.12	T	T	2.92e-05	0.0013	Multiple_Complex
TC0X00008014.hg.1	transmembrane protein 31	TMEM31	8.13	10.26	7.23	0.18	0.54	T	T	6.23e-08	8.96e-06	Coding
TC1600010825.hg.1	zinc finger homeobox 3	ZFHX3	8.09	6.61	3.59	0.27	0.47	T	F	2.82e-06	0.0002	Multiple_Complex
TC0200008801.hg.1	sulfotransferase family 1C member 4	SULT1C4	8.06	11.67	8.66	0.58	0.46	T	T	4.56e-06	0.0003	Multiple_Complex
TC0200010164.hg.1	sperm specific antigen 2	SSFA2	8.05	8.73	5.72	0.83	1	T	T	2.19e-05	0.0011	Multiple_Complex
TC1100011744.hg.1	GRB2-associated binding protein 2	GAB2	7.99	7.71	4.71	0.58	0.25	T	T	2.29e-07	2.67e-05	Multiple_Complex
TC2100006909.hg.1	hormonally up-regulated Neu-associated kinase	HUNK	7.97	10.28	7.28	0.61	0.55	T	T	3.09e-06	0.0002	Multiple_Complex
TC1500010886.hg.1	calmodulin-like 4	CALML4	7.9	13.46	10.48	0.17	0.38	T	T	2.66e-09	6.28e-07	Multiple_Complex
TC0400006930.hg.1	cytoplasmic polyadenylation element binding protein 2	CPEB2	7.89	7.86	4.88	0.69	0.05	T	T	1.07e-06	9.32e-05	Multiple_Complex
TC0500007376.hg.1	follistatin	FST	7.89	10.06	7.08	0.42	0.66	T	T	0.0009	0.0189	Multiple_Complex
TC1200007646.hg.1	activin A receptor type IL	ACVRL1	7.87	7.37	4.39	0.51	0.23	T	T	2.62e-10	8.93e-08	Multiple_Complex
TC0800006927.hg.1	lipoprotein lipase	LPL	7.84	9.6	6.62	1.2	0.28	T	T	0.0002	0.0055	Multiple_Complex
TC0X00007310.hg.1	TSPY-like 2	TSPYL2	7.83	14.39	11.42	0.7	0.07	T	T	2.32e-09	5.59e-07	Multiple_Complex
TC0300013469.hg.1	somatostatin	SST	7.81	7.06	4.1	1.49	0.1	T	F	0.0126	0.1291	Coding
TC0600009332.hg.1	fatty acid binding protein 7, brain	FABP7	7.74	13	10.05	0.62	1.08	T	T	2.62e-07	2.98e-05	Coding
TC1400006723.hg.1	REC8 meiotic recombination protein	REC8	7.73	12.54	9.59	0.8	0.4	T	T	1.01e-08	1.95e-06	Multiple_Complex
TC1100010718.hg.1	LDL receptor related protein 4	LRP4	7.7	10.47	7.53	0.38	0.13	T	T	4.34e-07	4.47e-05	Multiple_Complex
TC2000007760.hg.1	teashirt zinc finger homeobox 2	TSHZ2	7.69	6.43	3.48	0.2	0.16	T	F	7.23e-05	0.0028	Coding
TC0200009936.hg.1	glutamate decarboxylase 1	GAD1	7.66	9.56	6.62	1.37	0.82	T	T	0.014	0.1383	Multiple_Complex
TC0500013349.hg.1	fibrillin 2	FBN2	7.66	9.69	6.75	0.14	0.16	T	T	3.01e-05	0.0014	Multiple_Complex
TC1200010928.hg.1	small nucleolar RNA, C/D box 59B	SNORD59B	7.58	11.86	8.94	0.64	0.35	T	T	1.52e-05	0.0008	Multiple_Complex
TC1200008269.hg.1	neuron navigator 3	NAV3	7.56	7.85	4.93	0.72	0.73	T	T	7.74e-05	0.0029	Multiple_Complex
TC1300007718.hg.1	glypican 6	GPC6	7.51	11.94	9.03	0.42	1.04	T	T	2.5e-05	0.0012	Multiple_Complex
TC0100017420.hg.1	dual specificity phosphatase 10	DUSP10	7.48	6.91	4.01	1.24	0.6	T	T	0.0001	0.0041	Multiple_Complex
TC1000007361.hg.1		RP11-96F8.1	7.42	7.93	5.03	0.89	0.36	T	T	4.21e-05	0.0018	Multiple_Complex
TC0100015945.hg.1	thrombospondin 3	THBS3	7.41	10.13	7.24	0.56	0.59	T	T	1.25e-07	1.61e-05	Multiple_Complex
TC0600014361.hg.1	CNKSR family member 3	CNKSR3	7.37	9.54	6.66	0.44	0.62	T	T	2.66e-06	0.0002	Multiple_Complex
TC0200012863.hg.1	sprouty-related, EVH1 domain containing 2	SPRED2	7.34	12.93	10.06	0.24	0.4	T	T	2.5e-07	2.87e-05	Multiple_Complex
TC1700006524.hg.1	serpin peptidase inhibitor, clade F (alpha-2 antiplasmin, pigment epithelium derived factor), member 1	SERPINF1	7.33	14.07	11.2	0.83	0.24	T	T	1.81e-06	0.0001	Multiple_Complex
TC0100015093.hg.1	olfactomedin 3	OLFM3	7.32	7.4	4.53	0.81	0.59	T	F	1.26e-06	0.0001	Multiple_Complex
TC0500008785.hg.1	early growth response 1	EGR1	7.28	12.98	10.11	2.13	0.85	T	T	0.0031	0.0486	Coding
TC1000011370.hg.1	actin, alpha 2, smooth muscle, aorta	ACTA2	7.21	8.65	5.8	1.73	0.21	T	T	0.0003	0.0085	Multiple_Complex
TC2000008242.hg.1	ring finger protein 24	RNF24	7.17	12.91	10.07	0.57	0.08	T	T	0.0006	0.0145	Multiple_Complex
TC1900010632.hg.1	sirtuin 2	SIRT2	7.14	9.05	6.21	0.72	0.28	T	T	1.81e-06	0.0001	Multiple_Complex
TC0900009414.hg.1	regulatory factor X, 3 (influences HLA class II expression)	RFX3	7.13	11.43	8.6	0.65	0.57	T	T	9.27e-06	0.0005	Multiple_Complex
TC1500010897.hg.1	cholinergic receptor, nicotinic beta 4	CHRNB4	7.09	10.86	8.03	0.9	0.48	T	T	0.0065	0.0822	Coding
TC2100007663.hg.1	BTG family, member 3	BTG3	7.09	13.08	10.26	0.46	0.11	T	T	3.25e-09	7.43e-07	Multiple_Complex
TC2000006791.hg.1	proprotein convertase subtilisin/kexin type 2	PCSK2	7.08	8.85	6.02	2.51	0.36	T	T	7.4e-06	0.0004	Multiple_Complex
TC1700012274.hg.1	integrin beta 3	ITGB3	7.08	6.38	3.55	0.83	0.5	T	F	5.42e-07	5.36e-05	Multiple_Complex
TC0100011096.hg.1	NIMA-related kinase 7	NEK7	7.07	10.53	7.71	0.46	0.94	T	T	0.0001	0.0044	Multiple_Complex
TC0X00010837.hg.1	muscleblind-like splicing regulator 3	MBNL3	7.06	9.36	6.54	1.26	0.32	T	T	0.003	0.0484	Multiple_Complex
TC0100016276.hg.1	family with sequence similarity 78, member B	FAM78B	7.05	7.97	5.15	0.67	0.39	T	T	1.61e-07	1.98e-05	Coding
TC2200006495.hg.1		AC006548.19	6.93	8.73	5.93	0.64	0.41	T	T	2.04e-05	0.001	Multiple_Complex
TC0400012487.hg.1	vascular endothelial growth factor C	VEGFC	6.89	8.85	6.07	0.3	0.52	T	T	1.92e-07	2.31e-05	Multiple_Complex
TC0800010258.hg.1	K(lysine) acetyltransferase 6A	KAT6A	6.88	12.79	10.01	0.46	0.44	T	T	5.62e-08	8.22e-06	Multiple_Complex
TC2200007309.hg.1	SH3-domain binding protein 1; pyridoxal (pyridoxine, vitamin B6) phosphatase	SH3BP1; PDXP	6.84	12.89	10.12	0.2	0.54	T	T	1.17e-06	0.0001	Multiple_Complex
TC0300009713.hg.1	EPH receptor B3	EPHB3	6.79	7.55	4.79	0.74	0.12	T	T	4.82e-08	7.24e-06	Multiple_Complex
TC1700007796.hg.1	insulin like growth factor binding protein 4	IGFBP4	6.76	11.07	8.32	0.12	0.56	T	T	7.26e-08	1.02e-05	Multiple_Complex
TC1000012011.hg.1	regulator of G-protein signaling 10	RGS10	6.72	12.51	9.77	0.4	0.44	T	T	9.76e-08	1.32e-05	Multiple_Complex
TC0700007132.hg.1	FK506 binding protein 9	FKBP9	6.7	11.94	9.2	0.15	0.62	T	T	1.36e-06	0.0001	Multiple_Complex
TC1200007153.hg.1	PTPRF interacting protein, binding protein 1 (liprin beta 1)	PPFIBP1	6.68	13.24	10.5	0.48	0.38	T	T	4.36e-07	4.48e-05	Multiple_Complex
TC0200007115.hg.1	CAP-GLY domain containing linker protein family, member 4	CLIP4	6.68	8.23	5.49	0.66	0.68	T	F	3.06e-08	4.94e-06	Multiple_Complex
TC1800007986.hg.1	laminin, alpha 1	LAMA1	6.67	14.79	12.06	0.22	0.28	T	T	2.49e-09	5.91e-07	Multiple_Complex
TC1700012466.hg.1	long intergenic non-protein coding RNA 673; long intergenic non-protein coding RNA 511	LINC00673; LINC00511	6.67	8.22	5.48	0.49	0.25	T	T	1.77e-06	0.0001	Multiple_Complex
TC0100010939.hg.1	phospholipase A2, group IVA (cytosolic, calcium-dependent)	PLA2G4A	6.66	8.44	5.71	1.26	0.36	T	T	0.001	0.0211	Multiple_Complex
TC1900011936.hg.1	zinc finger protein 781	ZNF781	6.64	6.43	3.7	0.26	0.39	T	F	3.54e-06	0.0002	Multiple_Complex
TC1000006891.hg.1	vimentin	VIM	6.61	14.44	11.72	0.16	0.89	T	T	1.12e-07	1.46e-05	Multiple_Complex
TC1700007520.hg.1	cyclin-dependent kinase 5, regulatory subunit 1 (p35)	CDK5R1	6.57	8.56	5.85	0.63	0.05	T	T	3.52e-06	0.0002	Multiple_Complex
TC0300012397.hg.1	plexin D1	PLXND1	6.54	10.36	7.65	1	0.38	T	T	2.15e-05	0.0011	Multiple_Complex
TC1700007080.hg.1	retinoic acid induced 1	RAI1	6.52	7.25	4.55	0.19	0.31	T	T	4.83e-10	1.5e-07	Multiple_Complex
TC1700010990.hg.1	homeobox B1	HOXB1	6.49	7.28	4.59	1.6	0.25	T	T	5.75e-05	0.0023	Coding
TC1700009954.hg.1	target of myb1 like 2 membrane trafficking protein	TOM1L2	6.49	9.12	6.42	0.84	0.41	T	T	6.08e-06	0.0004	Multiple_Complex
TC0500009224.hg.1	LSM11, U7 small nuclear RNA associated	LSM11	6.45	10.48	7.79	0.3	0.52	T	T	7.81e-09	1.56e-06	Coding
TC0200014792.hg.1	cordon-bleu WH2 repeat protein like 1	COBLL1	6.45	10.36	7.67	1.21	0.17	T	T	0.0001	0.0045	Multiple_Complex
TC0X00007951.hg.1	armadillo repeat containing, X-linked 3	ARMCX3	6.4	8.44	5.76	0.87	0.92	T	T	0.0002	0.0068	Multiple_Complex
TC0100013545.hg.1	syndecan 3	SDC3	6.34	14.03	11.37	1.17	0.59	T	T	1.48e-05	0.0008	Multiple_Complex
TC1400008606.hg.1	ribonuclease, RNase A family, 1 (pancreatic)	RNASE1	6.32	8.31	5.65	0.74	0.36	T	T	0.0062	0.0791	Multiple_Complex
TC0600009353.hg.1	tumor protein D52-like 1	TPD52L1	6.3	11.23	8.57	2.28	0.26	T	T	0.0026	0.0431	Multiple_Complex
TC0800009816.hg.1	GDNF family receptor alpha 2	GFRA2	6.29	8.14	5.48	0.59	0.25	T	T	0.0027	0.0448	Multiple_Complex
TC1000011081.hg.1	zinc finger protein 503	ZNF503	6.27	8	5.35	1.05	0.55	T	T	1.05e-05	0.0006	Multiple_Complex
TC1100009043.hg.1	DIX domain containing 1	DIXDC1	6.26	12.49	9.84	0.91	0.53	T	T	1.32e-06	0.0001	Multiple_Complex
TC1000010827.hg.1	DnaJ (Hsp40) homolog, subfamily C, member 12	DNAJC12	6.25	8.61	5.96	0.82	0.19	T	T	4.92e-06	0.0003	Multiple_Complex
TC1200009867.hg.1		RP11-599J14.2	6.25	10.62	7.98	0.53	0.37	T	T	0.0006	0.0148	Multiple_Complex
TC2100007821.hg.1	ADAM metallopeptidase with thrombospondin type 1 motif 1	ADAMTS1	6.24	10.96	8.32	0.21	0.57	T	T	1.76e-06	0.0001	Multiple_Complex
TC0100018418.hg.1	intermediate filament family orphan 2	IFFO2	6.23	9.3	6.66	1.03	0.52	T	T	2.3e-07	2.68e-05	Multiple_Complex
TC1600007014.hg.1	nudE neurodevelopment protein 1; microRNA 484	NDE1; MIR484	6.22	12.7	10.07	0.91	0.88	T	T	8.06e-05	0.003	Multiple_Complex
TC1200009847.hg.1	alpha-2-macroglobulin	A2M	6.21	6.91	4.27	1.3	0.09	T	T	0.0007	0.0168	Multiple_Complex
TC0300007367.hg.1	kelch domain containing 8B	KLHDC8B	6.2	8.38	5.75	0.27	0.16	T	T	8.76e-09	1.72e-06	Multiple_Complex
TC1200010450.hg.1	YY1 associated factor 2	YAF2	6.2	8.45	5.82	0.59	0.3	T	T	9.15e-09	1.78e-06	Multiple_Complex
TC1100008392.hg.1	pleckstrin homology domain containing, family B (evectins) member 1	PLEKHB1	6.19	11.36	8.74	1.09	0.35	T	T	2.44e-06	0.0002	Multiple_Complex
TC0200010658.hg.1	carbamoyl-phosphate synthase 1	CPS1	6.17	10.85	8.22	0.75	0.45	T	T	2.11e-05	0.001	Multiple_Complex
TC2000007117.hg.1	additional sex combs like transcriptional regulator 1	ASXL1	6.15	12.51	9.89	0.09	0.73	T	T	7.33e-08	1.03e-05	Multiple_Complex
TC1400007259.hg.1	pellino E3 ubiquitin protein ligase family member 2	PELI2	6.13	11.28	8.66	0.22	0.37	T	T	2.05e-06	0.0002	Multiple_Complex
TC0700007034.hg.1	cAMP responsive element binding protein 5	CREB5	6.1	9.61	7	1.2	0.37	T	T	0.0004	0.01	Multiple_Complex
TC1100008139.hg.1	aryl hydrocarbon receptor interacting protein	AIP	6.08	10.94	8.34	0.29	0.35	T	T	2.67e-06	0.0002	Multiple_Complex
TC1600007982.hg.1	homocysteine-inducible, endoplasmic reticulum stress-inducible, ubiquitin-like domain member 1	HERPUD1	6.08	11.6	8.99	1.06	0.55	T	T	9.34e-05	0.0034	Multiple_Complex
TC0600007847.hg.1	cyclin-dependent kinase inhibitor 1A (p21, Cip1)	CDKN1A	6.06	8.66	6.06	1.6	0.72	T	T	6.62e-05	0.0026	Multiple_Complex
TC1100013084.hg.1	angiomotin like 1	AMOTL1	6.05	11.39	8.8	0.17	0.31	T	T	1.66e-06	0.0001	Multiple_Complex
TC0300011455.hg.1	FERM domain containing 4B	FRMD4B	6.04	11.32	8.73	1.29	0.44	T	T	8.32e-05	0.0031	Multiple_Complex
TC0400007782.hg.1	mucin 7, secreted	MUC7	6.03	6.58	3.99	0.96	0.33	T	F	9.35e-08	1.27e-05	Multiple_Complex
TC1200012273.hg.1	Rab interacting lysosomal protein-like 1	RILPL1	5.95	8.66	6.09	0.3	0.21	T	T	3.27e-08	5.26e-06	Multiple_Complex
TC0100018285.hg.1	neuroblastoma breakpoint family, member 19	NBPF19	5.94	11.12	8.55	0.26	0.82	T	T	1.03e-07	1.37e-05	Coding
TC0100018481.hg.1	notch 2 N-terminal like	NOTCH2NL	5.93	8.95	6.39	0.2	0.45	T	T	1.87e-08	3.27e-06	Coding
TC0700011383.hg.1	Shwachman-Bodian-Diamond syndrome	SBDS	5.92	11.69	9.13	0.3	0.58	T	T	1.66e-06	0.0001	Multiple_Complex
TC0600012885.hg.1	laminin, alpha 4	LAMA4	5.92	8.4	5.84	0.75	0.12	T	T	8.26e-07	7.58e-05	Multiple_Complex
TC2000010002.hg.1	nuclear receptor coactivator 6	NCOA6	5.83	9.27	6.73	0.59	0.56	T	T	3.35e-06	0.0002	Multiple_Complex
TC1700011264.hg.1	Small nucleolar RNA U3 [Source:RFAM;Acc:RF00012]	U3	5.8	10.68	8.14	0.76	0.04	T	T	0.0014	0.0276	Multiple_Complex
TC0100007451.hg.1	CD52 molecule	CD52	5.79	9.1	6.56	3.49	0.12	T	T	0.0035	0.054	Multiple_Complex
TC0100012469.hg.1	matrix-remodelling associated 8	MXRA8	5.76	9.29	6.76	1.66	0.9	T	T	1.99e-05	0.001	Multiple_Complex
TC0600012863.hg.1	REV3 like, DNA directed polymerase zeta catalytic subunit	REV3L	5.75	9.93	7.41	0.85	0.12	T	T	1.91e-05	0.001	Multiple_Complex
TC1400007478.hg.1	gephyrin	GPHN	5.74	12.65	10.13	0.19	0.33	T	T	3.58e-07	3.84e-05	Multiple_Complex
TC0100009645.hg.1	Uncharacterized protein [Source:UniProtKB/TrEMBL;Acc:A0A096LNW5]	AC253572.1	5.74	10.64	8.12	0.45	0.75	T	T	2.43e-08	4.06e-06	Coding
TC1700008189.hg.1		RP11-501C14.7	5.72	10.3	7.78	0.52	0.78	T	T	6.55e-06	0.0004	Multiple_Complex
TC1600010561.hg.1	cadherin 11, type 2, OB-cadherin (osteoblast)	CDH11	5.71	9.62	7.1	0.19	0.31	T	T	0.0057	0.0751	Multiple_Complex
TC1100009412.hg.1	PBX/knotted 1 homeobox 2	PKNOX2	5.7	8.26	5.75	0.87	0.99	T	T	0.0007	0.0156	Multiple_Complex
TC1100008236.hg.1	cyclin D1	CCND1	5.68	14.56	12.06	0.08	0.18	T	T	5.19e-08	7.66e-06	Multiple_Complex
TC1400010643.hg.1	serpin peptidase inhibitor, clade A (alpha-1 antiproteinase, antitrypsin), member 5	SERPINA5	5.68	6.15	3.65	1.8	0.28	T	F	0.0001	0.0043	Multiple_Complex
TC1200010024.hg.1	Rho GDP dissociation inhibitor (GDI) beta	ARHGDIB	5.68	7.25	4.74	0.44	0.51	T	F	1.5e-08	2.71e-06	Multiple_Complex
TC0700010857.hg.1	GLI family zinc finger 3	GLI3	5.67	12.31	9.8	0.72	0.21	T	T	1.15e-05	0.0006	Multiple_Complex
TC2200007783.hg.1	Pim-3 proto-oncogene, serine/threonine kinase	PIM3	5.67	8.46	5.96	0.65	0.03	T	T	2.48e-08	4.13e-06	Multiple_Complex
TC0800009974.hg.1		RP11-597M17.3	5.66	5.59	3.09	0.33	0.1	T	F	1.96e-10	6.96e-08	Multiple_Complex
TC0800009872.hg.1	tumor necrosis factor receptor superfamily, member 10d, decoy with truncated death domain	TNFRSF10D	5.65	11.61	9.11	0.44	1.31	T	T	0.0005	0.0119	Coding
TC1700009731.hg.1	growth arrest-specific 7	GAS7	5.64	8.55	6.05	0.54	0.11	T	T	1.17e-06	9.97e-05	Multiple_Complex
TC1500009504.hg.1	pygopus family PHD finger 1	PYGO1	5.63	8.49	5.99	0.54	0.59	T	T	1.08e-05	0.0006	Multiple_Complex
TC0900008491.hg.1	regulator of G-protein signaling 3	RGS3	5.63	8.07	5.57	1.23	0.37	T	T	3.19e-05	0.0014	Multiple_Complex
TC1900011944.hg.1	F-box protein 17	FBXO17	5.61	9.24	6.76	0.18	0.79	T	T	1.26e-05	0.0007	Multiple_Complex
TC2200007303.hg.1	CDC42 effector protein (Rho GTPase binding) 1	CDC42EP1	5.61	11.6	9.11	0.33	0.56	T	T	9.87e-07	8.71e-05	Multiple_Complex
TC0600009498.hg.1	EYA transcriptional coactivator and phosphatase 4	EYA4	5.6	6.64	4.16	1	0.49	T	F	0.0003	0.0075	Multiple_Complex
TC1400007320.hg.1	dishevelled-binding antagonist of beta-catenin 1	DACT1	5.58	9.65	7.17	0.32	0.74	T	T	0.0076	0.0916	Multiple_Complex
TC1100011141.hg.1	REST corepressor 2	RCOR2	5.58	10.03	7.55	0.56	0.4	T	T	1.06e-06	9.25e-05	Multiple_Complex
TC0900008587.hg.1	toll-like receptor 4	TLR4	5.56	6.95	4.48	1.72	0.17	T	F	3.35e-05	0.0015	Multiple_Complex
TC0300011259.hg.1	Rho guanine nucleotide exchange factor 3	ARHGEF3	5.55	7.27	4.8	0.98	0.62	T	T	2.3e-05	0.0011	Multiple_Complex
TC0100009646.hg.1	neuroblastoma breakpoint family, member 26	NBPF26	5.55	11.24	8.77	0.7	0.38	T	T	2.44e-05	0.0012	Coding
TC0400007582.hg.1	KIAA1211	KIAA1211	5.54	9.6	7.12	0.15	0.31	T	T	7.2e-07	6.81e-05	Multiple_Complex
TC0400012945.hg.1	hydroxysteroid (17-beta) dehydrogenase 11	HSD17B11	5.54	13.9	11.44	0.8	0.36	T	T	3.04e-05	0.0014	Multiple_Complex
TC1500007633.hg.1	SMAD family member 3	SMAD3	5.53	10.8	8.33	0.86	0.42	T	T	5.92e-07	5.77e-05	Multiple_Complex
TC1800008317.hg.1	zinc finger protein 521	ZNF521	5.52	10.96	8.49	0.24	0.37	T	T	2.21e-07	2.6e-05	Multiple_Complex
TC0100018507.hg.1	Rho/Rac guanine nucleotide exchange factor 2	ARHGEF2	5.52	12.84	10.37	0.59	0.04	T	T	1.04e-07	1.39e-05	Multiple_Complex
TC0300006691.hg.1	FYVE, RhoGEF and PH domain containing 5	FGD5	5.51	9.14	6.67	0.37	0.09	T	T	4.08e-07	4.26e-05	Multiple_Complex
TC0800012285.hg.1	homeobox containing 1	HMBOX1	5.51	12.81	10.35	0.03	0.41	T	T	2.9e-09	6.77e-07	Multiple_Complex
TC0X00008526.hg.1	four and a half LIM domains 1	FHL1	5.49	11.54	9.09	0.54	1.01	T	T	1.5e-05	0.0008	Multiple_Complex
TC0100011566.hg.1	prospero homeobox 1	PROX1	5.47	7.76	5.31	0.89	0.74	T	F	0.0001	0.0039	Multiple_Complex
TC2100007072.hg.1	tetratricopeptide repeat domain 3	TTC3	5.46	13.6	11.15	0.44	0.55	T	T	4.64e-06	0.0003	Multiple_Complex
TC0100007147.hg.1	paired box 7	PAX7	5.45	7.01	4.57	1.01	0.16	T	T	1.1e-06	9.5e-05	Multiple_Complex
TC0100018479.hg.1	notch 2 N-terminal like	NOTCH2NL	5.45	12.39	9.95	0.19	0.59	T	T	8.22e-09	1.64e-06	Multiple_Complex
TC1100010623.hg.1	ALX homeobox 4	ALX4	5.44	5.23	2.78	1.36	0.08	T	F	4.95e-06	0.0003	Coding
TC0600013190.hg.1	monooxygenase, DBH-like 1	MOXD1	5.43	10.34	7.89	0.58	0.75	T	T	0.0057	0.0748	Multiple_Complex
TC0100015483.hg.1	notch 2	NOTCH2	5.41	12.65	10.21	0.25	0.35	T	T	1.38e-08	2.53e-06	Multiple_Complex
TC0100018238.hg.1	DnaJ (Hsp40) homolog, subfamily B, member 4	DNAJB4	5.4	11.64	9.21	1.11	0.85	T	T	0.0001	0.0048	Multiple_Complex
TC1400008816.hg.1	protein kinase D1	PRKD1	5.38	9.21	6.78	0.32	0.23	T	T	3.1e-06	0.0002	Multiple_Complex
TC1100009168.hg.1	SID1 transmembrane family, member 2	SIDT2	5.38	10.76	8.34	0.69	0.41	T	T	2.04e-08	3.52e-06	Multiple_Complex
TC0100013611.hg.1	BSD domain containing 1	BSDC1	5.38	9.98	7.56	0.63	0.16	T	T	1.62e-05	0.0008	Multiple_Complex
TC0600009019.hg.1	sine oculis binding protein homolog	SOBP	5.37	9.65	7.22	0.27	0.08	T	T	3.64e-09	8.2e-07	Multiple_Complex
TC1500008100.hg.1	WAS protein homolog associated with actin, golgi membranes and microtubules	WHAMM	5.35	10.18	7.76	0.51	0.07	T	T	2.57e-08	4.27e-06	Multiple_Complex
TC1200010809.hg.1	activating transcription factor 7; neuropeptide FF-amide peptide precursor	ATF7; NPFF	5.35	11.9	9.48	0.74	0.15	T	T	4.82e-05	0.002	Multiple_Complex
TC1400007145.hg.1	FERM domain containing 6	FRMD6	5.33	8.99	6.58	0.76	0.28	T	T	3.34e-06	0.0002	Multiple_Complex
TC2200007439.hg.1	melanin-concentrating hormone receptor 1	MCHR1	5.32	7.79	5.38	0.83	0.4	T	T	1.9e-06	0.0001	Multiple_Complex
TC0X00008470.hg.1	PHD finger protein 6	PHF6	5.32	16.36	13.95	0.76	0.56	T	T	1.43e-05	0.0008	Multiple_Complex
TC1500009429.hg.1	Dmx-like 2	DMXL2	5.31	11.36	8.95	1.02	0.7	T	T	0.0023	0.0389	Multiple_Complex
TC0100017836.hg.1	lysosomal trafficking regulator	LYST	5.29	6.35	3.95	0.39	0.15	T	F	7.46e-08	1.04e-05	Multiple_Complex
TC1100009026.hg.1	salt-inducible kinase 2	SIK2	5.27	11.4	9	0.48	0.37	T	T	4.97e-07	5e-05	Multiple_Complex
TC0500009488.hg.1	CREB3 regulatory factor	CREBRF	5.26	8.33	5.93	0.41	0.98	T	T	0.0076	0.0916	Multiple_Complex
TC0100017793.hg.1	interferon regulatory factor 2 binding protein 2	IRF2BP2	5.26	10.09	7.69	0.85	0.33	T	T	7.47e-07	7e-05	Multiple_Complex
TC1700012431.hg.1	homeobox B2	HOXB2	5.26	7.56	5.17	1.42	0.06	T	F	0.0007	0.0158	Multiple_Complex
TC1100006726.hg.1	sphingomyelin phosphodiesterase 1, acid lysosomal	SMPD1	5.24	7.62	5.23	0.84	0.4	T	F	3.46e-06	0.0002	Multiple_Complex
TC0900007680.hg.1	transducin-like enhancer of split 4	TLE4	5.24	14.1	11.71	0.05	0.08	T	T	0.0002	0.0073	Multiple_Complex
TC0500012842.hg.1	dual specificity phosphatase 1	DUSP1	5.23	8.18	5.79	2.05	0.57	T	T	0.0001	0.0037	Multiple_Complex
TC2200007620.hg.1	fibulin 1	FBLN1	5.23	13.47	11.09	0.67	0.38	T	T	3.26e-06	0.0002	Multiple_Complex
TC1100010440.hg.1	metallophosphoesterase domain containing 2	MPPED2	5.22	8.63	6.24	0.31	0.09	T	T	2.53e-07	2.9e-05	Multiple_Complex
TC0700011344.hg.1	glucuronidase, beta	GUSB	5.21	10.67	8.29	0.27	0.42	T	T	6.4e-09	1.31e-06	Multiple_Complex
TC0500013336.hg.1	single-stranded DNA binding protein 2	SSBP2	5.2	14.52	12.14	0.88	0.73	T	T	9.67e-07	8.58e-05	Multiple_Complex
TC1100006879.hg.1	parvin, alpha	PARVA	5.19	13.59	11.22	0.64	0.04	T	T	9.3e-07	8.36e-05	Multiple_Complex
TC0400007345.hg.1	LIM and calponin homology domains 1	LIMCH1	5.19	6.44	4.06	0.14	0.07	T	F	8.12e-05	0.003	Multiple_Complex
TC1100011643.hg.1	arrestin, beta 1	ARRB1	5.18	12.49	10.12	0.43	0.43	T	T	5.94e-08	8.61e-06	Multiple_Complex
TC0100013854.hg.1	sex comb on midleg homolog 1 (Drosophila)	SCMH1	5.17	10.29	7.92	0.38	0.47	T	T	5.38e-06	0.0003	Multiple_Complex
TC0200015397.hg.1	CDC like kinase 1	CLK1	5.16	8.86	6.49	0.85	0.39	T	T	8.79e-06	0.0005	Multiple_Complex
TC0500011672.hg.1	praja ring finger 2, E3 ubiquitin protein ligase	PJA2	5.15	13.64	11.28	0.78	0.92	T	T	0.0039	0.0582	Multiple_Complex
TC0700010689.hg.1	retinitis pigmentosa 9 pseudogene	RP9P	5.15	8.12	5.76	0.08	0.54	T	T	4.72e-08	7.15e-06	Multiple_Complex
TC0100009641.hg.1	neuroblastoma breakpoint family, member 8	NBPF8	5.13	8.88	6.52	0.86	0.33	T	T	0.0001	0.0038	Multiple_Complex
TC0600011376.hg.1	protein phosphatase 1, regulatory subunit 18	PPP1R18	5.1	9.61	7.27	0.61	0.29	T	T	5.09e-07	5.08e-05	Multiple_Complex
TC0200007446.hg.1	protein kinase C, epsilon	PRKCE	5.09	9.41	7.06	0.36	0.51	T	T	5.61e-07	5.5e-05	Multiple_Complex
TC2200008356.hg.1	tetratricopeptide repeat domain 28	TTC28	5.08	11.22	8.88	0.4	0.51	T	T	1.25e-07	1.6e-05	Multiple_Complex
TC1500010764.hg.1	CDC like kinase 3	CLK3	5.05	12.7	10.37	0.69	0.74	T	T	1.84e-06	0.0001	Multiple_Complex
TC0200008270.hg.1	atonal bHLH transcription factor 8	ATOH8	5.04	5.87	3.54	0.48	0.14	T	F	2.98e-07	3.33e-05	Multiple_Complex
TC1600011398.hg.1	matrix metallopeptidase 2	MMP2	5.03	14.9	12.57	0.09	0.19	T	T	5.03e-07	5.04e-05	Multiple_Complex
TC0200014246.hg.1	POTE ankyrin domain family, member F	POTEF	5.02	11.79	9.46	0.5	0.47	T	T	7.54e-06	0.0005	Multiple_Complex
TC1400010648.hg.1	bradykinin receptor B1	BDKRB1	5.02	6.81	4.48	1.07	0.16	T	T	1.96e-07	2.36e-05	Multiple_Complex
TC0X00007504.hg.1	StAR-related lipid transfer domain containing 8	STARD8	4.98	7.23	4.92	0.86	0.56	T	T	1.12e-05	0.0006	Multiple_Complex
TC1700012193.hg.1	nudE neurodevelopment protein 1-like 1	NDEL1	4.97	13.03	10.71	0.42	0.39	T	T	1.01e-07	1.36e-05	Multiple_Complex
TC1900010016.hg.1	inositol-3-phosphate synthase 1	ISYNA1	4.97	15.95	13.64	0.47	0.2	T	T	2.49e-05	0.0012	Multiple_Complex
TC0500007452.hg.1	mitogen-activated protein kinase kinase kinase 1, E3 ubiquitin protein ligase	MAP3K1	4.96	11.76	9.45	0.54	0.5	T	T	3.96e-05	0.0017	Multiple_Complex
TC2000007157.hg.1	core-binding factor, runt domain, alpha subunit 2; translocated to, 2	CBFA2T2	4.95	11.23	8.92	0.73	0.63	T	T	4.14e-05	0.0018	Multiple_Complex
TC0300013888.hg.1	TSC22 domain family, member 2	TSC22D2	4.94	14.07	11.77	0.36	0.04	T	T	6.59e-06	0.0004	Multiple_Complex
TC1900011885.hg.1	zinc finger protein 709	ZNF709	4.92	9.39	7.09	0.44	0.24	T	T	1.4e-08	2.55e-06	Multiple_Complex
TC1300007104.hg.1	leucine-rich repeats and calponin homology (CH) domain containing 1	LRCH1	4.92	10.98	8.68	0.33	0.4	T	T	3.16e-07	3.48e-05	Multiple_Complex
TC0400006938.hg.1	coiled-coil and C2 domain containing 2A	CC2D2A	4.9	9.49	7.2	0.12	0.25	T	T	7.93e-10	2.3e-07	Multiple_Complex
TC2200008676.hg.1	SRY box 10	SOX10	4.89	9.35	7.06	0.62	0.85	T	T	0.0009	0.0204	Multiple_Complex
TC2000006642.hg.1	bone morphogenetic protein 2	BMP2	4.88	8.5	6.22	1.55	0.16	T	T	0.0201	0.1748	Coding
TC0300012781.hg.1	WW domain containing transcription regulator 1	WWTR1	4.87	7.59	5.31	1.08	0.2	T	T	8.28e-06	0.0005	Multiple_Complex
TC0200010157.hg.1	integrin alpha 4	ITGA4	4.87	7.06	4.77	0.34	0.05	T	T	0.0006	0.0137	Multiple_Complex
TC0200007854.hg.1	Meis homeobox 1	MEIS1	4.85	6.95	4.68	0.14	0.85	T	F	2.82e-05	0.0013	Multiple_Complex
TC1200008081.hg.1	dual specificity tyrosine-(Y)-phosphorylation regulated kinase 2	DYRK2	4.85	10.05	7.77	0.31	0.58	T	T	8.19e-07	7.55e-05	Multiple_Complex
TC1700012231.hg.1	transmembrane protein 98	TMEM98	4.83	12.41	10.14	0.46	0.81	T	T	0.0004	0.0099	Multiple_Complex
TC2200009356.hg.1	ADP-ribosylation factor GTPase activating protein 3	ARFGAP3	4.83	11.98	9.71	0.43	0.91	T	T	9.96e-06	0.0006	Multiple_Complex
TC1300008668.hg.1	lipoma HMGIC fusion partner	LHFP	4.83	10.23	7.96	0.11	1.41	T	T	0.0028	0.046	Multiple_Complex
TC2000007830.hg.1	transcription factor AP-2 gamma (activating enhancer binding protein 2 gamma)	TFAP2C	4.81	9.98	7.72	0.12	0.5	T	T	0.0042	0.0604	Coding
TC2200009331.hg.1	RAS-like, family 10, member A	RASL10A	4.81	5.45	3.18	0.48	0.15	T	F	2.95e-08	4.78e-06	Multiple_Complex
TC1100009969.hg.1	amyloid beta (A4) precursor protein-binding, family B, member 1 (Fe65)	APBB1	4.8	8.45	6.19	0.69	0.39	T	T	1.3e-06	0.0001	Multiple_Complex
TC1200010926.hg.1	bromodomain adjacent to zinc finger domain 2A	BAZ2A	4.79	14.77	12.51	0.18	0.31	T	T	1.05e-07	1.4e-05	Multiple_Complex
TC1400007310.hg.1	KIAA0586	KIAA0586	4.78	13.09	10.83	0.61	0.4	T	T	1.55e-05	0.0008	Multiple_Complex
TC0500008125.hg.1	Rho-related BTB domain containing 3	RHOBTB3	4.77	8.94	6.69	0.42	0.74	T	T	0.0001	0.0044	Multiple_Complex
TC2200009234.hg.1	SPECC1L-ADORA2A readthrough (NMD candidate)	SPECC1L-ADORA2A	4.77	9.65	7.4	0.47	0.22	T	T	3.13e-05	0.0014	Multiple_Complex
TC1200008650.hg.1	achaete-scute family bHLH transcription factor 1	ASCL1	4.77	6.52	4.26	1.56	0.31	T	T	0.0007	0.0165	Multiple_Complex
TC0200009402.hg.1	mannosyl (alpha-1,6-)-glycoprotein beta-1,6-N-acetyl-glucosaminyltransferase	MGAT5	4.76	11.77	9.52	0.37	0.48	T	T	4.3e-07	4.44e-05	Multiple_Complex
TC0900010311.hg.1	family with sequence similarity 27, member E3	FAM27E3	4.75	7.92	5.67	0.81	0.32	T	T	4.42e-06	0.0003	Multiple_Complex
TC1200010569.hg.1	ankyrin repeat and SOCS box containing 8	ASB8	4.75	11.37	9.12	0.44	0.45	T	T	3.61e-07	3.86e-05	Multiple_Complex
TC1500010707.hg.1	Rho GTPase activating protein 11B	ARHGAP11B	4.74	12.72	10.48	0.49	0.68	T	T	1.88e-05	0.0009	Multiple_Complex
TC0100008055.hg.1	tyrosine kinase with immunoglobulin-like and EGF-like domains 1	TIE1	4.74	7.28	5.04	0.49	0.07	T	T	4.77e-08	7.2e-06	Multiple_Complex
TC0X00010532.hg.1	angiomotin; microRNA 4329	AMOT; MIR4329	4.73	9.21	6.96	0.73	0.46	T	T	0.0002	0.0051	Multiple_Complex
TC1400008583.hg.1	cyclin B1 interacting protein 1, E3 ubiquitin protein ligase; small nucleolar RNA, C/D box 126	CCNB1IP1; SNORD126	4.73	16.83	14.58	0.07	0.15	T	T	1.02e-09	2.84e-07	Multiple_Complex
TC0200011837.hg.1	family with sequence similarity 49, member A	FAM49A	4.73	11.09	8.85	0.75	0.4	T	T	0.0012	0.0237	Multiple_Complex
TC0300008336.hg.1	chromosome 3 open reading frame 52	C3orf52	4.73	9.81	7.57	0.66	0.48	T	T	0.0029	0.0461	Multiple_Complex
TC0700012898.hg.1	TRPM8 channel-associated factor 1	TCAF1	4.73	10.14	7.9	0.26	1.1	T	T	0.0002	0.0068	Multiple_Complex
TC1100012445.hg.1	beta-site APP-cleaving enzyme 1	BACE1	4.72	8.36	6.12	0.19	0.11	T	T	7.31e-09	1.48e-06	Multiple_Complex
TC1200011495.hg.1	lumican	LUM	4.72	6.64	4.4	0.98	0.18	T	F	0.0002	0.0051	Multiple_Complex
TC1000012579.hg.1	slit guidance ligand 1; ARHGAP19-SLIT1 readthrough (NMD candidate)	SLIT1; ARHGAP19-SLIT1	4.72	8.15	5.91	1.55	0.27	T	T	0.0002	0.0051	Multiple_Complex
TC2000008175.hg.1	prodynorphin	PDYN	4.7	6.78	4.55	0.7	0.49	T	F	2.48e-05	0.0012	Coding
TC1900010574.hg.1	zinc finger protein 571	ZNF571	4.7	10.4	8.17	0.89	0.73	T	T	0.0096	0.1071	Multiple_Complex
TC1700012460.hg.1	ATP binding cassette subfamily A member 5	ABCA5	4.68	7.58	5.36	0.6	0.25	T	T	3.71e-05	0.0016	Multiple_Complex
TC1100012526.hg.1	ubiquitin specific peptidase 2	USP2	4.68	10.56	8.33	0.34	0.35	T	T	1.73e-06	0.0001	Multiple_Complex
TC1500007529.hg.1	ubiquitin specific peptidase 3	USP3	4.67	13.38	11.15	0.31	0.3	T	T	1.39e-07	1.76e-05	Multiple_Complex
TC0500013323.hg.1	Salzman2013 ANNOTATED, INTERNAL, ncRNA, OVEXON best transcript TCONS_l2_00023773	TCONS_l2_00023773	4.66	10.59	8.37	0.71	0.63	T	T	6.48e-05	0.0026	Multiple_Complex
TC0700011151.hg.1	FK506 binding protein 9 pseudogene 1	FKBP9P1	4.66	9.28	7.06	0.55	0.53	T	T	8.38e-05	0.0031	Multiple_Complex
TC0700013527.hg.1	src kinase associated phosphoprotein 2	SKAP2	4.65	10.62	8.41	0.31	0.27	T	T	1.15e-05	0.0006	Multiple_Complex
TC2100007597.hg.1	heat shock protein 70kDa family, member 13	HSPA13	4.65	13.04	10.82	0.55	0.76	T	T	0.0014	0.0279	Multiple_Complex
TC2200007398.hg.1	synaptogyrin 1	SYNGR1	4.64	12.58	10.36	0.85	0.34	T	T	6.66e-05	0.0026	Multiple_Complex
TC1200009852.hg.1	pregnancy-zone protein	PZP	4.64	6.58	4.37	0.47	0.29	T	F	2.09e-05	0.001	Multiple_Complex
TC0900012212.hg.1	perilipin 2	PLIN2	4.63	12.44	10.23	0.38	0.47	T	T	5.4e-08	7.93e-06	Multiple_Complex
TC1500007644.hg.1	chromosome 15 open reading frame 61	C15orf61	4.63	7.17	4.96	0.37	0.22	T	F	5.39e-07	5.34e-05	Multiple_Complex
TC0600009322.hg.1	heat shock transcription factor 2	HSF2	4.62	13.41	11.2	0.74	0.38	T	T	2.74e-05	0.0013	Multiple_Complex
TC1900011132.hg.1	solute carrier family 6, member 16	SLC6A16	4.62	8.27	6.06	0.48	0.23	T	T	1.64e-05	0.0008	Multiple_Complex
TC0800007027.hg.1	solute carrier family 25 (mitochondrial iron transporter), member 37	SLC25A37	4.62	9.96	7.75	0.31	0.46	T	T	1.18e-05	0.0007	Multiple_Complex
TC0600011971.hg.1	patched domain containing 4	PTCHD4	4.6	6.43	4.23	0.75	0.07	T	T	0.0006	0.0137	Multiple_Complex
TC0500010924.hg.1	ADAM metallopeptidase with thrombospondin type 1 motif 6	ADAMTS6	4.58	7.64	5.45	0.15	0.25	T	F	3.25e-07	3.57e-05	Multiple_Complex
TC0700008351.hg.1	guanine nucleotide binding protein (G protein), gamma 11	GNG11	4.57	7.32	5.12	0.64	0.27	T	T	1.88e-05	0.0009	Multiple_Complex
TC2000008295.hg.1	glycerophosphocholine phosphodiesterase 1	GPCPD1	4.57	9.29	7.1	1.11	0.38	T	T	1.36e-05	0.0007	Multiple_Complex
TC0300011853.hg.1	SUMO1/sentrin specific peptidase 7	SENP7	4.57	9.74	7.55	0.87	0.93	T	T	0.0074	0.0895	Multiple_Complex
TC1200008678.hg.1	EP300 interacting inhibitor of differentiation 3	EID3	4.56	7.36	5.17	0.77	0.66	T	T	2.26e-05	0.0011	Coding
TC0300011203.hg.1	decapping mRNA 1A	DCP1A	4.56	9.87	7.68	0.41	0.2	T	T	1.63e-06	0.0001	Multiple_Complex
TC0800006983.hg.1	protein phosphatase 3, catalytic subunit, gamma isozyme	PPP3CC	4.56	9.97	7.78	0.39	0.21	T	T	1.44e-06	0.0001	Multiple_Complex
TC1700007319.hg.1	WD repeat and SOCS box containing 1	WSB1	4.54	14.82	12.64	0.21	2.08	T	T	0.0091	0.1033	Multiple_Complex
TC0800007114.hg.1	scavenger receptor class A, member 3	SCARA3	4.54	10.6	8.42	0.63	0.25	T	T	1.35e-05	0.0007	Multiple_Complex
TC1500010755.hg.1	ankyrin repeat and death domain containing 1A	ANKDD1A	4.52	7.92	5.74	1.06	0.25	T	T	0.0006	0.0137	Multiple_Complex
TC0700011626.hg.1	sema domain, immunoglobulin domain (Ig), short basic domain, secreted, (semaphorin) 3C	SEMA3C	4.52	8.26	6.08	1.34	0.61	T	T	0.0136	0.1351	Multiple_Complex
TC1000008397.hg.1	interferon-induced protein with tetratricopeptide repeats 3	IFIT3	4.51	6.82	4.64	1.12	0.35	T	T	0.0004	0.0112	Coding
TC1200008790.hg.1	ubiquitin specific peptidase 30	USP30	4.51	12.33	10.16	0.56	0.2	T	T	1.01e-06	8.88e-05	Multiple_Complex
TC1200011474.hg.1	ATPase, Ca++ transporting, plasma membrane 1	ATP2B1	4.51	11.39	9.21	0.88	0.69	T	T	0.0027	0.045	Multiple_Complex
TC1200011002.hg.1	leucine-rich repeats and immunoglobulin-like domains 3	LRIG3	4.51	10.6	8.43	1.02	0.23	T	T	6.15e-05	0.0025	Multiple_Complex
TC2200007526.hg.1	RNA, U12 small nuclear	RNU12	4.5	9.55	7.38	0.92	0.14	T	T	0.0008	0.018	Multiple_Complex
TC1400009524.hg.1	ZFP36 ring finger protein-like 1	ZFP36L1	4.48	15.47	13.31	0.36	0.03	T	T	1.6e-07	1.98e-05	Coding
TC0100011364.hg.1	SLIT-ROBO Rho GTPase activating protein 2	SRGAP2	4.48	13.58	11.42	0.2	0.21	T	T	2.06e-09	5.1e-07	Multiple_Complex
TC0200013531.hg.1	KAT8 regulatory NSL complex subunit 3	KANSL3	4.47	11.09	8.93	0.45	0.17	T	T	6.5e-06	0.0004	Multiple_Complex
TC0400007264.hg.1	Kruppel-like factor 3 (basic)	KLF3	4.47	13.87	11.71	0.75	0.12	T	T	2.9e-06	0.0002	Multiple_Complex
TC2200008576.hg.1	RNA binding protein, fox-1 homolog (C. elegans) 2	RBFOX2	4.47	14.62	12.46	0.06	0.32	T	T	3.6e-09	8.15e-07	Multiple_Complex
TC0300012323.hg.1	monoglyceride lipase	MGLL	4.46	6.93	4.78	0.57	0.3	T	F	9.96e-06	0.0006	Multiple_Complex
TC1500007333.hg.1	transcription factor 12	TCF12	4.46	15.6	13.44	0.88	0.49	T	T	0.0007	0.0156	Multiple_Complex
TC0100018355.hg.1	ras homolog family member U	RHOU	4.46	9.95	7.79	0.32	0.61	T	T	0.0012	0.0241	Multiple_Complex
TC0300007745.hg.1	ADP-ribosylation factor like GTPase 6 interacting protein 5	ARL6IP5	4.46	14.25	12.09	0.7	0.29	T	T	1.62e-07	2e-05	Multiple_Complex
TC1900011734.hg.1	melanoma inhibitory activity; RAB4B, member RAS oncogene family; MIA-RAB4B readthrough (NMD candidate)	MIA; RAB4B; MIA-RAB4B	4.46	7.22	5.06	1.2	0.12	T	T	9.49e-05	0.0034	Multiple_Complex
TC1700010254.hg.1	slingshot protein phosphatase 2	SSH2	4.46	12.23	10.07	0.31	0.86	T	T	1.1e-06	9.49e-05	Multiple_Complex
TC0900008811.hg.1	syntaxin binding protein 1	STXBP1	4.45	15.51	13.35	0.31	0.32	T	T	3.15e-06	0.0002	Multiple_Complex
TC1200012254.hg.1	vacuolar protein sorting 37 homolog B (S. cerevisiae)	VPS37B	4.45	8.78	6.62	0.53	0.67	T	T	4.42e-05	0.0019	Multiple_Complex
TC0100018478.hg.1	neuroblastoma breakpoint family, member 10	NBPF10	4.44	11.87	9.72	0.6	0.4	T	T	8.84e-06	0.0005	Multiple_Complex
TC1400007732.hg.1	vasohibin 1	VASH1	4.43	7.66	5.52	0.22	0.49	T	T	2.6e-05	0.0012	Multiple_Complex
TC0600014265.hg.1	chloride intracellular channel 1	CLIC1	4.42	16.01	13.87	0.07	0.25	T	T	1.71e-05	0.0009	Coding
TC1100010688.hg.1	PHD finger protein 21A	PHF21A	4.42	13.63	11.49	0.46	0.58	T	T	1.9e-06	0.0001	Multiple_Complex
TC0100018480.hg.1	neuroblastoma breakpoint family, member 14	NBPF14	4.4	12.11	9.97	0.6	0.2	T	T	1.23e-06	0.0001	Coding
TC0900012158.hg.1	PALM2-AKAP2 readthrough	PALM2-AKAP2	4.39	10.39	8.26	0.3	0.43	T	T	8e-05	0.003	Coding
TC0400008137.hg.1	coiled-coil serine rich protein 1	CCSER1	4.38	6.15	4.02	0.74	0.1	T	F	0.0001	0.0046	Multiple_Complex
TC0900008314.hg.1	fibronectin type III and SPRY domain containing 1-like	FSD1L	4.38	9.65	7.52	1.03	0.72	T	T	0.0019	0.0342	Multiple_Complex
TC0400008892.hg.1	hedgehog interacting protein	HHIP	4.37	7.26	5.13	0.75	0.1	T	F	0.0114	0.1209	Multiple_Complex
TC0300010515.hg.1	NFKB inhibitor interacting Ras-like 1	NKIRAS1	4.36	11.72	9.6	0.43	0.35	T	T	2.28e-07	2.66e-05	Multiple_Complex
TC1200010448.hg.1	glucoside xylosyltransferase 1	GXYLT1	4.36	10.84	8.72	0.87	0.84	T	T	0.0348	0.2444	Multiple_Complex
TC0100007789.hg.1	argonaute RISC catalytic component 3	AGO3	4.36	12.83	10.7	0.09	0.45	T	T	3.88e-05	0.0017	Multiple_Complex
TC0100009403.hg.1	chitinase 3-like 2	CHI3L2	4.35	6.68	4.55	0.52	0.17	T	F	2.04e-08	3.52e-06	Multiple_Complex
TC0200007806.hg.1	microRNA 4434	MIR4434	4.35	5.81	3.68	0.72	0.19	T	F	0.0001	0.0037	Multiple_Complex
TC2000006501.hg.1	signal-regulatory protein alpha	SIRPA	4.35	9	6.87	0.52	0.32	T	T	4.22e-06	0.0003	Coding
TC0X00008862.hg.1	FUN14 domain containing 2	FUNDC2	4.35	13.63	11.51	0.14	0.45	T	T	2.72e-07	3.08e-05	Multiple_Complex
TC1300009165.hg.1	protocadherin 9	PCDH9	4.34	5.85	3.73	0.59	0.29	T	F	5.78e-06	0.0004	Multiple_Complex
TC0900008776.hg.1	multivesicular body subunit 12B	MVB12B	4.33	11.63	9.52	0.76	0.25	T	T	0.0006	0.0148	Multiple_Complex
TC0300012918.hg.1	cyclin L1	CCNL1	4.33	14.72	12.61	0.65	0.36	T	T	1.22e-05	0.0007	Multiple_Complex
TC1000008054.hg.1	plasminogen activator, urokinase	PLAU	4.31	11.43	9.32	2.05	0.57	T	T	0.016	0.1509	Multiple_Complex
TC1100009453.hg.1	ST3 beta-galactoside alpha-2,3-sialyltransferase 4	ST3GAL4	4.28	9.93	7.83	0.19	0.2	T	T	1.67e-08	2.97e-06	Multiple_Complex
TC0X00006477.hg.1	CD99 molecule	CD99	4.27	13.56	11.46	0.68	0.19	T	T	0.0009	0.0197	Multiple_Complex
TC0800011680.hg.1	microRNA 548d-1	MIR548D1	4.27	7.98	5.88	0.13	1.03	T	T	0.005	0.0685	Multiple_Complex
TC0100018338.hg.1	neuron navigator 1	NAV1	4.27	12.89	10.79	0.26	0.35	T	T	2.18e-05	0.0011	Multiple_Complex
TC0800010685.hg.1	v-myb avian myeloblastosis viral oncogene homolog-like 1	MYBL1	4.27	8.87	6.78	0.52	0.63	T	T	3.39e-06	0.0002	Multiple_Complex
TC1200010713.hg.1	fidgetin-like 2	FIGNL2	4.26	6.71	4.62	0.32	0.53	T	T	1.85e-07	2.24e-05	Multiple_Complex
TC1700008342.hg.1	phosphatidylcholine transfer protein	PCTP	4.26	10.58	8.49	0.44	0.63	T	T	1.89e-06	0.0001	Multiple_Complex
TC0300013846.hg.1	glucoside xylosyltransferase 2	GXYLT2	4.25	10.27	8.18	0.29	0.42	T	T	3.11e-05	0.0014	Multiple_Complex
TC0100011253.hg.1	BTG family, member 2	BTG2	4.24	9.05	6.96	1.77	0.38	T	T	5.58e-05	0.0023	Multiple_Complex
TC0100007567.hg.1	RNA, U11 small nuclear	RNU11	4.24	9.69	7.61	0.86	0.34	T	T	3.16e-05	0.0014	Multiple_Complex
TC0100015258.hg.1	DNA-damage regulated autophagy modulator 2	DRAM2	4.23	14.49	12.41	0.24	0.08	T	T	3.93e-06	0.0003	Multiple_Complex
TC0200014414.hg.1	chemokine (C-X-C motif) receptor 4	CXCR4	4.23	8.43	6.35	0.11	0.42	T	T	0.0084	0.0976	Multiple_Complex
TC0100010522.hg.1	TOR signaling pathway regulator	TIPRL	4.22	12.45	10.37	0.51	0.29	T	T	5.81e-06	0.0004	Multiple_Complex
TC0100014846.hg.1	general transcription factor IIB	GTF2B	4.21	12.3	10.22	0.19	0.53	T	T	6.47e-07	6.22e-05	Multiple_Complex
TC0100013229.hg.1	heparan sulfate proteoglycan 2	HSPG2	4.21	10.92	8.85	0.69	0.49	T	T	3.34e-06	0.0002	Multiple_Complex
TC0X00010459.hg.1	MORC family CW-type zinc finger 4	MORC4	4.2	8.93	6.86	0.82	0.39	T	T	4.88e-06	0.0003	Multiple_Complex
TC1200007690.hg.1	tensin 2	TNS2	4.16	5.96	3.91	0.1	0.51	T	F	2.24e-05	0.0011	Multiple_Complex
TC0400011565.hg.1	collagen, type XXV, alpha 1	COL25A1	4.15	7.74	5.69	1.11	0.4	T	T	0.0011	0.0235	Multiple_Complex
TC1000011323.hg.1	glutamate dehydrogenase 1	GLUD1	4.15	15.83	13.78	0.43	0.27	T	T	3.4e-09	7.75e-07	Multiple_Complex
TC0100017118.hg.1	YOD1 deubiquitinase	YOD1	4.14	9.99	7.94	0.96	0.64	T	T	0.0025	0.0416	Multiple_Complex
TC1000008495.hg.1	phospholipase C, epsilon 1	PLCE1	4.14	6.12	4.07	1.08	0.52	T	F	0.0076	0.0912	Multiple_Complex
TC1100008024.hg.1	metastasis associated lung adenocarcinoma transcript 1 (non-protein coding)	MALAT1	4.14	18.15	16.1	0.39	0.77	T	T	8.25e-06	0.0005	Multiple_Complex
TC0500013020.hg.1	CDC like kinase 4	CLK4	4.13	10.53	8.49	0.5	1.35	T	T	0.0173	0.1587	Multiple_Complex
TC1800006589.hg.1	protein tyrosine phosphatase, receptor type, M	PTPRM	4.13	10.89	8.85	0.5	0.81	T	T	0.0002	0.0069	Multiple_Complex
TC0100017216.hg.1	NIMA-related kinase 2	NEK2	4.13	12.2	10.15	1.04	0.51	T	T	0.0042	0.0611	Multiple_Complex
TC1200008739.hg.1	transmembrane protein 263	TMEM263	4.12	10.14	8.09	0.53	0.43	T	T	1.76e-06	0.0001	Multiple_Complex
TC1700006717.hg.1	arachidonate 12-lipoxygenase	ALOX12	4.12	6.9	4.86	1.16	0.26	T	T	4.23e-05	0.0018	Multiple_Complex
TC1500009089.hg.1	phospholipase C, beta 2	PLCB2	4.12	9.06	7.02	0.79	0.62	T	T	2.72e-05	0.0013	Multiple_Complex
TC0500010615.hg.1	selenoprotein P, plasma, 1	SEPP1	4.12	8.69	6.65	0.25	0.8	T	T	0.0054	0.072	Multiple_Complex
TC0200008534.hg.1	ankyrin repeat domain 36	ANKRD36	4.11	11.16	9.12	0.67	0.76	T	T	0.0118	0.1231	Multiple_Complex
TC0200010263.hg.1	inositol polyphosphate-1-phosphatase	INPP1	4.1	6.37	4.34	0.55	0.21	T	T	3.2e-06	0.0002	Multiple_Complex
TC1900011976.hg.1	zinc finger protein 285	ZNF285	4.1	7.73	5.69	1.17	0.36	T	T	0.0449	0.2826	Multiple_Complex
TC0900007333.hg.1	family with sequence similarity 27, member E3	FAM27E3	4.09	8.4	6.37	0.54	0.42	T	T	2.78e-06	0.0002	Multiple_Complex
TC0300008182.hg.1	centrosomal protein 97kDa	CEP97	4.09	10.62	8.59	1.12	0.65	T	T	0.0008	0.0173	Multiple_Complex
TC1000011964.hg.1	RAB11 family interacting protein 2 (class I)	RAB11FIP2	4.08	11.96	9.93	0.85	0.13	T	T	0.0025	0.0419	Multiple_Complex
TC0100010281.hg.1	ATPase, Na+/K+ transporting, alpha 2 polypeptide	ATP1A2	4.07	11.5	9.47	0.68	0.6	T	T	0.0025	0.0414	Multiple_Complex
TC0100015680.hg.1	neuroblastoma breakpoint family, member 9	NBPF9	4.07	10.4	8.37	0.42	0.66	T	T	6.49e-05	0.0026	Multiple_Complex
TC0300014031.hg.1	coiled-coil domain containing 80; long intergenic non-protein coding RNA 1279	CCDC80; LINC01279	4.07	8.66	6.63	1.33	0.87	T	T	0.0008	0.0172	Multiple_Complex
TC0900008474.hg.1	sorting nexin family member 30	SNX30	4.07	10.24	8.22	0.4	0.22	T	T	9.61e-07	8.56e-05	Multiple_Complex
TC1400010737.hg.1	kelch-like family member 28	KLHL28	4.07	9.99	7.97	0.73	0.7	T	T	0.0008	0.0175	Multiple_Complex
TC0200013541.hg.1	sema domain, immunoglobulin domain (Ig), transmembrane domain (TM) and short cytoplasmic domain, (semaphorin) 4C	SEMA4C	4.07	9.55	7.53	0.36	0.05	T	T	1.41e-06	0.0001	Multiple_Complex
TC1200012836.hg.1	chromosome 12 open reading frame 73	C12orf73	4.06	9.39	7.37	0.21	0.28	T	T	7.51e-07	7.02e-05	Multiple_Complex
TC0800010695.hg.1	small nucleolar RNA, C/D box 87; small nucleolar RNA host gene 6	SNORD87; SNHG6	4.05	15	12.98	0.04	0.32	T	T	4.17e-08	6.45e-06	Multiple_Complex
TC1900010997.hg.1	dishevelled-binding antagonist of beta-catenin 3	DACT3	4.05	7.01	4.99	0.36	0.03	T	T	5.78e-08	8.41e-06	Multiple_Complex
TC0600012554.hg.1	BTB and CNC homology 1, basic leucine zipper transcription factor 2	BACH2	4.05	7.24	5.22	0.17	0.27	T	T	1.2e-06	0.0001	Multiple_Complex
TC0200009331.hg.1	POTE ankyrin domain family, member E	POTEE	4.04	11.37	9.35	0.44	0.36	T	T	3.97e-07	4.16e-05	Coding
TC0100015651.hg.1	microRNA 5087	MIR5087	4.04	9.73	7.71	1.15	0.37	T	T	0.006	0.0772	Multiple_Complex
TC0100015717.hg.1	OTU deubiquitinase 7B	OTUD7B	4.04	8.31	6.29	0.28	0.87	T	T	0.0004	0.0104	Multiple_Complex
TC0300013090.hg.1	polyhomeotic homolog 3 (Drosophila)	PHC3	4.04	13.67	11.66	0.4	0.65	T	T	0.0008	0.0185	Multiple_Complex
TC1000010536.hg.1	glutamate dehydrogenase 1 pseudogene 7	GLUD1P7	4.03	13.06	11.05	0.47	0.25	T	T	6.68e-07	6.38e-05	Multiple_Complex
TC1000011989.hg.1	small nucleolar RNA, H/ACA box 19	SNORA19	4.02	9.5	7.49	0.7	0.36	T	T	4.19e-05	0.0018	Multiple_Complex
TC0300012665.hg.1	5-3 exoribonuclease 1	XRN1	4.02	10.1	8.09	0.81	0.58	T	T	0.0058	0.0757	Multiple_Complex
TC0100009938.hg.1	myeloid/lymphoid or mixed-lineage leukemia; translocated to, 11	MLLT11	4.02	15.56	13.55	0.18	0.18	T	T	4.62e-08	7e-06	Multiple_Complex
TC0900011300.hg.1	tumor necrosis factor (ligand) superfamily, member 15	TNFSF15	4.01	6.73	4.73	1.3	0.21	T	T	0.0008	0.0176	Coding
TC0500006808.hg.1	GALI1870 [Source:UniProtKB/TrEMBL;Acc:Q6UWR0]	AC016549.1	4.01	8.46	6.46	0.13	0.56	T	T	1.68e-05	0.0009	Coding
TC0200009191.hg.1		AC013474.4	4	8.38	6.38	0.68	0.13	T	T	6.08e-05	0.0024	Multiple_Complex
TC0100007532.hg.1	syntaxin 12	STX12	4	10.59	8.59	0.31	0.38	T	T	1.29e-05	0.0007	Multiple_Complex
TC2000009128.hg.1	zinc fingers and homeoboxes 3	ZHX3	4	8.13	6.13	0.29	0.12	T	T	1.8e-08	3.16e-06	Multiple_Complex
TC0400006718.hg.1	sortilin-related VPS10 domain containing receptor 2	SORCS2	4	7.94	5.94	0.31	0.12	T	T	3.84e-06	0.0003	Multiple_Complex
TC0100007705.hg.1	antizyme inhibitor 2	AZIN2	4	6.57	4.57	0.47	0.28	T	T	1.97e-06	0.0002	Multiple_Complex
TC0100010416.hg.1	pre-B-cell leukemia homeobox 1	PBX1	3.99	14.4	12.4	0.11	0.26	T	T	4.04e-06	0.0003	Multiple_Complex
TC0700008465.hg.1	neuronal pentraxin II	NPTX2	3.99	8.51	6.51	0.55	0.52	T	T	0.0033	0.0513	Multiple_Complex
TC2000009932.hg.1	small nucleolar RNA, C/D box 12C; small nucleolar RNA, C/D box 12; ZNFX1 antisense RNA 1; small nucleolar RNA, C/D box 12B	SNORD12C; SNORD12; ZFAS1; SNORD12B	3.99	15.58	13.59	0.1	0.12	T	T	6.24e-08	8.97e-06	Multiple_Complex
TC0100015580.hg.1	neuroblastoma breakpoint family, member 20	NBPF20	3.99	11.2	9.2	0.64	0.45	T	T	4.84e-06	0.0003	Coding
TC1000012603.hg.1	family with sequence similarity 53, member B	FAM53B	3.99	10.44	8.44	0.24	0.09	T	T	1.01e-06	8.89e-05	Multiple_Complex
TC0800010275.hg.1	plasminogen activator, tissue	PLAT	3.99	8.63	6.64	0.94	0.15	T	T	4.25e-05	0.0018	Multiple_Complex
TC0100018308.hg.1	Fc fragment of IgG, low affinity IIa, receptor (CD32)	FCGR2A	3.98	8.12	6.12	0.57	0.49	T	T	0.0009	0.0189	Multiple_Complex
TC0900011676.hg.1	immediate early response 5-like	IER5L	3.97	5.79	3.8	0.99	0.26	T	F	1.32e-06	0.0001	Coding
TC0X00007557.hg.1	mediator complex subunit 12	MED12	3.97	12.85	10.86	0.15	0.19	T	T	3.67e-07	3.91e-05	Multiple_Complex
TC0800011826.hg.1	ArfGAP with SH3 domain, ankyrin repeat and PH domain 1; ASAP1 intronic transcript 2	ASAP1; ASAP1-IT2	3.97	13.79	11.81	0.12	0.36	T	T	1.05e-06	9.2e-05	Multiple_Complex
TC0900009882.hg.1	DDB1 and CUL4 associated factor 12	DCAF12	3.97	12.76	10.77	0.3	0.48	T	T	1.64e-07	2.01e-05	Multiple_Complex
TC0200011683.hg.1	eukaryotic translation initiation factor 1 pseudogene 7 [Source:HGNC Symbol;Acc:HGNC:49620]	EIF1P7	3.95	12.52	10.54	0.49	0.4	T	T	0.0001	0.0047	Multiple_Complex
TC1100011552.hg.1	ClpB homolog, mitochondrial AAA ATPase chaperonin	CLPB	3.95	11.75	9.77	0.18	0.11	T	T	2.87e-06	0.0002	Multiple_Complex
TC0300012118.hg.1	transmembrane protein 39A	TMEM39A	3.94	14.16	12.18	0.11	0.8	T	T	5.53e-06	0.0004	Multiple_Complex
TC0100006773.hg.1	splA/ryanodine receptor domain and SOCS box containing 1	SPSB1	3.93	9.38	7.41	1.09	0.75	T	T	2.51e-06	0.0002	Multiple_Complex
TC0300011386.hg.1	prickle homolog 2	PRICKLE2	3.93	7.74	5.76	0.23	0.1	T	T	3.08e-08	4.97e-06	Multiple_Complex
TC0100009658.hg.1	SLIT-ROBO Rho GTPase activating protein 2C	SRGAP2C	3.93	14.29	12.31	0.18	0.17	T	T	4.67e-07	4.76e-05	Multiple_Complex
TC1000007976.hg.1	carbohydrate (chondroitin 6) sulfotransferase 3	CHST3	3.93	6.67	4.7	0.08	0.27	T	T	5.86e-07	5.72e-05	Multiple_Complex
TC0200010636.hg.1	microtubule associated protein 2	MAP2	3.93	10.69	8.72	1.14	0.35	T	T	0.0017	0.0311	Multiple_Complex
TC0200010907.hg.1	acyl-CoA synthetase long-chain family member 3	ACSL3	3.92	15.2	13.23	0.74	0.5	T	T	0.0011	0.0223	Multiple_Complex
TC0100009339.hg.1	transmembrane protein 167B	TMEM167B	3.92	11.84	9.87	0.37	0.58	T	T	3e-06	0.0002	Multiple_Complex
TC1500010727.hg.1	cyclin D-type binding-protein 1	CCNDBP1	3.91	11.15	9.18	0.39	0.97	T	T	2.79e-06	0.0002	Multiple_Complex
TC0200011219.hg.1	atypical chemokine receptor 3	ACKR3	3.91	6.76	4.79	1.54	0.22	T	T	0.0151	0.1449	Multiple_Complex
TC0500008891.hg.1	protocadherin gamma subfamily B, 8 pseudogene	PCDHGB8P	3.9	7.54	5.58	0.15	0.16	T	T	4.21e-07	4.36e-05	Multiple_Complex
TC0400006951.hg.1	CD38 molecule	CD38	3.9	6.15	4.18	0.34	0.01	T	F	4.41e-08	6.77e-06	Multiple_Complex
TC0600007635.hg.1	palmitoyl-protein thioesterase 2; EGF-like-domain, multiple 8; PPT2-EGFL8 readthrough (NMD candidate)	PPT2; EGFL8; PPT2-EGFL8	3.89	12.61	10.65	0.29	0.21	T	T	5.67e-08	8.28e-06	Multiple_Complex
TC0500010788.hg.1	interleukin 6 signal transducer	IL6ST	3.89	10.08	8.12	0.25	0.41	T	T	9.26e-05	0.0034	Multiple_Complex
TC1500007188.hg.1		CTD-2647E9.1	3.88	10.49	8.53	1.04	0.54	T	T	7.74e-05	0.0029	Multiple_Complex
TC0300013874.hg.1	signal recognition particle receptor, B subunit	SRPRB	3.88	12.76	10.81	0.07	0.38	T	T	1.38e-05	0.0007	Multiple_Complex
TC0700008072.hg.1	rhomboid domain containing 2	RHBDD2	3.87	8.71	6.76	0.82	0.62	T	T	0.0008	0.0171	Multiple_Complex
TC0300010033.hg.1	p21 protein (Cdc42/Rac)-activated kinase 2	PAK2	3.86	13.58	11.63	0.2	0.27	T	T	5.95e-07	5.79e-05	Multiple_Complex
TC1700007478.hg.1	neurofibromin 1	NF1	3.86	12.92	10.97	0.59	0.31	T	T	2.99e-07	3.34e-05	Multiple_Complex
TC1400009778.hg.1	transmembrane p24 trafficking protein family member 8	TMED8	3.85	11.68	9.74	0.47	0.51	T	T	1.69e-06	0.0001	Multiple_Complex
TC0100013028.hg.1	EPH receptor A2	EPHA2	3.85	8.96	7.02	1.24	0.1	T	T	0.0011	0.0233	Multiple_Complex
TC0400011298.hg.1	nucleosome assembly protein 1-like 5	NAP1L5	3.85	5.78	3.83	0.3	0.81	T	T	0.0003	0.0093	Coding
TC0700012041.hg.1	procollagen-lysine, 2-oxoglutarate 5-dioxygenase 3	PLOD3	3.84	8.93	6.99	0.31	0.23	T	T	2.24e-06	0.0002	Multiple_Complex
TC0500007258.hg.1	growth hormone receptor	GHR	3.83	7.37	5.43	0.6	0.36	T	T	1.89e-06	0.0001	Multiple_Complex
TC1300010037.hg.1	KIAA0226-like	KIAA0226L	3.83	7.22	5.29	0.33	0.88	T	T	4.66e-05	0.002	Multiple_Complex
TC1100012037.hg.1	mastermind-like transcriptional coactivator 2	MAML2	3.82	10.4	8.46	0.71	0.2	T	T	0.0143	0.1397	Multiple_Complex
TC1000008502.hg.1	TBC1 domain family, member 12	TBC1D12	3.82	7.66	5.72	0.42	0.35	T	T	2.36e-05	0.0011	Multiple_Complex
TC0600013123.hg.1		RP11-325O24.1	3.81	10.35	8.42	0.84	0.69	T	T	0.0039	0.0582	Multiple_Complex
TC0400008972.hg.1	doublecortin-like kinase 2	DCLK2	3.81	8.35	6.42	0.84	0.14	T	T	0.0009	0.0205	Multiple_Complex
TC1400006686.hg.1	CKLF-like MARVEL transmembrane domain containing 5	CMTM5	3.81	6.09	4.16	0.68	0.05	T	F	0.0007	0.017	Multiple_Complex
TC0100007954.hg.1	small ArfGAP2	SMAP2	3.81	10.43	8.5	0.6	0.63	T	T	2.36e-05	0.0011	Multiple_Complex
TC1200010475.hg.1	ADAM metallopeptidase with thrombospondin type 1 motif 20	ADAMTS20	3.8	8.13	6.21	0.82	1.07	T	T	0.0158	0.1497	Multiple_Complex
TC1100013093.hg.1	beta-carotene oxygenase 2; ribosomal protein S12 pseudogene 21	BCO2; RPS12P21	3.8	6.06	4.13	0.5	0.26	T	T	3.36e-06	0.0002	Multiple_Complex
TC0900009870.hg.1	phosphatase and tensin homolog pseudogene 1 (functional)	PTENP1	3.79	10.54	8.62	0.43	0.32	T	T	3.99e-06	0.0003	Multiple_Complex
TC0X00006669.hg.1	glycine receptor alpha 2	GLRA2	3.79	6.39	4.47	0.19	0.36	T	F	0.0005	0.0121	Coding
TC1700011430.hg.1	CD79b molecule, immunoglobulin-associated beta	CD79B	3.78	8.65	6.73	0.58	0.36	T	T	0.0002	0.0071	Multiple_Complex
TC1000011168.hg.1	zinc finger, CCHC domain containing 24	ZCCHC24	3.78	7.44	5.52	0.61	0.42	T	T	1.49e-05	0.0008	Coding
TC0600012495.hg.1	glycoprotein hormones, alpha polypeptide	CGA	3.78	6.34	4.42	3.25	0.98	T	T	0.0185	0.1658	Multiple_Complex
TC0200015402.hg.1	family with sequence similarity 126, member B	FAM126B	3.78	9.27	7.35	0.58	0.64	T	T	8.08e-06	0.0005	Multiple_Complex
TC1200006469.hg.1	wingless-type MMTV integration site family, member 5B	WNT5B	3.77	6.88	4.97	0.78	0.58	T	T	0.0026	0.0431	Multiple_Complex
TC1200008574.hg.1	apoptotic peptidase activating factor 1	APAF1	3.77	11.62	9.71	0.31	0.65	T	T	4.33e-06	0.0003	Multiple_Complex
TC2000009357.hg.1	phosphatidylinositol-3,4,5-trisphosphate-dependent Rac exchange factor 1	PREX1	3.77	9.48	7.57	0.79	0.22	T	T	0.0042	0.0607	Multiple_Complex
TC1800006448.hg.1	thymidylate synthetase	TYMS	3.76	15.27	13.35	0.07	0.42	T	T	1.03e-06	8.98e-05	Multiple_Complex
TC1700006877.hg.1	ADP-ribose/CDP-alcohol diphosphatase, manganese-dependent	ADPRM	3.76	9.5	7.59	0.54	0.23	T	T	7.4e-05	0.0028	Multiple_Complex
TC0400008183.hg.1	bone morphogenetic protein receptor type IB	BMPR1B	3.75	7.76	5.85	0.25	0.26	T	T	6.72e-07	6.41e-05	Multiple_Complex
TC1100007785.hg.1	transmembrane protein 109	TMEM109	3.75	12.93	11.02	0.41	0.74	T	T	0.0001	0.004	Multiple_Complex
TC1600010181.hg.1	neuropilin (NRP) and tolloid (TLL)-like 2	NETO2	3.75	13.44	11.54	0.31	0.19	T	T	2.04e-06	0.0002	Multiple_Complex
TC0900007167.hg.1	DDB1 and CUL4 associated factor 10	DCAF10	3.75	11.5	9.6	0.4	0.36	T	T	1.6e-06	0.0001	Multiple_Complex
TC1200012653.hg.1	methyltransferase like 21B	METTL21B	3.74	9.48	7.58	0.32	0.39	T	T	4.68e-07	4.77e-05	Multiple_Complex
TC2000007386.hg.1	phospholipase C, gamma 1; ribosomal protein L23a pseudogene 81	PLCG1; RPL23AP81	3.74	12.38	10.48	0.09	0.26	T	T	3.31e-06	0.0002	Multiple_Complex
TC1400007038.hg.1	small nucleolar RNA, C/D box 127	SNORD127	3.73	7.09	5.19	0.28	0.29	T	F	2.33e-05	0.0011	Multiple_Complex
TC0300012238.hg.1	heart development protein with EGF-like domains 1	HEG1	3.73	7.79	5.89	0.44	0.15	T	T	1.74e-05	0.0009	Multiple_Complex
TC0700007948.hg.1	Shwachman-Bodian-Diamond syndrome pseudogene 1	SBDSP1	3.73	11.98	10.09	0.31	0.76	T	T	1.27e-06	0.0001	Multiple_Complex
TC0900011829.hg.1	ral guanine nucleotide dissociation stimulator	RALGDS	3.73	9.22	7.32	0.32	0.03	T	T	3.87e-07	4.08e-05	Multiple_Complex
TC0100014958.hg.1	breast cancer anti-estrogen resistance 3	BCAR3	3.72	7.66	5.76	0.38	0.44	T	T	1.48e-05	0.0008	Multiple_Complex
TC0200015314.hg.1	serine/threonine kinase 17b	STK17B	3.72	10.4	8.5	0.72	0.43	T	T	0.0002	0.0069	Multiple_Complex
TC0Y00006476.hg.1	Homo sapiens CD99 molecule (CD99), transcript variant 2, mRNA.; Homo sapiens CD99 molecule (CD99), transcript variant 3, mRNA.; Homo sapiens CD99 molecule (CD99), transcript variant 1, mRNA.; CD99 molecule [Source:HGNC Symbol;Acc:HGNC:7082]; Homo sapiens CD99 molecule, mRNA (cDNA clone MGC:2282 IMAGE:3161673), complete cds.; Homo sapiens CD99 molecule, mRNA (cDNA clone MGC:3938 IMAGE:2906143), co…	CD99	3.72	13.19	11.29	0.65	0.16	T	T	0.0015	0.0284	Multiple_Complex
TC1800006571.hg.1	Rho GTPase activating protein 28	ARHGAP28	3.71	9.99	8.1	0.6	0.31	T	T	0.0003	0.0081	Multiple_Complex
TC0500011225.hg.1	lipoma HMGIC fusion partner-like 2	LHFPL2	3.7	12.11	10.22	0.88	0.48	T	T	0.0009	0.0192	Multiple_Complex
TC0300012384.hg.1	H1 histone family, member X	H1FX	3.7	8.43	6.54	0.44	0.78	T	T	0.0004	0.0099	Multiple_Complex
TC1400010100.hg.1	autophagy related 2B	ATG2B	3.7	9.98	8.09	1.16	0.18	T	T	0.011	0.118	Multiple_Complex
TC1200010702.hg.1	small cell adhesion glycoprotein	SMAGP	3.7	9.47	7.58	1.61	0.97	T	T	0.0036	0.0545	Multiple_Complex
TC1400008919.hg.1	cofilin 2 (muscle)	CFL2	3.7	12.15	10.27	0.39	0.32	T	T	1.2e-05	0.0007	Multiple_Complex
TC0200015876.hg.1	serpin peptidase inhibitor, clade E (nexin, plasminogen activator inhibitor type 1), member 2	SERPINE2	3.69	14.8	12.92	1.3	0.64	T	T	0.0028	0.0457	Multiple_Complex
TC1300007757.hg.1	MT-CYB pseudogene 3 [Source:HGNC Symbol;Acc:HGNC:39579]	MTCYBP3	3.69	7.86	5.98	0.48	0.12	T	T	0.0054	0.0717	Multiple_Complex
TC1200009192.hg.1	B-cell CLL/lymphoma 7A	BCL7A	3.68	9.66	7.78	0.09	0.38	T	T	2.94e-07	3.29e-05	Multiple_Complex
TC0500010842.hg.1	phosphodiesterase 4D, cAMP-specific	PDE4D	3.68	7.07	5.19	0.72	0.55	T	T	0.0012	0.025	Multiple_Complex
TC0100015572.hg.1	SLIT-ROBO Rho GTPase activating protein 2B	SRGAP2B	3.67	13.53	11.65	0.15	0.26	T	T	6.18e-07	5.99e-05	Multiple_Complex
TC1400006659.hg.1	matrix metallopeptidase 14 (membrane-inserted)	MMP14	3.67	9.1	7.22	0.11	0.47	T	T	1.68e-06	0.0001	Multiple_Complex
TC0700012728.hg.1	pleiotrophin	PTN	3.67	12.23	10.36	0.5	0.5	T	T	9.37e-05	0.0034	Multiple_Complex
TC0400011283.hg.1	protein phosphatase, Mg2+/Mn2+ dependent, 1K	PPM1K	3.67	9.87	8	0.75	0.17	T	T	2.72e-05	0.0013	Multiple_Complex
TC1700008539.hg.1	mannose receptor, C type 2	MRC2	3.67	8.84	6.96	0.21	0.12	T	T	0.0009	0.0203	Multiple_Complex
TC0X00010675.hg.1	cullin 4B	CUL4B	3.65	14.17	12.3	0.46	0.61	T	T	0.0009	0.019	Multiple_Complex
TC0300009866.hg.1	coiled-coil domain containing 50	CCDC50	3.65	13	11.14	0.2	0.58	T	T	9.93e-08	1.34e-05	Multiple_Complex
TC1200009072.hg.1		AC026366.1	3.65	12.99	11.13	0.65	0.1	T	T	0.0001	0.0045	Multiple_Complex
TC2000009973.hg.1	zinc finger protein 343	ZNF343	3.65	8.18	6.32	0.33	0.59	T	T	4.37e-06	0.0003	Multiple_Complex
TC0900012167.hg.1	gelsolin	GSN	3.64	11.65	9.79	0.91	0.21	T	T	1.05e-05	0.0006	Multiple_Complex
TC0300011757.hg.1	protein S (alpha)	PROS1	3.63	6.67	4.8	0.55	0.42	T	T	1.05e-05	0.0006	Multiple_Complex
TC0900012126.hg.1	ankyrin repeat domain 20 family, member A3; ankyrin repeat domain 20 family, member A2	ANKRD20A3; ANKRD20A2	3.63	5.66	3.79	0.89	0.47	T	F	0.0006	0.0138	Multiple_Complex
TC2000007695.hg.1	protein tyrosine phosphatase, non-receptor type 1	PTPN1	3.63	13.53	11.68	0.34	0.42	T	T	4.06e-07	4.24e-05	Multiple_Complex
TC0200011287.hg.1	ankyrin repeat and SOCS box containing 1	ASB1	3.62	9.53	7.67	0.34	1.11	T	T	1.05e-05	0.0006	Multiple_Complex
TC0900011713.hg.1	formin binding protein 1	FNBP1	3.62	12.59	10.74	0.21	0.56	T	T	6.95e-07	6.62e-05	Multiple_Complex
TC1000009090.hg.1	BCL2-associated athanogene 3	BAG3	3.62	11.16	9.31	1.2	0.47	T	T	2.4e-05	0.0012	Coding
TC0800010002.hg.1	dual specificity phosphatase 4	DUSP4	3.62	9.17	7.31	1.56	0.22	T	T	0.002	0.0351	Multiple_Complex
TC1100011282.hg.1	CD248 molecule, endosialin	CD248	3.61	9.38	7.53	0.26	0.3	T	T	4.65e-06	0.0003	Coding
TC1000009516.hg.1	disco-interacting protein 2 homolog C	DIP2C	3.61	9.72	7.86	0.24	0.43	T	T	3.3e-07	3.61e-05	Multiple_Complex
TC1400008295.hg.1	microRNA 487a	MIR487A	3.6	4.92	3.08	0.36	0.39	T	F	0.0007	0.0154	Multiple_Complex
TC0200014269.hg.1	POTE ankyrin domain family, member I	POTEI	3.6	10.31	8.46	0.25	0.46	T	T	1.38e-05	0.0007	Multiple_Complex
TC1200007989.hg.1	transmembrane protein 5	TMEM5	3.58	10.06	8.22	1.86	0.35	T	T	0.0002	0.007	Multiple_Complex
TC2000008852.hg.1	nucleolar protein 4-like	NOL4L	3.58	12.12	10.28	0.96	0.43	T	T	0.0006	0.0153	Multiple_Complex
TC0300009282.hg.1	TCDD-inducible poly(ADP-ribose) polymerase	TIPARP	3.58	9.59	7.75	0.47	0.5	T	T	0.0002	0.0065	Multiple_Complex
TC1000007913.hg.1	H2A histone family, member Y2	H2AFY2	3.58	15.15	13.31	0.56	0.37	T	T	1.91e-05	0.001	Coding
TC0100018242.hg.1	heparan sulfate 2-O-sulfotransferase 1	HS2ST1	3.57	12.12	10.28	0.96	0.67	T	T	0.018	0.163	Coding
TC0500013248.hg.1	protocadherin beta 15	PCDHB15	3.57	9.27	7.43	0.35	0.25	T	T	3.24e-06	0.0002	Coding
TC1700012371.hg.1	zinc finger protein 286B; forkhead box O3B pseudogene	ZNF286B; FOXO3B	3.57	11.9	10.06	0.12	0.36	T	T	1.31e-06	0.0001	Multiple_Complex
TC1200012571.hg.1	integrin alpha FG-GAP repeat containing 2	ITFG2	3.57	11.71	9.88	0.38	0.82	T	T	0.0002	0.0071	Multiple_Complex
TC0200006687.hg.1	hippocalcin-like 1	HPCAL1	3.57	7.65	5.82	0.72	0.21	T	T	1.15e-05	0.0006	Multiple_Complex
TC0200010275.hg.1	glutaminase	GLS	3.56	12.73	10.9	0.94	0.51	T	T	0.0045	0.064	Multiple_Complex
TC1700006720.hg.1	B-cell CLL/lymphoma 6, member B	BCL6B	3.56	8.39	6.56	0.32	0.21	T	T	5.76e-07	5.64e-05	Multiple_Complex
TC1200009202.hg.1	ribosomal protein L21 pseudogene 1 [Source:HGNC Symbol;Acc:HGNC:10314]	RPL21P1	3.55	13.69	11.86	0.2	0.54	T	T	3.22e-05	0.0015	Multiple_Complex
TC0600011631.hg.1	TEA domain family member 3	TEAD3	3.55	9.91	8.08	0.2	0.32	T	T	3.16e-06	0.0002	Multiple_Complex
TC0X00008450.hg.1	Small nucleolar RNA SNORA8 [Source:RFAM;Acc:RF00393]	Z77249.1; SNORA8	3.55	8.81	6.98	0.25	0.32	T	T	4.14e-06	0.0003	Multiple_Complex
TC1200007615.hg.1	disco-interacting protein 2 homolog B	DIP2B	3.54	15.28	13.45	0.09	0.22	T	T	1.12e-08	2.1e-06	Multiple_Complex
TC1000010230.hg.1		GLUDP5	3.54	16.2	14.38	0.51	0.17	T	T	2.58e-07	2.94e-05	Multiple_Complex
TC0900006708.hg.1	small nuclear RNA activating complex polypeptide 3	SNAPC3	3.54	13.52	11.7	0.11	0.29	T	T	4.86e-07	4.92e-05	Multiple_Complex
TC1100007453.hg.1	midkine (neurite growth-promoting factor 2)	MDK	3.54	16.78	14.96	0.32	0.46	T	T	1.09e-06	9.43e-05	Multiple_Complex
TC0X00008298.hg.1	glutamate dehydrogenase 2	GLUD2	3.54	10.01	8.19	0.46	0.19	T	T	2.51e-07	2.88e-05	Multiple_Complex
TC0600008955.hg.1	lin-28 homolog B (C. elegans)	LIN28B	3.53	12.01	10.19	0.78	0.7	T	T	0.0017	0.0322	Multiple_Complex
TC1000012427.hg.1	aldo-keto reductase family 1, member C1	AKR1C1	3.53	7.38	5.56	0.88	0.33	T	T	0.0018	0.0335	Multiple_Complex
TC0900010886.hg.1	patched 1	PTCH1	3.53	11.8	9.98	0.66	0.19	T	T	6.53e-05	0.0026	Multiple_Complex
TC0700008367.hg.1	paternally expressed 10	PEG10	3.53	10.43	8.61	0.65	0.69	T	T	0.0003	0.0081	Multiple_Complex
TC1200012155.hg.1	RNA, U4 small nuclear 2	RNU4-2	3.53	13.36	11.54	0.16	0.95	T	T	0.0325	0.2341	Multiple_Complex
TC0700013615.hg.1	zinc finger protein 800	ZNF800	3.52	10.39	8.57	0.55	0.27	T	T	9.85e-05	0.0035	Multiple_Complex
TC0900012156.hg.1	paralemmin 2	PALM2	3.51	7.21	5.4	0.35	0.35	T	T	3.29e-05	0.0015	Multiple_Complex
TC1600007874.hg.1	chromodomain helicase DNA binding protein 9	CHD9	3.51	12.78	10.96	1.06	0.57	T	T	0.0012	0.0244	Multiple_Complex
TC1900008496.hg.1	protein phosphatase 1, regulatory subunit 15A	PPP1R15A	3.51	8.75	6.94	0.83	0.27	T	T	0.0002	0.007	Multiple_Complex
TC0600014098.hg.1	alpha tubulin acetyltransferase 1	ATAT1	3.51	10.81	9	0.53	0.67	T	T	3.91e-05	0.0017	Multiple_Complex
TC0200015087.hg.1	SEC14 and spectrin domains 1	SESTD1	3.51	10.91	9.1	0.22	0.38	T	T	1.91e-06	0.0002	Multiple_Complex
TC0600011138.hg.1	histone cluster 1, H1d	HIST1H1D	3.51	13.72	11.91	0.05	0.41	T	T	0.0005	0.0127	Multiple_Complex
TC1_KI270711v1_random00006432.hg.1		AC240274.1	3.5	11.63	9.82	0.44	0.26	T	T	3.23e-05	0.0015	Coding
TC0800007330.hg.1	DDHD domain containing 2	DDHD2	3.5	11.38	9.58	0.07	0.43	T	T	1.72e-06	0.0001	Multiple_Complex
TC1200006888.hg.1	cyclin-dependent kinase inhibitor 1B (p27, Kip1)	CDKN1B	3.49	10.75	8.95	0.59	0.63	T	T	7.73e-05	0.0029	Multiple_Complex
TC0200016710.hg.1	ankyrin repeat domain 36C	ANKRD36C	3.49	11.37	9.56	0.84	0.26	T	T	0.005	0.0682	Multiple_Complex
TC0300006658.hg.1	fibulin 2	FBLN2	3.49	7.2	5.4	0.25	0.69	T	T	0.0001	0.0037	Multiple_Complex
TC0100016917.hg.1	cysteine and glycine-rich protein 1	CSRP1	3.48	11.43	9.63	2.3	0.5	T	T	0.0455	0.2844	Multiple_Complex
TC0100015236.hg.1	late endosomal/lysosomal adaptor, MAPK and MTOR activator 5	LAMTOR5	3.48	13.03	11.23	0.14	0.31	T	T	1.11e-06	9.6e-05	Multiple_Complex
TC1300008894.hg.1	regulator of chromosome condensation (RCC1) and BTB (POZ) domain containing protein 2	RCBTB2	3.48	10.03	8.23	0.35	0.7	T	T	5.22e-05	0.0022	Multiple_Complex
TC1400009705.hg.1	placental growth factor	PGF	3.48	8.49	6.69	1.13	0.19	T	T	0.0002	0.0052	Multiple_Complex
TC0100017072.hg.1	ELK4, ETS-domain protein (SRF accessory protein 1)	ELK4	3.47	15.41	13.62	0.14	0.5	T	T	0.0011	0.0232	Multiple_Complex
TC0300013215.hg.1	transducin (beta)-like 1 X-linked receptor 1	TBL1XR1	3.47	11.82	10.03	0.89	0.72	T	T	0.0045	0.0634	Multiple_Complex
TC2200007037.hg.1	myotubularin related protein 3	MTMR3	3.47	10.68	8.89	0.25	0.54	T	T	1.03e-06	9.04e-05	Multiple_Complex
TC1200012308.hg.1	nuclear receptor corepressor 2	NCOR2	3.47	12.17	10.37	0.13	0.68	T	T	4.01e-05	0.0017	Multiple_Complex
TC0X00007205.hg.1	histone deacetylase 6	HDAC6	3.47	11.31	9.51	0.48	0.25	T	T	1.62e-05	0.0008	Multiple_Complex
TC1000010367.hg.1	zinc finger protein 25	ZNF25	3.46	6.29	4.5	1.14	0.36	T	T	0.0192	0.1699	Multiple_Complex
TC1200010277.hg.1	Synthetic construct Homo sapiens clone IMAGE:100069208, MGC:199219 OVOS2 protein (OVOS2) mRNA, encodes complete protein.	OVOS2	3.46	7.97	6.17	0.28	0.64	T	T	0.009	0.1029	Multiple_Complex
TC2000006861.hg.1	Ras and Rab interactor 2	RIN2	3.46	9.04	7.25	0.98	0.26	T	T	1.21e-05	0.0007	Multiple_Complex
TC0100010197.hg.1	platelet endothelial aggregation receptor 1	PEAR1	3.45	6.38	4.59	0.26	0.45	T	T	4.06e-06	0.0003	Multiple_Complex
TC0600008099.hg.1	polymerase (DNA directed), eta	POLH	3.45	8.87	7.08	0.89	0.83	T	T	0.0002	0.0057	Multiple_Complex
TC1000012542.hg.1	zinc finger protein 438	ZNF438	3.45	9.04	7.25	0.3	0.56	T	T	3.9e-05	0.0017	Multiple_Complex
TC1100012269.hg.1	Rho GTPase activating protein 20	ARHGAP20	3.45	5.79	4.01	1.45	0.21	T	F	6.75e-06	0.0004	Coding
TC1700010274.hg.1	bleomycin hydrolase	BLMH	3.45	13.59	11.81	0.33	0.39	T	T	7.23e-05	0.0028	Multiple_Complex
TC1900006499.hg.1	AT rich interactive domain 3A (BRIGHT-like)	ARID3A	3.45	14.28	12.5	0.25	0.13	T	T	4.86e-06	0.0003	Multiple_Complex
TC0100014040.hg.1	phosphoinositide-3-kinase, regulatory subunit 3 (gamma)	PIK3R3	3.45	11.7	9.91	0.1	0.38	T	T	1.48e-05	0.0008	Multiple_Complex
TC0500007798.hg.1		CTD-2503O16.1	3.44	9.97	8.18	0.06	0.71	T	T	0.0004	0.0098	Multiple_Complex
TC1300009856.hg.1	tubulin, gamma complex associated protein 3	TUBGCP3	3.44	11.35	9.57	0.39	0.66	T	T	2.75e-06	0.0002	Multiple_Complex
TC0600011197.hg.1	zinc finger protein 184	ZNF184	3.44	10.8	9.01	0.75	0.86	T	T	0.0031	0.0486	Multiple_Complex
TC0700013510.hg.1	KDEL (Lys-Asp-Glu-Leu) endoplasmic reticulum protein retention receptor 2	KDELR2	3.44	16.39	14.61	0.36	0.56	T	T	0.0007	0.0169	Multiple_Complex
TC1900011640.hg.1	ephrin-A2	EFNA2	3.44	7.88	6.1	0.47	0.74	T	T	0.0002	0.0054	Multiple_Complex
TC1200012808.hg.1	R3H domain containing 2	R3HDM2	3.43	12.16	10.39	0.53	0.12	T	T	0.0006	0.0137	Multiple_Complex
TC0X00009440.hg.1	chromosome X open reading frame 38	CXorf38	3.43	11.07	9.3	0.07	0.45	T	T	3.86e-06	0.0003	Coding
TC0200012598.hg.1		AC069157.1	3.42	6.17	4.4	0.23	0.79	T	T	0.0012	0.0248	Multiple_Complex
TC2200007312.hg.1	lectin, galactoside-binding, soluble, 1	LGALS1	3.42	7.61	5.83	0.43	0.43	T	T	0.0146	0.1416	Multiple_Complex
TC0600012113.hg.1	bone morphogenetic protein 5	BMP5	3.42	8.09	6.32	0.07	0.16	T	T	0.0105	0.1143	Multiple_Complex
TC0300006702.hg.1	calpain 7	CAPN7	3.42	11.37	9.6	0.65	0.47	T	T	0.0028	0.0461	Multiple_Complex
TC0700007370.hg.1	AE binding protein 1; microRNA 4649	AEBP1; MIR4649	3.41	11.76	9.98	0.2	0.25	T	T	4.48e-05	0.0019	Multiple_Complex
TC0700008517.hg.1	zinc finger with KRAB and SCAN domains 1	ZKSCAN1	3.41	12.74	10.97	0.48	0.99	T	T	0.005	0.0682	Multiple_Complex
TC0800010506.hg.1	pleiomorphic adenoma gene 1	PLAG1	3.4	10.76	9	0.85	0.53	T	T	0.0014	0.0268	Multiple_Complex
TC0600014264.hg.1	dimethylarginine dimethylaminohydrolase 2	DDAH2	3.4	10.72	8.96	0.26	0.41	T	T	0.0003	0.0091	Multiple_Complex
TC1700012297.hg.1	protein kinase, cAMP-dependent, regulatory, type I, alpha	PRKAR1A	3.4	12.15	10.39	0.59	0.48	T	T	0.0083	0.097	Multiple_Complex
TC1900009576.hg.1	zinc finger protein 699	ZNF699	3.4	10.3	8.54	0.25	0.27	T	T	1.01e-06	8.89e-05	Multiple_Complex
TC0100015192.hg.1	proline/serine-rich coiled-coil 1	PSRC1	3.4	9.13	7.37	0.52	0.46	T	T	0.0047	0.0655	Multiple_Complex
TC0400011188.hg.1	lin-54 DREAM MuvB core complex component	LIN54	3.39	8.97	7.21	0.37	0.35	T	T	1.47e-05	0.0008	Multiple_Complex
TC0X00009917.hg.1	ectodysplasin A2 receptor	EDA2R	3.39	10.22	8.46	0.26	0.79	T	T	0.0214	0.1817	Multiple_Complex
TC1200012791.hg.1	formin like 3	FMNL3	3.39	6.71	4.95	0.17	0.25	T	T	2.36e-06	0.0002	Multiple_Complex
TC0500013351.hg.1	folliculin interacting protein 1	FNIP1	3.39	10.74	8.98	0.34	0.47	T	T	0.0004	0.0102	Multiple_Complex
TC1600011060.hg.1	coactosin-like F-actin binding protein 1	COTL1	3.38	15.96	14.2	0.64	0.48	T	T	4.15e-06	0.0003	Multiple_Complex
TC1200010806.hg.1	mitogen-activated protein kinase kinase kinase 12	MAP3K12	3.37	8.44	6.68	0.34	0.37	T	T	0.0002	0.0059	Multiple_Complex
TC0100007006.hg.1	spen family transcriptional repressor	SPEN	3.37	13.13	11.38	0.54	0.47	T	T	0.0009	0.0193	Multiple_Complex
TC0400009110.hg.1	glutamate receptor, ionotropic, AMPA 2	GRIA2	3.37	6.41	4.66	0.55	0.17	T	T	0.0007	0.0161	Multiple_Complex
TC1100007366.hg.1	tetratricopeptide repeat domain 17	TTC17	3.37	13.28	11.52	0.49	0.43	T	T	0.0009	0.0202	Multiple_Complex
TC1600008231.hg.1	nuclear factor of activated T-cells 5, tonicity-responsive	NFAT5	3.36	12.12	10.37	0.6	0.13	T	T	0.0003	0.0081	Multiple_Complex
TC1300007187.hg.1	tripartite motif containing 13; potassium channel regulator	TRIM13; KCNRG	3.36	12.34	10.6	0.2	1.14	T	T	0.0003	0.009	Multiple_Complex
TC1300007756.hg.1	mitochondrially encoded NADH:ubiquinone oxidoreductase core subunit 5 pseudogene 2 [Source:HGNC Symbol;Acc:HGNC:41919]	MTND5P2	3.36	7.51	5.76	0.12	0.37	T	T	0.0003	0.0084	Multiple_Complex
TC0700012230.hg.1	neuronal cell adhesion molecule	NRCAM	3.36	10.08	8.33	0.37	0.38	T	T	0.0007	0.0164	Multiple_Complex
TC0300007392.hg.1	family with sequence similarity 212, member A	FAM212A	3.35	5.31	3.57	0.37	0.13	T	T	8.77e-05	0.0032	Coding
TC0500009766.hg.1	novel transcript	CTC-338M12.9	3.35	12.47	10.72	0.73	0.43	T	T	0.0039	0.0582	Multiple_Complex
TC1300008938.hg.1	deleted in lymphocytic leukemia 2 (non-protein coding); microRNA 15a; microRNA 16-1; microRNA 3613	DLEU2; MIR15A; MIR16-1; MIR3613	3.35	9.49	7.75	0.21	0.62	T	T	0.0004	0.0097	Multiple_Complex
TC0400011518.hg.1	integrator complex subunit 12	INTS12	3.34	13.64	11.9	0.38	0.27	T	T	3.65e-07	3.9e-05	Multiple_Complex
TC0100015561.hg.1	neuroblastoma breakpoint family, member 15	NBPF15	3.34	10.69	8.95	0.16	0.92	T	T	4.15e-06	0.0003	Multiple_Complex
TC0100013925.hg.1	mediator complex subunit 8	MED8	3.34	10.04	8.3	0.4	0.36	T	T	0.0003	0.0085	Multiple_Complex
TC0X00010473.hg.1	TSC22 domain family, member 3	TSC22D3	3.34	8.55	6.82	0.26	0.39	T	T	2.1e-07	2.49e-05	Coding
TC0800008235.hg.1	family with sequence similarity 92, member A1	FAM92A1	3.34	13.32	11.58	0.09	0.43	T	T	1.26e-05	0.0007	Multiple_Complex
TC1400008014.hg.1	Ras and Rab interactor 3	RIN3	3.34	5.65	3.91	0.14	0.65	T	F	0.0001	0.0044	Multiple_Complex
TC0100008101.hg.1	kinesin family member 2C	KIF2C	3.34	14.52	12.79	0.62	0.38	T	T	0.0004	0.0107	Multiple_Complex
TC1400006851.hg.1	Rho GTPase activating protein 5	ARHGAP5	3.33	12.65	10.91	1.15	0.49	T	T	0.0018	0.0328	Multiple_Complex
TC1500010042.hg.1	cytochrome P450, family 1, subfamily A, polypeptide 1	CYP1A1	3.33	6.69	4.96	1.43	0.35	T	F	1.2e-05	0.0007	Multiple_Complex
TC0500010540.hg.1	leukemia inhibitory factor receptor alpha	LIFR	3.33	10.69	8.95	0.92	0.41	T	T	0.0371	0.2533	Multiple_Complex
TC0100009402.hg.1	choline/ethanolamine phosphotransferase 1	CEPT1	3.32	11.98	10.25	0.33	0.18	T	T	1.39e-05	0.0007	Multiple_Complex
TC0600007530.hg.1	major histocompatibility complex, class I, E	HLA-E	3.32	9.41	7.67	0.59	0.25	T	T	0.0007	0.0167	Multiple_Complex
TC0100013552.hg.1	small nucleolar RNA, C/D box 103C	SNORD103C	3.32	7.66	5.92	0.36	0.49	T	T	4.38e-06	0.0003	Multiple_Complex
TC1900011766.hg.1	MAP/microtubule affinity-regulating kinase 4	MARK4	3.31	13.16	11.43	0.12	0.51	T	T	8.97e-05	0.0033	Multiple_Complex
TC1200010284.hg.1	DENN/MADD domain containing 5B	DENND5B	3.31	11.45	9.72	0.33	0.04	T	T	6.83e-09	1.39e-06	Multiple_Complex
TC0900008318.hg.1	transmembrane protein 38B	TMEM38B	3.31	11.68	9.95	0.3	0.81	T	T	6.5e-05	0.0026	Multiple_Complex
TC2100008233.hg.1	zinc finger and BTB domain containing 21	ZBTB21	3.31	13.56	11.84	0.25	0.01	T	T	2.99e-06	0.0002	Multiple_Complex
TC1200007053.hg.1	spexin hormone	SPX	3.31	6.6	4.88	1.2	0.47	T	T	0.0103	0.1126	Multiple_Complex
TC0700012293.hg.1	transmembrane protein 168	TMEM168	3.3	10.2	8.48	0.97	0.55	T	T	0.0002	0.0051	Multiple_Complex
TC0300008332.hg.1	transgelin 3	TAGLN3	3.3	6.89	5.17	0.5	0.27	T	T	0.0005	0.0127	Coding
TC2100008143.hg.1	v-ets avian erythroblastosis virus E26 oncogene homolog	ERG	3.3	7.97	6.25	0.53	0.65	T	T	0.0038	0.0568	Multiple_Complex
TC1700012277.hg.1	CDK5 regulatory subunit associated protein 3	CDK5RAP3	3.3	11.65	9.93	0.32	0.35	T	T	5.7e-05	0.0023	Multiple_Complex
TC0600012839.hg.1	cyclin-dependent kinase 19	CDK19	3.3	10.44	8.72	0.25	1.11	T	T	0.0001	0.0048	Multiple_Complex
TC1200011844.hg.1	transmembrane protein 119	TMEM119	3.29	7.29	5.57	0.67	0.32	T	T	2.77e-07	3.12e-05	Multiple_Complex
TC0200007249.hg.1	G-patch domain containing 11	GPATCH11	3.29	10.82	9.1	0.73	0.97	T	T	0.0001	0.0048	Multiple_Complex
TC0700012115.hg.1	N-acyl phosphatidylethanolamine phospholipase D	NAPEPLD	3.29	10.02	8.3	0.43	0.61	T	T	0.0001	0.0037	Multiple_Complex
TC0900008869.hg.1	outer dense fiber of sperm tails 2	ODF2	3.28	12.98	11.27	0.47	0.95	T	T	4.34e-06	0.0003	Multiple_Complex
TC1900011709.hg.1	FXYD domain containing ion transport regulator 1	FXYD1	3.28	5.46	3.75	0.5	0.27	T	F	0.0002	0.0063	Multiple_Complex
TC0300009202.hg.1	muscleblind like splicing regulator 1	MBNL1	3.28	11.29	9.58	0.92	0.85	T	T	0.0057	0.0754	Multiple_Complex
TC0X00010944.hg.1		RP11-332E4.1	3.28	13.7	11.99	0.99	0.92	T	T	0.041	0.2684	Multiple_Complex
TC0400011949.hg.1	mastermind-like transcriptional coactivator 3	MAML3	3.27	7.69	5.98	0.72	0.18	T	T	0.0043	0.062	Multiple_Complex
TC0400009458.hg.1	CDKN2A interacting protein	CDKN2AIP	3.27	11.28	9.58	0.69	0.69	T	T	0.0002	0.0072	Multiple_Complex
TC1900010460.hg.1	zinc finger protein 792	ZNF792	3.26	9.12	7.41	0.27	0.36	T	T	5.78e-06	0.0004	Multiple_Complex
TC0X00010097.hg.1	ring finger protein, LIM domain interacting	RLIM	3.26	11.57	9.87	0.72	0.68	T	T	0.0003	0.008	Multiple_Complex
TC1200007145.hg.1		RP11-582E3.4	3.25	10.25	8.55	0.43	0.74	T	T	3.12e-05	0.0014	Multiple_Complex
TC0300011834.hg.1	filamin A interacting protein 1-like	FILIP1L	3.25	7.09	5.39	1.03	0.44	T	F	0.0182	0.1646	Multiple_Complex
TC1200010591.hg.1	cyclin T1	CCNT1	3.25	13.86	12.16	0.2	0.55	T	T	0.0001	0.0043	Multiple_Complex
TC0700006603.hg.1	forkhead box K1	FOXK1	3.25	8	6.3	0.77	0.14	T	T	4.52e-06	0.0003	Multiple_Complex
TC1000008800.hg.1	glutathione S-transferase omega 1	GSTO1	3.25	10.01	8.31	0.24	0.63	T	T	2.35e-06	0.0002	Multiple_Complex
TC0400009223.hg.1	carboxypeptidase E	CPE	3.25	12.56	10.86	1.52	0.1	T	T	0.0004	0.0102	Coding
TC0200012009.hg.1	dystrobrevin beta	DTNB	3.25	11.79	10.09	0.64	0.36	T	T	0.0012	0.0236	Multiple_Complex
TC1300009376.hg.1	SLIT and NTRK-like family, member 1	SLITRK1	3.24	9.5	7.81	0.62	0.58	T	T	0.001	0.021	Coding
TC0100014175.hg.1	epidermal growth factor receptor pathway substrate 15	EPS15	3.24	13.51	11.81	0.58	0.35	T	T	0.0008	0.0173	Multiple_Complex
TC1200010615.hg.1	limb development membrane protein 1-like	LMBR1L	3.24	10.44	8.75	0.42	0.36	T	T	5.37e-06	0.0003	Multiple_Complex
TC0800006680.hg.1	tankyrase, TRF1-interacting ankyrin-related ADP-ribose polymerase	TNKS	3.24	11.78	10.08	0.15	0.1	T	T	8.18e-07	7.54e-05	Multiple_Complex
TC0X00009977.hg.1	sorting nexin 12	SNX12	3.24	11.65	9.95	0.47	0.43	T	T	1.19e-05	0.0007	Multiple_Complex
TC1700009541.hg.1	calmodulin binding transcription activator 2	CAMTA2	3.24	9.41	7.72	0.74	0.51	T	T	0.0005	0.0121	Multiple_Complex
TC0100018286.hg.1	neuroblastoma breakpoint family, member 19	NBPF19	3.23	9.43	7.74	0.6	0.52	T	T	6.44e-05	0.0025	Coding
TC0300011264.hg.1	interleukin 17 receptor D	IL17RD	3.23	13.89	12.2	0.27	0.28	T	T	0.011	0.1176	Multiple_Complex
TC1100007833.hg.1	inner centromere protein	INCENP	3.23	13.07	11.38	0.48	0.96	T	T	8.55e-06	0.0005	Multiple_Complex
TC1000008716.hg.1	golgi brefeldin A resistant guanine nucleotide exchange factor 1	GBF1	3.23	13.69	12	0.3	0.17	T	T	6.17e-05	0.0025	Multiple_Complex
TC0700008149.hg.1	putative homeodomain transcription factor 2	PHTF2	3.23	10.78	9.09	0.28	1.03	T	T	0.0001	0.0036	Multiple_Complex
TC0900008173.hg.1	acidic nuclear phosphoprotein 32 family member B	ANP32B	3.22	16.1	14.41	0.27	0.17	T	T	1.17e-06	0.0001	Multiple_Complex
TC0300007490.hg.1	small nucleolar RNA, C/D box 19	SNORD19	3.22	8.2	6.51	0.53	1.09	T	T	0.0008	0.0175	Multiple_Complex
TC0700011785.hg.1	cyclin-dependent kinase 6	CDK6	3.22	7.75	6.06	0.44	0.38	T	T	0.0093	0.105	Multiple_Complex
TC0200014728.hg.1	LY75-CD302 readthrough; CD302 molecule; lymphocyte antigen 75	LY75-CD302; CD302; LY75	3.22	8.98	7.3	0.38	0.42	T	T	0.0005	0.0131	Multiple_Complex
TC2000009923.hg.1	Sys1 golgi trafficking protein	SYS1	3.22	8.68	6.99	0.4	1.02	T	T	0.0002	0.0052	Multiple_Complex
TC0100010397.hg.1	NUF2, NDC80 kinetochore complex component	NUF2	3.21	12.23	10.55	0.73	0.49	T	T	0.0044	0.0632	Multiple_Complex
TC1600010494.hg.1		CTA-331F8.1	3.21	7.9	6.22	0.62	0.31	T	T	2.78e-05	0.0013	Multiple_Complex
TC0800008783.hg.1	squalene epoxidase	SQLE	3.21	15.62	13.94	0.29	0.49	T	T	6.4e-05	0.0025	Multiple_Complex
TC0200009662.hg.1	tumor necrosis factor, alpha-induced protein 6	TNFAIP6	3.21	6.85	5.16	0.58	0.4	T	T	8.46e-06	0.0005	Multiple_Complex
TC0300007055.hg.1	CTD small phosphatase like	CTDSPL	3.2	14.56	12.89	0.66	0.55	T	T	7.82e-05	0.0029	Multiple_Complex
TC0400009258.hg.1	palladin, cytoskeletal associated protein	PALLD	3.2	12.08	10.4	0.79	0.56	T	T	0.0066	0.0828	Multiple_Complex
TC1700007811.hg.1	transmembrane protein 99	TMEM99	3.2	9.05	7.37	0.25	0.29	T	T	1.97e-06	0.0002	Multiple_Complex
TC0600007711.hg.1	inositol 1,4,5-trisphosphate receptor, type 3	ITPR3	3.19	9.43	7.76	0.64	0.32	T	T	0.0057	0.0753	Multiple_Complex
TC0X00008381.hg.1	oculocerebrorenal syndrome of Lowe	OCRL	3.19	10.68	9.01	0.28	0.2	T	T	3.78e-06	0.0003	Multiple_Complex
TC0800009619.hg.1	cathepsin B	CTSB	3.19	12.77	11.09	1.11	0.18	T	T	8.13e-06	0.0005	Multiple_Complex
TC0600013001.hg.1	centrosomal protein 85kDa-like	CEP85L	3.19	8.51	6.83	0.67	0.79	T	T	0.0055	0.0727	Multiple_Complex
TC1200009722.hg.1	tumor necrosis factor receptor superfamily, member 1A	TNFRSF1A	3.18	12.29	10.62	0.42	0.36	T	T	2.14e-05	0.0011	Multiple_Complex
TC1700010738.hg.1	enhancer of zeste 1 polycomb repressive complex 2 subunit	EZH1	3.18	11.35	9.68	0.3	0.37	T	T	1.26e-05	0.0007	Multiple_Complex
TC1800007927.hg.1	discs, large (Drosophila) homolog-associated protein 1	DLGAP1	3.18	8.59	6.92	0.05	0.09	T	T	0.0004	0.0096	Multiple_Complex
TC1700008661.hg.1	protein kinase C, alpha	PRKCA	3.18	7.72	6.05	0.45	0.17	T	T	4.38e-05	0.0019	Multiple_Complex
TC0900012207.hg.1	chloride channel, voltage-sensitive 3 pseudogene 1 [Source:HGNC Symbol;Acc:HGNC:49775]	CLCN3P1	3.18	10.55	8.88	0.7	0.5	T	T	0.0051	0.0695	Multiple_Complex
TC1500010422.hg.1	isocitrate dehydrogenase 2 (NADP+), mitochondrial	IDH2	3.17	12.91	11.24	0.23	0.36	T	T	1.73e-06	0.0001	Multiple_Complex
TC2000007572.hg.1	nuclear receptor coactivator 3	NCOA3	3.17	13.83	12.17	0.26	0.39	T	T	0.0011	0.023	Multiple_Complex
TC1600010916.hg.1		AC025284.1	3.17	12.95	11.29	0.33	0.53	T	T	0.0016	0.0299	Multiple_Complex
TC0200010482.hg.1	small nucleolar RNA, C/D box 11B	SNORD11B	3.17	9.01	7.34	0.26	0.5	T	T	0.0002	0.0062	Multiple_Complex
TC0300009339.hg.1	microRNA 16-2	MIR16-2	3.17	7.13	5.47	0.42	0.76	T	F	0.0008	0.0172	Multiple_Complex
TC0200007177.hg.1	DEAD/H (Asp-Glu-Ala-Asp/His) box polypeptide 50 pseudogene 1 [Source:HGNC Symbol;Acc:HGNC:18974]	DDX50P1	3.17	7.68	6.02	0.75	0.62	T	T	0.0108	0.1161	Multiple_Complex
TC0200010518.hg.1	abl-interactor 2	ABI2	3.16	13.64	11.98	0.18	0.24	T	T	2.09e-06	0.0002	Multiple_Complex
TC1100008665.hg.1	coiled-coil domain containing 81	CCDC81	3.16	6.28	4.62	0.4	0.68	T	T	0.0034	0.052	Multiple_Complex
TC1500008986.hg.1	lysophosphatidylcholine acyltransferase 4	LPCAT4	3.16	11.9	10.24	0.17	0.46	T	T	0.0002	0.0068	Multiple_Complex
TC0700010671.hg.1	phosphodiesterase 1C, calmodulin-dependent 70kDa	PDE1C	3.16	6.21	4.55	0.76	0.44	T	T	0.0006	0.015	Multiple_Complex
TC0700010697.hg.1	retinitis pigmentosa 9 (autosomal dominant)	RP9	3.16	9.78	8.12	0.37	0.16	T	T	3.72e-06	0.0003	Multiple_Complex
TC0200007536.hg.1	general transcription factor IIA 1-like; STON1-GTF2A1L readthrough; stonin 1	GTF2A1L; STON1-GTF2A1L; STON1	3.15	6.78	5.12	0.83	0.22	T	T	0.0003	0.0076	Multiple_Complex
TC1000006754.hg.1	CUGBP, Elav-like family member 2	CELF2	3.15	12.2	10.54	0.22	0.32	T	T	0.0003	0.0093	Multiple_Complex
TC1000009612.hg.1	Kruppel-like factor 6	KLF6	3.15	11.35	9.7	0.44	0.41	T	T	6.66e-05	0.0026	Multiple_Complex
TC0X00007937.hg.1	dystrophin related protein 2	DRP2	3.15	6.48	4.83	0.56	0.4	T	T	6.21e-05	0.0025	Multiple_Complex
TC0100009241.hg.1	sphingosine-1-phosphate receptor 1	S1PR1	3.15	8.26	6.6	0.68	0.2	T	T	0.0085	0.0985	Multiple_Complex
TC0900006446.hg.1	eukaryotic translation initiation factor 1 pseudogene 1 [Source:HGNC Symbol;Acc:HGNC:49614]	EIF1P1	3.14	6.72	5.07	0.26	0.43	T	T	0.0012	0.0243	Multiple_Complex
TC0600007617.hg.1	chromosome 6 open reading frame 48; small nucleolar RNA, C/D box 52; small nucleolar RNA, C/D box 48	C6orf48; SNORD52; SNORD48	3.14	14.08	12.43	0.21	0.29	T	T	6.96e-06	0.0004	Multiple_Complex
TC1100007293.hg.1	low density lipoprotein receptor class A domain containing 3	LDLRAD3	3.13	11.55	9.91	0.29	0.46	T	T	2.18e-05	0.0011	Multiple_Complex
TC1000009863.hg.1	family with sequence similarity 107, member B	FAM107B	3.13	9.81	8.16	0.4	0.12	T	T	0.0006	0.0137	Multiple_Complex
TC0800010869.hg.1	peroxisomal biogenesis factor 2	PEX2	3.13	11.65	10.01	0.71	0.22	T	T	0.0038	0.0567	Multiple_Complex
TC0100016441.hg.1	centromere protein L	CENPL	3.13	10.05	8.4	0.74	1.03	T	T	0.0004	0.0097	Multiple_Complex
TC1700012304.hg.1	component of oligomeric golgi complex 1	COG1	3.12	10.88	9.24	0.32	0.56	T	T	0.0004	0.0099	Multiple_Complex
TC0200016669.hg.1	ankyrin repeat and SOCS box containing 3	ASB3	3.12	13.06	11.41	0.54	0.42	T	T	0.0005	0.0126	Multiple_Complex
TC0200012933.hg.1	cannabinoid receptor interacting protein 1	CNRIP1	3.12	5.37	3.73	0.63	0.34	T	T	0.0011	0.0224	Multiple_Complex
TC0X00010653.hg.1	ring finger protein 113A	RNF113A	3.12	8.01	6.37	0.12	0.48	T	T	4.15e-05	0.0018	Coding
TC0300009731.hg.1	mitogen-activated protein kinase kinase kinase 13	MAP3K13	3.11	7.12	5.49	0.2	0.7	T	T	0.0011	0.0223	Multiple_Complex
TC0800012301.hg.1	family with sequence similarity 110, member B	FAM110B	3.11	8.89	7.25	0.18	0.09	T	T	0.0005	0.0122	Multiple_Complex
TC1300009249.hg.1	Kruppel-like factor 12	KLF12	3.11	10.37	8.74	0.74	0.01	T	T	0.0003	0.0095	Multiple_Complex
TC0300006454.hg.1	contactin 4	CNTN4	3.09	7.26	5.63	0.51	0.93	T	T	0.0027	0.0448	Multiple_Complex
TC0600013258.hg.1	Abelson helper integration site 1	AHI1	3.09	8.14	6.51	0.82	0.77	T	T	0.0387	0.26	Multiple_Complex
TC1100011652.hg.1	glycerophosphodiester phosphodiesterase domain containing 5	GDPD5	3.09	6.07	4.44	0.52	0.31	T	T	0.0001	0.004	Multiple_Complex
TC0X00007240.hg.1	chloride channel, voltage-sensitive 5	CLCN5	3.09	10.43	8.81	0.36	0.75	T	T	1.68e-05	0.0009	Multiple_Complex
TC1500008805.hg.1		RP11-483E23.5	3.09	5.18	3.55	0.93	0.27	T	F	0.0004	0.0108	Multiple_Complex
TC0100018246.hg.1	leucine rich repeat containing 8 family, member C	LRRC8C	3.08	7.9	6.27	1.01	0.39	T	T	0.0003	0.0077	Multiple_Complex
TC0100016548.hg.1	ABL proto-oncogene 2, non-receptor tyrosine kinase	ABL2	3.08	11.16	9.53	0.2	0.3	T	T	5.19e-05	0.0021	Multiple_Complex
TC1400006962.hg.1		RP11-545M17.2	3.08	5.36	3.74	0.08	0.51	T	T	0.0003	0.0089	Multiple_Complex
TC0100015764.hg.1	family with sequence similarity 63, member A	FAM63A	3.08	7.67	6.05	0.2	0.19	T	T	1.73e-06	0.0001	Multiple_Complex
TC1200007819.hg.1	cyclin-dependent kinase 2	CDK2	3.08	13.32	11.7	0.56	0.16	T	T	3e-06	0.0002	Multiple_Complex
TC0300012564.hg.1	DAZ interacting zinc finger protein 1-like	DZIP1L	3.08	7.98	6.36	0.33	0.34	T	T	8.14e-06	0.0005	Multiple_Complex
TC1800008285.hg.1	Niemann-Pick disease, type C1	NPC1	3.07	13.2	11.58	0.28	0.34	T	T	2.75e-06	0.0002	Multiple_Complex
TC1100010509.hg.1		RP1-145M24.1	3.07	7.78	6.16	0.76	0.29	T	T	0.0002	0.0051	Multiple_Complex
TC0800012351.hg.1	WDYHV motif containing 1	WDYHV1	3.07	11.82	10.2	0.11	0.38	T	T	9.1e-06	0.0005	Multiple_Complex
TC1900011935.hg.1	ZFP30 zinc finger protein	ZFP30	3.06	9.61	8	0.54	0.67	T	T	0.0037	0.0557	Multiple_Complex
TC1700011237.hg.1	vascular endothelial zinc finger 1	VEZF1	3.06	13.95	12.34	0.1	0.35	T	T	4.4e-06	0.0003	Multiple_Complex
TC0100015975.hg.1	Ras-like without CAAX 1	RIT1	3.06	11.24	9.63	0.68	0.87	T	T	0.0003	0.0095	Multiple_Complex
TC1400010644.hg.1	serpin peptidase inhibitor, clade A (alpha-1 antiproteinase, antitrypsin), member 3	SERPINA3	3.06	6.56	4.95	1.82	0.24	T	T	0.0013	0.0263	Multiple_Complex
TC1200010234.hg.1		RP11-874G11.1	3.05	9.01	7.4	0.11	0.46	T	T	0.0069	0.0857	Multiple_Complex
TC1100008788.hg.1	small Cajal body-specific RNA 9	SCARNA9	3.05	12.65	11.05	0.42	0.43	T	T	0.0011	0.0222	Multiple_Complex
TC0100009700.hg.1	SLIT-ROBO Rho GTPase activating protein 2D (pseudogene)	SRGAP2D	3.05	12.21	10.6	0.48	0.2	T	T	1.86e-05	0.0009	Multiple_Complex
TC1500007659.hg.1	protein inhibitor of activated STAT 1	PIAS1	3.05	16.48	14.87	0.57	0.56	T	T	0.0013	0.0265	Multiple_Complex
TC0800008510.hg.1	oxidation resistance 1	OXR1	3.04	9.95	8.34	1.09	0.09	T	T	0.0049	0.0678	Multiple_Complex
TC0600011127.hg.1	histone cluster 1, H1c	HIST1H1C	3.04	10.71	9.1	0.1	0.22	T	T	0.0089	0.1017	Multiple_Complex
TC0800011395.hg.1	LDL receptor related protein 12	LRP12	3.04	9.42	7.82	0.51	0.34	T	T	7.23e-06	0.0004	Multiple_Complex
TC0100013550.hg.1	Homo sapiens small nucleolar RNA, C/D box 103A (SNORD103A), small nucleolar RNA.; Homo sapiens small nucleolar RNA, C/D box 103B (SNORD103B), small nucleolar RNA.	SNORD103A; SNORD103B	3.03	7.32	5.72	0.58	0.04	T	T	9.73e-05	0.0035	Multiple_Complex
TC1500009109.hg.1	chromosome 15 open reading frame 57; mitochondrial ribosomal protein L42 pseudogene 5	C15orf57; MRPL42P5	3.03	11.29	9.69	0.56	0.33	T	T	0.0002	0.0056	Multiple_Complex
TC0900008945.hg.1	G protein-coupled receptor 107	GPR107	3.03	12.88	11.28	0.27	0.03	T	T	2.45e-07	2.83e-05	Multiple_Complex
TC1600010409.hg.1	Bardet-Biedl syndrome 2	BBS2	3.03	10.07	8.47	0.78	0.35	T	T	0.0036	0.0548	Multiple_Complex
TC0200011688.hg.1	ADAM metallopeptidase domain 17	ADAM17	3.03	12.71	11.11	0.15	0.64	T	T	9.66e-06	0.0006	Multiple_Complex
TC1900007386.hg.1	single stranded DNA binding protein 4	SSBP4	3.03	7.39	5.79	0.34	0.5	T	T	0.0002	0.0051	Multiple_Complex
TC1400008635.hg.1	RAB2B, member RAS oncogene family	RAB2B	3.03	12.11	10.51	0.55	0.13	T	T	2.34e-05	0.0011	Multiple_Complex
TC0300009245.hg.1	ribosomal protein L21 pseudogene 42 [Source:HGNC Symbol;Acc:HGNC:37017]	RPL21P42	3.02	7.43	5.83	0.55	0.27	T	T	0.0001	0.0047	Multiple_Complex
TC1000009997.hg.1	cancer susceptibility candidate 10	CASC10	3.02	6.86	5.27	0.37	0.56	T	T	0.0079	0.0939	Multiple_Complex
TC0700010339.hg.1	ribosomal protein L36a pseudogene 26	RPL36AP26	3.02	14.45	12.86	0.01	0.5	T	T	0.001	0.0216	Multiple_Complex
TC0500006803.hg.1	trio Rho guanine nucleotide exchange factor	TRIO	3.02	9.26	7.66	0.28	0.17	T	T	0.0012	0.0247	Multiple_Complex
TC1900010032.hg.1	ceramide synthase 1; growth differentiation factor 1	CERS1; GDF1	3.02	10.01	8.42	0.76	0.13	T	T	0.0005	0.0132	Multiple_Complex
TC1100010987.hg.1	fatty acid binding protein 5 (psoriasis-associated)	FABP5	3.01	13.08	11.49	1.07	0.66	T	T	0.0061	0.0782	Multiple_Complex
TC0600009858.hg.1		RP1-292B18.1	3.01	10.25	8.66	0.48	0.34	T	T	0.0002	0.0058	Multiple_Complex
TC0400012964.hg.1	sodium channel and clathrin linker 1	SCLT1	3	13.17	11.59	0.14	0.38	T	T	0.0006	0.0152	Multiple_Complex
TC2000008198.hg.1	carboxypeptidase X (M14 family), member 1	CPXM1	3	11.65	10.07	0.41	0.47	T	T	7.94e-05	0.003	Multiple_Complex
TC0300008994.hg.1	2-phosphoxylose phosphatase 1	PXYLP1	3	9.06	7.48	0.45	0.66	T	T	0.0001	0.0044	Multiple_Complex
TC0100018166.hg.1	chloride channel, voltage-sensitive 6	CLCN6	3	11.7	10.12	0.23	0.77	T	T	0.0006	0.0138	Multiple_Complex
TC1200007652.hg.1	GRP1 (general receptor for phosphoinositides 1)-associated scaffold protein	GRASP	2.99	8.49	6.91	0.29	0.52	T	T	7.95e-05	0.003	Multiple_Complex
TC0X00008273.hg.1	zinc finger and BTB domain containing 33	ZBTB33	2.99	11.25	9.67	0.85	0.78	T	T	0.029	0.2186	Multiple_Complex
TC1800006889.hg.1	RIO kinase 3	RIOK3	2.99	11.2	9.62	0.46	0.6	T	T	0.0038	0.0571	Multiple_Complex
TC1900011903.hg.1	nuclear receptor subfamily 2, group F, member 6	NR2F6	2.99	10.59	9.01	0.34	0.42	T	T	9.52e-06	0.0005	Multiple_Complex
TC0300013859.hg.1	CD200 molecule	CD200	2.99	15.83	14.25	0.27	0.67	T	T	0.0005	0.0129	Multiple_Complex
TC0X00011248.hg.1	trimethyllysine hydroxylase, epsilon	TMLHE	2.99	8.97	7.39	0.18	0.54	T	T	0.0004	0.0109	Multiple_Complex
TC0500009400.hg.1	Kv channel interacting protein 1	KCNIP1	2.99	7.97	6.39	0.34	0.69	T	T	0.0013	0.0265	Multiple_Complex
TC1900006991.hg.1	solute carrier family 44 (choline transporter), member 2	SLC44A2	2.99	12.53	10.95	0.68	0.38	T	T	2.81e-06	0.0002	Multiple_Complex
TC1100009191.hg.1	interleukin 10 receptor, alpha	IL10RA	2.99	4.92	3.34	0.44	0.11	T	F	9.08e-08	1.24e-05	Multiple_Complex
TC0X00009218.hg.1	ribosomal protein S6 kinase, 90kDa, polypeptide 3	RPS6KA3	2.98	9.85	8.27	0.67	0.76	T	T	8.6e-05	0.0032	Multiple_Complex
TC0300009324.hg.1	IQ motif containing J; schwannomin interacting protein 1; IQCJ-SCHIP1 readthrough	IQCJ; SCHIP1; IQCJ-SCHIP1	2.98	10.97	9.39	0.53	0.45	T	T	0.0002	0.0055	Multiple_Complex
TC0700006781.hg.1	basic leucine zipper and W2 domains 2	BZW2	2.98	13.82	12.24	0.06	0.35	T	T	5.98e-06	0.0004	Multiple_Complex
TC0100016625.hg.1	glutamate-ammonia ligase	GLUL	2.97	16.02	14.45	0.71	0.7	T	T	0.0002	0.0069	Multiple_Complex
TC1100012488.hg.1	intraflagellar transport 46	IFT46	2.97	11.53	9.96	0.54	0.62	T	T	0.0024	0.0401	Multiple_Complex
TC0400009853.hg.1	otopetrin 1	OTOP1	2.97	5.18	3.61	0.73	0.32	T	F	0.0177	0.1612	Coding
TC0800007110.hg.1	epoxide hydrolase 2, cytoplasmic	EPHX2	2.97	7.97	6.4	0.57	0.65	T	T	0.002	0.0353	Multiple_Complex
TC0200010152.hg.1	ubiquitin-conjugating enzyme E2E 3	UBE2E3	2.97	13.6	12.03	0.25	0.19	T	T	2.46e-06	0.0002	Multiple_Complex
TC0500007641.hg.1	phosphoinositide-3-kinase, regulatory subunit 1 (alpha)	PIK3R1	2.97	11.41	9.84	0.62	0.32	T	T	0.0023	0.0395	Multiple_Complex
TC0300011276.hg.1	DENN/MADD domain containing 6A	DENND6A	2.96	12.6	11.04	0.33	0.36	T	T	3.5e-05	0.0016	Multiple_Complex
TC0X00007149.hg.1	TIMP metallopeptidase inhibitor 1	TIMP1	2.96	14.11	12.54	0.88	0.54	T	T	0.0012	0.0243	Multiple_Complex
TC1200011608.hg.1	cyclin-dependent kinase 17	CDK17	2.96	13.46	11.89	0.56	0.11	T	T	8.87e-05	0.0033	Multiple_Complex
TC0900010791.hg.1	small nucleolar RNA, H/ACA box 84; microRNA 3651	SNORA84; MIR3651	2.96	9.39	7.82	0.66	0.28	T	T	0.0025	0.0424	Multiple_Complex
TC1200011067.hg.1	dpy-19-like 2 (C. elegans)	DPY19L2	2.96	8.65	7.09	0.5	0.8	T	T	0.0007	0.0154	Multiple_Complex
TC0X00010799.hg.1	E74-like factor 4 (ets domain transcription factor)	ELF4	2.96	7.3	5.74	0.42	0.49	T	T	0.0002	0.0067	Multiple_Complex
TC0500009077.hg.1	HMG box domain containing 3	HMGXB3	2.96	11.15	9.59	0.32	0.25	T	T	8.52e-07	7.79e-05	Multiple_Complex
TC0100018443.hg.1	phospholipid phosphatase 3	PLPP3	2.95	13.09	11.52	0.79	0.82	T	T	0.0026	0.0431	Multiple_Complex
TC0800006978.hg.1	polymerase (RNA) III (DNA directed) polypeptide D, 44kDa	POLR3D	2.95	13.28	11.72	0.34	0.05	T	T	1.62e-05	0.0008	Multiple_Complex
TC1600009424.hg.1	cytochrome c oxidase subunit VIc pseudogene 1	COX6CP1	2.95	8.88	7.32	0.34	0.4	T	T	4.69e-05	0.002	Multiple_Complex
TC0500009318.hg.1		CTB-95B16.1	2.95	10.51	8.95	0.94	0.67	T	T	0.0006	0.0142	Multiple_Complex
TC0100009770.hg.1	neuroblastoma breakpoint family, member 12	NBPF12	2.95	11.48	9.92	0.65	0.42	T	T	0.0011	0.0235	Multiple_Complex
TC0200013899.hg.1	zinc finger CCCH-type containing 8	ZC3H8	2.95	10.95	9.39	0.43	0.38	T	T	0.0004	0.0111	Multiple_Complex
TC0700008171.hg.1	MAGI2 antisense RNA 3	MAGI2-AS3	2.94	9.89	8.33	0.55	0.89	T	T	0.0015	0.0291	Multiple_Complex
TC2000008722.hg.1	acyl-CoA synthetase short-chain family member 1	ACSS1	2.94	7.74	6.19	0.82	0.43	T	T	0.0017	0.0318	Multiple_Complex
TC0100016833.hg.1	zinc finger and BTB domain containing 41	ZBTB41	2.94	9.38	7.83	0.8	0.85	T	T	0.0184	0.1652	Multiple_Complex
TC0700012584.hg.1	ubiquitin conjugating enzyme E2H	UBE2H	2.93	14.62	13.07	0.42	0.12	T	T	5.2e-06	0.0003	Multiple_Complex
TC1200006654.hg.1	atrophin 1	ATN1	2.93	10.51	8.96	0.08	0.44	T	T	1.17e-05	0.0006	Multiple_Complex
TC0400009284.hg.1	chloride channel, voltage-sensitive 3	CLCN3	2.93	13.76	12.21	0.72	0.48	T	T	0.0023	0.0397	Multiple_Complex
TC1500007645.hg.1	mitogen-activated protein kinase kinase 5	MAP2K5	2.93	8.61	7.06	0.47	0.29	T	T	0.0039	0.0582	Multiple_Complex
TC0100015102.hg.1	collagen, type XI, alpha 1	COL11A1	2.92	9.58	8.03	0.49	0.76	T	T	0.01	0.1103	Multiple_Complex
TC0100010387.hg.1	discoidin domain receptor tyrosine kinase 2	DDR2	2.92	6.27	4.73	0.59	0.46	T	T	2.53e-05	0.0012	Multiple_Complex
TC1100013226.hg.1	ALG9, alpha-1,2-mannosyltransferase	ALG9	2.92	9.66	8.12	0.17	0.26	T	T	4.96e-07	4.99e-05	Multiple_Complex
TC1200010023.hg.1	endoplasmic reticulum protein 27	ERP27	2.92	7.01	5.46	0.89	0.16	T	T	0.0471	0.2899	Multiple_Complex
TC1100010058.hg.1	DENN/MADD domain containing 5A	DENND5A	2.92	10.74	9.2	0.19	0.29	T	T	3.55e-06	0.0002	Multiple_Complex
TC0300013949.hg.1	SATB homeobox 1	SATB1	2.92	11.84	10.3	0.14	0.43	T	T	0.0008	0.018	Multiple_Complex
TC0300013151.hg.1	neutral cholesterol ester hydrolase 1	NCEH1	2.92	8.71	7.16	0.59	0.58	T	T	9.33e-05	0.0034	Multiple_Complex
TC2200006678.hg.1	synaptosome associated protein 29kDa	SNAP29	2.91	11.85	10.3	0.66	0.45	T	T	0.0013	0.0256	Multiple_Complex
TC0100017505.hg.1	SDE2 telomere maintenance homolog (S. pombe)	SDE2	2.91	11.44	9.9	0.39	0.67	T	T	2.03e-05	0.001	Multiple_Complex
TC1300009933.hg.1	RAS p21 protein activator 3	RASA3	2.91	9.09	7.54	0.14	0.21	T	T	4.01e-05	0.0017	Multiple_Complex
TC1700011234.hg.1	CUE domain containing 1	CUEDC1	2.91	9.24	7.7	0.25	0.3	T	T	1.27e-05	0.0007	Multiple_Complex
TC0600007402.hg.1	zinc finger with KRAB and SCAN domains 8	ZKSCAN8	2.91	13.08	11.54	0.62	0.38	T	T	0.0038	0.057	Multiple_Complex
TC1700009861.hg.1	trans-golgi network vesicle protein 23 homolog C (S. cerevisiae); CMT1A duplicated region transcript 4; TVP23C-CDRT4 readthrough	TVP23C; CDRT4; TVP23C-CDRT4	2.91	13.59	12.05	0.51	0.37	T	T	0.0013	0.0264	Multiple_Complex
TC0900009949.hg.1	tropomyosin 2 (beta)	TPM2	2.91	13.5	11.97	0.37	0.27	T	T	1.37e-05	0.0007	Multiple_Complex
TC1700011084.hg.1	protein phosphatase 1, regulatory subunit 9B	PPP1R9B	2.91	7.54	6	0.41	0.51	T	T	4.9e-05	0.002	Multiple_Complex
TC2000007246.hg.1	discs, large (Drosophila) homolog-associated protein 4	DLGAP4	2.9	10.83	9.29	0.67	0.22	T	T	5.52e-05	0.0023	Multiple_Complex
TC0700011658.hg.1	sema domain, immunoglobulin domain (Ig), short basic domain, secreted, (semaphorin) 3E	SEMA3E	2.9	6.68	5.15	1.59	0.47	T	T	0.0296	0.2214	Coding
TC0X00010895.hg.1	zinc finger protein 75D	ZNF75D	2.9	8.66	7.13	1.17	0.45	T	T	0.0024	0.0403	Multiple_Complex
TC1500010945.hg.1	lines homolog 1	LINS1	2.9	9.61	8.08	0.62	0.71	T	T	0.0004	0.0103	Multiple_Complex
TC1600010902.hg.1	ribosomal protein L18 pseudogene 13	RPL18P13	2.9	11.61	10.08	0.07	0.7	T	T	0.0088	0.101	Multiple_Complex
TC1900010529.hg.1	zinc finger protein 529	ZNF529	2.9	8.79	7.25	0.35	0.21	T	T	2.11e-06	0.0002	Multiple_Complex
TC1900006576.hg.1	DOT1-like histone H3K79 methyltransferase	DOT1L	2.9	10.62	9.09	0.29	0.37	T	T	0.0004	0.0108	Multiple_Complex
TC0800008080.hg.1	fatty acid binding protein 5 (psoriasis-associated)	FABP5	2.9	13.68	12.15	0.95	0.3	T	T	0.0143	0.1401	Multiple_Complex
TC1100011398.hg.1	MAS-related GPR, member D	MRGPRD	2.89	7.5	5.97	0.61	0.36	T	T	0.0089	0.1018	Coding
TC0200015058.hg.1	DnaJ heat shock protein family (Hsp40) member C19 pseudogene 5 [Source:HGNC Symbol;Acc:HGNC:45068]	DNAJC19P5	2.89	9.05	7.52	1.14	0.41	T	T	6.62e-05	0.0026	Multiple_Complex
TC1100011797.hg.1	RAB30, member RAS oncogene family	RAB30	2.89	8.75	7.22	0.58	0.6	T	T	0.0004	0.0107	Multiple_Complex
TC1700006980.hg.1	ribosomal protein L9 pseudogene 2	RPL9P2	2.89	6.92	5.39	0.18	0.88	T	T	0.0137	0.1363	Multiple_Complex
TC0400012956.hg.1	ELOVL fatty acid elongase 6	ELOVL6	2.89	15.75	14.22	0.44	0.65	T	T	0.0011	0.0233	Multiple_Complex
TC1100011054.hg.1	RAB3A interacting protein (rabin3)-like 1	RAB3IL1	2.89	10.14	8.61	0.17	0.03	T	T	0.0002	0.0069	Multiple_Complex
TC0100011472.hg.1	hedgehog acyltransferase	HHAT	2.89	7.47	5.94	0.18	0.54	T	T	0.0002	0.0055	Multiple_Complex
TC1700007911.hg.1		CTD-3193K9.1	2.88	9.34	7.82	0.25	0.49	T	T	7.8e-06	0.0005	Multiple_Complex
TC0X00008108.hg.1	transmembrane protein 164	TMEM164	2.88	9.14	7.61	0.34	0.32	T	T	5.02e-05	0.0021	Multiple_Complex
TC0100015652.hg.1	RNA, U1 small nuclear 122, pseudogene [Source:HGNC Symbol;Acc:HGNC:48464]	RNU1-122P	2.88	7.62	6.09	0.27	0.54	T	T	0.0208	0.1786	Multiple_Complex
TC1400010625.hg.1	zinc finger protein 410	ZNF410	2.87	7.54	6.01	0.36	0.6	T	T	0.0004	0.0108	Multiple_Complex
TC0600010609.hg.1	PX domain containing 1	PXDC1	2.87	6.6	5.08	0.46	0.18	T	T	7.43e-05	0.0028	Multiple_Complex
TC0300011936.hg.1	CD47 molecule	CD47	2.87	11.9	10.38	0.17	0.28	T	T	0.0009	0.019	Multiple_Complex
TC1700008474.hg.1		RP5-1073F15.1	2.87	6.05	4.52	0.22	0.21	T	T	7.06e-06	0.0004	Multiple_Complex
TC0400012432.hg.1	high mobility group box 2	HMGB2	2.87	16.17	14.65	0.56	0.1	T	T	0.0137	0.1358	Multiple_Complex
TC0X00010982.hg.1	cerebellar degeneration related protein 1	CDR1	2.87	13.56	12.04	0.28	0.75	T	T	0.0066	0.0825	Coding
TC1200012143.hg.1	citron rho-interacting serine/threonine kinase; microRNA 1178	CIT; MIR1178	2.87	11.26	9.74	0.3	0.12	T	T	0.0004	0.0114	Multiple_Complex
TC1700008378.hg.1	musashi RNA binding protein 2	MSI2	2.87	11.57	10.05	0.05	0.48	T	T	3.27e-06	0.0002	Multiple_Complex
TC1600006550.hg.1	transmembrane protein 204	TMEM204	2.86	4.99	3.47	0.41	0.09	T	F	1.36e-06	0.0001	Coding
TC0X00010607.hg.1	kelch-like family member 13	KLHL13	2.86	9.72	8.21	0.1	0.37	T	T	1.55e-05	0.0008	Multiple_Complex
TC1700010001.hg.1	small nucleolar RNA, C/D box 3D	SNORD3D	2.86	13.96	12.45	0.91	0.51	T	T	0.022	0.1848	Multiple_Complex
TC1200011587.hg.1		RP11-490G8.1	2.86	12.79	11.28	0.19	0.42	T	T	0.0025	0.0418	Multiple_Complex
TC1200009890.hg.1	C-type lectin domain family 1, member A	CLEC1A	2.86	5.57	4.05	0.32	0.26	T	T	2.18e-05	0.0011	Coding
TC2200008181.hg.1	zinc finger protein 70	ZNF70	2.86	7.97	6.46	0.48	0.44	T	T	6.68e-05	0.0026	Multiple_Complex
TC0200015009.hg.1	activating transcription factor 2	ATF2	2.85	14.09	12.58	0.52	0.84	T	T	0.0307	0.2263	Multiple_Complex
TC0400008289.hg.1	poly(A) binding protein, cytoplasmic 1 pseudogene 7 [Source:HGNC Symbol;Acc:HGNC:37987]	PABPC1P7	2.85	6.2	4.69	0.24	0.61	T	T	0.0006	0.0142	Multiple_Complex
TC0900011379.hg.1	multiple EGF-like-domains 9	MEGF9	2.85	6.21	4.7	0.18	0.25	T	T	0.0002	0.0051	Multiple_Complex
TC0X00011302.hg.1	moesin	MSN	2.85	15.54	14.03	0.17	0.51	T	T	1.13e-06	9.74e-05	Multiple_Complex
TC0600007307.hg.1	butyrophilin, subfamily 2, member A1	BTN2A1	2.85	9.95	8.44	0.4	0.5	T	T	2.91e-07	3.27e-05	Multiple_Complex
TC0800009971.hg.1	scavenger receptor class A, member 5	SCARA5	2.84	6.05	4.55	0.71	0.23	T	T	0.0003	0.0093	Coding
TC1400006896.hg.1	ribosomal protein L9 pseudogene 3	RPL9P3	2.84	9.9	8.4	0.36	0.61	T	T	3.21e-05	0.0015	Multiple_Complex
TC0300011754.hg.1	protein S (beta) pseudogene	PROS2P	2.84	5.93	4.43	0.54	0.62	T	T	0.0255	0.2025	Multiple_Complex
TC1700009903.hg.1	zinc finger protein 624	ZNF624	2.84	8.15	6.64	0.66	0.86	T	T	0.0487	0.2958	Multiple_Complex
TC1300007707.hg.1	glypican 5	GPC5	2.84	6.19	4.68	0.19	0.47	T	F	0.0033	0.0509	Multiple_Complex
TC1500010240.hg.1	golgin A2 pseudogene 10	GOLGA2P10	2.84	10.87	9.36	0.37	0.25	T	T	0.0006	0.0143	Multiple_Complex
TC0100009760.hg.1	nudix hydrolase 4 pseudogene 1; nudix hydrolase 4 pseudogene 2; nudix hydrolase 4	NUDT4P1; NUDT4P2; NUDT4	2.84	16.3	14.79	0.18	0.27	T	T	0.0002	0.0067	Multiple_Complex
TC0100009833.hg.1	nudix hydrolase 4; nudix hydrolase 4 pseudogene 1	NUDT4; NUDT4P1	2.84	16.3	14.79	0.18	0.27	T	T	0.0002	0.0067	Multiple_Complex
TC0800007367.hg.1	ADAM metallopeptidase domain 9	ADAM9	2.84	8.89	7.38	0.81	0.51	T	T	0.0012	0.025	Multiple_Complex
TC1700012228.hg.1	leucine rich repeat containing 37B	LRRC37B	2.84	10.98	9.48	0.37	0.48	T	T	0.0014	0.0271	Multiple_Complex
TC0900009933.hg.1	family with sequence similarity 214, member B	FAM214B	2.84	7.31	5.8	0.43	0.57	T	T	2.38e-05	0.0011	Multiple_Complex
TC1700007858.hg.1	FK506 binding protein 10	FKBP10	2.84	13.48	11.98	0.23	0.19	T	T	2.53e-05	0.0012	Multiple_Complex
TC1100012219.hg.1	solute carrier family 35, member F2	SLC35F2	2.84	12.99	11.48	0.29	0.48	T	T	1.03e-05	0.0006	Multiple_Complex
TC0500013229.hg.1	chromosome 5 open reading frame 24	C5orf24	2.84	10.2	8.7	0.47	0.48	T	T	0.0002	0.0052	Multiple_Complex
TC0400008376.hg.1	SEC24 homolog B, COPII coat complex component	SEC24B	2.83	12.76	11.26	0.83	0.21	T	T	0.0032	0.0507	Multiple_Complex
TC1800008628.hg.1	zinc finger and BTB domain containing 7C	ZBTB7C	2.83	7	5.5	0.37	0.46	T	T	0.0003	0.0092	Multiple_Complex
TC1200009580.hg.1	F-box and leucine-rich repeat protein 14	FBXL14	2.83	11.38	9.88	0.21	0.67	T	T	0.0038	0.0571	Multiple_Complex
TC0500008894.hg.1	RNA, 7SL, cytoplasmic 68, pseudogene [Source:HGNC Symbol;Acc:HGNC:46084]	RN7SL68P; AC008781.1	2.83	8.22	6.72	0.07	0.18	T	T	1.88e-06	0.0001	Multiple_Complex
TC2100007474.hg.1	protein arginine methyltransferase 2	PRMT2	2.82	10.56	9.06	0.23	0.67	T	T	2.28e-05	0.0011	Multiple_Complex
TC0700012998.hg.1	zinc finger family member 767, pseudogene	ZNF767P	2.82	9.72	8.22	0.27	0.26	T	T	0.0001	0.004	Multiple_Complex
TC1500007294.hg.1	unc-13 homolog C (C. elegans)	UNC13C	2.82	5.24	3.74	0.78	0.36	T	F	0.0003	0.0082	Multiple_Complex
TC1900006646.hg.1	GIPC PDZ domain containing family, member 3	GIPC3	2.82	6.93	5.43	0.05	0.41	T	T	2.92e-05	0.0013	Multiple_Complex
TC0300013852.hg.1	ST3 beta-galactoside alpha-2,3-sialyltransferase 6	ST3GAL6	2.82	10.91	9.42	0.23	0.48	T	T	3.72e-05	0.0016	Multiple_Complex
TC0X00007378.hg.1	MAGE family member H1	MAGEH1	2.82	9.3	7.81	0.37	0.11	T	T	0.0003	0.0094	Coding
TC0400010282.hg.1	sel-1 suppressor of lin-12-like 3 (C. elegans)	SEL1L3	2.82	13.83	12.33	0.69	0.61	T	T	0.0054	0.0725	Multiple_Complex
TC2200008055.hg.1	phosphatidylinositol 4-kinase, catalytic, alpha	PI4KA	2.82	12.95	11.45	0.35	0.49	T	T	0.0074	0.0899	Multiple_Complex
TC0900010910.hg.1	solute carrier family 35 (UDP-GlcNAc/UDP-glucose transporter), member D2	SLC35D2	2.82	10.62	9.12	0.88	0.54	T	T	3.98e-05	0.0017	Multiple_Complex
TC1100012121.hg.1	transmembrane protein 123	TMEM123	2.82	16.34	14.85	0.39	0.71	T	T	0.0039	0.058	Multiple_Complex
TC0100015309.hg.1		RP3-522D1.2	2.81	12.82	11.33	0.1	0.51	T	T	0.0003	0.0077	Multiple_Complex
TC1100011587.hg.1	family with sequence similarity 168, member A	FAM168A	2.81	7.07	5.58	1.06	0.25	T	T	0.002	0.0362	Multiple_Complex
TC0200013109.hg.1	polycomb group ring finger 1	PCGF1	2.81	9.67	8.18	0.03	0.4	T	T	0.0074	0.0893	Multiple_Complex
TC0100017988.hg.1	fatty acid binding protein 7, brain pseudogene 1 [Source:HGNC Symbol;Acc:HGNC:41951]	FABP7P1	2.81	5.71	4.22	0.18	0.55	T	T	0.0066	0.0828	Multiple_Complex
TC0700010926.hg.1	transmembrane p24 trafficking protein 4	TMED4	2.81	10.45	8.96	0.36	0.6	T	T	0.0011	0.0235	Multiple_Complex
TC0200008005.hg.1	dysferlin	DYSF	2.81	6.59	5.1	0.43	0.32	T	T	2.34e-05	0.0011	Multiple_Complex
TC2200008799.hg.1	suppression of tumorigenicity 13 (colon carcinoma) (Hsp70 interacting protein)	ST13	2.81	16.02	14.54	0.17	0.14	T	T	2.17e-05	0.0011	Multiple_Complex
TC1800008978.hg.1	rotatin	RTTN	2.8	10.46	8.98	0.69	0.18	T	T	0.0055	0.0729	Multiple_Complex
TC0400012759.hg.1	family with sequence similarity 193, member A	FAM193A	2.8	11.51	10.02	0.34	0.58	T	T	4e-05	0.0017	Multiple_Complex
TC0500012299.hg.1	protocadherin 12	PCDH12	2.8	5.76	4.27	0.56	0.23	T	T	2.42e-06	0.0002	Multiple_Complex
TC1300007161.hg.1	cytidine and dCMP deaminase domain containing 1	CDADC1	2.8	9.72	8.24	0.45	0.62	T	T	3.58e-06	0.0002	Multiple_Complex
TC0800011124.hg.1	ribosomal protein L34 pseudogene 18 [Source:HGNC Symbol;Acc:HGNC:35968]	RPL34P18	2.8	14.67	13.19	0.28	0.13	T	T	0.0003	0.0094	Multiple_Complex
TC0100011267.hg.1	ATPase, Ca++ transporting, plasma membrane 4	ATP2B4	2.8	12.09	10.61	0.57	0.81	T	T	3.86e-05	0.0017	Multiple_Complex
TC1500007379.hg.1	family with sequence similarity 63, member B	FAM63B	2.8	10.42	8.93	0.77	0.96	T	T	0.0148	0.1433	Multiple_Complex
TC1000010914.hg.1	pyrophosphatase (inorganic) 1	PPA1	2.8	13.91	12.43	0.36	0.21	T	T	0.0005	0.0134	Multiple_Complex
TC1800007922.hg.1	ribosomal protein L21 pseudogene 127	RPL21P127	2.79	9.72	8.24	0.19	0.15	T	T	0.0007	0.0154	Multiple_Complex
TC0100016952.hg.1	ubiquitin conjugating enzyme E2T	UBE2T	2.79	14.48	13	0.55	0.18	T	T	1.69e-05	0.0009	Multiple_Complex
TC0300006791.hg.1	K(lysine) acetyltransferase 2B	KAT2B	2.79	6.45	4.98	0.12	0.58	T	T	0.001	0.0205	Multiple_Complex
TC1000012580.hg.1	Rho GTPase activating protein 19	ARHGAP19	2.79	14.18	12.7	0.5	0.45	T	T	0.0003	0.0094	Multiple_Complex
TC0X00009341.hg.1	dystrophin	DMD	2.78	10.58	9.11	0.69	0.69	T	T	0.0037	0.0555	Multiple_Complex
TC0100014505.hg.1	solute carrier family 35 (UDP-GlcA/UDP-GalNAc transporter), member D1	SLC35D1	2.78	9.06	7.59	0.2	0.24	T	T	1.12e-05	0.0006	Multiple_Complex
TC0100017815.hg.1	translocase of outer mitochondrial membrane 20 homolog (yeast)	TOMM20	2.78	13.77	12.3	0.39	0.53	T	T	0.0049	0.0674	Multiple_Complex
TC0100010855.hg.1	N-acetylneuraminate pyruvate lyase (dihydrodipicolinate synthase)	NPL	2.78	6.83	5.36	0.35	0.5	T	T	0.0017	0.0322	Multiple_Complex
TC1200009972.hg.1	G protein-coupled receptor 19	GPR19	2.78	12.15	10.68	0.27	0.44	T	T	2.67e-05	0.0013	Multiple_Complex
TC0200012804.hg.1	vacuolar protein sorting 54 homolog (S. cerevisiae)	VPS54	2.77	8.85	7.38	0.49	0.59	T	T	0.0037	0.0556	Multiple_Complex
TC1000009025.hg.1	empty spiracles homeobox 2	EMX2	2.77	6.12	4.65	0.88	0.41	T	F	0.0225	0.1877	Multiple_Complex
TC0300006758.hg.1	phospholipase C-like 2; microRNA 3714	PLCL2; MIR3714	2.77	8.87	7.4	0.34	0.32	T	T	0.004	0.0583	Multiple_Complex
TC0200015888.hg.1		AC073052.1	2.77	5.54	4.07	0.94	0.26	T	T	0.0022	0.0381	Multiple_Complex
TC0900011163.hg.1	protein tyrosine phosphatase, non-receptor type 3	PTPN3	2.77	8.18	6.71	0.63	0.79	T	T	0.0086	0.0993	Multiple_Complex
TC0200009991.hg.1		RP11-1O7.1	2.77	10.38	8.91	0.23	0.74	T	T	0.0023	0.0398	Multiple_Complex
TC0100016016.hg.1	nestin	NES	2.77	11.23	9.76	0.13	0.05	T	T	3.91e-05	0.0017	Multiple_Complex
TC0600011661.hg.1	serine/threonine kinase 38	STK38	2.77	12.35	10.88	0.52	0.22	T	T	5.48e-06	0.0003	Multiple_Complex
TC0200011919.hg.1	lipid droplet associated hydrolase	LDAH	2.77	11.53	10.06	0.8	0.93	T	T	0.0029	0.0461	Multiple_Complex
TC0300006840.hg.1	ubiquitin conjugating enzyme E2E 1	UBE2E1	2.76	13.97	12.51	0.04	0.34	T	T	0.0003	0.0079	Multiple_Complex
TC0100018201.hg.1	mitochondrial fission regulator 1-like	MTFR1L	2.76	9.91	8.44	0.44	0.83	T	T	1.58e-06	0.0001	Multiple_Complex
TC1200008211.hg.1		RP11-274M17.2	2.76	7.72	6.26	0.24	0.26	T	T	0.0002	0.0063	Multiple_Complex
TC1400009967.hg.1	tetratricopeptide repeat domain 7B	TTC7B	2.76	10.07	8.6	0.47	0.74	T	T	0.026	0.2046	Multiple_Complex
TC1000011969.hg.1	family with sequence similarity 204, member A	FAM204A	2.76	11.79	10.33	0.29	0.87	T	T	0.0009	0.0189	Multiple_Complex
TC2100008555.hg.1	T-cell lymphoma invasion and metastasis 1	TIAM1	2.76	10.27	8.8	0.37	0.76	T	T	6.62e-06	0.0004	Multiple_Complex
TC0900007010.hg.1	ubiquitin-conjugating enzyme E2R 2	UBE2R2	2.76	13.75	12.28	0.48	0.46	T	T	0.0001	0.0038	Multiple_Complex
TC2000008345.hg.1	thioredoxin-related transmembrane protein 4	TMX4	2.75	8.54	7.08	0.26	0.53	T	T	0.0013	0.0256	Multiple_Complex
TC0400012969.hg.1	SET domain containing (lysine methyltransferase) 7	SETD7	2.75	8.2	6.74	0.14	0.33	T	T	1.48e-05	0.0008	Multiple_Complex
TC1000010993.hg.1	mitochondrial calcium uptake 1	MICU1	2.75	12.39	10.93	0.41	0.37	T	T	0.0004	0.0113	Multiple_Complex
TC1200008466.hg.1	nudix hydrolase 4	NUDT4	2.75	16.03	14.58	0.15	0.28	T	T	8.74e-06	0.0005	Multiple_Complex
TC0300006993.hg.1	cartilage associated protein	CRTAP	2.75	17.74	16.28	0.32	0.14	T	T	0.0002	0.0052	Multiple_Complex
TC1200008675.hg.1	thioredoxin reductase 1	TXNRD1	2.75	14.13	12.67	0.46	0.31	T	T	0.0007	0.0158	Multiple_Complex
TC0300010320.hg.1		RP11-715I4.1	2.74	12.62	11.16	0.23	0.65	T	T	0.0058	0.0763	Multiple_Complex
TC0700007834.hg.1	RNA, U6 small nuclear 313, pseudogene [Source:HGNC Symbol;Acc:HGNC:47276]	RNU6-313P	2.74	5.76	4.3	0.74	0.67	T	F	0.0216	0.1826	Multiple_Complex
TC1000008044.hg.1	glutamate dehydrogenase 1 pseudogene 3	GLUD1P3	2.74	16.11	14.65	0.53	0.13	T	T	3.41e-07	3.69e-05	Multiple_Complex
TC0400010418.hg.1	RELT-like 1	RELL1	2.74	13.23	11.78	0.87	0.26	T	T	2.56e-06	0.0002	Multiple_Complex
TC0600011912.hg.1	solute carrier family 35 (adenosine 3-phospho 5-phosphosulfate transporter), member B2; microRNA 4647	SLC35B2; MIR4647	2.74	13.7	12.25	0.74	0.24	T	T	0.0002	0.0058	Multiple_Complex
TC1700011369.hg.1	mediator complex subunit 13	MED13	2.74	13.89	12.44	0.6	0.52	T	T	0.0047	0.0656	Multiple_Complex
TC0200012404.hg.1	ZFP36 ring finger protein-like 2	ZFP36L2	2.73	13.57	12.12	0.9	0.19	T	T	0.0018	0.0335	Multiple_Complex
TC0X00008360.hg.1	mitochondrially encoded NADH:ubiquinone oxidoreductase core subunit 4 pseudogene 24 [Source:HGNC Symbol;Acc:HGNC:42220]; MT-CO1 pseudogene 53 [Source:HGNC Symbol;Acc:HGNC:52118]	MTND4P24; MTCO1P53	2.73	12.46	11.01	0.74	0.64	T	T	0.0138	0.1366	Multiple_Complex
TC1100010274.hg.1	SPT2 chromatin protein domain containing 1	SPTY2D1	2.73	9.6	8.15	0.36	0.53	T	T	3.91e-05	0.0017	Multiple_Complex
TC2000009027.hg.1	ribosomal protein S3A pseudogene 3	RPS3AP3	2.73	6.95	5.5	0.43	0.26	T	T	0.0005	0.0131	Multiple_Complex
TC0900009909.hg.1	dynactin 3 (p22)	DCTN3	2.73	9.32	7.88	0.58	0.06	T	T	0.0001	0.0037	Multiple_Complex
TC2000008801.hg.1		RP5-854E16.2	2.73	8.11	6.66	0.22	0.41	T	T	4.17e-06	0.0003	Multiple_Complex
TC0900008969.hg.1	ABL proto-oncogene 1, non-receptor tyrosine kinase	ABL1	2.72	12.8	11.35	0.2	0.44	T	T	0.0004	0.0096	Multiple_Complex
TC0200013280.hg.1		AC016753.2	2.72	12.13	10.69	0.11	0.18	T	T	0.0011	0.0233	Coding
TC1700010845.hg.1		RP11-1072C15.1	2.72	6.64	5.19	0.53	0.22	T	T	0.0026	0.0437	Multiple_Complex
TC0300012132.hg.1	glycogen synthase kinase 3 beta	GSK3B	2.72	14.46	13.01	0.3	0.33	T	T	0.0002	0.0052	Multiple_Complex
TC1900007267.hg.1	adaptor-related protein complex 1, mu 1 subunit	AP1M1	2.72	11.26	9.82	0.57	0.16	T	T	2.7e-05	0.0013	Multiple_Complex
TC1100011549.hg.1	paired-like homeobox 2a	PHOX2A	2.72	4.58	3.14	0.94	0.24	T	F	0.0227	0.1883	Multiple_Complex
TC0300010722.hg.1	leucine rich repeat (in FLII) interacting protein 2	LRRFIP2	2.72	12.12	10.68	0.3	0.25	T	T	2.06e-05	0.001	Multiple_Complex
TC0700010558.hg.1	homeobox A2	HOXA2	2.72	4.34	2.9	0.39	0.59	T	F	0.0247	0.1988	Multiple_Complex
TC0200016452.hg.1	v-rel avian reticuloendotheliosis viral oncogene homolog	REL	2.72	10.65	9.2	0.47	0.32	T	T	0.0007	0.0164	Multiple_Complex
TC0900008716.hg.1	NIMA-related kinase 6	NEK6	2.72	10.66	9.22	0.38	0.09	T	T	0.0003	0.0076	Multiple_Complex
TC1900007384.hg.1	growth differentiation factor 15	GDF15	2.71	6.12	4.68	1.34	0.24	T	T	0.0004	0.0113	Multiple_Complex
TC2000009071.hg.1	small nucleolar RNA, H/ACA box 71B	SNORA71B	2.71	8.41	6.97	0.63	0.33	T	T	0.0009	0.019	Multiple_Complex
TC1200010793.hg.1	cysteine sulfinic acid decarboxylase	CSAD	2.71	8.15	6.71	0.04	0.37	T	T	0.0003	0.0083	Multiple_Complex
TC0200016447.hg.1	acylphosphatase 2, muscle type	ACYP2	2.71	7.01	5.57	0.04	0.65	T	T	0.0007	0.0163	Multiple_Complex
TC0800011216.hg.1	serine/threonine kinase 3	STK3	2.71	13.51	12.07	0.44	0.37	T	T	2.35e-05	0.0011	Multiple_Complex
TC0500007697.hg.1		RP11-589F5.4	2.71	13.61	12.18	0.4	0.31	T	T	0.0002	0.0053	Multiple_Complex
TC2200009345.hg.1	C1q and tumor necrosis factor related protein 6	C1QTNF6	2.71	8.02	6.58	0.35	0.03	T	T	3.17e-05	0.0014	Multiple_Complex
TC0200015019.hg.1	KIAA1715	KIAA1715	2.71	9.33	7.89	0.67	1.14	T	T	0.0018	0.0336	Multiple_Complex
TC1100008382.hg.1	Rho guanine nucleotide exchange factor 17	ARHGEF17	2.71	6.13	4.69	0.48	0.45	T	T	0.0006	0.0142	Multiple_Complex
TC0500007910.hg.1		CTC-512J14.1	2.71	8.4	6.97	0.51	0.33	T	T	0.0005	0.012	Multiple_Complex
TC1000008961.hg.1	NHL repeat containing 2	NHLRC2	2.71	12.63	11.2	0.3	0.92	T	T	0.008	0.0949	Multiple_Complex
TC1000009092.hg.1	inositol polyphosphate-5-phosphatase F	INPP5F	2.71	16.72	15.29	0.36	0.78	T	T	0.0011	0.023	Multiple_Complex
TC0900008851.hg.1	dynamin 1	DNM1	2.71	12.49	11.06	0.23	0.14	T	T	8.96e-05	0.0033	Multiple_Complex
TC0800008352.hg.1	vacuolar protein sorting 13 homolog B (yeast)	VPS13B	2.71	12.54	11.1	0.85	0.58	T	T	0.0025	0.0419	Multiple_Complex
TC0200016682.hg.1	protein phosphatase 3, regulatory subunit B, alpha	PPP3R1	2.71	13.75	12.32	0.27	0.52	T	T	1.76e-05	0.0009	Coding
TC0100014050.hg.1	leucine rich repeat containing 41	LRRC41	2.7	12.59	11.16	0.67	0.14	T	T	0.0029	0.0473	Multiple_Complex
TC0100009731.hg.1	RNA, variant U1 small nuclear 14	RNVU1-14	2.7	14.39	12.95	0.51	0.66	T	T	0.0083	0.0968	Multiple_Complex
TC1200007701.hg.1	zinc finger protein 740	ZNF740	2.7	10.39	8.95	0.34	0.22	T	T	4.26e-06	0.0003	Multiple_Complex
TC0100018472.hg.1	SEC22 homolog B, vesicle trafficking protein (gene/pseudogene)	SEC22B	2.7	12.91	11.47	0.32	0.4	T	T	4.92e-06	0.0003	Multiple_Complex
TC1600008276.hg.1	small nucleolar RNA, C/D box 111B	SNORD111B	2.7	8.03	6.6	0.31	0.3	T	T	0.0032	0.0504	Multiple_Complex
TC1000008045.hg.1	SEC24 homolog C, COPII coat complex component	SEC24C	2.7	11.02	9.59	0.07	0.2	T	T	9.37e-05	0.0034	Multiple_Complex
TC2000007219.hg.1	ERGIC and golgi 3	ERGIC3	2.7	14.88	13.45	0.33	0.08	T	T	1.69e-05	0.0009	Multiple_Complex
TC2000008828.hg.1	p53 and DNA-damage regulated 1	PDRG1	2.69	8.62	7.19	0.39	0.16	T	T	8.57e-05	0.0032	Multiple_Complex
TC1200007966.hg.1	ribosomal protein L32 pseudogene 26	RPL32P26	2.69	11.42	9.99	0.29	0.45	T	T	0.0012	0.0236	Multiple_Complex
TC0700010899.hg.1	polymerase (RNA) II (DNA directed) polypeptide J4, pseudogene	POLR2J4	2.68	7.46	6.03	0.44	0.04	T	T	4.67e-05	0.002	Multiple_Complex
TC0500013106.hg.1	mannosyl (alpha-1,3-)-glycoprotein beta-1,2-N-acetylglucosaminyltransferase	MGAT1	2.68	7.53	6.1	0.88	0.35	T	T	0.0007	0.0164	Multiple_Complex
TC2200009328.hg.1	Hermansky-Pudlak syndrome 4	HPS4	2.68	12.58	11.15	0.13	0.68	T	T	0.0005	0.0119	Multiple_Complex
TC0500007684.hg.1	Salzman2013 ANNOTATED, INTERNAL, ncRNA, OVERLAPTX, OVEXON best transcript TCONS_l2_00023407	TCONS_l2_00023407	2.68	8.75	7.33	1.03	0.4	T	T	0.0167	0.1554	Multiple_Complex
TC0600007675.hg.1	bromodomain containing 2	BRD2	2.68	14.04	12.62	0.21	0.14	T	T	3.94e-08	6.15e-06	Multiple_Complex
TC0400012989.hg.1	transmembrane protein 192	TMEM192	2.68	11.18	9.76	0.22	0.72	T	T	1.25e-05	0.0007	Multiple_Complex
TC0300012245.hg.1	zinc finger protein 148	ZNF148	2.68	12.53	11.1	0.29	0.69	T	T	0.0016	0.03	Multiple_Complex
TC1300007312.hg.1	protocadherin 17	PCDH17	2.68	7.98	6.56	0.49	0.45	T	T	0.0104	0.1131	Coding
TC0800012299.hg.1	hook microtubule-tethering protein 3	HOOK3	2.67	10.8	9.38	0.47	0.25	T	T	0.0004	0.0102	Multiple_Complex
TC1600011375.hg.1	quinolinate phosphoribosyltransferase	QPRT	2.67	11.73	10.32	0.96	0.63	T	T	0.005	0.0682	Multiple_Complex
TC0500008202.hg.1	family with sequence similarity 174, member A	FAM174A	2.67	9.34	7.92	0.16	0.43	T	T	0.0002	0.0073	Multiple_Complex
TC0100009418.hg.1	RAP1A, member of RAS oncogene family	RAP1A	2.67	12.39	10.97	0.15	0.82	T	T	0.0011	0.0233	Multiple_Complex
TC0500007077.hg.1	natriuretic peptide receptor 3	NPR3	2.67	7.06	5.64	0.56	0.49	T	F	0.0475	0.2914	Multiple_Complex
TC0100013924.hg.1	ELOVL fatty acid elongase 1; microRNA 6734	ELOVL1; MIR6734	2.67	10.79	9.37	0.49	0.59	T	T	0.002	0.0356	Multiple_Complex
TC0X00007107.hg.1	KRAB box domain containing 4	KRBOX4	2.67	9.96	8.54	0.34	0.66	T	T	0.0014	0.0277	Multiple_Complex
TC2000009997.hg.1	dual specificity phosphatase 15	DUSP15	2.67	7.74	6.33	0.44	0.22	T	T	2.54e-05	0.0012	Multiple_Complex
TC1700012194.hg.1	zinc finger protein 286A	ZNF286A	2.67	10.37	8.95	0.29	0.21	T	T	0.0001	0.0039	Multiple_Complex
TC1100009059.hg.1		AP002884.1	2.66	12.91	11.5	0.87	0.35	T	T	0.0036	0.0546	Multiple_Complex
TC1700007042.hg.1	myosin phosphatase Rho interacting protein	MPRIP	2.66	14.95	13.53	0.09	0.23	T	T	2.28e-06	0.0002	Multiple_Complex
TC0700009807.hg.1	insulin induced gene 1	INSIG1	2.66	12.04	10.63	0.57	0.49	T	T	0.0048	0.0664	Multiple_Complex
TC0100013458.hg.1	EYA transcriptional coactivator and phosphatase 3	EYA3	2.66	10.08	8.67	0.38	0.7	T	T	0.0009	0.0193	Multiple_Complex
TC0100013432.hg.1	WAS protein family, member 2	WASF2	2.66	13.95	12.54	0.55	0.15	T	T	0.001	0.0205	Multiple_Complex
TC1000008995.hg.1	attractin-like 1	ATRNL1	2.66	11.85	10.44	0.37	0.33	T	T	0.0023	0.039	Multiple_Complex
TC0100007784.hg.1	argonaute RISC catalytic component 4	AGO4	2.66	9.23	7.82	0.17	0.53	T	T	0.0001	0.0037	Multiple_Complex
TC1200008322.hg.1	transmembrane and tetratricopeptide repeat containing 2	TMTC2	2.66	8.01	6.6	0.14	0.37	T	T	5.06e-06	0.0003	Multiple_Complex
TC1600011494.hg.1	ADP-ribosylation factor like GTPase 6 interacting protein 1	ARL6IP1	2.66	14.78	13.37	0.63	0.74	T	T	0.02	0.1744	Multiple_Complex
TC1100013205.hg.1	ArfGAP with RhoGAP domain, ankyrin repeat and PH domain 1	ARAP1	2.66	8.45	7.04	0.21	0.22	T	T	6.21e-05	0.0025	Multiple_Complex
TC0X00009942.hg.1	praja ring finger 1, E3 ubiquitin protein ligase	PJA1	2.65	10.58	9.17	0.55	0.36	T	T	0.0004	0.0096	Multiple_Complex
TC0X00008052.hg.1	chromosome X open reading frame 57	CXorf57	2.65	8.99	7.58	0.4	0.34	T	T	0.0006	0.0137	Multiple_Complex
TC0700006775.hg.1	ribosomal protein L36a pseudogene 29 [Source:HGNC Symbol;Acc:HGNC:36897]	RPL36AP29	2.65	6.93	5.52	0.34	0.71	T	T	0.0148	0.1432	Multiple_Complex
TC1500007091.hg.1	CTD small phosphatase like 2	CTDSPL2	2.65	13.9	12.49	0.7	0.93	T	T	0.0094	0.1057	Multiple_Complex
TC1200012575.hg.1	dual specificity tyrosine-(Y)-phosphorylation regulated kinase 4	DYRK4	2.65	8.6	7.19	0.14	0.5	T	T	0.0003	0.0079	Multiple_Complex
TC1800008655.hg.1	dymeclin	DYM	2.65	14.35	12.95	0.36	0.39	T	T	1.76e-05	0.0009	Multiple_Complex
TC1600011417.hg.1	nuclear factor of activated T-cells, cytoplasmic, calcineurin-dependent 3	NFATC3	2.65	14.64	13.23	0.24	0.33	T	T	2.42e-05	0.0012	Multiple_Complex
TC1000008556.hg.1	ligand dependent nuclear receptor corepressor	LCOR	2.65	11.1	9.7	0.43	0.52	T	T	0.0081	0.0951	Multiple_Complex
TC0100015454.hg.1	ribosomal protein L6 pseudogene 2 [Source:HGNC Symbol;Acc:HGNC:35964]	RPL6P2	2.65	9.09	7.68	0.59	0.35	T	T	0.0036	0.0548	Multiple_Complex
TC0100013897.hg.1	prolyl 3-hydroxylase 1	P3H1	2.65	13.07	11.67	0.5	0.27	T	T	0.0021	0.0367	Multiple_Complex
TC1700011558.hg.1	solute carrier family 16, member 6	SLC16A6	2.65	5.98	4.58	0.41	0.07	T	T	0.0001	0.0043	Multiple_Complex
TC0300013829.hg.1	RNA binding motif protein 5	RBM5	2.65	14.26	12.86	0.25	0.5	T	T	4.6e-05	0.0019	Multiple_Complex
TC2200007468.hg.1	thyrotrophic embryonic factor	TEF	2.65	7.73	6.32	0.63	0.06	T	T	2.2e-05	0.0011	Multiple_Complex
TC0800007127.hg.1	elongator acetyltransferase complex subunit 3	ELP3	2.65	13.83	12.42	0.12	0.22	T	T	6.47e-05	0.0026	Multiple_Complex
TC1200011886.hg.1		RP1-7G5.5	2.64	6.02	4.61	0.43	0.61	T	F	0.0198	0.1728	Multiple_Complex
TC1700009402.hg.1	SET and MYND domain containing 4	SMYD4	2.64	10.9	9.5	0.37	0.57	T	T	0.0005	0.0123	Multiple_Complex
TC1900009204.hg.1	MOB kinase activator 3A	MOB3A	2.64	8.5	7.1	0.93	0.48	T	T	0.0157	0.149	Multiple_Complex
TC0800012313.hg.1	serum/glucocorticoid regulated kinase family, member 3; C8orf44-SGK3 readthrough	SGK3; C8orf44-SGK3	2.64	8.68	7.28	1.35	0.17	T	T	0.0018	0.033	Multiple_Complex
TC0200009346.hg.1	POTE ankyrin domain family, member K, pseudogene	POTEKP	2.64	5.44	4.04	0.29	0.06	T	F	0.0001	0.0038	Multiple_Complex
TC0700008690.hg.1	lysine (K)-specific methyltransferase 2E	KMT2E	2.64	12.91	11.51	0.46	0.51	T	T	0.0152	0.1456	Multiple_Complex
TC1900011755.hg.1	zinc finger protein 226	ZNF226	2.64	9.59	8.19	0.24	0.62	T	T	0.0275	0.2119	Multiple_Complex
TC0300013930.hg.1	ssu-2 homolog (C. elegans)	SSUH2	2.64	5.33	3.93	0.51	0.3	T	F	1.11e-05	0.0006	Multiple_Complex
TC1200009740.hg.1	intermediate filament family orphan 1	IFFO1	2.64	7.64	6.25	0.32	0.25	T	T	3.85e-05	0.0017	Multiple_Complex
TC1900009335.hg.1	eukaryotic translation initiation factor 1 pseudogene 6 [Source:HGNC Symbol;Acc:HGNC:49619]	EIF1P6	2.64	8.46	7.06	0.15	0.35	T	T	6.94e-05	0.0027	Multiple_Complex
TC1700011532.hg.1	microRNA 548d-2	MIR548D2	2.64	9.91	8.51	0.37	0.42	T	T	0.0002	0.0049	Multiple_Complex
TC0900012157.hg.1	A kinase (PRKA) anchor protein 2	AKAP2	2.64	11.51	10.12	0.49	0.25	T	T	0.0104	0.1134	Multiple_Complex
TC2000007283.hg.1	SRC proto-oncogene, non-receptor tyrosine kinase	SRC	2.63	12.25	10.86	0.35	0.28	T	T	0.0001	0.0037	Multiple_Complex
TC1200011135.hg.1	RNA binding motif, single stranded interacting protein 1 pseudogene 1 [Source:HGNC Symbol;Acc:HGNC:9908]	RBMS1P1	2.63	9.88	8.48	0.31	0.29	T	T	0.0004	0.0099	Multiple_Complex
TC0800008299.hg.1	syndecan 2	SDC2	2.63	14.18	12.78	0.31	0.51	T	T	0.0093	0.1052	Multiple_Complex
TC0X00009773.hg.1	PHD finger protein 8	PHF8	2.63	9.91	8.52	0.32	0.68	T	T	0.002	0.0364	Multiple_Complex
TC2000006503.hg.1	ribosomal protein L7 pseudogene 2	RPL7P2	2.63	8.19	6.79	0.68	0.27	T	T	0.019	0.1684	Multiple_Complex
TC0100006822.hg.1	peroxisomal biogenesis factor 14	PEX14	2.63	10.73	9.34	0.41	0.09	T	T	2.04e-07	2.43e-05	Multiple_Complex
TC1900008507.hg.1	ferritin, light polypeptide	FTL	2.63	17.29	15.89	0.45	0.22	T	T	0.0027	0.0442	Multiple_Complex
TC0600013794.hg.1	1-acylglycerol-3-phosphate O-acyltransferase 4	AGPAT4	2.63	11.56	10.17	0.24	0.13	T	T	5.75e-05	0.0023	Multiple_Complex
TC2100008506.hg.1	MORC family CW-type zinc finger 3	MORC3	2.63	11.78	10.38	0.4	0.7	T	T	0.0024	0.0409	Multiple_Complex
TC0100015885.hg.1	GATA zinc finger domain containing 2B	GATAD2B	2.63	13.21	11.81	0.32	0.12	T	T	0.0003	0.0077	Multiple_Complex
TC1400010171.hg.1	coiled-coil domain containing 85C	CCDC85C	2.63	7.81	6.42	0.73	0.27	T	T	0.0073	0.0889	Multiple_Complex
TC0900008641.hg.1	DAB2 interacting protein	DAB2IP	2.63	8.65	7.26	0.78	0.19	T	T	0.0001	0.0037	Multiple_Complex
TC0600009262.hg.1	solute carrier family 35, member F1	SLC35F1	2.62	12.14	10.75	0.08	0.46	T	T	0.0058	0.0759	Coding
TC2000008473.hg.1	kinesin family member 16B	KIF16B	2.62	9.8	8.41	0.53	0.28	T	T	0.0018	0.0337	Multiple_Complex
TC1100009287.hg.1	Rho guanine nucleotide exchange factor (GEF) 12	ARHGEF12	2.62	11.88	10.49	1.09	0.4	T	T	0.0063	0.0806	Multiple_Complex
TC1000010006.hg.1	DnaJ (Hsp40) homolog, subfamily C, member 1	DNAJC1	2.62	11.88	10.49	0.17	0.53	T	T	2.91e-05	0.0013	Multiple_Complex
TC0900011631.hg.1	golgin A2	GOLGA2	2.62	10.95	9.56	0.41	0.19	T	T	0.0036	0.0541	Multiple_Complex
TC0100013800.hg.1	hes-related family bHLH transcription factor with YRPW motif-like	HEYL	2.62	8.62	7.23	0.53	0.58	T	T	0.0004	0.0112	Coding
TC1100013145.hg.1	coatomer protein complex subunit beta 1	COPB1	2.62	13.08	11.69	0.62	0.55	T	T	0.0068	0.0843	Multiple_Complex
TC1700010548.hg.1	CWC25 spliceosome-associated protein homolog	CWC25	2.62	8.01	6.62	0.2	0.76	T	T	3.51e-05	0.0016	Multiple_Complex
TC0500007585.hg.1	ring finger protein 180	RNF180	2.61	8.32	6.94	0.86	1.09	T	T	0.0191	0.1689	Coding
TC0100010369.hg.1	activating transcription factor 6	ATF6	2.61	12.57	11.19	0.31	0.2	T	T	4.04e-05	0.0018	Multiple_Complex
TC0900011998.hg.1	small nucleolar RNA, H/ACA box 17A; small nucleolar RNA, H/ACA box 17B; small nucleolar RNA host gene 7	SNORA17A; SNORA17B; SNHG7	2.61	10.01	8.63	0.12	0.31	T	T	0.0004	0.0113	Multiple_Complex
TC0700011556.hg.1	huntingtin interacting protein 1	HIP1	2.61	11.54	10.16	0.13	0.13	T	T	8.29e-05	0.0031	Multiple_Complex
TC1700007716.hg.1	myeloid/lymphoid or mixed-lineage leukemia; translocated to, 6	MLLT6	2.61	6.36	4.98	0.25	0.63	T	T	0.0008	0.0184	Multiple_Complex
TC1400008557.hg.1	POTE ankyrin domain family, member G; POTE ankyrin domain family, member M	POTEG; POTEM	2.61	6.49	5.11	0.3	0.25	T	T	0.0021	0.0368	Multiple_Complex
TC0100011533.hg.1	activating transcription factor 3	ATF3	2.61	9.68	8.3	1.55	0.29	T	T	0.0295	0.2206	Multiple_Complex
TC2200007138.hg.1	F-box protein 7	FBXO7	2.61	16.36	14.98	0.54	0.44	T	T	9.48e-05	0.0034	Multiple_Complex
TC0400010715.hg.1	cysteine rich hydrophobic domain 2	CHIC2	2.61	8.19	6.8	0.04	0.39	T	T	2.02e-07	2.41e-05	Multiple_Complex
TC1700010565.hg.1	F-box and leucine-rich repeat protein 20	FBXL20	2.6	10.43	9.05	0.36	0.45	T	T	0.0002	0.0061	Multiple_Complex
TC1800009056.hg.1	zinc binding alcohol dehydrogenase domain containing 2	ZADH2	2.6	7.87	6.5	0.29	0.97	T	T	0.0002	0.0053	Coding
TC1700010190.hg.1	intraflagellar transport 20	IFT20	2.6	10.73	9.35	0.14	0.32	T	T	0.0142	0.1394	Multiple_Complex
TC1600010795.hg.1	small nucleolar RNA, C/D box 71	SNORD71	2.6	12.63	11.25	0.27	0.98	T	T	0.0112	0.119	Multiple_Complex
TC2000007512.hg.1	PDX1 C-terminal inhibiting factor 1	PCIF1	2.6	11.75	10.38	0.46	0.41	T	T	0.0071	0.087	Multiple_Complex
TC0700013603.hg.1	RAS p21 protein activator 4	RASA4	2.6	6.94	5.57	0.39	0.49	T	T	0.0005	0.0119	Multiple_Complex
TC0300012189.hg.1	karyopherin alpha 1	KPNA1	2.6	12.13	10.75	0.35	0.27	T	T	1.55e-07	1.93e-05	Multiple_Complex
TC0700012780.hg.1	homeodomain interacting protein kinase 2	HIPK2	2.59	13.59	12.22	0.22	0.42	T	T	0.0004	0.0108	Multiple_Complex
TC1100012794.hg.1	Rho GTPase activating protein 32	ARHGAP32	2.59	10.27	8.9	0.36	0.25	T	T	8.68e-05	0.0032	Multiple_Complex
TC0100015585.hg.1	neuroblastoma breakpoint family, member 25, pseudogene	NBPF25P	2.59	7.52	6.14	0.37	0.41	T	T	0.0017	0.0317	Multiple_Complex
TC1800007685.hg.1	zinc finger protein 407	ZNF407	2.59	9	7.62	0.68	0.55	T	T	0.046	0.2862	Multiple_Complex
TC0900011432.hg.1	RNA binding motif protein 18	RBM18	2.59	12.21	10.84	0.68	0.6	T	T	2.76e-05	0.0013	Multiple_Complex
TC0200008655.hg.1	mitogen-activated protein kinase kinase kinase kinase 4	MAP4K4	2.59	13.56	12.19	0.12	0.09	T	T	1.01e-06	8.84e-05	Multiple_Complex
TC1900011061.hg.1	caspase recruitment domain family, member 8	CARD8	2.59	10.57	9.19	0.22	0.41	T	T	2.25e-05	0.0011	Multiple_Complex
TC0700006652.hg.1	zinc finger protein 316	ZNF316	2.59	9.05	7.68	0.29	0.21	T	T	5.32e-06	0.0003	Multiple_Complex
TC1000006995.hg.1	COMMD3-BMI1 readthrough; BMI1 proto-oncogene, polycomb ring finger; COMM domain containing 3	COMMD3-BMI1; BMI1; COMMD3	2.58	6.42	5.05	0.26	0.5	T	T	0.0004	0.0099	Multiple_Complex
TC0800012454.hg.1	zinc fingers and homeoboxes 1	ZHX1	2.58	9.6	8.23	0.4	0.1	T	T	0.0028	0.0455	Multiple_Complex
TC1200010459.hg.1	prickle homolog 1	PRICKLE1	2.58	11.12	9.75	1.02	0.88	T	T	0.0021	0.0367	Multiple_Complex
TC0100007841.hg.1	cell division cycle associated 8	CDCA8	2.58	12.38	11.01	0.58	0.26	T	T	0.0008	0.0174	Multiple_Complex
TC1100007264.hg.1		RP11-350D17.3	2.58	9.15	7.78	0.37	0.2	T	T	2.88e-05	0.0013	Multiple_Complex
TC1300009505.hg.1	ATP binding cassette subfamily C member 4	ABCC4	2.58	10.82	9.45	0.38	0.38	T	T	0.0005	0.0118	Multiple_Complex
TC0200015082.hg.1	FK506 binding protein 7	FKBP7	2.58	10.32	8.95	0.68	0.46	T	T	0.0002	0.007	Multiple_Complex
TC0100018486.hg.1	CDC42 small effector 1	CDC42SE1	2.58	13.52	12.15	0.38	0.14	T	T	4.79e-07	4.85e-05	Multiple_Complex
TC1400010575.hg.1	BCL2-like 2	BCL2L2	2.57	8.01	6.65	0.28	0.04	T	T	0.0001	0.0041	Multiple_Complex
TC0700012734.hg.1	cAMP responsive element binding protein 3-like 2	CREB3L2	2.57	9.9	8.54	0.28	0.61	T	T	0.0004	0.0115	Multiple_Complex
TC0900007083.hg.1	ribosomal protein L36a pseudogene 33	RPL36AP33	2.57	6.92	5.56	0.62	0.66	T	T	0.0438	0.2787	Multiple_Complex
TC0900011169.hg.1		RP11-151F5.2	2.57	7.43	6.07	0.44	0.26	T	T	0.0004	0.0112	Multiple_Complex
TC0800008760.hg.1		RP11-959I15.1	2.57	5.34	3.98	0.21	0.63	T	T	0.0013	0.0257	Multiple_Complex
TC2100006578.hg.1	neurofibromin 1 pseudogene 3	NF1P3	2.57	9.37	8.02	0.52	0.72	T	T	0.0028	0.046	Multiple_Complex
TC1200011385.hg.1	lin-7 homolog A (C. elegans)	LIN7A	2.57	10.18	8.82	0.64	0.26	T	T	0.0389	0.2605	Multiple_Complex
TC1500010093.hg.1	electron-transfer-flavoprotein, alpha polypeptide	ETFA	2.56	12.82	11.46	0.52	0.16	T	T	0.0009	0.0204	Multiple_Complex
TC0700010687.hg.1	kelch repeat and BTB (POZ) domain containing 2	KBTBD2	2.56	11.18	9.82	0.33	0.91	T	T	0.0006	0.0139	Multiple_Complex
TC1100012452.hg.1	Down syndrome cell adhesion molecule like 1	DSCAML1	2.56	5.83	4.48	0.18	0.2	T	F	2.43e-07	2.81e-05	Coding
TC1500009904.hg.1	transducin-like enhancer of split 3	TLE3	2.56	11.81	10.46	0.51	0.3	T	T	0.001	0.0208	Multiple_Complex
TC0200012082.hg.1	intraflagellar transport 172	IFT172	2.56	9.58	8.23	0.14	0.85	T	T	0.0008	0.0173	Multiple_Complex
TC1000007552.hg.1	Jeck2013 ANNOTATED, INTERNAL, ncRNA, OVEXON best transcript TCONS_l2_00003977	TCONS_l2_00003977	2.56	16.11	14.76	0.53	0.34	T	T	7.46e-07	7e-05	Multiple_Complex
TC1600008991.hg.1	lipase maturation factor 1	LMF1	2.56	9.13	7.77	0.42	0.11	T	T	6.36e-05	0.0025	Multiple_Complex
TC0600007610.hg.1	mutS homolog 5; MSH5-SAPCD1 readthrough (NMD candidate); suppressor APC domain containing 1	MSH5; MSH5-SAPCD1; SAPCD1	2.56	9.81	8.46	0.64	0.31	T	T	0.0002	0.0058	Multiple_Complex
TC0600012361.hg.1		RP11-477E3.2	2.55	5.77	4.42	0.81	0.45	T	F	0.0037	0.0551	Multiple_Complex
TC0600009144.hg.1	KIAA1919	KIAA1919	2.55	9.19	7.84	0.09	0.76	T	T	0.0002	0.0065	Multiple_Complex
TC0400012940.hg.1	SEC31 homolog A, COPII coat complex component	SEC31A	2.55	15.65	14.3	0.16	0.41	T	T	8.96e-06	0.0005	Multiple_Complex
TC1600007485.hg.1	fibrosin	FBRS	2.55	6.05	4.7	0.25	0.24	T	T	0.0005	0.0119	Multiple_Complex
TC1100008038.hg.1	sorting nexin 32	SNX32	2.55	7.36	6.01	0.35	0.36	T	T	0.0004	0.0109	Multiple_Complex
TC0600007788.hg.1	signal peptide, CUB domain, EGF-like 3	SCUBE3	2.55	6.57	5.22	0.65	0.55	T	T	0.0007	0.0162	Multiple_Complex
TC0900011396.hg.1	RAB14, member RAS oncogene family	RAB14	2.55	13.39	12.04	0.23	0.31	T	T	2.57e-06	0.0002	Coding
TC1000010256.hg.1	enhancer of polycomb homolog 1 (Drosophila)	EPC1	2.55	11	9.65	0.85	0.08	T	T	0.0019	0.034	Multiple_Complex
TC0700009122.hg.1	kelch domain containing 10	KLHDC10	2.55	8.12	6.77	0.23	0.41	T	T	2.77e-05	0.0013	Multiple_Complex
TC0400010132.hg.1	transmembrane anterior posterior transformation 1	TAPT1	2.55	11.7	10.35	0.59	0.09	T	T	6.16e-05	0.0025	Multiple_Complex
TC0600010627.hg.1		RP1-140K8.2	2.55	9.08	7.73	0.09	0.11	T	T	2.27e-05	0.0011	Multiple_Complex
TC0100011262.hg.1	proline/arginine-rich end leucine-rich repeat protein	PRELP	2.55	6.26	4.91	0.43	0.43	T	T	0.0039	0.0582	Coding
TC1500009348.hg.1	fibrillin 1	FBN1	2.55	7.4	6.05	0.67	0.66	T	T	0.0399	0.2644	Multiple_Complex
TC0600007701.hg.1	PHD finger protein 1	PHF1	2.55	10.79	9.45	0.78	0.4	T	T	0.0167	0.155	Multiple_Complex
TC0900006921.hg.1	solute carrier family 25 (mitochondrial carrier; adenine nucleotide translocator), member 6 pseudogene 2 [Source:HGNC Symbol;Acc:HGNC:43850]	SLC25A6P2	2.55	12.95	11.6	0.28	0.37	T	T	0.0003	0.008	Multiple_Complex
TC1000008388.hg.1	Fas cell surface death receptor	FAS	2.54	8.85	7.51	0.38	0.31	T	T	0.0004	0.0108	Multiple_Complex
TC1000012581.hg.1	ARHGAP19-SLIT1 readthrough (NMD candidate)	ARHGAP19-SLIT1	2.54	13.88	12.54	0.39	0.31	T	T	0.0008	0.0187	Multiple_Complex
TC0100018323.hg.1	immediate early response 5	IER5	2.54	8.09	6.74	0.97	0.48	T	T	0.0041	0.0595	Coding
TC0100012395.hg.1	ribosomal protein L23a pseudogene 24 [Source:HGNC Symbol;Acc:HGNC:36176]	RPL23AP24	2.54	10.56	9.21	0.08	0.53	T	T	3.24e-05	0.0015	Multiple_Complex
TC0900011626.hg.1	CDKN1A interacting zinc finger protein 1	CIZ1	2.54	14.07	12.73	0.5	0.2	T	T	0.0031	0.0493	Multiple_Complex
TC0800007704.hg.1	ribosomal protein L37 pseudogene 6 [Source:HGNC Symbol;Acc:HGNC:31080]	RPL37P6	2.54	15.84	14.5	0.14	0.08	T	T	3.18e-06	0.0002	Multiple_Complex
TC0X00009205.hg.1	SH3-domain kinase binding protein 1	SH3KBP1	2.54	11.02	9.68	0.27	0.19	T	T	0.0013	0.0258	Multiple_Complex
TC1900007513.hg.1	ribosomal protein L36a pseudogene 51	RPL36AP51	2.54	9.07	7.73	0.26	0.29	T	T	2.94e-05	0.0014	Multiple_Complex
TC0200007181.hg.1	Yip1 domain family member 4	YIPF4	2.54	11.72	10.38	0.11	0.71	T	T	0.0001	0.0038	Multiple_Complex
TC1200007535.hg.1	calcium channel, voltage-dependent, beta 3 subunit	CACNB3	2.54	9.89	8.55	0.25	0.53	T	T	5.08e-05	0.0021	Multiple_Complex
TC0X00011325.hg.1	malignant T-cell amplified sequence 1	MCTS1	2.54	11.65	10.31	0.22	0.43	T	T	5.25e-05	0.0022	Multiple_Complex
TC0800007894.hg.1		GS1-44D20.1	2.54	13.84	12.5	0.1	0.17	T	T	1.45e-05	0.0008	Multiple_Complex
TC1500010848.hg.1	WAS protein homolog associated with actin, golgi membranes and microtubules pseudogene 1	WHAMMP1	2.53	8.97	7.63	0.34	0.39	T	T	4.52e-05	0.0019	Multiple_Complex
TC0600013361.hg.1	Cbp/p300-interacting transactivator, with Glu/Asp rich carboxy-terminal domain, 2	CITED2	2.53	13.77	12.43	1.44	0.13	T	T	0.0049	0.0674	Coding
TC1000009505.hg.1	ribosomal protein L23a pseudogene 60	RPL23AP60	2.53	10.3	8.96	0.31	0.51	T	T	0.0004	0.0096	Multiple_Complex
TC0100013873.hg.1	human immunodeficiency virus type I enhancer binding protein 3	HIVEP3	2.53	5.23	3.89	0.41	0.66	T	T	0.0012	0.0239	Multiple_Complex
TC1500010275.hg.1	golgin A2 pseudogene 7	GOLGA2P7	2.53	12.47	11.13	0.22	0.34	T	T	7.9e-05	0.003	Multiple_Complex
TC1900011666.hg.1	zinc finger protein 627	ZNF627	2.53	10.98	9.64	0.36	0.32	T	T	2.34e-05	0.0011	Multiple_Complex
TC0200013912.hg.1	cytoskeleton associated protein 2-like	CKAP2L	2.53	12.13	10.79	0.72	1.11	T	T	0.0245	0.1978	Multiple_Complex
TC0300011124.hg.1	cytokine inducible SH2-containing protein	CISH	2.53	6.85	5.51	0.31	0.31	T	T	0.0009	0.0189	Multiple_Complex
TC0100012089.hg.1	G protein-coupled receptor 137B	GPR137B	2.53	10.7	9.36	0.18	0.47	T	T	3.2e-06	0.0002	Multiple_Complex
TC0100017179.hg.1	suppression of tumorigenicity 13 (colon carcinoma) (Hsp70 interacting protein) pseudogene 19 [Source:HGNC Symbol;Acc:HGNC:38862]	ST13P19	2.53	6.3	4.97	0.33	0.21	T	T	0.0002	0.0072	Multiple_Complex
TC1200011936.hg.1	ataxin 2	ATXN2	2.53	14.26	12.92	0.47	0.55	T	T	0.0032	0.0504	Multiple_Complex
TC1700008144.hg.1	Sp2 transcription factor	SP2	2.52	9.81	8.47	0.65	0.32	T	T	0.0036	0.0544	Multiple_Complex
TC1600006964.hg.1		RP11-14K2.1	2.52	9.54	8.2	0.4	0.1	T	T	0.0104	0.1137	Multiple_Complex
TC0400008650.hg.1	RNA binding motif protein 48 pseudogene 1 [Source:HGNC Symbol;Acc:HGNC:44054]	RBM48P1	2.52	5.87	4.54	0.4	0.54	T	T	0.0059	0.0768	Multiple_Complex
TC0300009104.hg.1	ribosomal protein L21 pseudogene 71 [Source:HGNC Symbol;Acc:HGNC:36049]	RPL21P71	2.52	9.6	8.26	0.2	0.23	T	T	1.24e-05	0.0007	Multiple_Complex
TC1700010762.hg.1	vesicle amine transport 1	VAT1	2.52	15.41	14.08	0.34	0.3	T	T	0.0103	0.1129	Multiple_Complex
TC1200012864.hg.1	coiled-coil domain containing 92	CCDC92	2.52	7.82	6.49	0.62	0.12	T	T	0.0289	0.2183	Multiple_Complex
TC0300010955.hg.1	ALS2 C-terminal like	ALS2CL	2.52	5.64	4.31	0.8	0.09	T	T	9.42e-05	0.0034	Multiple_Complex
TC0600011379.hg.1	mediator of DNA-damage checkpoint 1	MDC1	2.52	10.26	8.93	0.58	0.15	T	T	0.0001	0.004	Multiple_Complex
TC2200006703.hg.1	hypermethylated in cancer 2	HIC2	2.51	6.6	5.27	0.27	0.52	T	T	0.0008	0.0172	Multiple_Complex
TC0300008271.hg.1	bobby sox homolog (Drosophila)	BBX	2.51	12.42	11.09	0.58	0.56	T	T	0.0256	0.2028	Multiple_Complex
TC1500010237.hg.1	ribosomal protein L9	RPL9	2.51	15.64	14.31	0.08	0.25	T	T	0.0003	0.0078	Multiple_Complex
TC1600006733.hg.1	GLIS family zinc finger 2	GLIS2	2.51	8.9	7.57	0.3	0.33	T	T	2.47e-05	0.0012	Multiple_Complex
TC1200008843.hg.1	family with sequence similarity 216, member A	FAM216A	2.51	9.91	8.58	0.45	0.51	T	T	0.0024	0.0412	Multiple_Complex
TC0900010637.hg.1	growth arrest-specific 1	GAS1	2.51	4.72	3.39	0.59	0.3	T	F	0.0002	0.0056	Coding
TC1300009984.hg.1	SLIT and NTRK-like family, member 5	SLITRK5	2.51	7.76	6.43	0.23	0.13	T	T	0.0004	0.0104	Coding
TC0300010066.hg.1	forty-two-three domain containing 1	FYTTD1	2.51	11.82	10.49	0.44	0.44	T	T	0.0029	0.0465	Multiple_Complex
TC0600010697.hg.1		RP1-182O16.1	2.51	8.87	7.54	0.19	0.45	T	T	0.0032	0.0504	Multiple_Complex
TC0600009264.hg.1		RP11-632C17__A.1	2.5	11.55	10.22	0.03	0.15	T	T	0.0006	0.0148	Multiple_Complex
TC2200007909.hg.1	microtubule associated monooxygenase, calponin and LIM domain containing 3	MICAL3	2.5	8.46	7.13	0.91	0.13	T	T	0.0021	0.0374	Multiple_Complex
TC0400012326.hg.1		RP11-366M4.1	2.5	10.38	9.06	0.34	0.23	T	T	0.0023	0.04	Multiple_Complex
TC2100007467.hg.1	disco-interacting protein 2 homolog A	DIP2A	2.5	9.56	8.23	0.14	0.22	T	T	3.9e-05	0.0017	Multiple_Complex
TC0400008213.hg.1	RAP1, GTP-GDP dissociation stimulator 1	RAP1GDS1	2.5	8.73	7.41	0.36	0.46	T	T	0.0004	0.0105	Multiple_Complex
TC0X00007558.hg.1	neuroligin 3	NLGN3	2.5	11.1	9.78	1.59	0.65	T	T	0.0112	0.1189	Multiple_Complex
TC1800008948.hg.1	ribosomal protein L31 pseudogene 9	RPL31P9	2.5	5.21	3.89	0.32	0.3	T	F	0.0008	0.0187	Multiple_Complex
TC0100010067.hg.1		AL590431.1	2.5	10.6	9.28	0.28	0.43	T	T	0.0143	0.1399	Multiple_Complex
TC0700012995.hg.1	zinc finger protein 777	ZNF777	2.5	8.35	7.03	0.34	0.13	T	T	1.96e-05	0.001	Coding
TC0500013319.hg.1	glucuronidase, beta pseudogene 9	GUSBP9	2.5	13.53	12.21	0.37	0.38	T	T	0.0008	0.0185	Multiple_Complex
TC0200012522.hg.1	F-box protein 11	FBXO11	2.49	12.29	10.97	0.47	0.2	T	T	1.21e-05	0.0007	Multiple_Complex
TC0200016646.hg.1	mediator of cell motility 1	MEMO1	2.49	12.21	10.89	0.13	0.28	T	T	0.0002	0.0065	Multiple_Complex
TC0100014910.hg.1	transforming growth factor beta receptor III	TGFBR3	2.49	8.08	6.76	0.17	0.57	T	T	0.0038	0.0571	Multiple_Complex
TC1600008615.hg.1		RP11-481E4.1	2.49	6.13	4.81	0.27	0.25	T	T	0.0004	0.0097	Multiple_Complex
TC0100013193.hg.1	heterochromatin protein 1, binding protein 3	HP1BP3	2.49	12.83	11.51	0.19	0.49	T	T	1.84e-05	0.0009	Multiple_Complex
TC0700012917.hg.1	thiamin pyrophosphokinase 1	TPK1	2.49	7.82	6.5	0.5	1.15	T	T	0.0045	0.0638	Multiple_Complex
TC1900008433.hg.1	glioma tumor suppressor candidate region gene 2; small nucleolar RNA, C/D box 23	GLTSCR2; SNORD23	2.49	9.64	8.33	0.29	0.5	T	T	0.003	0.0481	Multiple_Complex
TC1900008824.hg.1	myeloid-associated differentiation marker	MYADM	2.49	14.57	13.26	0.88	0.56	T	T	0.013	0.1316	Multiple_Complex
TC0300010720.hg.1	EPM2A (laforin) interacting protein 1	EPM2AIP1	2.49	8.13	6.82	0.39	0.88	T	T	0.0236	0.1933	Multiple_Complex
TC1100008985.hg.1	ATM serine/threonine kinase	ATM	2.49	13.09	11.77	0.7	0.61	T	T	0.0191	0.1693	Multiple_Complex
TC0300013635.hg.1	ArfGAP with coiled-coil, ankyrin repeat and PH domains 2	ACAP2	2.49	11.09	9.78	0.35	0.36	T	T	0.0013	0.0255	Multiple_Complex
TC1300006891.hg.1	Uncharacterized protein [Source:UniProtKB/TrEMBL;Acc:A0A096LNP8]	AL138706.2	2.48	4.64	3.32	0.97	0.22	F	F	0.0495	0.2983	Coding
TC1600007819.hg.1	naked cuticle homolog 1 (Drosophila)	NKD1	2.48	7.23	5.92	1.21	0.18	T	T	0.0238	0.1942	Multiple_Complex
TC0300008989.hg.1	solute carrier family 25 (pyrimidine nucleotide carrier), member 36	SLC25A36	2.48	12.24	10.93	0.39	1.53	T	T	0.0226	0.188	Multiple_Complex
TC1600008698.hg.1	Gse1 coiled-coil protein	GSE1	2.48	11.28	9.97	0.32	0.22	T	T	0.0005	0.0122	Multiple_Complex
TC0800007460.hg.1	heparan-alpha-glucosaminide N-acetyltransferase	HGSNAT	2.48	9.83	8.51	0.73	0.48	T	T	0.0149	0.1438	Multiple_Complex
TC0100017375.hg.1	small nucleolar RNA, H/ACA box 36B; microRNA 664a	SNORA36B; MIR664A	2.48	7.01	5.7	0.95	0.67	T	T	0.0008	0.0186	Multiple_Complex
TC2100008543.hg.1	ankyrin repeat domain 20 family, member A11, pseudogene	ANKRD20A11P	2.48	6.14	4.83	0.88	0.33	T	T	0.0044	0.0627	Multiple_Complex
TC0X00009255.hg.1	ribosomal protein L9 pseudogene 7	RPL9P7	2.48	14.88	13.57	0.03	0.21	T	T	0.001	0.0208	Multiple_Complex
TC0700008004.hg.1	GTF2I repeat domain containing 1	GTF2IRD1	2.48	9.81	8.5	0.66	0.64	T	T	0.0153	0.1468	Multiple_Complex
TC1500010877.hg.1	poly(ADP-ribose) polymerase family member 16	PARP16	2.48	8.09	6.78	0.16	0.49	T	T	5.37e-06	0.0003	Multiple_Complex
TC0200008811.hg.1	SH3 domain containing ring finger 3	SH3RF3	2.48	6.38	5.07	0.19	0.13	T	T	0.0084	0.0979	Multiple_Complex
TC0100017241.hg.1	transmembrane protein 206	TMEM206	2.48	10.95	9.64	0.25	0.6	T	T	7.21e-05	0.0028	Multiple_Complex
TC2100008163.hg.1	poly(rC) binding protein 2 pseudogene 1	PCBP2P1	2.48	6.11	4.8	0.24	0.27	T	T	5.99e-05	0.0024	Multiple_Complex
TC2200009262.hg.1	eukaryotic translation initiation factor 3, subunit L	EIF3L	2.48	17.27	15.96	0.3	0.25	T	T	8.11e-07	7.49e-05	Multiple_Complex
TC0100011485.hg.1	REST corepressor 3	RCOR3	2.48	8.35	7.05	0.32	0.58	T	T	0.0043	0.062	Multiple_Complex
TC0200011915.hg.1		AC012065.5	2.48	10.03	8.72	0.5	0.43	T	T	0.0002	0.0061	Multiple_Complex
TC1700007585.hg.1	schlafen family member 5	SLFN5	2.48	9.21	7.9	0.31	0.26	T	T	0.0043	0.062	Multiple_Complex
TC1300008497.hg.1	ubiquitin-like 3	UBL3	2.48	12.92	11.61	0.57	0.54	T	T	0.0328	0.2357	Multiple_Complex
TC0200016750.hg.1	nuclear factor, erythroid 2-like 2	NFE2L2	2.47	11.78	10.47	1.24	0.26	T	T	0.0048	0.0669	Multiple_Complex
TC0100008540.hg.1	late endosomal/lysosomal adaptor, MAPK and MTOR activator 5 pseudogene 1 [Source:HGNC Symbol;Acc:HGNC:31854]	LAMTOR5P1	2.47	7.66	6.35	0.55	0.26	T	T	3.17e-05	0.0014	Multiple_Complex
TC1300009674.hg.1	KDEL (Lys-Asp-Glu-Leu) containing 1	KDELC1	2.47	11.71	10.41	0.46	0.57	T	T	0.0154	0.1474	Multiple_Complex
TC1900010309.hg.1	ribosomal protein L9 pseudogene 32	RPL9P32	2.47	10.3	8.99	0.23	0.5	T	T	0.0035	0.0537	Multiple_Complex
TC1100012811.hg.1	nuclear factor related to kappaB binding protein	NFRKB	2.47	10.01	8.71	0.27	0.61	T	T	0.0006	0.0146	Multiple_Complex
TC1900007061.hg.1	zinc finger protein 844	ZNF844	2.47	10.44	9.13	0.74	0.55	T	T	0.0054	0.0717	Coding
TC2000006571.hg.1	spermine oxidase	SMOX	2.47	7.58	6.28	0.48	0.34	T	T	0.0037	0.0558	Multiple_Complex
TC0400010491.hg.1		RP11-333E13.2	2.47	9.1	7.8	0.09	0.38	T	T	3e-06	0.0002	Multiple_Complex
TC0600012061.hg.1	intestinal cell (MAK-like) kinase	ICK	2.47	12.04	10.74	0.18	0.4	T	T	0.0014	0.0266	Multiple_Complex
TC0600009059.hg.1	forkhead box O3	FOXO3	2.47	10.4	9.1	0.26	0.41	T	T	9.53e-05	0.0034	Multiple_Complex
TC0X00008084.hg.1	collagen, type IV, alpha 5	COL4A5	2.46	8.26	6.96	0.09	0.49	T	T	0.0191	0.1689	Multiple_Complex
TC1200009931.hg.1	taste receptor, type 2, member 46	TAS2R46	2.46	6.32	5.02	0.57	0.24	T	F	0.0023	0.0391	Coding
TC0900011526.hg.1		RP11-65N13.6	2.46	14.65	13.35	0.34	0.78	T	T	0.0363	0.2502	Multiple_Complex
TC0600008447.hg.1	adhesion G protein-coupled receptor B3	ADGRB3	2.46	6.94	5.64	0.49	0.23	T	T	0.0091	0.1032	Multiple_Complex
TC0600006864.hg.1	RIO kinase 1	RIOK1	2.46	13.01	11.71	0.87	0.3	T	T	0.0016	0.0306	Multiple_Complex
TC1400009123.hg.1	SOS Ras/Rho guanine nucleotide exchange factor 2	SOS2	2.46	8.04	6.74	0.39	0.71	T	T	0.0001	0.0047	Multiple_Complex
TC0100015079.hg.1	exostosin-like glycosyltransferase 2	EXTL2	2.46	12.36	11.06	0.57	0.59	T	T	0.0002	0.0063	Multiple_Complex
TC0200007533.hg.1	forkhead box N2	FOXN2	2.46	12.16	10.86	0.72	0.6	T	T	0.0207	0.1782	Multiple_Complex
TC0100017028.hg.1	protein phosphatase 1, regulatory subunit 15B	PPP1R15B	2.46	13.28	11.98	0.34	0.48	T	T	0.0019	0.0345	Coding
TC0800006984.hg.1		RP11-382J24.2	2.46	6.21	4.92	0.43	0.51	T	T	0.0129	0.1309	Multiple_Complex
TC0600008346.hg.1	KIAA1586	KIAA1586	2.46	13.44	12.14	0.5	0.76	T	T	0.0444	0.2806	Multiple_Complex
TC1300009570.hg.1	serine/threonine kinase 24	STK24	2.46	12.26	10.97	0.4	0.33	T	T	7.34e-07	6.91e-05	Multiple_Complex
TC0100010459.hg.1		RP11-466F5.3	2.46	7.06	5.77	0.2	0.22	T	T	0.0005	0.012	Multiple_Complex
TC0300012527.hg.1	male-specific lethal 2 homolog (Drosophila)	MSL2	2.46	13.44	12.14	0.13	0.1	T	T	0.0001	0.0038	Coding
TC0100015082.hg.1	diphthamide biosynthesis 5	DPH5	2.46	11.87	10.57	0.35	0.3	T	T	0.0031	0.0495	Multiple_Complex
TC0100007778.hg.1	transcription factor AP-2 epsilon (activating enhancer binding protein 2 epsilon)	TFAP2E	2.45	5.31	4.01	0.43	0.03	T	F	5.42e-06	0.0003	Coding
TC0300007273.hg.1	parathyroid hormone 1 receptor	PTH1R	2.45	5.13	3.84	0.37	0.2	T	F	0.0003	0.0093	Multiple_Complex
TC1800008338.hg.1	potassium channel tetramerization domain containing 1	KCTD1	2.45	9.52	8.23	0.44	0.11	T	T	1.22e-05	0.0007	Multiple_Complex
TC1700011657.hg.1	CDC42 effector protein (Rho GTPase binding) 4	CDC42EP4	2.45	4.98	3.69	0.32	0.19	T	T	0.0002	0.0072	Multiple_Complex
TC0600009368.hg.1	histidine triad nucleotide binding protein 3	HINT3	2.45	10.71	9.42	0.34	0.73	T	T	0.0094	0.1057	Multiple_Complex
TC1600007482.hg.1		RP11-146F11.2	2.45	7.8	6.5	0.28	0.29	T	T	1.45e-06	0.0001	Multiple_Complex
TC0400012452.hg.1	F-box protein 8	FBXO8	2.45	10.13	8.83	0.13	0.9	T	T	0.0004	0.0104	Coding
TC0100012435.hg.1		RP11-54O7.10	2.45	10.48	9.19	0.07	0.35	T	T	0.0076	0.0913	Multiple_Complex
TC0500013299.hg.1	TEC	RP11-1250I15.1	2.45	14.24	12.95	0.21	0.24	T	T	3.55e-05	0.0016	Multiple_Complex
TC1600008141.hg.1	core-binding factor, beta subunit	CBFB	2.45	13.85	12.56	0.19	0.44	T	T	5.07e-05	0.0021	Multiple_Complex
TC1100009615.hg.1	VPS26 retromer complex component B	VPS26B	2.45	12.5	11.21	0.27	0.11	T	T	0.0005	0.0134	Multiple_Complex
TC0200010624.hg.1	phosphoinositide kinase, FYVE finger containing	PIKFYVE	2.45	12.52	11.23	0.74	0.55	T	T	0.0133	0.1334	Multiple_Complex
TC0500007303.hg.1	nicotinamide nucleotide transhydrogenase	NNT	2.44	11.02	9.73	0.33	0.15	T	T	0.0019	0.0339	Multiple_Complex
TC1900007957.hg.1	zinc finger protein 568	ZNF568	2.44	9.86	8.57	0.71	0.99	T	T	0.0194	0.1709	Multiple_Complex
TC0600011857.hg.1	cullin 7	CUL7	2.44	9.71	8.42	0.46	0.24	T	T	0.0028	0.0459	Multiple_Complex
TC0100011901.hg.1	RAB4A, member RAS oncogene family; S-phase response (cyclin related)	RAB4A; SPHAR	2.44	13.07	11.78	0.17	0.38	T	T	1.51e-05	0.0008	Multiple_Complex
TC1500008448.hg.1		RP11-522B15.1	2.44	7.33	6.04	0.27	0.33	T	T	0.0049	0.0678	Multiple_Complex
TC1400006663.hg.1	LDL receptor related protein 10	LRP10	2.44	9.16	7.87	0.51	0.47	T	T	0.0036	0.0546	Multiple_Complex
TC0200011992.hg.1	DnaJ (Hsp40) homolog, subfamily C, member 27	DNAJC27	2.44	9.5	8.21	0.07	0.33	T	T	0.0002	0.007	Multiple_Complex
TC1600008932.hg.1	LUC7-like	LUC7L	2.44	12.02	10.73	0.22	0.33	T	T	0.0015	0.0281	Multiple_Complex
TC0100011482.hg.1		RP11-543B16.1	2.44	9.43	8.14	0.3	0.24	T	T	0.0013	0.0259	Multiple_Complex
TC0X00008201.hg.1		AC005000.1	2.44	13.38	12.1	0.23	0.42	T	T	0.0017	0.032	Multiple_Complex
TC1600008888.hg.1	ribosomal protein L13; small nucleolar RNA, C/D box 68	RPL13; SNORD68	2.44	15.55	14.27	0.24	0.47	T	T	0.0005	0.0129	Multiple_Complex
TC1500010778.hg.1	interleukin 16	IL16	2.43	4.43	3.15	0.77	0.36	T	F	0.0012	0.0244	Multiple_Complex
TC1100011980.hg.1	TATA box binding protein associated factor 1D; small nucleolar RNA, H/ACA box 8; small nucleolar RNA, H/ACA box 18; small nucleolar RNA, H/ACA box 40; small nucleolar RNA, H/ACA box 1; small nucleolar RNA, H/ACA box 25; small nucleolar RNA, H/ACA box 32; small nucleolar RNA, C/D box 5; microRNA 1304	TAF1D; SNORA8; SNORA18; SNORA40; SNORA1; SNORA25; SNORA32; SNORD5; MIR1304	2.43	15.19	13.91	0.55	0.42	T	T	0.0039	0.058	Multiple_Complex
TC1000008881.hg.1	MAX interactor 1, dimerization protein	MXI1	2.43	11.55	10.27	0.33	0.62	T	T	0.0129	0.1308	Multiple_Complex
TC0200016667.hg.1	GPR75-ASB3 readthrough	GPR75-ASB3	2.43	13.16	11.88	0.47	0.89	T	T	0.0045	0.0635	Multiple_Complex
TC0300010770.hg.1	cysteine-serine-rich nuclear protein 1	CSRNP1	2.43	6.01	4.73	1.29	0.21	T	T	0.0005	0.0131	Multiple_Complex
TC0700007061.hg.1	WAS/WASL interacting protein family, member 3	WIPF3	2.43	10.24	8.96	0.51	0.38	T	T	0.0058	0.076	Multiple_Complex
TC0200016494.hg.1	cyclin and CBS domain divalent metal cation transport mediator 4	CNNM4	2.43	10.28	9	1	0.31	T	T	0.0017	0.0315	Multiple_Complex
TC0100010246.hg.1		AL359753.1	2.42	10.62	9.34	0.35	0.25	T	T	0.0038	0.0565	Multiple_Complex
TC0600007887.hg.1	zinc finger, AN1-type domain 3	ZFAND3	2.42	13.65	12.37	0.36	0.32	T	T	5.37e-05	0.0022	Multiple_Complex
TC0300008979.hg.1	calsyntenin 2	CLSTN2	2.42	6.06	4.78	0.71	0.16	T	T	0.0278	0.213	Multiple_Complex
TC1700010604.hg.1	nuclear receptor subfamily 1, group D, member 1	NR1D1	2.42	8.47	7.19	0.44	0.46	T	T	0.0332	0.2375	Multiple_Complex
TC1700009604.hg.1		RP11-530N7.2	2.42	4.59	3.31	1.15	0.14	T	F	9.78e-05	0.0035	Multiple_Complex
TC0100012381.hg.1	ribosomal protein L23a pseudogene 25 [Source:HGNC Symbol;Acc:HGNC:35672]	RPL23AP25	2.42	12.01	10.74	0.21	0.43	T	T	0.0004	0.0101	Multiple_Complex
TC0600009801.hg.1	ribosomal protein S18 pseudogene 9	RPS18P9	2.42	9.07	7.8	0.24	0.56	T	T	0.0103	0.1129	Multiple_Complex
TC0200009091.hg.1	v-ral simian leukemia viral oncogene homolog B	RALB	2.42	10.77	9.49	0.31	0.84	T	T	0.0006	0.014	Multiple_Complex
TC1400008355.hg.1	REST corepressor 1	RCOR1	2.42	11.11	9.83	0.2	0.48	T	T	0.0073	0.0886	Multiple_Complex
TC1300009348.hg.1	sprouty RTK signaling antagonist 2	SPRY2	2.42	11.43	10.16	0.65	0.44	T	T	0.0048	0.0669	Coding
TC0800010090.hg.1		RP1-273G13.1	2.41	7.36	6.09	0.17	0.38	T	T	0.0004	0.0099	Multiple_Complex
TC0900010022.hg.1		RP11-405L18.4	2.41	6.35	5.08	0.24	0.23	T	T	0.0004	0.0096	Multiple_Complex
TC1700010230.hg.1	TGFB1-induced anti-apoptotic factor 1; myosin XVIIIA	TIAF1; MYO18A	2.41	9.37	8.1	0.18	0.08	T	T	0.0002	0.0072	Multiple_Complex
TC0800009113.hg.1	protein tyrosine phosphatase type IVA, member 3	PTP4A3	2.41	12.39	11.12	0.19	0.45	T	T	4.93e-05	0.0021	Multiple_Complex
TC0300006942.hg.1	STT3B, subunit of the oligosaccharyltransferase complex (catalytic)	STT3B	2.41	17.42	16.15	0.34	0.39	T	T	0.0004	0.0099	Multiple_Complex
TC0700012663.hg.1	Homo sapiens microRNA 3654 (MIR3654), microRNA.	MIR3654	2.41	16.89	15.63	0.07	0.36	T	T	9.7e-06	0.0006	Multiple_Complex
TC1900009692.hg.1	zinc finger protein 823	ZNF823	2.41	9.81	8.54	0.58	0.38	T	T	9.48e-05	0.0034	Multiple_Complex
TC0800011249.hg.1	ring finger protein 19A, RBR E3 ubiquitin protein ligase	RNF19A	2.41	7.74	6.47	0.5	0.39	T	T	0.0008	0.0179	Multiple_Complex
TC1700007557.hg.1	chemokine (C-C motif) ligand 2	CCL2	2.41	7.81	6.54	0.98	0.58	T	T	0.0023	0.04	Multiple_Complex
TC0700007433.hg.1	RNA, U6 small nuclear 326, pseudogene [Source:HGNC Symbol;Acc:HGNC:47289]	RNU6-326P	2.41	8.13	6.86	0.31	0.5	T	T	0.0033	0.0518	Multiple_Complex
TC1600010258.hg.1	ribosomal protein L10 pseudogene 14	RPL10P14	2.41	9.29	8.02	0.37	0.47	T	T	0.0189	0.1681	Multiple_Complex
TC0900011072.hg.1	ATP binding cassette subfamily A member 1	ABCA1	2.41	8.54	7.28	0.78	0.32	T	T	0.0381	0.258	Multiple_Complex
TC1700007779.hg.1	male-specific lethal 1 homolog (Drosophila)	MSL1	2.41	11.49	10.23	0.14	0.53	T	T	5.23e-05	0.0022	Multiple_Complex
TC0200010647.hg.1		AC006994.1	2.41	6.76	5.49	0.42	0.22	T	T	0.0021	0.0368	Multiple_Complex
TC0500013241.hg.1	protocadherin beta 5	PCDHB5	2.41	10.79	9.52	0.37	0.59	T	T	0.0002	0.007	Coding
TC1400010634.hg.1	CLOCK-interacting pacemaker	CIPC	2.4	10.32	9.05	0.41	0.39	T	T	0.0007	0.0154	Multiple_Complex
TC2200009259.hg.1	smoothelin	SMTN	2.4	9.18	7.92	0.51	0.37	T	T	0.007	0.0864	Multiple_Complex
TC2100007315.hg.1	ribosomal protein L31 pseudogene 1	RPL31P1	2.4	6.56	5.3	0.42	0.33	T	T	0.0002	0.0068	Multiple_Complex
TC0600013252.hg.1	microRNA 3662	MIR3662	2.4	5.39	4.12	0.83	0.61	T	F	0.0033	0.0511	Multiple_Complex
TC0200012992.hg.1		AC016700.6	2.4	15.98	14.72	0.17	0.45	T	T	0.0027	0.0449	Multiple_Complex
TC1400007221.hg.1	suppressor of cytokine signaling 4	SOCS4	2.4	10.95	9.69	0.5	0.86	T	T	0.0484	0.2944	Multiple_Complex
TC0800012312.hg.1	serum/glucocorticoid regulated kinase family, member 3	SGK3	2.4	9.04	7.78	1.28	0.2	T	T	0.0009	0.0189	Multiple_Complex
TC0100010134.hg.1	death associated protein 3	DAP3	2.4	13.54	12.28	0.3	0.13	T	T	0.0002	0.0053	Multiple_Complex
TC1200010650.hg.1	Rac GTPase activating protein 1	RACGAP1	2.4	15.32	14.06	0.5	0.8	T	T	0.0006	0.014	Multiple_Complex
TC0300013264.hg.1	guanine nucleotide binding protein (G protein), beta polypeptide 4	GNB4	2.4	13.92	12.66	0.48	0.66	T	T	0.0004	0.0111	Multiple_Complex
TC0800006975.hg.1	bone morphogenetic protein 1	BMP1	2.4	5.58	4.32	0.69	0.43	T	T	0.0028	0.0457	Multiple_Complex
TC0100009902.hg.1	pre-mRNA processing factor 3	PRPF3	2.4	13.92	12.66	0.25	0.4	T	T	0.0016	0.031	Multiple_Complex
TC0600012358.hg.1	pleckstrin homology domain interacting protein	PHIP	2.4	14.69	13.43	0.97	0.61	T	T	0.0454	0.2839	Multiple_Complex
TC0500008777.hg.1	kinesin family member 20A	KIF20A	2.4	14.07	12.81	0.8	0.54	T	T	0.0011	0.0231	Multiple_Complex
TC1100013138.hg.1	ribosomal RNA processing 8, methyltransferase, homolog (yeast)	RRP8	2.4	7.96	6.7	0.29	0.4	T	T	6.68e-05	0.0026	Multiple_Complex
TC1900008180.hg.1	zinc finger protein 526	ZNF526	2.39	10.12	8.86	0.29	0.2	T	T	0.0022	0.0383	Coding
TC1500006511.hg.1	WAS protein homolog associated with actin, golgi membranes and microtubules pseudogene 3	WHAMMP3	2.39	7.69	6.43	0.3	0.52	T	T	0.0012	0.0239	Multiple_Complex
TC1500008317.hg.1	CREB regulated transcription coactivator 3	CRTC3	2.39	9.46	8.2	0.66	0.43	T	T	0.0051	0.0688	Multiple_Complex
TC1500010463.hg.1	protein regulator of cytokinesis 1	PRC1	2.39	14.58	13.32	0.31	0.62	T	T	0.0002	0.005	Multiple_Complex
TC0100014152.hg.1	Fas (TNFRSF6) associated factor 1	FAF1	2.39	14.51	13.25	0.57	0.28	T	T	0.001	0.0212	Multiple_Complex
TC1200007594.hg.1	acid sensing ion channel 1	ASIC1	2.39	6.41	5.15	0.79	0.57	T	T	0.0016	0.0296	Multiple_Complex
TC1000011429.hg.1		RP11-366I13.3	2.39	7.92	6.66	0.42	0.19	T	T	0.0007	0.0168	Multiple_Complex
TC1700010847.hg.1	gap junction protein gamma 1	GJC1	2.39	14.15	12.89	0.03	0.65	T	T	3.07e-05	0.0014	Multiple_Complex
TC1100006644.hg.1	ribonucleotide reductase M1	RRM1	2.39	16.31	15.05	0.44	0.41	T	T	0.0009	0.0201	Multiple_Complex
TC1700009500.hg.1	zinc finger, ZZ-type with EF-hand domain 1	ZZEF1	2.39	7.59	6.33	0.24	0.74	T	T	0.0067	0.0836	Multiple_Complex
TC1400006656.hg.1	oxidase (cytochrome c) assembly 1-like	OXA1L	2.39	15.69	14.43	0.33	0.52	T	T	0.0004	0.0099	Multiple_Complex
TC2200008885.hg.1	polymerase (DNA-directed), delta interacting protein 3	POLDIP3	2.39	12.42	11.17	0.63	0.16	T	T	0.0001	0.0037	Multiple_Complex
TC1000011839.hg.1	glycerol-3-phosphate acyltransferase, mitochondrial	GPAM	2.39	9.59	8.34	0.8	0.49	T	T	0.0225	0.1874	Multiple_Complex
TC1600007753.hg.1	lon peptidase 2, peroxisomal	LONP2	2.39	12.69	11.44	0.02	0.11	T	T	1.61e-06	0.0001	Multiple_Complex
TC1500007213.hg.1		RP11-507J18.1	2.39	5.8	4.54	0.16	0.79	T	T	0.0128	0.13	Multiple_Complex
TC0200011441.hg.1	ribosomal protein L23a pseudogene 88 [Source:HGNC Symbol;Acc:HGNC:51579]	RPL23AP88	2.39	11.06	9.81	0.19	0.53	T	T	0.0013	0.0257	Multiple_Complex
TC2100008490.hg.1	BTB and CNC homology 1, basic leucine zipper transcription factor 1	BACH1	2.38	12.15	10.89	0.81	0.5	T	T	0.0012	0.0241	Multiple_Complex
TC1600010116.hg.1		RP11-598D12.1	2.38	7.55	6.3	0.41	0.33	T	T	6.43e-05	0.0025	Multiple_Complex
TC0X00008222.hg.1		RP11-197B12.1	2.38	7.63	6.38	0.19	0.07	T	T	1.14e-05	0.0006	Multiple_Complex
TC1300007794.hg.1	FERM, ARH/RhoGEF and pleckstrin domain protein 1; microRNA 3170	FARP1; MIR3170	2.38	15.15	13.9	0.15	0.4	T	T	3.76e-05	0.0017	Multiple_Complex
TC1100011103.hg.1	syntaxin 5	STX5	2.38	8.9	7.65	0.72	0.32	T	T	0.0184	0.1653	Multiple_Complex
TC0X00007368.hg.1	trophinin	TRO	2.38	13.95	12.69	0.38	0.26	T	T	0.0001	0.0043	Multiple_Complex
TC0200013812.hg.1	ribosomal protein L10 pseudogene 5 [Source:HGNC Symbol;Acc:HGNC:35724]	RPL10P5	2.38	11.19	9.94	0.37	0.62	T	T	0.0136	0.1352	Multiple_Complex
TC1200009967.hg.1	dual specificity phosphatase 16	DUSP16	2.38	13.12	11.87	0.34	0.29	T	T	0.0078	0.0931	Multiple_Complex
TC1500006680.hg.1	WAS protein homolog associated with actin, golgi membranes and microtubules pseudogene 2	WHAMMP2	2.38	8.13	6.88	0.24	0.72	T	T	0.0014	0.0269	Multiple_Complex
TC0100016383.hg.1		BX284613.1	2.37	12.64	11.39	0.24	0.41	T	T	0.0052	0.0706	Multiple_Complex
TC0X00010804.hg.1	zinc finger protein 280C	ZNF280C	2.37	11.89	10.64	0.76	0.85	T	T	0.0335	0.239	Multiple_Complex
TC1000010699.hg.1	inositol polyphosphate multikinase	IPMK	2.37	11.08	9.83	0.36	0.44	T	T	0.0326	0.235	Multiple_Complex
TC1800009103.hg.1	ribosomal protein L26 pseudogene 35	RPL26P35	2.37	7.28	6.03	0.33	0.2	T	T	4.77e-05	0.002	Multiple_Complex
TC1000012575.hg.1	ATPase family, AAA domain containing 1	ATAD1	2.37	14.62	13.38	0.76	0.46	T	T	0.004	0.0589	Multiple_Complex
TC0400012867.hg.1	family with sequence similarity 92, member A3	FAM92A1P2	2.37	6.15	4.9	0.52	0.47	T	T	0.0006	0.0152	Multiple_Complex
TC0300013451.hg.1		RP11-42D20.1	2.37	11.64	10.39	0.23	0.33	T	T	0.001	0.0208	Multiple_Complex
TC0900011236.hg.1	INTS3 and NABP interacting protein	INIP	2.37	10.39	9.15	0.42	0.12	T	T	3.19e-05	0.0014	Multiple_Complex
TC1900006628.hg.1	nuclear factor I/C (CCAAT-binding transcription factor)	NFIC	2.37	6.42	5.17	0.54	0.25	T	T	0.0019	0.0346	Multiple_Complex
TC0700013419.hg.1	actin related protein 2/3 complex subunit 1A	ARPC1A	2.37	14.5	13.26	0.28	0.4	T	T	5.21e-05	0.0022	Multiple_Complex
[truncated: 561 more rows]

## Sheet: GO TERMS +RA 
GO: Molecular Function [Display Chart] 2067 annotations before applied cutoff / 18661 genes in category
[truncated: 35 more rows]

[truncated: 4 more sheets: +RA UNIQUE VS ES, NMP-NC VS ES > 2FOLD, GO TERMS NMP-NC, NMP-NC UNIQUE VS ES]
