# Supplementary material for: Human axial progenitors generate trunk neural crest cells in vitro
Source: eLife. 2018 Aug 10;7:e35786. doi: 10.7554/eLife.35786 (PMC6101942; doi:10.7554/eLife.35786)
Supplement: Supplementary file 3. [file elife-35786-supp3.xlsx]

## Sheet: Sheet1
ANC, +RA, NMP-NC	ANC, +RA	+RA, NMP-NC	ANC, NMP-NC	ANC	"+RA"	NMP-NC
MEF2C	NFIC	MEIS1	MAX	ZNF280A	NCOA3	MEF2A
MEIS2	DLX3	GATAD2B	NHLH1	FOXS1	KMT2A	MKL2
AEBP1	SATB1	ZNF286B	CREBBP	ZNF641	ALX3	MITF
MSX2	RCOR1	ZNF624	ARNT2	TCF7L2	CITED1	HOMEZ
ZFHX3	MLX	ZNF548	RFX4	TRPS1	PHOX2A	KLF11
MYBL1	TWIST1	GAS7	ERF	CSRNP2	ATF3	GTF2IRD2B
BCL6	BAZ2A	ASCL1	RXRG		BACH1	RFXANK
PRDM1		MYCN	HEY1		ZFP36L2	UHRF1
NFATC3		RCOR2	NR4A1		NFE2L2	TSC22D1
PAX3		ZFP36L1	EBF2		FUBP1	NEUROD1
PAX7		CBFB	HES1		FOXK1	NEUROG1
FOXP4		CBFA2T2	HSF1		PBX1	NFATC4
PROX1		PRKN	CC2D1B		PBX3	NFKB1
ZEB2		KLF6	LMO4		CEBPD	NFYC
RARA		CREM			PHF1	ZNF584
ARID3A		CREB5			PLAG1	ZMYM5
EBF1		ZNF516			GTF2IRD1	CDX2
RFX3		ZBTB20			NR1D1	TCEAL1
EGR1		TSC22D2			ATF2	ZNF250
ELF1		DDIT3			CREBRF	PLAGL1
ELK4		EPM2AIP1			RARG	ONECUT2
LEF1		ZBED4			TSC22D3	ZSCAN5A
ETS1		RARB			REL	PPARD
RXRB		HIVEP3			BCL6B	ATF6B
ARID5B		HEYL			ELF4	DACH1
SNAI2		KLF3			ELK3	PURB
SNAI1		CITED2			NR2F6	HDAC5
SOX5		IRF9			ERG	RB1
SOX9		SCML1			ETS2	RELA
SOX10		SOX6			ETV3	E2F5
SOX11		FOXO3			MECOM	RFX2
SP2		ZFP30			ZNF571	EGR3
ZC3H8		ATF6			ZNF699	STAG1
CAMTA2		SCMH1			RREB1	ZBTB18
GLI3		RCOR3			ZNF568	FOXD2
TBX2		LCOR			FOXC1	FOS
ATF7		RAI1			FOXC2	SIX1
TBX3		ZHX3			FLI1	TCF25
ZEB1		ZHX1			TFEC	SREBF2
TEF		KLF12			ZNF280C	NPAS3
TFAP2A		HOXA2			SPEN	ZNF621
TFAP2B		HOXB2			NFAT5	STAT4
TFAP2C		ZKSCAN1			SP3	IKZF4
NR2F1		ZNF75D			GLIS2	ZNF514
NR2F2		ZNF184			TCF12	ZNF436
THRA		PRDM2			TEAD1	POU5F2
BACH2		ZNF438			TEAD3	HOXA3
HSF2		AFF3			ZFPM2	HOXA4
CREB3L2		MXD1			ATOH8	HOXA5
IFI16		ZNF286A			TLE4	HOXA6
ZBTB16					ZNF561	HOXA7
ZNF148					HIVEP1	HOXB3
MEIS3					ZNF585A	HOXB4
BTG2					HMGB2	HOXB5
ALX1					ALX4	HOXB6
SMAD3					CSRNP1	HOXB7
					FOXN2	HOXB8
					ZNF792	HOXC4
					ZNF746	HOXC5
					TFAP2E	HOXC6
					ZKSCAN8	HOXC8
					ZSCAN9	HOXD3
					ZNF226	HOXD4
					JUN	ZNF846
					JUND	ZNF383
					HMGA2	ID3
					SMAD5	ZFX
						ZIC1
						ZNF2
						ZNF3
						ZNF37A
						ZNF79
						ZNF518B
						INSM1
						ISL1
						ZNF112
						JUNB
						FOXP2
