# Supplementary material for: Human axial progenitors generate trunk neural crest cells in vitro
Source: eLife. 2018 Aug 10;7:e35786. doi: 10.7554/eLife.35786 (PMC6101942; doi:10.7554/eLife.35786)
Supplement: Supplementary file 4. [file elife-35786-supp4.xlsx]

## Sheet: NMP-NC D6 VS NMPs-up
GENE	FOLD DIFFERENCE VS NMPs
TFAP2B	1335.88
HOXB-AS3	1234.76
EDNRA	897.35
MEF2C	661.82
CDH6	250.28
NR2F2	225.7
COL11A2	208.02
HHIP	202.58
NPR3	188.53
HOXB9	162.34
ETS1	138.96
ADAM12	136.5
FLRT3	134.72
SCRG1	101.7
MOXD1	94.21
SNAI2	81.25
NGFR	69.79
LINC01198	64.72
CNTN4	60.04
NR2F1	58.88
ASXL3	56.27
HOXB7	49.36
SOX5	49.35
UNC5C	47.74
SULF1	45.03
SOX10	43.48
GFRA1	42.09
NR2F1-AS1	39.1
RFTN2	35.99
CCDC3	32.51
IGFBP3	29.84
HOXA7	29.8
MGLL	26.81
PAX3	26.64
ERBB3	23
HOXC6; HOXC4; HOXC5	22.49
TRIM9	21.91
GREM1	21.6
PLK2	20.32
RP11-752L20.3	19.34
SOX6; MIR6073	18.99
BCHE	18.96
CCDC80; LINC01279	18.72
NAV3	18.06
NDP	18.02
RHOJ	17.76
BOC	17.3
TBX2	16.82
ENC1	16.72
LPAR6	16.53
RN7SL751P	15.96
IGF2	15.32
GFRA3	15.13
DLC1	14.98
EYA4	14.41
MPZ	14.11
TFAP2A	12.92
KCNK5	12.71
PLP1	12.69
ITGA8	12.39
TSHZ2	12.1
ATRNL1	12.02
MUSTN1	11.9
SERPINB9	11.76
DAAM2	11.72
RND3	11.7
FOXD3-AS1	11.21
NID1	11.08
GSTM3	11.07
INSC	10.65
RHOB	10.64
PLAT	10.59
ZNF804A	10.53
skozy	10.13
HOXB6	9.96
ZBTB16	9.78
OSBPL10	9.76
RNF165	9.72
GNG2	9.61
HOXC9	9.55
PMP22	9.55
GFRA2	9.52
ZSWIM6	9.47
CDR1	9.39
PRKD1	9.24
LSAMP	9.17
TTYH1	9.14
GAS7	9.06
EPS8	8.9
C3orf52	8.79
KCNE1	8.73
FOXD2-AS1	8.72
SPHK1	8.69
LINC00673; LINC00511	8.68
ABCG2	8.62
BCAR3	8.56
AF127936.7; TCONS_l2_00017148; LOC100128341	8.51
OR7E104P	8.37
PTN	8.35
LYPD1	8.32

## Sheet: NMP-NC D6 VS NMPs-down
GENE	FOLD DIFFERENCE VS NMPs
MIR302C	-1269
PLA2G2A	-820.5
VAT1L	-735.76
JAKMIP2-AS1	-513.64
POU5F1	-432.77
HTR1D	-371.35
FST	-356.95
ESRG	-249.42
PODXL	-247.86
snodu	-222.55
ZIC3	-222.22
MIR302B	-182.08
CLDN6	-178.95
HES3	-174.16
CD9	-166.45
DMKN	-144.61
MIR302A	-140.27
RNF43	-138.54
CLU; MIR6843	-125.14
APELA	-120.41
WNT8A	-88.54
WNT5B	-88.06
CDH23	-86.21
GDPD2	-81
MIXL1	-74.36
HOXB1	-67.03
GBX2	-58.58
F2RL1	-48.19
ESRP1	-45.69
DAZL	-43.33
SCGB3A2	-40.11
KLHL4	-39.93
CYP2S1	-39.7
NTRK3	-39.26
NMU	-38.38
RP11-209K10.2	-36.83
NRXN3	-36.61
FABP3	-36.12
FGF17	-35.72
SEL1L3	-34.2
POU5F1P4	-32.91
WBSCR17	-29.79
LSR	-29.1
MAL2	-28.6
PRSS8	-28.55
BCL11A	-28.05
SEMA3E	-27.31
MBNL3	-26.87
BST2	-25.34
ST8SIA3	-24.75
RP11-184E9.4	-24.34
KRT19	-23.37
GRB14	-22.75
EPCAM	-22.61
PCSK1	-22.55
RP6-24A23.7	-21.44
OLFM1	-21.27
SLC38A5	-20.72
TUNAR	-19.88
GLDC	-19.62
HOXA1	-19.41
SLC7A8	-19.29
T	-18.99
NKD1	-18.19
RN7SL585P	-16.95
PRMT8	-16.9
USP44	-16.75
LRAT	-15.86
CABLES1	-15.75
ADAMTS19	-15.52
TCN2	-15.33
PAX2	-15.33
lybey	-15.17
PRKG1	-14.74
ATP8A2	-14.68
ROR2	-14.38
PIPOX	-14.25
MYO5B	-14.25
TSTD1	-14.2
TRPM3	-14.08
FERMT1	-13.88
GYLTL1B	-13.71
IRS4	-13.64
NKX1-2	-13.6
CNTNAP3P2; CNTNAP3	-13.51
FZD10	-13.5
CDH10	-13.45
RP11-267L5.1; kohumu	-13.33
PRICKLE1	-12.81
NMRK2	-12.76
RAB25	-12.72
LINC01356	-12.67
KIF5A	-12.62
SORL1	-12.51
LECT1	-12.15
MANSC1	-12.02
MFAP4	-11.95
RGS6	-11.86
LRRN1	-11.75
KRT18	-11.71

## Sheet: +RA D6 VS D3 ANC-up
GENE	FOLD DIFFERENCE VS D3 ANC
RARB	2201.64
SERPINB9	1652.64
BGN	903.31
TBX3	527.02
ALX1	416.52
TBX2	316.87
NID1	268.4
COL11A2	218.27
HOTAIRM1	184.47
HOXA1	175
PDGFRA	135.76
FNDC5	113.68
SNAI1	107.64
LGI4	106.6
CYP26A1	100.68
STC2	93.65
DOCK10	73.93
TXNIP	70.76
NID2	69.98
DUSP6	67.24
ZBTB16	66.63
IGF2	64.44
NR2F1	58.98
CPED1	53.49
LPAR6	51.61
RBMS3	47.96
LAPTM5	47.55
CTSK	47.09
SCN4B	44.9
SAT1	44.26
INSC	42.45
ITGA9	40.9
ANKH	40.29
RARG	38.22
IL17RD	35.94
CCDC60	34.06
GMFG	33.15
MERTK	32.3
TGFBI	31.75
LPL	31.12
DHRS3; MIR6730	30.4
NOS3	30.37
PRICKLE1	30.09
BDKRB2	28.54
ETS2	28.48
FGD5	28.45
NR2F2	27.59
CD68	27.5
CNTNAP3P2; CNTNAP3	27.1
PLAC8	26.35
RP11-380G5.2; PTEN	26.27
ALX3	25.87
RP1-310O13.13	25.61
BHLHE40	25.4
AFF3	24.16
CTB-55P19.1	24.09
RGS10	23.65
FAM74A4	23.32
WNT5A	23.3
KITLG	23.04
MYLIP; MIR4639	22.77
IRF2BPL	22.66
ADGRA2	22.47
NEAT1; MIR612	22.27
NELL1	21.79
FLI1	21.53
CSF1	20.42
IGFBP4	20.22
FAM74A6	19.98
MYO7A	19.17
SLC16A4	19.12
RP11-477H21.2	18.91
SLC30A4	18.8
RP11-236F9.2	18.59
GABRB2	18.46
ITPR3	18.43
PI15	18.1
S100B	17.92
IGF2; INS-IGF2	17.87
FGD4	17.86
SPRY1	16.87
RFTN2	16.72
MOXD1	16.59
VSTM4	16.18
SOX6; MIR6073	16.14
GBE1	15.97
FAXDC2	15.62
SPRY2	15.45
RBP1	15.36
PHLDA1	15.25
MIR6809; TNS1	15.22
SERPINB1	15.09
SOX4	15.06
PDZRN3	14.86
LOC286297	14.78
CYB5A	14.75
ABCA9	14.51
MIR222HG; RP6-99M1.2	14.34
RP11-61L19.3	14.3
SERPINF1	14.27

## Sheet: +RA D6 VS D3 ANC-down
GENE	FOLD DIFFERENCE VS D3 ANC
JAKMIP2-AS1	-449.29
LMO1	-291.21
LHX5	-240.58
MIR302B	-223.94
MIR302C	-192.41
BMP4	-190.34
LHX5-AS1	-173.13
VSNL1	-168.73
CD9	-157.55
PAX2	-150.54
CAPN6	-120.77
PAX7	-115.43
CLDN6	-112.35
CDH9	-100.11
NMNAT2	-92.8
SLC7A8	-90.09
IGFBP5	-88.28
DMBX1	-84.58
CNTN2	-84.17
C8orf34	-82.53
TENM4	-73.17
MIR302A	-71.59
TEK	-69.11
LIX1	-68.53
PMEL	-63.25
GLDC	-60.68
MYL9	-57.63
VAT1L	-54.12
CLU; MIR6843	-53.57
GREM1	-53.12
PAMR1	-52.73
DMKN	-50.55
PIPOX	-50.1
LSR	-47.93
SEZ6	-47.87
WNT4	-47.41
ESRG	-46.27
ACTC1	-44.58
RP11-384O8.1	-44.55
PCYT1B	-42.95
RAB15	-41.02
TAGLN	-39.21
PDE1B	-37.93
GPX3	-37.5
SLC6A8	-36.95
OTX2	-36.58
ZIC3	-36.1
ASS1	-35.82
SHISA2	-34.65
CHRDL1	-34.58
GABRB3	-33.82
ZIC5	-33.39
UCP2	-32.61
ARL4C	-32.55
SLIT1; ARHGAP19-SLIT1	-32.27
TMEM2	-32.22
C18orf8	-32.13
TTC29	-31.48
INA	-31.02
TRPM3	-30.97
BMP2	-30.2
NRIP3	-29.55
SEMA3A	-29.42
CTSV	-29.38
OLFM1	-29.13
FAM111B	-28.8
LCTL	-28.21
ANK2	-27.32
PCDH11X	-26.3
PODXL	-26.01
CNTNAP2	-25.65
BCL11A	-25.3
BOC	-25.25
EHD2	-24.61
ID2	-23.54
CKMT1A	-23.45
RP11-256I9.2	-22.9
TPBG	-22.65
MAP2	-22.63
TFAP2C	-22.28
CXADR	-22.02
KRT19	-21.92
RP11-457D13.4	-21.2
FOXD3-AS1	-21.05
TSPAN2	-20.88
DDR1; MIR4640	-20.84
C8orf34-AS1	-20.81
VASH2	-19.31
EPHB1	-19.24
PKIA	-19.02
CDH23	-18.99
DAZL	-18.91
NPY	-18.62
PRSS8	-18.46
FJX1	-18.33
LTBP1	-18.23
PVRL1	-18.01
THBS1	-17.97
LMO3	-17.66
CTB-151G24.2	-17.53

## Sheet: ANC D6 vs D3 ANC-up
GENE	FOLD DIFFERENCE VS D3 ANC
SERPINB9	577.04
COL11A2	393.98
ADAM12	266.67
BGN	200.16
NID1	167.66
TXNIP	84.89
NR2F1	81.56
NR2F2	59.86
DOCK10	53.11
GFRA2	26.96
TRIL	25.92
GFRA1	23.11
RGS10	23.02
LINC01198	21.84
ETV5	20.89
DUSP6	20.59
LAPTM5	19.14
NID2	18.83
RFTN2	16.61
FOXD2-AS1	16.59
A2M	16.56
SNORD115-6	16.13
FGD5	16.02
ARRDC4	15.76
KDELR3	15.36
MIR670	14.98
SOX6; MIR6073	14.61
MEF2C	13.59
GMFG	13.21
SP110	12.87
MMP2	12.66
SNAI1	12.65
NPR3	12.45
ERBB3	11.08
ATRNL1	10.96
LPAR6	10.78
SMOC1	10.3
ALX1	10.24
DUSP4	10.17
SNORD115-14	10.14
RXRG	10.06
FAM49A	9.93
GFRA3	9.81
KANK4	9.81
NR4A1	9.8
LRCH1	9.01
BCHE	8.65
ATP1B2	8.59
OSBPL10	8.57
NGFR	8.32
SPATA31C2	8.21
LSAMP	7.92
SPON1	7.92
NR2F1-AS1	7.83
RGS16	7.6
UNC5C	7.58
SOX10	7.52
LPL	7.49
MIR20B	7.48
PADI2	7.44
SPRY2	7.4
EYA1	7.27
ARRB1	7.24
ABCA5	7.2
OR7E104P	7.09
ZBTB16	7.05
COL9A1	6.99
PZP	6.93
RP11-274M17.2	6.87
VLDLR	6.83
MIR19B2	6.78
ELK3	6.69
PLEKHH1	6.63
LETMD1	6.63
MMP17	6.61
EDNRA	6.57
RP11-159D12.2; TCONS_00025146	6.55
GALNT14	6.55
LAMB1	6.28
GSN	6.23
CLIP4	6.22
EDA2R	6.22
KRTAP21-1	6.18
SSFA2	6.14
RHOJ	6.11
ROPN1B	6.08
OVGP1	6.06
CAMK2N1	6.02
TRPV4	6.02
RNF24	6
FAM65A	5.96
CDKN1A	5.93
SNORA11	5.93
CDR1	5.91
SPATA31C1	5.87
CTSB	5.86
MAML2	5.79
MIR18B	5.78
LBH	5.75
SULF1	5.7

## Sheet: ANC D6 vs D3 ANC-down
GENE	FOLD DIFFERENCE VS D3 ANC
LMO1	-290.33
LHX5	-230.1
MIR302C	-180.79
PAX2	-139.92
LHX5-AS1	-124.97
VSNL1	-119.81
MIR302B	-104.67
CDH9	-100.69
C8orf34	-99.52
CAPN6	-88.25
JAKMIP2-AS1	-82.63
BMP2	-73.11
DMBX1	-69.73
MIR302A	-66.74
SHISA2	-63.6
CNTN2	-63.24
LIX1	-60.12
PAX7	-53.4
WNT4	-51.05
CLU; MIR6843	-51.03
EPHA4	-49.82
TRPM3	-48.66
TEK	-47.22
LRRTM1	-45.19
PAMR1	-40.75
CLDN6	-39.73
SEZ6	-39.02
GREM1	-38.94
NMNAT2	-37.26
VAT1L	-37.24
RP11-384O8.1	-35.66
ANXA3	-34.29
PODXL	-33.2
ALPL	-31.97
AC008623.1	-31.44
GLDC	-31.37
TTC29	-29.99
LSR	-29.89
SEMA3A	-29.54
C8orf34-AS1	-29.44
CD9	-29.01
CDH23	-27.45
ZIC5	-27.3
MYL9	-27.18
SLC7A8	-26.69
RGS5	-26.37
DPYSL5	-24.87
ACTC1	-24.8
CHRNB4	-24.71
BMPER	-24.02
EGLN3	-23.46
GABRB3	-23.25
CXADR	-22.72
LGI1	-22.18
SLIT1; ARHGAP19-SLIT1	-21.8
DAAM1	-21.39
ESRG	-21.35
CNTNAP2	-21.17
TENM4	-20.8
ANXA1	-20.78
AKAP12	-20.49
TPBG	-20.08
NRXN3	-19.79
ANOS1	-19.76
RP11-457D13.4	-19.73
KRT19	-19.62
CTSV	-19.56
NRIP3	-19.48
ARL4C	-19.43
GPX3	-19
DAZL	-18.19
ZIC3	-18.06
KDR	-17.7
ZFHX4	-17.51
TAGLN	-17.35
SEMA5B	-17.26
OTX2	-16.78
DMKN	-16.76
DLK1	-16.23
AC136352.5	-16.19
NPY	-16.17
LCTL	-16.03
LIPG	-15.93
RP11-256I9.2	-15.46
CACNG3	-15.16
MAP2	-15.11
NCAN	-14.92
PROM1	-14.84
SORBS2	-14.82
PALLD	-14.36
PCDH1	-14.26
SLC7A3	-14.15
PIPOX	-14.01
CREB5	-13.99
OLFM3	-13.32
TSPAN2	-13.29
FST	-13.25
GRIN2B	-13.05
SLC7A11	-13.02
TNC	-12.89

## Sheet: NMP-NC D6 vs D3 ANC-up
GENE	FOLD DIFFERENCE VS D3 ANC
HOXB9	5085.5
HOXB-AS3	2494.12
HOXA-AS3	613.81
COL11A2	245.57
HOXA2	164.29
HOXB3; HOXB4; MIR10A	113.9
HOTAIRM1	103.6
MOXD1	97.29
HOXB7	94.86
NPR3	94.69
HHIP	73.65
ADAM12	62.29
ASXL3	57.82
NID1	54.84
BGN	51.55
CDX2	48.23
HOXA7	38.9
GFRA2	29.71
NR2F1	28.41
MGLL	27.78
HAGLR	27.26
NR2F2	26.88
HOXB2	23.28
HOXC6; HOXC4; HOXC5	21.82
DUSP6	21.18
HOXC8	18.76
NDP	17.79
MEF2C	17.1
FLJ12825; RP11-834C11.3	15.9
ABCG2	15.73
UNC5C	15.73
ATRNL1	15.67
LPAR6	15
CNTN4	14.58
DAAM2	13.74
ERBB3	12.88
HOXA1	12.85
KIAA1456	12.6
IGFBP3	12.59
HOXB-AS1	12.44
CAMKV	11.66
HOXC9	11.6
GFRA3	11.49
PLAGL1; HYMAI	11.36
SOX6; MIR6073	11.3
TSHZ2	11.24
SPON1	11.21
SCRG1	11
SLIT2	10.96
SMYD2	10.48
HOXB8	10.36
BCHE	10.1
CPE	9.83
HOXB6	9.82
TBX2	9.8
CCDC3	9.65
GSTM3	9.63
INSC	9.58
ZNF503	9.32
AFF3	9.28
SOX10	9.08
RP11-386I14.4	9.06
SEMA3C	9.04
GFRA1	8.76
HOXA10-AS	8.67
HOXA5	8.38
CCDC92	8.22
PIK3R1	8.17
COL3A1; MIR3606	8.11
SERPINB9	8.03
RP11-849I19.1; plorker	7.98
ITGA8	7.8
GDF10	7.77
ZNF804A	7.76
PDGFC	7.76
RBMS3	7.72
CHMP3	7.68
AMOT; MIR4329	7.53
TUBB3; MC1R	7.52
GRID2	7.5
CST3	7.48
TAGLN3	7.47
PRICKLE1	7.41
SKAP2	7.31
MMP2	7.27
HOXD4	7.2
SNAP25	7.16
NDNF	7.14
HOXB1	6.99
FOXD2-AS1	6.98
GUCY1A3	6.88
MLLT3	6.83
MPZ	6.74
RASL11B	6.74
MITF	6.72
OSBPL10	6.69
RNU11	6.61
WNT5A	6.57
EYA1	6.56
CCDC92	6.56

## Sheet: NMP-NC D6 vs D3 ANC-down
GENE	FOLD DIFFERENCE VS D3 ANC
OTX2	-1388.61
JAKMIP2-AS1	-583.22
LMO1	-508.17
CLU; MIR6843	-378.32
MIR302C	-335.08
LHX5	-301.72
BMP2	-167.74
DLK1	-145.44
CDH9	-136.03
PAX2	-133.35
LHX5-AS1	-126.81
MIR302B	-113.87
VAT1L	-108.89
DMBX1	-103.4
ESRG	-92.86
PAMR1	-82.16
ANXA3	-78.54
CDH23	-78.08
LRRTM1	-75.69
VSNL1	-75.48
PAX7	-74.67
CAPN6	-71.19
MIR302A	-69.66
DMKN	-67.33
SEZ6	-61.48
TFPI	-59.58
CLDN6	-59.57
PODXL	-59.01
NMNAT2	-56.35
LGI1	-48.28
WNT4	-47.74
CNTN2	-46.75
ZIC3	-44.15
SHISA2	-44.1
DKFZP586I1420	-41.4
CD9	-41.22
C8orf34	-38.25
PIPOX	-37.36
TUNAR	-36.96
HAPLN1	-33.4
PRSS8	-32.31
CYP2S1	-32.16
ACTC1	-32.08
ANXA1	-31.01
SEL1L3	-30.94
MAP2	-30.4
SLIT1; ARHGAP19-SLIT1	-30.08
BST2	-29.9
EGLN3	-28.59
CHRNB4	-28.56
CHRNA3	-28.17
MAL2	-27.89
IRS4	-27.15
BMPER	-27.07
CTB-151G24.2	-26.2
PKDCC	-25.37
ZFHX4	-25.33
TPBG	-25.22
DAZL	-25.19
PRKCB	-24.75
C8orf34-AS1	-24.13
TEK	-22.64
IER3	-22.33
ESRP1	-22.06
EHD2	-21.95
TTC29	-21.66
PLA2G7	-21.44
GRIN2B	-20.31
KDR	-19.55
NPY	-19.1
PLP2	-18.66
ZFP42	-18.62
EPHA7	-18.31
SYT2	-18.21
WNT1	-18.03
NCAN	-17.61
POU5F1	-17.22
SPRY4	-17.18
PCDH1	-17.13
SEMA5B	-17.01
LSR	-16.7
LRRC4C	-16.6
USP44	-16.49
CDH1	-15.83
KRT19	-15.53
GLDC	-15.41
THBS1	-15.33
DLX5	-15.06
LRRN3	-14.88
NRIP3	-14.77
CACNG3	-14.77
ATP8A1	-14.15
PLAU	-13.87
NBEA	-13.79
SCGB3A2	-13.79
TFAP2A	-13.76
SLC7A8	-13.62
CTSV	-13.6
VRTN	-13.41
