# Supplementary material for: Human axial progenitors generate trunk neural crest cells in vitro
Source: eLife. 2018 Aug 10;7:e35786. doi: 10.7554/eLife.35786 (PMC6101942; doi:10.7554/eLife.35786)
Supplement: Supplementary file 5. [file elife-35786-supp5.xlsx]

## Sheet: Sheet1
			Gene	Forward	Reverse	Roche Probe
			ETS1	gcagaatgagctactttgtgga	ttgctaggtccttgcctca	3
			SOX8	cttggagatgggcaccac	ctgctgcagctccgtctt	77
			SOX9	gtacccgcacttgcacaac	tctcgctctcgttcagaagtc	61
			PAX3	aggaggccgacttggaga	cttcatctgattggggtgct	13
			TFAP2b	cctgcactcccgaaagaata	gcgccagtagatccgtaaat	49
			DMBX1	ccccaaagctgagaagagc	gccacaggagtgatggtca	23
			SNAI1	gctgcaggactctaatccaga	atctccggaggtgggatg	11
			SNAI2 (Slug)	tggttgcttcaaggacacat	gcaaatgctctgttgcagtg	7
			OTX2	gggtatggacttgctgcac	ccgagtgaacgtcgtcct	81
			HES6	agcccctggtggagaaga	cagcacttcggcgttctc	17
			ZIC3	tgcgcaaacacatgaagg	tatagcgggtggagtggaag	74
			MSX1	ctcgtcaaagccgagagc	cggttcgtcttgtgtttgc	7
			HOXB1	ccagctagggggcttgtc	atgctgcggaggatatgg	39
			HOXB2	aatccgccacgtctcctt	gctgcgtgttggtgtaagc	70
			HOXB4	ctggatgcgcaaagttcac	agcggttgtagtgaaattcctt	62
			HOXB5	aagcttcacatcagccatga	cggttgaagtggaactccttt	1
			HOXC8	tcccagcctcatgtttcc	tgataccggctgtaagtttgc	86
			HOXC9	gcagcaagcacaaagagga	cgtctggtacttggtgtaggg	85
			PHOX2B	ctaccccgacatctacactcg	ctcctgcttgcgaaacttg	17
			ASCL1	cgacttcaccaactggttctg	atgcaggttgtgcgatca	38
			FGF8	agctcgcttccctgttcc	attaggtgaggactgaacagttacc	45
			WNT3a	ctgagggtgggcttttcc	gaggagtactgccccgttta	15
			CDX2	atcaccatccggaggaaag	tgcggttctgaaaccagatt	34
			NKX1-2	gtcgaagcggggaaagat	gatcctccgcatcctcct	78
			TBP	gaacatcatggatcagaacaaca	atagggattccgggagtcat	87
			GAPDH	agccacatcgctcagacac	gcccaatacgaccaaatcc	60
			OCT4	gtggagagcaactccgatg	tgcagagctttgatgtcctg	78
			NANOG	agatgcctcacacggagact	ggactggtggaagaatcagg	69
			SOX1	gaagcccagatggaaatacg	ggacaaggaagggtgttgag	66
			SOX2	atgggttcggtggtcaagt	ggaggaagaggtaaccacagg	19
			T	gctgtgacaggtacccaacc	catgcaggtgagttgtcag	23
			GATA2	ttgtgcaaattgtcagacgac	tcatggtcagtggcctgtta	77
			GATA3	gcttcggatgcaagtcca	gccccacagttcacacact	8
			TH	acgccaaggacaagctca	agcgtgtacgggtcgaact	42
			DBH	tctccatgcactgcaacaa	ggctgcaggttccattca	30
			PHOX2a	cactaccccgacatttacacg	gctcctgtttgcggaactt	17
			PHOX2b	ctaccccgacatctacactcg	ctcctgcttgcgaaacttg	17
